# Supplementary material
Source: PubMed Central journal article supplement (PMC5498720)
Supplement: CVI.00081-17_zcd999095494s1.pdf [file CVI.00081-17_zcd999095494s1.pdf]

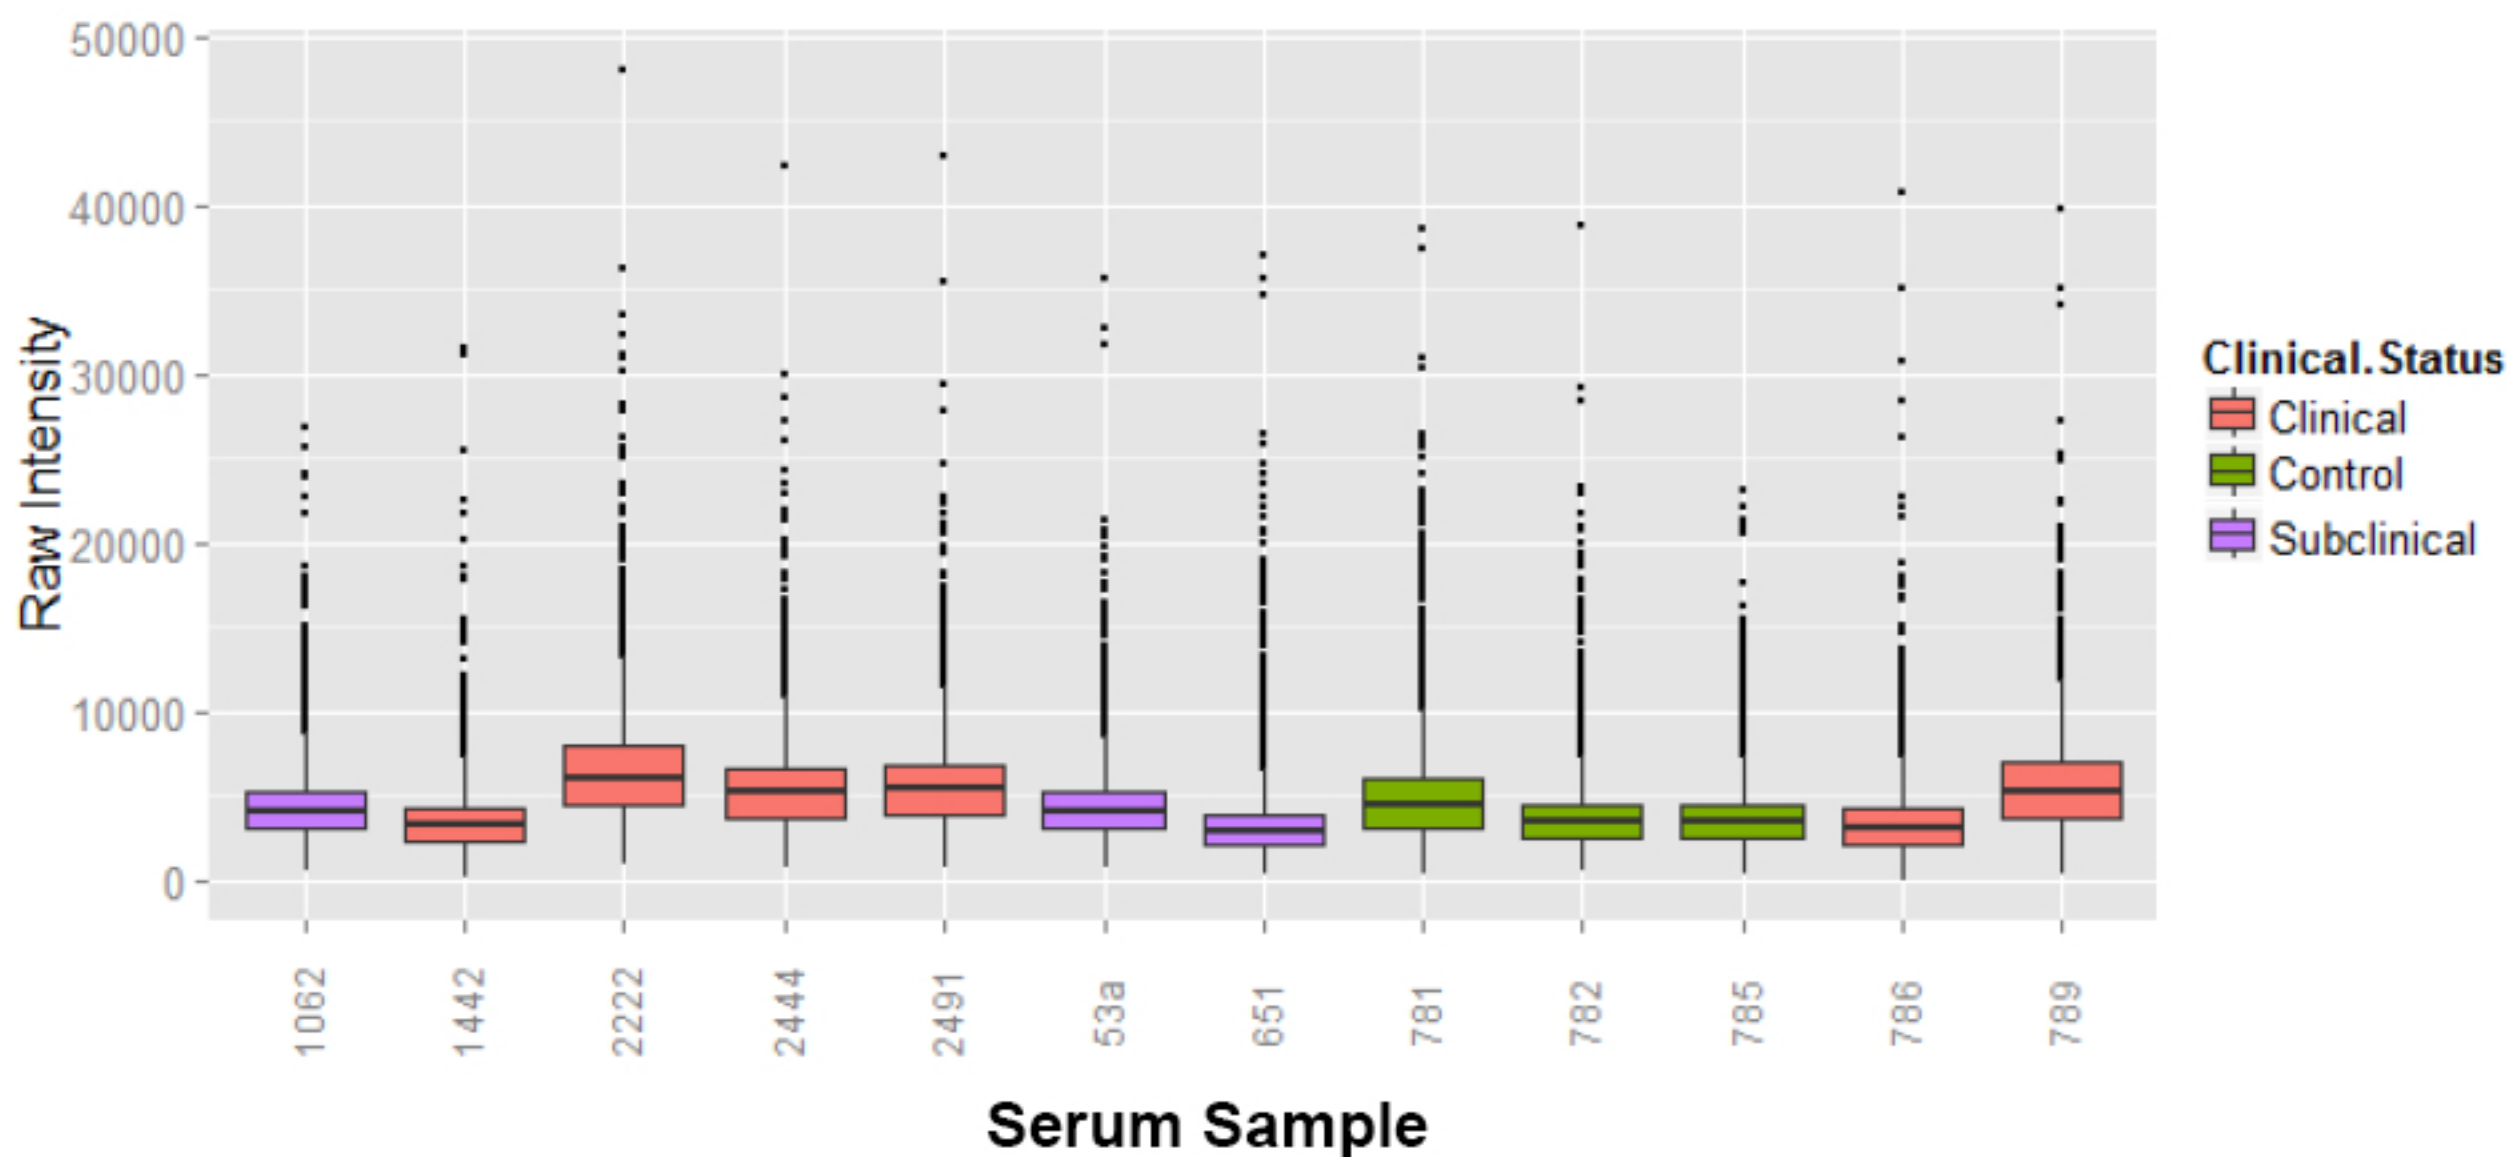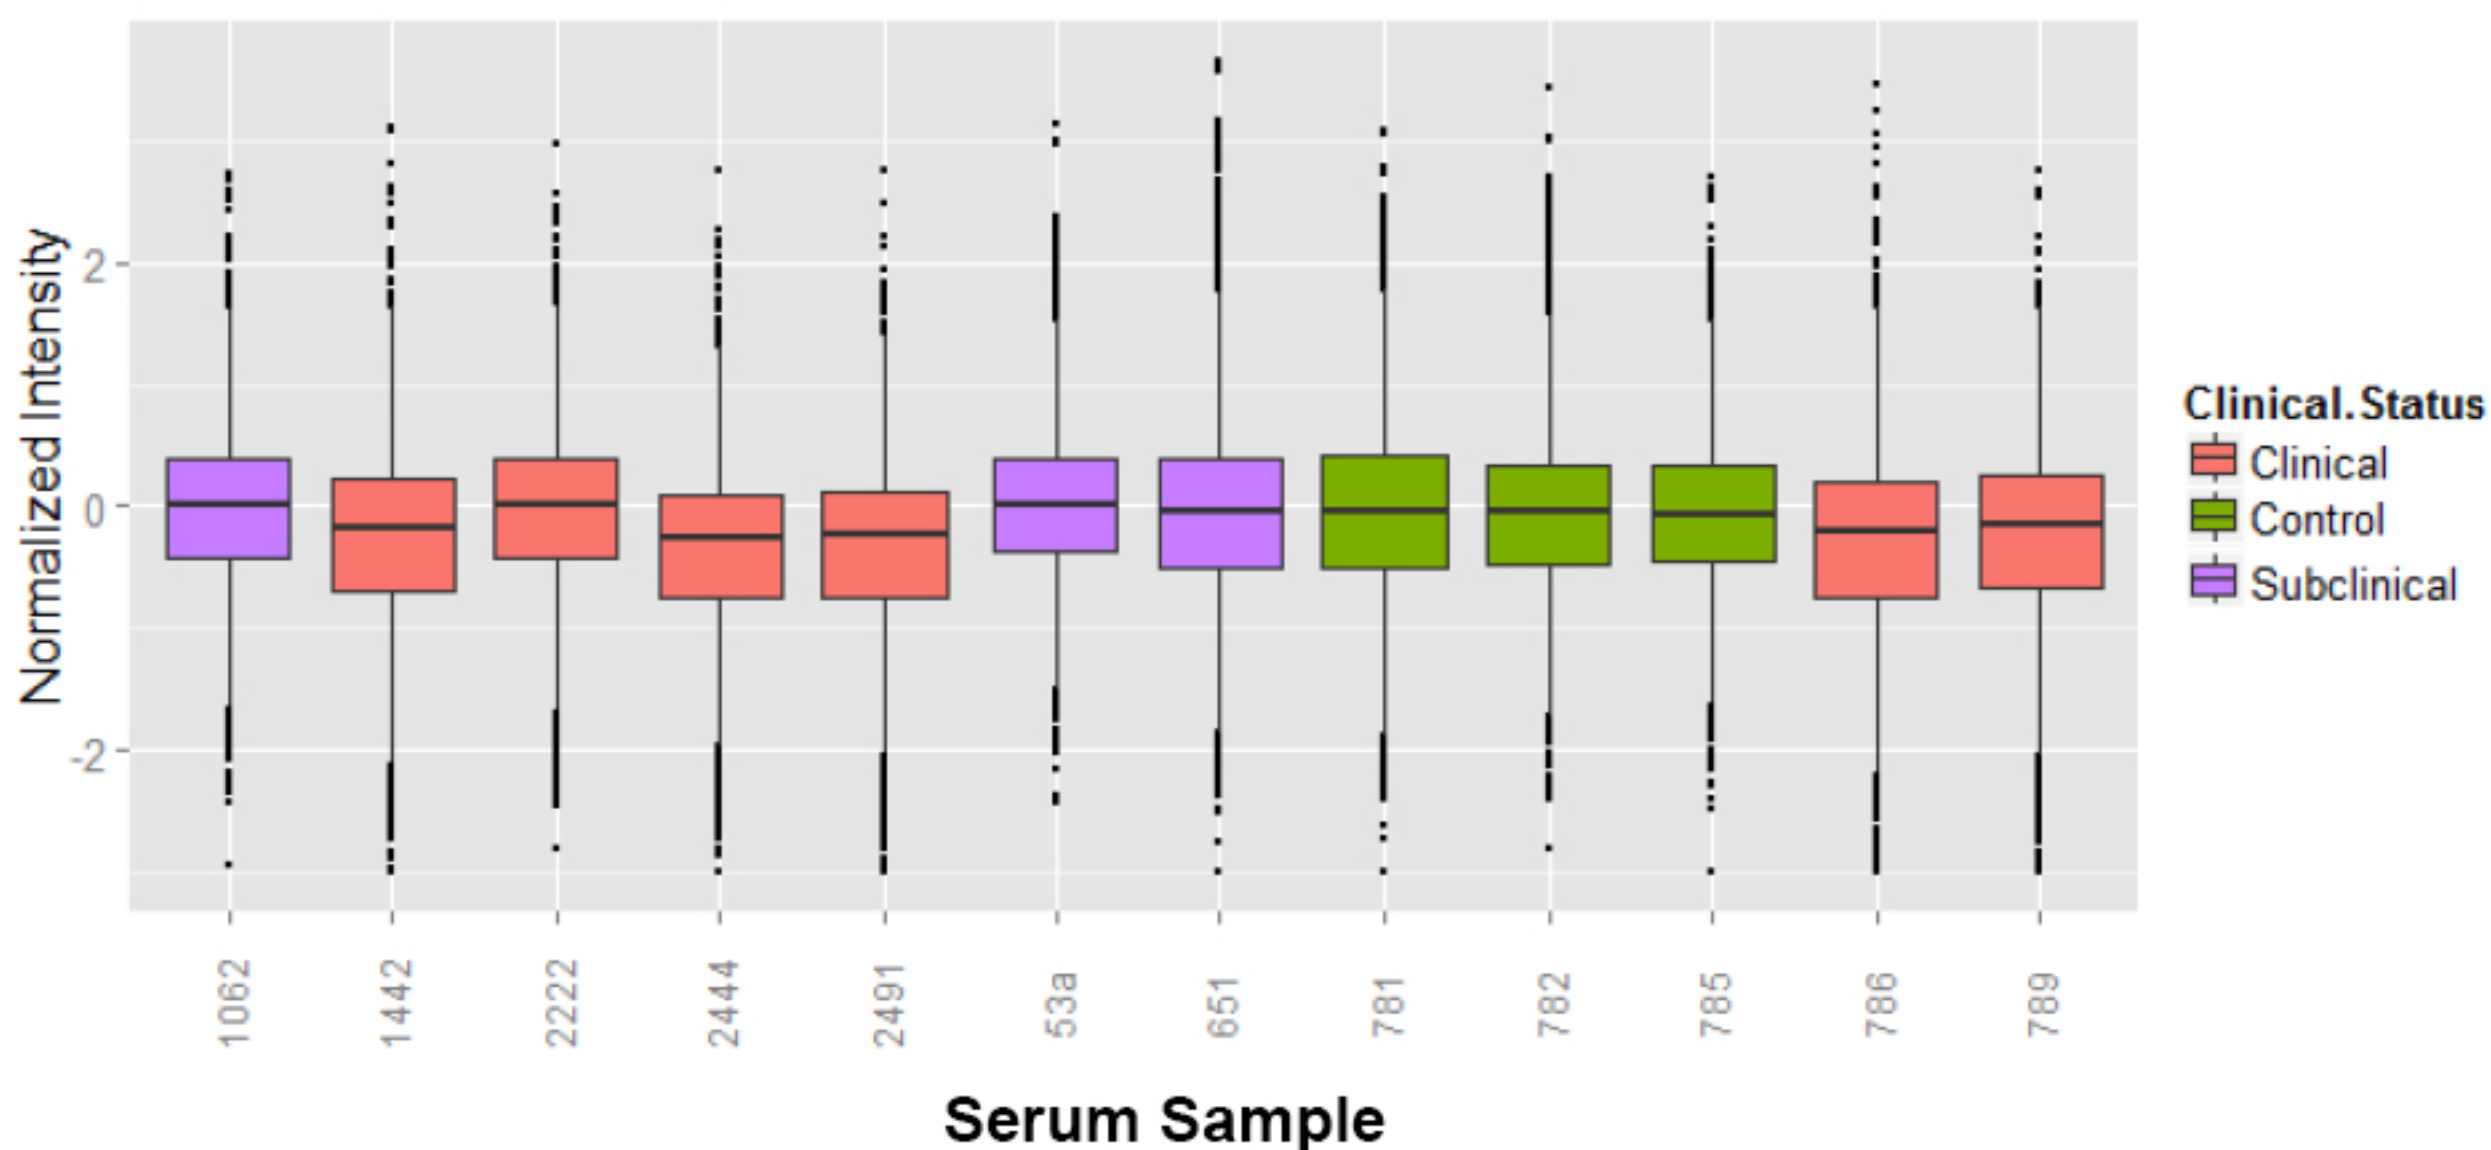

**Figure S1. Box plots showing the overall distribution of antibody responses to Mtb proteins. Raw (A) and normalized (B) signal intensities for each health status are shown in box plots for all arrayed Mtb proteins. The black horizontal bar, box, whiskers, and dots indicate the median, range, 1.5 times the interquartile range, and outliers, respectively. Boxes are colored based on health status of the animal (Clinical – red; Subclinical – purple; Control – green).**

# Table S1

Table S1. Percent identity of CDS for sequenced mycobacterial genomes using strain MAP4 as the reference.

| Mycobacterium avium subsp. paratuberculosis MAP4 |                                                           |            |            | Mycobacterium tuberculosis H37Rv         |              |            |            | Mycobacterium bovis AF212/97    |              |            |            | Mycobacterium avium 104              |              |            |            | Mycobacterium bovis BCG str.    |              |            |            | Mycobacterium avium subsp. paratuberculosis K-10 |              |            |              |                                         |      |       |
|--------------------------------------------------|-----------------------------------------------------------|------------|------------|------------------------------------------|--------------|------------|------------|---------------------------------|--------------|------------|------------|--------------------------------------|--------------|------------|------------|---------------------------------|--------------|------------|------------|--------------------------------------------------|--------------|------------|--------------|-----------------------------------------|------|-------|
| Locust Tag                                       | Product                                                   | CDS length | Locust Tag | Product                                  | % ID to MAP4 | CDS length | Locust Tag | Product                         | % ID to MAP4 | CDS length | Locust Tag | Product                              | % ID to MAP4 | CDS length | Locust Tag | Product                         | % ID to MAP4 | CDS length | Locust Tag | Product                                          | % ID to MAP4 | CDS length | % ID to MAP4 |                                         |      |       |
| MAP4_0001                                        | chromosomal replication initiator protein DnaA            | 509        | Rv0001     | Chromosomal replication initiator pr     | 88.56        | 507        | Mb0001     | chromosome replication initi    | 87.67        | 507        | MbV_0001   | chromosomal replication initiation   | 99.6         | 498        | BCG_0001   | chromosomal replication initia  | 87.87        | 507        | MAPO001    | chromosomal replication initiation prot          | 509          | 100        | MAPO001      | chromosomal replication initiation prot | 509  | 100   |
| MAP4_0002                                        | DNA polymerase III beta subunit                           | 399        | Rv0002     | DNA polymerase III (beta chain) Dna      | 85.82        | 402        | Mb0002     | DNA polymerase III subunit beta | 85.57        | 402        | MbV_0002   | DNA polymerase III subunit beta      | 99.48        | 382        | BCG_0002   | DNA polymerase III subunit beta | 85.57        | 402        | MAPO002    | DNA polymerase III subunit beta                  | 399          | 99.75      | MAPO002      | DNA polymerase III subunit beta         | 399  | 99.75 |
| MAP4_0003                                        | DNA replication and repair protein RecF                   | 389        | Rv0003     | DNA replication and repair protein RecF  | 76.62        | 385        | Mb0003     | recombination protein F         | 76.36        | 385        | MbV_0003   | recombination protein F              | 98.18        | 385        | BCG_0003   | recombination protein F         | 76.36        | 385        | MAPO003    | recombination protein F                          | 389          | 100        | MAPO003      | recombination protein F                 | 389  | 100   |
| MAP4_0004                                        | DNA gyrase subunit A                                      | 181        | Rv0004     | DNA gyrase subunit A                     | 81.93        | 187        | Mb0004     | gyrase subunit A                | 81.93        | 187        | MbV_0004   | gyrase subunit A                     | 99.45        | 181        | BCG_0004   | gyrase subunit A                | 81.93        | 187        | MAPO004    | gyrase subunit A                                 | 181          | 100        | MAPO004      | gyrase subunit A                        | 181  | 100   |
| MAP4_0005                                        | DNA gyrase subunit B                                      | 677        | Rv0005     | DNA gyrase (subunit B) GyrB (DNA t       | 90.99        | 675        | Mb0005     | DNA gyrase subunit B            | 90.69        | 714        | MbV_0005   | DNA gyrase subunit B                 | 100          | 677        | BCG_0005   | DNA gyrase subunit B            | 90.69        | 675        | MAPO005    | DNA gyrase subunit B                             | 677          | 100        | MAPO005      | DNA gyrase subunit B                    | 677  | 100   |
| MAP4_0006                                        | DNA gyrase subunit A                                      | 839        | Rv0006     | DNA gyrase subunit A                     | 94.12        | 838        | Mb0006     | DNA gyrase subunit A            | 94.24        | 838        | MbV_0006   | DNA gyrase subunit A                 | 99.76        | 839        | BCG_0006   | DNA gyrase subunit A            | 94.36        | 838        | MAPO006    | DNA gyrase subunit A                             | 839          | 100        | MAPO006      | DNA gyrase subunit A                    | 839  | 100   |
| MAP4_0007                                        | putative conserved membrane protein                       | 283        | Rv0007     | putative conserved membrane prot         | 63.69        | 304        | Mb0007     | hypothetical protein            | 63.38        | 304        | MbV_0007   | hypothetical protein                 | 97.57        | 287        | BCG_0007   | hypothetical protein            | 63.69        | 304        | MAPO007    | hypothetical protein                             | 283          | 100        | MAPO007      | hypothetical protein                    | 283  | 100   |
| MAP4_0008                                        | Transposase                                               | 395        | Rv0755A    | Putative transposase (fragment)          | 90.57        | 61         | Mb0758     | transposase                     | 90.57        | 61         | MbV_0752   | transposase                          | 28.75        | 345        | BCG_0007C  | transposase                     | 90.57        | 63         | MAPO428    | hypothetical protein                             | 395          | 100        | MAPO428      | hypothetical protein                    | 395  | 100   |
| MAP4_0009                                        | Transposase                                               | 411        | Rv340x     | Probable transposase                     | 69           | 409        | Mb345x     | transposase                     | 69           | 409        | MbV_340x   | Transposase. Mutator family prot     | 100          | 425        | BCG_3098x  | transposase                     | 69           | 409        | MAPO104    | hypothetical protein                             | 411          | 100        | MAPO104      | hypothetical protein                    | 411  | 100   |
| MAP4_0100                                        | Transcriptional regulator, AraC family                    | 252        | Rv1317c    | Probable bifunctional regulatory pro     | 37.1         | 496        | Mb1350c    | methylated-DNA-protein-cry      | 37.1         | 416        | MbV_0221   | AraC family transcriptional regulat  | 32.76        | 268        | BCG_1378x  | Ala regulatory protein alkA     | 37.1         | 496        | MAP375x    | hypothetical protein                             | 252          | 100        | MAP375x      | hypothetical protein                    | 252  | 100   |
| MAP4_0101                                        | hypothetical protein                                      | 368        | Rv2307i    | hypothetical protein                     | 40           | 281        | Mb2330c    | hypothetical protein            | 40           | 281        | MbV_2243   | alpha-beta hydrolase                 | 30.93        | 519        | BCG_2324x  | hypothetical protein            | 40           | 281        | MAP3757x   | hypothetical protein                             | 368          | 100        | MAP3757x     | hypothetical protein                    | 368  | 100   |
| MAP4_0102                                        | putative oxidoreductase                                   | 286        | Rv0444c    | Possible oxidoreductase                  | 43.51        | 264        | Mb0455c    | oxidoreductase                  | 43.51        | 264        | MbV_0061   | MnclI protein                        | 44.27        | 259        | BCG_0075x  | oxidoreductase                  | 43.51        | 264        | MAP3756x   | hypothetical protein                             | 286          | 100        | MAP3756x     | hypothetical protein                    | 286  | 100   |
| MAP4_0103                                        | putative oxidoreductase                                   | 74         | Rv1937     | possible oxygenase                       | 55           | 839        | Mb1972     | oxygenase                       | 55           | 839        | MbV_3829   | thiamine monophosphate kinase        | 47.83        | 215        | BCG_1976   | oxygenase                       | 55           | 839        | MAP3754x   | hypothetical protein                             | 74           | 100        | MAP3754x     | hypothetical protein                    | 74   | 100   |
| MAP4_0104                                        | hypothetical protein                                      | 450        | Rv2124c    | hypothetical protein                     | 38.89        | 457        | Mb2141c    | hypothetical protein            | 38.89        | 457        | MbV_4881   | hypothetical protein                 | 45.68        | 450        | BCG_2125x  | hypothetical protein            | 38.89        | 457        | MAP3753x   | hypothetical protein                             | 450          | 100        | MAP3753x     | hypothetical protein                    | 450  | 100   |
| MAP4_0107                                        | fatty-acyl-CoA ligase FadD28                              | 578        | Rv2941     | fatty-acyl-AMP ligase FadD28 (fatty      | 64.87        | 580        | Mb2956     | acyl-CoA synthetase             | 64.59        | 580        | MbV_1328   | acyl-CoA synthetase                  | 61.25        | 579        | BCG_2963   | acyl-CoA synthetase             | 64.87        | 580        | MAP3752x   | acyl-CoA synthetase                              | 578          | 100        | MAP3752x     | acyl-CoA synthetase                     | 578  | 100   |
| MAP4_0109                                        | transmembrane transport protein, MmpL4_5                  | 979        | Rv0450c    | transmembrane transport protein, MmpL4_5 | 65.69        | 967        | Mb0458c    | transmembrane transport pr      | 65.58        | 967        | MbV_3863   | MmpL4 protein                        | 65.4         | 972        | BCG_0489x  | transmembrane transport prot    | 65.69        | 967        | MAP3751x   | hypothetical protein                             | 979          | 100        | MAP3751x     | hypothetical protein                    | 979  | 100   |
| MAP4_0110                                        | membrane protein, MmpS family                             | 154        | Rv0403c    | Probable conserved membrane prot         | 50.72        | 142        | Mb1582     | membrane protein                | 55.17        | 148        | MbV_3864   | MmpS4 protein                        | 48.97        | 148        | BCG_160x   | membrane protein mmpS6          | 55.17        | 142        | MAP3750x   | hypothetical protein                             | 154          | 100        | MAP3750x     | hypothetical protein                    | 154  | 100   |
| MAP4_0200                                        | dehydrogenase                                             | 286        | Rv07750    | Probable dehydrogenase                   | 42.7         | 272        | Mb07750    | beta-ketoacyl-ACP reductase     | 42.7         | 272        | MbV_1881   | carveol dehydrogenase                | 60.35        | 285        | BCG_2768   | beta-ketoacyl-ACP reductase     | 42.7         | 272        | MAP3749x   | hypothetical protein                             | 286          | 100        | MAP3749x     | hypothetical protein                    | 286  | 100   |
| MAP4_0201                                        | transposase, IS1110                                       | 402        | Rv0737     | Putative transposase for insertion s     | 29.25        | 364        | Mb0720     | transposase IS1161/110/S902     | 29.25        | 364        | MbV_0406   | transposase IS1161/110/S902          | 31.65        | 404        | BCG_0849   | transposase for insertion sequ  | 29.25        | 364        | MAP3748x   | IS1110 transposase                               | 402          | 100        | MAP3748x     | IS1110 transposase                      | 402  | 100   |
| MAP4_0202                                        | putative cobalamin synthesis protein                      | 406        | Rv0106     | hypothetical protein                     | 52.32        | 398        | Mb0109     | hypothetical protein            | 52.32        | 398        | MbV_4874   | CoM/P47k domain-containing prot      | 53.99        | 381        | BCG_0139   | hypothetical protein            | 52.32        | 398        | MAP3747x   | hypothetical protein                             | 406          | 100        | MAP3747x     | hypothetical protein                    | 406  | 100   |
| MAP4_0203                                        | hypothetical protein                                      | 104        | Rv0190     | hypothetical protein                     | 79.35        | 96         | Mb0196     | hypothetical protein            | 79.35        | 96         | MbV_4988   | hypothetical protein                 | 77.66        | 96         | BCG_0227   | hypothetical protein            | 79.35        | 96         | MAP3746x   | hypothetical protein                             | 104          | 100        | MAP3746x     | hypothetical protein                    | 104  | 100   |
| MAP4_0204                                        | hypothetical protein                                      | 250        | Rv02928    | Probable thioesterase TesA               | 28.83        | 261        | Mb0293x    | thioesterase                    | 28.83        | 261        | MbV_2010   | phenylloxalazine synthase mbt3       | 30.73        | 220        | BCG_2950   | thioesterase tesA               | 28.83        | 261        | MAP3745x   | hypothetical protein                             | 250          | 100        | MAP3745x     | hypothetical protein                    | 250  | 100   |
| MAP4_0205                                        | hypothetical protein                                      | 344        | Rv0617     | Possible toxin VacC2 Contains Pn         | 45.83        | 133        | Mb0634     | hypothetical protein            | 45.83        | 133        | MbV_1787   | surfilly reductase [ferredoxin 2]    | 24.32        | 520        | BCG_0664   | hypothetical protein            | 45.83        | 133        | MAP3744x   | hypothetical protein                             | 344          | 100        | MAP3744x     | hypothetical protein                    | 344  | 100   |
| MAP4_0206                                        | hypothetical protein                                      | 310        | Rv249c     | hypothetical protein                     | 32.38        | 429        | Mb249c     | hypothetical protein            | 32.38        | 429        | MbV_2012   | thioesterase                         | 31.25        | 299        | BCG_0128   | hypothetical protein            | 32.38        | 429        | MAP3743x   | hypothetical protein                             | 310          | 100        | MAP3743x     | hypothetical protein                    | 310  | 100   |
| MAP4_0209                                        | putative non-ribosomal peptide synthase                   | 3068       | Rv2383c    | Phenylloxalazine synthase MMB (ph        | 37.53        | 1414       | Mb2040c    | phenylloxalazine synthase       | 37.53        | 1414       | MbV_2009   | MMB prot                             | 36.6         | 1164       | BCG_2397x  | phenylloxalazine synthase mbt   | 37.53        | 1414       | MAP3740x   | hypothetical protein                             | 3068         | 100        | MAP3740x     | hypothetical protein                    | 3068 | 100   |
| MAP4_0300                                        | putative transporter, major facilitator superfamily prot  | 518        | Rv3728     | Probable conserved two-domain mem        | 36.67        | 1005       | Mb3755     | hypothetical protein            | 36.67        | 1005       | MbV_1387   | drug transporter                     | 28.42        | 626        | BCG_378x   | hypothetical protein            | 36.67        | 1005       | MAP3739x   | hypothetical protein                             | 518          | 100        | MAP3739x     | hypothetical protein                    | 518  | 100   |
| MAP4_0301                                        | hypothetical protein                                      | 244        | Rv3913c    | 16S rRNA methyletransferase              | 34.62        | 224        | Mb3950c    | 16S rRNA methyltransferase 4    | 34.62        | 224        | MbV_2728   | hypothetical protein                 | 39.02        | 255        | BCG_0025x  | 16S rRNA methyltransferase G    | 34.62        | 224        | MAP3738x   | hypothetical protein                             | 244          | 100        | MAP3738x     | hypothetical protein                    | 244  | 100   |
| MAP4_0302                                        | PPE family protein                                        | 500        | Rv0453     | PPE family protein PPE11                 | 43.16        | 518        | Mb0461     | PPE family protein              | 43.16        | 518        | MbV_4867   | PPE family protein                   | 49.01        | 493        | BCG_0492   | PPE family protein              | 43.16        | 518        | MAP3737x   | hypothetical protein                             | 500          | 100        | MAP3737x     | hypothetical protein                    | 500  | 100   |
| MAP4_0303                                        | hypothetical protein                                      | 250        | Rv1148c    | Probable transmembrane protein           | 40           | 281        | Mb1148c    | transmembrane transport memb    | 40           | 281        | MbV_4882   | transmembrane transport memb         | 40           | 281        | BCG_1410   | transmembrane transport memb    | 40           | 281        | MAP3736x   | hypothetical protein                             | 250          | 100        | MAP3736x     | hypothetical protein                    | 250  | 100   |
| MAP4_0304                                        | ABC transporter ATP-binding protein                       | 429        | Rv1348     | iron-regulated transporter IRTA          | 41.59        | 859        | Mb1383     | drug-transport transmembr       | 41.59        | 859        | MbV_1566   | ABC transporter ATP-binding prot     | 40.51        | 862        | BCG_1410   | drug-transport transmembr       | 41.59        | 859        | MAP3735x   | hypothetical protein                             | 429          | 100        | MAP3735x     | hypothetical protein                    | 429  | 100   |
| MAP4_0305                                        | putative ABC transporter ATPase and permease compo        | 593        | Rv1349     | iron-regulated transporter IRTA          | 33.96        | 579        | Mb1384     | drug-transport transmembr       | 33.96        | 579        | MbV_1567   | ABC transporter ATP-binding prot     | 33.73        | 578        | BCG_1411   | drug-transport transmembr       | 33.96        | 579        | MAP3734x   | hypothetical protein                             | 593          | 100        | MAP3734x     | hypothetical protein                    | 593  | 100   |
| MAP4_0306                                        | hypothetical protein                                      | 238        | Rv0301     | hypothetical protein                     | 42.86        | 526        | Mb0307     | hypothetical protein            | 42.86        | 526        | MbV_4091   | transferase                          | 40.91        | 321        | BCG_3704x  | hypothetical protein            | 42.86        | 526        | MAP3733x   | hypothetical protein                             | 238          | 100        | MAP3733x     | hypothetical protein                    | 238  | 100   |
| MAP4_0307                                        | putative ABC-type cobalt transport system, permease compo | 207        | Rv3305c    | Possible N-acyl-L-amino acid amidoh      | 34.29        | 389        | Mb3333c    | N-acyl-L-amino acid amidohy     | 34.29        | 389        | MbV_4091   | transferase                          | 40.91        | 321        | BCG_3370x  | N-acyl-L-amino acid amidohy     | 34.29        | 389        | MAP3732x   | hypothetical protein                             | 207          | 100        | MAP3732x     | hypothetical protein                    | 207  | 100   |
| MAP4_0308                                        | putative ABC transporter, ATP-binding protein             | 333        | Rv1026c    | Possible transmembrane ATP-binding p     | 23.33        | 229        | Mb1026c    | transmembrane ATP-binding prot  | 23.33        | 229        | MbV_4093   | lipid division ATP-binding protein F | 33.89        | 239        | BCG_2137x  | lipid division ATP-binding prot | 33.33        | 229        | MAP3731x   | hypothetical protein                             | 333          | 100        | MAP3731x     | hypothetical protein                    | 333  | 100   |
| MAP4_0309                                        | methytransferase                                          | 210        | Rv1377c    | Putative transmembrane ATP-binding p     | 36.63        | 212        | Mb1412c    | transferase                     | 36.63        | 212        | MbV_2216   | CheR methyltransferase SAM bindi     | 35.97        | 216        | BCG_1438x  | transferase                     | 36.63        | 212        | MAP3730x   | hypothetical protein                             | 210          | 100        | MAP3730x     | hypothetical protein                    | 210  | 100   |
| MAP4_0400                                        | putative taurine dioxygenase                              | 258        | Rv3400     | putative dioxygenase                     | 33.33        | 295        | Mb3400     | dioxygenase                     | 33.33        | 295        | MbV_4353   | alka-ketoputridate-dependent tau     | 32.58        | 297        | BCG_3476   | dioxygenase                     | 33.33        | 295        | MAP3729x   | hypothetical protein                             | 258          | 100        | MAP3729x     | hypothetical protein                    | 258  | 100   |
| MAP4_0401                                        | putative periplasmic binding protein                      | 345        | Rv0676c    | Probable conserved transmembrane         | 30           | 964        | Mb0695c    | transmembrane transport pr      | 30           | 964        | MbV_0022   | protein phosphatase 2C               | 28.57        | 499        | BCG_0725x  | transmembrane transport prot    | 30           | 964        | MAP3728x   | hypothetical protein                             | 345          | 100        | MAP3728x     | hypothetical protein                    | 345  | 100   |
| MAP4_0402                                        | putative ABC transporter, ATP-binding protein             | 271        | Rv0933     | Phosphate-transport ATP-binding pr       | 34.02        | 276        | Mb0967c    | ABC transporter ATP-binding     | 31.47        | 287        | MbV_3006   | mycobactin ABC transporter ATP       | 33.18        | 280        | BCG_3065x  | ABC transporter ATP-binding p   | 34.02        | 276        | MAP3727x   | hypothetical protein                             | 271          | 100        | MAP3727x     | hypothetical protein                    | 271  | 100   |
| MAP4_0403                                        | hypothetical protein, FacCD transport family protein      | 142        | Rv0256c    | Probable monooxygenase                   | 41.86        | 485        | Mb0256c    | monooxygenase                   | 41.86        | 485        | MbV_4343   | hydroxylase synthetase subun         | 31.28        | 352        | BCG_0106x  | monooxygenase                   | 41.86        | 485        | MAP3726x   | hypothetical protein                             | 142          | 100        | MAP3726x     | hypothetical protein                    | 142  | 100   |
| MAP4_0404                                        | PPE family protein                                        | 518        | Rv0256c    | PPE family protein PPE2                  | 60.67        | 556        | Mb0262c    | PPE family protein              | 60.67        | 556        | MbV_4349   | PPE family protein                   | 46.99        | 529        | BCG_0294x  | PPE family protein              | 60.67        | 556        | MAP3725x   | hypothetical protein                             | 518          | 100        | MAP3725x     | hypothetical protein                    | 518  | 100   |
|                                                  |                                                           |            |            |                                          |              |            |            |                                 |              |            |            |                                      |              |            |            |                                 |              |            |            |                                                  |              |            |              |                                         |      |       |

Table S1 continued

|           |                                                   |      |         |                                                             |       |      |         |                                     |       |      |          |                                     |       |      |           |                                    |       |      |
|-----------|---------------------------------------------------|------|---------|-------------------------------------------------------------|-------|------|---------|-------------------------------------|-------|------|----------|-------------------------------------|-------|------|-----------|------------------------------------|-------|------|
| MAP4_0101 | Transcriptional regulator, TetR family            | 227  | Rv0232  | TetR/ACR family transcriptional regulat                     | 86.09 | 229  | MV_4938 | TetR family transcriptional regulat | 99.56 | 227  | BCG_0269 | TetR family transcriptional regulat | 86.09 | 229  | MAP3671   | hypothetical protein               | 327   | 100  |
| MAP4_0102 | Transposase                                       | 329  | Rv2812  | Probable transposase                                        | 32.65 | 469  | MB2836  | Transposase                         | 32.29 | 265  | MV_0752  | Transposase                         | 82.98 | 345  | BCG_2830  | transposase                        | 32.65 | 469  |
| MAP4_0103 | acyl-CoA dehydrogenase F                          | 569  | Rv0231  | Probable acyl-CoA dehydrogenase F                           | 84.26 | 568  | MB0230  | acyl-CoA dehydrogenase              | 84.26 | 568  | MV_4943  | acyl-CoA dehydrogenase              | 99.27 | 569  | BCG_0268  | acyl-CoA dehydrogenase faeC        | 84.26 | 568  |
| MAP4_0104 | phosphotriesterase                                | 328  | Rv0230  | Probable phosphotriesterase Php1-like                       | 92.31 | 328  | MB0235  | acyl-coenzyme A acyltransferase     | 92    | 326  | MV_4940  | acyl-coenzyme A acyltransferase     | 99.67 | 326  | BCG_0267  | phosphotriesterase PhP             | 92    | 328  |
| MAP4_0105 | membrane acyltransferase                          | 406  | Rv0228  | Probable membrane acyltransferase                           | 79.8  | 407  | MB0233  | integral membrane acyltransfer      | 79.8  | 407  | MV_4941  | acyltransferase                     | 99.88 | 393  | BCG_0265  | integral membrane acyltransferase  | 79.8  | 407  |
| MAP4_0106 | putative conserved membrane protein               | 815  | Rv0227  | Probable conserved membrane protein                         | 81.75 | 421  | MB0232  | hypothetical protein                | 81.25 | 421  | MV_4942  | hypothetical protein                | 99.76 | 418  | BCG_0264  | hypothetical protein               | 81.5  | 421  |
| MAP4_0107 | conserved transmembrane protein                   | 543  | Rv0226  | Probable conserved transmembrane protein                    | 74.52 | 576  | MB0231  | transmembrane protein               | 74.52 | 576  | MV_4944  | hypothetical protein                | 98.41 | 565  | BCG_0263  | hypothetical protein               | 74.52 | 576  |
| MAP4_0108 | putative glyoxylate dehydrogenase                 | 388  | Rv0225  | Probable conserved protein                                  | 81.38 | 384  | MB0230  | hypothetical protein                | 84.38 | 384  | MV_4943  | glyoxylate dehydrogenase            | 99.21 | 383  | BCG_0262  | hypothetical protein               | 81.38 | 384  |
| MAP4_0109 | putative methylesterase                           | 255  | Rv0224  | Possible methylesterase (methylase)                         | 82.28 | 254  | MB0229  | methyltransferase                   | 82.28 | 254  | MV_4945  | methylesterase                      | 99.21 | 253  | BCG_0261  | methylesterase                     | 82.28 | 254  |
| MAP4_0110 | aldehyde dehydrogenase                            | 835  | Rv0223  | Probable aldehyde dehydrogenase                             | 83.5  | 487  | MB0228  | aldehyde dehydrogenase              | 78.36 | 385  | MV_4946  | aldehyde dehydrogenase              | 99.59 | 493  | BCG_0259  | aldehyde dehydrogenase             | 78.36 | 385  |
| MAP4_0111 | hypothetical protein                              | 43   | Rv1544  | Probable maltoligoyltrehalose synth                         | 33.33 | 721  | MB1591  | maltoligoyltrehalose synth          | 33.33 | 721  | MV_4947  | hypothetical protein                | 100   | 43   | BCG_16174 | maltoligoyltrehalose synthase      | 33.33 | 721  |
| MAP4_0112 | Transcriptional regulator, TetR family            | 195  | Rv0196  | Possible transcriptional regulator                          | 38.46 | 194  | MB0202  | transcriptional regulator           | 38.46 | 194  | MV_4948  | TetR family transcriptional regulat | 100   | 213  | BCG_0233  | transcriptional regulatory prot    | 38.46 | 194  |
| MAP4_0113 | hypothetical protein                              | 87   | Rv1246  | Multifunctional alpha-ketoglutarate                         | 27.42 | 1231 | MB1206  | alpha-ketoglutarate decarbox        | 27.42 | 1231 | MV_4949  | hypothetical protein                | 98.85 | 98   | BCG_1308  | alpha-ketoglutarate decarboxylase  | 27.42 | 1231 |
| MAP4_0114 | AMP-dependent synthetase and ligase               | 505  | Rv0270  | Probable fatty-acyl-CoA ligase FadE1                        | 31.46 | 560  | MB0375  | acyl-CoA synthetase                 | 31.46 | 560  | MV_4950  | AMP-dependent synthetase and lig    | 99.61 | 569  | BCG_0208  | acyl-CoA synthetase                | 31.46 | 560  |
| MAP4_0116 | enoyl-CoA hydratase                               | 264  | Rv0222  | Probable enoyl-CoA hydratase EChA                           | 84.92 | 262  | MB0345  | enoyl-CoA hydratase                 | 42.97 | 263  | MV_4951  | enoyl-CoA hydratase                 | 99.24 | 264  | BCG_3579  | enoyl-CoA hydratase                | 84.92 | 262  |
| MAP4_0117 | putative acyltransferase                          | 469  | Rv0221  | Possible triacylglycerol synthase (diacylglycerol synthase) | 76.07 | 469  | MB0227  | hypothetical protein                | 76.07 | 469  | MV_4952  | acyltransferase, w/dgat/mgat sub    | 99.79 | 469  | BCG_0258  | hypothetical protein               | 76.07 | 469  |
| MAP4_0118 | esterase LipC                                     | 398  | Rv0220  | Probable esterase LipC                                      | 74.17 | 403  | MB0226  | esterase                            | 74.17 | 403  | MV_4953  | alpha/beta hydrolase                | 100   | 398  | BCG_0257  | esterase LipC                      | 74.17 | 403  |
| MAP4_0119 | esterase LipW                                     | 294  | Rv0217  | Possible esterase LipW                                      | 71.48 | 302  | MB0225  | esterase                            | 71.48 | 302  | MV_4954  | alpha/beta hydrolase                | 99.79 | 302  | BCG_0254  | esterase LipW                      | 71.48 | 302  |
| MAP4_0120 | amidohydrolase family protein                     | 437  | Rv0252  | hypothetical protein                                        | 41.05 | 534  | MB0276  | hypothetical protein                | 41.05 | 534  | MV_4955  | amidohydrolase                      | 99.31 | 437  | BCG_0271  | hypothetical protein               | 41.05 | 534  |
| MAP4_0121 | hypothetical protein                              | 396  | Rv3272  | hypothetical protein                                        | 29.36 | 394  | MB3300  | hypothetical protein                | 29.36 | 394  | MV_4956  | hypothetical protein                | 97.47 | 396  | BCG_3301  | hypothetical protein               | 29.36 | 394  |
| MAP4_0122 | hypothetical protein                              | 340  | Rv0216  | Double holoig. dehydratase                                  | 80.77 | 337  | MB0222  | hypothetical protein                | 80.77 | 337  | MV_4957  | p40 protein                         | 98.82 | 340  | BCG_0253  | hypothetical protein               | 80.77 | 337  |
| MAP4_0123 | acyl-CoA dehydrogenase                            | 405  | Rv0215  | Probable acyl-CoA dehydrogenase F                           | 86.69 | 357  | MB0212  | acyl-CoA dehydrogenase              | 87.01 | 388  | MV_4958  | acyl-CoA dehydrogenase              | 98.99 | 382  | BCG_0252  | acyl-CoA dehydrogenase faeE        | 86.75 | 358  |
| MAP4_0124 | putative enoyl-CoA hydratase isomerase            | 320  | Rv1070  | Probable enoyl-CoA hydratase EChA                           | 35.33 | 257  | MB1099  | enoyl-CoA hydratase/isomerase       | 35.33 | 257  | MV_4960  | enoyl-CoA hydratase/isomerase       | 97.81 | 320  | BCG_1128  | enoyl-CoA hydratase                | 35.33 | 257  |
| MAP4_0125 | fatty-acyl-CoA ligase                             | 505  | Rv0214  | Probable fatty-acyl-CoA ligase FadE1                        | 80.59 | 537  | MB0220  | long-chain-fatty-acyl-CoA ligase    | 80.59 | 537  | MV_4961  | long-chain-fatty-acyl-CoA ligase    | 99.21 | 509  | BCG_0261  | long-chain-fatty-acyl-CoA ligase   | 80.59 | 537  |
| MAP4_0128 | iron-regulated phosphonate pyruvate carboxylase P | 609  | Rv0211  | Probable iron-regulated phosphonate pyruvate carboxylase    | 89.42 | 606  | MB0217  | phosphoenolpyruvate carboxyl        | 89.42 | 606  | MV_4962  | phosphoenolpyruvate carboxylase     | 99.67 | 609  | BCG_0248  | phosphoenolpyruvate carboxylase    | 89.42 | 606  |
| MAP4_0129 | hypothetical protein                              | 511  | Rv0210  | hypothetical protein                                        | 62.96 | 492  | MB0216  | hypothetical protein                | 62.96 | 492  | MV_4964  | hypothetical protein                | 99.41 | 511  | BCG_0247  | hypothetical protein               | 62.96 | 492  |
| MAP4_0130 | hypothetical protein                              | 364  | Rv0209  | hypothetical protein                                        | 59.84 | 361  | MB0215  | hypothetical protein                | 60.11 | 361  | MV_4965  | hypothetical protein                | 97.83 | 368  | BCG_0246  | hypothetical protein               | 60.11 | 361  |
| MAP4_0131 | methytransferase                                  | 259  | Rv0208  | Probable N-methyltransferase (methylase)                    | 66.41 | 263  | MB0214  | RNA (guanine-N7)-methyltransferase  | 66.41 | 263  | MV_4966  | RNA (guanine-N7)-methyltransferase  | 99.21 | 259  | BCG_0244  | RNA (guanine-N7)-methyltransferase | 66.41 | 263  |
| MAP4_0132 | hypothetical protein                              | 217  | Rv0207  | hypothetical protein                                        | 81.4  | 242  | MB0213  | hypothetical protein                | 81.4  | 242  | MV_4967  | hypothetical protein                | 99.36 | 217  | BCG_0244  | hypothetical protein               | 81.4  | 242  |
| MAP4_0133 | transmembrane transport protein                   | 957  | Rv0206  | Possible conserved transmembrane protein                    | 69.64 | 944  | MB0212  | transmembrane transport prot        | 69.64 | 944  | MV_4968  | MmpL3 protein                       | 99.73 | 949  | BCG_0243  | transmembrane transport protein    | 69.64 | 944  |
| MAP4_0134 | hypothetical protein                              | 382  | Rv0205  | Possible conserved transmembrane protein                    | 79.56 | 367  | MB0211  | transmembrane protein               | 79.56 | 367  | MV_4969  | hypothetical protein                | 99.74 | 382  | BCG_0242  | hypothetical protein               | 79.56 | 367  |
| MAP4_0135 | hypothetical protein                              | 393  | Rv0204  | Probable conserved transmembrane protein                    | 80.45 | 412  | MB0210  | transmembrane protein               | 80.6  | 427  | MV_4970  | hypothetical protein                | 99.49 | 393  | BCG_0241  | hypothetical protein               | 80.6  | 427  |
| MAP4_0136 | hypothetical protein                              | 181  | Rv0203  | Possible conserved protein                                  | 67.16 | 136  | MB0209  | hypothetical protein                | 67.16 | 136  | MV_4971  | hypothetical protein                | 99.49 | 181  | BCG_0240  | hypothetical protein               | 67.16 | 136  |
| MAP4_0137 | transmembrane transport protein                   | 1007 | Rv0202  | Probable conserved transmembrane protein                    | 75.86 | 964  | MB0208  | transmembrane transport prot        | 75.86 | 964  | MV_4972  | transmembrane transport prot        | 99.6  | 1007 | BCG_0239  | transmembrane transport protein    | 75.86 | 964  |
| MAP4_0138 | oxidoreductase                                    | 866  | Rv0197  | Possible oxidoreductase                                     | 85.27 | 768  | MB0203  | oxidoreductase                      | 85.41 | 748  | MV_4983  | myo-inositol oxidoreductase Fe-d    | 99.74 | 745  | BCG_0234  | oxidoreductase                     | 85.41 | 748  |
| MAP4_0139 | Transcriptional regulator, TetR family            | 201  | Rv0196  | Possible transcriptional regulatory p                       | 76.72 | 194  | MB0202  | transcriptional regulator           | 76.72 | 194  | MV_4985  | TetR family transcriptional regulat | 99    | 201  | BCG_0233  | transcriptional regulatory prot    | 76.72 | 194  |
| MAP4_0140 | hypothetical protein                              | 345  | Rv0192  | hypothetical protein                                        | 71.31 | 366  | MB0198  | hypothetical protein                | 72    | 352  | MV_4986  | ErikY/YbcY/YcsY/Inh3 family prot    | 100   | 339  | BCG_0229  | hypothetical protein               | 71.6  | 352  |
| MAP4_0141 | hypothetical protein                              | 415  | Rv0191  | Probable conserved integral membr                           | 76.46 | 413  | MB0197  | hypothetical protein                | 76.46 | 413  | MV_4987  | lipoic transporter family protein   | 100   | 413  | BCG_0228  | integral membrane protein          | 76.46 | 413  |
| MAP4_0142 | hypothetical protein                              | 284  | Rv0190  | hypothetical protein                                        | 89.58 | 96   | MB0196  | hypothetical protein                | 89.58 | 96   | MV_4988  | hypothetical protein                | 99.86 | 284  | BCG_0227  | hypothetical protein               | 89.58 | 96   |
| MAP4_0143 | dihydroxy-acyl dehydratase                        | 575  | Rv0189  | Probable dihydroxy-acyl dehydratase                         | 90.96 | 575  | MB0195  | dihydroxy-acyl dehydratase          | 90.96 | 575  | MV_4989  | dihydroxy-acyl dehydratase          | 100   | 575  | BCG_0226  | dihydroxy-acyl dehydratase         | 90.96 | 575  |
| MAP4_0144 | hypothetical protein                              | 144  | Rv0188  | Probable conserved transmembrane protein                    | 74.83 | 143  | MB0194  | transmembrane protein               | 74.83 | 143  | MV_4991  | alpha/beta hydrolase                | 26.95 | 520  | BCG_0225  | hypothetical protein               | 74.83 | 143  |
| MAP4_0145 | oxidoreductase                                    | 327  | Rv3553  | Possible oxidoreductase                                     | 32.04 | 355  | MB3583  | oxidoreductase                      | 32.04 | 355  | MV_2241  | oxidoreductase, 2-nitropropane de   | 97.86 | 327  | BCG_3625  | hypothetical protein               | 32.04 | 355  |
| MAP4_0146 | O-methyltransferase                               | 217  | Rv0187  | Probable O-methyltransferase                                | 73.85 | 220  | MB0193  | O-methyltransferase                 | 73.85 | 220  | MV_4992  | O-methyltransferase                 | 99.08 | 217  | BCG_0224  | O-methyltransferase                | 73.85 | 220  |
| MAP4_0147 | hypothetical protein                              | 51   | Rv0186A | Metallothionein, MytN                                       | 79.59 | 51   | MB1238  | long-chain-acyl-CoA synthetase      | 28.57 | 59   | MV_4993  | hypothetical protein                | 100   | 51   | BCG_1266  | long-chain-acyl-CoA synthetase     | 28.57 | 59   |
| MAP4_0148 | beta-glucosidase                                  | 691  | Rv0186  | Probable beta-glucosidase BglS (gen                         | 76.12 | 691  | MB0192  | beta-glucosidase BGLS               | 76.12 | 691  | MV_4994  | glycosyl hydrolase 3                | 99.99 | 705  | BCG_0223  | beta-glucosidase bglS              | 76.12 | 691  |
| MAP4_0149 | hypothetical protein                              | 170  | Rv0185  | hypothetical protein                                        | 80.84 | 169  | MB0191  | hypothetical protein                | 80.84 | 169  | MV_4995  | hypothetical protein                | 99.41 | 170  | BCG_0222  | hypothetical protein               | 80.84 | 169  |
| MAP4_0150 | hypothetical protein                              | 249  | Rv0184  | hypothetical protein                                        | 88.26 | 249  | MB0190  | hypothetical protein                | 88.26 | 249  | MV_4996  | hypothetical protein                | 99.6  | 249  | BCG_0221  | hypothetical protein               | 88.26 | 249  |
| MAP4_0151 | hypophosphite dehydrogenase                       | 477  | Rv0183  | Possible hypophosphite dehydrogenase                        | 82.61 | 379  | MB0189  | hypophosphite dehydrogenase         | 82.61 | 379  | MV_4997  | hypophosphite dehydrogenase         | 99.64 | 477  | BCG_0220  | hypophosphite dehydrogenase        | 82.61 | 379  |
| MAP4_0152 | alternative RNA polymerase sigma factor SigG      | 267  | Rv0182  | Probable alternative RNA polymerase sigma factor            | 80    | 370  | MB0188  | RNA polymerase factor sigma-70      | 80    | 370  | MV_4998  | RNA polymerase factor sigma-70      | 98.78 | 277  | BCG_0219  | RNA polymerase factor sigma-70     | 80    | 370  |
| MAP4_0153 | hypothetical protein                              | 467  | Rv0542  | Possible O-succinylbenzoic acid-CoA ligase                  | 26.21 | 362  | MB0556  | O-succinylbenzoic acid-CoA lig      | 26.21 | 362  | MV_5000  | hypothetical protein                | 98.72 | 467  | BCG_0286  | O-succinylbenzoic acid-CoA lig     | 26.21 | 362  |
| MAP4_0154 | hypothetical protein                              | 277  | Rv0926  | hypothetical protein                                        | 44.13 | 358  | MB0949  | hypothetical protein                | 44.13 | 358  | MV_4999  | dihydrodipicolinate reductase Nre1  | 98.14 | 277  | BCG_0978  | hypothetical protein               | 44.13 | 358  |
| MAP4_0155 | putative transcriptional regulator                | 396  | Rv1719  | Probable transcriptional regulatory p                       | 30.77 | 259  | MB0178  | transcriptional regulator           | 30.77 | 259  | MV_5001  | hypothetical protein                | 98.66 | 296  | BCG_1758  | transcriptional regulatory prot    | 30.77 | 259  |
| MAP4_0156 | hypothetical protein                              | 241  | Rv0181  | hypothetical protein                                        | 72.92 | 244  | MB0187  | hypothetical protein                | 72.92 | 244  | MV_5002  | hypothetical protein                | 97.51 | 241  | BCG_0218  | hypothetical protein               | 72.92 | 244  |
| MAP4_0157 | hypothetical protein                              | 474  | Rv0180  | Probable conserved transmembrane protein                    | 74.12 | 452  | MB0186  | transmembrane protein               | 74.12 | 452  | MV_5003  | ABC transporter                     | 98.31 | 474  | BCG_0217  | hypothetical protein               | 74.12 | 452  |
| MAP4_0158 | lipoprotein                                       | 366  | Rv0179  | Possible lipoprotein LprO                                   | 81.92 | 369  | MB0185  | lipoprotein LPRO                    | 81.92 | 369  | MV_5005  | LprO protein                        | 99.72 | 366  | BCG_0216  | lipoprotein lprO                   | 81.92 | 369  |
| MAP4_0159 | hypothetical protein                              | 221  | Rv3365  | hypothetical protein                                        | 28.79 | 876  | MB3400C | hypothetical protein                | 28.79 | 876  | MV_5004  | hypothetical protein                | 98.64 | 221  | BCG_3437  | hypothetical protein               | 28.79 | 876  |
| MAP4_0160 | mce associated membrane protein                   | 252  | Rv0178  | Probable conserved Mce associated                           | 63.39 | 244  | MB0184  | mce associated membrane pr          | 63.39 | 244  | MV_5006  | hypothetical protein                | 97.22 | 251  | BCG_0215  | MCE associated membrane pr         | 63.39 | 244  |

Table S1 continued

|           |                                                              |     |         |                                                              |       |      |         |                                                  |       |      |          |                                                  |       |     |           |                                                                |       |      |          |                      |      |       |
|-----------|--------------------------------------------------------------|-----|---------|--------------------------------------------------------------|-------|------|---------|--------------------------------------------------|-------|------|----------|--------------------------------------------------|-------|-----|-----------|----------------------------------------------------------------|-------|------|----------|----------------------|------|-------|
| MAP4_0203 | hypothetical protein                                         | 137 | Rv2692  | TRK system potassium uptake                                  | 45    | 220  | Mb0711  | TRK system potassium uptake                      | 45    | 220  | MAM_5143 | response regulator receiver domain               | 97.08 | 153 | BCG_2705  | TRK system potassium uptake                                    | 45    | 220  | MAP3571  | hypothetical protein | 137  | 100   |
| MAP4_0204 | acyl-CoA dehydrogenase                                       | 410 | Rv0154c | Possible acyl-CoA dehydrogenase F                            | 85.61 | 403  | Mb0159c | acyl-CoA dehydrogenase                           | 85.61 | 403  | MAM_5144 | acyl-CoA dehydrogenase                           | 99.51 | 410 | BCG_0190c | acyl-CoA dehydrogenase FadE                                    | 85.61 | 403  | MAP3570  | FadE2                | 137  | 100   |
| MAP4_0207 | short-chain type dehydrogenase reductase                     | 287 | Rv0148  | Possible short-chain type dehydrogenase                      | 87.76 | 286  | Mb0153  | short-chain type dehydrogenase                   | 87.76 | 286  | MAM_5145 | short-chain type dehydrogenase                   | 99.09 | 211 | BCG_0189c | short-chain type dehydrogenase                                 | 87.76 | 286  | MAP3569  | hypothetical protein | 287  | 100   |
| MAP4_0208 | aldehyde dehydrogenase NAD-dependent                         | 489 | Rv0147  | Possible aldehyde dehydrogenase                              | 78.46 | 505  | Mb0152  | aldehyde dehydrogenase                           | 78.46 | 505  | MAM_5147 | aldehyde dehydrogenase                           | 99.03 | 473 | BCG_0183  | aldehyde dehydrogenase                                         | 78.46 | 505  | MAP3566  | hypothetical protein | 489  | 100   |
| MAP4_0209 | putative cell envelope-associated transcriptional attenuator | 516 | Rv3484  | Possible conserved protein CpsA                              | 39.81 | 512  | Mb3514  | hypothetical protein                             | 39.81 | 512  | MAM_5148 | cell envelope-related function                   | 99.03 | 516 | BCG_3548  | hypothetical protein                                           | 39.81 | 512  | MAP3565  | hypothetical protein | 516  | 100   |
| MAP4_0210 | hypothetical protein                                         | 313 | Rv0146  | Possible S-adenosylmethionine-dependent methyltransferase    | 74.76 | 310  | Mb0151  | hypothetical protein                             | 74.76 | 310  | MAM_5149 | methyltransferase, putative, family 10           | 99.03 | 313 | BCG_0182  | hypothetical protein                                           | 74.76 | 310  | MAP3564  | hypothetical protein | 313  | 100   |
| MAP4_0211 | hypothetical protein                                         | 313 | Rv0145  | Possible S-adenosylmethionine-dependent methyltransferase    | 75.16 | 317  | Mb0150  | hypothetical protein                             | 75.16 | 317  | MAM_5150 | methyltransferase, putative, family 10           | 98.72 | 313 | BCG_0181  | hypothetical protein                                           | 75.16 | 317  | MAP3563  | hypothetical protein | 313  | 100   |
| MAP4_0212 | Transcriptional regulator, TetR family                       | 652 | Rv0144  | Possible transcriptional regulator                           | 65.52 | 280  | Mb0149  | TetR family transcriptional regulator            | 65.52 | 280  | MAM_5151 | TetR family transcriptional regulator            | 99.09 | 652 | BCG_0180  | TetR family transcriptional regulator                          | 65.52 | 280  | MAP3562  | hypothetical protein | 652  | 100   |
| MAP4_0213 | conserved hypothetical protein, pfm family                   | 328 | Rv0181c | hypothetical protein                                         | 36.67 | 284  | Mb0178c | hypothetical protein                             | 36.67 | 284  | MAM_5152 | chromatin condensation protein                   | 98.78 | 328 | BCG_0218c | hypothetical protein                                           | 36.67 | 284  | MAP3561  | hypothetical protein | 328  | 100   |
| MAP4_0214 | putative DNA-binding ferritin-like protein                   | 182 | Rv2903c | Possible signal peptidase I LepB (SP)                        | 21.43 | 294  | Mb2972c | signal peptidase I LepB                          | 21.43 | 294  | MAM_5153 | starvation-induced DNA protecting                | 100   | 182 | BCG_2924c | signal peptidase I lepB                                        | 21.43 | 294  | MAP3560  | hypothetical protein | 182  | 100   |
| MAP4_0215 | hypothetical protein                                         | 304 | Rv0142  | hypothetical protein                                         | 81.88 | 308  | Mb0147  | hypothetical protein                             | 81.88 | 308  | MAM_5154 | hypothetical protein                             | 99.67 | 304 | BCG_0178  | hypothetical protein                                           | 81.88 | 308  | MAP3559  | hypothetical protein | 321  | 99.67 |
| MAP4_0216 | hypothetical protein                                         | 133 | Rv0141c | hypothetical protein                                         | 66.14 | 136  | Mb0146c | hypothetical protein                             | 66.14 | 136  | MAM_5155 | hypothetical protein                             | 100   | 133 | BCG_0177c | hypothetical protein                                           | 66.14 | 136  | MAP3558  | hypothetical protein | 132  | 100   |
| MAP4_0217 | hypothetical protein                                         | 126 | Rv0140  | hypothetical protein                                         | 77.24 | 126  | Mb0145  | hypothetical protein                             | 77.24 | 126  | MAM_5156 | hypothetical protein                             | 98.41 | 126 | BCG_0176  | hypothetical protein                                           | 77.24 | 126  | MAP3557  | hypothetical protein | 126  | 100   |
| MAP4_0218 | oxidoreductase                                               | 339 | Rv0139  | Possible oxidoreductase                                      | 81.21 | 340  | Mb0144  | oxidoreductase                                   | 80.91 | 340  | MAM_5157 | beta-hydroxyesteroid dehydrogenase               | 99.41 | 339 | BCG_0175  | oxidoreductase                                                 | 81.21 | 340  | MAP3556  | hypothetical protein | 339  | 100   |
| MAP4_0219 | hypothetical protein                                         | 168 | Rv0138  | hypothetical protein                                         | 75.9  | 167  | Mb0143  | hypothetical protein                             | 75.3  | 167  | MAM_5158 | hypothetical protein                             | 99.4  | 168 | BCG_0174  | hypothetical protein                                           | 75.9  | 167  | MAP3555  | hypothetical protein | 168  | 100   |
| MAP4_0220 | peptide methionine sulfoxide reductase MsrA                  | 471 | Rv0137c | Possible peptidomethionine sulfoxide reductase               | 85.96 | 182  | Mb0142c | methionine sulfoxide reductase                   | 85.96 | 182  | MAM_5159 | methionine sulfoxide reductase A                 | 100   | 471 | BCG_0173c | methionine sulfoxide reductase                                 | 85.96 | 182  | MAP3554  | hypothetical protein | 171  | 100   |
| MAP4_0221 | Cytochrome P450                                              | 139 | Rv0136  | Possible cytochrome P450 138 Cyp18                           | 76.39 | 141  | Mb0141  | cytochrome P450 reductase                        | 76.39 | 141  | MAM_5160 | cytochrome P450 monooxygenase                    | 98.59 | 438 | BCG_0172  | cytochrome p450 138 cyp18                                      | 76.39 | 141  | MAP3553  | hypothetical protein | 439  | 100   |
| MAP4_0222 | Transcriptional regulator, TetR family                       | 200 | Rv0135c | Possible transcriptional regulator                           | 76    | 201  | Mb0140c | transcriptional regulator                        | 76    | 201  | MAM_5161 | TetR family transcriptional regulator            | 100   | 200 | BCG_0171c | transcriptional regulator                                      | 76    | 201  | MAP3552  | hypothetical protein | 200  | 100   |
| MAP4_0223 | hypothetical protein                                         | 489 | Rv1345  | Possible fatty acyl-AMP lyase MshH                           | 32.73 | 521  | Mb1380  | long-chain-fatty-acyl-CoA ligase                 | 32.73 | 521  | MAM_5162 | hypothetical protein                             | 100   | 489 | BCG_1407  | long-chain-fatty-acyl-ACP lyase                                | 32.73 | 521  | MAP3551  | hypothetical protein | 20   | 100   |
| MAP4_0224 | epoxide hydrolase                                            | 296 | Rv0134  | Possible epoxide hydrolase ephB (ep)                         | 41.79 | 305  | Mb1373  | epoxide hydrolase                                | 41.79 | 305  | MAM_5163 | alpha/beta hydrolase                             | 100   | 296 | BCG_0177  | epoxide hydrolase ephB                                         | 41.79 | 305  | MAP3550  | epH                  | 296  | 100   |
| MAP4_0225 | hypothetical protein                                         | 409 | Rv3529c | hypothetical protein                                         | 30.35 | 384  | Mb3559c | hypothetical protein                             | 30.35 | 384  | MAM_5164 | hypothetical protein                             | 98.78 | 409 | BCG_3593c | hypothetical protein                                           | 30.35 | 384  | MAP3549  | hypothetical protein | 386  | 100   |
| MAP4_0226 | Transcriptional regulator, TetR family                       | 191 | Rv3167c | Possible transcriptional regulator                           | 49.19 | 208  | Mb3167c | TetR family transcriptional regulator            | 49.19 | 208  | MAM_5165 | TetR family transcriptional regulator            | 98.94 | 189 | BCG_3191c | TetR family transcriptional regulator                          | 49.19 | 208  | MAP3548  | hypothetical protein | 226  | 100   |
| MAP4_0227 | hypothetical protein                                         | 366 | Rv3531c | hypothetical protein                                         | 27.45 | 375  | Mb3531c | hypothetical protein                             | 27.45 | 375  | MAM_5166 | hypothetical protein                             | 99.46 | 375 | BCG_3595c | hypothetical protein                                           | 27.45 | 375  | MAP3547c | hypothetical protein | 370  | 100   |
| MAP4_0228 | fatty acyl desaturase                                        | 366 | Rv329c  | Possible linoleoyl-CoA desaturase (d)                        | 47.91 | 427  | Mb329c  | linoleoyl-CoA desaturase                         | 47.91 | 427  | MAM_5167 | fatty acyl desaturase                            | 99.18 | 366 | BCG_3297  | linoleoyl-CoA desaturase                                       | 47.91 | 427  | MAP3546  | DesA_2               | 366  | 100   |
| MAP4_0229 | putative oxidoreductase                                      | 374 | Rv3230c | hypothetical oxidoreductase                                  | 35.29 | 387  | Mb3230c | oxidoreductase                                   | 35.29 | 387  | MAM_5168 | oxidoreductase FAD-binding subunit               | 98.63 | 374 | BCG_3260c | oxidoreductase                                                 | 35.29 | 387  | MAP3545  | hypothetical protein | 364  | 100   |
| MAP4_0230 | Transcriptional regulator, TetR family                       | 224 | Rv0767c | hypothetical protein                                         | 35.48 | 213  | Mb0790c | hypothetical protein                             | 35.48 | 213  | MAM_5169 | TetR family transcriptional regulator            | 99.07 | 215 | BCG_0819c | hypothetical protein                                           | 35.48 | 213  | MAP3544c | hypothetical protein | 290  | 99.55 |
| MAP4_0231 | hypothetical protein                                         | 117 | Rv0719  | S05 ribosomal protein L6 RplP                                | 25.27 | 179  | Mb0740  | S05 ribosomal protein L6                         | 25.27 | 179  | MAM_5170 | hypothetical protein                             | 99.07 | 107 | BCG_0769  | S05 ribosomal protein L6                                       | 25.27 | 179  | MAP3543  | hypothetical protein | 117  | 100   |
| MAP4_0232 | acetyltransferase                                            | 200 | Rv0133  | Acetyltransferase N acetyltransferase                        | 70.62 | 201  | Mb0133  | acetyltransferase                                | 70.62 | 201  | MAM_5171 | acetyltransferase, great family protein          | 99.07 | 200 | BCG_0768  | acetyltransferase                                              | 70.62 | 201  | MAP3542  | hypothetical protein | 200  | 100   |
| MAP4_0233 | F420-dependent glucose-6-phosphate dehydrogenase             | 403 | Rv0132c | Putative F420-dependent glucose-6-phosphate dehydrogenase    | 74.1  | 360  | Mb0132c | F420-dependent glucose-6-phosphate dehydrogenase | 74.1  | 360  | MAM_5172 | F420-dependent glucose-6-phosphate dehydrogenase | 99.05 | 402 | BCG_0166c | F420-dependent glucose-6-phosphate dehydrogenase               | 74.1  | 360  | MAP3541c | hypothetical protein | 376  | 99.72 |
| MAP4_0234 | F420-dependent glucose-6-phosphate dehydrogenase             | 233 | Rv0131  | Putative F420-dependent glucose-6-phosphate dehydrogenase    | 40.43 | 292  | Mb0122  | F420-dependent glucose-6-phosphate dehydrogenase | 40.43 | 292  | MAM_5172 | F420-dependent glucose-6-phosphate dehydrogenase | 99.57 | 622 | BCG_0165c | 3-ketosteroid-delta-1-delta-3-hydroxysteroid-5-alpha-reductase | 31.58 | 563  | MAP3540c | hypothetical protein | 233  | 100   |
| MAP4_0235 | acyl-CoA dehydrogenase FadE1                                 | 449 | Rv0131c | Possible acyl-CoA dehydrogenase F                            | 90.16 | 447  | Mb0136c | acyl-CoA dehydrogenase                           | 90.16 | 447  | MAM_5173 | acyl-CoA dehydrogenase                           | 99.54 | 441 | BCG_0165c | acyl-CoA dehydrogenase FadE1                                   | 90.16 | 447  | MAP3539c | FadE1_3              | 449  | 100   |
| MAP4_0236 | hypothetical protein                                         | 151 | Rv0130  | Possible 3-hydroxythioester dehydrogenase                    | 10.67 | 151  | Mb0135  | hypothetical protein                             | 10.67 | 151  | MAM_5174 | ZhpA protein                                     | 100   | 151 | BCG_0164  | hypothetical protein                                           | 10.67 | 151  | MAP3538  | hypothetical protein | 151  | 100   |
| MAP4_0237 | hypothetical protein                                         | 278 | Rv0129  | hypothetical protein                                         | 27.54 | 262  | Mb0129  | hypothetical protein                             | 27.54 | 262  | MAM_5175 | beta-hydroxyesteroidase BPO_4                    | 99.49 | 278 | BCG_0163  | hypothetical protein                                           | 27.54 | 262  | MAP3537  | BpoC_1               | 278  | 100   |
| MAP4_0238 | hypothetical protein                                         | 133 | Rv1256c | Possible phospho-N-acetylmuramoyl-L-alanine aminotransferase | 28.3  | 133  | Mb1290c | hypothetical protein                             | 28.3  | 133  | MAM_5176 | hypothetical protein                             | 100   | 133 | BCG_2173c | phospho-N-acetylmuramoyl-L-alanine aminotransferase            | 28.3  | 133  | MAP3540c | hypothetical protein | 80.3 | 45.16 |
| MAP4_0239 | hypothetical protein                                         | 100 | Rv1640c | Lysyl-RNA synthetase 2 LysX                                  | 62.5  | 1172 | Mb1667c | Lysyl-RNA synthetase                             | 62.5  | 1172 | MAM_5177 | hypothetical protein                             | 98.5  | 133 | BCG_1679c | Lysyl-RNA synthetase                                           | 62.5  | 1172 | MAP3536  | hypothetical protein | 133  | 100   |
| MAP4_0240 | hypothetical protein                                         | 100 | Rv1795A | hypothetical protein                                         | 66.28 | 89   | Mb1795A | hypothetical protein                             | 66.28 | 89   | MAM_5178 | hypothetical protein                             | 100   | 100 | BCG_0227  | hypothetical protein                                           | 40.68 | 96   | MAP3535  | hypothetical protein | 100  | 100   |
| MAP4_0241 | hypothetical protein                                         | 184 | Rv3203  | Possible lipase LipV                                         | 33.33 | 224  | Mb3228  | lipase LipV                                      | 33.33 | 224  | MAM_5179 | hypothetical protein                             | 98.86 | 175 | BCG_3229  | lipase lipV                                                    | 33.33 | 224  | MAP3534c | hypothetical protein | 184  | 100   |
| MAP4_0242 | Transcriptional regulator, MarR family                       | 155 | Rv1333  | Possible transcriptional regulator                           | 25.97 | 344  | Mb1333  | hypothetical protein                             | 25.97 | 344  | MAM_5180 | MarR family transcriptional regulator            | 99.54 | 137 | BCG_1296  | hypothetical protein                                           | 25.97 | 344  | MAP3533c | hypothetical protein | 262  | 33.8  |
| MAP4_0243 | ABC transporter, ATP-binding component                       | 420 | Rv2961  | Dauronubicin-DIM-transport ATP-B                             | 42.04 | 311  | Mb2961  | dauronubicin-DIM-transport ATP-B                 | 42.04 | 311  | MAM_5181 | dauronubicin-ABC transporter ATP-B               | 98.21 | 280 | BCG_2958  | dauronubicin-DIM-transport ATP-B                               | 42.04 | 311  | MAP3532c | hypothetical protein | 387  | 100   |
| MAP4_0244 | putative ABC-2 type transporter, membrane protein            | 315 | Rv2938  | Possible dauronubicin-DIM-transport ATP-B                    | 24.39 | 276  | Mb2963  | dauronubicin-DIM-transport ATP-B                 | 24.39 | 276  | MAM_5182 | putative ABC transporter membrane protein        | 97.05 | 272 | BCG_2960  | dauronubicin-DIM-transport ATP-B                               | 24.39 | 276  | MAP3532c | hypothetical protein | 315  | 100   |
| MAP4_0245 | secreted fibronectin-binding protein C anti-85-C FbpC        | 85  | Rv0129c | Secreted antigen 85-C FbpC (BSC5) A                          | 85.28 | 340  | Mb0134c | secreted antigen 85-C FbpC                       | 85.28 | 340  | MAM_5183 | antigen 85-C                                     | 99.72 | 355 | BCG_0163c | hypothetical protein                                           | 85.28 | 340  | MAP3531c | FbpC2                | 352  | 100   |
| MAP4_0246 | hypothetical protein                                         | 228 | Rv0128  | Possible conserved transmembrane protein                     | 72.69 | 259  | Mb0133  | transmembrane protein                            | 72.69 | 259  | MAM_5184 | hypothetical protein                             | 100   | 228 | BCG_0162c | hypothetical protein                                           | 72.69 | 259  | MAP3530  | hypothetical protein | 228  | 100   |
| MAP4_0247 | hypothetical protein                                         | 452 | Rv0127  | Maltotriase MaltA                                            | 70.37 | 455  | Mb0132  | hypothetical protein                             | 70.37 | 455  | MAM_5185 | alpha-glucosylase                                | 99.34 | 452 | BCG_0161c | alpha-glucosylase                                              | 70.37 | 455  | MAP3529  | hypothetical protein | 509  | 100   |
| MAP4_0248 | trehalase                                                    | 590 | Rv0126  | Trehalase synthase TreS                                      | 90.82 | 601  | Mb0131  | trehalase synthase TreS                          | 90.82 | 601  | MAM_5186 | trehalase                                        | 100   | 590 | BCG_0160  | trehalase                                                      | 90.82 | 601  | MAP3528  | hypothetical protein | 590  | 100   |
| MAP4_0249 | serine protease PeaP                                         | 361 | Rv0125  | Possible serine protease PeaP (ser)                          | 70.17 | 355  | Mb0130  | serine protease PeaP                             | 70.17 | 355  | MAM_5187 | trypsin                                          | 99.72 | 371 | BCG_0159  | serine protease peaP                                           | 70.17 | 355  | MAP3527  | PeaP                 | 361  | 100   |
| MAP4_0250 | hypothetical protein                                         | 145 | Rv0121c | hypothetical protein                                         | 67.13 | 144  | Mb0126c | hypothetical protein                             | 67.13 | 144  | MAM_5188 | phosphoxime 5'-phosphate oxidase                 | 100   | 145 | BCG_0155c | hypothetical protein                                           | 67.13 | 144  | MAP3526c | hypothetical protein | 145  | 100   |
| MAP4_0251 | transcription elongation factor G FusA2                      | 87  | Rv0120c | Possible elongation factor G FusA2                           | 87.62 | 714  | Mb0124c | elongation factor G                              | 87.62 | 714  | MAM_5189 | elongation factor G                              | 99.58 | 720 | BCG_0154c | elongation factor G                                            | 87.62 | 714  | MAP3525c | elongation factor G  | 745  | 100   |
| MAP4_0252 | acyl-CoA ligase FadD7                                        | 529 | Rv0119  | Possible fatty-acyl-CoA ligase FadD7                         | 20.84 | 525  | Mb0123  | acyl-CoA synthetase                              | 2     |      |          |                                                  |       |     |           |                                                                |       |      |          |                      |      |       |

Table S1 continued

|           |                                                                    |     |         |                                                              |       |     |          |                                    |       |     |         |                                          |       |     |           |                                    |       |     |          |                                       |     |       |
|-----------|--------------------------------------------------------------------|-----|---------|--------------------------------------------------------------|-------|-----|----------|------------------------------------|-------|-----|---------|------------------------------------------|-------|-----|-----------|------------------------------------|-------|-----|----------|---------------------------------------|-----|-------|
| MAP4_0302 | putative oxidoreductase                                            | 215 | Rv3368c | putative oxidoreductase                                      | 80    | 214 | Mv03403c | oxidoreductase                     | 80    | 214 | Mv03434 | nitroreductase                           | 80    | 215 | BCG_3440c | oxidoreductase                     | 80    | 214 | Mv03475c | hypothetical protein                  | 115 | 100   |
| MAP4_0303 | RNA/RNA methylase SpoU                                             | 154 | Rv3366  | Probable RNA/RNA methylase SpoU                              | 84.31 | 154 | Mb3401   | RNA/RNA methylase SpoU             | 84.31 | 154 | Mv03433 | RNA methyltransferase, TrmT family       | 99.35 | 154 | BCG_3438  | RNA/RNA methylase spoU             | 84.31 | 154 | Mv03474  | hypothetical protein                  | 215 | 100   |
| MAP4_0304 | putative methyltransferase                                         | 200 | Rv3369  | Probable methyltransferase/methylase                         | 67.61 | 200 | Mb3402   | methyltransferase/methylase        | 67.61 | 200 | Mv03432 | RNA-dependent methyltransferase          | 99.35 | 201 | BCG_3437  | methyltransferase/methylase        | 67.61 | 200 | Mv03473  | hypothetical protein                  | 201 | 100   |
| MAP4_0305 | hypothetical protein                                               | 94  | Rv3365c | hypothetical protein                                         | 67.61 | 94  | Mb3400   | hypothetical protein               | 67.61 | 94  | Mv03431 | hypothetical protein                     | 97.36 | 94  | BCG_3436  | hypothetical protein               | 67.61 | 94  | Mv03472  | hypothetical protein                  | 94  | 100   |
| MAP4_0306 | hypothetical protein                                               | 104 | Rv3364d | hypothetical protein                                         | 90.4  | 130 | Mb3399   | hypothetical protein               | 90.4  | 130 | Mv03430 | radB/CLK7 domain-contain pr              | 99.29 | 100 | BCG_3435c | hypothetical protein               | 90.4  | 130 | Mv03471  | hypothetical protein                  | 104 | 100   |
| MAP4_0307 | hypothetical protein                                               | 124 | Rv3363c | hypothetical protein                                         | 75.22 | 122 | Mb3398   | hypothetical protein               | 75.22 | 122 | Mv03429 | hypothetical protein                     | 99.19 | 124 | BCG_3435c | hypothetical protein               | 75.22 | 122 | Mv03470  | hypothetical protein                  | 124 | 100   |
| MAP4_0308 | ATP/GTP-binding protein                                            | 195 | Rv3362c | Probable ATP/GTP-binding protein                             | 84.97 | 193 | Mb3397c  | ATP/GTP-binding protein            | 84.97 | 193 | Mv03428 | ATP/GTP-binding protein                  | 100   | 195 | BCG_3434c | ATP/GTP-binding protein            | 84.97 | 193 | Mv03469c | hypothetical protein                  | 195 | 100   |
| MAP4_0309 | hypothetical protein                                               | 117 | Rv3361c | hypothetical protein                                         | 55.49 | 118 | Mb3396   | hypothetical protein               | 55.49 | 118 | Mv03427 | hypothetical protein                     | 74.73 | 117 | BCG_3433c | hypothetical protein               | 55.49 | 118 | Mv03468  | hypothetical protein                  | 117 | 100   |
| MAP4_0310 | transposase, $\phi$ -family protein                                | 537 | Rv3360  | Possible transposase                                         | 25.95 | 234 | Mb3318   | transposase                        | 25.95 | 234 | Mv03426 | transposase                              | 99.31 | 537 | BCG_3432  | transposase                        | 25.95 | 234 | Mv03467  | hypothetical protein                  | 537 | 100   |
| MAP4_0311 | conserved transmembrane ABC transporter ATP-binding protein ABC tr | 817 | Rv1747  | Probable conserved transmembrane ABC transporter ATP-binding | 62.18 | 865 | Mb1776   | ABC transporter ATP-binding        | 62.18 | 865 | Mv03425 | ABC transporter ATP-binding protein      | 99.14 | 812 | BCG_1786  | transmembrane ABC transport        | 62.18 | 865 | Mv03466  | hypothetical protein                  | 827 | 99.88 |
| MAP4_0312 | conserved transmembrane ABC transporter ATP-binding protein ABC tr | 873 | Rv1747  | Probable conserved transmembrane ABC transporter ATP-binding | 62.56 | 865 | Mb1776   | ABC transporter ATP-binding        | 62.56 | 865 | Mv03425 | ABC transporter ATP-binding protein      | 99.65 | 846 | BCG_1786  | transmembrane ABC transport        | 62.56 | 865 | Mv03465  | hypothetical protein                  | 873 | 100   |
| MAP4_0313 | oxidoreductase                                                     | 405 | Rv3359  | Possible oxidoreductase                                      | 83.97 | 396 | Mb3394   | oxidoreductase                     | 83.97 | 396 | Mv03424 | oxidoreductase, FAD/FMN-binding          | 99.01 | 405 | BCG_3431  | oxidoreductase                     | 83.97 | 396 | Mv03464  | hypothetical protein                  | 405 | 100   |
| MAP4_0314 | bifunctional methylene tetra hydrofolate dehydrogenase             | 281 | Rv3356c | Probable bifunctional protein FdhD                           | 92.53 | 281 | Mb3391c  | bifunctional 5,10-methylene- tetra | 92.53 | 281 | Mv03423 | bifunctional 5,10-methylene-tetra        | 99.29 | 281 | BCG_3429  | bifunctional 5,10-methylene-tetra  | 92.53 | 281 | Mv03463  | hypothetical protein                  | 281 | 100   |
| MAP4_0315 | hypothetical protein                                               | 98  | Rv3355c | Probable integral membrane protein                           | 78.35 | 97  | Mb3390   | hypothetical protein               | 78.35 | 97  | Mv03422 | hypothetical protein                     | 98.92 | 98  | BCG_3427c | hypothetical protein               | 78.35 | 97  | Mv03462  | hypothetical protein                  | 98  | 100   |
| MAP4_0316 | hypothetical protein                                               | 167 | Rv3354  | hypothetical protein                                         | 51.59 | 129 | Mb3389   | hypothetical protein               | 51.59 | 129 | Mv03421 | hypothetical protein                     | 100   | 167 | BCG_3426  | hypothetical protein               | 51.59 | 129 | Mv03461  | hypothetical protein                  | 203 | 99.4  |
| MAP4_0317 | REP13E12 repeat protein                                            | 462 | Rv1702c | Probable REP13E12 repeat protein                             | 65.34 | 454 | Mb1728c  | hypothetical protein               | 65.34 | 454 | Mv03420 | hypothetical protein                     | 92.81 | 447 | BCG_1740c | hypothetical protein               | 65.34 | 454 | Mv03460  | hypothetical protein                  | 462 | 99.78 |
| MAP4_0318 | methyltransferase/methylase                                        | 243 | Rv3342  | Possible methyltransferase [methyl                           | 85.19 | 243 | Mb3374   | methyltransferase                  | 85.19 | 243 | Mv03417 | methyltransferase                        | 99.59 | 243 | BCG_3412  | methyltransferase                  | 85.19 | 243 | Mv03459  | hypothetical protein                  | 243 | 100   |
| MAP4_0319 | homoserine O-acetyltransferase                                     | 392 | Rv3341  | Probable homoserine O-acetyltransferase                      | 81.91 | 379 | Mb3373   | homoserine O-acetyltransferase     | 81.91 | 379 | Mv03416 | homoserine O-acetyltransferase           | 99.74 | 392 | BCG_3411  | homoserine O-acetyltransferase     | 81.91 | 379 | Mv03458  | hypothetical protein                  | 392 | 100   |
| MAP4_0320 | O-acetylhomoserine sulphydrylase MetC                              | 456 | Rv3340  | Probable O-acetylhomoserine sulphy                           | 89.04 | 449 | Mb3372   | O-acetylhomoserine aminocar        | 89.04 | 449 | Mv03415 | O-acetylhomoserine aminocarboxy          | 99.78 | 456 | BCG_3410  | O-acetylhomoserine aminocarboxy    | 89.04 | 449 | Mv03457  | hypothetical protein                  | 456 | 100   |
| MAP4_0321 | hypothetical protein                                               | 82  | Rv3373c | Probable acyl-CoA dehydrogenase F                            | 33.96 | 711 | Mb3604c  | acyl-CoA dehydrogenase             | 33.96 | 711 | Mv03414 | hypothetical protein                     | 98.7  | 711 | BCG_3638c | acyl-CoA dehydrogenase FadE        | 33.96 | 711 | Mv03492  | Fad34                                 | 377 | 32.08 |
| MAP4_0322 | isocitrate dehydrogenase Icd2                                      | 745 | Rv0066c | Probable isocitrate dehydrogenase I                          | 84.68 | 745 | Mb0067c  | isocitrate dehydrogenase           | 84.68 | 745 | Mv03413 | isocitrate dehydrogenase, NADP-d         | 99.87 | 745 | BCG_0097c | isocitrate dehydrogenase           | 84.68 | 745 | Mv03456  | Icd2                                  | 745 | 100   |
| MAP4_0323 | isocitrate dehydrogenase Icd1                                      | 412 | Rv3393c | Probable isocitrate dehydrogenase I                          | 88.48 | 409 | Mb3371c  | isocitrate dehydrogenase           | 88.48 | 409 | Mv03412 | isocitrate dehydrogenase                 | 99.27 | 412 | BCG_3409c | isocitrate dehydrogenase           | 88.48 | 409 | Mv03455  | isocitrate dehydrogenase              | 412 | 100   |
| MAP4_0324 | putative hydrolase, alpha-beta fold family protein                 | 284 | Rv3338  | hypothetical protein                                         | 75.36 | 214 | Mb3370   | hypothetical protein               | 75.36 | 214 | Mv03411 | alpha-beta hydrolase                     | 98.49 | 284 | BCG_3408  | hypothetical protein               | 75.36 | 214 | Mv03454  | hypothetical protein                  | 284 | 100   |
| MAP4_0325 | tryptophanyl-tRNA synthetase                                       | 343 | Rv3336c | Probable tryptophanyl-tRNA synthetase                        | 86.43 | 336 | Mb3369c  | tryptophanyl-tRNA synthetase       | 86.43 | 336 | Mv03410 | tryptophanyl-tRNA synthetase             | 99.71 | 343 | BCG_3407c | tryptophanyl-tRNA synthetase       | 86.43 | 336 | Mv03453  | hypothetical protein                  | 343 | 100   |
| MAP4_0326 | putative conserved membrane protein                                | 67  | Rv3335c | Probable conserved integral memb                             | 67.86 | 289 | Mb3368c  | hypothetical protein               | 67.86 | 289 | Mv03409 | hypothetical protein                     | 29.46 | 324 | BCG_3406c | integral membrane protein          | 67.86 | 289 | Mv03452  | hypothetical protein                  | 67  | 100   |
| MAP4_0327 | small multidrug resistance protein                                 | 104 | Rv3065  | Multidrug-transport integral memb                            | 30.68 | 107 | Mv03092  | multidrug-transport integral memb  | 30.68 | 107 | Mv03408 | multidrug resistance protein, SMR        | 100   | 104 | BCG_3000  | multidrug-transport integral memb  | 30.68 | 107 | Mv03451  | SugI                                  | 129 | 100   |
| MAP4_0329 | sugar-transport resistance protein SugI                            | 450 | Rv3331  | Probable sugar-transport integral memb                       | 69.47 | 502 | Mb3364   | sugar-transport integral memb      | 69.47 | 502 | Mv03406 | sugar-transport, major facilitator super | 99.11 | 450 | BCG_3401  | sugar-transport integral memb      | 69.03 | 497 | Mv03449  | SugI                                  | 450 | 100   |
| MAP4_0330 | D-alanyl-D-alanine carboxypeptidase                                | 394 | Rv3329  | Probable penicillin-binding protein Dac                      | 82.28 | 405 | Mb3363   | penicillin-binding protein Dac     | 82.28 | 405 | Mv03405 | D-alanyl-D-alanine carboxypeptidase      | 99.28 | 394 | BCG_3400  | penicillin-binding protein DacB    | 82.28 | 405 | Mv03448  | hypothetical protein                  | 394 | 100   |
| MAP4_0332 | aminotransferase                                                   | 437 | Rv3329  | Probable aminotransferase                                    | 43.49 | 438 | Mb3362   | aminotransferase                   | 43.49 | 438 | Mv03404 | aminotransferase                         | 99.31 | 437 | BCG_3398  | aminotransferase                   | 43.49 | 438 | Mv03447  | hypothetical protein                  | 437 | 100   |
| MAP4_0333 | RNA polymerase sigma factor SigI                                   | 295 | Rv3328c | Probable alternative RNA polymera                            | 79.79 | 312 | Mb3361   | RNA polymerase sigma factor        | 79.79 | 312 | Mv03403 | RNA polymerase sigma factor SigI         | 99.31 | 318 | BCG_3398c | RNA polymerase sigma factor SigI   | 79.79 | 312 | Mv03446  | RNA polymerase sigma factor SigI      | 295 | 100   |
| MAP4_0334 | hypothetical protein                                               | 252 | Rv3327  | Probable transposase fusion protei                           | 73.06 | 570 | Mb3360   | transposase                        | 73.06 | 570 | Mv03402 | transposase                              | 98.53 | 204 | BCG_3397  | transposase fusion protein         | 73.06 | 570 | Mv03445  | hypothetical protein                  | 252 | 100   |
| MAP4_0335 | succinate dehydrogenase iron-sulfur protein subunit S              | 267 | Rv3319  | Probable succinate dehydrogenase I                           | 90.64 | 263 | Mb3348   | succinate dehydrogenase iron-sulfu | 90.64 | 263 | Mv03400 | succinate dehydrogenase iron-sulfu       | 99.63 | 267 | BCG_3385  | succinate dehydrogenase iron-sulfu | 90.64 | 263 | Mv03444  | succinate dehydrogenase iron-sulfu su | 267 | 100   |
| MAP4_0336 | succinate dehydrogenase flavoprotein subunit SdhA                  | 584 | Rv3319  | Probable succinate dehydrogenase I                           | 93.75 | 580 | Mb3348   | succinate dehydrogenase flavoprot  | 93.75 | 580 | Mv03400 | succinate dehydrogenase flavoprot        | 100   | 584 | BCG_3385  | succinate dehydrogenase flavoprot  | 93.75 | 580 | Mv03443  | succinate dehydrogenase flavoprotein  | 584 | 100   |
| MAP4_0337 | succinate dehydrogenase hydrophobic membrane subunit SdhB          | 154 | Rv3317  | Probable succinate dehydrogenase I                           | 87.34 | 144 | Mb3346   | succinate dehydrogenase hydropho   | 87.34 | 144 | Mv03399 | succinate dehydrogenase hydropho         | 99.36 | 156 | BCG_3383  | succinate dehydrogenase hydropho   | 87.34 | 144 | Mv03442  | hypothetical protein                  | 156 | 100   |
| MAP4_0338 | succinate dehydrogenase cytochrome B-556 subunit S                 | 119 | Rv3316  | Probable succinate dehydrogenase I                           | 84.82 | 112 | Mb3345   | succinate dehydrogenase cyt        | 84.82 | 112 | Mv03397 | succinate dehydrogenase, cytochr         | 98.11 | 112 | BCG_3382  | succinate dehydrogenase cyto       | 84.82 | 112 | Mv03441  | hypothetical protein                  | 119 | 100   |
| MAP4_0339 | cytidine deaminase                                                 | 133 | Rv3315c | Probable cytidine deaminase Cdd (c                           | 78.03 | 133 | Mb3344c  | cytidine deaminase                 | 78.03 | 133 | Mv03396 | cytidine deaminase                       | 99.25 | 133 | BCG_3381c | cytidine deaminase                 | 78.03 | 133 | Mv03440  | cytidine deaminase                    | 133 | 100   |
| MAP4_0340 | thymidine phosphorylase                                            | 427 | Rv3314c | Probable thymidine phosphorylase                             | 82.7  | 427 | Mb3343c  | thymidine phosphorylase            | 82.7  | 427 | Mv03395 | thymidine phosphorylase                  | 98.59 | 427 | BCG_3380c | thymidine phosphorylase            | 82.7  | 427 | Mv03439c | thymidine phosphorylase               | 427 | 100   |
| MAP4_0341 | adenosine deaminase                                                | 366 | Rv3313c | Probable adenosine deaminase Ado                             | 84.15 | 365 | Mb3342c  | adenosine deaminase                | 84.15 | 365 | Mv03394 | adenosine deaminase                      | 100   | 366 | BCG_3379c | adenosine deaminase                | 84.15 | 365 | Mv03438  | adenosine deaminase                   | 366 | 100   |
| MAP4_0342 | hypothetical protein                                               | 280 | Rv3308  | hypothetical protein                                         | 25.97 | 358 | Mb3317   | DNA integrase scanning protei      | 25.97 | 358 | Mv03393 | DNA integrase scanning protei            | 31.25 | 280 | BCG_3378  | DNA integrase scanning protei      | 25.97 | 358 | Mv03437  | hypothetical protein                  | 280 | 100   |
| MAP4_0343 | hypothetical protein                                               | 231 | Rv3401  | hypothetical protein                                         | 30.88 | 786 | Mb3434   | hypothetical protein               | 30.88 | 786 | Mv03227 | hypothetical protein                     | 28.05 | 207 | BCG_3471  | hypothetical protein               | 30.88 | 786 | Mv03436  | hypothetical protein                  | 231 | 100   |
| MAP4_0344 | hypothetical protein                                               | 335 | Rv1484  | Probable membrane protein                                    | 64.07 | 335 | Mb3117   | hypothetical protein               | 64.07 | 335 | Mv03290 | hypothetical protein                     | 98.81 | 335 | BCG_1543  | hypothetical protein               | 64.07 | 335 | Mv03435  | hypothetical protein                  | 335 | 100   |
| MAP4_0345 | hypothetical protein                                               | 337 | Rv1481  | Probable membrane protein                                    | 57.44 | 335 | Mb3117   | hypothetical protein               | 57.44 | 335 | Mv03297 | hypothetical protein                     | 56.29 | 335 | BCG_1543  | hypothetical protein               | 57.44 | 335 | Mv03434  | hypothetical protein                  | 330 | 99.69 |
| MAP4_0346 | hypothetical protein                                               | 437 | Rv3311  | hypothetical protein                                         | 74.31 | 430 | Mb3316   | hypothetical protein               | 74.31 | 430 | Mv03296 | hypothetical protein                     | 99.31 | 437 | BCG_3376  | hypothetical protein               | 74.31 | 430 | Mv03433  | hypothetical protein                  | 437 | 100   |
| MAP4_0347 | putative acid phosphatase                                          | 80  | Rv3310  | Probable acid phosphatase (acid phospho                      | 70.87 | 299 | Mb3318   | acid phosphatase                   | 70.87 | 299 | Mv03287 | acid phosphatase                         | 98.91 | 276 | BCG_3375  | acid phosphatase                   | 70.87 | 299 | Mv03432  | hypothetical protein                  | 300 | 100   |
| MAP4_0348 | uracil phosphoribosyltransferase Upp                               | 257 | Rv3309c | Probable uracil phosphoribosyltran                           | 77.18 | 207 | Mv0285   | uracil phosphoribosyltransferase   | 77.18 | 207 | Mv0285  | uracil phosphoribosyltransferase         | 99.22 | 803 | BCG_3374c | uracil phosphoribosyltransferase   | 77.18 | 207 | Mv03431  | uracil phosphoribosyltransferase      | 257 | 100   |
| MAP4_0349 | phosphotransferase Pmm8                                            | 276 | Rv3308  | Probable phosphotransferase Pmm                              | 74.34 | 534 | Mb3336   | phosphotransferase/phosphom        | 74.34 | 534 | Mv02884 | phosphotransferase/phosphom              | 99.05 | 526 | BCG_3373  | phosphotransferase/phosphom        | 74.34 | 534 | Mv03430  | Pmm8                                  | 276 | 100   |
| MAP4_0350 | purine nucleoside phosphorylase                                    | 521 | Rv3307  | Probable purine nucleoside phosphory                         | 82.09 | 268 | Mb3335   | purine nucleoside phosphorylase    | 82.09 | 268 | Mv02884 | purine nucleoside phosphorylase          | 99.26 | 271 | BCG_3372  | purine nucleoside phosphorylase    | 82.09 | 268 | Mv03429  | purine nucleoside phosphorylase       | 521 | 100   |
| MAP4_0351 | adenosine precursor                                                | 242 | Rv3451  | Probable adenosine precursor Cud3</                          |       |     |          |                                    |       |     |         |                                          |       |     |           |                                    |       |     |          |                                       |     |       |

# Table S1 continued

|           |                                                        |       |         |                                                     |       |     |         |                                                     |       |     |            |                                                     |       |     |           |                                                     |       |     |          |                                      |      |       |
|-----------|--------------------------------------------------------|-------|---------|-----------------------------------------------------|-------|-----|---------|-----------------------------------------------------|-------|-----|------------|-----------------------------------------------------|-------|-----|-----------|-----------------------------------------------------|-------|-----|----------|--------------------------------------|------|-------|
| MAP4_0402 | dTDP-6-deoxy-L-lyxo-4-hexulose reductase RmlD          | 307   | Rv3266c | dTDP-6-deoxy-L-lyxo-4-hexulose reductase            | 72.55 | 304 | Mb3294c | dTDP-phosphate modification                         | 72.88 | 304 | MAY 4231   | dTDP-4-dehydroammoniose reductase                   | 98.68 | 302 | BCG_3295c | dTDP-phosphate modification                         | 72.88 | 304 | MAY3380c | RmlD                                 | 307  | 100   |
| MAP4_0403 | dTDP-Rha-a-D-GlcNAc-diphosphoryl polyuronate-3-L-r     | 288   | Rv3265c | dTDP-Rha-a-D-GlcNAc-diphosphoryl                    | 82.06 | 301 | Mb3293c | dTDP-Rha-a-D-GlcNAc-diphosphoryl                    | 83.16 | 297 | MAY 4230   | dTDP-Rha-a-D-GlcNAc-diphosphoryl                    | 99.65 | 291 | BCG_3294c | dTDP-Rha-a-D-GlcNAc-diphosphoryl                    | 83.16 | 297 | MAY3379c | fbvld                                | 288  | 100   |
| MAP4_0404 | D-3-phospho-D-mannose-1-phosphatransferase             | 358   | Rv3272c | D-3-phospho-D-mannose-1-phosphatransferase          | 87.47 | 359 | Mb3292c | D-3-phospho-D-mannose-1-phosphatransferase          | 87.47 | 359 | MAY 4227   | D-3-phospho-D-mannose-1-phosphatransferase          | 98.72 | 358 | BCG_3293c | D-3-phospho-D-mannose-1-phosphatransferase          | 87.47 | 359 | MAY3378c | RmlD                                 | 358  | 100   |
| MAP4_0405 | putative pyruvate, nucleic family protein, putative    | 176   | Rv3271c | putative pyruvate, nucleic family protein, putative | 86.05 | 173 | Mb3291c | putative pyruvate, nucleic family protein, putative | 86.05 | 173 | MAY 4226   | putative pyruvate, nucleic family protein, putative | 98.89 | 180 | BCG_3292c | putative pyruvate, nucleic family protein, putative | 86.05 | 173 | MAY3377c | hypothetical protein                 | 177  | 99.44 |
| MAP4_0406 | DNA methylase                                          | 526   | Rv3263c | Probable DNA methylase (modificat                   | 76.37 | 553 | Mb3291c | DNA methylase                                       | 76.37 | 553 | MAY 4227   | Bpm1 methyltransferase                              | 99.05 | 526 | BCG_3292  | DNA methylase                                       | 76.37 | 553 | MAY3376c | hypothetical protein                 | 526  | 100   |
| MAP4_0407 | F420 biosynthesis protein FbA4                         | 449   | Rv3262c | Probable F420 biosynthesis protein                  | 84.68 | 448 | Mb3290  | F420-O-gamma-glutamyl ligase                        | 84.68 | 448 | MAY 4225   | F420-O-gamma-glutamyl ligase                        | 99.33 | 449 | BCG_3291  | F420-O-gamma-glutamyl ligase                        | 84.68 | 448 | MAY3375c | hypothetical protein                 | 449  | 100   |
| MAP4_0408 | F420 biosynthesis protein FbA3                         | 437   | Rv3261c | Probable F420 biosynthesis protein                  | 80.3  | 433 | Mb3289  | 2-phospho-L-glutamate transfer                      | 80.3  | 433 | MAY 4224   | LPFGFO 2-phospho-L-lactate trans                    | 100   | 437 | BCG_3290  | LPFGFO 2-phospho-L-lactate trans                    | 80.3  | 433 | MAY3374c | LPFGFO 2-phospho-L-lactate transfers | 343  | 99.7  |
| MAP4_0409 | hypothetical protein                                   | 88    |         |                                                     |       |     |         |                                                     |       |     |            |                                                     |       |     |           |                                                     |       |     |          |                                      |      |       |
| MAP4_0410 | transcriptional regulator whb-like WhiB2               | 121   | Rv3260c | Probable transcriptional regulatory                 | 87.78 | 89  | Mb3288c | transcriptional regulator Whi                       | 87.78 | 89  | MAY 4223   | transcription factor WhiB                           | 100   | 122 | BCG_3289c | transcriptional regulatory prot                     | 87.78 | 89  | MAY3372c | hypothetical protein                 | 121  | 100   |
| MAP4_0411 | hypothetical protein                                   | 140   | Rv3259c | Probable transcriptional regulatory                 | 91.37 | 139 | Mb3287  | hypothetical protein                                | 91.37 | 139 | MAY 4222   | hypothetical protein                                | 100   | 197 | BCG_3288  | hypothetical protein                                | 91.37 | 139 | MAY3371c | hypothetical protein                 | 140  | 100   |
| MAP4_0412 | hypothetical protein                                   | 165   | Rv3258c | Probable transcriptional regulatory                 | 75.9  | 163 | Mb3286c | hypothetical protein                                | 75.9  | 163 | MAY 4221   | hypothetical protein                                | 99.24 | 132 | BCG_3287c | hypothetical protein                                | 75.9  | 163 | MAY3370c | hypothetical protein                 | 165  | 100   |
| MAP4_0413 | phosphomannomutase PmmA                                | 401   | Rv3257c | Probable phosphomannomutase Pm                      | 85.19 | 465 | Mb3285c | phosphomannomutase                                  | 85.4  | 465 | MAY 4218   | phosphoglucoaminate mutase                          | 31.08 | 444 | BCG_3286c | phosphomannomutase                                  | 85.4  | 465 | MAY3369c | phosphomannomutase/phosphoglucor     | 471  | 100   |
| MAP4_0414 | hypothetical protein                                   | 366   | Rv3256c | hypothetical protein                                | 72.36 | 346 | Mb3284c | hypothetical protein                                | 72.36 | 346 | MAY 4217   | hypothetical protein                                | 99.73 | 366 | BCG_3285c | hypothetical protein                                | 72.36 | 346 | MAY3368c | hypothetical protein                 | 366  | 100   |
| MAP4_0415 | mannose-6-phosphate isomerase ManA                     | 408   | Rv3255c | Probable mannose-6-phosphate iso                    | 83.82 | 408 | Mb3283c | mannose-6-phosphate isomere                         | 83.82 | 408 | MAY 4217   | mannose-6-phosphate isomerase                       | 100   | 408 | BCG_3284c | mannose-6-phosphate isomere                         | 83.82 | 408 | MAY3367c | hypothetical protein                 | 408  | 100   |
| MAP4_0416 | hypothetical protein                                   | 469   | Rv3254c | hypothetical protein                                | 71.4  | 462 | Mb3282  | hypothetical protein                                | 71.4  | 462 | MAY 4218   | hypothetical protein                                | 99.36 | 469 | BCG_3283  | hypothetical protein                                | 71.4  | 462 | MAY3366c | hypothetical protein                 | 469  | 100   |
| MAP4_0417 | cationic amino acid transporter membrane protein       | 505   | Rv3253c | Possible cationic amino acid transpo                | 84.87 | 495 | Mb3281c | cationic amino acid transporter                     | 84.87 | 495 | MAY 4216   | cationic amino acid transporter                     | 100   | 505 | BCG_3282c | cationic amino acid transporter                     | 84.87 | 495 | MAY3365c | hypothetical protein                 | 505  | 100   |
| MAP4_0418 | transmembrane alkane 1-monooxygenase AlkB              | 415   | Rv3252c | Probable transmembrane alkane 1-m                   | 85.19 | 416 | Mb3280c | transmembrane alkane 1-mo                           | 85.19 | 416 | MAY 4215   | alkane-1-monooxygenase                              | 99.28 | 415 | BCG_3281c | transmembrane alkane 1-mo                           | 85.19 | 416 | MAY3364c | hypothetical protein                 | 447  | 100   |
| MAP4_0419 | rubredoxin RubA                                        | 57    | Rv3251c | Probable rubredoxin RubA                            | 74.55 | 55  | Mb3279c | rubredoxin RUBA                                     | 74.55 | 55  | MAY 4214   | rubredoxin                                          | 98.25 | 57  | BCG_3280c | rubredoxin rubA                                     | 74.55 | 55  | MAY3372c | hypothetical protein                 | 1527 | 43.24 |
| MAP4_0420 | rubredoxin RubB                                        | 60    | Rv3250c | Probable rubredoxin RubB                            | 88.14 | 60  | Mb3278c | rubredoxin RubB                                     | 88.14 | 60  | MAY 4213   | rubredoxin                                          | 98.33 | 60  | BCG_3279c | rubredoxin rubA                                     | 88.14 | 60  | MAY3370c | hypothetical protein                 | 607  | 47.66 |
| MAP4_0421 | Transcriptional regulator, TetR family                 | 510   | Rv3249c | Possible transcriptional regulatory p               | 86.21 | 211 | Mb3277c | TetR family transcriptional reg                     | 86.21 | 211 | MAY 4212   | transcriptional regulator                           | 99.5  | 201 | BCG_3278c | TetR family transcriptional reg                     | 86.21 | 211 | MAY3251c | hypothetical protein                 | 199  | 100   |
| MAP4_0422 | adenosylhomocysteinease SahH                           | 496   | Rv3248c | Probable adenosylhomocysteine H                     | 84.79 | 495 | Mb3276c | S-adenosyl-L-homocysteine H                         | 84.79 | 495 | MAY 4211   | S-adenosyl-L-homocysteine hydrol                    | 99.8  | 496 | BCG_3277c | S-adenosyl-L-homocysteine hyd                       | 84.79 | 495 | MAY3362c | S-adenosyl-L-homocysteine hydrolase  | 496  | 100   |
| MAP4_0423 | thymidylate kinase Tmk                                 | 210   | Rv3247c | Thymidylate kinase Tmk (dTMP kin                    | 77.88 | 214 | Mb3275c | thymidylate kinase                                  | 77.88 | 214 | MAY 4210   | thymidylate kinase                                  | 100   | 210 | BCG_3276c | thymidylate kinase                                  | 77.88 | 214 | MAY3361c | hypothetical protein                 | 210  | 100   |
| MAP4_0424 | two component system transcriptional regulator MtrA    | 228   | Rv3246c | Two component sensory transducto                    | 99.56 | 228 | Mb3274c | two component sensory trans                         | 99.56 | 228 | MAY 4209   | DNA-binding response regulator M                    | 100   | 228 | BCG_3275c | two component sensory trans                         | 99.56 | 228 | MAY3360c | hypothetical protein                 | 228  | 100   |
| MAP4_0425 | two component system sensor histidine kinase MtrB      | 564   | Rv3245c | Two component sensory transducti                    | 87.88 | 567 | Mb3273c | two component sensory trans                         | 87.88 | 567 | MAY 4208   | sensor histidine kinase                             | 100   | 543 | BCG_3274c | two component sensory trans                         | 87.88 | 567 | MAY3359c | hypothetical protein                 | 564  | 100   |
| MAP4_0426 | lipoprotein LpgB                                       | 585   | Rv3244c | Probable conserved lipoprotein Lpg                  | 86.08 | 583 | Mb3272c | lipoprotein LpgB                                    | 86.08 | 583 | MAY 4202   | oxidoreductase, FAD-binding                         | 24    | 466 | BCG_3273c | lipoprotein LpgB                                    | 86.08 | 583 | MAY3358c | lipoprotein LpgB                     | 585  | 100   |
| MAP4_0427 | transposase, IS4 family protein                        | 557   | Rv3243c | Possible transposase                                | 25.95 | 234 | Mb3271c | transposase                                         | 25.95 | 234 | MAY 4201   | ABC transporter ATP-binding prot                    | 29.31 | 862 | BCG_3455  | transposase                                         | 25.95 | 234 | MAY3357c | hypothetical protein                 | 557  | 100   |
| MAP4_0428 | hypothetical protein                                   | 213   | Rv3242c | hypothetical protein                                | 69.61 | 213 | Mb3270c | hypothetical protein                                | 69.61 | 213 | MAY 4200   | hypothetical protein                                | 97.01 | 213 | BCG_3271c | hypothetical protein                                | 69.61 | 213 | MAY3356c | hypothetical protein                 | 213  | 100   |
| MAP4_0429 | conserved hypothetical protein, ribosomal S30AE family | 216   | Rv3241c | hypothetical protein                                | 74.67 | 214 | Mb3269c | hypothetical protein                                | 74.67 | 214 | MAY 4199   | EXAFM family protein                                | 98.67 | 216 | BCG_3270c | hypothetical protein                                | 74.67 | 214 | MAY3355c | hypothetical protein                 | 216  | 100   |
| MAP4_0430 | transposase, ScaC                                      | 840   | Rv3240c | Probable transposase translocase Sc                 | 89.67 | 840 | Mb3268c | transposase translocase subunit Sc                  | 89.67 | 840 | MAY 4198   | transposase translocase subunit Sc                  | 98.54 | 777 | BCG_3269c | transposase translocase subunit Sc                  | 89.67 | 840 | MAY3354c | hypothetical protein                 | 840  | 100   |
| MAP4_0431 | hypothetical protein                                   | 348   | Rv3239c | hypothetical protein                                | 34.38 | 333 | Mb3267c | hypothetical protein                                | 34.38 | 333 | MAY 4157   | hypothetical protein                                | 30.88 | 413 | BCG_1055  | hypothetical protein                                | 34.38 | 333 | MAY3353c | hypothetical protein                 | 260  | 100   |
| MAP4_0432 | transcriptional regulator, LuxR family protein         | 523   | Rv3238c | Two component transcriptional regul                 | 39.66 | 217 | Mb3266c | two component transcription                         | 39.66 | 217 | MAY 420157 | LuxR family transcriptional regulat                 | 99.43 | 523 | BCG_3156c | two component transcription                         | 39.66 | 217 | MAY3352c | hypothetical protein                 | 523  | 100   |
| MAP4_0433 | hypothetical protein                                   | 254   | Rv3237c | Probable conserved integral membr                   | 70.25 | 244 | Mb3265c | hypothetical protein                                | 70.25 | 244 | MAY 4200   | hypothetical protein                                | 99.61 | 256 | BCG_3267c | integral membrane protein                           | 70.25 | 244 | MAY3351c | hypothetical protein                 | 254  | 100   |
| MAP4_0434 | conserved hypothetical protein                         | 81.25 | 160     | hypothetical protein                                | 81.25 | 160 | Mb3264c | hypothetical protein                                | 81.25 | 160 | MAY 4199   | putative iron-containing protein                    | 100   | 160 | BCG_3266c | hypothetical protein                                | 81.25 | 160 | MAY3350c | hypothetical protein                 | 160  | 100   |
| MAP4_0435 | conserved membrane transport protein                   | 81.25 | 383     | Probable conserved integral membr                   | 81.25 | 383 | Mb3264c | hypothetical membrane transport                     | 81.25 | 383 | MAY 4199   | transporter, monovalent cationic                    | 99.48 | 387 | BCG_3265c | hypothetical membrane transport                     | 81.25 | 383 | MAY3349c | hypothetical protein                 | 160  | 100   |
| MAP4_0436 | putative alanine, arginine and proline rich protein    | 186   | Rv3235c | hypothetical alanine arginine proli                 | 56.15 | 213 | Mb3263c | hypothetical protein                                | 56.15 | 213 | MAY 4197   | hypothetical protein                                | 97.85 | 186 | BCG_3264  | hypothetical protein                                | 56.15 | 213 | MAY3348c | hypothetical protein                 | 186  | 100   |
| MAP4_0437 | acyl-CoA acyltransferase, Wax ester synthase-like prot | 473   | Rv3234c | Putative triacylglycerol synthase (d                | 83.83 | 271 | Mb3262c | hypothetical protein                                | 84.53 | 469 | MAY 4196   | acyltransferase, wsl/dmgat subu                     | 100   | 473 | BCG_3263c | hypothetical protein                                | 84.53 | 469 | MAY3347c | hypothetical protein                 | 473  | 100   |
| MAP4_0438 | transcriptional regulator PvdS                         | 292   | Rv3233c | Polysphosphate kinase Pmk2 (polyph                  | 82.94 | 295 | Mb3261c | transcriptional regulator PvdS                      | 82.94 | 295 | MAY 4195   | polysphosphate kinase 2                             | 98.95 | 295 | BCG_3262c | transcriptional regulatory prot                     | 82.94 | 295 | MAY3346c | PvdS                                 | 292  | 100   |
| MAP4_0439 | hypothetical protein                                   | 80.99 | 321c    | hypothetical protein                                | 80.99 | 321 | Mb3260c | hypothetical protein                                | 80.99 | 321 | MAY 4194   | hypothetical protein                                | 100   | 284 | BCG_3261c | hypothetical protein                                | 80.99 | 321 | MAY3345c | hypothetical protein                 | 321  | 100   |
| MAP4_0440 | oxidoreductase, flavodoxin reductase family protein    | 170   | Rv3232c | hypothetical oxidoreductase                         | 81.42 | 387 | Mb3259c | hypothetical oxidoreductase                         | 81.42 | 387 | MAY 4193   | Fe-2S iron-sulfur cluster binding d                 | 100   | 384 | BCG_3260c | hypothetical protein                                | 81.42 | 387 | MAY3344c | hypothetical protein                 | 170  | 100   |
| MAP4_0441 | Involoyl-CoA desaturase                                | 427   | Rv3229c | Possible Involoyl-CoA desaturase (d                 | 85.25 | 427 | Mb3258c | Involoyl-CoA desaturase                             | 85.25 | 427 | MAY 4192   | hypothetical protein                                | 100   | 427 | BCG_3259c | Involoyl-CoA desaturase                             | 85.25 | 427 | MAY3343c | DesA1_3                              | 427  | 100   |
| MAP4_0442 | hypothetical protein                                   | 278   | Rv3264c | Probable acyl-CoA dehydrogenase F                   | 28.36 | 318 | Mb3259c | acyl-CoA dehydrogenase                              | 28.36 | 318 | MAY 4191   | hypothetical protein                                | 99.27 | 274 | BCG_3628  | acyl-CoA dehydrogenase FadE                         | 28.36 | 318 | MAY3342  | hypothetical protein                 | 278  | 100   |
| MAP4_0443 | Transcriptional regulator, TetR family                 | 204   | Rv3255c | Probable transcriptional regulato                   | 31.31 | 202 | Mb3258c | TetR family transcriptional reg                     | 31.31 | 202 | MAY 4189   | TetR family transcriptional regulat                 | 99.04 | 208 | BCG_1013c | TetR family transcriptional reg                     | 27.49 | 234 | MAY3340  | hypothetical protein                 | 224  | 100   |
| MAP4_0444 | hypothetical protein                                   | 380   | Rv3282c | ISX conserved component ECe1 ES                     | 44.72 | 462 | Mb3276c | hypothetical protein                                | 44.72 | 462 | MAY 4188   | hypothetical protein                                | 98.16 | 380 | BCG_3257c | hypothetical protein                                | 44.72 | 462 | MAY3339c | hypothetical protein                 | 380  | 100   |
| MAP4_0445 | hypothetical protein                                   | 174   | Rv3083c | Phosphoribosylformylglycinam                        | 34.92 | 75  | Mb3083c | phosphoribosylformylglycinam                        | 34.92 | 74  | MAY 4187   | hypothetical protein                                | 97.77 | 174 | BCG_0853c | phosphoribosylformylglycinam                        | 34.92 | 75  | MAY3338c | hypothetical protein                 | 174  | 100   |
| MAP4_0446 | acyl-CoA acetyltransferase                             | 391   | Rv3556c | Probable acetyl-CoA acetyltransfera                 | 47.74 | 386 | Mb3586c | acyl-CoA acetyltransferase                          | 47.74 | 386 | MAY 4185   | FadA6_4                                             | 99.23 | 391 | BCG_3620c | acyl-CoA acetyltransferase                          | 47.74 | 386 | MAY3337c | FadA_6                               | 391  | 100   |
| MAP4_0447 | Transcriptional regulator, Hmr family                  | 158   | Rv3095c | hypothetical transcriptional regulat                | 34.71 | 158 | Mb3212c | transcriptional regulator                           | 34.71 | 158 | MAY 4183   | transcriptional regulator                           | 98.73 | 158 | BCG_3120  | transcriptional regulator                           | 34.71 | 158 | MAY3336c | hypothetical protein                 | 158  | 99.36 |
| MAP4_0448 | hypothetical protein                                   | 331   | Rv3228c | hypothetical protein                                | 89.1  | 330 | Mb3257c | hypothetical protein                                | 89.1  | 330 | MAY 4184   | GTase EngC                                          | 99.09 | 331 | BCG_3351  | hypothetical protein                                | 89.1  | 330 | MAY3335c | hypothetical protein                 | 331  | 100   |
| MAP4_0    |                                                        |       |         |                                                     |       |     |         |                                                     |       |     |            |                                                     |       |     |           |                                                     |       |     |          |                                      |      |       |

Table S1 continued

|           |                                                       |      |         |                                       |       |      |         |                                 |       |      |          |                                           |       |      |           |                                 |       |      |          |                                |      |       |
|-----------|-------------------------------------------------------|------|---------|---------------------------------------|-------|------|---------|---------------------------------|-------|------|----------|-------------------------------------------|-------|------|-----------|---------------------------------|-------|------|----------|--------------------------------|------|-------|
| M4P4_0500 | hypothetical protein                                  | 354  | Rv2870c | 1-deoxy-D-xylulose 5-phosph           | 25.75 | 413  | Mb2895c | 1-deoxy-D-xylulose 5-phosph     | 25.75 | 413  | MV_4123  | hypothetical protein                      | 99.71 | 343  | BCG_2892c | 1-deoxy-D-xylulose 5-phosph     | 25.75 | 413  | MAP3285c | hypothetical protein           | 354  | 100   |
| M4P4_0501 | AMP-binding reductase                                 | 1083 | Rv2950c | Fatty acid-AMP lyase FadD29 (fatty    | 34.42 | 619  | Mb2974c | acyl-CoA synthetase             | 34.42 | 582  | MAM_4122 | AMP-binding enzyme                        | 99.72 | 3083 | BCG_2971c | acyl-CoA synthetase             | 34.42 | 619  | MAP3284c | FadD29                         | 1115 | 100   |
| M4P4_0502 | hypothetical protein                                  | 302  | Rv2777c | hypothetical protein                  | 74.75 | 305  | Mb2997c | hypothetical protein            | 74.75 | 305  | MAM_4116 | hypothetical protein                      | 99.72 | 302  | BCG_2794c | hypothetical protein            | 74.75 | 305  | MAP3283c | hypothetical protein           | 302  | 100   |
| M4P4_0503 | putative hydrophobin alpha/beta fold family protein   | 309  | Rv2214c | hypothetical protein                  | 36.13 | 502  | Mb2237c | hypothetical protein            | 36.13 | 516  | MAM_4120 | alpha/beta fold hydrolase                 | 97.73 | 309  | BCG_2230c | short chain dehydrogenase       | 36.13 | 509  | MAP3282c | hypothetical protein           | 309  | 100   |
| M4P4_0504 | oxidoreductase                                        | 360  | Rv2776c | Probable oxidoreductase               | 78.96 | 309  | Mb2798c | oxidoreductase                  | 78.96 | 309  | MAM_4119 | oxidoreductase                            | 99.17 | 360  | BCG_2793c | oxidoreductase                  | 78.96 | 309  | MAP3281c | hypothetical protein           | 362  | 100   |
| M4P4_0505 | putative transporter_sodium hydrogen exchanger fam    | 392  | Rv2626c | hypothetical protein                  | 37.65 | 360  | Mb2855c | hypothetical protein            | 37.65 | 502  | MAM_4118 | transporter, monovalent cation/Na+        | 98.47 | 392  | BCG_2779c | hypothetical protein            | 37.65 | 502  | MAP3280c | hypothetical protein           | 392  | 100   |
| M4P4_0506 | hypothetical protein                                  | 351  | Rv2756c | Possible type I restriction/modifica  | 31.03 | 540  | Mb2077c | type I restriction/modification | 31.03 | 540  | MAM_4117 | transporter, monovalent cation/Na+        | 98.01 | 351  | BCG_2272c | type I restriction/modification | 31.03 | 540  | MAP3279c | hypothetical protein           | 351  | 100   |
| M4P4_0507 | hypothetical protein                                  | 427  | Rv2772c | Probable pyruvate synthase Pck1       | 28.21 | 216  | Mb2771c | pyruvate synthase               | 28.21 | 216  | MAM_4116 | hypothetical protein                      | 97.66 | 427  | BCG_2172c | pyruvate synthase pck1          | 28.21 | 212  | MAP3278c | hypothetical protein           | 427  | 100   |
| M4P4_0508 | hypothetical protein                                  | 96   | Rv0884  | Possible formate hydrogenase hfd      | 51.85 | 316  | Mb0897  | hydrogenase HFD                 | 51.85 | 316  | MAM_4115 | hypothetical protein                      | 97.95 | 440  | BCG_0187  | formate hydrogenase hfd         | 51.85 | 316  | MAP3277c | hypothetical protein           | 96   | 100   |
| M4P4_0509 | hypothetical protein                                  | 444  | Rv2963  | Probable integral membrane prote      | 27.96 | 406  | Mb2987  | hypothetical protein            | 27.96 | 406  | MAM_4114 | hypothetical protein                      | 99.00 | 444  | BCG_2114  | integral membrane prote         | 27.96 | 406  | MAP3276c | hypothetical protein           | 444  | 100   |
| M4P4_0510 | putative nitrate/nitrite response transcri            | 211  | Rv0844c | Possible nitrate/nitrite response tra | 43.15 | 216  | Mb0867c | nitrate/nitrite response trans  | 43.15 | 216  | MAM_4114 | response regulator receiver domai         | 99.91 | 221  | BCG_0896c | nitrate/nitrite response trans  | 43.15 | 216  | MAP3275c | NarJ_2                         | 221  | 100   |
| M4P4_0511 | hypothetical protein                                  | 386  | Rv0758  | Possible two component system res     | 31.67 | 485  | Mb0781  | two component system respo      | 31.67 | 485  | MAM_4112 | hypothetical protein                      | 98.87 | 386  | BCG_0810  | two component system respo      | 31.67 | 485  | MAP3274c | hypothetical protein           | 386  | 100   |
| M4P4_0512 | hypothetical protein                                  | 324  | Rv3131c | hypothetical protein                  | 66.87 | 332  | Mb3155  | hypothetical protein            | 66.87 | 332  | MAM_4111 | hypothetical protein                      | 98.74 | 324  | BCG_3154  | hypothetical protein            | 66.87 | 332  | MAP3273c | hypothetical protein           | 324  | 100   |
| M4P4_0513 | hypothetical protein                                  | 138  | Rv1320  | hypothetical protein                  | 58.24 | 110  | Mb3153  | hypothetical protein            | 58.24 | 110  | MAM_4110 | hypothetical protein                      | 96.38 | 138  | BCG_3152  | hypothetical protein            | 58.24 | 110  | MAP3272c | hypothetical protein           | 138  | 100   |
| M4P4_0514 | two-component transcriptional system regulatory pro   | 222  | Rv3133c | Two component transcriptional regu    | 85.12 | 217  | Mb3157c | two component transcription     | 85.12 | 217  | MAM_4109 | DevR family transcriptional regulat       | 99.55 | 222  | BCG_3156c | two component transcriptional   | 85.12 | 217  | MAP3271c | hypothetical protein           | 222  | 100   |
| M4P4_0515 | putative two-component system sensor histidine kinas  | 541  | Rv3132c | Two component sensor histidine kin    | 44.06 | 578  | Mb3156c | two component sensor histid     | 44.06 | 578  | MAM_4108 | GAF family protein                        | 99.46 | 541  | BCG_3155c | two component sensor histidi    | 44.06 | 578  | MAP3270c | hypothetical protein           | 541  | 100   |
| M4P4_0516 | hypothetical protein                                  | 252  | Rv0837c | hypothetical protein                  | 34.62 | 342  | Mb0860c | hypothetical protein            | 34.62 | 342  | MAM_4107 | ANTAR domain-containing protein           | 98.68 | 227  | BCG_0898c | hypothetical protein            | 34.62 | 342  | MAP3269c | hypothetical protein           | 242  | 100   |
| M4P4_0517 | heat shock protein_18kD                               | 147  | Rv2031c | Heat shock protein Hsp90 (alpha-cty   | 32.63 | 144  | Mb2057c | heat shock protein hsp90        | 32.63 | 144  | MAM_4106 | Hsp90/alpha crystallin family prote       | 99.96 | 147  | BCG_2050c | heat shock protein hsp90        | 32.63 | 144  | MAP3268  | Hsp90_3                        | 147  | 100   |
| M4P4_0518 | MerR family heat shock protein transcriptional repres | 120  | Rv0353  | Probable heat shock protein transcri  | 53.62 | 126  | Mb0361  | HEAT Shock protein Hsp90        | 53.62 | 126  | MAM_4104 | hypothetical protein                      | 100   | 120  | BCG_0392  | heat shock protein transcrip    | 53.62 | 126  | MAP3267c | hypothetical protein           | 120  | 100   |
| M4P4_0519 | hypothetical protein                                  | 178  | Rv3196A | hypothetical protein                  | 44    | 66   | MV_4104 | hypothetical protein            | 44    | 66   | MAM_4104 | hypothetical protein                      | 99.44 | 178  | BCG_3219c | hypothetical protein            | 44    | 66   | MAP3266c | hypothetical protein           | 178  | 100   |
| M4P4_0520 | hypothetical protein                                  | 434  | Rv1854c | Probable NADH dehydrogenase Ndh       | 30.3  | 463  | Mb1855c | NADH dehydrogenase              | 30.3  | 463  | MAM_4103 | hypothetical protein                      | 99.07 | 434  | BCG_1890c | NADH dehydrogenase ndh          | 30.05 | 463  | MAP3265  | hypothetical protein           | 434  | 100   |
| M4P4_0521 | conserved hypothetical ANTAR domain-containing pro    | 235  | Rv2006  | Probable trehalose-6-phosphate pho    | 36.11 | 1327 | Mb2029  | trehalose-6-phosphate phosp     | 36.11 | 1327 | MAM_4102 | ANTAR domain-containing protein           | 99.57 | 235  | BCG_2023  | trehalose-6-phosphate phosp     | 36.11 | 1327 | MAP3264c | hypothetical protein           | 245  | 100   |
| M4P4_0522 | dehydrogenase                                         | 359  | Rv1895  | Possible dehydrogenase                | 25.28 | 384  | Mb1929  | dehydrogenase                   | 25.28 | 384  | MAM_4101 | 5-hydroxytryptophan/tryptophan de         | 99.75 | 393  | BCG_1934  | hypothetical protein            | 25.28 | 384  | MAP3263c | hypothetical protein           | 393  | 100   |
| M4P4_0523 | multio-oligopyruvate synthase                         | 716  | Rv1544c | Probable multio-oligopyruvate synth   | 66.39 | 721  | Mb1591c | multio-oligopyruvate synth      | 66.39 | 721  | MAM_4100 | hypothetical protein                      | 99.72 | 716  | BCG_1616c | multio-oligopyruvate synth      | 66.39 | 721  | MAP3262c | glsK_2                         | 716  | 100   |
| M4P4_0524 | oxidoreductase                                        | 299  | Rv0765c | Probable oxidoreductase               | 31.31 | 275  | Mb0788c | short chain dehydrogenase       | 31.31 | 275  | MAM_4099 | NAD dependent epimerase/dehyd             | 99.22 | 299  | BCG_0817c | short chain dehydrogenase       | 31.31 | 275  | MAP3261c | hypothetical protein           | 271  | 100   |
| M4P4_0525 | putative aldolase reductase                           | 324  | Rv2298  | hypothetical protein                  | 82.04 | 323  | Mb2320  | aldol/keto reductase            | 82.04 | 323  | MAM_4098 | aldol/keto reductase                      | 99.69 | 324  | BCG_2314  | hypothetical protein            | 82.04 | 323  | MAP3260  | hypothetical protein           | 324  | 100   |
| M4P4_0526 | putative protein kinase                               | 333  | Rv2088  | Transmembrane serine/threonine-p      | 38.14 | 589  | Mb2073c | Ser/Thr protein kinase          | 38.14 | 589  | MAM_4097 | PkinI protein                             | 99.4  | 333  | BCG_2108  | transmembrane serine/threon     | 38.14 | 589  | MAP3259  | hypothetical protein           | 333  | 100   |
| M4P4_0527 | hypothetical protein                                  | 374  | Rv0276c | hypothetical protein                  | 28.57 | 380  | Mb0276c | hypothetical protein            | 28.57 | 380  | MAM_4096 | hypothetical protein                      | 98.78 | 374  | BCG_0276c | hypothetical protein            | 28.57 | 380  | MAP3258  | hypothetical protein           | 374  | 100   |
| M4P4_0528 | hypothetical protein                                  | 316  | Rv2148c | hypothetical protein                  | 31.25 | 258  | Mb2173c | hypothetical protein            | 31.25 | 258  | MAM_4095 | benzophenone HHE cation binding d         | 99.00 | 316  | BCG_2185c | hypothetical protein            | 31.25 | 258  | MAP3257c | hypothetical protein           | 316  | 100   |
| M4P4_0529 | putative uracil-DNA glycosylase                       | 211  | Rv1259  | Probable uracil DNA glycosylase, Udg  | 29.25 | 299  | Mb1259  | hypothetical protein            | 29.25 | 299  | MAM_4094 | uracil DNA glycosylase                    | 99.55 | 211  | BCG_1317  | hypothetical protein            | 29.25 | 299  | MAP3256c | hypothetical protein           | 211  | 100   |
| M4P4_0530 | putative thiamine pyrophosphate enzyme                | 597  | Rv3003c | Acetolactate synthase (large subun    | 28.47 | 618  | Mb3028c | acetolactate synthase I catal   | 28.47 | 618  | MAM_4093 | thiamine pyrophosphate protein            | 98.99 | 597  | BCG_3025c | acetolactate synthase I cataly  | 28.47 | 618  | MAP3255  | thiamine pyrophosphate protein | 597  | 100   |
| M4P4_0531 | putative UDP-glucose-6-dehydrogenase                  | 434  | Rv0322  | Probable UDP-glucose 6-dehydrogen     | 38.29 | 443  | Mb0322c | UDP-glucose 6-dehydrogenase     | 38.29 | 443  | MAM_4092 | UDP-glucose 6-dehydrogenase               | 99.54 | 434  | BCG_0362  | udp-glucose 6-dehydrogenase     | 38.29 | 443  | MAP3254  | hypothetical protein           | 508  | 100   |
| M4P4_0532 | putative glyoxylate transferase                       | 457  | Rv2077c | Probable glyoxylate transferase       | 28.76 | 452  | Mb2077c | protoporphyrin-oxidase          | 28.76 | 452  | MAM_4091 | acyl-CoA dehydrogenase                    | 99.77 | 457  | BCG_2076c | glyoxylate transferase          | 28.76 | 452  | MAP3253  | hypothetical protein           | 457  | 100   |
| M4P4_0533 | short-chain dehydrogenase reductase                   | 231  | Rv0831c | Probable short-chain type dehydro     | 33.7  | 275  | Mb0831c | acyl-CoA dehydrogenase          | 33.7  | 275  | MAM_4090 | acyl-CoA dehydrogenase, short chain dehyd | 99.31 | 231  | BCG_0930c | short chain dehydrogenase       | 33.7  | 275  | MAP3252  | hypothetical protein           | 231  | 100   |
| M4P4_0534 | hypothetical protein                                  | 989  | Rv3386  | Probable iron-sulfur-binding reduct   | 36.36 | 882  | Mb3386c | iron-sulfur-binding reductase   | 36.36 | 882  | MAM_4087 | transferase                               | 99.35 | 989  | BCG_0377c | iron-sulfur-binding reductase   | 36.36 | 882  | MAP3251  | hypothetical protein           | 989  | 100   |
| M4P4_0535 | putative transferase                                  | 496  | Rv0114  | Possible D-alpha,beta-D-heptose-1,    | 38.68 | 190  | Mb0118  | dehydratase                     | 38.68 | 190  | MAM_4086 | transferase                               | 99.98 | 496  | BCG_0147  | dehydratase                     | 38.68 | 190  | MAP3250  | hypothetical protein           | 333  | 100   |
| M4P4_0536 | carbamoyltransferase                                  | 546  | Rv0193c | hypothetical protein                  | 36.92 | 615  | Mb0193c | hypothetical protein            | 36.92 | 615  | MAM_4085 | transferase                               | 99.27 | 546  | BCG_0230c | hypothetical protein            | 36.92 | 615  | MAP3249  | hypothetical protein           | 546  | 100   |
| M4P4_0537 | putative NAD-dependent epimerase dehydratase          | 350  | Rv3184  | Possible UDP-glucose 4-6-dehydrat     | 29.81 | 326  | Mb3175  | UDP-glucose 4-6-dehydratase     | 29.81 | 326  | MAM_4084 | UDP-glucose 4-6-dehydratase               | 99.77 | 350  | BCG_3184c | UDP-glucose 4-6-dehydratase     | 29.81 | 326  | MAP3248  | hypothetical protein           | 350  | 100   |
| M4P4_0540 | putative glyoxylate transferase                       | 406  | Rv0486  | Probable glyoxylate transferase       | 33.83 | 480  | Mb0486  | hypothetical protein            | 33.83 | 480  | MAM_4082 | transferase                               | 99.01 | 406  | BCG_0527  | hypothetical protein            | 33.83 | 480  | MAP3246  | hypothetical protein           | 413  | 100   |
| M4P4_0541 | hypothetical protein                                  | 322  | Rv1885  | Mannosyltransferase PmbB              | 32.61 | 385  | Mb2111c | hypothetical protein            | 32.61 | 385  | MAM_4081 | transferase                               | 98.05 | 308  | BCG_2204c | hypothetical protein            | 32.61 | 385  | MAP3245  | hypothetical protein           | 322  | 100   |
| M4P4_0542 | putative DNA topoisomerase                            | 351  | Rv2744c | Conserved 35 kDa alanine rich pro     | 34.18 | 270  | Mb2765c | hypothetical protein            | 34.18 | 270  | MAM_4076 | extracellular solute-binding protein      | 78.57 | 357  | BCG_2760c | hypothetical protein            | 34.18 | 270  | MAP3244  | hypothetical protein           | 399  | 100   |
| M4P4_0544 | hypothetical protein                                  | 278  | Rv2047c | hypothetical protein                  | 31.07 | 854  | Mb2073c | hypothetical protein            | 31.07 | 854  | MAM_4076 | hypothetical protein                      | 96.15 | 278  | BCG_2066c | hypothetical protein            | 31.07 | 854  | MAP3242  | hypothetical protein           | 346  | 99.64 |
| M4P4_0545 | hypothetical protein                                  | 375  | Rv1379  | Functional pyrimidine operon regul    | 36    | 38   | Mb1379  | hypothetical protein            | 36    | 38   | MAM_4077 | hypothetical protein                      | 98.78 | 378  | BCG_1440  | functional pyrimidine regul     | 36    | 38   | MAP3241  | hypothetical protein           | 311  | 57.69 |
| M4P4_0546 | hypothetical protein                                  | 103  | Rv0453c | hypothetical protein                  | 38.2  | 100  | Mb0453c | hypothetical protein            | 38.2  | 100  | MAM_4075 | hypothetical protein                      | 98.06 | 103  | BCG_0587c | hypothetical protein            | 38.2  | 100  | MAP3240  | hypothetical protein           | 95   | 33.08 |
| M4P4_0547 | putative endonuclease exonuclease phosphatase         | 254  | Rv3130c | Triacylglycerol synthase (diacylgl    | 30.12 | 463  | Mb3130c | hypothetical protein            | 30.12 | 463  | MAM_4074 | endonuclease/exonuclease/phosp            | 98.81 | 252  | BCG_0353c | hypothetical protein            | 30.12 | 463  | MAP3239  | hypothetical protein           | 260  | 100   |
| M4P4_0548 | conserved hypothetical protein_gliNAC-Pide-N-acetyl   | 215  | Rv0323c | hypothetical protein                  | 31.09 | 223  | Mb0323c | gliNAC-Pi de-N-acetylase        | 31.09 | 223  | MAM_4074 | hypothetical protein                      | 97.65 | 215  | BCG_0363c | hypothetical protein            | 31.09 | 223  | MAP3239  | hypothetical protein           | 252  | 99.6  |
| M4P4_0549 | hypothetical protein                                  | 239  | Rv3061c | Possible acyl-CoA dehydrogenase F     | 39.53 | 721  | Mb3067c | acyl-CoA dehydrogenase          | 39.53 | 600  | MAM_4073 | hypothetical protein                      | 98.68 | 237  | BCG_3086c | acyl-CoA dehydrogenase fadE2    | 39.53 | 721  | MAP3238  | hypothetical protein           | 319  | 100   |
| M4P4_0550 | hypothetical protein                                  | 191  | Rv0078A | hypothetical protein                  | 39.53 | 193  | Mb0078A | hypothetical protein            | 39.53 | 193  | MAM_4    |                                           |       |      |           |                                 |       |      |          |                                |      |       |

# Table S1 continued

|           |                                                              |     |         |                                         |       |      |         |                                  |       |      |        |                                      |       |     |           |                                   |       |      |          |                                    |     |       |
|-----------|--------------------------------------------------------------|-----|---------|-----------------------------------------|-------|------|---------|----------------------------------|-------|------|--------|--------------------------------------|-------|-----|-----------|-----------------------------------|-------|------|----------|------------------------------------|-----|-------|
| MAPA_0600 | acyl-CoA dehydrogenase                                       | 401 | Rv3140  | Probable acyl-CoA dehydrogenase F       | 88.28 | 401  | Mb3164  | acyl-CoA dehydrogenase           | 88.28 | 401  | MV4101 | acyl-CoA dehydrogenase               | 99.5  | 401 | BGC_3163  | acyl-CoA dehydrogenase FadE       | 88.28 | 401  | MAP3189  | FadE23                             | 401 | 100   |
| MAPA_0601 | putative acyl-CoA dehydrogenase F                            | 463 | Rv3139  | Probable acyl-CoA dehydrogenase F       | 87.64 | 468  | Mb3163  | acyl-CoA dehydrogenase           | 87.64 | 468  | MV4018 | acyl-CoA dehydrogenase               | 99.57 | 463 | BGC_3162  | acyl-CoA dehydrogenase FadE       | 87.64 | 468  | MAP3188  | FadE24                             | 463 | 100   |
| MAPA_0602 | phosphoglucosyltransferase                                   | 259 | Rv3137  | Probable phosphoglucosyltransferase     | 78.5  | 265  | Mb3134  | phosphoglucosyltransferase       | 78.5  | 265  | MV4017 | phosphoglucosyltransferase           | 99.23 | 259 | BGC_3161  | phosphoglucosyltransferase        | 78.5  | 265  | MAP3187  | Phosphoglucosyltransferase         | 259 | 100   |
| MAPA_0603 | hypothetical protein                                         | 114 | Rv3136A | hypothetical protein                    | 75.47 | 110  | Mb3218  | nitrophenol-sulfuryl protein Ctr | 47.62 | 429  | MV4016 | hypothetical protein                 | 100   | 117 | BGC_3160  | Rieske iron-sulfur protein Ctr    | 47.62 | 429  | MAP3186A | hypothetical protein               | 111 | 100   |
| MAPA_0604 | PPE family protein                                           | 362 | Rv3136  | PPE family protein PPE1                 | 52.21 | 380  | Mb3160  | PPE family protein               | 52.21 | 380  | MV4015 | PPE family protein                   | 98.9  | 362 | BGC_3159  | PPE family protein                | 52.21 | 380  | MAP3185  | hypothetical protein               | 362 | 100   |
| MAPA_0605 | PPE family protein                                           | 391 | Rv3136  | PPE family protein PPE1                 | 49.63 | 380  | Mb3160  | PPE family protein               | 49.63 | 380  | MV4014 | PPE family protein                   | 99.49 | 391 | BGC_3159  | PPE family protein                | 49.63 | 380  | MAP3184  | hypothetical protein               | 391 | 100   |
| MAPA_0606 | hypothetical protein                                         | 265 | Rv3148B | Possible exported conserved protein     | 35.03 | 381  | Mb3124  | hypothetical protein             | 35.03 | 381  | MV4013 | SPFH domain-containing protein/b     | 99.25 | 265 | BGC_3158  | hypothetical protein              | 35.03 | 381  | MAP3183  | hypothetical protein               | 265 | 100   |
| MAPA_0607 | hypothetical protein                                         | 208 | Rv3401  | hypothetical protein                    | 32.58 | 208  | Mb3134  | hypothetical protein             | 32.58 | 208  | MV4012 | hypothetical protein                 | 99.04 | 208 | BGC_3157  | hypothetical protein              | 32.58 | 208  | MAP3182  | hypothetical protein               | 208 | 100   |
| MAPA_0610 | hypothetical protein                                         | 252 | Rv3134C | Universal stress protein family class 2 | 53.65 | 268  | Mb3134  | hypothetical protein             | 53.65 | 268  | MV4010 | hypothetical protein                 | 100   | 252 | BGC_3157  | hypothetical protein              | 53.65 | 268  | MAP3179A | hypothetical protein               | 252 | 100   |
| MAPA_0611 | hypothetical protein                                         | 154 | Rv1001  | Probable arginine deiminase ArcA        | 39.58 | 402  | Mb3028  | arginine deiminase               | 39.58 | 402  | MV4008 | hypothetical protein                 | 98.7  | 154 | BGC_1058  | arginine deiminase                | 39.58 | 402  | MAP3178  | hypothetical protein               | 154 | 100   |
| MAPA_0612 | putative pyridoxamine 5'-phosphate oxidase                   | 151 | Rv3129  | hypothetical protein                    | 70.3  | 110  | Mb3133  | hypothetical protein             | 70.3  | 110  | MV4009 | hypothetical protein                 | 99.34 | 151 | BGC_3152  | hypothetical protein              | 70.3  | 110  | MAP3177  | hypothetical protein               | 151 | 100   |
| MAPA_0613 | NADPH:adrenodoxin oxidoreductase                             | 455 | Rv3106  | NADPH:adrenodoxin oxidoreductase        | 79.61 | 456  | Mb3133  | NADPH:adrenodoxin oxidoreductase | 79.61 | 456  | MV4007 | NADPH:ferredoxin reductase fpr       | 99.34 | 455 | BGC_3131  | NADPH:adrenodoxin oxidoreductase  | 79.61 | 456  | MAP3176  | fprA                               | 455 | 100   |
| MAPA_0614 | peptide chain release factor 2                               | 370 | Rv3105C | Probable peptide chain release factor 2 | 90.84 | 378  | Mb3132  | peptide chain release factor 2   | 90.84 | 378  | MV4006 | peptide chain release factor 2       | 99.73 | 370 | BGC_3130C | peptide chain release factor 2    | 90.84 | 378  | MAP3175  | peptide chain release factor 2     | 373 | 97.3  |
| MAPA_0615 | hypothetical protein                                         | 311 | Rv3104C | Possible conserved transmembrane        | 72.05 | 308  | Mb3131C | transmembrane protein            | 72.05 | 308  | MV4005 | transporter, small conductance me    | 99.66 | 292 | BGC_3130C | transmembrane protein             | 72.05 | 308  | MAP3174C | hypothetical protein               | 311 | 100   |
| MAPA_0616 | putative proline rich protein                                | 166 | Rv3103C | Probable proline-rich protein           | 63.01 | 145  | Mb3130C | hypothetical protein             | 63.01 | 145  | MV4004 | hypothetical protein                 | 99.4  | 166 | BGC_3128C | hypothetical protein              | 63.01 | 145  | MAP3173C | hypothetical protein               | 166 | 100   |
| MAPA_0617 | cell division ATP-binding protein FtsE                       | 229 | Rv3102C | Putative cell division ATP-binding pr   | 93.01 | 229  | Mb3128C | cell division ATP-binding pr     | 93.01 | 229  | MV4003 | cell division ATP-binding protein F  | 100   | 230 | BGC_3127C | cell division ATP-binding protein | 93.01 | 229  | MAP3172C | hypothetical protein               | 229 | 100   |
| MAPA_0618 | cell division protein FtsX                                   | 297 | Rv3101C | Putative cell division protein FtsX     | 80.47 | 297  | Mb3128C | cell division protein FtsX       | 80.47 | 297  | MV4002 | efflux ABC transporter permease      | 99.66 | 297 | BGC_3126C | cell division protein FtsX        | 80.47 | 297  | MAP3171C | hypothetical protein               | 297 | 100   |
| MAPA_0619 | hypothetical protein                                         | 169 | Rv3100K | Probable SsrA-binding protein SsrA      | 84.31 | 160  | Mb3127C | SsrA-binding protein             | 84.31 | 160  | MV4001 | SsrA-binding protein                 | 98.11 | 169 | BGC_3125C | SsrA-binding protein              | 84.31 | 160  | MAP3170C | SsrA-binding protein               | 169 | 100   |
| MAPA_0620 | hypothetical protein                                         | 263 | Rv0676C | Probable conserved transmembrane        | 24    | 964  | Mb3095C | transmembrane transport pr       | 24    | 964  | MV4000 | hypothetical protein                 | 100   | 248 | BGC_0725C | transmembrane transport pr        | 24    | 964  | MAP3169C | hypothetical protein               | 263 | 100   |
| MAPA_0621 | hypothetical protein                                         | 283 | Rv3099C | Conserved alanine rich protein          | 72.44 | 283  | Mb3126C | hypothetical protein             | 72.44 | 283  | MV4050 | hypothetical protein                 | 27.67 | 257 | BGC_3124C | hypothetical protein              | 72.44 | 283  | MAP3168C | hypothetical protein               | 283 | 100   |
| MAPA_0622 | hypothetical protein                                         | 148 | Rv2728C | Conserved alanine rich protein          | 26.67 | 231  | Mb2747C | hypothetical protein             | 26.67 | 231  | MV3997 | hypothetical protein                 | 97.87 | 102 | BGC_2741C | hypothetical protein              | 26.67 | 231  | MAP3167C | hypothetical protein               | 148 | 100   |
| MAPA_0623 | hypothetical protein                                         | 251 | Rv1283C | Probable oligopeptide-transport int     | 50    | 325  | Mb3114C | oligopeptide-transport integr    | 50    | 325  | MV3995 | hypothetical protein                 | 96.68 | 241 | BGC_1342C | oligopeptide-transport integr     | 50    | 325  | MAP3166C | hypothetical protein               | 251 | 100   |
| MAPA_0624 | putative glyoxyltransferase family protein                   | 388 | Rv1524  | Probable glyoxyltransferase             | 53.12 | 414  | Mb3151  | glyoxyltransferase               | 53.12 | 414  | MV3994 | glyoxyltransferase GfB               | 96.91 | 396 | BGC_1576C | glyoxyltransferase                | 53.12 | 414  | MAP3165C | hypothetical protein               | 388 | 100   |
| MAPA_0625 | hypothetical protein                                         | 117 | Rv0481C | Possible conserved transmembrane        | 38.76 | 174  | Mb3091C | hypothetical protein             | 38.76 | 174  | MV3993 | hypothetical protein                 | 99.4  | 168 | BGC_0522C | hypothetical protein              | 38.76 | 174  | MAP3164C | hypothetical protein               | 117 | 100   |
| MAPA_0626 | hypothetical protein                                         | 232 | Rv2719C | Possible conserved membrane pro         | 44.44 | 165  | Mb2738C | hypothetical protein             | 44.44 | 165  | MV4517 | cytoplasmic-fatty-acyl-phospho       | 33.33 | 298 | BGC_2732C | hypothetical protein              | 44.44 | 165  | MAP3163C | hypothetical protein               | 232 | 100   |
| MAPA_0629 | phytanoyl-CoA dioxygenase (PhyH) family protein              | 287 | Rv3633  | hypothetical protein                    | 36.87 | 291  | Mb3657  | hypothetical protein             | 36.87 | 291  | MV3990 | phytanoyl-CoA dioxygenase (PhyH)     | 98.61 | 287 | BGC_3691  | hypothetical protein              | 36.87 | 291  | MAP3160  | hypothetical protein               | 287 | 99.64 |
| MAPA_0630 | hypothetical protein                                         | 486 | Rv002C  | hypothetical protein                    | 28.79 | 503  | Mb3029C | hypothetical protein             | 28.79 | 503  | MV3989 | phosphogluco-5 dioxygenase           | 99.38 | 486 | BGC_1059C | hypothetical protein              | 28.79 | 503  | MAP3159  | hypothetical protein               | 486 | 100   |
| MAPA_0631 | hypothetical protein                                         | 101 | Rv3085  | hypothetical protein                    | 50.96 | 118  | Mb3083  | hypothetical protein             | 50.96 | 118  | MV3988 | hypothetical protein                 | 99.56 | 131 | BGC_3085C | hypothetical protein              | 50.96 | 118  | MAP3158C | hypothetical protein               | 101 | 100   |
| MAPA_0633 | hypothetical protein                                         | 314 | Rv1845C | hypothetical protein                    | 24.09 | 351  | Mb3075C | hypothetical protein             | 24.09 | 351  | MV3987 | hypothetical protein                 | 99.4  | 314 | BGC_1684C | hypothetical protein              | 24.09 | 351  | MAP3157C | hypothetical protein               | 314 | 100   |
| MAPA_0635 | Transcriptional regulator, TetR family                       | 198 | Rv0825C | hypothetical protein                    | 33.33 | 213  | Mb3084C | hypothetical protein             | 33.33 | 213  | MV3986 | TetR family transcriptional regulat  | 99.49 | 198 | BGC_0878C | hypothetical protein              | 33.33 | 213  | MAP3156C | hypothetical protein               | 198 | 100   |
| MAPA_0634 | hypothetical protein                                         | 90  | Rv0194  | Probable transmembrane multidrug        | 33.33 | 1194 | Mb3020C | drug-transport transmembr        | 33.33 | 1194 | MV3985 | hypothetical protein                 | 97.78 | 90  | BGC_0231  | drug-transport transmembr         | 33.33 | 1194 | MAP3155C | hypothetical protein               | 90  | 100   |
| MAPA_0635 | hypothetical protein                                         | 135 | Rv1364C | Possible sigma factor regulatory pr     | 32.04 | 653  | Mb3199C | hypothetical protein             | 32.04 | 653  | MV3984 | hypothetical protein                 | 99.26 | 135 | BGC_1426C | hypothetical protein              | 32.04 | 653  | MAP3093  | inunctional phosphoribosylaminimid | 53  | 30.19 |
| MAPA_0636 | hypothetical protein                                         | 499 | Rv2450  | PF family protein PE17                  | 30.58 | 340  | Mb3173  | PF family protein                | 30.58 | 340  | MV3983 | hypothetical protein                 | 98.38 | 499 | BGC_3154  | PF family protein                 | 30.58 | 340  | MAP3154C | hypothetical protein               | 499 | 100   |
| MAPA_0637 | hypothetical protein                                         | 187 | Rv1794  | hypothetical protein                    | 30.16 | 300  | Mb3189  | hypothetical protein             | 30.16 | 300  | MV3982 | hypothetical protein                 | 98.35 | 187 | BGC_1856C | hypothetical protein              | 30.16 | 300  | MAP3153C | hypothetical protein               | 187 | 100   |
| MAPA_0638 | putative Hcp/Hpl aldolase/citrate lyase                      | 306 | Rv3075C | hypothetical protein                    | 83.99 | 307  | Mb3102C | hypothetical protein             | 83.99 | 307  | MV3981 | Hcp/Hpl aldolase/citrate lyase d     | 99.67 | 306 | BGC_3100C | hypothetical protein              | 83.99 | 307  | MAP3152C | hypothetical protein               | 306 | 100   |
| MAPA_0639 | conserved 13E12 repeat family protein                        | 428 | Rv3074  | hypothetical protein                    | 80.42 | 424  | Mb3101  | hypothetical protein             | 80.42 | 424  | MV3980 | hypothetical protein                 | 99.05 | 419 | BGC_3099  | hypothetical protein              | 80.42 | 424  | MAP3151C | hypothetical protein               | 428 | 100   |
| MAPA_0640 | hypothetical protein                                         | 118 | Rv3073C | hypothetical protein                    | 69.37 | 118  | Mb3100C | hypothetical protein             | 69.37 | 118  | MV3979 | hypothetical protein                 | 97.27 | 110 | BGC_3098C | hypothetical protein              | 69.37 | 118  | MAP3150C | hypothetical protein               | 118 | 100   |
| MAPA_0641 | hypothetical protein                                         | 409 | Rv3147C | Probable transmembrane MntK             | 55.91 | 210  | Mb3182C | hypothetical protein             | 55.91 | 210  | MV3978 | hypothetical protein                 | 95.56 | 409 | BGC_1406C | hypothetical protein              | 55.91 | 210  | MAP3149C | hypothetical protein               | 409 | 100   |
| MAPA_0642 | hypothetical protein                                         | 122 | Rv3070  | Probable conserved integral memb        | 75.63 | 126  | Mb3097  | probable conserved integral memb | 75.63 | 126  | MV3977 | hypothetical protein                 | 99.74 | 122 | BGC_3095  | hypothetical protein              | 75.63 | 126  | MAP3148C | campohr resistance protein Crb     | 122 | 100   |
| MAPA_0643 | hypothetical protein                                         | 132 | Rv3069  | Probable conserved transmembrane        | 84.43 | 132  | Mb3096  | campohr resistance protein Crb   | 84.43 | 132  | MV3976 | campohr resistance protein Crb       | 99.24 | 132 | BGC_3094  | campohr resistance protein Crb    | 84.43 | 132  | MAP3147  | campohr resistance protein Crb     | 132 | 100   |
| MAPA_0644 | phosphoglucosyltransferase                                   | 547 | Rv3068C | Probable phosphoglucosyltransfer        | 86.11 | 547  | Mb3095C | phosphoglucosyltransferase       | 86.11 | 547  | MV4286 | phosphoglucosyltransferase/phosphom  | 26.97 | 542 | BGC_3093C | phosphoglucosyltransferase        | 86.11 | 547  | MAP3146C | phosphoglucosyltransferase         | 547 | 100   |
| MAPA_0645 | putative transporter, major facilitator super family protein | 412 | Rv3728  | Probable conserved two-domain me        | 26.06 | 1065 | Mb3175C | hypothetical protein             | 26.06 | 1065 | MV3975 | permease of the major facilitator s  | 98.69 | 393 | BGC_3788  | hypothetical protein              | 26.06 | 1065 | MAP3145C | hypothetical protein               | 412 | 100   |
| MAPA_0646 | hypothetical protein                                         | 493 | Rv2803  | hypothetical protein                    | 38.71 | 155  | Mb3020C | hypothetical protein             | 38.71 | 155  | MV3974 | hypothetical protein                 | 97.67 | 48  | BGC_2821  | hypothetical protein              | 38.71 | 155  | MAP3144C | hypothetical protein               | 493 | 100   |
| MAPA_0647 | hypothetical protein                                         | 177 | Rv0266C | Probable 5-oxoprolinase OplA (5-ox      | 34.04 | 1209 | Mb3070C | GntR family transcriptional re   | 72.22 | 271  | MV3970 | hypothetical protein                 | 97.87 | 47  | BGC_0201C | GntR family transcriptional regul | 72.22 | 271  | MAP3293  | hypothetical protein               | 177 | 100   |
| MAPA_0648 | hypothetical protein                                         | 424 | Rv3222C | hypothetical protein                    | 39.39 | 470  | Mb2551C | hypothetical protein             | 39.39 | 470  | MV3968 | long chain fatty acyl-CoA synthetase | 96.88 | 64  | BGC_2543C | hypothetical protein              | 39.39 | 470  | MAP3165  | phosphoglycerate kinase            | 415 | 36.17 |
| MAPA_0652 | putative dioxygenases/dioxygenase, rieske (2Fe-2S) do        | 64  | Rv3161C | Possible dioxygenase                    | 31.4  | 382  | Mb3086C | dioxygenase                      | 31.88 | 382  | MV3967 | Rieske (2Fe-2S) domain-containing    | 99.53 | 422 | BGC_3185C | dioxygenase                       | 31.88 | 382  | MAP3141C | hypothetical protein               | 422 | 100   |
| MAPA_0653 | hypothetical protein                                         | 115 | Rv3072C | hypothetical protein                    | 96.16 | 114  | Mb3085C | hypothetical protein             | 96.16 | 114  | MV3966 | hypothetical protein                 | 99.11 | 115 | BGC_3184C | hypothetical protein              | 115   | 100  |          |                                    |     |       |
| MAPA_0654 | putative amidohydrolyase family protein                      | 415 | Rv0074  | hypothetical protein                    | 30.17 | 411  | Mb0076  | hypothetical protein             | 30.17 | 411  | MV3965 | hypothetical protein                 | 53.37 | 405 | BGC_0105  | hypothetical protein              | 30.17 | 411  | MAP3140C | hypothetical protein               | 415 | 100   |
| MAPA_0655 | Transcriptional regulator, MarR family                       | 106 | Rv2887  | Probable transcriptional regulatory p   | 36.28 | 139  | Mb2911  | transcriptional regulator        | 36.28 | 139  | MV3964 | MarR family transcriptional regulat  | 98.67 | 150 | BGC_2908  | transcriptional regulatory pr     | 36.28 | 139  | M        |                                    |     |       |



# Table S1 continued

|           |                                                         |     |        |                                        |       |      |        |                                   |       |      |          |                                      |       |     |          |                                   |       |       |
|-----------|---------------------------------------------------------|-----|--------|----------------------------------------|-------|------|--------|-----------------------------------|-------|------|----------|--------------------------------------|-------|-----|----------|-----------------------------------|-------|-------|
| MAP4_0705 | NADP-dependent alcohol dehydrogenase AdhC               | 346 | Rv0345 | Probable NADP-dependent alcohol dehyd  | 83.82 | 346  | Mb0371 | NADP-dependent alcohol dehyd      | 99.71 | 346  | BCG_3069 | NADP-dependent alcohol dehy          | 83.82 | 346 | MAP3093  | AdhC                              | 346   | 100   |
| MAP4_0706 | FelII/dicrate-binding periplasmic lipoprotein FecB      | 364 | Rv0044 | Probable FelII-dicrate-binding peripl  | 74.19 | 359  | Mb0370 | FelII-dicrate-binding peripla     | 74.19 | 359  | BCG_3068 | FelII-dicrate-binding periplas       | 74.19 | 359 | MAP3092  | hypothetical protein              | 364   | 100   |
| MAP4_0707 | Protonome C oxidase polyphosphate 1 CsdA                | 411 | Rv0342 | Probable protonome C oxidase polyph    | 82.91 | 373  | GC0308 | Cytochrome C oxidase subunit 1    | 82.91 | 373  | BCG_3074 | Cytochrome C oxidase polyphos        | 82.91 | 373 | MAP3094  | CsdA                              | 411   | 99.76 |
| MAP4_0708 | Phosphotriester phosphatase SerB                        | 480 | Rv0342 | Probable phosphotriester phosphatase   | 84.07 | 481  | Mb0366 | phosphotriester phosphatase       | 84.07 | 481  | BCG_3065 | phosphotriester phosphatase          | 84.07 | 481 | MAP3095  | serB                              | 480   | 99.76 |
| MAP4_0709 | ABC transporter ATP-binding protein                     | 280 | Rv0341 | Probable conserved ATP-binding pro     | 89.45 | 287  | Mb0367 | ABC transporter ATP-binding       | 89.45 | 287  | MAY_3906 | myoDerm ABC transporter ATP          | 89.45 | 287 | MAP3098  | hypothetical protein              | 280   | 100   |
| MAP4_0710 | hypothetical protein                                    | 276 | Rv0340 | hypothetical protein                   | 79.78 | 288  | Mb0366 | hypothetical protein              | 79.78 | 288  | MAY_3905 | hydrolyase, nitro family, putat      | 99.28 | 276 | BCG_3064 | hypothetical protein              | 276   | 100   |
| MAP4_0711 | enoyl-CoA hydratase                                     | 257 | Rv0339 | Probable enoyl-CoA hydratase Echa      | 84.77 | 254  | Mb0365 | enoyl-CoA hydratase               | 84.77 | 254  | BCG_3063 | enoyl-CoA hydratase                  | 99.61 | 257 | MAP3088  | enoyl-CoA hydratase               | 257   | 100   |
| MAP4_0712 | putative methyltransferase                              | 323 | Rv0338 | hypothetical protein                   | 84.11 | 327  | Mb0364 | methyltransferases, UbiC/COGS fan | 84.11 | 327  | BCG_3062 | hypothetical protein                 | 100   | 323 | MAP3089  | hypothetical protein              | 323   | 100   |
| MAP4_0713 | hypothetical protein                                    | 327 | Rv0337 | hypothetical protein                   | 76.88 | 358  | Mb0363 | hypothetical protein              | 76.88 | 358  | BCG_3061 | hypothetical protein                 | 96.71 | 391 | BCG_3058 | hypothetical protein              | 327   | 100   |
| MAP4_0714 | conserved secreted protein                              | 227 | Rv0336 | Probable conserved secreted prote      | 71.81 | 227  | Mb0362 | hypothetical protein              | 71.81 | 227  | MAY_3901 | immunogenic protein MPB64/MP1        | 100   | 227 | BCG_3060 | hypothetical protein              | 227   | 100   |
| MAP4_0715 | hypothetical protein                                    | 125 | Rv3454 | Probable conserved integral membr      | 29.41 | 422  | Mb0361 | transmembrane protein             | 29.41 | 561  | MAY_3900 | hypothetical protein                 | 98.25 | 57  | BCG_3519 | hypothetical protein              | 29.41 | 561   |
| MAP4_0716 | hypothetical protein                                    | 423 | Rv0335 | hypothetical protein                   | 79.89 | 360  | Mb0360 | hypothetical protein              | 79.89 | 360  | MAY_3899 | hypothetical protein                 | 99.53 | 423 | BCG_3059 | hypothetical protein              | 372   | 99.73 |
| MAP4_0717 | hypothetical protein                                    | 254 | Rv0334 | Possible transposase                   | 91.67 | 300  | Mb0359 | hypothetical protein              | 91.67 | 300  | MAY_3898 | phosphoglycerate dehydratase         | 100   | 245 | BCG_3058 | transposase                       | 91.67 | 300   |
| MAP4_0718 | deoxythymidylate synthase                               | 442 | Rv3292 | hypothetical protein                   | 31.43 | 415  | Mb3130 | hypothetical protein              | 31.43 | 415  | MAY_3897 | Phr protein                          | 97.96 | 442 | BCG_3321 | hypothetical protein              | 442   | 100   |
| MAP4_0719 | putative tryptophan-rich sensory protein                | 109 | Rv1881 | Possible conserved lipoprotein LppE    | 37.14 | 140  | Mb0358 | periplasmic lipoprotein LppE      | 37.14 | 140  | MAY_3896 | periplasmic lipoprotein LppE         | 76.85 | 90  | BCG_1189 | lipoprotein lppE                  | 37.14 | 140   |
| MAP4_0720 | transmembrane transport protein, Mmpl family            | 687 | Rv1522 | Probable conserved transmembran        | 35.09 | 1146 | Mb0544 | transmembrane transport prot      | 35.09 | 1107 | MAY_3895 | Mmpl family protein                  | 98.84 | 687 | BCG_1574 | transmembrane transport prot      | 35.09 | 1107  |
| MAP4_0721 | putative isopenentenyl pyrophosphate isomerase          | 344 | Rv0694 | Possible L-lactate dehydrogenase (c    | 35.71 | 396  | Mb0713 | L-lactate dehydrogenase (cyto     | 35.71 | 396  | MAY_3894 | isopenentenyl pyrophosphate isom     | 98.26 | 344 | BCG_0743 | L-lactate dehydrogenase (cyto     | 35.71 | 396   |
| MAP4_0722 | transposase                                             | 329 | Rv2812 | Probable transposase                   | 32.65 | 469  | Mb2836 | transposase                       | 32.65 | 469  | MAY_3893 | transposase                          | 82.98 | 345 | BCG_2630 | transposase                       | 32.65 | 469   |
| MAP4_0723 | Transcriptional regulator, MarR family                  | 188 | Rv0880 | Possible transcriptional regulato      | 26.14 | 143  | Mb0904 | MarR family transcriptional regul | 26.14 | 149  | MAY_3891 | MarR family transcriptional regul    | 97.87 | 188 | BCG_0952 | MarR family transcriptional regul | 188   | 100   |
| MAP4_0724 | ribose (12e-2S) domain-containing protein               | 336 | Rv3526 | Oxygenase component of 3-ketose        | 36.42 | 386  | Mb3556 | oxidoreductase                    | 36.42 | 386  | MAY_3891 | methyltransferase                    | 98.51 | 336 | BCG_3590 | oxidoreductase                    | 34.62 | 386   |
| MAP4_0725 | amine oxidase                                           | 509 | Rv2677 | Probable protoporphyrin oxidase        | 33.33 | 452  | Mb2696 | protoporphyrin oxidase            | 33.33 | 452  | MAY_3890 | dehydrogenase                        | 99.21 | 509 | BCG_2690 | protoporphyrin oxidase            | 33.33 | 452   |
| MAP4_0726 | putative methyltransferase, CrT protein                 | 241 | Rv0558 | Probable ubiquinone/menaquinone        | 28.63 | 234  | Mb0375 | ubiquinone/menaquinone            | 28.63 | 234  | MAY_3889 | methyltransferase, UbiC/COGS fan     | 100   | 241 | BCG_0603 | ubiquinone/menaquinone            | 28.63 | 234   |
| MAP4_0727 | hypothetical protein                                    | 103 | Rv0553 | Probable pyruvate or indole-3-pyruv    | 34.85 | 560  | Mb0876 | pyruvate or indole-3-pyruvate     | 34.85 | 560  | MAY_3888 | lysozyme deacetylase                 | 98.06 | 103 | BCG_0905 | pyruvate or indole-3-pyruvate     | 34.85 | 560   |
| MAP4_0728 | hypothetical protein                                    | 117 | Rv0960 | Possible toxin VacA                    | 32.79 | 127  | Mb0985 | hypothetical protein              | 32.79 | 127  | MAY_3887 | hypothetical protein                 | 98.13 | 127 | BCG_1014 | hypothetical protein              | 103   | 100   |
| MAP4_0729 | phytoene synthase                                       | 306 | Rv1397 | Probable phytoene synthase PhvA        | 30.88 | 302  | Mb0340 | phytoene synthase                 | 30.88 | 302  | MAY_3886 | phytoene synthase                    | 99.05 | 316 | BCG_3467 | phytoene synthase phvA            | 30.88 | 302   |
| MAP4_0730 | putative phytoene dehydrogenase                         | 586 | Rv3829 | Probable phytoene dehydrogenase        | 24.13 | 536  | Mb3859 | dehydrogenase                     | 24.13 | 536  | MAY_3885 | phytoene dehydrogenase               | 99.6  | 586 | BCG_3892 | dehydrogenase                     | 24.13 | 536   |
| MAP4_0731 | geranylgeranyl pyrophosphate synthetase                 | 302 | Rv2173 | Probable geranylgeranyl pyrophosp      | 37.42 | 352  | Mb2195 | geranylgeranyl pyrophosphat       | 37.42 | 352  | MAY_3884 | polyvinyl synthetase                 | 98.69 | 392 | BCG_2188 | geranylgeranyl pyrophosphate      | 37.42 | 352   |
| MAP4_0732 | hypothetical protein                                    | 163 | Rv0916 | Possible anti-anti-sigma factor        | 29.13 | 126  | Mb2196 | hypothetical protein              | 29.13 | 126  | MAY_3883 | lysine domain-containing prot        | 99.3  | 143 | BCG_1858 | hypothetical protein              | 29.13 | 126   |
| MAP4_0733 | hypothetical protein                                    | 214 | Rv1815 | hypothetical protein                   | 42.11 | 221  | Mb1816 | hypothetical protein              | 42.11 | 221  | MAY_3882 | hypothetical protein                 | 98.46 | 249 | BCG_1841 | hypothetical protein              | 214   | 100   |
| MAP4_0734 | hypothetical protein                                    | 239 | Rv3164 | Probable methanol dehydrogenase tra    | 28.57 | 320  | Mb3881 | methanol dehydrogenase tra        | 28.57 | 320  | MAY_3881 | hypothetical protein                 | 97.26 | 233 | BCG_3188 | methanol dehydrogenase tra        | 28.57 | 320   |
| MAP4_0735 | putative nucleoside-diphosphate sugar epimerase         | 451 | Rv2216 | hypothetical protein                   | 45.67 | 301  | Mb2239 | hypothetical protein              | 45.67 | 301  | MAY_3880 | nucleoside-diphosphate sugar epim    | 97.29 | 443 | BCG_2232 | hypothetical protein              | 45.67 | 301   |
| MAP4_0736 | transferase                                             | 418 | Rv0332 | Alpha (1-4) glycosyltransferase        | 87.08 | 414  | Mb0358 | transferase                       | 87.08 | 414  | MAY_3879 | glycosyl transferase, group 1 family | 99.29 | 418 | BCG_3055 | transferase                       | 87.08 | 414   |
| MAP4_0737 | hypothetical protein                                    | 534 | Rv0331 | hypothetical protein                   | 86.53 | 526  | Mb0357 | hypothetical protein              | 86.53 | 526  | MAY_3878 | glycosyl transferase, family 3       | 99.49 | 392 | BCG_3046 | hypothetical protein              | 534   | 100   |
| MAP4_0738 | hypothetical protein                                    | 274 | Rv0330 | hypothetical protein                   | 76.26 | 274  | Mb0356 | hypothetical protein              | 76.26 | 274  | MAY_3877 | hypothetical protein                 | 98.18 | 274 | BCG_3053 | hypothetical protein              | 274   | 100   |
| MAP4_0739 | Electron transfer flavoprotein, beta subunit            | 263 | Rv0329 | Probable electron transfer flavoprot   | 92.11 | 266  | Mb0355 | electron transfer flavoprotein    | 92.11 | 266  | MAY_3876 | electron transfer protein, beta sub  | 100   | 263 | BCG_3052 | electron transfer flavoprotein    | 92.11 | 266   |
| MAP4_0740 | Electron transfer flavoprotein, alpha subunit           | 318 | Rv0328 | Probable electron transfer flavoprot   | 91.19 | 318  | Mb0354 | electron transfer flavoprotein    | 90.88 | 318  | MAY_3875 | electron transfer flavoprotein, alph | 99.36 | 311 | BCG_3051 | electron transfer flavoprotein    | 90.88 | 318   |
| MAP4_0741 | putative acetyltransferase                              | 281 | Rv0327 | GCN5-related N-acetyltransferase       | 80.29 | 281  | Mb0353 | hypothetical protein              | 80.33 | 246  | MAY_3874 | hypothetical protein                 | 99.29 | 281 | BCG_3050 | hypothetical protein              | 281   | 100   |
| MAP4_0742 | lysine desulfurase IscS                                 | 312 | Rv0256 | Probable lysine desulfurase IscS (NifS | 85.3  | 393  | Mb0256 | lysine desulfurase                | 85.3  | 393  | MAY_3873 | lysine desulfurase                   | 99.49 | 392 | BCG_3048 | lysine desulfurase iscS           | 85.3  | 393   |
| MAP4_0743 | RNAse, methyltransferase, MnmA                          | 394 | Rv0324 | Probable RNA (5-methylthio) methyl     | 85.15 | 367  | Mb0352 | RNA-specific 2-thiouridylylase    | 85.15 | 367  | MAY_3872 | RNA-specific 2-thiouridylylase Mnm   | 99.49 | 392 | BCG_3047 | RNA-specific 2-thiouridylylase    | 85.15 | 367   |
| MAP4_0744 | lipoprotein LppA                                        | 652 | Rv0316 | Probable lipoprotein LppA              | 65.02 | 209  | Mb0341 | lipoprotein LppA                  | 65.02 | 209  | MAY_3871 | LppA protein                         | 27.27 | 99  | BCG_3038 | lipoprotein lppA                  | 65.02 | 209   |
| MAP4_0745 | putative cobalamin-independent methionine synthase      | 342 | Rv0315 | DNA ligase                             | 77.84 | 337  | Mb0340 | hypothetical protein              | 77.84 | 337  | MAY_3869 | methionine synthase, vitamin-B12     | 100   | 342 | BCG_3037 | hypothetical protein              | 342   | 100   |
| MAP4_0746 | NAD-dependent DNA ligase LigA                           | 693 | Rv0314 | DNA ligase [NAD dependent] LigA (e     | 81.37 | 691  | Mb0339 | NAD-dependent DNA ligase LigA     | 81.37 | 691  | MAY_3868 | NAD-dependent DNA ligase LigA        | 99.71 | 693 | BCG_3036 | NAD-dependent DNA ligase LigA     | 81.37 | 691   |
| MAP4_0747 | lysathionine gamma-lyase                                | 200 | Rv0279 | Cystathionine gamma-lyase MetC         | 39.7  | 288  | Mb0279 | cystathionine gamma-synth         | 39.7  | 288  | MAY_3867 | lysathionine gamma-lyase             | 98.92 | 200 | BCG_1137 | cystathionine gamma-lyase         | 200   | 100   |
| MAP4_0748 | Transcriptional regulator, TetR family                  | 200 | Rv1556 | Probable regulatory protein            | 77.78 | 202  | Mb1543 | regulatory protein                | 77.78 | 202  | MAY_3866 | TetR family transcriptional regulat  | 100   | 196 | BCG_2007 | regulatory protein                | 200   | 100   |
| MAP4_0749 | putative pyridoxime 5'-phosphate oxidase family protein | 172 | Rv0291 | Probable regulatory protein            | 24.05 | 163  | Mb0351 | hypothetical protein              | 24.05 | 163  | MAY_3865 | pyridoxime 5'-phosphate oxidase      | 100   | 172 | BCG_3012 | hypothetical protein              | 172   | 100   |
| MAP4_0751 | putative transmembrane transport protein Mmpl2          | 972 | Rv0450 | Probable conserved transmembran        | 75.03 | 967  | Mb0353 | transmembrane transport pro       | 75.03 | 967  | MAY_3863 | Mmpl2 protein                        | 100   | 972 | BCG_1609 | transmembrane transport prot      | 75.03 | 967   |
| MAP4_0752 | hypothetical protein                                    | 144 | Rv1031 | Putative cell division protein FtsX (e | 25    | 297  | Mb1288 | cell division protein FtsX        | 25    | 297  | MAY_3862 | hypothetical protein                 | 100   | 144 | BCG_3126 | cell division protein ftsX        | 25    | 297   |
| MAP4_0753 | hypothetical protein                                    | 223 | Rv1031 | hypothetical protein                   | 87.06 | 248  | Mb1031 | hypothetical protein              | 87.06 | 248  | MAY_3861 | lysine domain-containing prot        | 99.49 | 392 | BCG_3046 | hypothetical protein              | 223   | 100   |
| MAP4_0754 | aspartylglutamyl-RNA amidotransferase subunitC          | 491 | Rv0312 | Probable glutamyl-RNA (GLN) amid       | 80.96 | 494  | Mb0336 | aspartylglutamyl-RNA amid         | 80.96 | 494  | MAY_3860 | aspartylglutamyl-RNA amidotran       | 99.49 | 491 | BCG_3034 | aspartylglutamyl-RNA amidotran    | 491   | 100   |
| MAP4_0755 | aspartylglutamyl-RNA amidotransferase subunitA          | 499 | Rv0311 | Probable glutamyl-RNA (GLN) amid       | 80.99 | 494  | Mb0335 | aspartylglutamyl-RNA amid         | 80.99 | 494  | MAY_3859 | aspartylglutamyl-RNA amidotran       | 99.49 | 494 | BCG_3033 | aspartylglutamyl-RNA amidotran    | 499   | 100   |
| MAP4_0756 | 6-phosphofructokinase                                   | 343 | Rv0310 | Probable 6-phosphofructokinase Pfk     | 93.29 | 343  | Mb0334 | 6-phosphofructokinase             | 93.29 | 343  | MAY_3858 | 6-phosphofructokinase                | 100   | 343 | BCG_3032 | 6-phosphofructokinase             | 343   | 100   |
| MAP4_0757 | hypothetical protein                                    | 388 | Rv0309 | hypothetical protein                   | 38.67 | 405  | Mb0343 | hypothetical protein              | 38.67 | 405  | MAY_3857 | hypothetical protein                 | 98.13 | 375 | BCG_0573 | hypothetical protein              | 388   | 100   |
| MAP4_0758 | glutamyl-RNA (GLN) amidotransferase subunit BGatB       | 509 | Rv0308 | Probable glutamyl-RNA (GLN) amid       | 80.93 | 509  | Mb0332 | aspartylglutamyl-RNA amid         | 80.93 | 509  | MAY_3856 | aspartylglutamyl-RNA amidotran       | 99.49 | 509 | BCG_3031 | aspartylglutamyl-RNA amidotran    | 509   | 100   |
| MAP4_0759 | lipoprotein LppZ                                        | 400 | Rv0306 | Probable conserved lipoprotein Lpp     | 91.28 | 373  | Mb0311 | lipoprotein LppZ                  | 91.28 | 373  | MAY_3855 | lipoprotein lppZ                     | 99.72 | 356 | BCG_3028 | lipoprotein lppZ                  | 400   | 100   |
| MAP4_0760 | hypothetical protein                                    | 286 | Rv0305 | hypothetical protein                   | 70.28 | 279  | Mb0354 | hypothetical protein              | 70.28 | 279  | MAY_3854 | DoxB subfamily protein, putative     | 99.3  | 285 | BCG_3027 | hypothetical protein              | 286   | 100   |
| MAP4_0761 | Low molecular weight protein antigen 6                  | 119 | Rv3004 | Low molecular weight protein antigen   | 79.46 | 112  | Mb0329 | low molecular weight protein      | 79.46 | 112  | MAY_3853 | low molecular weight protein anti    | 98.26 | 115 | BCG_3026 | low molecular weight protein      | 79.46 | 112   |
| MAP4_0762 | acetylacolate synthase large subunit                    | 622 | Rv0303 | Acetylacolate synthase (large subun    | 87.82 | 618  | Mb0328 | acetylacolate synthase 1 catal    |       |      |          |                                      |       |     |          |                                   |       |       |

# Table S1 continued

|           |                                                     |       |         |                                                                                        |       |      |          |                                              |       |      |          |                                                         |       |      |           |                                              |                      |       |         |                                         |                      |       |     |
|-----------|-----------------------------------------------------|-------|---------|----------------------------------------------------------------------------------------|-------|------|----------|----------------------------------------------|-------|------|----------|---------------------------------------------------------|-------|------|-----------|----------------------------------------------|----------------------|-------|---------|-----------------------------------------|----------------------|-------|-----|
| MAP4_0803 | putative integral membrane protein                  | 387   | Rv2963  | Probable integral membrane protein                                                     | 81.17 | 406  | Mb2987   | hypothetical protein                         | 81.17 | 406  | MbV_3787 | hypothetical protein                                    | 99.22 | 387  | BCG_2984  | MAP2999                                      | hypothetical protein | 81.17 | 406     | MAP2999                                 | hypothetical protein | 268   | 100 |
| MAP4_0804 | hypothetical protein                                | 288   | Rv1832  | 1-acylglycerol-3-phosphate O-acyltransferase                                           | 50    | 247  | Mb204c   | 1-acylglycerol-3-phosphate O-acyltransferase | 50    | 247  | MbV_3786 | hypothetical protein                                    | 99.01 | 326  | BCG_2197c | 1-acylglycerol-3-phosphate O-acyltransferase | 50                   | 247   | MAP2998 | hypothetical protein                    | 268                  | 100   |     |
| MAP4_0805 | hypothetical protein                                | 245   | Rv2974  | hypothetical protein                                                                   | 89.47 | 245  | Mb295c   | hypothetical protein                         | 89.47 | 245  | MbV_3785 | hypothetical protein                                    | 99.48 | 245  | BCG_2983  | hypothetical protein                         | 89.47                | 245   | MAP2997 | hypothetical protein                    | 245                  | 100   |     |
| MAP4_0806 | hypothetical protein                                | 207   | Rv2975  | hypothetical protein                                                                   | 69.67 | 207  | Mb295b   | hypothetical protein                         | 69.67 | 207  | MbV_3784 | hypothetical protein                                    | 99.44 | 207  | BCG_2948c | hypothetical protein                         | 69.67                | 207   | MAP2996 | hypothetical protein                    | 209                  | 100   |     |
| MAP4_0807 | ribonuclease III Rnc                                | 237   | Rv2925c | Probable ribonuclease III Rnc (RNase)                                                  | 89.12 | 240  | MbV_3783 | ribonuclease III                             | 89.12 | 240  | MbV_3783 | ribonuclease III                                        | 99.28 | 237  | BCG_2947  | ribonuclease III                             | 89.12                | 240   | MAP2995 | ribonuclease III                        | 237                  | 100   |     |
| MAP4_0808 | formamidopyrimidine-DNA glycosylase                 | 283   | Rv2924c | Probable formamidopyrimidine-DNA glycosylase                                           | 83.68 | 289  | Mb2944c  | formamidopyrimidine-DNA glycosylase          | 83.68 | 289  | MbV_3782 | formamidopyrimidine-DNA glycosylase                     | 95.41 | 283  | BCG_2946c | formamidopyrimidine-DNA glycosylase          | 83.68                | 289   | MAP2994 | formamidopyrimidine-DNA glycosylase     | 283                  | 100   |     |
| MAP4_0809 | GCN5-Pi de-N-acetylase family protein               | 258   | Rv1082  | Mycobactin conjugate amidase                                                           | 30.2  | 288  | Mb1111   | mycobactin conjugate amidase                 | 30.2  | 288  | MbV_3781 | GCN5-Pi de-N-acetylase                                  | 100   | 258  | BCG_1140  | mycobactin conjugate amidase                 | 30.2                 | 288   | MAP2993 | formamidopyrimidine-DNA glycosylase     | 258                  | 100   |     |
| MAP4_0810 | hypothetical protein                                | 141   | Rv2973a | hypothetical protein                                                                   | 76.03 | 137  | MbV_3780 | hypothetical protein                         | 76.03 | 137  | MbV_3780 | hypothetical protein                                    | 98.31 | 118  | BCG_2945c | hypothetical protein                         | 76.03                | 137   | MAP2992 | hypothetical protein                    | 141                  | 100   |     |
| MAP4_0811 | acylphosphatase                                     | 97    | Rv2924  | Probable acylphosphatase                                                               | 75.26 | 93   | Mb2947c  | acylphosphatase                              | 75.26 | 93   | MbV_3779 | acylphosphatase                                         | 100   | 97   | BCG_2944c | acylphosphatase                              | 75.26                | 93    | MAP2991 | hypothetical protein                    | 97                   | 100   |     |
| MAP4_0812 | chromosome partition protein Smc                    | 1196  | Rv2922c | Probable chromosome partition protein                                                  | 83.97 | 1205 | Mb2946c  | chromosome partition protein                 | 83.97 | 1205 | MbV_3777 | chromosome segregation protein                          | 99.41 | 1196 | BCG_2938  | chromosome partition protein                 | 83.97                | 1205  | MAP2990 | hypothetical protein                    | 1236                 | 99.83 |     |
| MAP4_0813 | cell division protein FtsY                          | 444   | Rv2921c | Probable cell division protein FtsY                                                    | 83.78 | 422  | Mb2945c  | cell division protein FtsY                   | 83.78 | 422  | MbV_3776 | signal recognition particle-docking                     | 94.82 | 428  | BCG_2942c | cell division protein ftsY                   | 83.78                | 422   | MAP2989 | hypothetical protein                    | 444                  | 100   |     |
| MAP4_0814 | ammonium-transport membrane protein Amt             | 479   | Rv2920c | Probable ammonium-transport protein                                                    | 85.65 | 477  | Mb2944c  | ammonium transporter                         | 85.65 | 477  | MbV_3775 | ammonium transporter                                    | 99.79 | 477  | BCG_2941c | ammonium-transport integral                  | 85.65                | 477   | MAP2988 | Amt 2                                   | 479                  | 100   |     |
| MAP4_0815 | nitrogen regulatory protein P-II                    | 814   | Rv2919c | Probable nitrogen regulatory protein                                                   | 98.21 | 112  | Mb2943c  | nitrogen regulatory protein P-II             | 98.21 | 112  | MbV_3774 | nitrogen regulatory protein P-II                        | 100   | 814  | BCG_2940c | nitrogen regulatory protein P-II             | 98.21                | 112   | MAP2987 | GlnB                                    | 112                  | 100   |     |
| MAP4_0816 | protein-pi-uridylyltransferase GlnD                 | 519   | Rv2918c | Probable [protein-pi-uridylyltransferase]                                              | 75.65 | 808  | Mb2942c  | Pi-uridylyltransferase                       | 75.65 | 808  | MbV_3773 | Pi-uridylyltransferase                                  | 99.63 | 814  | BCG_2939c | Pi-uridylyltransferase                       | 75.65                | 808   | MAP2986 | Pi-uridylyltransferase                  | 814                  | 100   |     |
| MAP4_0817 | hypothetical protein                                | 112   | Rv2917  | Conserved hypothetical alanine and putative hydrolyase, alpha-beta fold family protein | 83.13 | 626  | Mb2941   | hypothetical protein                         | 83.13 | 626  | MbV_3772 | DNA or RNA helicase of superfamily alpha/beta hydrolase | 99.31 | 579  | BCG_2938  | hypothetical protein                         | 83.13                | 626   | MAP2985 | hypothetical protein                    | 590                  | 99.83 |     |
| MAP4_0818 | putative hydrolyase, alpha-beta fold family protein | 263   | Rv10134 | Possible epoxide hydrolase                                                             | 28.11 | 300  | Mb3502c  | peroxidase BpoA                              | 34.95 | 261  | MbV_3771 | alpha/beta hydrolase                                    | 99.62 | 263  | BCG_3538c | peroxidase bpoA                              | 34.95                | 261   | MAP2984 | hypothetical protein                    | 263                  | 100   |     |
| MAP4_0819 | signal recognition particle protein Ffh             | 517   | Rv2916c | Probable signal recognition particle                                                   | 88.57 | 525  | Mb2940c  | signal recognition particle protein          | 88.57 | 525  | MbV_3770 | signal recognition particle protein                     | 99.42 | 517  | BCG_2937c | signal recognition particle protein          | 88.57                | 525   | MAP2983 | hypothetical protein                    | 517                  | 100   |     |
| MAP4_0820 | aminoalcohol aminohydrolyase                        | 363   | Rv2915c | Probable aminoalcohol aminohydrolyase                                                  | 79.14 | 370  | Mb2939c  | aminoalcohol hydrolyase                      | 79.14 | 370  | MbV_3769 | aminoalcohol hydrolyase                                 | 99.72 | 363  | BCG_2936c | aminoalcohol hydrolyase                      | 79.14                | 370   | MAP2982 | hypothetical protein                    | 363                  | 100   |     |
| MAP4_0821 | D-amino acid aminohydrolyase                        | 620   | Rv2913c | Possible D-amino acid aminohydrolyase                                                  | 84.51 | 611  | Mb2937c  | D-amino acid aminohydrolyase                 | 84.51 | 611  | MbV_3768 | beta-D-glutamylase aminohydrolyase                      | 98    | 603  | BCG_2934c | D-amino acid aminohydrolyase                 | 84.51                | 611   | MAP2981 | hypothetical protein                    | 620                  | 100   |     |
| MAP4_0822 | Transcriptional regulator, TetR family              | 197   | Rv2912c | Probable transcriptional regulatory protein                                            | 78.46 | 195  | Mb2936c  | TetR family transcriptional regulator        | 78.46 | 195  | MbV_3767 | TetR family transcriptional regulator                   | 98.98 | 197  | BCG_2933c | TetR family transcriptional regulator        | 78.46                | 195   | MAP2980 | hypothetical protein                    | 197                  | 99.49 |     |
| MAP4_0823 | D-alanyl-D-alanine carboxypeptidase                 | 289   | Rv2911  | Probable penicillin-binding protein                                                    | 85.4  | 291  | Mb2935   | D-alanyl-D-alanine carboxypeptidase          | 85.4  | 291  | MbV_3766 | D-alanyl-D-alanine carboxypeptidase                     | 100   | 289  | BCG_2932  | D-alanyl-D-alanine carboxypeptidase          | 85.4                 | 291   | MAP2979 | OaC8                                    | 289                  | 100   |     |
| MAP4_0824 | hypothetical protein                                | 139   | Rv2910c | hypothetical protein                                                                   | 82.73 | 147  | Mb2934c  | hypothetical protein                         | 82.73 | 147  | MbV_3765 | hypothetical protein                                    | 100   | 139  | BCG_2931c | hypothetical protein                         | 82.73                | 147   | MAP2978 | hypothetical protein                    | 139                  | 100   |     |
| MAP4_0825 | 30S ribosomal protein S16                           | 171   | Rv2909c | 30S ribosomal protein S16 Rbp                                                          | 76.61 | 162  | Mb2933c  | 30S ribosomal protein S16                    | 76.61 | 162  | MbV_3764 | 30S ribosomal protein S16                               | 100   | 171  | BCG_2930c | 30S ribosomal protein S16                    | 76.61                | 162   | MAP2977 | 30S ribosomal protein S16               | 171                  | 100   |     |
| MAP4_0826 | putative RNA-binding protein                        | 80    | Rv2908c | hypothetical protein                                                                   | 96.25 | 80   | Mb2932c  | hypothetical protein                         | 96.25 | 80   | MbV_3763 | hypothetical protein                                    | 100   | 80   | BCG_2929c | hypothetical protein                         | 96.25                | 80    | MAP2976 | hypothetical protein                    | 80                   | 100   |     |
| MAP4_0827 | 16S rRNA processing protein RimM                    | 175   | Rv2907c | Probable 16S rRNA processing protein                                                   | 72.63 | 176  | Mb2931c  | 16S rRNA-processing protein                  | 72.63 | 176  | MbV_3762 | 16S rRNA-processing protein RimM                        | 99.43 | 175  | BCG_2928c | 16S rRNA-processing protein RimM             | 72.63                | 176   | MAP2975 | 16S rRNA-processing protein RimM        | 175                  | 100   |     |
| MAP4_0828 | tRNA-methyltransferase                              | 239   | Rv2906c | Probable tRNA (guanine-N1)-methyltransferase                                           | 88.94 | 230  | Mb2930c  | tRNA (guanine-N1)-methyltransferase          | 88.94 | 230  | MbV_3761 | tRNA (guanine-N1)-methyltransferase                     | 98.74 | 239  | BCG_2927c | tRNA (guanine-N1)-methyltransferase          | 88.94                | 230   | MAP2974 | tRNA (guanine-N1)-methyltransferase     | 239                  | 100   |     |
| MAP4_0829 | alanine rich lipoprotein LppW                       | 322   | Rv2905  | Probable conserved alanine rich lipoprotein                                            | 70.13 | 314  | Mb2929c  | lipoprotein LppW                             | 70.13 | 314  | MbV_3760 | LppW protein                                            | 100   | 322  | BCG_2926  | alanine rich lipoprotein lppW                | 70.13                | 314   | MAP2973 | hypothetical protein                    | 322                  | 100   |     |
| MAP4_0830 | 50S ribosomal protein L19 Rps                       | 113   | Rv2904c | 50S ribosomal protein L19 Rps                                                          | 99.92 | 113  | Mb2928c  | 50S ribosomal protein L19                    | 99.92 | 113  | MbV_3759 | 50S ribosomal protein L19                               | 99.92 | 113  | BCG_2925c | 50S ribosomal protein L19                    | 99.92                | 113   | MAP2972 | 50S ribosomal protein L19               | 113                  | 100   |     |
| MAP4_0831 | signal peptidase I                                  | 299   | Rv2903c | Probable signal peptidase I                                                            | 71.05 | 294  | Mb2927c  | signal peptidase I                           | 71.05 | 294  | MbV_3758 | signal peptidase I                                      | 100   | 299  | BCG_2924c | signal peptidase I                           | 71.05                | 294   | MAP2971 | hypothetical protein                    | 299                  | 100   |     |
| MAP4_0832 | Ribonuclease HII                                    | 263   | Rv2902c | Probable ribonuclease HII protein                                                      | 84.12 | 264  | Mb2926c  | Ribonuclease HII                             | 84.12 | 264  | MbV_3757 | Ribonuclease HII                                        | 99.57 | 263  | BCG_2923c | Ribonuclease HII                             | 84.12                | 264   | MAP2970 | Ribonuclease HII                        | 263                  | 100   |     |
| MAP4_0833 | hypothetical protein                                | 101   | Rv2901c | hypothetical protein                                                                   | 97.03 | 101  | Mb2925c  | hypothetical protein                         | 97.03 | 101  | MbV_3756 | hypothetical protein                                    | 100   | 101  | BCG_2922c | hypothetical protein                         | 97.03                | 101   | MAP2969 | hypothetical protein                    | 101                  | 100   |     |
| MAP4_0834 | hypothetical protein                                | 256   | Rv1826  | Probable two-component system transducer                                               | 28.33 | 205  | Mb1652   | two-component system transducer              | 28.33 | 205  | MbV_3755 | ANTAR domain-containing protein                         | 99.22 | 256  | BCG_1664  | two-component system transducer              | 28.33                | 205   | MAP2968 | hypothetical protein                    | 256                  | 100   |     |
| MAP4_0835 | UDP-glucose 4-epimerase GafK                        | 329   | Rv2900c | Probable UDP-glucose 4-epimerase                                                       | 25.76 | 376  | Mb2924c  | UDP-glucose 4-epimerase                      | 25.76 | 376  | MbV_3754 | UDP-glucose 4-epimerase                                 | 99.69 | 327  | BCG_2921c | UDP-glucose 4-epimerase GafK                 | 25.76                | 376   | MAP2967 | hypothetical protein                    | 329                  | 100   |     |
| MAP4_0836 | formate dehydrogenase accessory protein             | 319   | Rv2899c | Possible formate dehydrogenase accessory protein                                       | 74.17 | 278  | Mb2923c  | formate dehydrogenase accessory protein      | 74.17 | 278  | MbV_3753 | formate dehydrogenase accessory protein                 | 99.23 | 319  | BCG_2920c | formate dehydrogenase accessory protein      | 74.17                | 278   | MAP2966 | formate dehydrogenase accessory protein | 319                  | 100   |     |
| MAP4_0837 | hypothetical protein                                | 98    | Rv2898c | hypothetical protein                                                                   | 83.67 | 128  | Mb2922c  | hypothetical protein                         | 83.67 | 128  | MbV_3752 | hypothetical protein                                    | 99.63 | 128  | BCG_2919c | hypothetical protein                         | 83.67                | 128   | MAP2965 | hypothetical protein                    | 98                   | 100   |     |
| MAP4_0838 | phage integrase family protein                      | 313   | Rv1701  | Probable phage integrase/recombinase                                                   | 34.15 | 311  | Mb1727   | site-specific tyrosine recombinase           | 34.15 | 311  | MbV_3070 | site-specific tyrosine recombinase                      | 35.12 | 313  | BCG_1739  | site-specific tyrosine recombinase           | 34.15                | 311   | MAP2964 | hypothetical protein                    | 313                  | 100   |     |
| MAP4_0839 | magnesium chelatase family protein                  | 503   | Rv2897c | hypothetical protein                                                                   | 87.67 | 503  | Mb2921c  | hypothetical protein                         | 87.67 | 503  | MbV_3751 | Mg-chelatase subunit D/I family protein                 | 99.6  | 503  | BCG_2918c | hypothetical protein                         | 87.67                | 503   | MAP2963 | hypothetical protein                    | 503                  | 100   |     |
| MAP4_0840 | hypothetical protein                                | 367   | Rv2788  | Probable aldehyde dehydrogenase                                                        | 36.67 | 489  | MbV_3750 | aldehyde dehydrogenase                       | 36.67 | 489  | MbV_3750 | aldehyde dehydrogenase                                  | 99.67 | 367  | BCG_2917c | aldehyde dehydrogenase AldA                  | 36.67                | 489   | MAP2962 | hypothetical protein                    | 367                  | 100   |     |
| MAP4_0841 | DNA recombination-mediator protein, Smf family      | 283   | Rv2896c | hypothetical protein                                                                   | 77.66 | 283  | Mb2920c  | hypothetical protein                         | 77.66 | 283  | MbV_3749 | hypothetical protein                                    | 99.23 | 283  | BCG_2916c | hypothetical protein                         | 77.66                | 283   | MAP2961 | hypothetical protein                    | 283                  | 100   |     |
| MAP4_0842 | mycobactin utilization protein                      | 81.79 | Rv2895c | Probable mycobactin utilization protein                                                | 81.79 | 283  | MbV_3748 | siderophore utilization protein              | 81.79 | 283  | MbV_3748 | siderophore utilization protein                         | 100   | 283  | BCG_2915c | mycobactin utilization protein               | 81.79                | 283   | MAP2960 | YiuB                                    | 311                  | 99.57 |     |
| MAP4_0843 | Lactate 2-monooxygenase                             | 386   | Rv2904  | Probable L-lactate dehydrogenase                                                       | 35.39 | 396  | Mb0713   | L-lactate dehydrogenase (cytochrome c)       | 35.39 | 396  | MbV_3747 | lactate 2-monooxygenase                                 | 99.48 | 386  | BCG_0743  | L-lactate dehydrogenase (cytochrome c)       | 35.39                | 396   | MAP2959 | hypothetical protein                    | 386                  | 100   |     |
| MAP4_0844 | integrate 2-oxoacids                                | 301   | Rv2934c | Probable integrate 2-oxoacids                                                          | 84.18 | 298  | Mb2938c  | site-specific tyrosine recombinase           | 84.18 | 298  | MbV_3746 | site-specific tyrosine recombinase                      | 99.67 | 301  | BCG_2913c | site-specific tyrosine recombinase           | 84.18                | 298   | MAP2958 | site-specific tyrosine recombinase XerC | 301                  | 100   |     |
| MAP4_0845 | MD3 peptidase domain-containing protein             | 175   | Rv2891  | Probable MD3 peptidase domain-containing protein                                       | 72.22 | 249  | Mb2917   | MD3 peptidase domain-containing protein      | 72.22 | 249  | MbV_3745 | MD3 peptidase domain-containing protein                 | 99.01 | 169  | BCG_2912c | MD3 peptidase domain-containing protein      | 72.22                | 249   | MAP2957 | hypothetical protein                    | 175                  | 100   |     |
| MAP4_0846 | 30S ribosomal protein S2 RpsB                       | 276   | Rv2890c | 30S ribosomal protein S2 RpsB                                                          | 91.64 | 267  | Mb2916c  | 30S ribosomal protein S2                     | 91.64 | 267  | MbV_3744 | 30S ribosomal protein S2                                | 100   | 276  | BCG_2911c | 30S ribosomal protein S2                     | 91.64                | 267   | MAP2956 | 30S ribosomal protein S2                | 276                  | 100   |     |
| MAP4_0847 | Translation elongation factor Ts                    | 167   | Rv2889c | Probable elongation factor Ts (EFTs)                                                   | 89.09 | 271  | Mb2913c  | elongation factor Ts                         | 89.09 | 271  | MbV_3743 | elongation factor Ts                                    | 99.64 | 275  | BCG_2910c | elongation factor Ts                         | 89.09                | 271   | MAP2955 | elongation factor Ts                    | 167                  | 100   |     |
| MAP4_0848 | Transcriptional regulator, MarR family              | 471   | Rv2888c | Probable transcriptional regulatory protein                                            | 76.22 | 473  | Mb2912c  | amidase                                      | 76.22 | 473  | MbV_3742 | 6-aminohexanoate-cyclic-dimer hydrolase                 | 35.22 | 492  | BCG_2909c | amidase                                      | 76.22                | 473   | MAP2954 | amidase                                 | 471                  | 100   |     |
| MAP4_0849 | hypothetical protein                                | 140   | Rv2887  | Probable transcriptional regulatory protein                                            | 78.42 | 139  | Mb2921c  | transcriptional regulator                    | 78.42 | 139  | MbV_3741 | Mar                                                     |       |      |           |                                              |                      |       |         |                                         |                      |       |     |

# Table S1 continued

|           |                                                         |      |         |                                                      |       |      |         |                                 |       |      |          |                                     |       |      |           |                                     |       |      |          |                                          |      |       |
|-----------|---------------------------------------------------------|------|---------|------------------------------------------------------|-------|------|---------|---------------------------------|-------|------|----------|-------------------------------------|-------|------|-----------|-------------------------------------|-------|------|----------|------------------------------------------|------|-------|
| MAP4_D902 | enoyl-CoA hydratase                                     | 249  | Rv2831  | enoyl-CoA hydratase Echa                             | 88.35 | 249  | Mb2855  | enoyl-CoA hydratase             | 87.95 | 249  | Mb2855   | enoyl-CoA hydratase                 | 99.2  | 249  | BCG_2851  | enoyl-CoA hydratase                 | 88.35 | 249  | MAP2904  | enoyl-CoA hydratase                      | 249  | 100   |
| MAP4_D903 | hypothetical protein                                    | 89   | Rv2828A | hypothetical protein                                 | 83.15 | 89   | Mb0813c | hypothetical protein            | 38.89 | 149  | MbV_3688 | hypothetical protein                | 95.51 | 89   | BCG_2848b | hypothetical protein                | 83.15 | 89   | MAP1566  | hypothetical protein                     | 347  | 74.71 |
| MAP4_D904 | hypothetical protein                                    | 196  | Rv2828b | hypothetical protein                                 | 61.67 | 191  | Mb2855  | hypothetical protein            | 81.11 | 191  | MbV_3688 | hypothetical protein                | 99.2  | 196  | BCG_2847c | hypothetical protein                | 61.67 | 196  | MAP2903  | hypothetical protein                     | 196  | 100   |
| MAP4_D905 | hypothetical protein                                    | 575  | Rv2800  | possible hydrolase                                   | 71.17 | 549  | Mb2823  | hypothetical protein            | 71.17 | 549  | MbV_3575 | hydrolase CseE/NonD family prote    | 99.3  | 575  | BCG_2818  | hypothetical protein                | 71.17 | 549  | MAP2902  | hypothetical protein                     | 575  | 100   |
| MAP4_D906 | membrane protein                                        | 196  | Rv2799  | Probable membrane protein                            | 73.1  | 209  | Mb2822  | hypothetical protein            | 73.23 | 210  | MbV_3685 | hypothetical protein                | 99.3  | 196  | BCG_2817  | hypothetical protein                | 73.1  | 209  | MAP2901  | hypothetical protein                     | 217  | 99.49 |
| MAP4_D907 | hypothetical protein                                    | 329  | Rv2795c | hypothetical protein                                 | 88.75 | 324  | Mb2818c | hypothetical protein            | 88.75 | 324  | MbV_3684 | metallophosphoesterase              | 99.38 | 321  | BCG_2813c | hypothetical protein                | 88.75 | 324  | MAP2900  | hypothetical protein                     | 329  | 100   |
| MAP4_D908 | putative phosphoantithieryl transferase family protein  | 2.25 | Rv2794c | Phosphoantithieryl transferase Pz                    | 80.44 | 2.27 | Mb2817c | hypothetical protein            | 80.89 | 2.27 | MbV_3683 | 5p-type phosphoantithieryl tran     | 99.11 | 2.25 | BCG_2812c | hypothetical protein                | 80.89 | 2.27 | MAP2899c | hypothetical protein                     | 2.25 | 100   |
| MAP4_D909 | putative RNA polymerase sigma factor SigB               | 293  | Rv2793c | Probable RNA polymerase sigma factor                 | 75.85 | 293  | Mb2816c | RNA polymerase sigma factor     | 75.85 | 298  | MbV_3682 | RNA polymerase sigma factor         | 99.2  | 293  | BCG_2811c | RNA polymerase sigma factor         | 75.85 | 298  | MAP2898c | RNA polymerase sigma factor              | 293  | 100   |
| MAP4_D910 | lipid-transfer protein                                  | 398  | Rv2790c | Probable lipid-transfer protein lipA                 | 86.84 | 401  | Mb2813c | lipid-transfer protein          | 86.84 | 401  | MbV_3681 | lipid-transfer protein              | 99.24 | 398  | BCG_2809c | lipid-transfer protein              | 86.84 | 401  | MAP2897c | lipid-transfer protein                   | 493  | 100   |
| MAP4_D911 | acyl-CoA dehydrogenase                                  | 441  | Rv2789c | Probable acyl-CoA dehydrogenase F                    | 80.77 | 410  | Mb2812c | acyl-CoA dehydrogenase          | 80.77 | 410  | MbV_3680 | acyl-CoA dehydrogenase              | 98.8  | 418  | BCG_2807c | acyl-CoA dehydrogenase              | 80.77 | 410  | MAP2896c | FadD21                                   | 218  | 100   |
| MAP4_D912 | bifunctional FAD synthetase riboflavin biosynthesis pro | 324  | Rv2786c | Probable bifunctional FAD synthetase                 | 91.36 | 331  | Mb2809c | bifunctional riboflavin kinase  | 91.36 | 331  | MbV_3678 | bifunctional riboflavin kinase/FMN  | 99.67 | 307  | BCG_2804c | bifunctional riboflavin kinase/FMN  | 91.36 | 331  | MAP2895c | bifunctional riboflavin kinase/FMN adena | 327  | 99.69 |
| MAP4_D913 | 30S ribosomal protein S15                               | 89   | Rv2785c | 30S ribosomal protein S15 RpoO                       | 91.01 | 89   | Mb2808c | 30S ribosomal protein S15       | 91.01 | 89   | MbV_3677 | 30S ribosomal protein S15           | 100   | 89   | BCG_2803c | 30S ribosomal protein S15           | 91.01 | 89   | MAP2892c | 30S ribosomal protein S15                | 89   | 100   |
| MAP4_D914 | bifunctional poly nucleotide nucleotidyl transferase    | 757  | Rv2783c | bifunctional poly nucleotide nucleotidyl transferase | 90.48 | 752  | Mb2806c | polynucleotide phosphorylase    | 90.48 | 752  | MbV_3676 | nucleotide phosphorylase/poly       | 99.73 | 748  | BCG_2801c | polynucleotide phosphorylase        | 90.48 | 752  | MAP2891c | polynucleotide phosphorylase/polyade     | 757  | 100   |
| MAP4_D917 | zinc protease PgpH                                      | 440  | Rv2782c | Probable zinc protease PgpH                          | 85.55 | 438  | Mb2805c | zinc protease PPR               | 85.55 | 438  | MbV_3675 | zinc protease                       | 99.09 | 427  | BCG_2800c | zinc protease pppH                  | 85.55 | 438  | MAP2890c | PgpH                                     | 440  | 100   |
| MAP4_D918 | alanine rich oxidoreductase                             | 341  | Rv2781c | Probable alanine rich oxidoreductase                 | 78.04 | 344  | Mb2804c | oxidoreductase                  | 78.04 | 344  | MbV_3673 | di-oxoenzyme                        | 99.09 | 337  | BCG_2799c | alanine rich oxidoreductase         | 78.04 | 344  | MAP2889c | hypothetical protein                     | 341  | 100   |
| MAP4_D919 | 40 kDa secreted L-alanine dehydrogenase Aid             | 473  | Rv2780  | Secreted L-alanine dehydrogenase AId                 | 63.24 | 371  | Mb2803c | L-alanine dehydrogenase         | 63.29 | 239  | MbV_3674 | alanine dehydrogenase               | 98.93 | 373  | BCG_2798  | L-alanine dehydrogenase             | 63.19 | 239  | MAP2888  | hypothetical protein                     | 373  | 100   |
| MAP4_D920 | hypothetical protein                                    | 153  | Rv2778c | hypothetical protein                                 | 71.81 | 156  | Mb2802c | hypothetical protein            | 71.81 | 156  | MbV_3672 | hypothetical protein                | 98.69 | 153  | BCG_2795c | hypothetical protein                | 71.81 | 156  | MAP2887c | hypothetical protein                     | 153  | 100   |
| MAP4_D921 | metal-dependent hydrolase family protein                | 302  | Rv2777c | hypothetical protein                                 | 74.75 | 305  | Mb2799c | hypothetical protein            | 74.75 | 305  | MbV_3671 | Fe atom-containing protein          | 98.68 | 302  | BCG_2794c | hypothetical protein                | 74.75 | 305  | MAP2886c | hypothetical protein                     | 302  | 100   |
| MAP4_D922 | short chain dehydrogenase                               | 594  | Rv2774c | Possible short-chain dehydrogenase                   | 36.83 | 599  | Mb2737c | short chain dehydrogenase       | 36.83 | 592  | MbV_3670 | short chain dehydrogenase           | 98.15 | 594  | BCG_2230c | short chain dehydrogenase           | 36.83 | 599  | MAP2885c | short chain dehydrogenase                | 594  | 100   |
| MAP4_D923 | oxidoreductase                                          | 366  | Rv2773c | Probable oxidoreductase                              | 80.58 | 309  | Mb2798c | oxidoreductase                  | 80.58 | 309  | MbV_3669 | oxidoreductase                      | 98.63 | 366  | BCG_2793c | oxidoreductase                      | 80.58 | 309  | MAP2884c | hypothetical protein                     | 366  | 100   |
| MAP4_D924 | hypothetical protein                                    | 2.16 | Rv2630c | Probable transcriptional regulator NrdR              | 29.58 | 210  | Mb0310  | TerR/ACRR family transcript     | 25.58 | 210  | MbV_3668 | hypothetical protein                | 100   | 191  | BCG_0342  | TerR family transcriptional reg     | 29.58 | 210  | MAP2883  | hypothetical protein                     | 216  | 100   |
| MAP4_D925 | putative oxidoreductase, rieske (2Fe-2S) domain-conta   | 311  | Rv2625c | Oxygenase component of 3-ketoster                    | 24.92 | 386  | Mb3556  | hypothetical protein            | 24.92 | 386  | MbV_3666 | Rieske (2Fe-2S) domain-containing   | 99.7  | 331  | BCG_0390  | oxidoreductase                      | 24.92 | 386  | MAP2882c | hypothetical protein                     | 311  | 100   |
| MAP4_D926 | hypothetical protein                                    | 360  | Rv2626c | hypothetical protein                                 | 28.65 | 358  | Mb0294c | hypothetical structural protein | 28.65 | 358  | MbV_3665 | hydrodipicolinate reductase N-ter   | 99.44 | 360  | BCG_0978c | hypothetical protein                | 28.65 | 358  | MAP2881c | hypothetical protein                     | 360  | 100   |
| MAP4_D927 | REP112 repeat region                                    | 451  | Rv1128c | hypothetical protein                                 | 49.77 | 451  | Mb1155c | hypothetical protein            | 49.77 | 451  | MbV_3659 | hypothetical protein                | 97.12 | 451  | BCG_1188c | hypothetical protein                | 49.77 | 451  | MAP2880c | hypothetical protein                     | 451  | 100   |
| MAP4_D928 | hypothetical protein                                    | 186  | Rv0519c | Possible conserved membrane protein                  | 23.08 | 300  | Mb0532c | hypothetical protein            | 23.08 | 300  | MbV_3663 | hypothetical protein                | 98.39 | 186  | BCG_0562c | hypothetical protein                | 23.08 | 300  | MAP2879c | hypothetical protein                     | 186  | 100   |
| MAP4_D929 | dihydrodipicolinate reductase                           | 254  | Rv0733c | dihydrodipicolinate reductase DapB                   | 90.57 | 245  | Mb2795c | dihydrodipicolinate reductase   | 89.75 | 245  | MbV_3662 | dihydrodipicolinate reductase       | 99.18 | 245  | BCG_2790c | dihydrodipicolinate reductase       | 90.16 | 245  | MAP2878c | dihydrodipicolinate reductase            | 245  | 100   |
| MAP4_D930 | hypothetical protein                                    | 1.15 | Rv2772c | Probable conserved transmembrane                     | 74.5  | 157  | Mb2794c | transmembrane protein           | 74.5  | 157  | MbV_3661 | TRP repeat-containing protein       | 99.34 | 151  | BCG_2789c | hypothetical protein                | 74.5  | 157  | MAP2877c | hypothetical protein                     | 1.15 | 100   |
| MAP4_D931 | hypothetical protein                                    | 155  | Rv2771c | hypothetical protein                                 | 83.78 | 150  | Mb2793c | hypothetical protein            | 83.78 | 150  | MbV_3660 | hypothetical protein                | 98.68 | 155  | BCG_2788c | hypothetical protein                | 83.78 | 150  | MAP2876c | hypothetical protein                     | 155  | 100   |
| MAP4_D932 | putative thioesterase-like superfamily protein          | 277  | Rv2689  | hypothetical protein                                 | 66.36 | 279  | Mb0610  | hypothetical protein            | 66.36 | 279  | MbV_3658 | hypothetical protein                | 98.19 | 277  | BCG_0636  | hypothetical protein                | 66.36 | 279  | MAP2875c | hypothetical protein                     | 277  | 99.64 |
| MAP4_D933 | fatty-acid-CoA ligase                                   | 35.2 | Rv0389  | Probable chain-fatty-acid-CoA ligase                 | 35.2  | 503  | Mb1155c | chain-fatty-acid-CoA ligase     | 35.2  | 503  | MbV_3659 | acyl-CoA dehydrogenase              | 99.02 | 510  | BCG_3114  | chain-fatty-acid-CoA ligase fat     | 35.2  | 503  | MAP2874c | FadD13                                   | 294  | 100   |
| MAP4_D934 | putative carbamoyl-phosphate synthase carbamoyl trans   | 1075 | Rv2501c | Probable acetyl-/propionyl-coenzyme                  | 43.15 | 654  | Mb2528c | acetyl-/propionyl-coenzyme 4    | 43.15 | 654  | MbV_3657 | carbamoyl-phosphate synthase/Car    | 98.88 | 1075 | BCG_2521c | acetyl-/propionyl-coenzyme A        | 43.15 | 654  | MAP2873c | hypothetical protein                     | 1075 | 100   |
| MAP4_D935 | hypothetical protein                                    | 108  | Rv2878  | ESX-1 secretion-associated protein                   | 32.08 | 280  | Mb3908  | hypothetical protein            | 32.08 | 280  | MbV_3656 | hypothetical protein                | 100   | 108  | BCG_3588  | hypothetical protein                | 34.21 | 343  | MAP2872c | hypothetical protein                     | 108  | 100   |
| MAP4_D936 | short chain type dehydrogenase                          | 425  | Rv2770c | Probable short-chain type dehydrog                   | 67.65 | 260  | Mb2792c | 4-hydroxyacyl-CoA reductase     | 67.65 | 260  | MbV_3655 | hydroxyacyl-CoA-carrier-protein/re  | 99.61 | 259  | BCG_2787c | hydroxyacyl-CoA reductase           | 67.65 | 260  | MAP2871c | hypothetical protein                     | 425  | 100   |
| MAP4_D937 | putative glyoxylate reductase family protein            | 259  | Rv1524  | Probable glyoxylate reductase                        | 27.01 | 414  | Mb1551  | hypothetical protein            | 27.01 | 414  | MbV_3654 | glyoxylate reductase GfE            | 98.57 | 409  | BCG_2786  | glyoxylate reductase                | 27.01 | 414  | MAP2870c | hypothetical protein                     | 259  | 100   |
| MAP4_D938 | alanine rich hydrolase                                  | 246  | Rv2765  | Probable alanine rich hydrolase                      | 73.36 | 245  | Mb2787  | hypothetical protein            | 73.36 | 245  | MbV_3654 | hydrolase                           | 99.29 | 246  | BCG_2782  | alanine rich hydrolase              | 72.95 | 245  | MAP2869c | hypothetical protein                     | 246  | 100   |
| MAP4_D939 | thymidylate synthase                                    | 186  | Rv2764c | Probable thymidylate synthase                        | 91.6  | 263  | Mb2786c | thymidylate synthase            | 91.6  | 263  | MbV_3652 | thymidylate synthase                | 99.62 | 266  | BCG_2781c | thymidylate synthase                | 91.6  | 263  | MAP2868c | thymidylate synthase                     | 186  | 100   |
| MAP4_D940 | dihydrofolate reductase                                 | 211  | Rv2763c | dihydrofolate reductase dhfrA (DHFR)                 | 70.19 | 159  | Mb2785c | thymidylate reductase           | 70.19 | 159  | MbV_3651 | dihydrofolate reductase             | 98.3  | 176  | BCG_2780c | dihydrofolate reductase dhfrA       | 70.19 | 159  | MAP2867c | dhfrA                                    | 211  | 100   |
| MAP4_D941 | hypothetical protein                                    | 244  | Rv2482  | Probable coiled-coil structural protein              | 40.08 | 305  | Mb2796c | coiled-coil structural protein  | 40.08 | 305  | MbV_3650 | hypothetical protein                | 99.44 | 244  | BCG_1720  | coiled-coil structural protein      | 40.08 | 305  | MAP2866c | hypothetical protein                     | 244  | 99.9  |
| MAP4_D942 | hypothetical protein                                    | 412  | Rv2762c | hypothetical protein                                 | 69.52 | 412  | Mb2783c | hypothetical protein            | 69.52 | 412  | MbV_3649 | RNA I repressin-modification enzy   | 100   | 335  | BCG_2785c | hypothetical protein                | 69.52 | 412  | MAP2865c | hypothetical protein                     | 412  | 100   |
| MAP4_D943 | thymidylate synthase Thyx                               | 91.2 | Rv2754c | Probable thymidylate synthase Thyx                   | 91.2  | 250  | Mb2795c | FAD-dependent thymidylate       | 91.2  | 250  | MbV_3645 | FAD-dependent thymidylate synth     | 100   | 250  | BCG_2770c | FAD-dependent thymidylate sy        | 91.2  | 250  | MAP2864c | FAD-dependent thymidylate synthase       | 250  | 100   |
| MAP4_D944 | dihydrodipicolinate synthase                            | 300  | Rv2753c | Probable dihydrodipicolinate synth                   | 88.67 | 300  | Mb2774c | dihydrodipicolinate synthase    | 88.67 | 300  | MbV_3644 | dihydrodipicolinate synthase        | 99.67 | 300  | BCG_2769c | dihydrodipicolinate synthase        | 88.67 | 300  | MAP2864c | dihydrodipicolinate synthase             | 300  | 74.71 |
| MAP4_D945 | putative hydrolase of metallo-beta-lactamase super      | 58   | Rv2752c | hypothetical protein                                 | 89.07 | 58   | Mb2773c | hypothetical protein            | 89.07 | 58   | MbV_3643 | hydrolase of the metallo-beta-lacta | 99.82 | 58   | BCG_2768c | hydrolase of the metallo-beta-lacta | 89.07 | 58   | MAP2863c | hypothetical protein                     | 58   | 100   |
| MAP4_D946 | putative methyltransferase family protein               | 290  | Rv2751  | hypothetical protein                                 | 83.45 | 296  | Mb2772c | hypothetical protein            | 83.45 | 296  | MbV_3642 | methyltransferase, putative, family | 99.64 | 277  | BCG_2767c | hypothetical protein                | 83.45 | 296  | MAP2862c | hypothetical protein                     | 290  | 100   |
| MAP4_D947 | hypothetical protein                                    | 276  | Rv2750  | Probable deoxyacyl-CoA reductase                     | 76.95 | 272  | Mb2771  | 4-hydroxyacyl-CoA reductase     | 76.95 | 272  | MbV_3641 | 4-hydroxyacyl-CoA reductase         | 99.28 | 276  | BCG_2766  | 4-hydroxyacyl-CoA reductase         | 76.95 | 272  | MAP2861c | 4-hydroxyacyl-CoA reductase              | 276  | 100   |
| MAP4_D948 | antibiotic biosynthesis monooxygenase domain-conta      | 104  | Rv2749  | hypothetical protein                                 | 82.52 | 104  | Mb2770  | hypothetical protein            | 82.52 | 104  | MbV_3640 | antibiotic biosynthesis monooxyge   | 99.04 | 104  | BCG_2765  | hypothetical protein                | 82.52 | 104  | MAP2860  | hypothetical protein                     | 104  | 100   |
| MAP4_D949 | cell division transmembrane protein FtsK                | 895  | Rv2748c | Possible cell division transmembran                  | 77.8  | 883  | Mb2769c | DNA translocase FtsK            | 77.8  | 883  | MbV_3639 | FtsK/SpoIIIE family protein         | 99.74 | 775  | BCG_2764c | cell division transmembrane pr      | 77.8  | 883  | MAP2859c | hypothetical protein                     | 895  | 100   |
| MAP4_D950 | transferase                                             | 174  | Rv2747  | Probable L-glutamate alpha-N-acety                   | 89.66 | 174  | Mb2768  | N-acetylglutamate synthase      | 89.66 | 174  | MbV_3638 | N-acetylglutamate synthase          | 100   | 174  | BCG_2763  | N-acetylglutamate synthase          | 89.66 | 174  | MAP2858  | N-acetylglutamate synthase               | 174  | 10    |

Table S1 continued

|           |                                                             |     |         |                                                       |       |     |          |                                                  |       |     |          |                                                      |       |      |           |                                                  |       |     |          |                                       |     |       |
|-----------|-------------------------------------------------------------|-----|---------|-------------------------------------------------------|-------|-----|----------|--------------------------------------------------|-------|-----|----------|------------------------------------------------------|-------|------|-----------|--------------------------------------------------|-------|-----|----------|---------------------------------------|-----|-------|
| MAP4_1004 | irk system potassium uptake protein                         | 211 | Rv2691  | TRK system potassium uptake                           | 89.14 | 227 | MBv2110  | TRK system potassium uptake                      | 89.59 | 227 | MVW_3582 | TrkA protein                                         | 99.54 | 218  | BCG_2704  | TRK system potassium uptake                      | 89.59 | 227 | MAP2808  | hypothetical protein                  | 221 | 100   |
| MAP4_1005 | conserved alanine, valine and leucine rich membrane protein | 664 | Rv2690  | Probable conserved integral membrane protein          | 82.19 | 627 | MBv2706  | hypothetical protein                             | 82.23 | 627 | MVW_3581 | trkA amino acid permease                             | 99.54 | 664  | BCG_2703c | integral membrane alanine and                    | 82.23 | 627 | MAP2807c | hypothetical protein                  | 664 | 100   |
| MAP4_1006 | conserved alanine, valine and glycine rich protein          | 361 | Rv2689  | Conserved alanine and valine and glycine-rich protein | 74.46 | 405 | MBv2705  | hypothetical protein                             | 74.46 | 405 | MVW_3580 | trkA translocator                                    | 99.54 | 395  | BCG_2702c | trkA translocator                                | 74.46 | 405 | MAP2806c | hypothetical protein                  | 361 | 100   |
| MAP4_1007 | aromatic-transport integral membrane protein                | 429 | Rv2688  | Probable aromatic-transport integral membrane protein | 73.07 | 429 | MBv2703  | hypothetical protein                             | 73.07 | 429 | MVW_3579 | aromatic-transport integral membrane protein         | 99.54 | 429  | BCG_2699c | aromatic-transport integral membrane protein     | 73.07 | 429 | MAP2805c | hypothetical protein                  | 429 | 100   |
| MAP4_1008 | hypothetical protein                                        | 160 | Rv2687  | hypothetical protein                                  | 80.14 | 165 | MBv2702  | hypothetical protein                             | 80.82 | 165 | MVW_3578 | CBS domain-containing protein                        | 99.32 | 147  | BCG_2696  | hypothetical protein                             | 80.82 | 165 | MAP2804  | hypothetical protein                  | 160 | 100   |
| MAP4_1009 | 1-deoxy-D-xylulose 5-phosphate synthase                     | 641 | Rv2682c | 1-deoxy-D-xylulose 5-phospho synthase                 | 87.54 | 638 | MBv2701c | 1-deoxy-D-xylulose 5-phospho synthase            | 87.54 | 638 | MVW_3577 | 1-deoxy-D-xylulose 5-phospho synthase                | 99.84 | 641  | BCG_2695c | 1-deoxy-D-xylulose 5-phospho synthase            | 87.54 | 638 | MAP2803c | 1-deoxy-D-xylulose 5-phospho synthase | 641 | 100   |
| MAP4_1010 | conserved hypothetical alanine rich protein                 | 428 | Rv2681  | Conserved hypothetical alanine rich protein           | 75.48 | 438 | MBv2700  | hypothetical protein                             | 74.88 | 438 | MVW_3576 | rfbunclease D                                        | 99.53 | 428  | BCG_2694  | hypothetical protein                             | 74.88 | 438 | MAP2802  | hypothetical protein                  | 428 | 100   |
| MAP4_1011 | hypothetical protein                                        | 211 | Rv2680  | hypothetical protein                                  | 82.59 | 210 | MBv2699  | hypothetical protein                             | 82.59 | 210 | MVW_3575 | hypothetical protein                                 | 99.53 | 211  | BCG_2693  | hypothetical protein                             | 82.59 | 210 | MAP2801  | hypothetical protein                  | 211 | 100   |
| MAP4_1012 | enoyl-CoA hydratase                                         | 273 | Rv2679  | Probable enoyl-CoA hydratase EchaB                    | 84.15 | 276 | MBv2698  | enoyl-CoA hydratase                              | 84.15 | 276 | MVW_3574 | enoyl-CoA hydratase                                  | 99.63 | 273  | BCG_2692  | enoyl-CoA hydratase                              | 84.15 | 276 | MAP2800  | enoyl-CoA hydratase                   | 273 | 100   |
| MAP4_1013 | uroporphyrinogen decarboxylase                              | 357 | Rv2678  | Probable uroporphyrinogen decarboxylase               | 78.03 | 357 | MBv2697c | uroporphyrinogen decarboxylase                   | 78.03 | 357 | MVW_3573 | uroporphyrinogen decarboxylase                       | 99.16 | 357  | BCG_2691c | uroporphyrinogen decarboxylase                   | 78.03 | 357 | MAP2799c | uroporphyrinogen decarboxylase        | 357 | 100   |
| MAP4_1014 | protoporphyrinogen oxidase                                  | 451 | Rv2677c | Probable protoporphyrinogen oxidase                   | 73.13 | 452 | MBv2696c | protoporphyrinogen oxidase                       | 73.13 | 452 | MVW_3890 | dehydrogenase                                        | 33.79 | 509  | BCG_2690c | protoporphyrinogen oxidase                       | 73.13 | 452 | MAP2798c | protoporphyrinogen oxidase            | 451 | 100   |
| MAP4_1015 | chlorite dismutase family protein                           | 231 | Rv2676  | hypothetical protein                                  | 90.91 | 231 | MBv2695c | hypothetical protein                             | 90.91 | 231 | MVW_3571 | hypothetical protein                                 | 100   | 231  | BCG_2689b | hypothetical protein                             | 90.91 | 231 | MAP2797b | hypothetical protein                  | 231 | 100   |
| MAP4_1016 | putative methyltransferase                                  | 250 | Rv2675c | hypothetical protein                                  | 80    | 250 | MBv2694c | hypothetical protein                             | 80    | 250 | MVW_3569 | lysine-3-methyltransferase (Bla)                     | 99.2  | 250  | BCG_2688b | hypothetical protein                             | 80    | 250 | MAP2796c | hypothetical protein                  | 250 | 100   |
| MAP4_1017 | hypothetical protein                                        | 282 | Rv2144  | hypothetical protein                                  | 60.71 | 296 | MBv2144  | hypothetical protein                             | 60.71 | 296 | MVW_3567 | hypothetical protein                                 | 98.8  | 273  | BCG_3724c | hypothetical protein                             | 60.71 | 296 | MAP2795  | hypothetical protein                  | 282 | 100   |
| MAP4_1018 | putative methionine sulfoxide reductase                     | 134 | Rv2674  | Probable peptide methionine sulfoxide reductase       | 84.96 | 136 | MBv2693  | hypothetical protein                             | 84.96 | 136 | MVW_3566 | methionine-S-alkoxide reductase                      | 98.51 | 134  | BCG_2687  | hypothetical protein                             | 84.96 | 136 | MAP2794  | hypothetical protein                  | 134 | 100   |
| MAP4_1019 | hypothetical protein                                        | 428 | Rv2673  | Possible arabinofuranosyltransferase                  | 82.56 | 433 | MBv2692  | hypothetical protein                             | 82.56 | 433 | MVW_3565 | hypothetical protein                                 | 100   | 428  | BCG_2686  | hypothetical protein                             | 82.56 | 433 | MAP2793  | hypothetical protein                  | 428 | 100   |
| MAP4_1020 | secreted protease                                           | 526 | Rv2672  | Possible secreted protease                            | 77.65 | 528 | MBv2691  | protease                                         | 77.64 | 528 | MVW_3564 | alpha/beta hydrolase                                 | 99.81 | 528  | BCG_2685  | protease                                         | 77.64 | 528 | MAP2792  | hypothetical protein                  | 526 | 100   |
| MAP4_1021 | functional riboflavin biosynthesis protein                  | 254 | Rv2671  | Possible functional riboflavin biosynthesis protein   | 74.3  | 258 | MBv2690  | hypothetical protein                             | 74.3  | 258 | MVW_3563 | hypothetical protein                                 | 99.21 | 254  | BCG_2684  | hypothetical protein                             | 74.3  | 258 | MAP2791  | hypothetical protein                  | 254 | 100   |
| MAP4_1022 | putative ATPGTP-binding integral membrane protein           | 232 | Rv2670c | hypothetical protein                                  | 85.6  | 369 | MBv2689c | hypothetical protein                             | 85.6  | 369 | MVW_3562 | ATP/GTP-binding integral membrane protein            | 98.44 | 361  | BCG_2683c | hypothetical protein                             | 85.6  | 369 | MAP2790c | hypothetical protein                  | 232 | 100   |
| MAP4_1023 | acetyltransferase (GNAT) family protein                     | 173 | Rv2669  | GCNS-related N-acetyltransferase                      | 64.29 | 156 | MBv2688  | hypothetical protein                             | 64.29 | 156 | MVW_3561 | acetyltransferase, gnaf family protein               | 94.8  | 176  | BCG_2682  | hypothetical protein                             | 64.29 | 156 | MAP2789  | hypothetical protein                  | 173 | 100   |
| MAP4_1024 | exported alanine and valine rich protein                    | 175 | Rv2668  | Possible exported alanine and valine rich protein     | 71.59 | 173 | MBv2687  | hypothetical protein                             | 72.16 | 173 | MVW_3560 | hypothetical protein                                 | 99.23 | 130  | BCG_2681  | hypothetical protein                             | 72.16 | 173 | MAP2788  | hypothetical protein                  | 175 | 100   |
| MAP4_1025 | ATP-dependent protease ATP-binding subunit CtpC2            | 250 | Rv2667  | Possible ATP-dependent protease A                     | 75.73 | 252 | MBv2686  | ATP-dependent protease ATP-binding subunit CtpC2 | 75.73 | 252 | MVW_3559 | ATP-dependent Ctp protease ATP-binding subunit CtpC2 | 98    | 250  | BCG_2680  | ATP-dependent protease ATP-binding subunit CtpC2 | 75.73 | 252 | MAP2787  | CtpC2                                 | 250 | 100   |
| MAP4_1026 | hypothetical protein                                        | 114 | Rv1804c | hypothetical protein                                  | 42.42 | 108 | MBv1833c | hypothetical protein                             | 42.42 | 108 | MVW_3558 | hypothetical protein                                 | 99.12 | 114  | BCG_1837c | hypothetical protein                             | 42.42 | 108 | MAP2786c | hypothetical protein                  | 114 | 100   |
| MAP4_1027 | hypothetical protein                                        | 114 | Rv1804c | hypothetical protein                                  | 43.56 | 108 | MBv1833c | hypothetical protein                             | 43.56 | 108 | MVW_3557 | hypothetical protein                                 | 100   | 114  | BCG_1837c | hypothetical protein                             | 43.56 | 108 | MAP2785c | hypothetical protein                  | 114 | 100   |
| MAP4_1028 | hypothetical protein                                        | 416 | Rv2025c | hypothetical protein                                  | 39.55 | 332 | MBv2050c | hypothetical protein                             | 39.55 | 332 | MVW_3555 | cation efflux family protein                         | 100   | 306  | BCG_2044c | hypothetical protein                             | 39.55 | 332 | MAP2784  | hypothetical protein                  | 416 | 100   |
| MAP4_1029 | hypothetical protein                                        | 70  | Rv483c  | Possible exported protein                             | 56.25 | 220 | MBv3513c | hypothetical protein                             | 56.25 | 220 | MVW_3554 | hypothetical protein                                 | 100   | 70   | BCG_3547c | long-chain-fatty-acid-ACP ligase                 | 56.25 | 220 | MAP2026c | hypothetical protein                  | 70  | 100   |
| MAP4_1030 | aldehyde dehydrogenase family protein (betB)                | 487 | Rv2683c | Probable aldehyde dehydrogenase alphaC                | 41.83 | 455 | MBv2683c | aldehyde dehydrogenase                           | 41.83 | 455 | MVW_3553 | aldehyde dehydrogenase                               | 99.79 | 487  | BCG_2880b | aldehyde dehydrogenase alphaC                    | 41.83 | 455 | MAP2782  | hypothetical protein                  | 487 | 100   |
| MAP4_1031 | carboxymuconolactone decarboxylase family protein           | 267 | Rv2671c | Possible carboxymuconolactone decarboxylase           | 36.61 | 264 | MBv2671c | 3-ketoadipyl-CoA reductase                       | 36.61 | 264 | MVW_3552 | hypothetical protein                                 | 99.27 | 271  | BCG_2786c | carboxymuconolactone decarboxylase               | 36.61 | 264 | MAP2781  | hypothetical protein                  | 267 | 100   |
| MAP4_1032 | dehydrogenase                                               | 273 | Rv2750  | Probable dehydrogenase                                | 48.68 | 272 | MBv2771  | 3-ketoadipyl-CoA reductase                       | 48.68 | 272 | MVW_3551 | 3-ketoadipyl-CoA reductase                           | 99.27 | 273  | BCG_2786c | 3-ketoadipyl-CoA reductase                       | 48.68 | 272 | MAP2780  | hypothetical protein                  | 273 | 100   |
| MAP4_1033 | short-chain dehydrogenase-reductase                         | 276 | Rv2750  | Probable dehydrogenase                                | 52.75 | 272 | MBv2771  | 3-ketoadipyl-CoA reductase                       | 52.75 | 272 | MVW_3550 | short chain dehydrogenase                            | 98.55 | 276  | BCG_2766  | 3-ketoadipyl-CoA reductase                       | 52.75 | 272 | MAP2779  | short chain dehydrogenase             | 276 | 100   |
| MAP4_1034 | Transcriptional regulator, TetR family                      | 225 | Rv374   | Transcriptional regulatory protein K                  | 27.61 | 199 | MBv3605  | transcriptional regulatory protein K             | 27.61 | 199 | MVW_3548 | transcriptional regulatory protein K                 | 98.23 | 224  | BCG_3639  | transcriptional regulatory protein K             | 27.61 | 199 | MAP2778c | hypothetical protein                  | 225 | 100   |
| MAP4_1035 | hypothetical protein                                        | 40  | Rv3085  | Probable monooxygenase                                | 40    | 390 | MBv3092  | hypothetical protein                             | 40    | 390 | MVW_3543 | lactase/peroxidase HPI                               | 27.43 | 748  | BCG_0423  | monooxygenase                                    | 40    | 390 | MAP2777c | hypothetical protein                  | 40  | 100   |
| MAP4_1036 | hypothetical protein                                        | 75  | Rv3156  | Probable aldehyde dehydrogenase 1-eth                 | 75    | 63  | MBv3156  | aldehyde dehydrogenase subunit                   | 75    | 63  | MVW_3542 | hypothetical protein                                 | 99.2  | 75   | BCG_3159  | aldehyde dehydrogenase subunit                   | 75    | 63  | MAP2776  | MozA                                  | 75  | 280   |
| MAP4_1037 | putative aminoacylase                                       | 424 | Rv3295c | Probable arylsulfatase AseA (FcpY) subunit            | 24.14 | 970 | MBv3275c | arylsulfatase                                    | 24.14 | 970 | MVW_3544 | arylsulfatase                                        | 98.76 | 424  | BCG_3179  | arylsulfatase subunit                            | 24.14 | 970 | MAP2775c | hypothetical protein                  | 424 | 98.76 |
| MAP4_1038 | Transcriptional regulator, ICR family                       | 295 | Rv2827c | Probable transcriptional regulator, ICR family        | 34.55 | 295 | MBv2959  | hypothetical protein                             | 34.55 | 297 | MVW_3545 | hypothetical protein                                 | 98.64 | 317  | BCG_2589  | hypothetical protein                             | 34.55 | 295 | MAP2774  | hypothetical protein                  | 295 | 100   |
| MAP4_1039 | short-chain type dehydrogenase reductase                    | 317 | Rv0851c | Probable short-chain type dehydrogenase reductase     | 34.74 | 275 | MBv0874c | short chain dehydrogenase                        | 34.74 | 275 | MVW_3542 | hypothetical protein                                 | 98.4  | 312  | BCG_0903c | short chain dehydrogenase reductase              | 34.74 | 275 | MAP2773c | hypothetical protein                  | 317 | 100   |
| MAP4_1040 | acetoacetate decarboxylase family protein                   | 262 | Rv0327c | Possible cytochrome P450 135A1 cy                     | 47.62 | 449 | MBv3549  | cytochrome P450 135A1                            | 47.62 | 449 | MVW_3543 | acetoacetate decarboxylase                           | 98.88 | 267  | BCG_0366c | cytochrome P450 135A1 cyp135                     | 47.62 | 449 | MAP2772  | hypothetical protein                  | 262 | 100   |
| MAP4_1041 | putative aminoacylase                                       | 404 | Rv3138c | Probable ATP-dependent DNA helicase                   | 35.42 | 400 | MBv3122c | DNA helicase II                                  | 35.42 | 400 | MVW_3541 | aminoacylase                                         | 99.5  | 404  | BCG_3272c | DNA helicase II                                  | 35.42 | 400 | MAP2771  | hypothetical protein                  | 404 | 100   |
| MAP4_1042 | putative aminoacylase                                       | 404 | Rv3138c | Probable aminoacylase                                 | 37.5  | 404 | MBv3140c | hypothetical protein                             | 37.5  | 404 | MVW_3540 | aminoacylase                                         | 100   | 425  | BCG_2764c | aminoacylase                                     | 37.5  | 404 | MAP2770c | hypothetical protein                  | 404 | 100   |
| MAP4_1043 | hypothetical protein                                        | 185 | Rv0015c | Transmembrane serine/threonine-p                      | 40.62 | 431 | MBv0015c | Ser/Thr protein kinase                           | 40.62 | 431 | MVW_3539 | hypothetical protein                                 | 98.27 | 173  | BCG_0045c | Ser/Thr protein kinase                           | 40.62 | 431 | MAP2770  | hypothetical protein                  | 185 | 100   |
| MAP4_1044 | hypothetical protein                                        | 100 | Rv2363  | Probable DNA methylase (modificat                     | 38.89 | 553 | MBv2363  | DNA methylase                                    | 38.89 | 553 | MVW_3538 | hypothetical protein                                 | 99    | 102  | BCG_3292  | DNA methylase                                    | 38.89 | 553 | MAP3610  | hypothetical protein                  | 213 | 68.75 |
| MAP4_1045 | hypothetical protein                                        | 99  | Rv0214  | Probable fatty-acid-CoA ligase FadD                   | 40    | 537 | MBv0220  | long-chain-fatty-acid-CoA lig                    | 40    | 537 | MVW_3537 | hypothetical protein                                 | 100   | 99   | BCG_0251  | long-chain-fatty-acid-CoA ligase                 | 40    | 537 | MAP3044  | hypothetical protein                  | 99  | 100   |
| MAP4_1046 | phosphoglycerate phosphatase                                | 326 | Rv2576c | Probable PhnZ phosphoglycerate phosphatase            | 57.53 | 375 | MBv2576c | type I restriction/modification                  | 57.53 | 375 | MVW_3536 | phosphoglycerate phosphatase                         | 37.63 | 368  | BCG_2771c | type I restriction/modification                  | 57.53 | 375 | MAP2768  | hypothetical protein                  | 326 | 99.69 |
| MAP4_1047 | hypothetical protein                                        | 183 | Rv1515c | Probable sugar transferase                            | 45.83 | 207 | MBv1509c | hypothetical protein                             | 45.83 | 207 | MVW_4987 | hypothetical protein                                 | 27.59 | 411  | BCG_2881c | hypothetical protein                             | 45.83 | 207 | MAP2767c | hypothetical protein                  | 183 | 100   |
| MAP4_1048 | putative phlV1 phage protein                                | 50  | Rv1583c | phlV1 phage protein                                   | 50    | 132 | MBv2407  | phlV1 phage protein                              | 50    | 132 | MVW_4987 | hypothetical protein                                 | 31.58 | 1191 | BCG_3788c | phlV1 phage protein                              | 50    | 132 | MAP2766  | hypothetical protein                  | 50  | 100   |
| MAP4_1049 | hypothetical protein                                        | 396 | Rv0409  | Probable phosphate acetyltransferase                  | 29.27 | 600 | MBv0416  | phosphate acetyltransferase                      | 29.27 | 600 | MVW_3847 | phosphate acetyltransferase                          | 28.77 | 528  | BCG_0447  | phosphate acetyltransferase                      | 29.27 | 600 | MAP2765  | hypothetical protein                  | 396 | 100   |
| MAP4_1050 | hypothetical protein                                        | 149 | Rv2156c | Probable phospho-N-acetylmuramoyl-pentase             | 28.57 | 359 | MBv2180c | phospho-N-acetylmuramoyl-pentase                 | 28.57 | 359 | MVW_3333 | phospho-N-acetylmuramoyl-pentase                     | 28.3  | 539  | BCG_2173c | phospho-N-acetylmuramoyl-pentase                 | 28.57 | 359 | MAP2764  | hypothetical protein                  | 149 | 100   |
| MAP4_105  |                                                             |     |         |                                                       |       |     |          |                                                  |       |     |          |                                                      |       |      |           |                                                  |       |     |          |                                       |     |       |



Table S1 continued

|           |                                                          |        |         |                                                     |       |      |          |                                                     |       |      |          |                                                     |       |      |           |                                                     |       |      |          |                                        |       |       |
|-----------|----------------------------------------------------------|--------|---------|-----------------------------------------------------|-------|------|----------|-----------------------------------------------------|-------|------|----------|-----------------------------------------------------|-------|------|-----------|-----------------------------------------------------|-------|------|----------|----------------------------------------|-------|-------|
| MAP4_1204 | Transcriptional regulator, TetR family                   | 230    | Rv1167c | Probable transcriptional regulator, TetR family     | 68.89 | 201  | Mv01199c | Transcriptional regulator                           | 68.89 | 201  | Mv01199c | TetR family transcriptional regulator               | 99.13 | 230  | BCG_1229c | transcriptional regulator                           | 68.89 | 201  | MAP2614  | hypothetical protein                   | 230   | 100   |
| MAP4_1205 | N-acetyl-L-D-myo-inositol-2-amino-2-deoxy-alpha-p-g      | 300    | Rv1170  | N-acetyl-L-D-myo-inositol-2-amino-2-deoxy-alpha-p-g | 73.42 | 303  | Mb01203  | N-Acetyl-L-D-myo-Inositol-2-amino-2-deoxy-alpha-p-g | 73.42 | 303  | Mv01130  | N-Acetyl-L-D-myo-Inositol-2-amino-2-deoxy-alpha-p-g | 98.33 | 300  | BCG_1233c | N-Acetyl-L-D-myo-Inositol-2-amino-2-deoxy-alpha-p-g | 73.42 | 303  | MAP2616c | hypothetical protein                   | 300   | 100   |
| MAP4_1206 | hypothetical protein                                     | 67.11  | Rv1171  | hypothetical protein                                | 67.11 | 146  | Mb01204  | hypothetical protein                                | 67.11 | 146  | Mv01131  | hypothetical protein                                | 99.13 | 230  | BCG_1234c | hypothetical protein                                | 67.11 | 146  | MAP2617c | hypothetical protein                   | 67.11 | 99.87 |
| MAP4_1207 | F420 biosynthesis protein F42C                           | 153    | Rv1173  | Probable F420 biosynthesis protein F42C             | 89.44 | 856  | Mb01206  | FD synthase                                         | 89.44 | 856  | Mv01132  | FD synthase                                         | 98.42 | 857  | BCG_1236c | FD synthase                                         | 89.44 | 856  | MAP2611c | hypothetical protein                   | 857   | 99.86 |
| MAP4_1208 | hypothetical protein                                     | 45.65  | Rv3408  | Possible toxin VacA7 Contains PIN                   | 45.65 | 136  | Mb3442   | hypothetical protein                                | 45.65 | 136  | Mv01133  | hypothetical protein                                | 98.23 | 257  | BCG_1237c | hypothetical protein                                | 45.65 | 136  | MAP2700  | hypothetical protein                   | 206   | 63.16 |
| MAP4_1209 | putative low molecular weight T-cell antigen             | 119    | Rv1174c | Low molecular weight T-cell antigen                 | 61.82 | 110  | Mb01207c | hypothetical protein                                | 61.82 | 110  | Mv01134  | hypothetical protein                                | 100   | 110  | BCG_1237c | hypothetical protein                                | 61.82 | 110  | MAP2609  | hypothetical protein                   | 110   | 100   |
| MAP4_1210 | transposase                                              | 32.65  | Rv2812  | Probable transposase                                | 32.65 | 469  | Mb2936   | transposase                                         | 32.65 | 469  | Mv01130  | transposase                                         | 83.29 | 345  | BCG_1238c | transposase                                         | 32.65 | 469  | MAP2608  | hypothetical protein                   | 329   | 100   |
| MAP4_1211 | 14S ferredoxin, iron-sulfur binding protein              | 83.4   | Rv1177  | Probable ferredoxin f42C                            | 83.4  | 108  | Mb01210  | ferredoxin f42C                                     | 83.4  | 108  | Mv01136  | ferredoxin f42C                                     | 99.13 | 108  | BCG_1240c | ferredoxin f42C                                     | 83.4  | 108  | MAP2607  | hypothetical protein                   | 108   | 100   |
| MAP4_1212 | N-succinyl-diaminopimelate aminotransferase alter        | 77     | Rv1178  | Probable aminotransferase                           | 83.89 | 362  | Mb01211  | N-succinyl-diaminopimelate aminotransferase         | 83.89 | 362  | Mv01137  | N-succinyl-diaminopimelate aminotransferase         | 99.13 | 372  | BCG_1241c | N-succinyl-diaminopimelate aminotransferase         | 83.89 | 362  | MAP2606c | hypothetical protein                   | 372   | 100   |
| MAP4_1213 | hypothetical protein                                     | 396    | Rv2690c | Probable conserved integral memb                    | 34.04 | 657  | Mb01219  | hypothetical protein                                | 34.04 | 657  | Mv01138  | OB-fold nucleic acid binding domai                  | 99.22 | 794  | BCG_1243c | hypothetical protein                                | 34.04 | 663  | MAP2605c | hypothetical protein                   | 796   | 100   |
| MAP4_1214 | Polypeptide synthase                                     | 76     | Rv1527c | Probable polypeptide synthase Pkx5                  | 71.82 | 2108 | Mb01213  | polypeptide beta-ketocacyl synth                    | 71.82 | 2085 | Mv01139  | mycrocerosic acid synthase                          | 98.22 | 2089 | BCG_1243c | polypeptide beta-ketocacyl synth                    | 81.07 | 2085 | MAP2604c | hypothetical protein                   | 176   | 100   |
| MAP4_1215 | polypeptide beta-ketocacyl synthase PK5A                 | 1336   | Rv1181  | Probable polypeptide beta-ketocacyl s               | 73.91 | 1582 | Mb01213  | polypeptide beta-ketocacyl synth                    | 73.84 | 2085 | Mv01131  | mycrocerosic acid synthase                          | 98.22 | 2089 | BCG_1243c | polypeptide beta-ketocacyl synth                    | 73.91 | 2085 | MAP2603c | hypothetical protein                   | 736   | 100   |
| MAP4_1216 | hypothetical protein                                     | 81     | Rv0974c | Probable acetyl-propionyl-Coa carb                  | 31.03 | 529  | Mb0999c  | acetyl-propionyl-Coa carbonyl                       | 31.03 | 529  | Mv01130  | hypothetical protein                                | 98.77 | 81   | BCG_1028c | acetyl-propionyl-coa carbonyl                       | 31.03 | 529  | MAP2602  | hypothetical protein                   | 419   | 100   |
| MAP4_1217 | hypothetical protein                                     | 54.1   | Rv0634a | hypothetical protein                                | 54.1  | 83   | Mb0652   | hypothetical protein                                | 54.1  | 83   | Mv01132  | hypothetical protein                                | 98.53 | 87   | BCG_0682  | hypothetical protein                                | 54.1  | 83   | MAP4105  | hypothetical protein                   | 87    | 60    |
| MAP4_1218 | PPE family protein                                       | 357    | Rv1790  | PPE family protein PPE27                            | 49.38 | 350  | Mb01818  | PPE family protein                                  | 49.69 | 350  | Mv01132  | PPE family protein                                  | 98.6  | 363  | BCG_1822  | PPE family protein                                  | 49.38 | 350  | MAP2600  | hypothetical protein                   | 357   | 100   |
| MAP4_1219 | PPE family protein                                       | 395    | Rv1808  | PPE family protein PPE32                            | 46.2  | 409  | Mb01837  | PPE family protein                                  | 46.2  | 409  | Mv01132a | PPE family protein                                  | 99.24 | 395  | BCG_1841  | PPE family protein                                  | 46.2  | 409  | MAP2600  | hypothetical protein                   | 395   | 100   |
| MAP4_1220 | bifunctional sulfate adenylyltransferase/adenylylsulfate | 46.67  | Rv1286  | Probable bifunctional enzyme CymN                   | 46.67 | 614  | Mb01317  | bifunctional sulfate adenylyl                       | 46.67 | 614  | Mv011325 | adenylylsulfate kinase                              | 100   | 230  | BCG_1345  | bifunctional sulfate adenylyl                       | 46.67 | 614  | MAP2599c | hypothetical protein                   | 230   | 100   |
| MAP4_1221 | sulfate adenylyltransferase                              | 44.9   | Rv2677  | ESK conserved component EcdJ1 ES                    | 37.14 | 511  | Mb3907   | transmembrane protein                               | 37.14 | 511  | Mv01130  | hypothetical protein                                | 99.52 | 419  | BCG_3155a | two component sensor histidin                       | 35.19 | 578  | MAP2598c | sulfate adenylyltransferase            | 419   | 100   |
| MAP4_1222 | hypothetical protein                                     | 110    | Rv0339c | Possible transcriptional regulatory p               | 44.44 | 832  | Mb0346c  | transcriptional regulator                           | 44.44 | 832  | Mv01137  | hypothetical protein                                | 100   | 110  | BCG_0376c | transcriptional regulatory protein                  | 44.44 | 832  | MAP2597c | hypothetical protein                   | 110   | 99.09 |
| MAP4_1223 | fatty-acyl-CoA ligase                                    | 579    | Rv1185c | Probable fatty-acyl-AMP ligase fadL                 | 71.16 | 578  | Mb0117c  | acyl-CoA synthetase                                 | 71.16 | 578  | Mv011328 | acyl-CoA synthetase                                 | 98.1  | 579  | BCG_1247c | acyl-CoA synthetase                                 | 71.16 | 578  | MAP2596c | acyl-CoA synthetase                    | 579   | 100   |
| MAP4_1224 | PPE family protein                                       | 552    | Rv0256c | PPE family protein PPE2                             | 55.22 | 556  | Mb0262c  | PPE family protein                                  | 55.22 | 556  | Mv011329 | PPE family protein                                  | 98.73 | 555  | BCG_0294c | PPE family protein                                  | 55.22 | 556  | MAP2595c | hypothetical protein                   | 585   | 99.21 |
| MAP4_1225 | hypothetical protein                                     | 78.13  | Rv1186c | hypothetical protein                                | 78.13 | 538  | Mv01138c | hypothetical protein                                | 78.13 | 538  | Mv01130  | hypothetical protein                                | 99.43 | 530  | BCG_1248c | hypothetical protein                                | 78.13 | 538  | MAP2594c | hypothetical protein                   | 530   | 100   |
| MAP4_1226 | pyrroline-5-carboxylate dehydrogenase                    | 546    | Rv1187  | Probable pyrroline-5-carboxylate dehy               | 88.64 | 543  | Mb01219  | pyrroline-5-carboxylate dehydro                     | 88.64 | 543  | Mv01131  | pyrroline-5-carboxylate dehydro                     | 99.63 | 555  | BCG_1249  | pyrroline-5-carboxylate dehyd                       | 88.64 | 543  | MAP2593c | hypothetical protein                   | 546   | 100   |
| MAP4_1227 | Proline dehydrogenase                                    | 300    | Rv1188  | Probable proline dehydrogenase                      | 73.21 | 329  | Mb01220  | proline dehydrogenase                               | 73.21 | 329  | Mv01132  | proline dehydrogenase                               | 99.28 | 320  | BCG_1250  | proline dehydrogenase                               | 73.21 | 329  | MAP2592c | hypothetical protein                   | 320   | 100   |
| MAP4_1228 | Transcriptional regulator, TetR family                   | 32.34  | Rv1534  | Probable transcriptional regulator                  | 32.34 | 225  | Mb01561  | transcriptional regulator                           | 32.34 | 225  | Mv01133  | TetR family transcriptional regulat                 | 99.5  | 200  | BCG_1586  | transcriptional regulator                           | 32.34 | 225  | MAP2591  | hypothetical protein                   | 200   | 100   |
| MAP4_1229 | lipid transfer protein or keto acyl-CoA thiolase lip2    | 66.06  | Rv3540c | Probable lipid transfer protein or ket              | 66.06 | 386  | Mb03570c | lipid-transfer protein                              | 66.06 | 386  | Mv01133a | lipid-transfer protein                              | 99.49 | 389  | BCG_3604c | lipid-transfer protein                              | 66.06 | 386  | MAP2590  | lipid-transfer protein                 | 389   | 100   |
| MAP4_1230 | hypothetical protein                                     | 153    | Rv3341c | hypothetical protein                                | 46.67 | 129  | Mb03571c | hypothetical protein                                | 46.67 | 129  | Mv01134  | hypothetical protein                                | 100   | 153  | BCG_3605c | hypothetical protein                                | 46.67 | 129  | MAP2589  | hypothetical protein                   | 153   | 100   |
| MAP4_1231 | acyl-CoA dehydrogenase                                   | 41.01  | Rv3413  | Probable acyl-CoA dehydrogenase F                   | 41.01 | 373  | Mb03572c | acyl-CoA dehydrogenase                              | 41.01 | 373  | Mv01134  | acyl-CoA dehydrogenase domain-c                     | 98.12 | 373  | BCG_3606c | acyl-CoA dehydrogenase fadE2                        | 41.01 | 373  | MAP2588  | hypothetical protein                   | 373   | 100   |
| MAP4_1232 | hypothetical protein                                     | 47.01  | Rv342c  | hypothetical protein                                | 47.01 | 311  | Mb03572c | hypothetical protein                                | 47.01 | 311  | Mv01137  | hypothetical protein                                | 98.25 | 317  | BCG_3606c | hypothetical protein                                | 47.01 | 311  | MAP2587c | hypothetical protein                   | 184   | 100   |
| MAP4_1233 | hypothetical protein                                     | 36.26  | Rv342c  | hypothetical protein                                | 36.26 | 311  | Mv01137c | hypothetical protein                                | 36.26 | 311  | Mv01137  | hypothetical protein                                | 98.25 | 317  | BCG_3606c | hypothetical protein                                | 36.26 | 311  | MAP2586  | hypothetical protein                   | 181   | 100   |
| MAP4_1234 | acyl-CoA dehydrogenase                                   | 51.87  | Rv3504  | Probable acyl-CoA dehydrogenase F                   | 51.87 | 400  | Mv03534  | acyl-CoA dehydrogenase                              | 51.87 | 400  | Mv01138  | acyl-CoA dehydrogenase                              | 99.75 | 394  | BCG_3568  | acyl-CoA dehydrogenase fadE2                        | 51.87 | 400  | MAP2585  | hypothetical protein                   | 394   | 100   |
| MAP4_1235 | putative cytochrome P450 hydroxylase                     | 398    | Rv318c  | Probable cytochrome P450 monoox                     | 40.1  | 398  | Mb03573c | cytochrome P450 125                                 | 34.32 | 433  | Mv01139  | cytochrome P450 superfamily prot                    | 99.75 | 398  | BCG_3609c | cytochrome P450 125 cyp125                          | 34.32 | 433  | MAP2584  | hypothetical protein                   | 398   | 100   |
| MAP4_1236 | putative cytochrome P450 hydroxylase                     | 44.65  | Rv0793  | Probable cytochrome P450 hydroxylase                | 44.65 | 469  | Mb0793   | cytochrome P450 hydroxylase                         | 44.65 | 469  | Mv01139  | cytochrome P450 superfamily prot                    | 99.75 | 398  | BCG_3609c | cytochrome P450 125 cyp125                          | 44.65 | 469  | MAP2583c | hypothetical protein                   | 469   | 100   |
| MAP4_1237 | CoA-transferase                                          | 763    | Rv1866  | Probable acetyl-adenylyltransferase                 | 76.3  | 732  | Mb01897  | hypothetical protein                                | 76.3  | 732  | Mv01134  | RNA polymerase sigma factor                         | 98.75 | 732  | BCG_195c  | hypothetical protein                                | 76.3  | 732  | MAP2582c | hypothetical protein                   | 732   | 99.87 |
| MAP4_1238 | hydroxylase, alpha/beta hydrolase family protein         | 300    | Rv1191  | hypothetical protein                                | 77.08 | 304  | Mv01123  | hydroxylase, alpha/beta hydrolase fa                | 77.08 | 304  | Mv01134  | hydroxylase, alpha/beta hydrolase fa                | 99.67 | 302  | BCG_1251  | RNA polymerase sigma factor                         | 77.08 | 304  | MAP2581c | hypothetical protein                   | 302   | 100   |
| MAP4_1239 | putative acyl-CoA ligase                                 | 473    | Rv1193  | Probable fatty-acyl-CoA ligase fadD                 | 83.93 | 473  | Mb01225  | acyl-CoA synthetase                                 | 83.93 | 473  | Mv011343 | acyl-CoA synthetase                                 | 99.58 | 473  | BCG_1253  | acyl-CoA synthetase                                 | 83.93 | 473  | MAP2580c | acyl-CoA synthetase                    | 473   | 100   |
| MAP4_1240 | putative conserved membrane transport protein            | 64.93  | Rv1200  | Probable conserved integral memb                    | 64.93 | 425  | Mb01232  | integral membrane transport                         | 64.93 | 425  | Mv01134  | major facilitator family protein tra                | 99.55 | 444  | BCG_1260  | integral membrane transport p                       | 64.93 | 425  | MAP2579c | hypothetical protein                   | 444   | 100   |
| MAP4_1241 | transposase                                              | 317    | Rv2101  | TetR family transcriptional regulator               | 88.33 | 317  | Mb01233c | transposase                                         | 88.33 | 317  | Mv01134  | transposase                                         | 99.59 | 317  | BCG_1261  | transposase                                         | 88.33 | 317  | MAP2578  | hypothetical protein                   | 317   | 99.87 |
| MAP4_1242 | transposase, IS900                                       | 406    | Rv0797  | Putative transposase for insertion                  | 78.83 | 369  | Mb0360   | transposase                                         | 78.83 | 369  | Mv01139  | transposase fusion protein                          | 29.01 | 350  | BCG_1807  | transposase fusion protein                          | 78.83 | 369  | MAP2577c | hypothetical protein                   | 406   | 100   |
| MAP4_1243 | PE family protein                                        | 78.188 | Rv1788  | PE family protein PE18                              | 63.22 | 99   | Mb1876   | PE family protein                                   | 63.22 | 99   | Mv01136  | PE family protein                                   | 100   | 278  | BCG_1820  | PE family protein                                   | 63.22 | 99   | MAP2576c | hypothetical protein                   | 278   | 100   |
| MAP4_1244 | PPE family protein                                       | 383    | Rv2768c | PPE family protein PPE43                            | 49.49 | 394  | Mb2790c  | PPE family protein                                  | 49.49 | 394  | Mv01137  | PPE family protein                                  | 99.48 | 383  | BCG_2785c | PPE family protein                                  | 49.49 | 394  | MAP2575c | hypothetical protein                   | 383   | 100   |
| MAP4_1245 | succinyl-diaminopimelate desuccinylase                   | 85.03  | Rv1202  | Probable succinyl-diaminopimelate                   | 85.03 | 354  | Mb01240  | succinyl-diaminopimelate desu                       | 85.03 | 354  | Mv01134  | succinyl-diaminopimelate desuccin                   | 98.87 | 354  | BCG_1262  | succinyl-diaminopimelate desu                       | 85.03 | 354  | MAP2574c | succinyl-diaminopimelate desuccinylase | 354   | 100   |
| MAP4_1246 | hypothetical protein                                     | 52.27  | Rv1204c | hypothetical protein                                | 52.27 | 362  | Mb01236c | hypothetical protein                                | 52.27 | 362  | Mv01136  | TPP repeat-containing protein                       | 98.74 | 362  | BCG_1263  | hypothetical protein                                | 52.27 | 362  | MAP2573  | hypothetical protein                   | 362   | 100   |
| MAP4_1247 | LuxN decarboxylase family protein                        | 187    | Rv1205  | hypothetical protein                                | 68.28 | 187  | Mb01237  | hypothetical protein                                | 68.28 | 187  | Mv01135  | hypothetical protein                                | 100   | 187  | BCG_1265  | hypothetical protein                                | 68.28 | 187  | MAP2572c | hypothetical protein                   | 187   | 100   |
| MAP4_1248 | fatty-acyl-CoA ligase                                    | 592    | Rv1206  | Probable fatty-acyl-CoA ligase fadD                 | 82.18 | 597  | Mb01238  | long-chain-acyl-CoA synthetase                      | 82.18 | 597  | Mv01137  | long-chain-acyl-CoA synthetase                      | 99.49 | 592  | BCG_1266  | long-chain-acyl-CoA synthetase                      | 82.18 | 597  | MAP2571c | long-chain-acyl-CoA synthetase         | 592   | 100   |
| MAP4_1249 | Dihydropterate synthase 2                                | 307    | Rv1207  | Dihydropterate synthase 2 f0P2 f0P2                 | 88.62 | 318  | Mv01239  | dihydropterate synthase 2                           | 88.62 | 318  | Mv01239  | dihydropterate synthase 2                           | 99.66 | 291  | BCG_1267  | dihydropterate synthase 2 fo                        | 88.62 | 318  | MAP2570c | f0P2                                   | 307   | 100   |
| MAP4_1250 | glucosyl-3-phosphoglycerate synthase                     | 82.07  | Rv1208  | Probable glucosyl-3-phosphoglycer                   | 82.07 | 324  | Mb01240  | glucosyl-3-phosphoglycerate                         | 82.07 | 324  | Mv01     |                                                     |       |      |           |                                                     |       |      |          |                                        |       |       |

Table S1 continued

|           |                                                          |       |         |                                       |       |     |          |                                   |        |     |          |                                         |       |       |
|-----------|----------------------------------------------------------|-------|---------|---------------------------------------|-------|-----|----------|-----------------------------------|--------|-----|----------|-----------------------------------------|-------|-------|
| MAP4_1301 | col1-shock DEAD-box protein A                            | 566   | Rv1253  | Probable cold-shock DEAD-box protein  | 81.48 | 563 | MAP1253  | col1-shock DEAD-box protein A     | 81.66  | 563 | MAP2521c | DeadD                                   | 566   | 100   |
| MAP4_1302 | putative acyltransferase                                 | 379   | Rv1254  | Probable cold-shock DEAD-box protein  | 79.63 | 383 | MB1286   | acyltransferase                   | 75.63  | 383 | MMV_1402 | acyltransferase, putative               | 98.42 | 379   |
| MAP4_1303 | transcriptional regulator, TetR family                   | 197   | Rv1255c | Transcriptional regulatory protein    | 75    | 202 | MAP1255c | transcriptional regulator         | 30.37  | 486 | MAP1255c | transcriptional regulator               | 30.37 | 197   |
| MAP4_1304 | putative cytochrome P450 hydroxylase                     | 487   | Rv1256c | Probable cytochrome P450 130 Cyp      | 83.86 | 405 | MW0789c  | cytochrome P450 123               | 34.408 | 405 | MV_1404  | transcriptional regulator               | 98.76 | 405   |
| MAP4_1305 | putative oxidoreductase                                  | 455   | Rv1257c | Probable oxidoreductase               | 87.47 | 455 | MB2301   | dehydrogenase                     | 34.57  | 459 | MV_1405  | oxidoreductase, FAD-binding             | 100   | 455   |
| MAP4_1306 | conserved membrane transport protein                     | 415   | Rv1258c | Probable conserved integral membrane  | 71.36 | 419 | MB1288c  | integral membrane transport       | 71.36  | 419 | MV_1406  | transporter, major facilitator family   | 99.01 | 405   |
| MAP4_1307 | Uracil-DNA glycosylase superfamily protein               | 275   | Rv1259  | Probable uracil DNA glycosylase, Uid  | 80.36 | 299 | MB1289   | hypothetical protein              | 70.36  | 299 | MV_1407  | Uracil-DNA glycosylase                  | 99.64 | 275   |
| MAP4_1308 | oxidoreductase                                           | 375   | Rv1260  | Probable oxidoreductase               | 81.33 | 372 | MB1290   | hypothetical protein              | 79.09  | 274 | MV_1408  | oxidoreductase                          | 99.74 | 375   |
| MAP4_1309 | luciferase family oxidoreductase                         | 343   | Rv1261c | Possible monooxygenase                | 88.32 | 395 | MB1971   | hypothetical protein              | 80.09  | 369 | MV_1409  | acetal monooxygenase alpha chain        | 99.71 | 343   |
| MAP4_1310 | hypothetical protein                                     | 144   | Rv1262c | Hypothetical hit-like protein         | 86.36 | 144 | MB1293c  | HIT-like protein                  | 87.12  | 144 | MV_1411  | HIT family protein                      | 100   | 147   |
| MAP4_1311 | amidase                                                  | 461   | Rv1263  | Probable amidase AmiB2 (aminohyd)     | 82.35 | 462 | MB1294   | amidase                           | 82.35  | 462 | MV_1414  | amidase                                 | 99.78 | 461   |
| MAP4_1314 | G/TU mismatch-specific uracil thymine DNA glycosylase    | 165   | Rv2692  | TRK system potassium uptake protei    | 29.41 | 220 | MB2711   | TRK system potassium uptake       | 29.41  | 220 | MV_1413  | T/U mismatch-specific DNA glycosylase   | 99.79 | 165   |
| MAP4_1315 | adenylyl cyclase                                         | 385   | Rv1264  | Adenylyl cyclase (ATP pyrophosphat)   | 78.13 | 397 | MB1295   | adenylyl cyclase                  | 72.07  | 397 | MV_1415  | Myco adenylyl cyclase, hol              | 100   | 385   |
| MAP4_1316 | hypothetical protein                                     | 84.9  | Rv1265  | hypothetical protein                  | 84.9  | 226 | MB1296   | hypothetical protein              | 84.9   | 226 | MV_1416  | hypothetical protein                    | 98.95 | 191   |
| MAP4_1319 | transcriptional regulatory protein EMBR                  | 380   | Rv1267c | Probable transcriptional regulatory p | 73.73 | 388 | MB1298c  | transcriptional regulator Emb     | 73.73  | 388 | MV_1418  | transcriptional regulator               | 99.74 | 381   |
| MAP4_1320 | transposase, IS4 family protein                          | 557   | Rv1386  | Possible transposase                  | 25.95 | 234 | MB3418   | transposase                       | 25.95  | 234 | MV_1419  | ABC transporter ATP-binding prote       | 29.31 | 862   |
| MAP4_1321 | conserved secreted protein                               | 111   | Rv1271c | Conserved hypothetical secreted pro   | 48.62 | 113 | MB3020   | hypothetical protein              | 48.62  | 113 | MV_1420  | hypothetical protein                    | 98.18 | 110   |
| MAP4_1322 | drug-transport transmembrane ATP-binding protein A       | 79.65 | 631     | Probable drug-transport transmem      | 79.65 | 631 | MB1303c  | drug-transport transmembr         | 79.65  | 631 | MV_1420  | ABC transporter                         | 96.87 | 638   |
| MAP4_1323 | drug-transport transmembrane ATP-binding protein A       | 585   | Rv1275c | Probable drug-transport transmem      | 78.38 | 582 | MB1304c  | drug-transport transmembr         | 78.38  | 582 | MV_1421  | ABC transporter ATP-binding prote       | 98.1  | 585   |
| MAP4_1324 | lipoprotein LprB                                         | 184   | Rv1276  | Possible lipoprotein LprB             | 82.16 | 185 | MB1305   | lipoprotein LprB                  | 82.16  | 185 | MV_1423  | LprB protein                            | 99.42 | 171   |
| MAP4_1325 | lipoprotein LprC                                         | 189   | Rv1275  | Possible lipoprotein LprC             | 85.64 | 180 | MB1306   | lipoprotein LprC                  | 85.64  | 180 | MV_1424  | LprC protein                            | 100   | 189   |
| MAP4_1326 | putative histidine phosphatase superfamily (branch 1)    | 167   | Rv1276c | hypothetical protein                  | 68.35 | 158 | MB1307c  | hypothetical protein              | 67.72  | 158 | MV_1425  | phosphoglycerate mutase                 | 98.2  | 167   |
| MAP4_1327 | REP1312 repeat protein                                   | 483   | Rv1276c | hypothetical protein                  | 63.97 | 477 | MB1308c  | hypothetical protein              | 64.78  | 471 | MV_1426  | hypothetical protein                    | 91.72 | 472   |
| MAP4_1328 | hypothetical protein                                     | 383   | Rv1277  | hypothetical protein                  | 82.77 | 417 | MB1309   | hypothetical protein              | 82.77  | 417 | MV_1427  | hypothetical protein                    | 98.17 | 383   |
| MAP4_1329 | hypothetical protein                                     | 876   | Rv1278  | hypothetical protein                  | 72.15 | 875 | MB1309   | hypothetical protein              | 72.15  | 875 | MV_1428  | hypothetical protein                    | 98.4  | 876   |
| MAP4_1330 | hydroalase, alpha-beta fold family protein               | 414   | Rv1938  | Hydroalase, alpha-beta fold family    | 31.46 | 356 | MB1973   | epoxide hydrolase                 | 31.46  | 356 | MV_1430  | alpha/beta hydrolase                    | 98.79 | 414   |
| MAP4_1331 | periplasmic oligopeptide-binding lipoprotein oppA        | 518   | Rv1280c | Probable periplasmic oligopeptide-bi  | 81.82 | 591 | MB1121   | periplasmic oligopeptide-bind     | 81.82  | 591 | MV_1429  | extracellular solute-binding protei     | 99.46 | 558   |
| MAP4_1332 | oligopeptide-transport ATP-binding protein ABC transp    | 611   | Rv1281c | Probable oligopeptide-transport inte  | 84.31 | 612 | MB1292c  | oligopeptide-transport inte       | 84.31  | 612 | MV_1430  | ABC transporter ATP-binding prote       | 99.02 | 611   |
| MAP4_1333 | oligopeptide-transport membrane protein ABC transp       | 86.6  | Rv1282c | Probable oligopeptide-transport inte  | 86.6  | 291 | MB1131c  | ABC transporter permease          | 86.6   | 291 | MV_1432  | ABC transporter permease                | 98.31 | 308   |
| MAP4_1334 | oligopeptide-transport membrane protein ABC transp       | 84.92 | Rv1283c | Probable oligopeptide-transport inte  | 84.92 | 325 | MB1314c  | oligopeptide-transport integr     | 84.92  | 325 | MV_1433  | ABC transporter permease                | 99.69 | 324   |
| MAP4_1335 | putative carbonic anhydrase                              | 163   | Rv1284  | Beta-carbonic anhydrase               | 80.98 | 163 | MB1155   | hypothetical protein              | 80.98  | 163 | MV_1434  | carbonic anhydrase                      | 99.39 | 163   |
| MAP4_1336 | hypothetical protein                                     | 148   | Rv1332c | hypothetical protein                  | 34.62 | 144 | MB1598   | hypothetical protein              | 34.62  | 144 | MV_1435  | hypothetical protein                    | 99.22 | 129   |
| MAP4_1337 | putative adenylyltransferase subunit 2                   | 89.42 | Rv1279c | Probable sulfate adenylyltransferase  | 89.42 | 332 | MB1310c  | sulfate adenylyltransferase       | 89.42  | 332 | MV_1436  | putative adenylyltransferase subun      | 99.22 | 332   |
| MAP4_1338 | bifunctional sulfate adenylyltransferase/adenylylsulfate | 88.38 | Rv1286  | Probable bifunctional enzyme CypN     | 88.38 | 614 | MB1317   | bifunctional sulfate adenylyltra  | 88.38  | 614 | MV_1437  | bifunctional sulfate adenylyltransf     | 99.51 | 616   |
| MAP4_1339 | putative transcriptional regulator, RvZ family           | 161   | Rv1289  | hypothetical protein                  | 89.44 | 161 | MB1439   | Stas protein                      | 89.44  | 161 | MV_1439  | Stas protein                            | 99.37 | 169   |
| MAP4_1340 | hypothetical protein                                     | 131   | Rv1300  | Probable SSRA-binding protein Smp     | 40.91 | 160 | MB1272c  | SSrA-binding protein              | 40.91  | 160 | MV_1440  | hypothetical protein                    | 100   | 131   |
| MAP4_1341 | glyoxalase/bleomycin resistance protein/dioxygenase      | 137   | Rv0274  | hypothetical protein                  | 25.32 | 193 | MB0280   | hypothetical protein              | 25.32  | 193 | MV_1448  | glyoxalase/bleomycin resistance pr      | 99.27 | 137   |
| MAP4_1342 | putative endopeptidase, luciferase family protein        | 292   | Rv0293c | Probable oxidoreductase               | 35.33 | 282 | MB1376   | hypothetical protein              | 35.33  | 282 | MV_1449  | hypothetical protein                    | 98.29 | 292   |
| MAP4_1343 | hypothetical protein                                     | 286   | Rv1200c | Possible transmembrane protein C      | 29.83 | 191 | MB1812   | hypothetical protein              | 29.83  | 191 | MV_1442  | hypothetical protein                    | 98.29 | 286   |
| MAP4_1344 | putative ion transport protein                           | 581   | Rv1200c | Possible transmembrane cation tran    | 28.81 | 355 | MV_1443  | TriA domain-containing prote      | 28.81  | 355 | MV_1443  | TriA domain-containing prote            | 99.83 | 581   |
| MAP4_1345 | hypothetical protein                                     | 123   | Rv0442c | hypothetical protein                  | 46.88 | 265 | MB2068c  | hypothetical protein              | 46.88  | 265 | MV_1444  | steroid 17alpha-isomerase               | 99.19 | 123   |
| MAP4_1346 | putative phosphohydrolase, NUDIX family                  | 203   | Rv1700  | NUDX hydrolase                        | 35.2  | 207 | MB1276   | hypothetical protein              | 35.2   | 207 | MV_1446  | nuhx hydrolase                          | 99.5  | 203   |
| MAP4_1347 | hypothetical protein                                     | 395   | Rv1271c | Conserved hypothetical secreted pro   | 81.08 | 313 | MB1302c  | hypothetical protein              | 81.08  | 313 | MV_1447  | hypothetical protein                    | 99.39 | 395   |
| MAP4_1348 | hypothetical protein                                     | 218   | Rv1276c | hypothetical protein                  | 65.94 | 255 | MB1577c  | hypothetical protein              | 65.94  | 255 | MV_1447  | hypothetical protein                    | 100   | 218   |
| MAP4_1349 | hypothetical protein                                     | 163   | Rv3547  | Deazaflavin-dependent nitroreducta    | 41.18 | 151 | MB1457   | hypothetical protein              | 41.18  | 151 | MV_1448  | hypothetical protein                    | 98.21 | 168   |
| MAP4_1350 | hypothetical protein                                     | 145   | Rv1829  | hypothetical protein                  | 25.71 | 164 | MB1478   | lysR family transcriptional reg   | 25.71  | 164 | MV_1478  | hypothetical protein                    | 63.64 | 156   |
| MAP4_1351 | putative conserved membrane protein                      | 365   | Rv0272c | Possible conserved transmembrane      | 59.51 | 323 | MB1202c  | transmembrane protein             | 59.51  | 323 | MV_1479  | hypothetical protein                    | 98.41 | 362   |
| MAP4_1352 | hypothetical protein                                     | 48.48 | Rv0277A | hypothetical protein                  | 48.48 | 29  | MB1297A  | hypothetical protein              | 48.48  | 29  | MV_1479  | hypothetical protein                    | 99.98 | 48    |
| MAP4_1353 | Arginyl-HMG synthetase                                   | 570   | Rv1292  | Probable arginyl-HMG synthetase A     | 89.82 | 550 | MB1324   | arginyl-HMG synthetase            | 89.82  | 550 | MV_1724  | arginyl-HMG synthetase                  | 97.42 | 882   |
| MAP4_1354 | Diaminopimelate decarboxylase                            | 452   | Rv1293  | Diaminopimelate decarboxylase Lys     | 85.65 | 447 | MV_1508  | diaminopimelate decarboxylas      | 85.65  | 447 | MV_1508  | diaminopimelate decarboxylas            | 99.88 | 472   |
| MAP4_1355 | homoserine dehydrogenase                                 | 441   | Rv1294  | Probable homoserine dehydrogenase     | 90.7  | 441 | MV_1509  | homoserine dehydrogenase          | 90.7   | 441 | MV_1509  | homoserine dehydrogenase                | 99.77 | 441   |
| MAP4_1356 | threonine synthase                                       | 360   | Rv1295  | Threonine synthase ThrC (Lys)         | 89.72 | 360 | MB1217   | threonine synthase                | 89.72  | 360 | MV_1510  | threonine synthase                      | 99.72 | 360   |
| MAP4_1357 | hypothetical protein                                     | 315   | Rv1296  | Probable homoserine kinase ThrB       | 78.78 | 315 | MB1228   | hypothetical protein              | 78.78  | 315 | MV_1511  | hypothetical protein                    | 99.36 | 315   |
| MAP4_1358 | hypothetical protein                                     | 101   | Rv3644c | Possible DNA polymerase III subunit d | 40    | 401 | MB1512   | hypothetical protein              | 40     | 401 | MV_1512  | hypothetical protein                    | 99.79 | 101   |
| MAP4_1359 | Transcription termination factor Rho                     | 620   | Rv1299  | Transcription termination factor      | 80.19 | 602 | MB1519   | transcription termination fact    | 80.19  | 602 | MV_1519  | transcription termination factor Rh     | 99    | 596   |
| MAP4_1360 | SOS ribosomal protein L31 RpmE                           | 80    | Rv1298  | SOS ribosomal protein L31 RpmE        | 87.5  | 80  | MV_1515  | SOS ribosomal protein L31         | 87.5   | 80  | MV_1515  | SOS ribosomal protein L31               | 100   | 80    |
| MAP4_1361 | peptide chain release factor 1                           | 357   | Rv1299  | Probable peptide chain release fact   | 88.8  | 357 | MB1310   | peptide chain release factor 1    | 88.8   | 357 | MV_1516  | peptide chain release factor 1          | 99.72 | 357   |
| MAP4_1362 | putative methionine methylase, Henk family               | 72.51 | Rv1302  | Probable Henk protein homolog He      | 72.51 | 329 | MB1312   | hypothetical protein              | 72.51  | 329 | MV_1517  | putative methionine methylase, Henk fam | 99.79 | 72.51 |
| MAP4_1363 | hypothetical protein, YnfC/SuA5 family                   | 219   | Rv1301  | hypothetical protein                  | 82.31 | 217 | MB1313   | hypothetical protein              | 82.31  | 217 | MV_1518  | hypothetical protein                    | 98.63 | 219   |
| MAP4_1364 | UDP-phosphate/alpha-N-acetylglucosaminyl transferase     | 407   | Rv1302  | Probable undecaprenyl-phosphate a     | 93.72 | 404 | MB1314   | undecaprenyl-phosphate a          | 93.72  | 404 | MV_1519  | glycosyl transferase, group 4 family    | 100   | 407   |
| MAP4_1365 | hypothetical protein                                     | 160   | Rv1303  | hypothetical protein                  | 73.75 | 161 | MB1315   | hypothetical protein              | 73.75  | 161 | MV_1520  | hypothetical protein                    | 98.75 | 160   |
| MAP4_1366 | ATP synthase A chain                                     | 252   | Rv1304  | Probable ATP synthase A chain AtpB    | 84.46 | 250 | MB1336   | ATP synthase F0F1 subunit A       | 84.46  | 250 | MV_1521  | F0F1 ATP synthase subunit A             | 99.6  | 252   |
| MAP4_1367 | ATP synthase B chain                                     | 90    | Rv1305  | Probable ATP synthase B chain AtpE    | 77.65 | 81  | MB1337   | ATP synthase F0F1 subunit C       | 77.65  | 81  | MV_1522  | F0F1 ATP synthase subunit C             | 100   | 90    |
| MAP4_1368 | ATP synthase B chain atpF                                | 177   | Rv1306  | Probable ATP synthase B chain AtpF    | 77.65 | 171 | MB1338   | ATP synthase F0F1 subunit D       | 77.65  | 171 | MV_1523  | F0F1 ATP synthase subunit D             | 100   | 178   |
| MAP4_1369 | ATP synthase delta chain                                 | 446   | Rv1307  | Probable ATP synthase delta chain A   | 76.68 | 446 | MV_1524  | F0F1 ATP synthase subunit delta   | 76.68  | 446 | MV_1524  | F0F1 ATP synthase subunit delta         | 99.78 | 446   |
| MAP4_1370 | ATP synthase alpha chain                                 | 554   | Rv1308  | Probable ATP synthase alpha chain A   | 91.6  | 549 | MB1340   | ATP synthase F0F1 subunit al      | 91.6   | 549 | MV_1525  | F0F1 ATP synthase subunit alpha         | 100   | 554   |
| MAP4_1371 | ATP synthase gamma chain                                 | 87    | Rv1309  | Probable ATP synthase gamma chain     | 87.87 | 305 | MB1341   | ATP synthase F0F1 subunit ga      | 87.87  | 305 | MV_1526  | F0F1 ATP synthase subunit gamma         | 100   | 304   |
| MAP4_1372 | ATP synthase beta chain                                  | 485   | Rv1310  | Probable ATP synthase beta chain A    | 94.8  | 486 | MV_1527  | ATP synthase F0F1 subunit be      | 94.8   | 486 | MV_1527  | F0F1 ATP synthase subunit beta          | 99.79 | 485   |
| MAP4_1373 | ATP synthase epsilon chain                               | 121   | Rv1311  | Probable ATP synthase epsilon chain   | 89.26 | 121 | MB1343   | ATP synthase F0F1 subunit ep      | 89.26  | 121 | MV_1528  | F0F1 ATP synthase subunit eps           | 100   | 121   |
| MAP4_1374 | putative conserved secreted protein                      | 147   | Rv1312  | Conserved hypothetical secreted pro   | 91.85 | 147 | MB1534   | hypothetical protein              | 90.85  | 144 | MV_1530  | hypothetical protein                    | 100   | 143   |
| MAP4_1375 | putative acylamino adenylyl transferase                  | 195   | Rv1314  | hypothetical protein                  | 82.45 | 193 | MB1529   | ATP-coil(II)amin adenylyltransfer | 82.45  | 193 | MV_1529  | ATP-coil(II)amin adenylyltransfer       | 99.49 |       |

Table S1 continued

|           |                                                     |     |         |                                            |       |     |         |                                     |       |     |           |                                     |       |     |           |                                   |       |     |          |                            |     |       |
|-----------|-----------------------------------------------------|-----|---------|--------------------------------------------|-------|-----|---------|-------------------------------------|-------|-----|-----------|-------------------------------------|-------|-----|-----------|-----------------------------------|-------|-----|----------|----------------------------|-----|-------|
| MAP4_1404 | hypothetical protein                                | 116 | Rv1342c | hypothetical protein                       | 70.83 | 120 | Mv1559  | hypothetical protein                | 100   | 116 | BCG_1404c | hypothetical protein                | 70.83 | 120 | MAP2419   | hypothetical protein              | 116   | 100 |          |                            |     |       |
| MAP4_1405 | putative conserved lipoprotein LPD                  | 130 | Rv1343c | Probable conserved lipoprotein LPD         | 82.64 | 126 | Mb1378c | lipoprotein LPD                     | 81.82 | 126 | MV_1560   | hypothetical protein                | 97.32 | 112 | BCG_1405c | lipoprotein LPD                   | 81.82 | 126 | MAP2418  | hypothetical protein       | 116 | 100   |
| MAP4_1406 | putative lipoprotein Lpp                            | 174 | Rv2080  | Lipoprotein Lpp                            | 31.98 | 167 | Mb1380  | lipoprotein Lpp                     | 32.48 | 167 | MV_1569   | hypothetical protein                | 97.32 | 150 | BCG_1406c | lipoprotein Lpp                   | 31.98 | 167 | MAP2417  | hypothetical protein       | 100 | 100   |
| MAP4_1407 | transposase 34 family protein                       | 157 | Rv3386  | Possible transposase                       | 25.95 | 234 | Mb1341b | ABC transporter ATP-binding protein | 25.95 | 234 | MV_3010   | ABC transporter ATP-binding protein | 99.09 | 110 | BCG_3485  | transposase                       | 25.95 | 234 | MAP2336c | hypothetical protein       | 100 | 100   |
| MAP4_1408 | hypothetical protein                                | 157 | Rv0275c | Possible transcriptional regulatory p      | 29.93 | 241 | Mb1285  | cold-shock DEAD-box protein         | 36.54 | 567 | MV_1565   | hypothetical protein                | 99.09 | 110 | BCG_1313  | cold-shock dead-box protein a     | 36.54 | 563 | MAP2415c | hypothetical protein       | 100 | 100   |
| MAP4_1409 | ABC transporter ATP-binding protein                 | 879 | Rv1348  | iron-regulated transporter IrtA            | 79.33 | 859 | Mb1383  | drug-transport transmembr           | 79.33 | 859 | MV_1566   | ABC transporter ATP-binding protein | 97.68 | 862 | BCG_1410  | drug-transport transmembr         | 79.33 | 859 | MAP2414c | hypothetical protein       | 100 | 100   |
| MAP4_1410 | ABC transporter ATP-binding protein                 | 569 | Rv1349  | iron-regulated transporter IrtB            | 77.08 | 579 | Mb1384  | drug-transport transmembr           | 77.08 | 579 | MV_1567   | ABC transporter ATP-binding protein | 98.96 | 578 | BCG_1411  | drug-transport transmembr         | 77.08 | 579 | MAP2413c | hypothetical protein       | 869 | 100   |
| MAP4_1411 | phosphotransferase enzyme family protein            | 318 | Rv1368  | putative aminoglycoside phosphotransferase | 26.71 | 378 | Mb1393  | phosphotransferase                  | 26.62 | 378 | MV_1568   | phosphotransferase enzyme family    | 98.99 | 355 | BCG_1412  | phosphotransferase                | 26.71 | 378 | MAP2412c | hypothetical protein       | 100 | 100   |
| MAP4_1412 | putative lipoprotein Lpp                            | 142 | Rv1311c | Probable lipoprotein Lpp                   | 59    | 201 | Mb1346c | lipoprotein Lpp                     | 59    | 201 | MV_1569   | lipoprotein Lpp                     | 99.33 | 142 | BCG_1300c | lipoprotein Lpp                   | 59    | 201 | MAP2411c | hypothetical protein       | 100 | 100   |
| MAP4_1413 | short-chain dehydrogenase                           | 273 | Rv0687  | Probable short-chain type dehydrog         | 48.35 | 275 | Mb0706  | 3-ketoacyl-ACP reductase            | 48.35 | 275 | MV_1570   | carveol dehydrogenase               | 99.27 | 273 | BCG_0736  | 3-ketoacyl-ACP reductase          | 48.35 | 275 | MAP2410  | hypothetical protein       | 100 | 100   |
| MAP4_1414 | acyl-CoA dehydrogenase                              | 397 | Rv2747c | Probable acyl-CoA dehydrogenase F          | 34.31 | 389 | Mb0221c | acyl-CoA dehydrogenase              | 35.98 | 387 | MV_1571   | acyl-CoA dehydrogenase              | 98.74 | 397 | BCG_0252c | acyl-CoA dehydrogenase FadE       | 35.98 | 388 | MAP2409  | FadE25_3                   | 397 | 100   |
| MAP4_1415 | 3-oxoacyl-ACP reductase                             | 249 | Rv1350  | Probable 3-oxoacyl-ACP carrier pro         | 86.94 | 247 | Mb1385  | 3-ketoacyl-ACP reductase            | 86.94 | 247 | MV_1572   | short chain dehydrogenase           | 99.59 | 246 | BCG_1412  | 3-ketoacyl-ACP reductase          | 86.94 | 247 | MAP2408  | 3-ketoacyl-ACP reductase   | 249 | 99.6  |
| MAP4_1416 | Acyl-CoA acetyltransferase                          | 406 | Rv1074c | Probable beta-ketoacyl-CoA thiolest        | 39.57 | 405 | Mb1100c | acyl-CoA acetyltransferase          | 39.57 | 405 | MV_1573   | acyl-CoA acetyltransferase          | 99.26 | 406 | BCG_1132c | acyl-CoA acetyltransferase        | 39.57 | 405 | MAP2407c | acyl-CoA acetyltransferase | 406 | 100   |
| MAP4_1417 | CoA-transferase family III protein                  | 397 | Rv3277  | hypothetical protein                       | 27.53 | 394 | Mb3300  | hypothetical protein                | 27.53 | 394 | MV_1574   | L-carnitine dehydratase/bile acid-H | 100   | 399 | BCG_1301  | hypothetical protein              | 27.53 | 394 | MAP2406c | hypothetical protein       | 397 | 100   |
| MAP4_1418 | acyl-CoA dehydrogenase                              | 458 | Rv0215c | Probable acyl-CoA dehydrogenase F          | 45.68 | 357 | Mb0221c | acyl-CoA dehydrogenase              | 46.25 | 386 | MV_1575   | acyl-CoA dehydrogenase              | 100   | 397 | BCG_0252c | acyl-CoA dehydrogenase FadE       | 45.99 | 388 | MAP2405c | FadE1_1                    | 397 | 100   |
| MAP4_1419 | putative regulator PutR for proliferation, GntR fam | 120 | Rv0165c | Probable transcriptional regulatory p      | 40.51 | 223 | Mb0170c | GntR family transcriptional re      | 42.05 | 271 | MV_1576   | GntR family transcriptional regulat | 99.13 | 230 | BCG_0201c | GntR family transcriptional regul | 42.05 | 271 | MAP2404c | hypothetical protein       | 100 | 100   |
| MAP4_1420 | hypothetical protein                                | 130 | Rv1352  | hypothetical protein                       | 43.22 | 123 | Mb1387  | hypothetical protein                | 43.22 | 123 | MV_1578   | hypothetical protein                | 96.67 | 120 | BCG_1414  | hypothetical protein              | 43.22 | 123 | MAP2403c | hypothetical protein       | 100 | 100   |
| MAP4_1421 | AMP-binding enzyme family protein                   | 518 | Rv2050c | Probable fatty-acyl-CoA ligase FadD        | 30.17 | 547 | Mb2533c | AMP-binding protein                 | 30.17 | 547 | MV_1577   | AMP-binding protein                 | 97.68 | 518 | BCG_2525c | AMP-binding protein               | 30.17 | 547 | MAP2402  | hypothetical protein       | 518 | 100   |
| MAP4_1422 | faty-acyl-CoA ligase FadD                           | 524 | Rv2050c | Probable fatty-acyl-CoA ligase FadD        | 30.45 | 547 | Mb2533c | AMP-binding protein                 | 30.45 | 547 | MV_1578   | acyl-CoA dehydrogenase              | 99.05 | 524 | BCG_2525c | AMP-binding protein               | 30.45 | 547 | MAP2401  | FadD35                     | 524 | 100   |
| MAP4_1423 | long-chain-fatty-acyl-CoA ligase                    | 485 | Rv1427c | Probable long-chain-fatty-acyl-CoA li      | 26.12 | 535 | Mb1462c | acyl-CoA synthetase                 | 26.12 | 535 | MV_1580   | AMP-dependent synthetase and lig    | 98.14 | 485 | BCG_1488c | acyl-CoA synthetase               | 26.12 | 535 | MAP2400  | hypothetical protein       | 485 | 100   |
| MAP4_1424 | enoyl-CoA hydratase                                 | 266 | Rv2821  | Probable enoyl-CoA hydratase EChA          | 34.21 | 249 | Mb2855  | enoyl-CoA hydratase                 | 34.21 | 249 | MV_1581   | enoyl-CoA hydratase/isomerase       | 100   | 268 | BCG_2851  | enoyl-CoA hydratase               | 34.21 | 249 | MAP2399  | EChA16_3                   | 270 | 100   |
| MAP4_1425 | Enoyl-CoA hydratase                                 | 270 | Rv3516  | Possible enoyl-CoA hydratase EChA1         | 34.36 | 263 | Mb3545  | enoyl-CoA hydratase                 | 34.36 | 263 | MV_1582   | enoyl-CoA hydratase/isomerase       | 100   | 270 | BCG_3579  | enoyl-CoA hydratase               | 34.36 | 263 | MAP2398  | hypothetical protein       | 270 | 100   |
| MAP4_1426 | Enoyl-CoA hydratase                                 | 276 | Rv1342c | Probable enoyl-CoA hydratase EChA          | 35    | 268 | Mb1174c | enoyl-CoA hydratase                 | 35    | 268 | MV_1583   | enoyl-CoA hydratase/isomerase       | 99.23 | 260 | BCG_1204c | enoyl-CoA hydratase               | 35    | 268 | MAP2397  | EChA10                     | 286 | 99.6  |
| MAP4_1427 | hypothetical protein                                | 231 | Rv0156c | hypothetical protein                       | 27.83 | 214 | Mb0363c | hypothetical protein                | 27.83 | 214 | MV_1584   | hypothetical protein                | 100   | 231 | BCG_0394c | hypothetical protein              | 27.83 | 214 | MAP2396c | hypothetical protein       | 231 | 100   |
| MAP4_1428 | Enoyl-CoA hydratase                                 | 296 | Rv0692  | Possible enoyl-CoA hydratase EChA2         | 29.97 | 312 | Mb0692  | enoyl-CoA hydratase                 | 29.97 | 312 | MV_1585   | enoyl-CoA hydratase/isomerase       | 99.32 | 296 | BCG_0722  | enoyl-CoA hydratase               | 29.97 | 312 | MAP2395  | hypothetical protein       | 296 | 100   |
| MAP4_1429 | Transcriptional regulator, TetR family              | 268 | Rv1353c | Probable transcriptional regulatory p      | 79.12 | 261 | Mb1383c | transcriptional regulator           | 79.12 | 261 | MV_1586   | TetR family transcriptional regulat | 99.62 | 262 | BCG_1415c | transcriptional regulatory prot   | 79.12 | 261 | MAP2394  | hypothetical protein       | 268 | 100   |
| MAP4_1430 | Short chain dehydrogenase                           | 265 | Rv1483  | 3-oxoacyl-ACP carrier protein regul        | 28.17 | 247 | Mb1519  | 3-oxoacyl-ACP reductase             | 28.17 | 247 | MV_1587   | oxidoreductase, short chain dehyd   | 99.62 | 265 | BCG_1545  | 3-oxoacyl-ACP reductase           | 28.17 | 247 | MAP2393c | hypothetical protein       | 265 | 100   |
| MAP4_1431 | hydrodiphenylamine synthetase                       | 338 | Rv1098c | Probable hydrodiphenylamine synthet        | 35.71 | 386 | Mb1593  | hydrodiphenylamine synthetase       | 35.71 | 386 | MV_1588   | hydrodiphenylamine synthetase       | 99.19 | 338 | BCG_1050c | hydrodiphenylamine synthetase     | 35.71 | 386 | MAP2392c | hypothetical protein       | 338 | 100   |
| MAP4_1432 | hypothetical protein                                | 317 | Rv0101  | Probable peptide synthetase Nrp lin        | 41.38 | 251 | Mb0104  | hypothetical protein                | 41.38 | 251 | MV_1589   | hypothetical protein                | 100   | 317 | BCG_0101  | hypothetical protein              | 41.38 | 251 | MAP2391c | hypothetical protein       | 317 | 100   |
| MAP4_1433 | Enoyl-CoA hydratase                                 | 270 | Rv1070c | Probable enoyl-CoA hydratase EChA          | 33.71 | 257 | Mb1099c | enoyl-CoA hydratase                 | 33.71 | 257 | MV_1590   | enoyl-CoA hydratase                 | 98.54 | 274 | BCG_1128c | enoyl-CoA hydratase               | 33.71 | 257 | MAP2390c | acyl-CoA hydratase         | 270 | 100   |
| MAP4_1434 | amidohydrolyase family protein                      | 400 | Rv1434c | Probable enoyl-CoA hydratase EChA          | 32.79 | 268 | Mb1174c | enoyl-CoA hydratase                 | 32.79 | 268 | MV_1591   | amidohydrolyase                     | 100   | 400 | BCG_1204c | enoyl-CoA hydratase               | 32.79 | 268 | MAP2389c | hypothetical protein       | 400 | 100   |
| MAP4_1435 | fatty-acyl-CoA ligase                               | 545 | Rv3515c | Fatty-acyl-CoA ligase FadD19               | 35.56 | 548 | Mb3544c | acyl-CoA synthetase                 | 35.56 | 548 | MV_1592   | acyl-CoA synthetase                 | 98.9  | 545 | BCG_3578c | acyl-CoA synthetase               | 35.56 | 548 | MAP2388c | acyl-CoA synthetase        | 545 | 100   |
| MAP4_1436 | hydrodiphenylamine protein                          | 317 | Rv3520c | hypothetical protein                       | 32.76 | 278 | Mb1596c | hypothetical protein                | 32.76 | 278 | MV_1593   | acyl-CoA dehydrogenase              | 99.49 | 276 | BCG_1072c | hypothetical protein              | 32.76 | 278 | MAP2387c | hypothetical protein       | 317 | 100   |
| MAP4_1437 | putative acyl-CoA dehydrogenase                     | 397 | Rv1933c | Probable acyl-CoA dehydrogenase F          | 27.25 | 363 | Mb1936c | acyl-CoA dehydrogenase              | 27.25 | 363 | MV_1594   | acyl-CoA dehydrogenase              | 100   | 397 | BCG_1972c | acyl-CoA dehydrogenase FadE       | 27.25 | 363 | MAP2386c | hypothetical protein       | 397 | 100   |
| MAP4_1438 | putative acyl-CoA dehydrogenase                     | 397 | Rv3543c | Probable acyl-CoA dehydrogenase F          | 32.77 | 387 | Mb3573c | acyl-CoA dehydrogenase              | 32.77 | 387 | MV_1595   | acyl-CoA dehydrogenase              | 99.24 | 397 | BCG_3607c | acyl-CoA dehydrogenase FadE2      | 32.77 | 387 | MAP2385c | hypothetical protein       | 397 | 100   |
| MAP4_1439 | putative thiolase                                   | 381 | Rv1627c | Probable nonspecific lipid-transfer p      | 31.5  | 402 | Mb1653c | lipid-transfer protein              | 31.5  | 402 | MV_1596   | thiolase                            | 99.48 | 381 | BCG_1665c | lipid-transfer protein            | 31.5  | 402 | MAP2384  | hypothetical protein       | 381 | 100   |
| MAP4_1440 | putative acyl-CoA transferase/carnitine dehydratase | 408 | Rv3272  | hypothetical protein                       | 30.1  | 394 | Mb3300  | hypothetical protein                | 29.85 | 394 | MV_1597   | L-carnitine dehydratase/bile acid-H | 99.26 | 404 | BCG_3301  | hypothetical protein              | 29.25 | 394 | MAP2383  | hypothetical protein       | 408 | 100   |
| MAP4_1441 | putative cytochrome P450 hydroxylase                | 400 | Rv3218c | Probable cytochrome P450 monoox            | 35.23 | 398 | Mb0299c | cytochrome P450 123                 | 30.13 | 407 | MV_1598   | cytochrome P450 superfamily pro     | 99.25 | 400 | BCG_2939c | cytochrome P450 125 cyp126        | 35.23 | 394 | MAP2382  | hypothetical protein       | 400 | 100   |
| MAP4_1442 | short-chain type dehydrogenase/reductase            | 280 | Rv3085  | Probable short-chain type dehydrog         | 46.62 | 276 | Mb1312  | short-chain type dehydrogen         | 46.62 | 276 | MV_1599   | oxidoreductase, short chain dehyd   | 99.64 | 280 | BCG_1110  | short-chain type dehydrogenase    | 46.62 | 276 | MAP2381  | hypothetical protein       | 280 | 100   |
| MAP4_1443 | fatty-acyl-CoA ligase FadD19                        | 590 | Rv3515c | Fatty-acyl-CoA ligase FadD19               | 40.51 | 548 | Mb3544c | acyl-CoA synthetase                 | 40.51 | 548 | MV_1600   | acyl-CoA synthetase                 | 99.09 | 550 | BCG_3578c | acyl-CoA synthetase               | 40.51 | 548 | MAP2380  | acyl-CoA synthetase        | 550 | 100   |
| MAP4_1444 | hypothetical protein                                | 210 | Rv0356c | hypothetical protein                       | 53.81 | 214 | Mb0363c | hypothetical protein                | 53.81 | 214 | MV_1601   | thioesterase                        | 98.57 | 210 | BCG_0394c | hypothetical protein              | 53.81 | 214 | MAP2379  | hypothetical protein       | 210 | 100   |
| MAP4_1445 | hydrolase, isochromatase family                     | 209 | Rv2043c | Pyrazinamidase/nicotinamidase Pnc          | 30.43 | 186 | Mb2096c | pyrazinamidase                      | 30.43 | 186 | MV_1602   | isochromatase                       | 99.52 | 209 | BCG_2062c | pyrazinamidase/nicotinamidase     | 30.43 | 186 | MAP2378  | hypothetical protein       | 209 | 100   |
| MAP4_1446 | Rieske (2Fe-2S) domain-containing protein           | 337 | Rv3526  | Oxygenase component of 3-ketose            | 26.91 | 386 | Mb3556c | oxidoreductase                      | 26.91 | 386 | MV_1603   | oxidoreductase                      | 99.41 | 337 | BCG_3590  | oxidoreductase                    | 26.91 | 386 | MAP2377  | hypothetical protein       | 337 | 100   |
| MAP4_1447 | monooxygenase                                       | 340 | Rv1934c | Probable monooxygenase                     | 31.69 | 492 | Mb1929c | monooxygenase                       | 31.69 | 492 | MV_1604   | steroid monooxygenase               | 98.33 | 340 | BCG_1454c | monooxygenase                     | 31.69 | 492 | MAP2376c | hypothetical protein       | 340 | 100   |
| MAP4_1448 | hypothetical protein                                | 373 | Rv2827c | hypothetical protein                       | 32.33 | 413 | Mb2660c | hypothetical protein                | 32.33 | 413 | MV_1605   | hypothetical protein                | 98.12 | 373 | BCG_2654c | hypothetical protein              | 32.33 | 413 | MAP2375c | hypothetical protein       | 373 | 100   |
| MAP4_1449 | hypothetical protein                                | 126 | Rv0119  | Probable fatty-acyl-CoA ligase FadD        | 24.19 | 525 | Mb0213  | acyl-CoA synthetase                 | 24.19 | 525 | MV_1606   | hypothetical protein                | 100   | 126 | BCG_0153  | acyl-CoA synthetase               | 24.19 | 525 | MAP2374c | hypothetical protein       | 117 | 99.15 |
| MAP4_1450 | oxidoreductase                                      | 346 | Rv2951c | Possible oxidoreductase                    | 29.63 | 381 | Mb1597c | oxidoreductase                      | 29.63 | 381 | MV_1607   | hypothetical protein                | 98.83 | 342 | BCG_2972c | oxidoreductase                    | 29.63 | 381 | MAP2373c | hypothetical protein       | 346 | 100   |
| MAP4_1451 |                                                     |     |         |                                            |       |     |         |                                     |       |     |           |                                     |       |     |           |                                   |       |     |          |                            |     |       |



Table S1 continued

|           |                                                         |      |         |                                                  |       |      |         |                                                  |       |      |         |                                                  |       |      |           |                                                  |       |      |          |                                      |       |       |
|-----------|---------------------------------------------------------|------|---------|--------------------------------------------------|-------|------|---------|--------------------------------------------------|-------|------|---------|--------------------------------------------------|-------|------|-----------|--------------------------------------------------|-------|------|----------|--------------------------------------|-------|-------|
| MAP4_1503 | 3-to-5' oligoribonuclease (arn)                         | 215  | Rv2511  | Oligoribonuclease Om                             | 83.72 | 215  | Mb2539  | oligoribonuclease                                | 83.72 | 215  | MV_1664 | oligoribonuclease                                | 99.53 | 215  | BCG_2531  | oligoribonuclease                                | 83.72 | 215  | MAP2320  | oligoribonuclease                    | 83.72 | 100   |
| MAP4_1504 | hyposulfite protein                                     | 521  | Rv2530  | Oligoribonuclease F                              | 73.56 | 533  | Mb2538  | oligoribonuclease                                | 73.56 | 533  | MV_1665 | ATP-binding protein                              | 97.89 | 521  | BCG_2530  | hyposulfite protein                              | 73.56 | 533  | MAP2316  | hyposulfite protein                  | 73.56 | 100   |
| MAP4_1505 | Probable short-chain dehydrogenase                      | 269  | Rv2509  | Probable short-chain dehydrogenase               | 86.89 | 268  | Mb2537  | short-chain type dehydrogenase                   | 86.89 | 268  | MV_1666 | short-chain dehydrogenase                        | 99.61 | 269  | BCG_2529  | short-chain type dehydrogenase                   | 86.89 | 268  | MAP2315  | hyposulfite protein                  | 268   | 100   |
| MAP4_1506 | putative conserved proline rich membrane protein        | 466  | Rv2508c | Probable conserved proline rich membrane protein | 75.83 | 445  | Mb2536  | Probable conserved proline rich membrane protein | 75.83 | 445  | MV_1667 | Probable conserved proline rich membrane protein | 99.77 | 433  | BCG_2528c | Probable conserved proline rich membrane protein | 75.83 | 445  | MAP2317c | hyposulfite protein                  | 268   | 100   |
| MAP4_1507 | putative conserved proline rich membrane protein        | 253  | Rv2507  | Possible conserved proline rich mem              | 57.14 | 273  | Mb2535  | hyposulfite protein                              | 57.14 | 273  | MV_1668 | hyposulfite protein                              | 99.21 | 253  | BCG_2527  | proline rich membrane protein                    | 57.14 | 273  | MAP2316  | hyposulfite protein                  | 253   | 100   |
| MAP4_1508 | Transcriptional regulator, TetR family                  | 118  | Rv2506  | Possible transcriptional regulatory r            | 80.18 | 215  | Mb2534  | TetR family transcriptional regulat              | 80.18 | 215  | MV_1669 | TetR family transcriptional regulat              | 98.98 | 197  | BCG_2526  | TetR family transcriptional regulat              | 80.18 | 215  | MAP2315  | hyposulfite protein                  | 218   | 100   |
| MAP4_1509 | Acetyl-propiolyl-CoA carboxylase subunit beta           | 533  | Rv2502c | Probable acetyl-propiolyl-CoA carb               | 90.55 | 529  | Mb2530  | acetyl-propiolyl-CoA carboxyl                    | 90.55 | 529  | MV_1670 | Carboxyl transferase                             | 99.25 | 533  | BCG_2522c | acetyl-propiolyl-coa carboxyl                    | 90.55 | 529  | MAP2314c | AcCo1                                | 519   | 100   |
| MAP4_1510 | Acetyl-coenzyme A carboxylase subunit alpha             | 671  | Rv2501c | Probable acetyl-propiolyl-coenzyme A             | 82.6  | 664  | Mb2529  | acetyl-propiolyl-coenzyme A carb                 | 82.6  | 664  | MV_1671 | acetyl-propiolyl-coenzyme A carb                 | 98.66 | 671  | BCG_2521c | acetyl-propiolyl-coenzyme A carb                 | 82.6  | 664  | MAP2314c | AcCo1                                | 671   | 100   |
| MAP4_1511 | Acyl-CoA dehydrogenase                                  | 388  | Rv2500c | Possible acyl-CoA dehydrogenase Fa               | 90.93 | 394  | Mb2528  | acyl-CoA dehydrogenase                           | 90.93 | 394  | MV_1672 | acyl-CoA dehydrogenase                           | 99.74 | 388  | BCG_2520c | acyl-CoA dehydrogenase factE                     | 90.93 | 394  | MAP2312c | fadE19                               | 388   | 100   |
| MAP4_1512 | oxidase regulatory-related protein                      | 166  | Rv2499c | Possible oxidase regulatory-related pr           | 91.56 | 185  | Mb2527c | oxidase regulatory-enzyme                        | 91.56 | 185  | MV_1673 | MoAc domain-containing protein                   | 100   | 166  | BCG_2519c | oxidase regulatory-related pro                   | 91.56 | 185  | MAP2311c | hyposulfite protein                  | 166   | 100   |
| MAP4_1513 | Crabtree (Pro-35)-lyase beta subunit                    | 273  | Rv2498c | Probable Crabtree (pro-35)-lyase beta            | 80.67 | 273  | Mb2526c | Crabtree (Pro-35)-lyase subunit                  | 80.67 | 273  | MV_1674 | CytP                                             | 98.9  | 273  | BCG_2518c | Crabtree (pro-35)-lyase subunit b                | 80.67 | 273  | MAP2310c | hyposulfite protein                  | 273   | 100   |
| MAP4_1514 | pyruvate dehydrogenase E1 component alpha subunit       | 363  | Rv2497c | Probable branched-chain keto acid                | 81.97 | 367  | Mb2525c | pyruvate dehydrogenase E1 c                      | 81.97 | 367  | MV_1675 | pyruvate dehydrogenase E1 compo                  | 98.9  | 363  | BCG_2517c | pyruvate dehydrogenase E1 co                     | 81.97 | 367  | MAP2309c | PdhA                                 | 363   | 100   |
| MAP4_1515 | pyruvate dehydrogenase E1 subunit beta                  | 348  | Rv2496c | Probable branched-chain keto acid                | 83.02 | 348  | Mb2524c | pyruvate dehydrogenase E1 c                      | 83.02 | 348  | MV_1676 | pyruvate dehydrogenase E1 compo                  | 99.15 | 351  | BCG_2516c | pyruvate dehydrogenase E1 co                     | 83.02 | 348  | MAP2308c | hyposulfite protein                  | 348   | 100   |
| MAP4_1516 | hydrolytic amidase 5-steroyltransferase F2 component p  | 351  | Rv2495c | Probable branched-chain keto acid                | 72.05 | 393  | Mb2523c | branched-chain alpha keto aci                    | 72.05 | 393  | MV_1677 | branched-chain alpha keto aci de                 | 99.23 | 358  | BCG_2515c | branched-chain alpha keto aci de                 | 72.05 | 393  | MAP2307c | branched-chain alpha-keto acid dehyd | 351   | 100   |
| MAP4_1517 | enoyl-CoA hydratase                                     | 256  | Rv2486c | Probable enoyl-CoA hydratase EChA                | 81.64 | 256  | Mb2518  | enoyl-CoA hydratase                              | 81.64 | 256  | MV_1678 | enoyl-CoA hydratase                              | 100   | 256  | BCG_2504  | enoyl-CoA hydratase                              | 81.64 | 256  | MAP2306  | enoyl-CoA hydratase                  | 256   | 100   |
| MAP4_1518 | hyposulfite protein                                     | 136  | Rv1590  | hyposulfite protein                              | 47.83 | 79   | Mb2516  | hyposulfite protein                              | 47.83 | 79   | MV_1679 | hyposulfite protein                              | 98.53 | 136  | BCG_1628  | hyposulfite protein                              | 47.83 | 79   | MAP2305  | hyposulfite protein                  | 136   | 100   |
| MAP4_1519 | cutinase precursor                                      | 219  | Rv1884c | Probable cutinase precursor CFP21                | 52.68 | 217  | Mb2006c | cutinase CFP21                                   | 52.68 | 217  | MV_1682 | serine esterase cutinase                         | 99.09 | 219  | BCG_1798  | cutinase cur1                                    | 46.93 | 218  | MAP2304  | hyposulfite protein                  | 213   | 100   |
| MAP4_1520 | hyposulfite protein                                     | 100  | Rv1969  | Non-family protein Mac3D                         | 27.69 | 423  | Mb2007  | hyposulfite protein                              | 27.69 | 423  | MV_1683 | hyposulfite protein                              | 100   | 102  | BCG_2974  | hyposulfite protein                              | 35.71 | 418  | MAP2303c | hyposulfite protein                  | 102   | 100   |
| MAP4_1521 | transposase, ISMΔ27                                     | 435  | Rv0755a | Possible transposase (fragment)                  | 83.02 | 61   | Mb0776c | transposase                                      | 83.02 | 61   | MV_1684 | transposase                                      | 99.27 | 435  | BCG_0807c | transposase                                      | 83.02 | 61   | MAP0664c | hyposulfite protein                  | 402   | 100   |
| MAP4_1522 | carboxylesterase                                        | 102  | Rv2485c | Probable carboxylesterase LipQ                   | 70.91 | 421  | Mb2510  | carboxylesterase LipQ                            | 70.91 | 421  | MV_1685 | alpha/beta hydrolase                             | 99.28 | 415  | BCG_2503c | carboxylesterase LipQ                            | 70.91 | 421  | MAP2302c | hyposulfite protein                  | 423   | 100   |
| MAP4_1523 | acylttransferase, wsl/dgatmid subfamily protein         | 489  | Rv2484c | Possible triacylglycerol synthase (da            | 85.54 | 491  | Mb2509c | hyposulfite protein                              | 85.54 | 491  | MV_1686 | acylttransferase, wsl/dgatmid sub                | 99.39 | 491  | BCG_2502c | acylttransferase                                 | 85.54 | 491  | MAP2300c | hyposulfite protein                  | 489   | 100   |
| MAP4_1524 | bifunctional phospholipid biosynthesis enzyme pLcD      | 609  | Rv2483c | Possible transmembrane phospholip                | 89.59 | 580  | Mb2508c | bifunctional L-3-phosphoseri                     | 89.59 | 580  | MV_1687 | acylttransferase                                 | 96.42 | 583  | BCG_2501c | transmembrane phospholipid                       | 89.59 | 580  | MAP2299c | hyposulfite protein                  | 357   | 99.72 |
| MAP4_1525 | glycerol-3-phosphate acyltransferase                    | 784  | Rv2482c | Probable glycerol-3-phosphate acyltr             | 79.59 | 789  | Mb2507c | glycerol-3-phosphate acyltr                      | 79.59 | 789  | MV_1688 | glycerol-3-phosphate acyltr                      | 99.39 | 784  | BCG_2500c | glycerol-3-phosphate acyltr                      | 79.59 | 789  | MAP2298c | glycerol-3-phosphate acyltransferase | 784   | 100   |
| MAP4_1526 | putative conserved integral membra                      | 689  | Rv0102  | Probable conserved integral membra               | 32.4  | 461  | Mb0105  | hyposulfite protein                              | 32.4  | 461  | MV_1692 | Acyl transferase                                 | 98.98 | 689  | BCG_0103  | integral membrane protease                       | 32.4  | 461  | MAP2297c | hyposulfite protein                  | 689   | 99.85 |
| MAP4_1527 | hyposulfite protein, single-strand DNA binding protein  | 160  | Rv2478c | hyposulfite protein                              | 88.79 | 161  | Mb2505c | hyposulfite protein                              | 88.79 | 161  | MV_1694 | hyposulfite protein                              | 99.38 | 160  | BCG_2498  | hyposulfite protein                              | 88.79 | 161  | MAP2296c | hyposulfite protein                  | 160   | 100   |
| MAP4_1528 | macrolide-transferase ATP-binding protein ABC transport | 558  | Rv2477c | Probable macrolide-transferase ATP-bi            | 94.97 | 558  | Mb2504c | ABC transporter ATP-binding                      | 94.97 | 558  | MV_1695 | ABC transporter ATP-binding pro                  | 100   | 558  | BCG_2497c | ABC transporter ATP-binding p                    | 94.97 | 558  | MAP2295c | ABC transporter ATP-binding protein  | 558   | 100   |
| MAP4_1529 | NAD-dependent glutamate dehydrogenase                   | 1616 | Rv2476c | Probable NAD-dependent glutamat                  | 83.68 | 1624 | Mb2503c | NAD-dependent glutamat d                         | 83.68 | 1624 | MV_1696 | NAD-glutamate dehydrogenase                      | 99.51 | 1616 | BCG_2496c | NAD-dependent glutamate de                       | 83.68 | 1624 | MAP2294c | hyposulfite protein                  | 1616  | 100   |
| MAP4_1530 | hyposulfite protein                                     | 123  | Rv2475c | hyposulfite protein                              | 77.17 | 127  | Mb2502c | hyposulfite protein                              | 77.17 | 127  | MV_1697 | hyposulfite protein                              | 99.77 | 123  | BCG_2495c | hyposulfite protein                              | 77.17 | 127  | MAP2293c | hyposulfite protein                  | 123   | 44.8  |
| MAP4_1531 | Alpha-glucosidase AqIIa                                 | 713  | Rv2471  | Probable alpha-glucosidase AqIIa                 | 81.58 | 713  | Mb2498  | alpha-glucosidase                                | 81.58 | 713  | MV_1700 | alpha-glucosidase                                | 95.48 | 713  | BCG_2491  | alpha-glucosidase aqIIa                          | 81.58 | 713  | MAP2292c | hyposulfite protein                  | 713   | 100   |
| MAP4_1533 | oxygen-binding protein globin gB0                       | 129  | Rv2470  | globin (oxygen-binding protein) gB0              | 86.4  | 128  | Mb2497  | globin Gb0                                       | 86.4  | 128  | MV_1701 | hyposulfite protein                              | 100   | 129  | BCG_2490  | globin (oxygen-binding protein)                  | 86.4  | 128  | MAP2291c | Gb0                                  | 129   | 100   |
| MAP4_1534 | putative HNH endonuclease family protein                | 215  | Rv2469c | hyposulfite protein                              | 81.7  | 222  | Mb2496c | HNH endonuclease                                 | 81.7  | 222  | MV_1702 | HNH endonuclease                                 | 100   | 215  | BCG_2489c | hyposulfite protein                              | 81.7  | 222  | MAP2290c | hyposulfite protein                  | 215   | 100   |
| MAP4_1535 | hyposulfite protein                                     | 79   | Rv2468a | hyposulfite protein                              | 82.05 | 77   | Mb2495c | PPE family protein                               | 82.05 | 77   | MV_1703 | hyposulfite protein                              | 100   | 76   | BCG_0393c | PPE family protein                               | 81.67 | 302  | MAP2289c | hyposulfite protein                  | 79    | 100   |
| MAP4_1536 | hyposulfite protein                                     | 155  | Rv2468b | hyposulfite protein                              | 83.12 | 167  | Mb2494c | hyposulfite protein                              | 83.12 | 167  | MV_1705 | hyposulfite protein                              | 100   | 155  | BCG_2488c | hyposulfite protein                              | 83.12 | 167  | MAP2288c | hyposulfite protein                  | 155   | 98.5  |
| MAP4_1537 | hyposulfite protein, N                                  | 825  | Rv2467  | Probable aminopeptidase N PgpII                  | 85.63 | 861  | Mb2493c | aminopeptidase N                                 | 85.63 | 861  | MV_1706 | aminopeptidase N                                 | 98.49 | 825  | BCG_2487c | aminopeptidase N pgpII                           | 85.63 | 861  | MAP2287c | hyposulfite protein                  | 825   | 100   |
| MAP4_1538 | hyposulfite protein                                     | 207  | Rv2466c | hyposulfite protein                              | 81.64 | 207  | Mb2492c | hyposulfite protein                              | 81.64 | 207  | MV_1706 | hyposulfite protein                              | 99.03 | 207  | BCG_2486c | hyposulfite protein                              | 81.64 | 207  | MAP2286c | hyposulfite protein                  | 207   | 100   |
| MAP4_1539 | isomerase                                               | 159  | Rv2465c | ribose-5-phosphate isomerase                     | 91.08 | 162  | Mb2492c | ribose-5-phosphate isomerase                     | 91.08 | 162  | MV_1707 | ribose-5-phosphate isomerase                     | 100   | 159  | BCG_2485c | ribose-5-phosphate isomerase                     | 91.08 | 162  | MAP2285c | ribose-5-phosphate isomerase         | 159   | 100   |
| MAP4_1540 | DNA glycosylase                                         | 268  | Rv2464c | Possible DNA glycosylase                         | 81.65 | 268  | Mb2491c | DNA glycosylase                                  | 81.65 | 268  | MV_1708 | endonuclease VIII and DNA n-glyc                 | 99.25 | 268  | BCG_2484c | DNA glycosylase                                  | 81.65 | 268  | MAP2284c | hyposulfite protein                  | 268   | 100   |
| MAP4_1541 | ribonuclease lipP                                       | 396  | Rv2463  | Probable ribonuclease lipP                       | 82.8  | 394  | Mb2490c | ribonuclease                                     | 82.8  | 394  | MV_1709 | ribonuclease, putative                           | 100   | 396  | BCG_2483c | ribonuclease lipP                                | 82.8  | 394  | MAP2283c | hyposulfite protein                  | 396   | 100   |
| MAP4_1542 | trigger factor protein                                  | 464  | Rv2462c | Probable trigger factor (TF) protein             | 77.38 | 466  | Mb2488c | trigger factor                                   | 77.38 | 466  | MV_1712 | trigger factor                                   | 100   | 464  | BCG_2482c | trigger factor                                   | 77.6  | 466  | MAP2282c | hyposulfite protein                  | 464   | 100   |
| MAP4_1543 | ATP-dependent ctp protease proteolytic subunit c lipP   | 199  | Rv2461c | Probable ATP-dependent CLP prote                 | 92.46 | 200  | Mb2488c | ATP-dependent CLP protease                       | 92.46 | 200  | MV_1713 | ATP-dependent CLP protease                       | 100   | 199  | BCG_2481c | ATP-dependent CLP protease p                     | 92.46 | 200  | MAP2281c | ATP-dependent CLP protease proteol   | 199   | 100   |
| MAP4_1544 | ATP-dependent ctp protease proteolytic subunit c lipP   | 197  | Rv2460c | Probable ATP-dependent CLP prote                 | 97.62 | 214  | Mb2487c | ATP-dependent CLP protease                       | 97.62 | 214  | MV_1714 | ATP-dependent CLP protease                       | 100   | 211  | BCG_2480c | ATP-dependent CLP protease p                     | 97.62 | 214  | MAP2280c | ATP-dependent CLP protease proteol   | 197   | 100   |
| MAP4_1545 | Homocysteine S-methyltransferase                        | 306  | Rv2458  | Probable homocysteine S-methyltra                | 76.03 | 302  | Mb2485  | homocysteine methyltransfe                       | 76.03 | 302  | MV_1715 | homocysteine methyltransferase                   | 91.47 | 291  | BCG_2478  | homocysteine methyltransfer                      | 76.03 | 302  | MAP2279c | homocysteine methyltransferase       | 306   | 100   |
| MAP4_1546 | ATP-dependent CLP protease ATP-binding subunit CtpA     | 426  | Rv2457c | Probable ATP-dependent CLP prote                 | 89.36 | 426  | Mb2484c | ATP-dependent protease ATP                       | 89.36 | 426  | MV_1716 | ATP-dependent protease ATP                       | 100   | 426  | BCG_2477c | ATP-dependent protease ATP                       | 89.36 | 426  | MAP2278c | ATP-dependent protease ATP-binding   | 426   | 100   |
| MAP4_1547 | oxidoreductase subunit alpha                            | 656  | Rv2456  | Probable oxidoreductase (alpha sub               | 88.96 | 653  | Mb2482c | oxidoreductase subunit alpha                     | 88.96 | 653  | MV_1717 | oxidoreductase subunit alpha                     | 100   | 656  | BCG_2475c | oxidoreductase subunit alpha                     | 88.96 | 653  | MAP2277c | hyposulfite protein                  | 656   | 100   |
| MAP4_1548 | oxidoreductase beta subunit                             | 363  | Rv2454c | Probable oxidoreductase (beta subu               | 89.26 | 373  | Mb2481c | 2-oxoglutarate ferredoxin oxi                    | 89.26 | 373  | MV_1718 | 2-oxoglutarate ferredoxin oxi                    | 99.45 | 363  | BCG_2474c | 2-oxoglutarate ferredoxin oxi                    | 89.26 | 373  | MAP2276c | 2-oxoglutarate ferredoxin oxidoreduc | 363   | 100   |
| MAP4_1549 | Molybdopter-in-guanine dinucleotide biosynthesis pro    | 671  | Rv2453c | Molybdopter-in-guanine dinucleoti                | 67.71 | 201  | Mb2480c | molybdopter-in-guanine dinucl                    | 67.71 | 201  | MV_1719 | molybdopter-in-guanine dinucl                    | 98.98 | 197  | BCG_2473c | molybdopter-in-guanine dinucl                    | 67.71 | 201  | MAP2275c | molybdopter-in-guanine dinucleoti    | 671   | 100   |
| MAP4_1550 | Transposase                                             | 409  | Rv3640c | Probable transposase                             | 60    | 40   |         |                                                  |       |      |         |                                                  |       |      |           |                                                  |       |      |          |                                      |       |       |



Table S1 continued

|           |                                                            |      |         |                                           |       |     |         |                                    |       |     |          |                                      |       |     |           |                                    |       |     |          |                      |      |       |
|-----------|------------------------------------------------------------|------|---------|-------------------------------------------|-------|-----|---------|------------------------------------|-------|-----|----------|--------------------------------------|-------|-----|-----------|------------------------------------|-------|-----|----------|----------------------|------|-------|
| MAP4_1705 | hypothetical protein                                       | 267  | Rv0295c | hypothetical protein                      | 74.53 | 267 | MV0303c | hypothetical protein               | 74.53 | 267 | MV0_2058 | sulfolipinase                        | 99.61 | 258 | BCG_0335c | hypothetical protein               | 74.53 | 267 | MAP2118  | hypothetical protein | 257  | 100   |
| MAP4_1706 | hypothetical protein                                       | 255  | Rv0301c | Conserved integral membrane protein       | 58.8  | 254 | MV0331c | hypothetical protein               | 58.8  | 254 | MV0_2059 | TrnB1 protein                        | 99.61 | 255 | BCG_3556c | integral membrane protein          | 58.8  | 254 | MAP2117c | hypothetical protein | 265  | 100   |
| MAP4_1707 | MCE-family protein                                         | 422  | Rv0366c | MCE-family protein Mce3A                  | 52.97 | 425 | MV0296c | MCE-family protein Mce3A           | 35.04 | 420 | MV0_2060 | MCE-family factor Mce4               | 99.61 | 422 | BCG_0653c | MCE-family protein mce4A           | 35.04 | 420 | MAP2116c | MCE-family protein   | 492  | 100   |
| MAP4_1708 | MCE-family protein                                         | 342  | Rv1967  | MCE-family protein Mce3B                  | 57.89 | 343 | MV0296c | MCE-family protein Mce3B           | 48.1  | 343 | MV0_2060 | virulence factor Mce                 | 99.42 | 342 | BCG_0653c | MCE-family protein mce3B           | 48.1  | 343 | MAP2115c | hypothetical protein | 392  | 100   |
| MAP4_1709 | MCE-family protein                                         | 392  | Rv1968  | MCE-family protein Mce3C                  | 51.32 | 410 | MV0327c | MCE-family protein Mce3C           | 39.48 | 357 | MV0_2063 | virulence factor Mce                 | 99.42 | 342 | BCG_0653c | MCE-family protein mce3C           | 39.48 | 357 | MAP2114c | hypothetical protein | 492  | 100   |
| MAP4_1710 | MCE-family protein                                         | 447  | Rv1969  | MCE-family protein Mce3D                  | 55.95 | 423 | MV0318c | MCE-family protein Mce3D           | 40.31 | 530 | MV0_2064 | virulence factor Mce                 | 99.1  | 444 | BCG_0209  | MCE-family protein mce3D           | 40.31 | 530 | MAP2113c | hypothetical protein | 344  | 100   |
| MAP4_1711 | MCE-family lipoprotein                                     | 333  | Rv1970  | Possible Mce-family lipoprotein LprK      | 60.49 | 327 | MV0179  | MCE-family lipoprotein LprK        | 42.17 | 390 | MV0_2056 | virulence factor Mce                 | 60    | 386 | BCG_0210  | mce-family lipoprotein LprK        | 42.17 | 390 | MAP2112c | hypothetical protein | 473  | 100   |
| MAP4_1712 | MCE-family protein                                         | 489  | Rv1971  | MCE-family protein MCE1F                  | 55.68 | 437 | MV0180  | MCE-family protein MCE1F           | 36.7  | 514 | MV0_2069 | virulence factor Mce                 | 98.97 | 486 | BCG_0210  | MCE-family protein mce1F           | 36.7  | 514 | MAP2111c | hypothetical protein | 489  | 100   |
| MAP4_1713 | MCE-associated membrane protein                            | 203  | Rv1972  | Possible conserved MCE associated         | 51.11 | 191 | MV0190c | hypothetical protein               | 35.59 | 261 | MV0_2070 | hypothetical protein                 | 99.01 | 203 | BCG_1435c | hypothetical protein               | 36.16 | 261 | MAP2110c | hypothetical protein | 403  | 100   |
| MAP4_1715 | transposase_15000                                          | 406  | Rv0797  | Putative transposase for insertion        | 35.81 | 364 | MV0360  | transposase                        | 28.35 | 570 | MV0_1059 | transposase                          | 29.01 | 350 | BCG_3397  | transposase fusion protein         | 28.35 | 570 | MAP0304  | hypothetical protein | 206  | 100   |
| MAP4_1717 | hypothetical protein                                       | 155  | Rv1975  | hypothetical protein                      | 72.93 | 221 | MV2886c | methionine aminopeptidase          | 36.36 | 285 | MV0_2072 | hypothetical protein                 | 100   | 166 | BCG_2883c | methionine aminopeptidase          | 36.36 | 285 | MAP2106c | hypothetical protein | 155  | 100   |
| MAP4_1718 | hypothetical protein                                       | 92   | Rv2642  | Possible transcriptional regulatory p     | 26.67 | 126 | MV2675  | ArxR family aminopeptidase         | 26.67 | 126 | MV0_2173 | hypothetical protein                 | 95.45 | 96  | BCG_0637  | mce-family protein mce2BzA         | 47.62 | 516 | MAP2105c | hypothetical protein | 92   | 100   |
| MAP4_1719 | putative nitrate reductase                                 | 1411 | Rv2900c | Possible formate dehydrogenase H          | 29.33 | 779 | MV2924c | formate dehydrogenase H            | 29.33 | 779 | MV0_2076 | LppG protein                         | 99.43 | 409 | BCG_2921c | formate dehydrogenase H fhdH       | 29.33 | 779 | MAP2104  | fhdH                 | 1411 | 100   |
| MAP4_1720 | putative lipoprotein LppP                                  | 160  | Rv2300c | Possible lipoprotein LppP                 | 74.51 | 175 | MV2575c | lipoprotein LppP                   | 74.51 | 175 | MV0_2076 | LppG protein                         | 99.35 | 155 | BCG_2351c | lipoprotein LppP                   | 73.86 | 175 | MAP2103c | hypothetical protein | 145  | 100   |
| MAP4_1721 | membrane nitrite reduction protein narX                    | 485  | Rv0261c | Possible integral membrane nitrite        | 60.22 | 469 | MV0067c | integral membrane nitrite ext      | 60.22 | 469 | MV0_2079 | transporter, major facilitator fami  | 99.78 | 472 | BCG_0299c | integral membrane nitrite ext      | 60.22 | 469 | MAP2102c | NarX 1               | 485  | 100   |
| MAP4_1722 | Acyl-coenzyme A dehydrogenase                              | 690  | Rv0215c | Probable acyl-CoA dehydrogenase F         | 29.03 | 357 | MV0221c | acyl-CoA dehydrogenase             | 26.5  | 388 | MV0_2078 | acyl-CoA oxidase                     | 99.69 | 650 | BCG_0252c | acyl-CoA dehydrogenase FadE        | 26.5  | 388 | MAP2101c | hypothetical protein | 690  | 99.85 |
| MAP4_1723 | transmembrane ABC transporter ATP-binding protein          | 775  | Rv1747  | Possible conserved transmembrane          | 44.73 | 865 | MV0176c | ABC transporter ATP-binding        | 44.73 | 865 | MV0_3010 | ABC transporter ATP-binding prot     | 43.96 | 862 | BCG_1786c | transmembrane ABC transport        | 44.73 | 865 | MAP2100c | hypothetical protein | 586  | 100   |
| MAP4_1724 | Transcriptional regulator, MerR family                     | 162  | Rv2277  | hypothetical protein                      | 84.14 | 163 | MV0254  | hypothetical protein               | 84.14 | 163 | MV0_2081 | MerR family transcriptional regulat  | 98.77 | 175 | BCG_2348  | hypothetical protein               | 84.14 | 163 | MAP2099  | hypothetical protein | 162  | 99.38 |
| MAP4_1725 | transmembrane ATP-binding protein ABC transporter          | 723  | Rv2326c | Possible transmembrane ATP-binding        | 72.03 | 697 | MV0355c | transmembrane ATP-binding          | 72.03 | 697 | MV0_2081 | ABC transporter                      | 99.39 | 653 | BCG_2347c | transmembrane ABC transport        | 72.03 | 697 | MAP2098c | hypothetical protein | 724  | 100   |
| MAP4_1726 | Cobalt transport family protein                            | 284  | Rv2325c | hypothetical protein                      | 73.65 | 282 | MV0352c | hypothetical protein               | 73.65 | 282 | MV0_2083 | cobalt transport protein             | 99.3  | 274 | BCG_2346c | hypothetical protein               | 73.65 | 282 | MAP2097c | hypothetical protein | 284  | 100   |
| MAP4_1727 | Transcriptional regulator, AscX family                     | 148  | Rv2224  | Possible transcriptional regulator        | 91.22 | 148 | MV2351  | AscX family transcriptional regul  | 91.22 | 148 | MV0_2084 | AscX family transcriptional regulat  | 97.97 | 148 | BCG_2345c | AscX family transcriptional regul  | 91.22 | 148 | MAP2096c | hypothetical protein | 148  | 100   |
| MAP4_1728 | Aminidiotransferase, AscN family                           | 289  | Rv2232c | hypothetical protein                      | 74.74 | 302 | MV2350c | hypothetical protein               | 74.74 | 302 | MV0_2085 | amidinotransferase                   | 98.59 | 284 | BCG_2344c | hypothetical protein               | 74.74 | 302 | MAP2095c | hypothetical protein | 289  | 100   |
| MAP4_1729 | Oxithione aminotransferase                                 | 412  | Rv2232c | Probable oxithione aminotransferase       | 72.06 | 221 | MV2349c | oxithione aminotransferase         | 72.06 | 221 | MV0_2086 | oxithione-oxo-acyl transaminase      | 99.51 | 412 | BCG_2343c | oxithione aminotransferase (N)     | 72.06 | 221 | MAP2094c | fcdP1                | 412  | 100   |
| MAP4_1730 | periplasmic amino acid transport membrane protein rocF     | 483  | Rv2300c | Probable periplasmic amino acid transport | 80.97 | 476 | MV2347c | periplasmic amino acid transport   | 80.97 | 476 | MV0_2087 | amino acid transporter               | 98.92 | 461 | BCG_2341c | periplasmic amino acid transport   | 80.97 | 476 | MAP2093c | rocF                 | 483  | 100   |
| MAP4_1731 | periplasmic sugar-binding lipoprotein UspC                 | 445  | Rv2318  | Probable periplasmic sugar-binding        | 77.6  | 440 | MV2345  | periplasmic sugar-binding lipop    | 77.6  | 440 | MV0_2088 | extracellular solute-binding protein | 98.43 | 446 | BCG_2339  | periplasmic sugar-binding lipop    | 77.6  | 440 | MAP2092c | UspC                 | 445  | 100   |
| MAP4_1732 | sugar-transport membrane protein ABC transporter us        | 275  | Rv2317  | Probable sugar-transport integral mem     | 85.82 | 274 | MV2344  | sugar-transport integral mem       | 85.82 | 274 | MV0_2089 | ABC transporter permease             | 99.64 | 275 | BCG_2338  | sugar-transport integral memb      | 85.82 | 274 | MAP2091c | UspF                 | 275  | 100   |
| MAP4_1733 | sugar-transport membrane protein ABC transporter us        | 274  | Rv2316  | Probable sugar-transport integral mem     | 84.78 | 290 | MV2343  | sugar-transport integral mem       | 84.78 | 290 | MV0_2090 | ABC transporter permease             | 99.64 | 274 | BCG_2337  | sugar-transport integral memb      | 85.12 | 290 | MAP2090c | hypothetical protein | 294  | 100   |
| MAP4_1734 | putative modulator of DNA gyrase                           | 505  | Rv2312c | hypothetical protein                      | 85.15 | 505 | MV2342  | hypothetical protein               | 85.15 | 505 | MV0_2091 | modulator of DNA gyrase              | 98.55 | 505 | BCG_2336c | hypothetical protein               | 85.15 | 505 | MAP2089c | hypothetical protein | 505  | 100   |
| MAP4_1735 | hypothetical protein                                       | 457  | Rv2314c | hypothetical protein                      | 81.62 | 457 | MV2341c | hypothetical protein               | 81.62 | 457 | MV0_2092 | CaB5 protein                         | 97.41 | 457 | BCG_2335c | hypothetical protein               | 81.62 | 457 | MAP2088c | hypothetical protein | 457  | 100   |
| MAP4_1736 | hypothetical protein                                       | 288  | Rv2313c | hypothetical protein                      | 73.52 | 284 | MV2093  | hypothetical protein               | 73.52 | 284 | MV0_2093 | hypothetical protein                 | 98.26 | 288 | BCG_2334c | hypothetical protein               | 73.52 | 284 | MAP2087c | hypothetical protein | 288  | 100   |
| MAP4_1737 | hypothetical protein                                       | 166  | Rv2333c | integral membrane drug efflux prot        | 37.5  | 537 | MV2361c | integral membrane transport        | 37.5  | 537 | MV0_2094 | hypothetical protein                 | 100   | 140 | BCG_2355c | integral membrane transport p      | 37.5  | 537 | MAP2086c | hypothetical protein | 166  | 100   |
| MAP4_1738 | hypothetical protein                                       | 166  | Rv2333c | integral membrane drug efflux prot        | 37.5  | 537 | MV2361c | integral membrane transport        | 37.5  | 537 | MV0_2094 | hypothetical protein                 | 99.13 | 115 | BCG_2355c | integral membrane transport p      | 37.5  | 537 | MAP2086c | hypothetical protein | 166  | 71.83 |
| MAP4_1739 | hypothetical protein                                       | 41   | Rv3196c | Possible oxidoreductase                   | 30.3  | 214 | MV3030c | oxidoreductase                     | 30.3  | 214 | MV0_2101 | hypothetical protein                 | 98.3  | 307 | BCG_3400c | oxidoreductase                     | 30.3  | 214 | MAP2085c | hypothetical protein | 41   | 100   |
| MAP4_1740 | Aldehyde dehydrogenase                                     | 484  | Rv0223c | Probable aldehyde dehydrogenase           | 41.34 | 487 | MV2883c | aldehyde dehydrogenase             | 40    | 455 | MV0_2101 | hypothetical protein                 | 96.36 | 468 | BCG_2880c | aldehyde dehydrogenase aldH        | 40    | 455 | MAP2084c | hypothetical protein | 484  | 100   |
| MAP4_1741 | hypothetical protein                                       | 304  | Rv2345  | Possible conserved transmembrane          | 47.71 | 660 | MV2374  | transmembrane protein              | 47.71 | 660 | MV0_2102 | hypothetical protein                 | 96.07 | 305 | BCG_2368  | hypothetical protein               | 47.71 | 660 | MAP2083c | hypothetical protein | 304  | 100   |
| MAP4_1742 | hypothetical protein                                       | 479  | Rv2004c | hypothetical protein                      | 33.41 | 498 | MV2027c | hypothetical protein               | 33.41 | 498 | MV0_2104 | shikimate kinase                     | 46.15 | 176 | BCG_2021c | hypothetical protein               | 33.41 | 498 | MAP2082c | hypothetical protein | 479  | 100   |
| MAP4_1743 | putative major facilitator superfamily protein             | 576  | Rv1250  | Possible drug-transport integral mem      | 29.34 | 579 | MV2382  | drug-transport integral mem        | 29.34 | 579 | MV0_2104 | major facilitator superfamily prot   | 99.8  | 538 | BCG_1310  | drug-transport integral memb       | 29.34 | 579 | MAP2081c | hypothetical protein | 558  | 92.5  |
| MAP4_1744 | hypothetical protein                                       | 231  | Rv2315c | hypothetical protein                      | 27.78 | 275 | MV2349c | hypothetical protein               | 27.78 | 275 | MV0_2105 | hypothetical protein                 | 99.62 | 239 | BCG_2485c | hypothetical protein               | 27.78 | 275 | MAP2080c | hypothetical protein | 231  | 99.27 |
| MAP4_1745 | hypothetical protein                                       | 3051 | Rv1267c | Possible transcriptional regulatory       | 37.46 | 388 | MV3198c | transcriptional regulator Emb      | 37.46 | 388 | MV0_2268 | hypothetical protein                 | 98.1  | 384 | BCG_1326c | transcriptional regulatory prot    | 37.46 | 388 | MAP2079c | hypothetical protein | 3051 | 100   |
| MAP4_1746 | putative multi-sensor signal transduction histidine kinase | 855  | Rv2327  | Two component sensor histidine kin        | 35.29 | 573 | MV2052c | histidine kinase response regu     | 35.29 | 573 | MV0_2108 | stage II sporulation protein F (SpoI | 99.16 | 835 | BCG_2046c | histidine kinase response regu     | 34.97 | 573 | MAP2078c | hypothetical protein | 891  | 100   |
| MAP4_1747 | hypothetical protein                                       | 109  | Rv3687c | Anti-anti-sigma factor RfbB (anti-sig     | 35.94 | 122 | MV2671  | hypothetical protein               | 27.96 | 148 | MV0_2109 | sigma domain-containing protein      | 98.17 | 109 | BCG_2665  | hypothetical protein               | 27.96 | 148 | MAP2077c | hypothetical protein | 109  | 100   |
| MAP4_1748 | Methyltransferase, Leucine carboxymethyl transferase       | 319  | Rv3787c | hypothetical protein                      | 63.48 | 308 | MV3818c | hypothetical protein               | 63.48 | 308 | MV0_2110 | methyltransferase, putative, family  | 99.39 | 310 | BCG_3849c | hypothetical protein               | 63.48 | 308 | MAP2076c | hypothetical protein | 319  | 100   |
| MAP4_1749 | putative methyltransferase                                 | 212  | Rv3787c | Probable methyltransferase (methyl        | 35.54 | 243 | MV3774c | methyltransferase                  | 35.54 | 243 | MV0_2111 | methyltransferase, UbiE/COQ5 fam     | 99.06 | 212 | BCG_0418c | methyltransferase                  | 35.54 | 243 | MAP2075c | hypothetical protein | 212  | 100   |
| MAP4_1750 | hypothetical protein                                       | 237  | Rv0494  | Probable transcriptional regulatory       | 32.5  | 242 | MV2095  | Griff family transcriptional regul | 32.5  | 242 | MV0_2113 | hypothetical protein                 | 94.21 | 237 | BCG_0536c | Griff family transcriptional regul | 32.5  | 242 | MAP2074c | hypothetical protein | 237  | 100   |
| MAP4_1751 | hypothetical protein                                       | 137  | Rv1526c | Probable glycosyltransferase              | 29.55 | 426 | MV1535c | glycosyltransferase                | 29.55 | 426 | MV0_2114 | membrane associated protein          | 100   | 237 | BCG_1578c | glycosyltransferase                | 29.55 | 426 | MAP2073c | hypothetical protein | 137  | 100   |
| MAP4_1752 | hypothetical protein                                       | 285  | Rv248c  | Probable adenosylhomocysteine hy          | 25.89 | 495 | MV2156c | S-adenosyl-L-homocysteine H        | 25.89 | 495 | MV0_2115 | hypothetical protein                 | 98.21 | 283 | BCG_3277c | S-adenosyl-L-homocysteine hy       | 25.89 | 495 | MAP2072c | hypothetical protein | 285  | 100   |
| MAP4_1753 | AMP-binding protein                                        | 510  | Rv2050c | Probable fatty-acid-CoA ligase FadD       | 33.14 | 547 | MV2333c | AMP-binding protein                | 33.14 | 547 | MV0_2116 | AMP-binding enzyme, putative         | 99.22 | 510 | BCG_2525c | AMP-binding protein                | 33.14 | 547 | MAP2071c | hypothetical protein | 510  | 100   |
| MAP4_1754 | hypothetical protein                                       | 206  | Rv2926c | hypothetical protein                      | 34.69 | 214 | MV2926c | hypothetical protein               | 34.69 | 214 | MV0_2117 | hypothetical protein                 | 99.66 | 206 | BCG_1293c | hypothetical protein               | 34.69 | 214 | MAP2070c | hypothetical protein | 206  | 100   |

Table S1 continued

|           |                                                     |       |         |                                    |                                |       |         |                               |                                     |       |          |                                |                                  |       |           |                                |                                       |      |          |                      |     |     |
|-----------|-----------------------------------------------------|-------|---------|------------------------------------|--------------------------------|-------|---------|-------------------------------|-------------------------------------|-------|----------|--------------------------------|----------------------------------|-------|-----------|--------------------------------|---------------------------------------|------|----------|----------------------|-----|-----|
| MAP4_1805 | cutinase                                            | 252   | Rv1758  | MAP1788                            | cutinase                       | 55.73 | 218     | MAV_2169                      | serine esterase cutinase            | 99.6  | 252      | BCG_1798                       | cutinase cut1                    | 55.73 | 218       | MAP2020                        | hypothetical protein                  | 267  | 97.3     |                      |     |     |
| MAP4_1806 | hypothetical protein                                | 80    | Rv0773c | Probable bifunctional acylase GcA. | 42.86                          | 512   | MB0796c | bifunctional cephalosporin ac | 42.86                               | 512   | MAV_2170 | acyl carrier protein           | 100                              | 80    | BCG_0825c | bifunctional acylase gcA::cpe1 | 42.86                                 | 512  | MAP2019c | hypothetical protein | 80  | 100 |
| MAP4_1807 | glutathione monooxygenase                           | 495   | Rv1293c | Probable monooxygenase             | 41.88                          | 492   | MB0949c | monooxygenase                 | 41.88                               | 492   | MAV_2171 | independent oxidoreductase, ps | 89.38                            | 495   | BCG_0254c | lipoprotein lgpN               | 41.88                                 | 492  | MAP2018c | hypothetical protein | 100 | 100 |
| MAP4_1808 | lipoprotein lgpN                                    | 65.67 | Rv2270  | Probable lipoprotein lgpN          | 65.67                          | 175   | MB2293  | lipoprotein lgpN              | 64.93                               | 175   | MAV_2172 | LgpN protein                   | 94.34                            | 155   | BCG_2270c | lipoprotein lgpN               | 65.67                                 | 175  | MAP2017c | hypothetical protein | 158 | 100 |
| MAP4_1809 | hypothetical protein                                | 31.58 | 994     | MB2245c                            | bifunctional glutamine-synth   | 31.58 | 994     | MAV_2173                      | hypothetical protein                | 96.97 | 100      | BCG_2238c                      | bifunctional glutamine-synth     | 31.58 | 994       | MAP2016c                       | hypothetical protein                  | 170  | 99.41    |                      |     |     |
| MAP4_1810 | putative cytochrome P450 hydroxylase                | 83.29 | 428     | MB2299c                            | cytochrome P450 124 CYP124     | 83.29 | 428     | MAV_2174                      | P450 heme-thiolate protein          | 99.77 | 435      | BCG_2283c                      | cytochrome P450 124 CYP124       | 83.29 | 428       | MAP2015c                       | hypothetical protein                  | 1435 | 100      |                      |     |     |
| MAP4_1811 | hypothetical protein                                | 36.76 | 147     | MB0518                             | hypothetical protein           | 36.76 | 147     | MAV_2175                      | hypothetical protein                | 98.26 | 115      | BCG_0549                       | membrane protein mms52           | 36.76 | 147       | MAP2014c                       | hypothetical protein                  | 115  | 100      |                      |     |     |
| MAP4_1812 | hypothetical protein                                | 37.01 | 358     | MB0949c                            | hydroxylase                    | 37.01 | 358     | MAV_2176                      | hydroxylase                         | 99.72 | 365      | BCG_0978c                      | hypothetical protein             | 37.01 | 358       | MAP2013c                       | hypothetical protein                  | 381  | 100      |                      |     |     |
| MAP4_1813 | conserved hypothetical protein rich protein         | 55.53 | 595     | MB2287c                            | hypothetical protein           | 55.53 | 592     | MAV_2177                      | hypothetical protein                | 97.48 | 555      | BCG_2281c                      | hypothetical protein             | 55.53 | 592       | MAP2012c                       | hypothetical protein                  | 595  | 100      |                      |     |     |
| MAP4_1814 | hypothetical protein                                | 33.33 | 388     | MB1108                             | cystathionine gamma-synth      | 33.33 | 388     | MAV_2178                      | hypothetical protein                | 100   | 115      | BCG_1137                       | cystathionine gamma-synthase     | 33.33 | 388       | MAP2011c                       | hypothetical protein                  | 115  | 100      |                      |     |     |
| MAP4_1815 | SAM dependent carbonyl methyltransferase family pro | 35    | Rv3907c | Probable poly(A) polymerase PcnA ( | 34.35                          | 480   | MB3937c | poly(A) polymerase            | 34.35                               | 480   | MAV_2179 | hypothetical protein           | 99.15                            | 355   | BCG_3964c | poly(A) polymerase             | 34.35                                 | 480  | MAP2010c | hypothetical protein | 355 | 100 |
| MAP4_1816 | metallo-beta-lactamase superfamily protein          | 83.41 | 211     | MB2249                             | hypothetical protein           | 83.41 | 211     | MAV_2180                      | metallo-beta-lactamase              | 100   | 208      | BCG_2278                       | hypothetical protein             | 83.41 | 211       | MAP2009c                       | hypothetical protein                  | 207  | 100      |                      |     |     |
| MAP4_1817 | zinc-type alcohol dehydrogenase adhE2               | 88.92 | 361     | MB2259                             | zinc-dependent alcohol dehyd   | 88.92 | 361     | MAV_2181                      | zinc-binding dehydrogenase          | 96.39 | 363      | BCG_2277                       | zinc-dependent alcohol dehyd     | 88.92 | 361       | MAP2008                        | adhE2                                 | 361  | 100      |                      |     |     |
| MAP4_1818 | putative transcriptional regulatory protein         | 74.86 | 353     | MB2283                             | transcriptional regulator      | 74.86 | 353     | MAV_2182                      | transcriptional regulator           | 97.45 | 353      | BCG_2276c                      | transcriptional regulatory prot  | 74.86 | 353       | MAP2007c                       | hypothetical protein                  | 353  | 100      |                      |     |     |
| MAP4_1819 | putative beta-lactamase                             | 75.74 | 272     | MB2281c                            | hypothetical protein           | 75.74 | 272     | MAV_2183                      | beta-lactamase                      | 98.9  | 272      | BCG_2275c                      | hypothetical protein             | 75.74 | 272       | MAP2006c                       | hypothetical protein                  | 272  | 100      |                      |     |     |
| MAP4_1820 | diacylglycerol kinase-related protein               | 78.91 | 309     | MB2276                             | diacylglycerol kinase          | 78.91 | 309     | MAV_2184                      | diacylglycerol kinase               | 97.67 | 310      | BCG_2270                       | diacylglycerol kinase            | 78.91 | 309       | MAP2005c                       | hypothetical protein                  | 526  | 100      |                      |     |     |
| MAP4_1821 | flavoprotein                                        | 56.26 | 475     | MB2275                             | flavoprotein                   | 56.26 | 475     | MAV_2185                      | flavoprotein                        | 98.86 | 536      | BCG_2269                       | flavoprotein                     | 56.26 | 475       | MAP2004c                       | hypothetical protein                  | 526  | 100      |                      |     |     |
| MAP4_1822 | Transcriptional regulator, TetR family              | 72.92 | 189     | MB2274                             | Transcriptional regulator      | 72.92 | 189     | MAV_2186                      | TetR family transcriptional regulat | 98.45 | 193      | BCG_2268c                      | transcriptional regulatory prot  | 72.92 | 189       | MAP2003c                       | hypothetical protein                  | 230  | 100      |                      |     |     |
| MAP4_1823 | Glycerol-3-phosphate dehydrogenase                  | 82.14 | 516     | MB2273c                            | glycerol-3-phosphate dehydr    | 82.14 | 516     | MAV_2187                      | glycerol-3-phosphate dehydrogen     | 98.64 | 513      | BCG_2267c                      | glycerol-3-phosphate dehydro     | 82.14 | 516       | MAP2002c                       | hypothetical protein                  | 516  | 100      |                      |     |     |
| MAP4_1824 | FAD binding domain-containing protein               | 23.6  | 460     | MB1189                             | hypothetical protein           | 23.6  | 460     | MAV_2189                      | FAD binding domain-containing pro   | 98.22 | 506      | BCG_1790                       | hypothetical protein             | 23.6  | 460       | MAP2001c                       | hypothetical protein                  | 506  | 100      |                      |     |     |
| MAP4_1825 | acetylpropionyl CoA carboxylase beta subunit        | 95.77 | 473     | MB2271                             | acetyl-propionyl-CoA carbox    | 95.77 | 473     | MAV_2190                      | propionyl-CoA carboxylase beta ch   | 99.77 | 473      | BCG_2264                       | acetyl-propionyl CoA carboxyl    | 95.77 | 473       | MAP2000c                       | acCoA                                 | 473  | 100      |                      |     |     |
| MAP4_1826 | 3-oxoacyl-ACP synthase 2                            | 88.26 | 438     | MB2270                             | 3-oxoacyl-ACP synthase         | 88.26 | 438     | MAV_2191                      | 3-oxoacyl-ACP synthase              | 99.77 | 440      | BCG_2263                       | 3-oxoacyl-ACP synthase           | 88.26 | 438       | MAP1999                        | 3-oxoacyl-ACP synthase II             | 440  | 100      |                      |     |     |
| MAP4_1827 | 3-oxoacyl-ACP synthase 1                            | 91.11 | 416     | MB2269                             | 3-oxoacyl-ACP synthase         | 91.11 | 416     | MAV_2192                      | 3-oxoacyl-ACP synthase              | 99.76 | 416      | BCG_2262                       | 3-oxoacyl-ACP synthase           | 91.11 | 416       | MAP1998                        | 3-oxoacyl-ACP synthase II             | 416  | 99.76    |                      |     |     |
| MAP4_1828 | meromyosin-like extension acyl carrier protein      | 92.17 | 115     | MB2268                             | acyl carrier protein           | 92.17 | 115     | MAV_2193                      | acyl carrier protein                | 100   | 115      | BCG_2261                       | acyl carrier protein             | 92.17 | 115       | MAP1997                        | acyl carrier protein                  | 115  | 100      |                      |     |     |
| MAP4_1829 | malonyl CoA-acyl carrier protein                    | 85.76 | 302     | MB2267                             | acyl carrier protein           | 85.76 | 302     | MAV_2194                      | malonyl CoA-acyl carrier protein tr | 100   | 302      | BCG_2260                       | malonyl CoA-acyl carrier protein | 85.76 | 302       | MAP1996                        | acyl carrier protein                  | 302  | 100      |                      |     |     |
| MAP4_1830 | hypothetical protein                                | 88.89 | 414     | MB2266                             | hypothetical protein           | 88.89 | 414     | MAV_2195                      | hypothetical protein                | 99.77 | 414      | BCG_2259                       | hypothetical protein             | 88.89 | 414       | MAP1995                        | hypothetical protein                  | 441  | 99.77    |                      |     |     |
| MAP4_1831 | pyruvate dehydrogenase E1 component                 | 92.65 | 901     | MB2265                             | pyruvate dehydrogenase subu    | 92.65 | 901     | MAV_2196                      | pyruvate dehydrogenase subunit E    | 99.78 | 929      | BCG_2258                       | pyruvate dehydrogenase subu      | 92.65 | 901       | MAP1994                        | pyruvate dehydrogenase subunit E1     | 929  | 100      |                      |     |     |
| MAP4_1832 | hypothetical protein                                | 71.13 | 196     | MB2264                             | hypothetical protein           | 71.13 | 196     | MAV_2197                      | hypothetical protein                | 99.41 | 196      | BCG_2257                       | hypothetical protein             | 71.13 | 196       | MAP1993                        | hypothetical protein                  | 247  | 100      |                      |     |     |
| MAP4_1833 | hypothetical protein                                | 147   | 155     | MB2263c                            | hypothetical protein           | 147   | 155     | MAV_2198                      | hypothetical protein                | 90.41 | 159      | BCG_2256                       | hypothetical protein             | 147   | 155       | MAP1992                        | hypothetical protein                  | 147  | 100      |                      |     |     |
| MAP4_1834 | peroxiredoxin AhpE                                  | 87.58 | 153     | MB2262c                            | peroxiredoxin AhpE             | 87.58 | 153     | MAV_2199                      | ahly hydroperoxide reductase/Thi    | 99.35 | 153      | BCG_2255c                      | peroxiredoxin AhpE               | 87.58 | 153       | MAP1991c                       | AhpE                                  | 153  | 100      |                      |     |     |
| MAP4_1835 | Adenosylcobalamin amidohydrolyase family prot       | 41.46 | 351     | MB0849                             | hypothetical protein           | 41.46 | 351     | MAV_2200                      | adenosylcobalamin amidohydroly      | 95.82 | 363      | BCG_0879                       | adenosylcobalamin amidohydroly   | 41.46 | 351       | MAP1990                        | hypothetical protein                  | 266  | 100      |                      |     |     |
| MAP4_1836 | adenosyl-hydrolyase domain-containing protein       | 28.28 | 286     | MB1854c                            | haloalkane dehalogenase        | 28.28 | 286     | MAV_2202                      | adenosyl-hydrolyase                 | 98.66 | 272      | BCG_1868c                      | haloalkane dehalogenase          | 28.28 | 286       | MAP1989c                       | hypothetical protein                  | 401  | 99.73    |                      |     |     |
| MAP4_1837 | hypothetical protein                                | 49.26 | 295     | MB2261                             | hypothetical protein           | 49.26 | 295     | MAV_2203                      | hypothetical protein                | 98.83 | 342      | BCG_2254                       | hypothetical protein             | 49.26 | 295       | MAP1988                        | hypothetical protein                  | 271  | 100      |                      |     |     |
| MAP4_1838 | Protein cobalamin biosynthesis tra                  | 72.03 | 313     | MB2260c                            | cobalamin biosynthesis prot    | 72.03 | 313     | MAV_2204                      | hypothetical protein                | 98.31 | 314      | BCG_2253c                      | cobalamin biosynthesis prot      | 72.03 | 313       | MAP1987c                       | hypothetical protein                  | 313  | 100      |                      |     |     |
| MAP4_1839 | hypothetical protein                                | 74.28 | 271     | MB2259                             | transmembrane protein          | 74.28 | 271     | MAV_2204                      | hypothetical protein                | 98.91 | 276      | BCG_2252c                      | hypothetical protein             | 74.28 | 271       | MAP1986                        | hypothetical protein                  | 275  | 100      |                      |     |     |
| MAP4_1840 | phosphotyrosine protein phosphatase                 | 81.6  | 163     | MB2258                             | phosphotyrosine protein phos   | 81.6  | 163     | MAV_2206                      | low molecular weight protein-tyros  | 99.39 | 163      | BCG_2251                       | phosphotyrosine protein phos     | 81.6  | 163       | MAP1985                        | FtpA                                  | 163  | 100      |                      |     |     |
| MAP4_1841 | HAD superfamily hydrolase                           | 75.47 | 291     | MB2257                             | protein tyrosine kinase phosph | 75.47 | 291     | MAV_2207                      | hypothetical protein                | 98.2  | 222      | BCG_2250                       | hypothetical protein             | 75.47 | 291       | MAP1984                        | hypothetical protein                  | 222  | 100      |                      |     |     |
| MAP4_1842 | aminotransferase CsdB                               | 74.16 | 364     | MB2256                             | hypothetical protein           | 74.16 | 364     | MAV_2208                      | hypothetical protein                | 98.83 | 342      | BCG_2249c                      | hypothetical protein             | 74.16 | 364       | MAP1983                        | hypothetical protein                  | 356  | 100      |                      |     |     |
| MAP4_1843 | hypothetical protein                                | 80.59 | 379     | MB2255c                            | hypothetical protein           | 80.59 | 379     | MAV_2209                      | hypothetical protein                | 98.35 | 378      | BCG_2248                       | hypothetical protein             | 80.59 | 379       | MAP1982                        | hypothetical protein                  | 378  | 100      |                      |     |     |
| MAP4_1844 | hypothetical protein                                | 68.6  | 245     | MB2254c                            | hypothetical protein           | 68.6  | 245     | MAV_2210                      | hypothetical protein                | 97.96 | 245      | BCG_2247c                      | hypothetical protein             | 68.6  | 245       | MAP1981c                       | hypothetical protein                  | 245  | 100      |                      |     |     |
| MAP4_1845 | putative RNase H/acid phosphatase                   | 74.01 | 364     | MB2253c                            | bifunctional RNase H/acid ph   | 74.01 | 364     | MAV_2211                      | bifunctional RNase H/acid phosph    | 96.34 | 383      | BCG_2246c                      | bifunctional RNase H/acid phos   | 74.01 | 364       | MAP1980c                       | phosphatase/ RNase H/acid phosphatase | 377  | 100      |                      |     |     |
| MAP4_1846 | putative ferredoxin                                 | 35.59 | 63      | MB3533c                            | ferredoxin FdxD                | 35.59 | 63      | MAV_2219                      | hypothetical protein                | 48.39 | 64       | BCG_3567c                      | ferredoxin FdxD                  | 35.59 | 63        | MAP0560                        | FdxD                                  | 63   | 35.59    |                      |     |     |
| MAP4_1847 | cytochrome P450 superfamily protein                 | 37.87 | 393     | MB2252                             | cytochrome P450 143 CYP1       | 37.87 | 393     | MAV_2220                      | cytochrome P450 superfamily pr      | 99.71 | 399      | BCG_0778                       | cytochrome P450 143 cyg143       | 37.87 | 393       | MAP1979                        | hypothetical protein                  | 389  | 100      |                      |     |     |
| MAP4_1848 | transcriptional regulator, Cro/C family putative    | 44.17 | 263     | MB0963                             | Ac/F family transcriptional re | 44.17 | 263     | MAV_2214                      | regulatory protein                  | 99.47 | 189      | BCG_3896                       | Ac/F family transcriptional reg  | 44.17 | 263       | MAP1978                        | hypothetical protein                  | 189  | 100      |                      |     |     |
| MAP4_1849 | putative methyltransferase                          | 34.21 | 241     | MB0575c                            | benzoquinone methyltransfera   | 34.21 | 241     | MAV_2216                      | Cher methyltransferase SAM bindi    | 98.61 | 216      | BCG_0605c                      | benzoquinone methyltransferase   | 34.21 | 241       | MAP1977                        | hypothetical protein                  | 216  | 100      |                      |     |     |
| MAP4_1850 | hypothetical protein                                | 86.29 | 124     | MB2251                             | hypothetical protein           | 86.29 | 124     | MAV_2215                      | hypothetical protein                | 99.15 | 239      | BCG_2245                       | hypothetical protein             | 86.29 | 124       | MAP1976                        | hypothetical protein                  | 239  | 100      |                      |     |     |
| MAP4_1851 | hypothetical protein                                | 45.83 | 112     | MB2250                             | hypothetical protein           | 45.83 | 112     | MAV_2480                      | phospholipase, patatin family prot  | 40    | 318      | BCG_2353                       | hypothetical protein             | 45.83 | 112       | MAP1975                        | hypothetical protein                  | 112  | 100      |                      |     |     |
| MAP4_1852 | conserved hypothetical protein, CHAD domain cont    | 66.74 | 213     | MB2250                             | hypothetical protein           | 66.74 | 213     | MAV_2252                      | acyltransferase, putative           | 97.81 | 245      | BCG_2243                       | hypothetical protein             | 66.74 | 213       | MAP1974                        | hypothetical protein                  | 245  | 100      |                      |     |     |
| MAP4_1853 | hypothetical protein                                | 42.31 | 270     | MB2250                             | hypothetical protein           | 42.31 | 270     | MAV_2252                      | hypothetical protein                | 100   | 270      | BCG_2260c                      | hypothetical protein             | 42.31 | 270       | MAP1973                        | hypothetical protein                  | 150  | 100      |                      |     |     |
| MAP4_1854 | hypothetical protein                                | 38.95 | 136     | MB0209                             | hypothetical protein           | 38.95 | 136     | MAV_2237                      | hypothetical protein                | 98.37 | 134      | BCG_0240                       | hypothetical protein             | 38.95 | 136       | MAP1972                        | hypothetical protein                  | 133  | 100      |                      |     |     |
| MAP4_1855 | hypothetical protein                                | 73.23 | 379     | MB3123                             | hypothetical protein           | 73.23 | 379     | MAV_0332                      | hypothetical protein                | 71.88 | 377      | BCG_3211                       | hypothetical protein             | 73.23 | 379       | MAP1971                        | hypothetical protein                  | 381  | 100      |                      |     |     |
| MAP4_1856 | 3-methyl-2-oxobutanate dehydrogenase                | 88.07 | 281     | MB2250                             | 3-methyl-2-oxobutanate hyd     | 88.07 | 281     | MAV_2239                      | 3-methyl-2-oxobutanate dehydro      | 99.3  | 285      | BCG_2242                       | 3-methyl-2-oxobutanate hyd       | 88.07 | 281       | MAP1970                        | 3-methyl-2-oxobutanate dehydrogen     | 281  | 100      |                      |     |     |
| MAP4_1857 | nitroreductase, w/digitonin sulfolipin protein      | 57.64 | 500     | MB0791                             | hypothetical protein           | 57.64 | 500     | MAV_2240                      | hypothetical protein                | 97.41 | 466      | BCG_2241                       | hypothetical protein             | 57.64 | 500       | MAP1969                        | hypothetical protein                  | 466  | 100      |                      |     |     |
| MAP4_1858 | putative exported protease                          | 84.23 | 520     | MB2249c                            | exported protease              | 84.23 | 520     | MAV_2241                      | alpha/beta hydrolase                | 100   |          |                                |                                  |       |           |                                |                                       |      |          |                      |     |     |

Table S1 continued

|           |                                                          |       |         |                                                          |       |     |         |                                    |       |     |          |                                     |       |     |           |                                  |       |     |          |                                       |       |       |
|-----------|----------------------------------------------------------|-------|---------|----------------------------------------------------------|-------|-----|---------|------------------------------------|-------|-----|----------|-------------------------------------|-------|-----|-----------|----------------------------------|-------|-----|----------|---------------------------------------|-------|-------|
| MAP4_1946 | hypothetical protein                                     | 132   | Rv2186c | hypothetical protein                                     | 83.33 | 129 | Mb2208c | hypothetical protein               | 83.33 | 129 | MAV_2308 | hypothetical protein                | 99.24 | 234 | BCG_2201c | hypothetical protein             | 83.33 | 129 | MAP1924c | hypothetical protein                  | 142   | 100   |
| MAP4_1905 | hypothetical protein                                     | 145   | Rv2185c | Conserved protein TB16.3                                 | 75.69 | 144 | Mb2207c | hypothetical protein               | 75.69 | 144 | MAV_2309 | Cyclase/dehydrase                   | 99.31 | 134 | BCG_2200c | hypothetical protein             | 75.69 | 144 | MAP1922c | hypothetical protein                  | 142   | 100   |
| MAP4_1906 | Arabinosylating ATPase family protein                    | 383   | Rv2184c | hypothetical protein                                     | 60.73 | 379 | Mb2206c | hypothetical protein               | 60.73 | 379 | MAV_2307 | Arabinosylating ATPase              | 99.31 | 392 | BCG_2199c | hypothetical protein             | 60.73 | 379 | MAP1921c | hypothetical protein                  | 383   | 379   |
| MAP4_1907 | hypothetical protein                                     | 129   | Rv2183c | hypothetical protein                                     | 67.18 | 131 | Mb2205c | hypothetical protein               | 67.18 | 131 | MAV_2311 | hypothetical protein                | 98.45 | 129 | BCG_2198c | hypothetical protein             | 67.18 | 131 | MAP1920c | hypothetical protein                  | 129   | 100   |
| MAP4_1908 | 1-acylglycerol-3-phosphate O-acyltransferase             | 241   | Rv2182c | Alpha-1->2-mannosyltransferase                           | 83.4  | 247 | Mb2204c | 1-acylglycerol-3-phosphate O       | 83.4  | 247 | MAV_2310 | 1-acylglycerol-3-phosphate O-acyl   | 99.24 | 241 | BCG_2197c | 1-acylglycerol-3-phosphate O-    | 83.4  | 247 | MAP1919c | hypothetical protein                  | 241   | 100   |
| MAP4_1909 | hypothetical protein                                     | 429   | Rv2181c | Alpha-1->2-mannosyltransferase                           | 75.76 | 427 | Mb2203c | hypothetical protein               | 75.76 | 427 | MAV_2312 | hypothetical protein                | 99.74 | 390 | BCG_2196c | integral membrane protein        | 75.76 | 427 | MAP1919  | hypothetical protein                  | 429   | 100   |
| MAP4_1910 | hypothetical protein                                     | 429   | Rv2180c | Probable conserved integral membr                        | 76.39 | 295 | Mb2202c | hypothetical protein               | 76.04 | 295 | MAV_2314 | hypothetical protein                | 99.31 | 289 | BCG_2195c | integral membrane protein        | 76.04 | 295 | MAP1918c | hypothetical protein                  | 428   | 100   |
| MAP4_1911 | hypothetical protein                                     | 162   | Rv2179c | hypothetical protein                                     | 82.64 | 168 | Mb2201c | hypothetical protein               | 82.61 | 168 | MAV_2313 | hypothetical protein                | 99.31 | 162 | BCG_2194c | hypothetical protein             | 82.61 | 168 | MAP1917c | hypothetical protein                  | 162   | 100   |
| MAP4_1912 | 3-deoxy-D-arabino-heptulosonate 7-phosphate synthase     | 481   | Rv2178c | 3-deoxy-D-arabino-heptulosonate 7-                       | 93.51 | 467 | Mb2200c | 3-deoxy-D-arabino-heptulosonate sy | 93.59 | 467 | MAV_2317 | 3-deoxy-7-phosphoheptulosonate sy   | 100   | 481 | BCG_2193c | 3-deoxy-D-arabinoheptuloson      | 93.59 | 467 | MAP1916c | hypothetical protein                  | 481   | 100   |
| MAP4_1913 | hypothetical protein                                     | 347.5 | Rv2177c | Probable transmembrane serine/thr                        | 73.05 | 399 | Mb2199c | Ser/Thr protein kinase             | 73.05 | 399 | MAV_2318 | serine/threonine protein kinase     | 98.48 | 428 | BCG_2192c | transmembrane serine/threon      | 73.05 | 399 | MAP1914c | hypothetical protein                  | 347.5 | 100   |
| MAP4_1914 | transmembrane serine/threonine protein kinase LpkN       | 356   | Rv2176c | Conserved regulatory protein                             | 87.01 | 349 | Mb2198c | regulatory protein                 | 86.71 | 349 | MAV_2320 | hypothetical protein                | 99.2  | 125 | BCG_2190c | regulatory protein               | 86.71 | 349 | MAP1913c | hypothetical protein                  | 356   | 100   |
| MAP4_1915 | regulatory protein, probable DNA-binding protein         | 194   | Rv2175c | Alpha-1->9-mannosyltransferase Pgs                       | 60.48 | 516 | Mb2197c | hypothetical protein               | 60.68 | 516 | MAV_2321 | hypothetical membrane protein       | 99.8  | 505 | BCG_2189c | hypothetical protein             | 60.48 | 516 | MAP1912c | hypothetical protein                  | 305   | 100   |
| MAP4_1916 | hypothetical protein                                     | 348   | Rv2174c | Probable acetylesterase/ pyrophosp                       | 76.99 | 352 | Mb2196c | acetylesterase/ pyrophosphat       | 76.99 | 352 | MAV_2322 | hypothetical protein                | 99.74 | 349 | BCG_2188c | acetylesterase/ pyrophosphat     | 76.99 | 352 | MAP1911c | hypothetical protein                  | 348   | 100   |
| MAP4_1917 | Geranyltransferyl pyrophosphate synthetase               | 81.63 | Rv2173c | Probable conserved proline rich me                       | 71.81 | 384 | Mb2195c | hypothetical protein               | 71.43 | 384 | MAV_2329 | hypothetical protein                | 97.17 | 424 | BCG_2187c | hypothetical protein             | 71.81 | 384 | MAP1909c | hypothetical protein                  | 302   | 100   |
| MAP4_1918 | hypothetical protein                                     | 302   | Rv2172c | Probable conserved proline rich me                       | 71.81 | 384 | Mb2194c | hypothetical protein               | 71.43 | 384 | MAV_2329 | hypothetical protein                | 97.17 | 424 | BCG_2186c | hypothetical protein             | 71.81 | 384 | MAP1908c | hypothetical protein                  | 302   | 100   |
| MAP4_1919 | lipoprotein lppM                                         | 243   | Rv2171c | GCNS-related N-acetyltransferase                         | 80.1  | 206 | Mb2193c | hypothetical protein               | 80.1  | 206 | MAV_2324 | acetyltransferase, gnat family prot | 99    | 200 | BCG_2185c | lipoprotein lppM                 | 84    | 227 | MAP1909  | hypothetical protein                  | 243   | 100   |
| MAP4_1920 | hypothetical protein                                     | 200   | Rv2170c | GCNS-related N-acetyltransferase                         | 80.1  | 206 | Mb2192c | hypothetical protein               | 80.1  | 206 | MAV_2324 | acetyltransferase, gnat family prot | 99    | 200 | BCG_2184c | hypothetical protein             | 80.1  | 206 | MAP1908  | hypothetical protein                  | 200   | 100   |
| MAP4_1921 | hypothetical protein                                     | 133   | Rv2169c | Probable conserved transmembrane                         | 83.56 | 134 | Mb2191c | Transmembrane protein              | 83.58 | 134 | MAV_2325 | hypothetical protein                | 98.5  | 133 | BCG_2183c | hypothetical protein             | 83.56 | 134 | MAP1907c | hypothetical protein                  | 133   | 100   |
| MAP4_1922 | putative cell division protein MraZ                      | 143   | Rv2168c | hypothetical protein                                     | 94.41 | 143 | Mb2190c | cell division protein MraZ         | 94.41 | 143 | MAV_2327 | hypothetical protein                | 100   | 143 | BCG_2182c | cell division protein MraZ       | 94.41 | 143 | MAP1906c | cell division protein MraZ            | 143   | 100   |
| MAP4_1923 | 5-adenosyl-methyltransferase MraW                        | 335   | Rv2167c | Probable conserved proline rich me                       | 71.81 | 384 | Mb2188c | hypothetical protein               | 71.43 | 384 | MAV_2329 | hypothetical protein                | 97.17 | 424 | BCG_2181c | proline rich membrane prot       | 71.81 | 384 | MAP1904c | hypothetical protein                  | 425   | 99.76 |
| MAP4_1924 | conserved proline rich membrane protein                  | 424   | Rv2166c | Probable conserved proline rich me                       | 71.81 | 384 | Mb2187c | hypothetical protein               | 71.43 | 384 | MAV_2329 | hypothetical protein                | 97.17 | 424 | BCG_2180c | penicillin-binding membrane p    | 80.12 | 679 | MAP1903c | Pf6B                                  | 663   | 100   |
| MAP4_1925 | penicillin-binding protein pbpB                          | 623   | Rv2165c | Probable penicillin-binding membra                       | 80.12 | 679 | Mb2186c | penicillin-binding membrane        | 80.12 | 679 | MAV_2330 | penicillin binding protein transp   | 99.37 | 639 | BCG_2179c | penicillin-binding membrane p    | 80.12 | 679 | MAP1902c | Pf6B                                  | 623   | 100   |
| MAP4_1926 | UDP-N-acetylmuramoylalanine-D-glutamate-2, 6-diamino     | 520   | Rv2164c | Probable UDP-N-acetylmuramoylala                         | 79    | 535 | Mb2185c | UDP-N-acetylmuramoylalanine-D-gl   | 79    | 535 | MAV_2331 | UDP-N-acetylmuramoyl-tripeptid      | 99.44 | 520 | BCG_2178c | UDP-N-acetylmuramoylalanine      | 79    | 535 | MAP1902c | UDP-N-acetylmuramoylalanine-D-gluta   | 520   | 100   |
| MAP4_1927 | UDP-N-acetylmuramoylalanine-D-glutamate-2, 6-diamino     | 519   | Rv2163c | Probable UDP-N-acetylmuramoylala                         | 80.73 | 510 | Mb2184c | UDP-N-acetylmuramoyl-tripeptid     | 80.73 | 510 | MAV_2332 | UDP-N-acetylmuramoyl-tripeptid      | 99.44 | 520 | BCG_2177c | phospho-N-acetylmuramoyl-penta   | 80.73 | 510 | MAP1901c | UDP-N-acetylmuramoyl-pentapept        | 519   | 100   |
| MAP4_1928 | Phospho-N-acetylmuramoyl-pentapeptide-transferase        | 359   | Rv2162c | Probable UDP-N-acetylmuramoylala                         | 90.25 | 359 | Mb2183c | phospho-N-acetylmuramoyl-penta     | 90.25 | 359 | MAV_2333 | phospho-N-acetylmuramoyl-penta      | 99.42 | 359 | BCG_2176c | phospho-N-acetylmuramoyl-p       | 90.25 | 359 | MAP1900c | phospho-N-acetylmuramoyl-pentapept    | 359   | 100   |
| MAP4_1929 | UDP-N-acetylmuramoylalanine-D-glutamate ligase           | 489   | Rv2161c | Probable UDP-N-acetylmuramoylala                         | 79.87 | 486 | Mb2182c | UDP-N-acetylmuramoyl-L-alan        | 79.87 | 486 | MAV_2334 | UDP-N-acetylmuramoyl-L-alanyl-D     | 98.98 | 489 | BCG_2175c | UDP-N-acetylmuramoyl-L-alan      | 79.87 | 486 | MAP1899c | UDP-N-acetylmuramoyl-L-alanyl-D-gluta | 489   | 100   |
| MAP4_1930 | Cell division protein FtsW                               | 606   | Rv2160c | FSW-like protein FtsW                                    | 70.71 | 524 | Mb2181c | FSW-like protein FtsW              | 70.71 | 524 | MAV_2335 | cell division protein FtsW          | 96.89 | 610 | BCG_2174c | FSW-like protein FtsW            | 70.71 | 524 | MAP1898c | UDP-N-acetylmuramoyl-pentapept        | 606   | 100   |
| MAP4_1931 | UDP-glucosyltransferase-N-acetylmuramyl-pentapeptide     | 460   | Rv2159c | Probable UDP-glucosyltransferase                         | 78.25 | 410 | Mb2180c | UDP-glucosyltransferase-N-acetyl   | 78.25 | 410 | MAV_2336 | UDP-glucosyltransferase-N-acetyl    | 96.89 | 408 | BCG_2173c | UDP-glucosyltransferase-N-acetyl | 78.25 | 410 | MAP1897c | UDP-glucosyltransferase-N-acetyl      | 460   | 100   |
| MAP4_1932 | UDP-N-acetylmuramyl-L-alanine ligase                     | 494   | Rv2158c | Probable cell division protein FtsQ                      | 83.67 | 494 | Mb2179c | UDP-N-acetylmuramyl-L-alan         | 83.67 | 494 | MAV_2337 | UDP-N-acetylmuramyl-L-alanine       | 98.99 | 496 | BCG_2172c | UDP-N-acetylmuramyl-L-alan       | 83.67 | 494 | MAP1896c | UDP-N-acetylmuramyl-L-alanine ligase  | 494   | 100   |
| MAP4_1933 | Cell division protein FtsQ                               | 316   | Rv2157c | Possible cell division protein FtsQ                      | 76.18 | 314 | Mb2178c | cell division protein FtsQ-like    | 76.18 | 314 | MAV_2338 | cell division protein FtsQ-like     | 99.36 | 316 | BCG_2171c | cell division protein FtsQ       | 76.18 | 314 | MAP1927c | cell division protein FtsQ            | 270   | 30.16 |
| MAP4_1934 | Cell division protein FtsZ                               | 386   | Rv2156c | Cell division protein FtsZ                               | 95.34 | 379 | Mb2177c | cell division protein FtsZ         | 95.34 | 379 | MAV_2340 | cell division protein FtsZ          | 100   | 386 | BCG_2170c | cell division protein FtsZ       | 95.34 | 379 | MAP1894c | cell division protein FtsZ            | 386   | 100   |
| MAP4_1935 | multicopper oxidase family protein                       | 251   | Rv2155c | Conserved protein YJH                                    | 83.68 | 250 | Mb2176c | hypothetical protein               | 83.68 | 250 | MAV_2341 | hypothetical protein                | 98.3  | 235 | BCG_2169c | hypothetical protein             | 83.68 | 250 | MAP1893c | YJH                                   | 251   | 99.6  |
| MAP4_1936 | hypothetical protein                                     | 251   | Rv2154c | Conserved protein YJH                                    | 83.68 | 250 | Mb2175c | hypothetical protein               | 83.68 | 250 | MAV_2341 | hypothetical protein                | 98.3  | 235 | BCG_2168c | hypothetical protein             | 83.68 | 250 | MAP1892c | hypothetical protein                  | 264   | 100   |
| MAP4_1937 | hypothetical protein                                     | 214   | Rv2153c | hypothetical protein                                     | 72.25 | 208 | Mb2174c | hypothetical protein               | 72.25 | 208 | MAV_2342 | hypothetical protein                | 98.29 | 208 | BCG_2167c | hypothetical protein             | 72.25 | 208 | MAP1891c | hypothetical protein                  | 214   | 100   |
| MAP4_1938 | hypothetical protein                                     | 214   | Rv2152c | hypothetical protein                                     | 72.25 | 208 | Mb2173c | hypothetical protein               | 72.25 | 208 | MAV_2343 | hypothetical protein                | 98.29 | 208 | BCG_2166c | hypothetical protein             | 72.25 | 208 | MAP1890c | hypothetical protein                  | 214   | 100   |
| MAP4_1939 | hypothetical protein                                     | 96    | Rv2151c | Possible conserved transmembrane                         | 93.75 | 96  | Mb2170c | transmembrane protein              | 93.75 | 96  | MAV_2344 | transmembrane protein               | 97.92 | 115 | BCG_2165c | hypothetical protein             | 93.75 | 96  | MAP1889c | hypothetical protein                  | 96    | 100   |
| MAP4_1940 | Diviva family transmembrane protein Wag31                | 130   | Rv2150c | Diviva family transmembrane protein                      | 88.55 | 260 | Mb2169c | transmembrane protein              | 88.55 | 260 | MAV_2345 | Wag31 protein                       | 99.6  | 250 | BCG_2164c | hypothetical protein             | 88.55 | 260 | MAP1888c | Wag31                                 | 130   | 100   |
| MAP4_1941 | putative transmembrane protein                           | 236   | Rv2149c | Probable transmembrane protein                           | 69.23 | 218 | Mb2168c | transmembrane protein              | 69.23 | 218 | MAV_2346 | hypothetical protein                | 99.23 | 131 | BCG_2163c | hypothetical protein             | 69.23 | 218 | MAP1888c | hypothetical protein                  | 236   | 100   |
| MAP4_1942 | hypothetical protein                                     | 238   | Rv2148c | Probable transmembrane protein                           | 76.42 | 352 | Mb2167c | transmembrane protein              | 76.42 | 352 | MAV_2347 | phosphoglycoyltransferase           | 99.54 | 217 | BCG_2162c | hypothetical protein             | 76.42 | 352 | MAP1887c | hypothetical protein                  | 238   | 100   |
| MAP4_1943 | Putative penicillin-binding protein                      | 451   | Rv2147c | hypothetical protein                                     | 84.04 | 448 | Mb2166c | hypothetical protein               | 84.04 | 448 | MAV_2350 | hypothetical protein                | 100   | 451 | BCG_2161c | hypothetical protein             | 84.04 | 448 | MAP1886c | hypothetical protein                  | 451   | 100   |
| MAP4_1944 | Phospholipid-binding protein                             | 176   | Rv2146c | Conserved protein TB18.6                                 | 82.95 | 176 | Mb2164c | hypothetical protein               | 82.95 | 176 | MAV_2351 | hypothetical protein                | 100   | 176 | BCG_2160c | hypothetical protein             | 82.95 | 176 | MAP1885c | hypothetical protein                  | 176   | 100   |
| MAP4_1945 | REP132 repeat protein                                    | 480   | Rv2145c | hypothetical protein                                     | 69.96 | 451 | Mb2163c | hypothetical protein               | 69.96 | 451 | MAV_2352 | hypothetical protein                | 97.98 | 468 | BCG_2159c | hypothetical protein             | 69.96 | 451 | MAP1884c | hypothetical protein                  | 480   | 100   |
| MAP4_1946 | dihydroorotate dehydrogenase pyrD                        | 378   | Rv2139c | Probable dihydroorotate dehydrog                         | 81.36 | 357 | Mb2159c | dihydroorotate dehydrogenase       | 81.36 | 357 | MAV_2353 | dihydroorotate dehydrogenase 2      | 98.02 | 353 | BCG_2158c | dihydroorotate dehydrogenase     | 81.07 | 357 | MAP1883c | dihydroorotate dehydrogenase 2        | 378   | 100   |
| MAP4_1947 | hypothetical protein                                     | 402   | Rv2138c | Probable transcriptional regulator                       | 40.63 | 289 | Mb2158c | transcriptional regulator          | 40.63 | 289 | MAV_2354 | hypothetical protein                | 100   | 408 | BCG_2157c | transcriptional regulator prot   | 40.63 | 289 | MAP1882c | hypothetical protein                  | 402   | 100   |
| MAP4_1948 | conserved lipoprotein LppL                               | 375   | Rv2137c | Probable conserved lipoprotein LppL                      | 71.07 | 358 | Mb2162c | lipoprotein LppL                   | 70.25 | 358 | MAV_2355 | hypothetical protein                | 97.05 | 339 | BCG_2156c | lipoprotein LppL                 | 71.07 | 358 | MAP1881c | hypothetical protein                  | 375   | 100   |
| MAP4_1949 | hypothetical protein                                     | 100   | Rv2136c | hypothetical protein                                     | 86.27 | 137 | Mb2161c | hypothetical protein               | 86.27 | 137 | MAV_2356 | hypothetical protein                | 100   | 100 | BCG_2155c | hypothetical protein             | 86.27 | 137 | MAP1880c | hypothetical protein                  | 100   | 27.91 |
| MAP4_1950 | putative phosphotransferase, histidine phosphatase super | 264   | Rv2135c | putative phosphotransferase, histidine phosphatase super | 70.08 | 236 | Mb2155c | hypothetical protein               | 70.08 | 2   |          |                                     |       |     |           |                                  |       |     |          |                                       |       |       |

## Table S1 continued

|           |                                                          |       |         |                                             |       |      |         |                                    |       |      |          |                                     |       |      |           |                                     |       |      |          |                                |      |     |
|-----------|----------------------------------------------------------|-------|---------|---------------------------------------------|-------|------|---------|------------------------------------|-------|------|----------|-------------------------------------|-------|------|-----------|-------------------------------------|-------|------|----------|--------------------------------|------|-----|
| MAP4_2005 | dipeptidase                                              | 170   | Rv2089c | Dipeptidase PeptE                           | 83.69 | 375  | Mb1211c | dipeptidase PeptE                  | 83.69 | 375  | MbV_2414 | proline dipeptidase                 | 97.87 | 375  | BCG_2109c | dipeptidase PeptE                   | 83.69 | 375  | MAP1823c | hypothetical protein           | 1075 | 100 |
| MAP4_2006 | hypothetical protein                                     | 3025  | Mb3933c | Hypothetical alanine and proline kin        | 47.53 | 846  | Mb3933c | hypothetical protein               | 47.53 | 846  | MbV_2415 | hypothetical protein                | 77.34 | 996  | BCG_3960c | hypothetical protein                | 47.53 | 846  | MAP1822c | hypothetical protein           | 3020 | 100 |
| MAP4_2007 | hypothetical protein                                     | 178   | Rv2926c | hypothetical protein                        | 38.86 | 175  | Mb3933c | hypothetical protein               | 38.86 | 175  | MbV_2416 | hypothetical protein                | 98.26 | 175  | BCG_2959c | hypothetical protein                | 38.86 | 175  | MAP1821c | hypothetical protein           | 1078 | 100 |
| MAP4_2008 | hypothetical protein                                     | 145   | Rv2074  | Possible pyruvate kinase 5-phosphat         | 58.33 | 137  | Mb3015  | hypothetical protein               | 58.33 | 137  | MbV_2422 | lysyl/cystinyl hydrolase and ap     | 90.37 | 136  | BCG_3012  | hypothetical protein                | 58.33 | 137  | MAP1820c | hypothetical protein           | 1412 | 100 |
| MAP4_2011 | precorrin-6y methyltransferase cobL                      | 387   | Rv2072c | Precorrin-6y (C15,15)-methyltransf          | 71.28 | 390  | Mb2098c | precorrin-6y methyltransfer        | 71.28 | 390  | MbV_2424 | precorrin-6y (C15,15)-methyltransf  | 95.37 | 389  | BCG_2091c | precorrin-6y methyltransferase      | 71.28 | 390  | MAP1817c | CobL                           | 389  | 100 |
| MAP4_2012 | precorrin-4 (C11)-methyltransferase                      | 251   | Rv2071c | Precorrin-4 (C11)-methyltransf              | 83.27 | 251  | Mb2099c | precorrin-4 (C11)-methyltra        | 83.27 | 251  | MbV_2425 | precorrin-4 (C11)-methyltransfer    | 97.21 | 251  | BCG_2090c | precorrin-4 (C11)-methyltransf      | 83.27 | 251  | MAP1816c | hypothetical protein           | 251  | 100 |
| MAP4_2013 | Cobalt-precorrin-6x reductase                            | 244   | Rv2070c | Precorrin-6x reductase CobK                 | 76.57 | 244  | Mb2096c | cobalt-precorrin-6x reductas       | 76.57 | 244  | MbV_2427 | cobalt-precorrin-6x reductase       | 97.95 | 244  | BCG_2089c | cobalt-precorrin-6x reductase       | 76.57 | 244  | MAP1815c | cobalt-precorrin-6x reductase  | 244  | 100 |
| MAP4_2014 | RNA polymerase sigma factor, ECF subfamily               | 439   | Rv2069  | RNA polymerase sigma factor, ECF s          | 84.44 | 185  | Mb2095  | RNA polymerase sigma factor        | 84.44 | 185  | MbV_2426 | RNA polymerase sigma factor SigC    | 99    | 401  | BCG_2088c | RNA polymerase sigma factor         | 84.44 | 185  | MAP1814c | hypothetical protein           | 439  | 100 |
| MAP4_2015 | PP2A family protein PPE2                                 | 456   | Rv2056c | PP2A family protein PPE2                    | 65.45 | 558  | Mb2092c | PP2A family protein PPE2           | 65.45 | 558  | MbV_2429 | PP2A family protein                 | 98    | 556  | BCG_0294c | PP2A family protein                 | 65.45 | 556  | MAP1813c | hypothetical protein           | 550  | 100 |
| MAP4_2016 | bifunctional cobL-cobU fusion protein                    | 499   | Rv2066  | Probable bifunctional protein, CobL-        | 86.56 | 508  | Mb2091c | cobalamin biosynthesis protein cob | 86.56 | 508  | MbV_2430 | cobalamin biosynthesis protein cob  | 98.59 | 496  | BCG_0285c | bifunctional protein, CobL-CobU     | 86.56 | 508  | MAP1811c | CobL                           | 496  | 100 |
| MAP4_2017 | precorrin-8X methyltransferase CobL                      | 308   | Rv2065  | Precorrin-8X methyltransferase CobL         | 87.5  | 208  | Mb2090c | precorrin-8X methyltransfer        | 87.5  | 208  | MbV_2431 | precorrin-8X methyltransferase      | 98.27 | 173  | BCG_2084c | precorrin-8X methyltransferase      | 87.5  | 208  | MAP1810c | precorrin-8X methyltransferase | 308  | 100 |
| MAP4_2018 | Cobalamin biosynthesis protein CobG                      | 366   | Rv2064  | Precorrin-3B synthase CobG                  | 74.32 | 363  | Mb2090c | cobalamin biosynthesis protein     | 74.32 | 363  | MbV_2431 | precorrin-3B synthase CobG          | 23.19 | 569  | BCG_2083c | cobalamin biosynthesis protein      | 74.32 | 363  | MAP1811c | CobG                           | 366  | 100 |
| MAP4_2019 | aliphatic sulfonates transmembrane ABC transporter p     | 275   | Rv2835c | Probable beta/serine/thi                    | 28.21 | 303  | Mb3273c | glycine betaine/serine/thio        | 38.5  | 239  | MbV_2442 | aliphatic sulfonates ABC transport  | 99.64 | 275  | BCG_3815c | omoproteo-actin (glycine betain     | 30.5  | 239  | MAP1809c | hypothetical protein           | 275  | 100 |
| MAP4_2020 | aliphatic sulfonates transmembrane ABC transporter p     | 335   | Rv2837c | Sulfate-transport ATP-binding pro           | 41.09 | 351  | Mb2419c | sulfate-transport ABC transpo      | 41.09 | 351  | MbV_2434 | sulfate-transport ABC transpo       | 100   | 251  | BCG_2412c | sulfate-transport ATP-binding       | 41.09 | 351  | MAP1808c | hypothetical protein           | 335  | 100 |
| MAP4_2021 | ABC transporter, substrate-binding protein, aliphatic su | 376   | Rv2836c | Probable ABC transporter, substrate-binding | 38.04 | 328  | Mb0419c | glutamine-binding lipoprote        | 38.04 | 328  | MbV_2435 | sulfonate-binding protein           | 99.4  | 326  | BCG_0450c | glutamine-binding lipoprote         | 38.04 | 328  | MAP1807c | hypothetical protein           | 376  | 100 |
| MAP4_2022 | hypothetical protein                                     | 238   | Rv2284  | Probable esterase LipM                      | 37.84 | 431  | Mb2305c | esterase                           | 37.84 | 431  | MbV_2436 | hypothetical protein                | 98.24 | 227  | BCG_2299  | esterase LipM                       | 37.84 | 431  | MAP1806c | hypothetical protein           | 238  | 100 |
| MAP4_2023 | cobaltochelatase subunit CobN                            | 1191  | Rv2062c | Cobalamin biosynthesis protein Cob          | 89.61 | 1194 | Mb2088c | cobaltochelatase subunit Cob       | 89.61 | 1194 | MbV_2437 | cobaltochelatase subunit CobN       | 98.99 | 1197 | BCG_2081c | cobaltochelatase subunit CobN       | 89.61 | 1194 | MAP1805c | cobaltochelatase subunit CobN  | 1191 | 100 |
| MAP4_2024 | hypothetical protein                                     | 126   | Rv2061c | hypothetical protein                        | 79.84 | 134  | Mb2087c | hypothetical protein               | 79.84 | 134  | MbV_2442 | hydroximease 5-phosphate oxid       | 100   | 102  | BCG_2080c | hypothetical protein                | 79.84 | 134  | MAP1804c | hypothetical protein           | 126  | 100 |
| MAP4_2025 | Dienelactone hydrolase family protein                    | 171   | Rv2054  | hypothetical protein                        | 75.76 | 237  | Mb2080c | hypothetical protein               | 75.76 | 237  | MbV_2443 | lysine hydrolase                    | 98.52 | 203  | BCG_2073c | hypothetical protein                | 75.76 | 237  | MAP1803c | hypothetical protein           | 171  | 100 |
| MAP4_2026 | putative transmembrane protein                           | 126   | Rv2053c | Probable transmembrane protein Fx           | 52.94 | 175  | Mb2079c | FxA protein                        | 52.94 | 175  | MbV_2444 | FxA                                 | 95.32 | 171  | BCG_2072c | FxA protein                         | 52.94 | 175  | MAP1802c | FxA                            | 171  | 100 |
| MAP4_2027 | Amidohydroxylase family protein                          | 538   | Rv2052c | Amidohydroxylase family protein             | 78.11 | 534  | Mb2078c | hypothetical protein               | 78.11 | 534  | MbV_2445 | amidohydroxylase                    | 98.51 | 538  | BCG_2071c | hypothetical protein                | 78.11 | 534  | MAP1801c | hypothetical protein           | 538  | 100 |
| MAP4_2028 | Apollipoprotein N-acyltransferase                        | 627   | Rv2051c | Polyrenol-monoophosphomann                  | 69.19 | 874  | Mb2077c | polyrenol-monoophosphom            | 69.19 | 874  | MbV_0791 | hypothetical protein                | 28.57 | 565  | BCG_2070c | polyrenol-monoophosphom             | 69.19 | 874  | MAP1800c | hypothetical protein           | 627  | 100 |
| MAP4_2029 | putative glyoxyl transferase                             | 267   | Rv2051c | Polyrenol-monoophosphomann                  | 66.26 | 874  | Mb2077c | hypothetical protein               | 66.26 | 874  | MbV_4605 | glyoxyltransferase                  | 33.18 | 220  | BCG_2070c | polyrenol-monoophosphom             | 66.26 | 874  | MAP1799c | hypothetical protein           | 267  | 100 |
| MAP4_2030 | hypothetical protein                                     | 111   | Rv2050  | hypothetical protein                        | 97.3  | 111  | Mb2076c | hypothetical protein               | 97.3  | 111  | MbV_2447 | hypothetical protein                | 98.98 | 98   | BCG_2069  | hypothetical protein                | 97.3  | 111  | MAP1798c | hypothetical protein           | 111  | 100 |
| MAP4_2031 | hypothetical protein                                     | 116   | Rv2049c | hypothetical protein                        | 79.17 | 74   | Mb2075c | hypothetical protein               | 79.17 | 74   | MbV_2448 | hypothetical protein                | 100   | 95   | BCG_2068c | hypothetical protein                | 79.17 | 74   | MAP1797c | hypothetical protein           | 116  | 100 |
| MAP4_2032 | Polyketide synthase                                      | 4170  | Rv2048c | Polyketide synthase Pks12                   | 80.42 | 4151 | Mb2074c | polyketide synthase                | 80.42 | 4151 | MbV_2450 | erythronolide synthase, modules 3   | 98.88 | 4171 | BCG_2067c | polyketide synthase                 | 80.23 | 4151 | MAP1796c | hypothetical protein           | 4170 | 100 |
| MAP4_2033 | hypothetical protein                                     | 868   | Rv2047c | hypothetical protein                        | 74.17 | 854  | Mb2073c | hypothetical protein               | 74.17 | 854  | MbV_2451 | hypothetical protein                | 98.83 | 868  | BCG_2066c | hypothetical protein                | 74.17 | 854  | MAP1795c | hypothetical protein           | 868  | 100 |
| MAP4_2034 | hypothetical protein                                     | 144   | Rv2038  | Probable dehydrogenase Possible 2,          | 29.79 | 286  | Mb2072c | dehydrogenase                      | 29.79 | 286  | MbV_2452 | dehydrogenase                       | 29.79 | 286  | BCG_2065c | dehydrogenase                       | 29.79 | 286  | MAP1794c | hypothetical protein           | 144  | 100 |
| MAP4_2035 | transposase 1900                                         | 434   | Rv2037  | Putative transposase for insertion s        | 28.55 | 363  | Mb3160  | transposase                        | 28.55 | 363  | MbV_1059 | hypothetical protein                | 29.01 | 350  | BCG_3397  | transposase fusion protein          | 28.55 | 363  | MAP0034c | hypothetical protein           | 406  | 100 |
| MAP4_2036 | hypothetical protein                                     | 238   | Rv2036c | Probable conserved transmembran             | 29.27 | 256  | Mb0093c | hypothetical protein               | 29.27 | 256  | MbV_2458 | hypothetical protein                | 72.37 | 235  | BCG_0123  | hypothetical protein                | 29.27 | 256  | MAP1792  | hypothetical protein           | 180  | 100 |
| MAP4_2037 | hypothetical protein                                     | 42    | Rv0996  | Probable conserved transmembran             | 34.21 | 358  | Mb0123c | transmembrane protein              | 34.21 | 358  | MbV_2454 | hypothetical protein                | 97.62 | 42   | BCG_1051  | hypothetical protein                | 34.21 | 358  | MAP4173  | hypothetical protein           | 313  | 50  |
| MAP4_2038 | nitric oxide reductase Q protein NorQ                    | 264   | Rv0370c | Possible oxidoreductase                     | 21.34 | 298  | Mb1027c | oxidoreductase                     | 21.34 | 298  | MbV_2455 | ChbQ/NorQ/NorQ/GwpN family pro      | 99.24 | 264  | BCG_0408c | oxidoreductase                      | 21.34 | 298  | MAP1791  | NorQ                           | 264  | 100 |
| MAP4_2039 | hypothetical protein                                     | 46    | Rv0896c | Possible UDP-glucose-4-epimerase C          | 29.65 | 532  | Mb0052c | UDP-glucose-4-epimerase Cp         | 29.65 | 532  | MbV_2456 | hypothetical protein                | 99.24 | 264  | BCG_0408c | UDP-glucose-4-epimerase csp         | 29.65 | 532  | MAP1790c | MorQ                           | 512  | 100 |
| MAP4_2040 | hypothetical protein                                     | 192   | Rv0481c | hypothetical protein                        | 27.87 | 174  | Mb0491c | hypothetical protein               | 27.87 | 174  | MbV_2457 | hypothetical protein                | 99.15 | 235  | BCG_0522c | hypothetical protein                | 27.87 | 174  | MAP1789c | hypothetical protein           | 192  | 100 |
| MAP4_2041 | Transcriptional regulator, TetR family                   | 519   | Rv3574  | Transcriptional regulatory pro              | 35.38 | 199  | Mb3005  | transcriptional regulatory pro     | 35.38 | 199  | MbV_2459 | TetR family transcriptional regulat | 99.49 | 197  | BCG_3639  | TetR family transcriptional regulat | 35.38 | 199  | MAP1788c | hypothetical protein           | 519  | 100 |
| MAP4_2042 | hypothetical protein                                     | 360   | Rv0926c | hypothetical protein                        | 41.33 | 358  | Mb0942c | hypothetical protein               | 41.33 | 358  | MbV_2461 | hypothetical protein                | 99.44 | 360  | BCG_0978c | hypothetical protein                | 41.33 | 358  | MAP1786c | hypothetical protein           | 360  | 100 |
| MAP4_2043 | transposase, 1900                                        | 406   | Rv0797  | Putative transposase for insertion s        | 28.61 | 364  | Mb3360  | transposase                        | 28.61 | 364  | MbV_1059 | transposase                         | 29.01 | 350  | BCG_3397  | transposase fusion protein          | 28.61 | 364  | MAP0034c | hypothetical protein           | 406  | 100 |
| MAP4_2044 | hypothetical protein                                     | 202   | Rv2048c | hypothetical protein                        | 22.22 | 371  | Mb2077c | hypothetical protein               | 22.22 | 371  | MbV_2462 | hypothetical protein                | 99.43 | 202  | BCG_1106c | hypothetical protein                | 20.2  | 371  | MAP1785c | hypothetical protein           | 202  | 100 |
| MAP4_2047 | Transcriptional regulator, TetR family                   | 209   | Rv3055  | Possible transcriptional regulat            | 28.64 | 209  | Mb3801c | TetR family transcriptional regul  | 28.64 | 209  | MbV_2463 | TetR family transcriptional regulat | 99.52 | 209  | BCG_2063  | TetR family transcriptional regul   | 28.64 | 209  | MAP1783c | hypothetical protein           | 209  | 100 |
| MAP4_2048 | putative cytochrome P450 hydroxylase                     | 407   | Rv3121  | Probable cytochrome P450 141 Cyp            | 61.27 | 401  | Mb0001  | cytochrome P450 126                | 61.27 | 401  | MbV_2464 | cytochrome P450 family protein      | 98.45 | 407  | BCG_2283  | cytochrome P450 124 CYP124          | 30.98 | 428  | MAP1782c | hypothetical protein           | 412  | 100 |
| MAP4_2049 | putative lipoprotein lppI                                | 226   | Rv2046  | Probable lipoprotein lppI                   | 61.06 | 218  | Mb2072c | lipoprotein lppI                   | 61.06 | 218  | MbV_2465 | LppI protein                        | 99.1  | 221  | BCG_2065  | lipoprotein lppI                    | 61.06 | 218  | MAP1781  | hypothetical protein           | 226  | 100 |
| MAP4_2050 | carboxylesterase LipT                                    | 83.93 | Rv2045c | Carboxylesterase LipT                       | 83.93 | 511  | Mb2071c | carboxylesterase LipT              | 83.93 | 511  | MbV_2466 | LipT protein                        | 99.41 | 505  | BCG_2064c | carboxylesterase LipT               | 83.93 | 511  | MAP1780c | hypothetical protein           | 516  | 100 |
| MAP4_2051 | hypothetical protein                                     | 160   | Rv3016c | Possible acyl-CoA dehydrogenase Fa          | 33.33 | 251  | Mb2187c | acyl-CoA dehydrogenase             | 33.33 | 251  | MbV_2467 | dehydrogenase enzyme family         | 99.4  | 665  | BCG_2029c | acyl-CoA dehydrogenase FadE         | 33.33 | 251  | MAP1779c | hypothetical protein           | 160  | 100 |
| MAP4_2052 | putative thiolase kinase                                 | 129   | Rv2857c | ATP-dependent ClP protein                   | 42.25 | 426  | Mb2424c | ATP-dependent protein              | 42.25 | 426  | MbV_2468 | thiolase kinase                     | 100   | 164  | BCG_2475c | ATP-dependent protein               | 39.39 | 429  | MAP1778c | hypothetical protein           | 129  | 100 |
| MAP4_2053 | hypothetical protein                                     | 169   | Rv0367c | hypothetical protein                        | 82.54 | 129  | Mb0374c | hypothetical protein               | 82.54 | 129  | MbV_2469 | hypothetical protein                | 98.45 | 140  | BCG_0405c | hypothetical protein                | 82.54 | 129  | MAP1777c | hypothetical protein           | 169  | 100 |
| MAP4_2054 | hypothetical protein                                     | 126   | Rv2056c | hypothetical protein                        | 76.84 | 197  | Mb2073c | hypothetical protein               | 76.84 | 197  | MbV_2470 | hypothetical protein                | 100   | 192  | BCG_0404c | hypothetical protein                | 76.84 | 197  | MAP1776c | hypothetical protein           | 192  | 100 |
| MAP4_2055 | hypothetical protein                                     | 355   | Rv2145c | Diviva family protein Wag31                 | 35.59 | 260  | Mb2169c | hypothetical protein               | 35.59 | 260  | MbV_2471 | DoxK subfamily protein, putative    | 99.42 | 343  | BCG_2162c | hypothetical protein                | 35.59 | 260  | MAP1775c | hypothetical protein           | 355  | 1   |

Table S1 continued

|           |                                                            |      |         |                                         |       |      |         |                                       |       |      |         |                                       |       |      |          |                                    |      |       |
|-----------|------------------------------------------------------------|------|---------|-----------------------------------------|-------|------|---------|---------------------------------------|-------|------|---------|---------------------------------------|-------|------|----------|------------------------------------|------|-------|
| MAP4_2106 | putative NADPH oxidoreductase coenzyme F420-depend         | 421  | Rv0686  | Probable NADPH:adrenoxin oxidoreductase | 31.03 | 575  | Mb0910  | NADPH:adrenoxin oxidoreductase        | 31.03 | 575  | Mb0910  | NADPH:adrenoxin oxidoreductase        | 31.03 | 575  | MAP1723  | hypothetical protein               | 421  | 100   |
| MAP4_2109 | transposase, IS900                                         | 206  | Rv0797  | Putative transposase for insertion site | 28.61 | 364  | Mb0360  | Transposase                           | 28.55 | 370  | Mb0360  | Transposase                           | 28.55 | 370  | MAP0394  | hypothetical protein               | 206  | 100   |
| MAP4_2110 | Transcriptional regulator, TetR family                     | 223  | Rv2230  | Probable transcriptional regulator      | 29.13 | 278  | Mb0333  | TetR family transcriptional regulator | 29.13 | 278  | Mb0333  | TetR family transcriptional regulator | 29.13 | 278  | MAP1712  | hypothetical protein               | 223  | 100   |
| MAP4_2111 | hypothetical protein                                       | 279  | Rv1825  | PPE family protein PPE57                | 51.87 | 295  | Mb1363a | ATPase GLE                            | 40.91 | 684  | Mb1363a | ATPase GLE                            | 40.91 | 684  | MAP2433  | hypothetical protein               | 279  | 100   |
| MAP4_2112 | hypothetical protein                                       | 307  | Rv3784  | Possible dTDP-glucose 4,6-dehydratase   | 43.59 | 326  | Mb0813  | TDP-glucose 4,6-dehydratase           | 43.59 | 326  | Mb0813  | TDP-glucose 4,6-dehydratase           | 43.59 | 326  | MAP2399  | hypothetical protein               | 307  | 99.91 |
| MAP4_2113 | Transcriptional regulator, TetR family                     | 204  | Rv0667a | Possible transcriptional regulatory p   | 30.99 | 189  | Mb0608c | TetR family transcriptional regulat   | 30.99 | 189  | Mb0608c | TetR family transcriptional regulat   | 30.99 | 189  | MAP1716c | hypothetical protein               | 204  | 100   |
| MAP4_2114 | hypothetical protein                                       | 151  | Rv1926c | Immunogenic protein Mpt63 (antigen      | 29.07 | 159  | Mb1961c | hypothetical protein                  | 29.07 | 159  | Mb1961c | hypothetical protein                  | 29.07 | 159  | MAP1716  | hypothetical protein               | 151  | 100   |
| MAP4_2115 | hypothetical protein                                       | 204  | Rv2721c | Conserved transmembrane                 | 30.25 | 699  | Mb1749c | hypothetical protein                  | 30.25 | 699  | Mb1749c | hypothetical protein                  | 30.25 | 699  | MAP1716  | hypothetical protein               | 204  | 100   |
| MAP4_2116 | short-chain dehydrogenase                                  | 279  | Rv1865c | Probable short-chain type dehydrog      | 51.87 | 295  | Mb1363c | short chain dehydrogenase             | 51.87 | 295  | Mb1363c | short chain dehydrogenase             | 51.87 | 295  | MAP1716  | short chain dehydrogenase          | 279  | 100   |
| MAP4_2117 | fatty acid oxidation protein FadB                          | 710  | Rv0680  | Probable fatty oxidation protein Fad    | 63.41 | 720  | Mb0863  | fatty oxidation protein FadB          | 63.41 | 720  | Mb0863  | fatty oxidation protein FadB          | 63.41 | 720  | MAP1715  | FadB_2                             | 710  | 99.86 |
| MAP4_2118 | acyl-CoA thioase FadA                                      | 403  | Rv0659  | Possible acyl-CoA thioase FadA          | 73.82 | 403  | Mb0682  | acetyl-CoA acetyltransferase          | 74.06 | 403  | Mb0682  | acetyl-CoA acetyltransferase          | 74.06 | 403  | MAP1714  | acyl-CoA acetyltransferase         | 403  | 100   |
| MAP4_2119 | acyl-CoA dehydrogenase                                     | 387  | Rv2724c | Possible acyl-CoA dehydrogenase         | 50.67 | 386  | Mb2743c | acyl-CoA dehydrogenase                | 50.4  | 386  | Mb2743c | acyl-CoA dehydrogenase                | 50.67 | 386  | MAP1713  | FadE2_1                            | 387  | 100   |
| MAP4_2120 | CoA-transferase family III protein                         | 297  | Rv0655  | Probable fatty-acyl-CoA reductase       | 33.07 | 359  | Mb0678  | fatty-acyl-CoA reductase              | 33.07 | 359  | Mb0678  | fatty-acyl-CoA reductase              | 33.07 | 359  | MAP1712  | hypothetical protein               | 297  | 100   |
| MAP4_2121 | Transcriptional regulator, TetR family                     | 195  | Rv119c  | Possible transcriptional regulator      | 50    | 212  | Mb1251c | Transcriptional regulator             | 50    | 212  | Mb1251c | Transcriptional regulator             | 50    | 212  | MAP1711c | hypothetical protein               | 195  | 100   |
| MAP4_2122 | putative hydrolase                                         | 294  | Rv3171c | Probable non-heme haloperoxidase        | 37.63 | 299  | Mb3196c | non-Heme haloperoxidase Hx            | 37.63 | 299  | Mb3196c | non-Heme haloperoxidase Hx            | 37.63 | 299  | MAP1710  | hypothetical protein               | 294  | 100   |
| MAP4_2123 | fatty-acyl-CoA ligase                                      | 606  | Rv1550  | Probable fatty-acyl-CoA ligase FadD11   | 53.1  | 571  | Mb1056  | fatty-acyl-CoA ligase                 | 52.97 | 647  | Mb1056  | fatty-acyl-CoA ligase                 | 53.05 | 606  | MAP1709c | FadD11_2                           | 606  | 100   |
| MAP4_2124 | hypothetical protein                                       | 217  | Rv3835  | hypothetical protein                    | 43.9  | 449  | Mb3865  | hypothetical protein                  | 43.9  | 449  | Mb3865  | hypothetical protein                  | 43.9  | 449  | MAP1708  | hypothetical protein               | 217  | 100   |
| MAP4_2125 | Short-chain dehydrogenase                                  | 236  | Rv1483  | 3-oxoacyl-acyl-carrier protein redu     | 36.86 | 247  | Mb1519  | 3-oxoacyl-ACP reductase               | 36.86 | 247  | Mb1519  | 3-oxoacyl-ACP reductase               | 36.86 | 247  | MAP1707  | short chain dehydrogenase          | 236  | 100   |
| MAP4_2126 | thiolase                                                   | 145  | Rv1987  | Possible thiolase                       | 73.29 | 142  | Mb2009  | thiolase                              | 73.29 | 142  | Mb2009  | thiolase                              | 73.29 | 142  | MAP1705  | hypothetical protein               | 145  | 100   |
| MAP4_2127 | Transcriptional regulator, AraC family                     | 280  | Rv1931c | Probable transcriptional regulatory p   | 36.86 | 259  | Mb1966c | transcriptional regulator             | 25.88 | 259  | Mb1966c | transcriptional regulator             | 25.88 | 259  | MAP1705c | hypothetical protein               | 280  | 100   |
| MAP4_2128 | glyoxalase family protein                                  | 113  | Rv0687c | hypothetical protein                    | 29.84 | 152  | Mb0911c | hypothetical protein                  | 29.84 | 152  | Mb0911c | hypothetical protein                  | 29.84 | 152  | MAP1704c | hypothetical protein               | 113  | 100   |
| MAP4_2129 | hypothetical protein                                       | 137  | Rv1291c | Conserved hypothetical secreted pr      | 34.88 | 111  | Mb1232c | hypothetical protein                  | 34.88 | 111  | Mb1232c | hypothetical protein                  | 34.88 | 111  | MAP1703c | hypothetical protein               | 137  | 100   |
| MAP4_2130 | hypothetical protein                                       | 106  | Rv0794c | Probable oxidoreductase                 | 25.57 | 499  | Mb1201c | hypothetical protein                  | 31.25 | 255  | Mb1201c | hypothetical protein                  | 31.25 | 255  | MAP1703  | hypothetical protein               | 106  | 99.95 |
| MAP4_2131 | hypothetical protein                                       | 151  | Rv1221  | Alternative RNA polymerase sigma f      | 33.9  | 257  | Mb1253  | RNA polymerase sigma factor           | 33.9  | 257  | Mb1253  | RNA polymerase sigma factor           | 33.9  | 257  | MAP1702c | hypothetical protein               | 151  | 100   |
| MAP4_2132 | carboxylase                                                | 491  | Rv1722  | Possible carboxylase                    | 83.95 | 494  | Mb1715  | biotin carboxylase                    | 83.74 | 494  | Mb1715  | biotin carboxylase-like factor        | 83.74 | 494  | MAP1701c | biotin carboxylase-like protein    | 491  | 100   |
| MAP4_2133 | hydrolase                                                  | 391  | Rv1723  | Probable hydrolase                      | 78.09 | 415  | Mb1752  | hydrolase                             | 78.09 | 415  | Mb1752  | hydrolase                             | 78.09 | 415  | MAP1700c | hypothetical protein               | 391  | 100   |
| MAP4_2134 | thiamine biosynthesis protein ThiI                         | 409  | Rv3917c | Probable chromosome partitioning p      | 34.21 | 344  | Mb3948c | chromosome partitioning prot          | 34.21 | 344  | Mb3948c | chromosome partitioning prot          | 34.21 | 344  | MAP1699  | thiamine biosynthesis protein ThiI | 409  | 100   |
| MAP4_2135 | HEAT shock protein HspA                                    | 126  | Rv2031c | Heat shock protein hspA (alpha-cry      | 32.78 | 126  | Mb2031c | Heat shock protein hspA               | 32.78 | 126  | Mb2031c | Heat shock protein hspA               | 32.78 | 126  | MAP1698  | HspA_2                             | 126  | 99.95 |
| MAP4_2136 | merB family heat shock protein transcriptional repress     | 142  | Rv0353  | Probable merB family heat shock protein | 32.78 | 126  | Mb0353  | HEAT shock protein transcript         | 32.78 | 126  | Mb0353  | HEAT shock protein transcript         | 32.78 | 126  | MAP1697  | hypothetical protein               | 142  | 99.21 |
| MAP4_2137 | 18 kDa antigen, heat shock protein                         | 126  | Rv2031c | Heat shock protein HspX (alpha-cry      | 31.78 | 144  | Mb2037c | heat shock protein hspX               | 31.78 | 144  | Mb2037c | heat shock protein hspX               | 31.78 | 144  | MAP1696  | Hsp18_1                            | 126  | 100   |
| MAP4_2138 | molecular chaperone, DnaI domain-containing protein        | 144  | Rv0352  | Probable chaperone protein DnaI         | 42.03 | 395  | Mb0350  | molecular chaperone DnaI              | 42.03 | 395  | Mb0350  | molecular chaperone DnaI              | 42.03 | 395  | MAP1695c | hypothetical protein               | 144  | 100   |
| MAP4_2139 | putative polyketide synthase associated protein PA Pa      | 505  | Rv3820c | Probable conserved polyketide synt      | 54.9  | 468  | Mb3820c | polyketide synthase                   | 54.9  | 468  | Mb3820c | polyketide synthase                   | 54.9  | 468  | MAP1694  | PaPa2                              | 505  | 100   |
| MAP4_2140 | 3-oxoacyl-acyl-coA-trans isomerase domain-containing       | 3625 | Rv1350  | Probable 3-oxoacyl-acyl-carrier pro     | 36.25 | 247  | Mb1385  | 3-ketoacyl-ACP reductase              | 36.25 | 247  | Mb1385  | 3-ketoacyl-ACP reductase              | 36.25 | 247  | MAP1693c | hypothetical protein               | 3625 | 100   |
| MAP4_2141 | hypothetical protein                                       | 228  | Rv1587  | hypothetical protein                    | 36.21 | 285  | Mb3492  | hypothetical protein                  | 36.21 | 285  | Mb3492  | hypothetical protein                  | 36.21 | 285  | MAP1692c | hypothetical protein               | 228  | 100   |
| MAP4_2142 | hypothetical protein                                       | 187  | Rv3342  | Possible methyltransferase (methyl      | 38.31 | 243  | Mb3342a | methyltransferase                     | 38.31 | 243  | Mb3342a | methyltransferase                     | 38.31 | 243  | MAP1690c | hypothetical protein               | 187  | 100   |
| MAP4_2143 | hydrolase, peptidase M42 family protein                    | 411  | Rv2381c | Possible methyltransferase MbtD (oxy    | 27.59 | 1004 | Mb2437c | methyltransferase                     | 27.59 | 1004 | Mb2437c | methyltransferase                     | 27.59 | 1004 | MAP1689  | hypothetical protein               | 411  | 100   |
| MAP4_2144 | hydrolase, peptidase M42 family subunit                    | 293  | Rv2396c | Probable hydrolase peptidase M42        | 32.12 | 273  | Mb2396c | hydrolase (pro-3)-lyase subunit       | 32.12 | 273  | Mb2396c | hydrolase (pro-3)-lyase subunit       | 32.12 | 273  | MAP1688  | hypothetical protein               | 293  | 100   |
| MAP4_2145 | hypothetical protein                                       | 318  | Rv1729c | Possible 5-adenosylmethionine-dep       | 37.99 | 312  | Mb1729c | hypothetical protein                  | 37.99 | 312  | Mb1729c | hypothetical protein                  | 37.99 | 312  | MAP1687c | hypothetical protein               | 318  | 100   |
| MAP4_2146 | glucose-6-phosphate 1-dehydrogenase                        | 826  | Rv1447c | Probable glucose-6-phosphate 1-deh      | 40.06 | 514  | Mb1482c | glucose-6-phosphate 1-dehyd           | 40.06 | 514  | Mb1482c | glucose-6-phosphate 1-dehyd           | 40.06 | 514  | MAP1686  | hypothetical protein               | 826  | 100   |
| MAP4_2147 | hypothetical protein                                       | 60   | Rv0350  | Probable chaperone protein DnaK         | 46.15 | 625  | Mb0358  | molecular chaperone DnaK              | 46.15 | 625  | Mb0358  | molecular chaperone DnaK              | 46.15 | 625  | MAP3840  | molecular chaperone DnaK           | 60   | 45.71 |
| MAP4_2148 | hypothetical protein                                       | 323  | Rv1192  | hypothetical protein                    | 34.15 | 275  | Mb1192  | hypothetical protein                  | 34.15 | 275  | Mb1192  | hypothetical protein                  | 34.15 | 275  | MAP1686  | hypothetical protein               | 323  | 100   |
| MAP4_2149 | putative monooxygenase, FAD-binding domain-containing prot | 125  | Rv1251  | Probable oxidoreductase                 | 26.9  | 460  | Mb1251  | hypothetical protein                  | 26.9  | 460  | Mb1251  | hypothetical protein                  | 26.9  | 460  | MAP1685  | hypothetical protein               | 125  | 100   |
| MAP4_2150 | putative diguanylate cyclase, GEDF domain-containing       | 1314 | Rv1873  | Possible triphosphatidyl synthase (di   | 31.37 | 446  | Mb1873  | hypothetical protein                  | 31.37 | 446  | Mb1873  | hypothetical protein                  | 31.37 | 446  | MAP1684  | hypothetical protein               | 1314 | 100   |
| MAP4_2151 | ATP-dependent helicase HrpA                                | 306  | Rv1354c | Probable conserved integrase memb       | 30.47 | 289  | Mb1358c | hypothetical protein                  | 30.47 | 289  | Mb1358c | hypothetical protein                  | 30.47 | 289  | MAP1683c | hypothetical protein               | 306  | 100   |
| MAP4_2152 | putative diacylglycerol kinase, GEDF domain-containing     | 257  | Rv1070c | Probable enoyl-CoA hydratase            | 37.21 | 257  | Mb1099c | enoyl-CoA hydratase/isomerase         | 37.21 | 257  | Mb1099c | enoyl-CoA hydratase/isomerase         | 37.21 | 257  | MAP1681c | hypothetical protein               | 257  | 100   |
| MAP4_2153 | putative precursor cfp21                                   | 210  | Rv0946c | Probable putative precursor cfp21       | 74.98 | 217  | Mb0946c | hypothetical protein                  | 74.98 | 217  | Mb0946c | hypothetical protein                  | 74.98 | 217  | MAP1680c | hypothetical protein               | 210  | 100   |
| MAP4_2154 | hypothetical protein                                       | 89   | Rv2677c | Probable protoporphyrinogen oxid        | 30.68 | 42   | Mb2695c | protoporphyrinogen oxidase            | 30.68 | 42   | Mb2695c | protoporphyrinogen oxidase            | 30.68 | 42   | MAP1679c | hypothetical protein               | 89   | 100   |
| MAP4_2155 | hypothetical protein                                       | 218  | Rv2674  | Probable peptide methionine sulfon      | 26.42 | 136  | Mb2674  | hypothetical protein                  | 26.42 | 136  | Mb2674  | hypothetical protein                  | 26.42 | 136  | MAP1678c | hypothetical protein               | 218  | 100   |
| MAP4_2156 | hypothetical protein, MOSC domain-containing prot          | 279  | Rv0595c | Possible toxin VapC4                    | 36.17 | 130  | Mb0611c | hypothetical protein                  | 36.17 | 130  | Mb0611c | hypothetical protein                  | 36.17 | 130  | MAP1678  | hypothetical protein               | 279  | 100   |
| MAP4_2157 | hypothetical protein                                       | 411  | Rv2168c | hypothetical protein                    | 41.41 | 232  | Mb1299c | hypothetical protein                  | 41.41 | 232  | Mb1299c | hypothetical protein                  | 41.41 | 232  | MAP1677  | hypothetical protein               | 411  | 100   |
| MAP4_2158 | glyoxylate reductase                                       | 349  | Rv1524  | Probable glyoxylate reductase           | 55.65 | 414  | Mb1524  | glyoxylate reductase                  | 55.65 | 414  | Mb1524  | glyoxylate reductase                  | 55.65 | 414  | MAP1676  | hypothetical protein               | 349  | 100   |
| MAP4_2159 | hypothetical protein                                       | 349  | Rv2423  | hypothetical protein                    | 57.93 | 349  | Mb2446  | hypothetical protein                  | 57.93 | 349  | Mb2446  | hypothetical protein                  | 57.93 | 349  | MAP1675c | hypothetical protein               | 349  | 100   |
| MAP4_2160 | FAD dependent oxidoreductase                               | 506  | Rv0492c | Probable oxidoreductase GMC-type        | 63.33 | 629  | Mb0502c | oxidoreductase GMC-type               | 63.33 | 629  | Mb0502c | oxidoreductase GMC-type               | 63.33 | 629  | MAP1672  | hypothetical protein               | 506  | 99.8  |
| MAP4_2161 | putative LD-transpeptidase, catalytic domain protein       | 424  | Rv0393  | Conserved 13E12 repeat family pr        | 44.74 | 441  | Mb0399  | hypothetical protein                  | 44.74 | 441  | Mb0399  | hypothetical protein                  | 44.74 | 441  | MAP1671  | hypothetical protein               | 424  | 100   |
| MAP4_2162 | putative L-D-transpeptidase, lipoprotein                   | 416  | Rv2518c | Probable L-D-transpeptidase LipD        | 41.06 | 408  | Mb2547c | lipoprotein lipD                      | 41.06 | 408  | Mb2547c | lipoprotein lipD                      | 41.06 | 408  | MAP1670c | hypothetical protein               | 416  | 100   |
| MAP4_2163 | putative uptake regulation protein Fur (fur)               | 78   | Rv1096c | Ferric uptake regulation protein Fur    | 79.78 | 147  | Mb1096c | ferric uptake regulation protein      | 79.78 | 147  | Mb1096c | ferric uptake regulation protein      | 79.78 | 147  | MAP1669c | hypothetical protein               | 78   | 100   |
| MAP4_2164 | putative catalase-peroxidase, peroxyltransferase TKATG     | 748  | Rv1908c | Catalase-peroxidase-peroxyltransfer     | 70.7  | 740  | Mb1943c | catalase-peroxidase-peroxyl           | 70.85 | 740  | Mb1943c | catalase-peroxidase-peroxyl           | 70.85 | 740  | MAP1668c | KATG                               | 748  | 100   |
| MAP4_2165 | hypothetical protein                                       | 217  | Rv2525c | Conserved hypothetical protein Sec      | 37.11 | 24   |         |                                       |       |      |         |                                       |       |      |          |                                    |      |       |

Table S1 continued

|           |                                                       |      |         |                                        |       |      |          |                                   |       |      |           |                                     |       |     |           |                                  |       |      |          |                               |     |       |
|-----------|-------------------------------------------------------|------|---------|----------------------------------------|-------|------|----------|-----------------------------------|-------|------|-----------|-------------------------------------|-------|-----|-----------|----------------------------------|-------|------|----------|-------------------------------|-----|-------|
| MAP4_2207 | major facilitator superfamily (MFS) transporter       | 455  | Rv2459  | Probable conserved integral membr      | 33.18 | 508  | Mb2486   | Integral membrane transport       | 33.18 | 508  | MbV_1387  | drug transporter                    | 32.61 | 626 | BCG_2479  | integral membrane transport p    | 33.18 | 508  | MAP1632c | hypothetical protein          | 425 | 100   |
| MAP4_2208 | Transcriptional regulator, TetR family                | 225  | Rv0196  | Possible transcriptional regulatory p  | 26.02 | 194  | Mb0202   | Transcriptional regulator         | 26.02 | 194  | MbV_1931  | TetR family transcriptional regulat | 41.38 | 211 | BCG_2433  | transcriptional regulatory prot  | 26.02 | 194  | MAP1631c | hypothetical protein          | 225 | 100   |
| MAP4_2209 | hypothetical protein                                  | 249  | Rv1906c | hypothetical protein                   | 53.71 | 326  | Mb1906c  | hypothetical protein              | 53.71 | 326  | MbV_1906c | hypothetical protein                | 98.36 | 329 | BCG_1906c | hypothetical protein             | 53.71 | 326  | MAP1630c | hypothetical protein          | 249 | 100   |
| MAP4_2210 | D-amino acid oxidase                                  | 321  | Rv1905c | Probable D-amino acid oxidase Aao      | 67.52 | 320  | Mb1940c  | D-amino acid oxidase aao          | 67.52 | 320  | MbV_2792  | D-dependent oxidoreductase          | 99.38 | 323 | BCG_1944c | D-amino acid oxidase aao         | 67.83 | 326  | MAP1629c | hypothetical protein          | 321 | 100   |
| MAP4_2211 | hypothetical protein                                  | 129  | Rv1933  | Probable conserved membrane pro        | 84    | 134  | Mb1938   | hypothetical protein              | 84    | 134  | MbV_2797  | hypothetical protein                | 100   | 129 | BCG_1942  | hypothetical protein             | 100   | 129  | MAP1628  | hypothetical protein          | 129 | 100   |
| MAP4_2212 | putative amidohydrolase                               | 355  | Rv2303c | Probable antibiotic-resistance transp  | 27.17 | 307  | Mb2325c  | antibiotic-resistance protein     | 27.17 | 307  | MbV_2798  | amidohydrolase                      | 98.87 | 355 | BCG_2319c | antibiotic-resistance protein    | 27.17 | 307  | MAP1627  | hypothetical protein          | 355 | 100   |
| MAP4_2213 | sialic acid-transp membrane protein nanT              | 424  | Rv1902c | Probable sialic acid-transp integr     | 87.1  | 422  | Mb1937c  | sialic acid-transp integr         | 87.1  | 422  | MbV_2799  | MFS transporter, sialate H+ symo    | 98.82 | 450 | BCG_1941c | sialic acid-transp integr m      | 87.1  | 422  | MAP1626c | nanT                          | 424 | 99.76 |
| MAP4_2214 | Contractile vacuole-inducible protein CnaI            | 434  | Rv1901c | Probable Cna-like protein CnaI         | 80.56 | 430  | Mb1901c  | Contractile vacuole-inducib       | 80.56 | 430  | MbV_2800  | Contractile vacuole-inducible pro   | 99.08 | 434 | BCG_1940  | Contractile vacuole-inducib      | 80.56 | 430  | MAP1625c | Contractile vacuole-inducible | 434 | 100   |
| MAP4_2215 | hypothetical protein                                  | 101  | Rv1898  | hypothetical protein                   | 87.76 | 102  | Mb1913   | hypothetical protein              | 87.76 | 102  | MbV_2801  | hypothetical protein                | 100   | 101 | BCG_1937  | hypothetical protein             | 87.76 | 102  | MAP1624  | hypothetical protein          | 101 | 100   |
| MAP4_2216 | D-tyrosyl-tRNA(Tyr) deacylase                         | 143  | Rv1897c | hypothetical protein                   | 80.28 | 143  | Mb1932c  | D-tyrosyl-tRNA(Tyr) deacylas      | 80.28 | 143  | MbV_2802  | D-tyrosyl-tRNA(Tyr) deacylase       | 97.2  | 143 | BCG_1936c | D-tyrosyl-tRNA(Tyr) deacylas     | 79.58 | 143  | MAP1623c | D-tyrosyl-tRNA(Tyr) deacylase | 143 | 100   |
| MAP4_2217 | methyltransferase, leucine carboxyl methyltransferase | 302  | Rv1896c | hypothetical protein                   | 74.83 | 303  | Mb1931c  | hypothetical protein              | 74.83 | 303  | MbV_2803  | methyltransferase, putative, fam    | 99.67 | 302 | BCG_1935c | hypothetical protein             | 74.83 | 303  | MAP1622c | hypothetical protein          | 302 | 100   |
| MAP4_2218 | dehydrogenase                                         | 341  | Rv1895  | Possible dehydrogenase                 | 78.3  | 384  | Mb1929   | dehydrogenase                     | 83.26 | 234  | MbV_2804  | zinc-binding dehydrogenase          | 99.71 | 341 | BCG_1934  | dehydrogenase                    | 83.26 | 234  | MAP1621c | hypothetical protein          | 341 | 100   |
| MAP4_2219 | monooxygenase                                         | 649  | Rv1932c | Probable monooxygenase                 | 36.71 | 492  | Mb1928c  | monooxygenase                     | 36.71 | 492  | MbV_2805  | short chain dehydrogenase           | 98.81 | 650 | BCG_1454c | monooxygenase                    | 36.71 | 492  | MAP1620  | hypothetical protein          | 649 | 100   |
| MAP4_2220 | REP133 repeat protein                                 | 64.8 | Rv1326c | hypothetical protein                   | 64.8  | 451  | Mb1915c  | hypothetical protein              | 64.8  | 451  | MbV_2806  | hypothetical protein                | 98.59 | 469 | BCG_1933c | hypothetical protein             | 64.8  | 451  | MAP1619  | hypothetical protein          | 671 | 100   |
| MAP4_2221 | oxidoreductase, 2-nitropropane dioxygenase family pr  | 376  | Rv1894c | hypothetical protein                   | 90.96 | 376  | Mb1927c  | hypothetical protein              | 90.96 | 376  | MbV_2807  | oxidoreductase, 2-nitropropane di   | 100   | 376 | BCG_1932c | hypothetical protein             | 90.96 | 376  | MAP1618c | hypothetical protein          | 376 | 100   |
| MAP4_2222 | hypothetical protein                                  | 76   | Rv1893  | hypothetical protein                   | 82.61 | 72   | Mb1926   | hypothetical protein              | 82.61 | 72   | MbV_2808  | hypothetical protein                | 100   | 76  | BCG_1931  | hypothetical protein             | 82.61 | 72   | MAP1617  | hypothetical protein          | 76  | 100   |
| MAP4_2223 | hypothetical protein                                  | 104  | Rv1892  | Probable membrane protein              | 79.79 | 103  | Mb1925   | hypothetical protein              | 79.79 | 103  | MbV_2809  | hypothetical protein                | 98.08 | 109 | BCG_1930  | hypothetical protein             | 79.79 | 103  | MAP1616  | hypothetical protein          | 104 | 100   |
| MAP4_2224 | hypothetical protein                                  | 132  | Rv1891  | hypothetical protein                   | 79.1  | 135  | Mb1924   | hypothetical protein              | 79.1  | 135  | MbV_2810  | hypothetical protein                | 100   | 132 | BCG_1929  | hypothetical protein             | 79.1  | 135  | MAP1615  | hypothetical protein          | 132 | 100   |
| MAP4_2225 | cytochrome P450                                       | 428  | Rv1845c | Probable cytochrome P450 125 Cyp1      | 74.41 | 433  | Mb1875c  | cytochrome P450 125               | 74.41 | 433  | MbV_2811  | cytochrome P450 124                 | 99.53 | 428 | BCG_3009c | cytochrome P450 125 cyp125       | 74.41 | 433  | MAP1614c | hypothetical protein          | 428 | 100   |
| MAP4_2226 | Alcohol dehydrogenase                                 | 337  | Rv3045  | Probable NADP-dependent alcohol d      | 31.3  | 346  | Mb3071   | NADP-dependent alcohol det        | 31.3  | 346  | MbV_2812  | aldehyde dehydrogenase              | 99.69 | 322 | BCG_3069  | NADP-dependent alcohol dehy      | 31.3  | 346  | MAP1613c | Adh_2                         | 337 | 100   |
| MAP4_2227 | hypothetical protein                                  | 188  | Rv1890c | hypothetical protein                   | 70.17 | 203  | Mb1923c  | hypothetical protein              | 70.17 | 203  | MbV_2813  | hypothetical protein                | 95.21 | 188 | BCG_1928c | hypothetical protein             | 70.17 | 203  | MAP1612c | hypothetical protein          | 188 | 100   |
| MAP4_2228 | hypothetical protein                                  | 383  | Rv1887  | hypothetical protein                   | 57.22 | 380  | Mb1919   | hypothetical protein              | 57.22 | 380  | MbV_2814  | hypothetical protein                | 98.67 | 375 | BCG_1924  | hypothetical protein             | 56.96 | 380  | MAP1611  | hypothetical protein          | 383 | 100   |
| MAP4_2229 | hypothetical protein                                  | 134  | Rv1886c | Probable conserved like associated     | 47.83 | 213  | Mb1929   | Transposase                       | 50    | 221  | MbV_2396  | mercuric reductase                  | 2.47  | 456 | BCG_2192c | Transposase                      | 50    | 221  | MAP1610  | hypothetical protein          | 134 | 100   |
| MAP4_2230 | secreted floerquin-binding protein antigen85-B FpbB   | 330  | Rv1886c | Secreted antigen 85-B FpbB (85B) fa    | 85.49 | 325  | Mb1918c  | secreted antigen 85-B FpbB        | 85.49 | 325  | MbV_2816  | antigen 85-B                        | 100   | 330 | BCG_1923c | hypothetical protein             | 85.19 | 325  | MAP1609c | FpbB                          | 330 | 99.7  |
| MAP4_2231 | Periplasmic chorismate mutase 1 precursor             | 187  | Rv1885c | Chorismate mutase                      | 60.98 | 199  | Mb1917c  | chorismate mutase                 | 60.98 | 199  | MbV_2817  | chorismate mutase                   | 98.93 | 187 | BCG_1922c | chorismate mutase                | 60.98 | 199  | MAP1608c | chorismate mutase             | 168 | 99.4  |
| MAP4_2232 | resuscitation-promoting factor RpfC                   | 170  | Rv1884c | Probable resuscitation-promoting fa    | 65.64 | 176  | Mb1916c  | resuscitation-promoting fact      | 65.64 | 176  | MbV_2818  | resuscitation-promoting factor Rpf  | 99.08 | 199 | BCG_1921c | resuscitation-promoting factor   | 65.64 | 176  | MAP1607c | hypothetical protein          | 170 | 100   |
| MAP4_2233 | lysyl-tRNA synthetase superfamily protein             | 159  | Rv1883c | hypothetical protein                   | 78.34 | 153  | Mb1915c  | hypothetical protein              | 80.89 | 158  | MbV_2819  | lysyl-tRNA synthetase               | 99.35 | 153 | BCG_1920c | hypothetical protein             | 80.89 | 158  | MAP1606c | hypothetical protein          | 159 | 100   |
| MAP4_2234 | short-chain type dehydrogenase/sero                   | 249  | Rv1882c | Probable short-chain type dehydrog     | 80.87 | 247  | Mb1914c  | short chain dehydrogenase         | 80.87 | 247  | MbV_2820  | short chain dehydrogenase           | 99.78 | 277 | BCG_1919c | short chain dehydrogenase        | 80.78 | 277  | MAP1605c | short chain dehydrogenase     | 249 | 100   |
| MAP4_2235 | lipoprotein                                           | 140  | Rv1881c | Possible conserved lipoprotein Lpp     | 65    | 140  | Mb1913c  | lipoprotein Lpp                   | 65    | 140  | MbV_2821  | LppE protein                        | 99.29 | 140 | BCG_1918c | lipoprotein lppE                 | 65    | 140  | MAP1604c | hypothetical protein          | 140 | 100   |
| MAP4_2236 | Putative cytochrome P450 Cyp140                       | 450  | Rv1880c | Probable cytochrome P450 140 Cyp14     | 77.8  | 438  | Mb1912c  | cytochrome p450 140 CYP140        | 77.8  | 438  | MbV_2822  | 5-alpha-heme-thiolase protein       | 99.78 | 450 | BCG_1917c | cytochrome p450 140 CYP140       | 77.8  | 438  | MAP1603c | hypothetical protein          | 450 | 100   |
| MAP4_2237 | hypothetical protein                                  | 126  | Rv1879c | Epoxide hydrolase                      | 24.64 | 149  | Mb2760   | hypothetical protein              | 24.64 | 149  | MbV_2823  | linonene-1,2-epoxide hydrolase ca   | 97.28 | 147 | BCG_2754  | epoxide hydrolase                | 24.64 | 149  | MAP1602c | hypothetical protein          | 126 | 100   |
| MAP4_2238 | hypothetical protein                                  | 44   | Rv2029c | Possible conserved membrane prot       | 44    | 226  | Mb0234c  | hypothetical protein              | 44    | 226  | MbV_2824  | hypothetical protein                | 98.72 | 392 | BCG_0266c | hypothetical protein             | 44    | 226  | MAP1601  | hypothetical protein          | 44  | 100   |
| MAP4_2239 | putative amidohydrolase                               | 450  | Rv1879  | hypothetical protein                   | 75.75 | 378  | Mb1911   | hypothetical protein              | 80.67 | 378  | MbV_2825  | amidohydrolase                      | 99.50 | 372 | BCG_1916  | hypothetical protein             | 75.75 | 378  | MAP1600c | hypothetical protein          | 450 | 100   |
| MAP4_2240 | Gluconate synthetase                                  | 393  | Rv1878  | Probable gluconate synthetase GlnK     | 80.87 | 450  | Mb1910   | gluconate synthetase catalytic do | 80.87 | 450  | MbV_2826  | gluconate synthetase catalytic do   | 99.95 | 450 | BCG_1915  | gluconate synthetase glnK3       | 80.87 | 450  | MAP1599c | hypothetical protein          | 393 | 100   |
| MAP4_2241 | oxidoreductase                                        | 292  | Rv0940c | Possible oxidoreductase                | 35.43 | 288  | Mb0965c  | oxidoreductase                    | 35.43 | 288  | MbV_2830  | oxidoreductase                      | 97.95 | 293 | BCG_0949c | oxidoreductase                   | 35.43 | 288  | MAP1598  | hypothetical protein          | 292 | 100   |
| MAP4_2242 | hypothetical protein                                  | 164  | Rv1259c | hypothetical protein                   | 40.48 | 344  | MbV_2831 | hypothetical protein              | 40.48 | 344  | MbV_2831  | hypothetical protein                | 100   | 164 | BCG_2176c | hypothetical protein             | 40.48 | 344  | MAP1597  | hypothetical protein          | 164 | 100   |
| MAP4_2243 | hypothetical protein                                  | 689  | Rv1877  | Probable conserved integral membr      | 62.93 | 687  | Mb1909   | hypothetical protein              | 61.58 | 404  | MbV_2832  | drug transporter                    | 99.12 | 682 | BCG_1914  | integral membrane protein        | 61.58 | 404  | MAP1596  | hypothetical protein          | 689 | 100   |
| MAP4_2244 | hypothetical protein (PR)                             | 159  | Rv1876  | Probable bacterioferritin BfrA         | 88.95 | 159  | Mb1907   | bacterioferritin                  | 88.95 | 159  | MbV_2833  | bacterioferritin                    | 99.12 | 159 | BCG_1913  | bacterioferritin bfrA            | 88.95 | 159  | MAP1595  | hypothetical protein          | 159 | 100   |
| MAP4_2245 | hypothetical protein                                  | 331  | Rv170c  | Probable DNA polymerase III (alpha     | 33.33 | 1079 | Mb3045c  | error-prone DNA polymerase        | 33.33 | 1091 | MbV_2834  | hypothetical protein                | 100   | 331 | BCG_3442c | error-prone DNA polymerase       | 33.33 | 1079 | MAP1594c | hypothetical protein          | 331 | 100   |
| MAP4_2246 | Enoyl-CoA hydratase                                   | 249  | Rv1070c | Probable enoyl-CoA hydratase EChA      | 30.12 | 257  | Mb1099c  | enoyl-CoA hydratase/isomerase     | 30.12 | 257  | MbV_2835  | enoyl-CoA hydratase/isomerase       | 100   | 249 | BCG_1002c | enoyl-CoA hydratase              | 30.12 | 257  | MAP1593  | hypothetical protein          | 249 | 100   |
| MAP4_2247 | hypothetical protein                                  | 147  | Rv1875  | hypothetical protein                   | 82.99 | 147  | Mb1906   | hypothetical protein              | 82.99 | 147  | MbV_2836  | pyridoxamine 5'-phosphate oxidas    | 98.64 | 147 | BCG_1911  | hypothetical protein             | 82.99 | 147  | MAP1592  | hypothetical protein          | 147 | 100   |
| MAP4_2248 | hypothetical protein                                  | 233  | Rv1874  | hypothetical protein                   | 76.55 | 228  | Mb1905   | hypothetical protein              | 76.55 | 228  | MbV_2837  | hypothetical protein                | 99.14 | 233 | BCG_1910  | hypothetical protein             | 76.55 | 228  | MAP1591  | hypothetical protein          | 233 | 100   |
| MAP4_2249 | hydrogen peroxide-inducible genes act                 | 249  | Rv1873c | Probable transcriptional regulator Hxv | 80.23 | 212  | Mb1903c  | hydrogen peroxide-inducible gene  | 80.23 | 212  | MbV_2838  | hydrogen peroxide-inducible gene    | 99.14 | 249 | BCG_2297c | hydrogen peroxide-inducible gene | 80.23 | 212  | MAP1590c | hypothetical protein          | 249 | 100   |
| MAP4_2250 | alkyl hydroperoxide reductase C protein AhpC          | 195  | Rv2428  | alkyl hydroperoxide reductase C pr     | 87.74 | 195  | Mb2454   | alkyl hydroperoxide reductase     | 87.74 | 195  | MbV_2839  | alkyl hydroperoxide reductase       | 99.49 | 195 | BCG_2248c | alkyl hydroperoxide reductase    | 87.74 | 195  | MAP1589c | hypothetical protein          | 195 | 100   |
| MAP4_2251 | alkyl hydroperoxide reductase D protein AhpD          | 178  | Rv2429  | alkyl hydroperoxide reductase D pr     | 73.45 | 177  | Mb2455   | alkyl hydroperoxide reductas      | 73.45 | 177  | MbV_2840  | alkylhydroperoxidase, AhpD family   | 99.44 | 178 | BCG_2247c | alkyl hydroperoxide reductase    | 73.45 | 177  | MAP1588c | AhpD                          | 178 | 100   |
| MAP4_2252 | putative alpha amylase                                | 444  | Rv0126  | Trehalose synthase TreS                | 31.34 | 601  | Mb0131   | trehalose synthase TreS           | 31.34 | 601  | MbV_2842  | alpha-amylase 3                     | 98.64 | 440 | BCG_0160  | trehalose synthase tres          | 31.34 | 601  | MAP1587c | hypothetical protein          | 444 | 100   |
| MAP4_2253 | hypothetical protein                                  | 151  | Rv1873  | hypothetical protein                   | 74.13 | 145  | Mb1904   | hypothetical protein              | 73.43 | 145  | MbV_2841  | alpha-amylase 3                     | 98.64 | 151 | BCG_1909  | hypothetical protein             | 74.13 | 145  | MAP1586  | hypothetical protein          | 151 | 100   |
| MAP4_2254 | lactate dehydrogenase                                 | 440  | Rv1872c | Possible lactate dehydrogenase Lcd     | 65.61 | 414  | Mb1907c  | lactate dehydrogenase (cyto       | 66.1  | 414  | MbV_284   |                                     |       |     |           |                                  |       |      |          |                               |     |       |





## Table S1 continued

|           |                                                        |      |         |                                        |       |      |          |                                  |       |      |          |                                       |       |      |           |                                    |       |      |          |                                         |      |       |
|-----------|--------------------------------------------------------|------|---------|----------------------------------------|-------|------|----------|----------------------------------|-------|------|----------|---------------------------------------|-------|------|-----------|------------------------------------|-------|------|----------|-----------------------------------------|------|-------|
| MAPA_2407 | hypothetical protein                                   | 328  | Rv1313c | Possible adenylate cyclase (ATP pyr)   | 40    | 535  | Mb01353c | adenylate cyclase                | 40    | 535  | Mb01353c | adenylate cyclase                     | 98.78 | 358  | BCG_1380C | adenylate cyclase                  | 40    | 535  | MAP1437c | hypothetical protein                    | 328  | 100   |
| MAPA_2408 | short chain dehydrogenase                              | 26   | Rv2857c | Probable short-chain type dehydrog     | 35.66 | 258  | Mb2857c  | short chain dehydrogenase        | 35.66 | 258  | MbV_3034 | oxido-reductase                       | 99.23 | 260  | BCG_2879c | short chain dehydrogenase          | 35.66 | 258  | MAP1436c | hypothetical protein                    | 328  | 100   |
| MAPA_2409 | short chain dehydrogenase/reductase SDR family prote   | 262  | Rv1296c | Probable short-chain type dehydrog     | 26.28 | 295  | Mb1296c  | short chain dehydrogenase/reduct | 26.28 | 295  | MbV_3035 | short chain dehydrogenase/reduct      | 98.82 | 262  | BCG_3592c | short chain dehydrogenase          | 26.28 | 295  | MAP1435c | hypothetical protein                    | 262  | 99.98 |
| MAPA_2410 | hypothetical protein                                   | 34   | Rv3527  | hypothetical protein                   | 32.93 | 149  | Mb3527   | hypothetical protein             | 32.93 | 149  | MbV_3036 | hypothetical protein                  | 98.83 | 34   | BCG_3593c | hypothetical protein               | 32.93 | 149  | MbV3536c | hypothetical protein                    | 34   | 36.36 |
| MAPA_2411 | oxido-reductase                                        | 372  | Rv3256  | Oxygenase component of 3-ketoxe        | 61.2  | 386  | Mb3256   | oxido-reductase                  | 61.2  | 386  | MbV_3037 | oxygenase kJha                        | 99.19 | 370  | BCG_3590c | oxido-reductase                    | 61.2  | 386  | MAP1434c | hypothetical protein                    | 372  | 100   |
| MAPA_2412 | 3-ketosteroid-delta-1-dehydrogenase                    | 43.6 | Rv3537  | Probable dehydrogenase                 | 43.6  | 563  | Mb3537   | 3-ketosteroid-delta-1-dehydr     | 43.6  | 563  | MbV_3039 | 3-ketosteroid-delta-1-dehydrogen      | 99.48 | 581  | BCG_3601c | 3-ketosteroid-delta-1-dehydrog     | 43.6  | 563  | MAP1433c | 3-ketosteroid-delta-1-dehydrogenase     | 43.6 | 100   |
| MAPA_2413 | REP132 repeat protein                                  | 476  | Rv1128c | hypothetical protein                   | 63.85 | 451  | Mb1128c  | hypothetical protein             | 63.85 | 451  | MbV_3043 | hypothetical protein                  | 91.43 | 447  | BCG_1189b | hypothetical protein               | 63.85 | 451  | MAP1432c | hypothetical protein                    | 496  | 99.16 |
| MAPA_2414 | Transcriptional regulator, PaRf family                 | 276  | Rv1176c | hypothetical protein                   | 27.85 | 189  | Mb1176c  | hypothetical protein             | 27.85 | 189  | MbV_3044 | PaRf family transcriptional regulat   | 99.12 | 276  | BCG_1239c | hypothetical protein               | 27.85 | 189  | MAP1431c | hypothetical protein                    | 276  | 100   |
| MAPA_2415 | monooxygenase, cytochrome P450 family                  | 306  | Rv1079c | Probable cytochrome P450               | 33.51 | 275  | Mb1079c  | hypothetical protein             | 33.51 | 275  | MbV_3045 | hypothetical protein                  | 98.89 | 306  | BCG_1102c | hypothetical protein               | 33.51 | 275  | MAP1430c | hypothetical protein                    | 306  | 100   |
| MAPA_2416 | hypothetical protein                                   | 292  | Rv1062  | hypothetical protein                   | 24.18 | 285  | Mb1062   | hypothetical protein             | 24.18 | 285  | MbV_3046 | hypothetical protein                  | 98.63 | 291  | BCG_1120c | hypothetical protein               | 24.18 | 285  | MAP1429c | hypothetical protein                    | 292  | 100   |
| MAPA_2417 | putative pyridine nucleotide-disulphide oxidoreductase | 383  | Rv0392c | Probable membrane NADH dehydro         | 24.62 | 470  | Mb0392c  | NADH dehydrogenase               | 24.62 | 470  | MbV_3047 | pyridine nucleotide-disulphide oxi    | 99.48 | 383  | BCG_0425c | membrane NADH dehydrogen           | 24.62 | 470  | MAP1428c | hypothetical protein                    | 383  | 100   |
| MAPA_2418 | putative multicopper oxidase                           | 481  | Rv0846c | Probable oxidase                       | 28.65 | 504  | Mb0846c  | oxidase                          | 28.65 | 504  | MbV_3048 | multicopper-oxidase                   | 99.17 | 482  | BCG_0898c | oxidase                            | 28.65 | 504  | MAP1427c | hypothetical protein                    | 481  | 100   |
| MAPA_2419 | oxido-reductase                                        | 211  | Rv3007c | Possible oxido-reductase               | 54.01 | 204  | Mb3007c  | oxido-reductase                  | 54.01 | 204  | MbV_3049 | oxido-reductase                       | 98.79 | 211  | BCG_3029c | oxido-reductase                    | 54.01 | 204  | MAP1426c | hypothetical protein                    | 211  | 100   |
| MAPA_2420 | putative sulphur biosynthesis protein                  | 227  | Rv2671  | Possible bifunctional enzyme ribofla   | 38.1  | 258  | Mb2670c  | hypothetical protein             | 38.1  | 258  | MbV_3050 | hypothetical protein                  | 98.56 | 226  | BCG_2684c | hypothetical protein               | 38.1  | 258  | MAP1425c | hypothetical protein                    | 227  | 100   |
| MAPA_2421 | hypothetical protein                                   | 152  | Rv1442  | Probable biotin sulfoxide reductase    | 36.96 | 766  | Mb1442   | biotin sulfoxide reductase       | 36.96 | 766  | MbV_3051 | hypothetical protein                  | 99.34 | 155  | BCG_1503c | biotin sulfoxide reductase biot    | 36.96 | 766  | MAP1424c | hypothetical protein                    | 152  | 100   |
| MAPA_2422 | sugar transporter                                      | 496  | Rv1902c | Probable silicic acid-transport integr | 27.44 | 422  | Mb1937c  | silicic acid-transport integr    | 27.44 | 422  | MbV_3053 | sugar ABC transporter                 | 99.8  | 496  | BCG_1944c | silicic acid-transport integr m    | 27.44 | 422  | MAP1423c | hypothetical protein                    | 496  | 99.79 |
| MAPA_2423 | acetyltransferase, GNAT family ATP-grasp domain prot   | 597  | Rv2981c | Probable D-alanine-D-alanine ligase    | 32.52 | 373  | Mb3005c  | D-alanyl-alanine synthetase A    | 32.52 | 370  | MbV_3054 | GNAT family acetyltransferase         | 99.83 | 597  | BCG_3002c | D-alanyl-alanine synthetase A      | 32.52 | 373  | MAP1422c | hypothetical protein                    | 595  | 100   |
| MAPA_2424 | Asparagine synthetase                                  | 650  | Rv2201  | Probable CTP synthetase Asn            | 31.68 | 652  | Mb2024c  | asparagine synthetase AsnB       | 31.68 | 652  | MbV_3055 | asparagine synthetase (glutamine-ty   | 99.48 | 650  | BCG_2217c | asparagine synthetase AsnB         | 31.68 | 652  | MAP1421c | AsnB 1                                  | 601  | 100   |
| MAPA_2425 | peptide synthetase                                     | 6384 | Rv0101  | Probable peptide synthetase Bmr        | 51.22 | 2512 | Mb0104c  | peptide synthetase               | 51.22 | 2512 | MbV_3239 | peptide synthetase                    | 61.09 | 6312 | BCG_0134c | peptide synthetase nrg             | 51.07 | 2512 | MAP1242c | hypothetical protein                    | 6277 | 58.53 |
| MAPA_2426 | MbH-like protein                                       | 72   | Rv2377c | Putative conserved protein MbH         | 10.69 | 71   | Mb2398c  | protein MbH                      | 69.57 | 71   | MbV_3057 | hypothetical protein                  | 100   | 72   | BCG_2391f | protein MbH                        | 69.57 | 71   | MAP1419c | hypothetical protein                    | 72   | 100   |
| MAPA_2427 | hypothetical protein                                   | 161  | Rv1247  | hypothetical protein                   | 33.46 | 254  | Mb1544c  | hypothetical protein             | 33.33 | 254  | MbV_3059 | hypothetical protein                  | 99.23 | 261  | BCG_1569c | hypothetical protein               | 33.33 | 254  | MAP1418c | hypothetical protein                    | 261  | 100   |
| MAPA_2428 | hypothetical protein                                   | 244  | Rv0166  | Probable fatty-acyl-CoA ligase FadD    | 33.85 | 554  | Mb0166c  | long-chain-fatty-acyl-Coa lig    | 33.85 | 554  | MbV_3060 | hypothetical protein                  | 98.61 | 244  | BCG_0203c | long-chain-fatty-acyl-Coa lig      | 33.85 | 554  | MAP1417c | hypothetical protein                    | 244  | 100   |
| MAPA_2429 | hypothetical protein                                   | 221  | Rv2437  | Possible conserved transmembrane       | 52.94 | 158  | Mb3467   | transmembrane protein            | 52.94 | 158  | MbV_3061 | hypothetical protein                  | 100   | 221  | BCG_3503c | hypothetical protein               | 52.94 | 158  | MAP1416c | hypothetical protein                    | 221  | 100   |
| MAPA_2430 | CTP-binding protein EngA                               | 466  | Rv1713  | Probable GTP-binding protein EngA      | 87.55 | 463  | Mb1740c  | GTP-binding protein EngA         | 87.55 | 463  | MbV_3062 | CTP-binding protein EngA              | 99.27 | 466  | BCG_1792c | GTP-binding protein EngA           | 87.55 | 463  | MAP1415c | CTP-binding protein EngA                | 466  | 100   |
| MAPA_2431 | Cytidylylase                                           | 228  | Rv1712  | Cytidylylase (non-CMP kinase)          | 78.76 | 230  | Mb1739c  | cytidylylase                     | 78.76 | 230  | MbV_3064 | cytidylylase                          | 98.25 | 228  | BCG_1751c | cytidylylase                       | 78.76 | 230  | MAP1414c | cytidylylase                            | 228  | 100   |
| MAPA_2432 | ribosomal large subunit pseudouridine synthase B       | 247  | Rv1711  | hypothetical protein                   | 87.76 | 254  | Mb1738c  | hypothetical protein             | 87.76 | 254  | MbV_3065 | ribosomal large subunit pseudour      | 99.6  | 248  | BCG_1750c | hypothetical protein               | 87.76 | 254  | MAP1413c | hypothetical protein                    | 247  | 100   |
| MAPA_2433 | Segregation and condensation prot                      | 235  | Rv1710  | Possible segregation and condens       | 79.57 | 231  | Mb1737c  | hypothetical protein             | 79.57 | 231  | MbV_3066 | segregation and condensation prot     | 99.15 | 235  | BCG_1749c | hypothetical protein               | 79.57 | 231  | MAP1412c | hypothetical protein                    | 235  | 100   |
| MAPA_2434 | Segregation and condensation prot                      | 274  | Rv1709  | Possible segregation and condens       | 84.19 | 278  | Mb1736c  | hypothetical protein             | 84.19 | 278  | MbV_3067 | segregation and condensation prot     | 100   | 274  | BCG_1748c | hypothetical protein               | 84.19 | 278  | MAP1411c | hypothetical protein                    | 274  | 100   |
| MAPA_2435 | putative initiation inhibitor protein                  | 313  | Rv1708  | putative initiation inhibitor protein  | 84.86 | 313  | Mb1735c  | hypothetical protein             | 84.86 | 313  | MbV_3068 | putative initiation inhibitor protein | 99.63 | 287  | BCG_1747c | putative initiation inhibitor prot | 84.86 | 313  | MAP1410c | hypothetical protein                    | 313  | 100   |
| MAPA_2436 | catechol-O-methyltransferase                           | 34   | Rv1703c | Probable catechol-O-methyltransfer     | 80.71 | 196  | Mb1729c  | catechol-O-methyltransferase     | 80.71 | 196  | MbV_3069 | catechol-O-methyltransferase          | 99.57 | 250  | BCG_1741c | catechol-O-methyltransferase       | 80.71 | 196  | MAP1409c | hypothetical protein                    | 34   | 100   |
| MAPA_2437 | integrase/recombinase                                  | 313  | Rv1701  | site-specific tyrosine recombinase     | 89.78 | 311  | Mb1730c  | site-specific tyrosine recombin  | 89.78 | 311  | MbV_3070 | site-specific tyrosine recombinase    | 99.36 | 313  | BCG_1739c | site-specific tyrosine recombin    | 89.78 | 311  | MAP1408c | site-specific tyrosine recombinase XerD | 313  | 100   |
| MAPA_2438 | NUDX1 hydrolase                                        | 207  | Rv1700  | NUDX1 hydrolase                        | 78.26 | 207  | Mb1726c  | hypothetical protein             | 77.29 | 207  | MbV_3071 | Mut/ndux family protein               | 100   | 207  | BCG_1738c | hypothetical protein               | 78.26 | 207  | MAP1407c | hypothetical protein                    | 207  | 100   |
| MAPA_2439 | CTP synthetase                                         | 583  | Rv1699  | Probable CTP synthetase PycG           | 31.23 | 586  | Mb1725c  | CTP synthetase                   | 31.23 | 586  | MbV_3072 | CTP synthetase                        | 99.63 | 583  | BCG_1737c | CTP synthetase                     | 31.23 | 586  | MAP1406c | CTP synthetase                          | 583  | 99.98 |
| MAPA_2440 | outer membrane protein                                 | 317  | Rv1698  | Outer membrane protein MdB             | 74.76 | 313  | Mb1724c  | hypothetical protein             | 74.76 | 314  | MbV_3073 | hypothetical protein                  | 99.05 | 317  | BCG_1732c | hypothetical protein               | 74.76 | 313  | MAP1405c | hypothetical protein                    | 317  | 100   |
| MAPA_2441 | hypothetical protein                                   | 393  | Rv1697  | hypothetical protein                   | 89.82 | 393  | Mb1723c  | hypothetical protein             | 89.82 | 393  | MbV_3074 | hypothetical protein                  | 100   | 393  | BCG_1731c | hypothetical protein               | 89.82 | 393  | MAP1404c | hypothetical protein                    | 393  | 100   |
| MAPA_2442 | DNA repair protein RecN                                | 589  | Rv1696  | Probable DNA repair protein RecN       | 76.78 | 587  | Mb1722c  | DNA repair protein recN          | 76.78 | 587  | MbV_3075 | DNA repair protein RecN               | 99.83 | 589  | BCG_1734c | DNA repair protein recN            | 76.78 | 587  | MAP1403c | hypothetical protein                    | 589  | 100   |
| MAPA_2443 | inorganic polyphosphate/ATP-NAD kinase                 | 308  | Rv1695  | Inorganic polyphosphate/ATP-NAD        | 90.82 | 307  | Mb1721c  | inorganic polyphosphate/ATP      | 90.82 | 307  | MbV_3076 | inorganic polyphosphate/ATP-NAD       | 99.68 | 308  | BCG_1733c | inorganic polyphosphate/ATP-N      | 90.82 | 307  | MAP1402c | inorganic polyphosphate/ATP-NAD kinase  | 308  | 100   |
| MAPA_2444 | hemiprotein TyA                                        | 269  | Rv1694  | 2'-O-methyltransferase TyA             | 80.22 | 268  | Mb1720c  | tydostone                        | 80.22 | 268  | MbV_3077 | hemiprotein TyA                       | 99.63 | 269  | BCG_1732c | tyrosin/hemiprotein TyA            | 80.22 | 268  | MAP1401c | TyA                                     | 269  | 100   |
| MAPA_2445 | hypothetical protein                                   | 63   | Rv1693  | hypothetical protein                   | 78.69 | 59   | Mb1719c  | hypothetical protein             | 78.69 | 59   | MbV_3078 | hypothetical protein                  | 100   | 63   | BCG_1731c | hypothetical protein               | 78.69 | 59   | MAP1400c | hypothetical protein                    | 63   | 100   |
| MAPA_2446 | phosphatase                                            | 337  | Rv1692  | Probable phosphatase                   | 74.71 | 353  | Mb1718c  | phosphatase                      | 74.71 | 353  | MbV_3079 | HAD-superfamily family hydrolase      | 99.41 | 340  | BCG_1730c | phosphatase                        | 74.71 | 353  | MAP1399c | hypothetical protein                    | 337  | 100   |
| MAPA_2447 | hypothetical protein                                   | 164  | Rv1691  | hypothetical protein                   | 87.61 | 250  | Mb1717c  | hypothetical protein             | 87.61 | 250  | MbV_3080 | TPR repeat-containing protein         | 99.53 | 211  | BCG_1729c | hypothetical protein               | 87.61 | 250  | MAP1398c | hypothetical protein                    | 264  | 100   |
| MAPA_2448 | lipoprotein LprJ                                       | 222  | Rv1690  | Probable lipoprotein LprJ              | 58.41 | 127  | Mb1716c  | lipoprotein LprJ                 | 58.41 | 139  | MbV_3081 | Lpr repeat-containing protein         | 98.36 | 122  | BCG_1728c | lipoprotein lprJ                   | 58.41 | 127  | MAP1397c | hypothetical protein                    | 222  | 100   |
| MAPA_2449 | tyrosyl-RNA synthetase                                 | 421  | Rv1689  | Probable tyrosyl-RNA synthetase        | 86.76 | 424  | Mb1715c  | tyrosyl-RNA synthetase           | 86.76 | 424  | MbV_3082 | tyrosyl-RNA synthetase                | 99.52 | 421  | BCG_1727c | tyrosyl-RNA synthetase             | 86.76 | 424  | MAP1396c | tyrosyl-RNA synthetase                  | 421  | 100   |
| MAPA_2450 | 3-methyladenine DNA glycosylase                        | 425  | Rv1688  | Possible 3-methyladenine DNA glyco     | 79.1  | 203  | Mb1714c  | 3-methyladenine DNA glycosyl     | 79.1  | 203  | MbV_3083 | 3-methyladenine DNA glycosylase       | 99.51 | 212  | BCG_1746c | 3-methyladenine DNA glycosyl       | 79.1  | 203  | MAP1395c | 3-methyladenine DNA glycosylase         | 425  | 100   |
| MAPA_2451 | putative ammonium transporter                          | 476  | Rv1687  | Probable ammonium transporter          | 47.76 | 477  | Mb1713c  | ammonium transporter             | 47.76 | 477  | MbV_3084 | ammonium transporter                  | 99.06 | 425  | BCG_2941c | ammonium-transport integr          | 47.76 | 477  | MAP1394c | Amt 1                                   | 425  | 100   |
| MAPA_2452 | ABC transporter ATP-binding protein                    | 253  | Rv1686c | Probable conserved ATP-binding pr      | 75.5  | 255  | Mb1712c  | ABC transporter ATP-binding      | 75.5  | 255  | MbV_3085 | ABC transporter ATP-binding prot      | 99.21 | 253  | BCG_1725c | ABC transporter ATP-binding p      | 75.5  | 255  | MAP1393c | hypothetical protein                    | 253  | 100   |
| MAPA_2453 | hypothetical protein                                   | 226  | Rv1685c | Probable conserved integral membr      | 88.44 | 226  | Mb1711c  | integral membrane protein A      | 88.44 | 226  | MbV_3086 | efflux ABC transporter                | 98.67 | 228  | BCG_1724c | integral membrane protein AB       | 88.44 | 226  | MAP1392c | hypothetical protein                    | 226  | 100   |
| MAPA_2454 | Transcriptional regulator, TetR family                 | 207  | Rv1684c | hypothetical protein                   | 77.03 | 207  | Mb1710c  | hypothetical protein             | 77.03 | 207  | MbV_3087 | hypothetical protein                  | 99.5  |      |           |                                    |       |      |          |                                         |      |       |

Table S1 continued

|           |                                                      |       |         |                                              |                          |       |         |                                         |                          |       |          |                                             |                          |     |           |                                           |                          |       |          |                                           |                          |       |     |
|-----------|------------------------------------------------------|-------|---------|----------------------------------------------|--------------------------|-------|---------|-----------------------------------------|--------------------------|-------|----------|---------------------------------------------|--------------------------|-----|-----------|-------------------------------------------|--------------------------|-------|----------|-------------------------------------------|--------------------------|-------|-----|
| MAP4_2506 | hypothetical protein                                 | 525   | Rv1633c | Probable mannosyltransferase PrbA            | 68.45                    | 556   | MB1633c | hypothetical protein                    | 68.45                    | 556   | MAM_3138 | hypothetical protein                        | 99                       | 498 | BCG_1673c | hypothetical protein                      | 68.45                    | 556   | MAP1336c | hypothetical protein                      | 616                      | 100   |     |
| MAP4_2509 | Mg2+ transporter ATPase C mgcT                       | 240   | Rv1811  | Possible Mg2+ transporter P-type ATPase      | 39.23                    | 234   | MB1841  | Mg2+ transporter P-type ATPase          | 39.23                    | 234   | MAM_3139 | Mg2+ transporter C (MgC) family             | 100                      | 240 | BCG_1845  | Mg2+ transporter                          | 39.23                    | 234   | MAP1337c | hypothetical protein                      | 240                      | 100   |     |
| MAP4_2510 | Drug efflux membrane protein                         | 356   | Rv1534  | Possible drug efflux membrane protein        | 47.91                    | 471   | MB1534  | Drug efflux membrane protein            | 47.91                    | 471   | MAM_3140 | Drug efflux membrane protein                | 99                       | 472 | BCG_1672c | Drug efflux membrane protein              | 68.94                    | 471   | MAP1338c | hypothetical protein                      | 356                      | 100   |     |
| MAP4_2511 | enolchalcone ABC subunit B                           | 272   | Rv1633  | Probable enolchalcone ABC subunit B          | 62.99                    | 644   | MB1659  | enolchalcone ABC subunit B              | 62.99                    | 644   | MAM_3141 | enolchalcone ABC subunit B                  | 99                       | 626 | BCG_1671c | enolchalcone ABC subunit B                | 64.7                     | 698   | MAP1335c | hypothetical protein                      | 272                      | 100   |     |
| MAP4_2512 | Hypothetical protein                                 | 168   | Rv3082c | Virulence-regulating transcriptional         | 42.31                    | 340   | MB3102c | virulence-regulating transcript         | 42.31                    | 340   | MAM_3142 | hypothetical protein                        | 99.4                     | 168 | BCG_1307c | virulence-regulating transcript           | 42.31                    | 340   | MAP1334c | hypothetical protein                      | 115                      | 100   |     |
| MAP4_2513 | Hypothetical protein                                 | 261   | Rv2077c | Possible conserved transmembrane             | 47.5                     | 323   | MB2102c | transmembrane protein                   | 47.5                     | 323   | MAM_3143 | hypothetical protein                        | 97.03                    | 353 | BCG_2095c | hypothetical protein                      | 47.5                     | 323   | MAP1333c | hypothetical protein                      | 261                      | 100   |     |
| MAP4_2514 | Hypothetical protein                                 | 102   | Rv2541  | Hypothetical alanine rich protein            | 41.49                    | 135   | MB2570  | hypothetical protein                    | 41.49                    | 135   | MAM_3144 | hypothetical protein                        | 93.26                    | 89  | BCG_2563  | hypothetical protein                      | 41.49                    | 135   | MAP1218c | hypothetical protein                      | 97                       | 39.58 |     |
| MAP4_2515 | Arched-membrane serine/threonine kinase P            | 694   | Rv1371  | Arched-membrane serine/threonine kinase      | 63.7                     | 476   | MB1375  | Arched-membrane serine/threonine kinase | 63.7                     | 476   | MAM_3145 | Arched-membrane serine/threonine kinase     | 69.4                     | 693 | BCG_1785  | Arched-membrane serine/threonine kinase   | 63.7                     | 476   | MAP1332c | hypothetical protein                      | 630                      | 99.84 |     |
| MAP4_2516 | transmembrane ABC transporter, ATP-binding protein   | 191   | Rv1747  | Probable conserved transmembrane             | 62.4                     | 865   | MB1776  | ABC transporter ATP-binding             | 62.2                     | 865   | MAM_3146 | ABC transporter ATP-binding protein         | 98.93                    | 840 | BCG_1786  | transmembrane ABC transporter             | 62.2                     | 865   | MAP1331c | hypothetical protein                      | 864                      | 100   |     |
| MAP4_2517 | Hypothetical protein                                 | 654   | Rv1632c | Hypothetical protein                         | 83.33                    | 147   | MB1658c | hypothetical protein                    | 83.33                    | 147   | MAM_3147 | hypothetical protein                        | 99.35                    | 154 | BCG_1670c | hypothetical protein                      | 83.33                    | 147   | MAP1330c | hypothetical protein                      | 184                      | 100   |     |
| MAP4_2518 | ATP-dependent DNA ligase                             | 332   | Rv0938  | ATP-dependent DNA ligase LigI (DAT)          | 35.46                    | 759   | MB0963  | ATP-dependent DNA ligase                | 35.46                    | 759   | MAM_3148 | DNA polymerase LigI ligase subunit          | 99.4                     | 332 | BCG_0992  | ATP-dependent DNA ligase                  | 35.46                    | 759   | MAP1329c | hypothetical protein                      | 354                      | 99.7  |     |
| MAP4_2519 | formamidyrylimine-DNA glycosylase                    | 262   | Rv2924c | Probable formamidyrylimine-DNA glycosylase   | 34.36                    | 289   | MB2949c | formamidyrylimine-DNA glycosylase       | 34.36                    | 289   | MAM_3149 | formamidyrylimine-DNA glycosylase           | 98.85                    | 262 | BCG_2946c | formamidyrylimine-DNA glycosylase         | 34.36                    | 289   | MAP1328c | hypothetical protein                      | 262                      | 100   |     |
| MAP4_2520 | Hypothetical protein                                 | 137   | Rv3709c | Aspartate kinase Ask (aspartate kinase)      | 28.57                    | 421   | MB3706c | aspartate kinase                        | 28.57                    | 421   | MAM_3150 | hypothetical protein                        | 100                      | 137 | BCG_3709c | aspartate kinase                          | 28.57                    | 421   | MAP1327c | hypothetical protein                      | 137                      | 100   |     |
| MAP4_2521 | dehydroCoA kinase CoA                                | 402   | Rv1531  | Probable dehydroCoA kinase CoA               | 77.4                     | 407   | MB1557  | dehydroCoA kinase/protein fork          | 77.4                     | 407   | MAM_3151 | hypothetical protein                        | 99.51                    | 407 | BCG_1669  | dehydroCoA kinase/protein fork            | 77.4                     | 407   | MAP1326c | hypothetical protein                      | 407                      | 100   |     |
| MAP4_2522 | 30S ribosomal protein S1 RpsA                        | 96.67 | 481     | MB1655                                       | 30S ribosomal protein S1 | 96.67 | 481     | MB1655                                  | 30S ribosomal protein S1 | 96.67 | 481      | MAM_3152                                    | 30S ribosomal protein S1 | 100 | 480       | BCG_1668                                  | 30S ribosomal protein S1 | 96.67 | 481      | MAP1325c                                  | 30S ribosomal protein S1 | 187   | 100 |
| MAP4_2523 | diacylglycerol                                       | 508   | Rv0913c | Possible diacylglycerol                      | 27.22                    | 502   | MB0937c | diacylglycerol                          | 27.22                    | 502   | MAM_3153 | retinal pigment epithelial membrane protein | 99.01                    | 503 | BCG_0965c | diacylglycerol                            | 27.22                    | 502   | MAP1324c | hypothetical protein                      | 508                      | 100   |     |
| MAP4_2524 | Transcriptional regulator, TetR family               | 209   | Rv2028  | Probable transcriptional regulatory          | 25.48                    | 228   | MB2323  | TetR family transcriptional regulator   | 25.48                    | 228   | MAM_3154 | TetR family transcriptional regulator       | 99.04                    | 209 | BCG_3234  | TetR family transcriptional regulator     | 25.48                    | 228   | MAP1323c | hypothetical protein                      | 209                      | 100   |     |
| MAP4_2525 | DNA polymerase I                                     | 919   | Rv1629  | Probable DNA polymerase I P0iA               | 87.14                    | 904   | MB1655  | DNA polymerase I                        | 87.14                    | 904   | MAM_3155 | DNA polymerase I                            | 99.56                    | 913 | BCG_1667  | DNA polymerase I                          | 87.14                    | 904   | MAP1322  | DNA polymerase I                          | 919                      | 100   |     |
| MAP4_2526 | Hypothetical protein                                 | 146   | Rv1628c | Hypothetical protein                         | 80.56                    | 163   | MB1654c | hypothetical protein                    | 80.56                    | 163   | MAM_3156 | hypothetical protein                        | 100                      | 146 | BCG_1666c | hypothetical protein                      | 80.56                    | 163   | MAP1321c | hypothetical protein                      | 146                      | 100   |     |
| MAP4_2527 | nonspecific lipid-transfer protein                   | 404   | Rv1627c | Probable nonspecific lipid-transfer protein  | 91.44                    | 402   | MB1653c | lipid-transfer protein                  | 91.44                    | 402   | MAM_3157 | lipid-transfer protein                      | 100                      | 404 | BCG_1665c | lipid-transfer protein                    | 91.44                    | 402   | MAP1320c | lipid-transfer protein                    | 404                      | 100   |     |
| MAP4_2528 | two-component system transcriptional regulator       | 207   | Rv1626  | Probable two-component system trans          | 93.14                    | 205   | MB1652  | two-component system trans              | 93.14                    | 205   | MAM_3158 | response regulator                          | 99.52                    | 207 | BCG_1664  | two-component system trans                | 93.14                    | 205   | MAP1319  | hypothetical protein                      | 207                      | 100   |     |
| MAP4_2529 | Adenylyl cyclase                                     | 443   | Rv1825c | Membrane-anchored adenylyl cyclase           | 71.78                    | 443   | MB1825c | adenylyl cyclase                        | 71.78                    | 443   | MAM_3162 | adenylyl cyclase                            | 99.1                     | 443 | BCG_1663c | membrane-anchored adenylyl cyclase        | 71.78                    | 443   | MAP1318c | hypothetical protein                      | 443                      | 100   |     |
| MAP4_2530 | Hypothetical protein                                 | 197   | Rv1624c | Probable conserved membrane protein          | 40.1                     | 195   | MB1650c | hypothetical protein                    | 40.1                     | 195   | MAM_3163 | hypothetical protein                        | 99.44                    | 180 | BCG_1662c | hypothetical protein                      | 40.1                     | 195   | MAP1317c | hypothetical protein                      | 197                      | 100   |     |
| MAP4_2531 | membrane cytochrome D ubiquinol oxidase subunit I c  | 490   | Rv1623c | Probable integral membrane cytoch            | 79.59                    | 485   | MB1649c | integral membrane cytochrome            | 79.59                    | 485   | MAM_3164 | cytochrome D ubiquinol oxidase subunit I    | 99.18                    | 490 | BCG_1661c | integral membrane cytochrome              | 79.59                    | 485   | MAP1316c | hypothetical protein                      | 490                      | 100   |     |
| MAP4_2532 | membrane cytochrome D ubiquinol oxidase subunit II c | 346   | Rv1622c | Probable integral membrane cytoch            | 82.85                    | 346   | MB1648c | integral membrane cytochrome            | 82.85                    | 346   | MAM_3165 | cytochrome D ubiquinol oxidase subunit II   | 99.71                    | 346 | BCG_1660c | integral membrane cytochrome              | 82.85                    | 346   | MAP1315c | CyD8                                      | 346                      | 100   |     |
| MAP4_2533 | transmembrane ATP-binding protein ABC transporter c  | 532   | Rv1621c | Probable component linked with transmembrane | 77.38                    | 527   | MB1647c | cytochrome assembly ABC trans           | 77.38                    | 527   | MAM_3166 | cytochrome assembly ABC trans               | 98.12                    | 540 | BCG_1659c | cytochrome assembly ABC trans             | 77.38                    | 527   | MAP1314c | CyD8                                      | 532                      | 100   |     |
| MAP4_2534 | transmembrane ATP-binding protein ABC transporter c  | 532   | Rv1620c | Probable component linked with transmembrane | 73.74                    | 527   | MB1646c | cytochrome assembly ABC trans           | 73.74                    | 527   | MAM_3167 | ABC transporter ATP-binding protein         | 97.49                    | 560 | BCG_1658c | cytochrome assembly ABC trans             | 73.74                    | 527   | MAP1313c | CyD8                                      | 565                      | 99.82 |     |
| MAP4_2537 | Acyl-CoA thioesterase II                             | 300   | Rv1619c | Probable acyl-CoA thioesterase               | 83.45                    | 300   | MB1645c | Acyl-CoA thioesterase                   | 83.45                    | 300   | MAM_3168 | Acyl-CoA thioesterase                       | 98.83                    | 300 | BCG_1657c | Acyl-CoA thioesterase II                  | 83.45                    | 300   | MAP1312c | Acyl-CoA thioesterase                     | 300                      | 100   |     |
| MAP4_2538 | Pyruvate kinase                                      | 472   | Rv1617  | Probable pyruvate kinase PfkA                | 91.31                    | 472   | MB1643  | pyruvate kinase                         | 91.31                    | 472   | MAM_3170 | hypothetical protein                        | 99.78                    | 457 | BCG_1656  | pyruvate kinase                           | 91.31                    | 472   | MAP1310  | pyruvate kinase                           | 472                      | 100   |     |
| MAP4_2539 | hypothetical protein                                 | 139   | Rv1616  | Hypothetical protein                         | 64.84                    | 132   | MB1642  | hypothetical protein                    | 64.84                    | 132   | MAM_3171 | hypothetical protein                        | 96.58                    | 117 | BCG_1655  | hypothetical protein                      | 64.84                    | 132   | MAP1309  | hypothetical protein                      | 139                      | 100   |     |
| MAP4_2540 | prolipoprotein diacylglyceryl transferase            | 427   | Rv1614  | Probable prolipoprotein diacylglyceryl       | 59.17                    | 468   | MB1640  | prolipoprotein diacylglyceryl           | 59.17                    | 468   | MAM_3172 | prolipoprotein diacylglyceryl transferase   | 84.77                    | 440 | BCG_1652  | prolipoprotein diacylglyceryl transferase | 59.17                    | 468   | MAP1308  | prolipoprotein diacylglyceryl transferase | 427                      | 100   |     |
| MAP4_2541 | tryptophan synthase alpha chain                      | 271   | Rv1613  | Probable tryptophan synthase subunit alpha   | 85.66                    | 270   | MB1639  | tryptophan synthase subunit alpha       | 85.66                    | 270   | MAM_3173 | tryptophan synthase subunit alpha           | 98.26                    | 271 | BCG_1651  | tryptophan synthase subunit alpha         | 85.66                    | 270   | MAP1307  | tryptophan synthase subunit alpha         | 271                      | 100   |     |
| MAP4_2542 | tryptophan synthase beta chain                       | 447   | Rv1612c | Probable tryptophan synthase subunit beta    | 87.01                    | 444   | MB1638  | tryptophan synthase subunit beta        | 87.01                    | 444   | MAM_3174 | tryptophan synthase subunit beta            | 99.20                    | 420 | BCG_1650  | tryptophan synthase subunit beta          | 87.01                    | 444   | MAP1306  | tryptophan synthase subunit beta          | 447                      | 100   |     |
| MAP4_2543 | inhibitor-3-glycerol-phosphate synthase              | 272   | Rv1611  | Probable inhibitor-3-glycerol-phosphat       | 88.13                    | 272   | MB1637  | inhibitor-3-glycerol-phosphate synth    | 88.13                    | 272   | MAM_3175 | inhibitor-3-glycerol-phosphate synth        | 100                      | 272 | BCG_1649  | inhibitor-3-glycerol-phosphate synth      | 88.13                    | 272   | MAP1305c | inhibitor-3-glycerol-phosphate synthase   | 272                      | 100   |     |
| MAP4_2544 | hypothetical protein                                 | 143   | Rv1610  | Probable conserved membrane protein          | 74.4                     | 235   | MB1636  | hypothetical protein                    | 74.4                     | 235   | MAM_3176 | hypothetical protein                        | 97.83                    | 226 | BCG_1648  | hypothetical protein                      | 74.4                     | 235   | MAP1304c | hypothetical protein                      | 143                      | 100   |     |
| MAP4_2545 | anthranilate synthase component I                    | 88.5  | Rv1609  | Anthranilate synthase component I            | 88.5                     | 516   | MB1635  | anthranilate synthase compo             | 88.5                     | 516   | MAM_3177 | anthranilate synthase component I           | 99.8                     | 510 | BCG_1647  | anthranilate synthase compo               | 88.5                     | 516   | MAP1303c | anthranilate synthase component I         | 510                      | 100   |     |
| MAP4_2546 | peroxidin CoxB                                       | 155   | Rv1608c | Probable peroxidin CoxB                      | 84.67                    | 154   | MB1634c | peroxidin coxB                          | 84.67                    | 154   | MAM_3178 | antioxidant AhpC/TrsA family protein        | 99.34                    | 152 | BCG_1646c | peroxidin coxB                            | 84.67                    | 154   | MAP1302c | BcpB                                      | 155                      | 99.35 |     |
| MAP4_2547 | ionix transporter integral membrane protein chaA     | 78.43 | Rv1607  | Probable ionix transporter integral m        | 78.43                    | 360   | MB1633  | ionix transporter integral mem          | 78.43                    | 360   | MAM_3179 | ionix transporter integral mem              | 99.18                    | 368 | BCG_1645  | ionix transporter integral mem            | 78.43                    | 360   | MAP1301  | ChaA                                      | 369                      | 100   |     |
| MAP4_2548 | phosphoribosyl-AMP cyclohydrolase                    | 115   | Rv1606  | Probable phosphoribosyl-AMP cyclohy          | 88.7                     | 115   | MB1632  | phosphoribosyl-AMP cyclohydrol          | 88.7                     | 115   | MAM_3180 | phosphoribosyl-AMP cyclohydrolase           | 99.28                    | 115 | BCG_1644  | phosphoribosyl-AMP cyclohydrol            | 88.7                     | 115   | MAP1300  | phosphoribosyl-AMP cyclohydrolase         | 115                      | 100   |     |
| MAP4_2549 | imidazole glycerol-phosphate synthase                | 265   | Rv1605  | Probable imidazole glycerol-phosphat         | 89.23                    | 267   | MB1631  | imidazole glycerol phosphate synth      | 89.23                    | 267   | MAM_3181 | imidazole glycerol phosphate synth          | 99.62                    | 265 | BCG_1643  | imidazole glycerol phosphate synth        | 89.23                    | 267   | MAP1299  | imidazole glycerol-phosphate synthase     | 265                      | 100   |     |
| MAP4_2550 | inositol-monophosphatase                             | 266   | Rv1604  | Probable inositol-monophosphatase            | 77.47                    | 270   | MB1630  | inositol-monophosphatase                | 77.47                    | 270   | MAM_3182 | inositol monophosphatase                    | 99.25                    | 266 | BCG_1642  | inositol-monophosphatase im               | 77.47                    | 270   | MAP1298  | ImpA                                      | 266                      | 100   |     |
| MAP4_2551 | phosphoribosylformimino-5-aminimidazolecarboxam      | 243   | Rv1603  | Probable phosphoribosylformimino             | 91.67                    | 245   | MB1629  | phosphoribosyl isomerase A              | 91.67                    | 245   | MAM_3183 | phosphoribosyl isomerase A                  | 99.18                    | 243 | BCG_1641  | phosphoribosyl isomerase A                | 91.67                    | 245   | MAP1297  | phosphoribosyl isomerase A                | 243                      | 100   |     |
| MAP4_2552 | imidazole glycerol-phosphate synthase                | 206   | Rv1602  | Probable imidazole glycerol-phosphat         | 79.61                    | 206   | MB1628  | imidazole glycerol-phosphate synth      | 79.61                    | 206   | MAM_3184 | imidazole glycerol-phosphate synth          | 99.51                    | 206 | BCG_1640  | imidazole glycerol-phosphate synth        | 79.61                    | 206   | MAP1296  | imidazole glycerol phosphate synthase     | 206                      | 100   |     |
| MAP4_2553 | imidazole glycerol-phosphate dehydratase HisB        | 207   | Rv1601  | Probable imidazole glycerol-phosphat         | 88.13                    | 210   | MB1627  | imidazole glycerol-phosphate dehyd      | 88.13                    | 210   | MAM_3185 | imidazole glycerol-phosphate dehyd          | 100                      | 207 | BCG_1639  | imidazole glycerol-phosphate dehyd        | 88.13                    | 210   | MAP1295  | imidazole glycerol-phosphate dehydratase  | 207                      | 100   |     |
| MAP4_2554 | histidinol-phosphate aminotransferase                | 398   | Rv1600  | Probable histidinol-phosphate amin           | 86.61                    | 380   | MB1626  | histidinol-phosphate aminotr            | 86.61                    | 380   | MAM_3186 | histidinol-phosphate aminotransf            | 99.5                     | 398 | BCG_1638  | histidinol-phosphate aminotr              | 86.61                    | 380   | MAP1294  | histidinol-phosphate aminotransferase     | 398                      | 100   |     |
| MAP4_2555 | histidinol dehydrogenase                             | 467   | Rv1599  | Probable histidinol dehydrogenase            | 84.55                    | 438   | MB1625  | histidinol dehydrogenase                | 84.55                    | 438   | MAM_3187 | histidinol dehydrogenase                    | 99.57                    | 467 | BCG_1637  | histidinol dehydrogenase                  | 84.55                    | 438   | MAP1293  | histidinol dehydrogenase                  | 467                      | 100   |     |
| MAP4_2556 | hypothetical protein                                 | 137   | Rv1598c | Hypothetical protein                         | 79.91                    | 136   | MB1624c | hypothetical protein                    | 79.91                    | 136   | MAM_3188 | hypothetical protein                        | 99.27                    | 137 |           |                                           |                          |       |          |                                           |                          |       |     |

Table S1 continued

|           |                                                    |     |         |                                       |       |      |         |                               |                      |       |         |                                      |                           |       |           |                                |                      |       |          |                          |                      |       |     |
|-----------|----------------------------------------------------|-----|---------|---------------------------------------|-------|------|---------|-------------------------------|----------------------|-------|---------|--------------------------------------|---------------------------|-------|-----------|--------------------------------|----------------------|-------|----------|--------------------------|----------------------|-------|-----|
| MAP4_2611 | membrane protein, Mmp5 family                      | 139 | Rv0451c | Probable conserved membrane prot      | 59.42 | 140  | Mv0459c | hypothetical protein          | 59.42                | 140   | Mv0459c | membrane protein mmp54               | 59.42                     | 139   | BCG_0490c | membrane protein mmp54         | 59.42                | 140   | MAP1241c | hypothetical protein     | 193                  | 100   |     |
| MAP4_2612 | transmembrane transport protein Mmp4L              | 163 | Rv0450c | Probable conserved transmembran       | 61.75 | 167  | Mv0458c | transmembrane transport pr    | 61.64                | 167   | Mv0458c | transmembrane transport pr           | 61.64                     | 167   | BCG_0489c | transmembrane transport pro    | 61.75                | 167   | MAP1240c | hypothetical protein     | 193                  | 100   |     |
| MAP4_2613 | membrane transport protein Mmp4L                   | 972 | Rv0450c | Probable conserved transmembran       | 65.67 | 967  | Mv0458c | transmembrane transport pr    | 65.56                | 967   | Mv0458c | transmembrane transport pr           | 65.56                     | 967   | BCG_0489c | transmembrane transport pro    | 65.67                | 967   | MAP1239c | hypothetical protein     | 192                  | 100   |     |
| MAP4_2614 | daunorubicin-DIM-transport ATP-binding protein ABC | 216 | Rv2936  | Probable transmembrane transport      | 54.37 | 311  | Mv2961  | daunorubicin-DIM-transport    | 54.37                | 311   | Mv03250 | daunorubicin-DIM-transport           | 54.37                     | 311   | BCG_2958  | daunorubicin-DIM-transport A   | 54.37                | 311   | MAP1238c | hypothetical protein     | 202                  | 100   |     |
| MAP4_2615 | daunorubicin-dim-transport integrin                | 246 | Rv2937  | Daunorubicin-dim-transport integra    | 33    | 289  | Mv2962  | daunorubicin-DIM-transport    | 33                   | 289   | Mv03251 | ABC transporter efflux protein, Drr  | 83.33                     | 246   | BCG_2959  | daunorubicin-DIM-transport     | 33                   | 289   | MAP1237c | hypothetical protein     | 246                  | 100   |     |
| MAP4_2616 | daunorubicin-dim-transport membrane protein ABC tr | 263 | Rv2938  | Probable daunorubicin-dim-transport   | 33.06 | 276  | Mv2963  | daunorubicin-DIM-transport    | 33.06                | 276   | Mv03252 | daunorubicin resistance protein, Drr | 83.37                     | 264   | BCG_2960  | daunorubicin-DIM-transport     | 33.06                | 276   | MAP1236c | hypothetical protein     | 243                  | 100   |     |
| MAP4_2617 | putative acyltransferase                           | 444 | Rv0111  | Possible transmembrane acyltransfer   | 35.71 | 685  | Mv0115  | transmembrane acyltransfer    | 35.71                | 685   | Mv03274 | acyltransferase                      | 56.43                     | 387   | BCG_0144  | acyltransferase                | 35.71                | 685   | MAP1235c | hypothetical protein     | 464                  | 100   |     |
| MAP4_2618 | putative glyoxyltransferase                        | 206 | Rv2957  | Possible glyoxyl transferase          | 68.78 | 275  | Mv2961  | glyoxyl transferase family pr | 68.78                | 275   | Mv03263 | glyoxyl transferase family pr        | 68.78                     | 275   | BCG_2978  | glyoxyl transferase family pr  | 68.78                | 275   | MAP1234c | hypothetical protein     | 266                  | 100   |     |
| MAP4_2619 | hypothetical protein                               | 340 | Rv2956  | hypothetical protein                  | 61.37 | 243  | Mv2960  | hypothetical protein          | 66.26                | 243   | Mv1133  | hypothetical protein F4M             | 28.39                     | 264   | BCG_2977  | hypothetical protein           | 66.26                | 243   | MAP1233c | hypothetical protein     | 207                  | 100   |     |
| MAP4_2620 | nucleotide-sugar epimerase ePiA                    | 320 | Rv1120  | Probable nucleotide-sugar epimeras    | 28.08 | 314  | Mv0558  | UDP-glucose 4-epimerase       | 28.08                | 314   | Mv05254 | nucleotide-diphosphate-sugar ep      | 27.76                     | 313   | BCG_3692U | UDP-glucose 4-epimerase        | 28.08                | 314   | MAP1232c | hypothetical protein     | 320                  | 100   |     |
| MAP4_2621 | GDP-D-mannose dehydratase GmdA                     | 43  | Rv1511  | GDP-D-mannose dehydratase GmdA        | 89.05 | 340  | Mv0116  | GDP-mannose 4,6-dehydratase   | 27.59                | 318   | Mv04406 | UDP-glucose 4,6-dehydratase          | 29.08                     | 311   | BCG_0145  | GDP-mannose 4,6-dehydratase    | 27.59                | 318   | MAP1231c | hypothetical protein     | 343                  | 100   |     |
| MAP4_2622 | hypothetical protein                               | 306 | Rv1075c | Conserved exported protein            | 28.04 | 314  | Mv0110c | hypothetical protein          | 28.04                | 314   | Mv03273 | hypothetical protein                 | 96.56                     | 309   | BCG_1133c | hypothetical protein           | 28.04                | 314   | MAP1230c | hypothetical protein     | 406                  | 100   |     |
| MAP4_2623 | Esterase                                           | 478 | Rv1497  | Probable esterase LgtA                | 77.16 | 429  | Mv1334  | esterase lgtA                 | 77.16                | 429   | Mv03276 | hypothetical protein                 | 99.53                     | 426   | BCG_1560  | esterase lgtA                  | 77.16                | 429   | MAP1228c | hypothetical protein     | 438                  | 100   |     |
| MAP4_2624 | arginine/ornithine transport system ATPase         | 336 | Rv1496  | Possible transport system kinase      | 82.55 | 334  | Mv1513  | arginine/ornithine transport  | 82.55                | 334   | Mv03277 | hypothetical protein                 | 99.39                     | 326   | BCG_1559  | arginine/ornithine transport s | 82.55                | 334   | MAP1227c | hypothetical protein     | 428                  | 100   |     |
| MAP4_2627 | methylmalonyl-CoA mutase large subunit mutB        | 750 | Rv1492  | Probable methylmalonyl-CoA mutase     | 70.79 | 750  | Mv0390  | methylmalonyl-CoA mutase      | 90.79                | 750   | Mv03276 | methylmalonyl-CoA mutase             | 100                       | 750   | BCG_1556  | methylmalonyl-CoA mutase       | 70.79                | 750   | MAP1226c | methylmalonyl-CoA mutase | 750                  | 100   |     |
| MAP4_2628 | methylmalonyl-CoA mutase small subunit mutA        | 750 | Rv1492  | Probable methylmalonyl-CoA mutase     | 74.88 | 615  | Mv0129c | methylmalonyl-CoA mutase      | 74.88                | 615   | Mv03276 | methylmalonyl-CoA mutase, small      | 98.88                     | 625   | BCG_1555  | methylmalonyl-CoA mutase s     | 74.88                | 615   | MAP1225c | hypothetical protein     | 625                  | 100   |     |
| MAP4_2629 | hypothetical protein                               | 628 | Rv1491c | hypothetical protein                  | 64.17 | 252  | Mv0128c | hypothetical protein          | 64.17                | 252   | Mv03279 | hypothetical protein                 | 99.22                     | 255   | BCG_1554c | hypothetical protein           | 64.17                | 252   | MAP1224c | hypothetical protein     | 258                  | 100   |     |
| MAP4_2630 | hypothetical protein                               | 329 | Rv1491c | hypothetical protein                  | 28.47 | 221  | Mv0184c | hypothetical protein          | 28.47                | 221   | Mv03280 | hypothetical protein                 | 98.48                     | 429   | BCG_1849  | hypothetical protein           | 28.47                | 221   | MAP1223c | hypothetical protein     | 270                  | 99.68 |     |
| MAP4_2631 | two component system sensor kinase phoR            | 480 | Rv0758  | Possible two component system resp    | 35.07 | 485  | Mv0781  | two component system resp     | 35.07                | 485   | Mv03281 | hypothetical protein                 | 96.5                      | 484   | BCG_0810  | hypothetical protein           | 35.07                | 485   | MAP1222c | hypothetical protein     | 210                  | 99.68 |     |
| MAP4_2632 | two component response transcriptional regulator   | 240 | Rv0981  | Mycobacterial persistence regulato    | 41.7  | 228  | Mv01007 | two component response tra    | 41.7                 | 228   | Mv03283 | two component system response r      | 99.58                     | 239   | BCG_0816  | two component system respon    | 41.7                 | 228   | MAP1221c | hypothetical protein     | 219                  | 99.54 |     |
| MAP4_2633 | hypothetical protein                               | 111 | Rv2537c | 3-dehydroquinate dehydratase AroU     | 46.67 | 147  | Mv2566c | 3-dehydroquinate dehydrat     | 46.67                | 147   | Mv03284 | hypothetical protein                 | 99.11                     | 118   | BCG_2559c | 3-dehydroquinate dehydrat      | 46.67                | 147   | MAP1220c | hypothetical protein     | 111                  | 100   |     |
| MAP4_2634 | hypothetical protein                               | 172 | Rv1261c | hypothetical protein                  | 29.8  | 149  | Mv0129c | hypothetical protein          | 29.8                 | 149   | Mv03285 | hypothetical protein                 | 96.82                     | 175   | BCG_1320c | hypothetical protein           | 29.8                 | 149   | MAP1219c | hypothetical protein     | 156                  | 99.36 |     |
| MAP4_2635 | hypothetical protein                               | 97  | Rv399c  | hypothetical protein                  | 33.33 | 110  | Mv0596c | hypothetical protein          | 29.73                | 33    | Mv03286 | hypothetical protein                 | 95.24                     | 83    | BCG_1909c | hypothetical protein           | 29.73                | 98    | MAP1218c | hypothetical protein     | 97                   | 100   |     |
| MAP4_2636 | hypothetical protein                               | 209 | Rv2077c | Possible conserved transmembrane      | 43.29 | 323  | Mv0210c | transmembrane protein         | 43.29                | 323   | Mv03287 | hypothetical protein                 | 95.24                     | 328   | BCG_2095c | hypothetical protein           | 43.29                | 323   | MAP1217c | hypothetical protein     | 259                  | 100   |     |
| MAP4_2637 | lipoprotein LpqQ                                   | 256 | Rv0835  | Possible lipoprotein LpqQ             | 38.62 | 214  | Mv0858  | lipoprotein LpqQ              | 38.62                | 214   | Mv03288 | LpqQ protein                         | 97.98                     | 99    | BCG_0887  | lipoprotein lpqQ               | 38.62                | 214   | MAP1216c | hypothetical protein     | 99                   | 98.99 |     |
| MAP4_2638 | hypothetical protein                               | 118 | Rv1489  | hypothetical protein                  | 72.03 | 118  | Mv0125c | hypothetical protein          | 72.03                | 118   | Mv03289 | hypothetical protein                 | 100                       | 118   | BCG_1551  | hypothetical protein           | 72.03                | 118   | MAP1215c | hypothetical protein     | 118                  | 100   |     |
| MAP4_2639 | putative exported conserved protein                | 377 | Rv1488  | Possible exported conserved protein   | 93.05 | 381  | Mv0124c | hypothetical protein          | 93.05                | 381   | Mv03290 | secreted protein                     | 99.73                     | 377   | BCG_1550  | hypothetical protein           | 93.05                | 381   | MAP1214c | hypothetical protein     | 377                  | 100   |     |
| MAP4_2640 | hypothetical protein                               | 145 | Rv1487  | hypothetical protein                  | 75.32 | 144  | Mv0123c | hypothetical protein          | 75.32                | 144   | Mv03291 | putative efficiency protein D (NK    | 98.61                     | 145   | BCG_1549  | hypothetical protein           | 75.32                | 144   | MAP1213c | hypothetical protein     | 147                  | 100   |     |
| MAP4_2641 | hypothetical protein                               | 322 | Rv1486c | hypothetical protein                  | 72.95 | 288  | Mv0122c | hypothetical protein          | 72.95                | 288   | Mv03292 | hypothetical protein                 | 97.35                     | 328   | BCG_1548c | hypothetical protein           | 72.95                | 322   | MAP1212c | hypothetical protein     | 322                  | 100   |     |
| MAP4_2642 | ferrochelatase HemZ                                | 336 | Rv1485  | Ferrochelatase HemZ (prothome h       | 81.49 | 344  | Mv0121  | ferrochelatase                | 81.49                | 344   | Mv03293 | ferrochelatase                       | 98.61                     | 336   | BCG_1547  | ferrochelatase                 | 81.49                | 344   | MAP1211c | ferrochelatase           | 336                  | 100   |     |
| MAP4_2643 | NADH-dependent enoyl-ACP reductase InhA            | 269 | Rv1484  | NADH-dependent enoyl-ACP reducta      | 89.22 | 269  | Mv0120  | enoyl-ACP reductase           | 89.22                | 269   | Mv03294 | enoyl-acyl carrier protein reducta   | 99.63                     | 269   | BCG_1546  | enoyl-ACP reductase            | 89.22                | 269   | MAP1210c | enoyl-ACP reductase      | 269                  | 100   |     |
| MAP4_2644 | 3-oxoacyl-ACP reductase                            | 255 | Rv1483  | 3-oxoacyl-acyl-carrier protein reduct | 83.92 | 247  | Mv0119  | 3-oxoacyl-ACP reductase       | 83.92                | 247   | Mv03295 | 3-oxoacyl-acyl-carrier-protein red   | 99.63                     | 255   | BCG_1545  | 3-oxoacyl-ACP reductase        | 83.92                | 247   | MAP1209c | hypothetical protein     | 255                  | 100   |     |
| MAP4_2645 | hypothetical protein                               | 476 | Rv0504  | hypothetical protein                  | 42.46 | 30   | Mv0118  | hypothetical protein          | 42.46                | 30    | Mv03296 | hypothoglycane 5 family protein      | 25.47                     | 486   | BCG_1544  | hypothetical protein           | 42.46                | 30    | MAP1208c | hypothetical protein     | 375                  | 100   |     |
| MAP4_2646 | hypothetical protein                               | 335 | Rv1481  | Probable membrane protein             | 91.64 | 335  | Mv0117  | hypothetical protein          | 91.64                | 335   | Mv03297 | hypothetical protein                 | 100                       | 335   | BCG_1543  | hypothetical protein           | 91.64                | 335   | MAP1207c | hypothetical protein     | 335                  | 100   |     |
| MAP4_2647 | hypothetical protein                               | 316 | Rv1480  | hypothetical protein                  | 88.64 | 317  | Mv0116  | hypothetical protein          | 88.64                | 317   | Mv03298 | hypothetical protein                 | 99.68                     | 316   | BCG_1542  | hypothetical protein           | 88.64                | 317   | MAP1206c | hypothetical protein     | 316                  | 100   |     |
| MAP4_2648 | transcriptional regulatory protein moxR1           | 380 | Rv1479  | Probable transcriptional regulatory   | 90.19 | 377  | Mv0115  | transcriptional regulator Mox | 90.19                | 377   | Mv03299 | MoxR protein                         | 100                       | 380   | BCG_1541  | transcriptional regulatory pr  | 90.19                | 377   | MAP1205c | hypothetical protein     | 380                  | 100   |     |
| MAP4_2649 | invasion-associated protein, NipCp60 Family        | 244 | Rv1478  | Possible invasion protein             | 77.87 | 241  | Mv0114  | invasion protein              | 77.87                | 241   | Mv03300 | Invasin I                            | 100                       | 244   | BCG_1540  | invasion protein               | 77.87                | 241   | MAP1204c | hypothetical protein     | 244                  | 100   |     |
| MAP4_2650 | invasion-associated protein, NipCp60 Family        | 479 | Rv1477  | Peptidoglycan hydrolase               | 78.57 | 472  | Mv0113  | invasion protein              | 78.57                | 472   | Mv03301 | invasion protein                     | 99.33                     | 450   | BCG_1539  | invasion protein               | 78.57                | 472   | MAP1203c | hypothetical protein     | 479                  | 100   |     |
| MAP4_2651 | hypothetical protein                               | 208 | Rv1476  | Possible membrane protein             | 79.63 | 186  | Mv0112  | hypothetical protein          | 79.63                | 186   | Mv03302 | hypothetical protein                 | 99.45                     | 181   | BCG_1538  | hypothetical protein           | 79.63                | 186   | MAP1202c | hypothetical protein     | 208                  | 100   |     |
| MAP4_2652 | iron-regulated aconitate hydratase acn             | 937 | Rv1475c | Probable iron-regulated aconitate h   | 88.54 | 943  | Mv0111c | aconitate hydratase           | 88.54                | 943   | Mv03303 | aconitate hydratase                  | 99.79                     | 937   | BCG_1537c | aconitate hydratase            | 88.54                | 943   | MAP1201c | aconitate hydratase      | 937                  | 100   |     |
| MAP4_2653 | Transcriptional regulator, TetR family             | 192 | Rv1474c | Probable transcriptional regulatory   | 91.44 | 187  | Mv0110c | transcriptional regulator     | 91.44                | 187   | Mv03305 | HTH-type transcriptional repressor   | 100                       | 192   | BCG_1536c | transcriptional regulatory pr  | 91.44                | 187   | MAP1200c | hypothetical protein     | 192                  | 100   |     |
| MAP4_2654 | putative transcriptional regulatory protein        | 65  | Rv1473A | Possible transcriptional regulatory   | 75.41 | 63   | Mv0109  | transcriptional regulator     | 79.31                | 63    | Mv03306 | hypothetical protein                 | 100                       | 65    | BCG_1535c | transcriptional regulatory pr  | 79.31                | 63    | MAP1199c | hypothetical protein     | 65                   | 100   |     |
| MAP4_2655 | marvelide ABC transporter ATP-binding protein      | 216 | Rv1473  | Probable marvelide transport ATP-b    | 80.33 | 216  | Mv0108  | marvelide ABC transporter A   | 80.33                | 216   | Mv03307 | ABC transporter ATP-binding pr       | 99.63                     | 216   | BCG_1534c | marvelide transport ATP-bind   | 80.33                | 216   | MAP1198c | hypothetical protein     | 216                  | 100   |     |
| MAP4_2656 | Enoyl-CoA hydratase EcbA13                         | 269 | Rv1472  | Possible enoyl-CoA hydratase EcbA     | 89.93 | 285  | Mv0107  | enoyl-CoA hydratase           | 89.93                | 285   | Mv03307 | enoyl-CoA hydratase                  | 99.63                     | 269   | BCG_1533  | enoyl-CoA hydratase            | 90.3                 | 285   | MAP1197c | enoyl-CoA hydratase      | 269                  | 100   |     |
| MAP4_2657 | thioredoxin                                        | 117 | Rv1471  | Probable thioredoxin TrxB1            | 78.18 | 123  | Mv0308  | thioredoxin                   | 78.18                | 123   | Mv03308 | thioredoxin                          | 100                       | 117   | BCG_1532  | thioredoxin trxB1              | 78.18                | 123   | MAP1196c | hypothetical protein     | 117                  | 100   |     |
| MAP4_2658 | acyl-CoA dehydrogenase FadE15                      | 609 | Rv1467c | Probable acyl-CoA dehydrogenase       | 84.4  | 609  | Mv0102c | acyl-CoA dehydrogenase        | 84.4                 | 609   | Mv03309 | acyl-CoA dehydrogenase               | 99.67                     | 609   | BCG_1528c | acyl-CoA dehydrogenase fadE    | 84.4                 | 609   | MAP1195c | acyl-CoA dehydrogenase   | 609                  | 100   |     |
| MAP4_2659 | hypothetical protein                               | 258 | Rv2946c | Probable polyketide synthase Pks1     | 35.71 | 1616 | 321     | Mv0101                        | hypothetical protein | 35.71 | 1616    | Mv03310                              | 7 kDa lipoprotein antigen | 99.63 | 258       | BCG_1527c                      | hypothetical protein | 35.71 | 1616     | MAP1194c                 | hypothetical protein | 258   | 100 |
| MAP4_2660 | hypothetical protein                               | 479 | Rv2929  | Probable conserved lipoprotein Lpq    | 37.93 | 321  | Mv0100  | lipoprotein LpqT              | 41.38                | 321   | Mv03311 | hypothetical protein                 | 99.63                     | 232   | BCG_2     |                                |                      |       |          |                          |                      |       |     |

Table S1 continued

|           |                                                             |       |         |                                                                 |                                                         |       |         |                                                                     |                                                           |       |         |                                                                     |                                                         |       |           |                                                                     |                                                         |       |         |                                                               |                                                         |       |       |
|-----------|-------------------------------------------------------------|-------|---------|-----------------------------------------------------------------|---------------------------------------------------------|-------|---------|---------------------------------------------------------------------|-----------------------------------------------------------|-------|---------|---------------------------------------------------------------------|---------------------------------------------------------|-------|-----------|---------------------------------------------------------------------|---------------------------------------------------------|-------|---------|---------------------------------------------------------------|---------------------------------------------------------|-------|-------|
| MAP4_2710 | hypothetical protein                                        | 111   | Rv174c  | Low molecular weight T-cell antigen                             | 37.84                                                   | 110   | MB1207c | hypothetical protein                                                | 37.84                                                     | 110   | MV_3362 | hypothetical protein                                                | 99.31                                                   | 112   | BCG_1237c | hypothetical protein                                                | 37.84                                                   | 110   | MAP143c | hypothetical protein                                          | 111                                                     | 100   |       |
| MAP4_2711 | hypothetical protein                                        | 154   | Rv1417  | Possible conserved membrane protein                             | 78.23                                                   | 154   | MB1452  | hypothetical protein                                                | 78.23                                                     | 154   | MV_3363 | hypothetical protein                                                | 99.35                                                   | 112   | BCG_1478  | hypothetical protein                                                | 78.23                                                   | 154   | MAP142  | hypothetical protein                                          | 154                                                     | 100   |       |
| MAP4_2712 | riboflavin synthase beta chain ribA                         | 61.98 | Rv1416  | Possible riboflavin synthase beta chain                         | 61.98                                                   | 160   | MB1453  | 6,7-dimethyl-8-ribityllumazine synthase                             | 62.47                                                     | 164   | MV_3364 | 6,7-dimethyl-8-ribityllumazine synthase                             | 98.53                                                   | 144   | BCG_1479  | 6,7-dimethyl-8-ribityllumazine synthase                             | 61.98                                                   | 160   | MAP141  | 6,7-dimethyl-8-ribityllumazine synthase                       | 60                                                      | 100   |       |
| MAP4_2713 | riboflavin synthase protein ribA2                           | 66.71 | Rv1415  | Possible riboflavin synthase alpha chain                        | 66.71                                                   | 425   | MB1450  | bifunctional 3,4-dihydroxy-2-butanone 3-phosphate 3-epimerase       | 66.71                                                     | 425   | MV_3365 | bifunctional 3,4-dihydroxy-2-butanone 3-phosphate 3-epimerase       | 99.53                                                   | 425   | BCG_1476  | bifunctional 3,4-dihydroxy-2-butanone 3-phosphate 3-epimerase       | 66.71                                                   | 425   | MAP140  | bifunctional 3,4-dihydroxy-2-butanone 3-phosphate 3-epimerase | 425                                                     | 100   |       |
| MAP4_2714 | Riboflavin synthase alpha chain                             | 84.77 | 201     | MAP1413                                                         | riboflavin synthase subunit alpha                       | 84.77 | 201     | MAP1413                                                             | riboflavin synthase subunit alpha                         | 84.77 | 201     | MV_3366                                                             | riboflavin synthase subunit alpha                       | 100   | 199       | BCG_1475                                                            | riboflavin synthase subunit alpha                       | 84.77 | 201     | MAP139                                                        | riboflavin synthase subunit alpha                       | 199   | 100   |
| MAP4_2715 | lipoprotein lprG                                            | 67.93 | 238     | MAP1412                                                         | Conserved lipoprotein lprG                              | 67.93 | 236     | MB1446c                                                             | lipoprotein lprG                                          | 67.93 | 236     | MV_3367                                                             | lprG protein                                            | 100   | 235       | BCG_1472c                                                           | lipoprotein lprG                                        | 67.93 | 236     | MAP138c                                                       | hypothetical protein                                    | 238   | 100   |
| MAP4_2716 | aminoglycoside/tetracycline-transport membrane protein      | 53.8  | Rv1410c | Aminoglycoside/tetracycline-transport membrane protein          | 60.83                                                   | 538   | MB1445c | aminoglycoside/tetracycline-transport membrane protein              | 60.83                                                     | 538   | MV_3369 | aminoglycoside/tetracycline-transport membrane protein              | 100                                                     | 538   | BCG_1471c | aminoglycoside/tetracycline-transport membrane protein              | 53.8                                                    | 538   | MAP137c | hypothetical protein                                          | 532                                                     | 99.81 |       |
| MAP4_2717 | aminoglycoside/tetracycline-transport membrane protein      | 31.0  | Rv1409  | Possible aminoglycoside/tetracycline-transport membrane protein | 31.0                                                    | 409   | MB1444  | bifunctional aminoglycoside/tetracycline-transport membrane protein | 31.0                                                      | 409   | MV_3368 | bifunctional aminoglycoside/tetracycline-transport membrane protein | 98.53                                                   | 341   | BCG_1470  | bifunctional aminoglycoside/tetracycline-transport membrane protein | 31.0                                                    | 409   | MAP137  | RiB                                                           | 341                                                     | 100   |       |
| MAP4_2718 | Ribulose biphosphate 3-epimerase                            | 86.53 | Rv1408  | Possible ribulose biphosphate 3-epimerase                       | 86.53                                                   | 232   | MB1443  | Ribulose biphosphate 3-epimerase                                    | 86.53                                                     | 232   | MV_3370 | Ribulose biphosphate 3-epimerase                                    | 100                                                     | 232   | BCG_1469  | Ribulose biphosphate 3-epimerase                                    | 86.53                                                   | 232   | MAP135  | Ribulose biphosphate 3-epimerase                              | 232                                                     | 99.57 |       |
| MAP4_2719 | putative Fmu protein (SUN protein), ribosomal RNA methylase | 87.25 | 467     | MAP134                                                          | Fmu protein (SUN protein)                               | 87.25 | 457     | MB1442                                                              | Fmu protein (SUN protein)                                 | 87.25 | 457     | MV_3371                                                             | Fmu protein                                             | 98.41 | 439       | BCG_1468                                                            | Fmu protein                                             | 87.25 | 457     | MAP134                                                        | Fmu protein                                             | 464   | 100   |
| MAP4_2720 | Methionyl-tRNA formyltransferase                            | 82.22 | 312     | MAP133                                                          | Methionyl-tRNA formyltransferase                        | 82.22 | 312     | MB1441                                                              | Methionyl-tRNA formyltransferase                          | 82.22 | 312     | MV_3372                                                             | Methionyl-tRNA formyltransferase                        | 97.78 | 317       | BCG_1467                                                            | Methionyl-tRNA formyltransferase                        | 82.22 | 312     | MAP133                                                        | Methionyl-tRNA formyltransferase                        | 314   | 100   |
| MAP4_2721 | putative methyltransferase                                  | 75.18 | 274     | MAP132                                                          | Putative methyltransferase                              | 75.18 | 274     | MB1440c                                                             | methyltransferase                                         | 75.18 | 274     | MV_3373                                                             | methyltransferase                                       | 98.91 | 275       | BCG_1466c                                                           | methyltransferase                                       | 75.18 | 274     | MAP132c                                                       | hypothetical protein                                    | 275   | 100   |
| MAP4_2722 | Transcriptional regulator, MarR family                      | 81.58 | 160     | MAP131                                                          | Transcriptional regulator, MarR family                  | 81.58 | 160     | MB1439                                                              | Transcriptional regulator                                 | 81.58 | 160     | MV_3374                                                             | MarR family transcriptional regulator                   | 100   | 160       | BCG_1465                                                            | Transcriptional regulator                               | 81.58 | 160     | MAP131                                                        | Transcriptional regulator                               | 160   | 100   |
| MAP4_2723 | primosome assembly protein PNA                              | 82.22 | 655     | MAP130                                                          | Primosome assembly protein PNA                          | 82.22 | 655     | MB1438                                                              | primosome assembly protein                                | 82.22 | 655     | MV_3375                                                             | primosome assembly protein PNA                          | 98.08 | 674       | BCG_1463                                                            | primosome assembly protein PNA                          | 82.22 | 655     | MAP130                                                        | primosome assembly protein PNA                          | 655   | 100   |
| MAP4_2724 | membrane protein                                            | 71.78 | 200     | MAP129                                                          | Membrane protein                                        | 71.78 | 200     | MB1437                                                              | hypothetical protein                                      | 71.78 | 200     | MV_3376                                                             | hypothetical protein                                    | 98.86 | 263       | BCG_1462                                                            | hypothetical protein                                    | 71.78 | 200     | MAP129                                                        | hypothetical protein                                    | 263   | 100   |
| MAP4_2725 | lipase                                                      | 76.88 | 320     | MAP128c                                                         | lipase                                                  | 76.88 | 320     | MB1435c                                                             | lipase LipI                                               | 76.88 | 320     | MV_3377                                                             | alpha/beta hydrolase                                    | 98.75 | 320       | BCG_1461c                                                           | lipase LipI                                             | 76.88 | 320     | MAP128c                                                       | hypothetical protein                                    | 320   | 100   |
| MAP4_2726 | monooxygenase                                               | 83.1  | 492     | MAP127c                                                         | monooxygenase                                           | 83.1  | 492     | MB1432c                                                             | monooxygenase                                             | 83.1  | 492     | MV_3378                                                             | lypolic enzyme                                          | 99.35 | 496       | BCG_1454c                                                           | monooxygenase                                           | 83.1  | 492     | MAP127c                                                       | hypothetical protein                                    | 496   | 99.8  |
| MAP4_2727 | S-adenosylmethionine synthetase                             | 91.91 | 403     | MAP126                                                          | S-adenosylmethionine synthetase                         | 91.91 | 403     | MB1427                                                              | S-adenosylmethionine synthase                             | 91.91 | 403     | MV_3382                                                             | S-adenosylmethionine synthetase                         | 97.77 | 403       | BCG_1453                                                            | S-adenosylmethionine synthetase                         | 91.91 | 403     | MAP126                                                        | S-adenosylmethionine synthetase                         | 403   | 100   |
| MAP4_2728 | DNA-dependent metabolism flagellin operon difP              | 87.8  | 418     | MAP125                                                          | Probable DNA-dependent metabolism flagellin operon difP | 87.8  | 418     | MB1426                                                              | bifunctional phosphoglycerate synthase                    | 87.8  | 418     | MV_3383                                                             | bifunctional phosphoglycerate synthase                  | 94.1  | 424       | BCG_1452                                                            | bifunctional phosphoglycerate synthase                  | 87.8  | 418     | MAP125                                                        | bifunctional phosphoglycerate synthase                  | 403   | 100   |
| MAP4_2729 | DNA-directed RNA polymerase omega subunit                   | 89.09 | 110     | MAP124                                                          | DNA-directed RNA polymerase omega subunit               | 89.09 | 110     | MB1425                                                              | DNA-directed RNA polymerase                               | 89.09 | 110     | MV_3384                                                             | DNA-directed RNA polymerase subunit                     | 99.07 | 108       | BCG_1451                                                            | DNA-directed RNA polymerase                             | 89.09 | 110     | MAP124                                                        | DNA-directed RNA polymerase subunit                     | 108   | 100   |
| MAP4_2730 | guanylate kinase                                            | 80.98 | 208     | MAP123                                                          | guanylate kinase Gmk                                    | 80.98 | 208     | MB1424                                                              | guanylate kinase                                          | 80.98 | 208     | MV_3385                                                             | guanylate kinase                                        | 99    | 201       | BCG_1450                                                            | guanylate kinase                                        | 80.98 | 208     | MAP123                                                        | guanylate kinase                                        | 223   | 100   |
| MAP4_2731 | integration host factor                                     | 96.36 | 190     | MAP122                                                          | Integration host factor                                 | 96.36 | 190     | MB1423                                                              | integration host factor                                   | 96.36 | 190     | MV_3386                                                             | integration host factor                                 | 99.04 | 104       | BCG_1449                                                            | integration host factor                                 | 96.36 | 190     | MAP122                                                        | integration host factor                                 | 111   | 100   |
| MAP4_2732 | DNA binding domain-containing protein                       | 38.46 | 101     | MAP121c                                                         | hypothetical protein                                    | 38.46 | 101     | MB1422                                                              | hypothetical protein                                      | 38.46 | 101     | MV_3387                                                             | TrdE protein                                            | 100   | 140       | BCG_1448                                                            | hypothetical protein                                    | 38.46 | 101     | MAP121c                                                       | hypothetical protein                                    | 165   | 99.29 |
| MAP4_2733 | Oxidative 5-phosphate decarboxylase                         | 82.12 | 274     | MAP120                                                          | Oxidative 5-phosphate decarboxylase                     | 82.12 | 274     | MB1421                                                              | oxidative 5-phosphate decarboxylase                       | 82.12 | 274     | MV_3388                                                             | oxidative 5-phosphate decarboxylase                     | 99.63 | 274       | BCG_1445                                                            | oxidative 5-phosphate decarboxylase                     | 82.12 | 274     | MAP120                                                        | oxidative 5-phosphate decarboxylase                     | 274   | 100   |
| MAP4_2734 | Carbamoyl-phosphate synthase large chain                    | 92.43 | 1115    | MAP119                                                          | Carbamoyl-phosphate synthase large chain                | 92.43 | 1115    | MB1420                                                              | carbamoyl phosphate synthase                              | 92.43 | 1115    | MV_3389                                                             | carbamoyl phosphate synthase large chain                | 99.73 | 1117      | BCG_1443                                                            | carbamoyl phosphate synthase large chain                | 92.43 | 1115    | MAP119                                                        | carbamoyl phosphate synthase large chain                | 1117  | 100   |
| MAP4_2735 | Carbamoyl-phosphate synthase small chain                    | 87.17 | 376     | MAP118                                                          | Carbamoyl-phosphate synthase small chain                | 87.17 | 376     | MB1418                                                              | carbamoyl phosphate synthase                              | 87.17 | 376     | MV_3390                                                             | carbamoyl phosphate synthase small chain                | 99.46 | 373       | BCG_1444                                                            | carbamoyl phosphate synthase                            | 87.17 | 376     | MAP118                                                        | carbamoyl phosphate synthase small chain                | 373   | 100   |
| MAP4_2736 | hypothetical protein                                        | 71.6  | 165     | MAP117                                                          | export or membrane protein                              | 71.6  | 165     | MB1417                                                              | export or membrane protein                                | 71.6  | 165     | MV_3391                                                             | hypothetical protein                                    | 99.41 | 170       | BCG_1443                                                            | export or membrane protein                              | 71.6  | 165     | MAP117                                                        | hypothetical protein                                    | 170   | 100   |
| MAP4_2737 | Dihydrodipicolinate synthase PycD                           | 49.07 | 430     | MAP116                                                          | Dihydrodipicolinate synthase PycD                       | 49.07 | 430     | MB1416                                                              | dihydrodipicolinate synthase                              | 49.07 | 430     | MV_3392                                                             | dihydrodipicolinate synthase                            | 98.48 | 430       | BCG_1442                                                            | dihydrodipicolinate synthase                            | 49.07 | 430     | MAP116                                                        | Dihydrodipicolinate synthase                            | 430   | 100   |
| MAP4_2738 | Aspartate carbamoyltransferase                              | 91.05 | 319     | MAP115                                                          | Aspartate carbamoyltransferase                          | 91.05 | 319     | MB1415                                                              | dihydrodipicolinate synthase                              | 91.05 | 319     | MV_3393                                                             | dihydrodipicolinate synthase                            | 100   | 318       | BCG_1441                                                            | aspartate carbamoyltransferase                          | 91.05 | 319     | MAP115                                                        | aspartate carbamoyltransferase catalytic subunit        | 318   | 100   |
| MAP4_2739 | pyrimidine operon regulatory protein pyrF                   | 88.08 | 193     | MAP114                                                          | hypothetical protein                                    | 88.08 | 193     | MB1414                                                              | bifunctional pyrimidine regul                             | 88.08 | 193     | MV_3394                                                             | bifunctional pyrimidine regulatory protein              | 99.75 | 190       | BCG_1440                                                            | bifunctional pyrimidine regul                           | 88.08 | 193     | MAP114                                                        | bifunctional pyrimidine regulatory protein              | 190   | 100   |
| MAP4_2740 | putative beta-lactamase                                     | 82.23 | 377     | MAP113c                                                         | hypothetical protein                                    | 82.23 | 377     | MB1402c                                                             | hypothetical protein                                      | 82.23 | 377     | MV_3395                                                             | beta-lactamase                                          | 99.5  | 401       | BCG_1429c                                                           | hypothetical protein                                    | 82.23 | 377     | MAP113c                                                       | hypothetical protein                                    | 377   | 100   |
| MAP4_2741 | acetyltransferase, GNAT domain-containing protein           | 29.67 | 157     | MAP112c                                                         | acetyltransferase, GNAT domain-containing protein       | 29.67 | 157     | MB1402                                                              | hypothetical protein                                      | 29.67 | 157     | MV_3396                                                             | acetyltransferase, gnat family protein                  | 100   | 184       | BCG_2682                                                            | hypothetical protein                                    | 29.67 | 157     | MAP112c                                                       | hypothetical protein                                    | 179   | 100   |
| MAP4_2742 | hydrophobic motif repeat-containing protein                 | 25.97 | 646     | MAP111                                                          | hydrophobic motif repeat-containing protein             | 25.97 | 646     | MB1401                                                              | hydrophobic motif repeat-containing protein               | 25.97 | 646     | MV_3397                                                             | hydrophobic motif repeat-containing protein             | 99.77 | 646       | BCG_2681                                                            | hydrophobic motif repeat-containing protein             | 25.97 | 646     | MAP111                                                        | hydrophobic motif repeat-containing protein             | 646   | 100   |
| MAP4_2743 | sulfate-transport ATP-binding protein ABC transporter S     | 40.61 | 35      | MAP110                                                          | sulfate-transport ATP-binding protein ABC transporter S | 40.61 | 35      | MB1401                                                              | sulfate-transport ATP-binding protein ABC transporter S   | 40.61 | 35      | MV_3398                                                             | sulfate-transport ATP-binding protein ABC transporter S | 100   | 245       | BCG_4121c                                                           | sulfate-transport ATP-binding protein ABC transporter S | 40.61 | 35      | MAP110                                                        | sulfate-transport ATP-binding protein ABC transporter S | 245   | 100   |
| MAP4_2744 | ABC transporter permease                                    | 27.98 | 229     | MAP109                                                          | ABC transporter permease                                | 27.98 | 229     | MB1399                                                              | glycine betaine/serine/threonine ABC transporter permease | 27.98 | 229     | MV_3399                                                             | ABC transporter permease                                | 100   | 286       | BCG_3826c                                                           | ABC transporter permease                                | 27.98 | 229     | MAP109                                                        | ABC transporter permease                                | 286   | 100   |
| MAP4_2745 | putative ferredoxin                                         | 32.84 | 211     | MAP108                                                          | putative ferredoxin                                     | 32.84 | 211     | MB1377                                                              | NADH dehydrogenase subunit                                | 32.84 | 211     | MV_3401                                                             | hypothetical protein                                    | 98.68 | 76        | BCG_3176                                                            | NADH dehydrogenase subunit                              | 32.84 | 211     | MAP108                                                        | putative ferredoxin                                     | 76    | 100   |
| MAP4_2746 | Transcriptional regulator, GntR family                      | 28.09 | 269     | MAP107                                                          | Transcriptional regulator, GntR family                  | 28.09 | 269     | MB1376                                                              | GntR family transcriptional regulator                     | 28.09 | 269     | MV_3402                                                             | GntR-family protein transcriptional regulator           | 98.8  | 250       | BCG_0845c                                                           | GntR family transcriptional regulator                   | 28.09 | 269     | MAP107                                                        | Transcriptional regulator, GntR family                  | 314   | 99.6  |
| MAP4_2747 | hypothetical protein                                        | 43.18 | 666     | MAP106                                                          | hypothetical protein                                    | 43.18 | 666     | MB1308                                                              | transmembrane protein                                     | 43.18 | 666     | MV_3403                                                             | hypothetical protein                                    | 98.28 | 666       | BCG_2941                                                            | transmembrane protein                                   | 43.18 | 666     | MAP106                                                        | hypothetical protein                                    | 666   | 100   |
| MAP4_2750 | hypothetical protein                                        | 85.17 | 105     | MAP105                                                          | possible toxin MafB                                     | 85.17 | 105     | MB1297c                                                             | hypothetical protein                                      | 85.17 | 105     | MV_3404                                                             | hypothetical protein                                    | 97.14 | 105       | BCG_2941c                                                           | hypothetical protein                                    | 85.17 | 105     | MAP105                                                        | hypothetical protein                                    | 108   | 100   |
| MAP4_2751 | two component DNA binding transcriptional regulator         | 50.45 | 253     | MAP104                                                          | two component DNA binding transcriptional regulator     | 50.45 | 253     | MB108c                                                              | two component DNA binding                                 | 50    | 253     | MV_3406                                                             | TrcA protein                                            | 99.1  | 222       | BCG_0268                                                            | two component DNA binding                               | 50    | 253     | MAP104                                                        | two component DNA binding transcriptional regulator     | 222   | 100   |
| MAP4_2752 | putative histidine kinase                                   | 31.25 | 485     | MAP103                                                          | putative histidine kinase                               | 31.25 | 485     | MB107                                                               | two component system response regulator                   | 31.25 | 485     | MV_3405                                                             | hypothetical protein                                    | 99.36 | 467       | BCG_0810                                                            | two component system response regulator                 | 31.25 | 485     | MAP103                                                        | putative histidine kinase                               | 467   | 100   |
| MAP4_2753 | hypothetical protein                                        | 37.74 | 588     | MAP102                                                          | PE family protein PE1                                   | 37.74 | 588     | MB105c                                                              | PE family protein                                         | 37.74 | 588     | MV_3407                                                             | hypothetical protein                                    | 98.79 | 80        | BCG_0817c                                                           | PE family protein                                       | 37.74 | 588     | MAP102                                                        | hypothetical protein                                    | 304   | 32.2  |
| MAP4_2754 | amino acid decarboxylase                                    | 86.02 | 947     | MAP101                                                          | amino acid decarboxylase                                | 86.02 | 947     | MB105                                                               | amino acid decarboxylase                                  | 86.02 | 947     | MV_3408                                                             | lysine/lysine decarboxylase                             | 99.69 | 950       | BCG_2533c                                                           | amino acid decarboxylase                                | 86.02 | 947     | MAP101                                                        | amino acid decarboxylase                                | 950   | 100   |
| MAP4_2755 | hypothetical protein                                        | 75.19 | 133     | MAP099                                                          | hypothetical protein                                    | 75.19 | 133     | MB1261c                                                             | hypothetical protein                                      | 75.19 | 133     | MV_3409                                                             | N utilization substrate protein B                       | 99.22 | 129       | BCG_2534c                                                           | hypothetical protein                                    | 75.19 | 133     | MAP099                                                        | hypothetical protein                                    | 129   | 100   |
| MAP4_2756 | N utilization substrate protein B nusB                      | 82.67 | 156     | MAP098                                                          | N utilization substrate protein B nusB                  | 82.67 | 156     | MB1256c                                                             | transcription antitermination                             | 82.67 | 156     | MV_3410                                                             | transcription antitermination protein                   | 100   | 156       | BCG_2555c                                                           | N utilization substrate protein B                       | 82.67 | 156     | MAP098                                                        | N utilization substrate protein B nusB                  | 156   | 100   |
| MAP4_2757 | translational elongation factor P                           | 92.51 | 187     | MAP097                                                          | translational elongation factor P                       | 92.51 | 187     | MB1211                                                              | elongation factor P</                                     |       |         |                                                                     |                                                         |       |           |                                                                     |                                                         |       |         |                                                               |                                                         |       |       |

# Table S1 continued

|           |                                                           |       |         |                                               |       |      |          |                                                |       |      |          |                                                |       |      |           |                                                |       |      |          |                                        |      |       |
|-----------|-----------------------------------------------------------|-------|---------|-----------------------------------------------|-------|------|----------|------------------------------------------------|-------|------|----------|------------------------------------------------|-------|------|-----------|------------------------------------------------|-------|------|----------|----------------------------------------|------|-------|
| MAP4_2813 | Protein-export membrane protein SecD                      | 607   | Rv2587c | Probable protein-export membrane protein      | 79.08 | 573  | Mb2618c  | preprotein translocase subunit SecD            | 78.91 | 573  | MbV_3468 | preprotein translocase subunit SecD            | 100   | 608  | BCG_2610c | preprotein translocase subunit SecD            | 79.08 | 573  | MAP1043  | preprotein translocase subunit SecD    | 607  | 100   |
| MAP4_2814 | membrane protein secretion factor yj6C                    | 108   | Rv2588c | Probable conserved membrane protein           | 74.78 | 115  | Mb2619c  | preprotein translocase subunit SecE            | 74.78 | 115  | MbV_3469 | preprotein translocase subunit SecE            | 100   | 110  | BCG_2611c | preprotein translocase subunit SecE            | 74.78 | 115  | MAP1042  | preprotein translocase subunit SecE    | 608  | 100   |
| MAP4_2815 | 4-aminobutyrate aminotransferase                          | 46    | Rv2589c | 4-aminobutyrate aminotransferase              | 66.86 | 446  | Mb2620c  | 4-aminobutyrate aminotransferase               | 66.86 | 446  | MbV_3470 | 4-aminobutyrate aminotransferase               | 99.33 | 449  | BCG_2612c | 4-aminobutyrate aminotransferase               | 66.86 | 446  | MAP1041  | 4-aminobutyrate aminotransferase       | 46   | 100   |
| MAP4_2816 | fatty-acyl-CoA ligase FadF9                               | 1173  | Rv2590  | Probable fatty-acyl-CoA ligase FadF9          | 69.84 | 1168 | Mb2621c  | fatty-acyl-CoA ligase                          | 69.75 | 1168 | MbV_3471 | fatty-acyl-CoA ligase                          | 99.33 | 1173 | BCG_2613c | fatty-acyl-CoA ligase FadF9                    | 69.75 | 1168 | MAP1040c | fatty-acyl-CoA ligase                  | 1173 | 100   |
| MAP4_2817 | hypothetical protein                                      | 314   | Rv3440  | Probable O-acetylthioesterase sulfhydrylase   | 32.93 | 449  | Mb3372   | O-acetylthioesterase sulfhydrylase             | 32.93 | 449  | MbV_3472 | hypothetical protein                           | 100   | 225  | BCG_1809c | transcriptional regulatory protein             | 27.42 | 186  | MAP1039  | hypothetical protein                   | 314  | 100   |
| MAP4_2818 | holliday junction DNA helicase RuvB                       | 351   | Rv2592c | Probable holliday junction DNA helicase       | 94.2  | 344  | Mb2623c  | Holliday junction DNA helicase                 | 94.2  | 344  | MbV_3473 | Holliday junction DNA helicase RuvB            | 100   | 351  | BCG_2615c | Holliday junction DNA helicase                 | 94.2  | 344  | MAP1038  | Holliday junction DNA helicase RuvB    | 351  | 100   |
| MAP4_2819 | holliday junction DNA helicase RuvA                       | 199   | Rv2593c | Probable holliday junction DNA helicase       | 83.92 | 196  | Mb2624c  | Holliday junction DNA helicase                 | 83.92 | 196  | MbV_3474 | Holliday junction DNA helicase RuvA            | 100   | 199  | BCG_2616c | Holliday junction DNA helicase                 | 83.92 | 196  | MAP1037  | Holliday junction DNA helicase RuvA    | 199  | 100   |
| MAP4_2820 | proteasome activator complex subunit RuvC                 | 189   | Rv2594c | Probable proteasome activator complex subunit | 84.41 | 188  | Mb2625c  | Holliday junction resolvase                    | 84.41 | 188  | MbV_3475 | Holliday junction resolvase                    | 100   | 189  | BCG_2617c | Holliday junction resolvase                    | 84.41 | 188  | MAP1036  | Holliday junction resolvase            | 189  | 100   |
| MAP4_2821 | hypothetical protein                                      | 203   | Rv2597  | Probable conserved membrane protein           | 72.33 | 206  | Mb2628c  | hypothetical protein                           | 72.33 | 206  | MbV_3476 | hypothetical protein                           | 100   | 203  | BCG_2620  | hypothetical protein                           | 72.33 | 206  | MAP1035c | hypothetical protein                   | 203  | 100   |
| MAP4_2822 | hypothetical protein                                      | 167   | Rv2598  | Probable conserved membrane protein           | 67.66 | 164  | Mb2629c  | hypothetical protein                           | 67.66 | 164  | MbV_3477 | hypothetical protein                           | 98.2  | 183  | BCG_2621  | hypothetical protein                           | 67.66 | 164  | MAP1034c | hypothetical protein                   | 167  | 100   |
| MAP4_2823 | putative conserved membrane protein                       | 69.11 | Rv2599  | Probable conserved membrane protein           | 69.11 | 143  | Mb2630c  | hypothetical protein                           | 69.11 | 143  | MbV_3478 | hypothetical protein                           | 98.6  | 143  | BCG_2622  | hypothetical protein                           | 69.11 | 143  | MAP1028c | hypothetical protein                   | 285  | 38.89 |
| MAP4_2824 | transposase, IS900                                        | 406   | Rv0797  | Putative transposase for insertion site       | 28.61 | 364  | Mb3030   | transposase                                    | 28.35 | 570  | MbV_1059 | transposase                                    | 29.01 | 350  | BCG_3397  | transposase fusion protein                     | 28.35 | 570  | MAP0304  | hypothetical protein                   | 406  | 100   |
| MAP4_2825 | hypothetical protein                                      | 151   | Rv2600  | Probable conserved integral membrane protein  | 62.88 | 133  | Mb2631c  | hypothetical protein                           | 62.88 | 133  | MbV_3479 | hypothetical protein                           | 98.01 | 151  | BCG_2623  | integral membrane protein                      | 62.88 | 133  | MAP1032c | hypothetical protein                   | 151  | 100   |
| MAP4_2826 | sermidase synthase                                        | 523   | Rv2601  | Probable sermidase synthase SpdF              | 80.71 | 523  | Mb2632c  | sermidase synthase                             | 80.71 | 523  | MbV_3480 | sermidase synthase                             | 98.66 | 523  | BCG_2625  | sermidase synthase                             | 80.71 | 523  | MAP1031c | sermidase synthase                     | 523  | 99.81 |
| MAP4_2827 | hypothetical protein                                      | 250   | Rv2603c | Highly conserved protein                      | 87.6  | 251  | Mb2635c  | hypothetical protein                           | 87.6  | 251  | MbV_3481 | hypothetical protein                           | 99.2  | 250  | BCG_2628c | hypothetical protein                           | 87.6  | 251  | MAP1030  | hypothetical protein                   | 250  | 100   |
| MAP4_2828 | Mycothiol S-conjugate amidase Mca                         | 83.8  | Rv1082  | Mycothiol conjugate amidase Mca               | 83.8  | 288  | Mb1111c  | mycothiol conjugate amidase                    | 83.8  | 288  | MbV_1205 | mycothiol conjugate amidase Mca                | 99.65 | 290  | BCG_1140  | Mycothiol conjugate amidase                    | 83.8  | 288  | MAP1029  | hypothetical protein                   | 296  | 100   |
| MAP4_2829 | hypothetical protein                                      | 69.72 | Rv1081c | Probable conserved membrane protein           | 69.72 | 144  | Mb1110c  | hypothetical protein                           | 69.72 | 144  | MbV_1206 | hypothetical protein                           | 97.87 | 141  | BCG_1139c | hypothetical protein                           | 69.72 | 144  | MAP1028c | hypothetical protein                   | 141  | 100   |
| MAP4_2830 | Transcription elongation factor GreA                      | 96.95 | Rv1090c | Probable transcription elongation factor      | 96.95 | 164  | Mb1109c  | transcription elongation factor                | 96.95 | 164  | MbV_1204 | transcription elongation factor GreA           | 100   | 138  | BCG_1139c | transcription elongation factor GreA           | 96.95 | 164  | MAP1027c | transcription elongation factor GreA   | 164  | 100   |
| MAP4_2831 | cystathionine gamma-synthase                              | 85.01 | Rv1079  | Cystathionine gamma-synthase                  | 85.01 | 389  | Mb1108   | cystathionine gamma-synthase                   | 85.01 | 389  | MbV_1203 | cystathionine gamma-synthase                   | 100   | 389  | BCG_1137  | cystathionine gamma-synthase                   | 85.01 | 389  | MAP1026c | cystathionine gamma-synthase           | 389  | 100   |
| MAP4_2832 | proline-rich antigen pra                                  | 68.94 | Rv1873  | Probable conserved Mce associated             | 68.94 | 240  | MbV_1207 | Pra protein                                    | 68.94 | 240  | MbV_1207 | Pra protein                                    | 99.16 | 239  | BCG_1136  | hypothetical protein                           | 68.94 | 240  | MAP1025  | Pra                                    | 241  | 100   |
| MAP4_2833 | Cystathionine beta-synthase                               | 91.45 | Rv1077  | Probable cystathionine beta-synthase          | 91.45 | 464  | Mb1105c  | cystathionine beta-synthase                    | 91.45 | 464  | MbV_1201 | cystathionine beta-synthase                    | 100   | 468  | BCG_1135  | cystathionine beta-synthase                    | 91.45 | 464  | MAP1024  | CysM2                                  | 468  | 100   |
| MAP4_2834 | lipase LipJ                                               | 80.13 | Rv1076  | Possible lipase LipJ                          | 80.13 | 297  | Mb1106c  | lipase LipJ                                    | 80.13 | 297  | MbV_1202 | lipase LipJ                                    | 99.15 | 354  | BCG_1134  | lipase lipJ                                    | 80.13 | 297  | MAP1023  | hypothetical protein                   | 357  | 100   |
| MAP4_2835 | conserved exported protein                                | 76.92 | Rv1075c | Conserved exported protein                    | 76.92 | 314  | Mb1104c  | hypothetical protein                           | 76.92 | 314  | MbV_1200 | hypothetical protein                           | 99.69 | 324  | BCG_1133  | hypothetical protein                           | 76.92 | 314  | MAP1022c | hypothetical protein                   | 314  | 100   |
| MAP4_2836 | hypothetical protein                                      | 86.22 | Rv1072  | Probable conserved transmembrane protein      | 86.22 | 278  | Mb1101   | transmembrane protein                          | 86.22 | 278  | MbV_1199 | hypothetical protein                           | 100   | 255  | BCG_1130  | hypothetical protein                           | 86.22 | 278  | MAP1019  | hypothetical protein                   | 283  | 100   |
| MAP4_2839 | enoyl-CoA hydratase echA9                                 | 89.25 | Rv1071c | Possible enoyl-CoA hydratase EchA9            | 89.25 | 345  | Mb1003c  | 3-hydroxyisobutyryl-CoA hydrolase              | 89.25 | 345  | MbV_1197 | 3-hydroxyisobutyryl-CoA hydrolase              | 99.42 | 345  | BCG_1129c | 3-hydroxyisobutyryl-CoA hydrolase              | 89.25 | 345  | MAP1018c | 3-hydroxyisobutyryl-CoA hydratase      | 350  | 99.71 |
| MAP4_2840 | enoyl-CoA hydratase echA8                                 | 89.06 | Rv1070c | Possible enoyl-CoA hydratase EchA8            | 89.06 | 257  | Mb1099c  | enoyl-CoA hydratase                            | 89.06 | 257  | MbV_1195 | enoyl-CoA hydratase                            | 98.86 | 263  | BCG_1128c | enoyl-CoA hydratase                            | 89.06 | 257  | MAP1017c | enoyl-CoA hydratase                    | 263  | 100   |
| MAP4_2841 | putative hydrolase                                        | 77.4  | Rv1069c | hypothetical protein                          | 77.4  | 587  | Mb1098c  | hypothetical protein                           | 77.4  | 587  | MbV_1193 | hypothetical protein                           | 99.33 | 594  | BCG_1127c | hypothetical protein                           | 77.23 | 587  | MAP1016c | hypothetical protein                   | 594  | 100   |
| MAP4_2842 | hypothetical protein                                      | 81.68 | Rv1066  | hypothetical protein                          | 81.68 | 131  | Mb1095c  | hypothetical protein                           | 81.68 | 131  | MbV_1192 | hypothetical protein                           | 99.31 | 145  | BCG_1126c | hypothetical protein                           | 81.68 | 131  | MAP1015c | hypothetical protein                   | 145  | 100   |
| MAP4_2843 | hypothetical protein                                      | 82.85 | Rv1065  | hypothetical protein                          | 82.85 | 199  | Mb1094c  | hypothetical protein                           | 82.85 | 199  | MbV_1191 | hypothetical protein                           | 98.82 | 197  | BCG_1125c | hypothetical protein                           | 82.85 | 199  | MAP1014c | hypothetical protein                   | 197  | 100   |
| MAP4_2844 | putative lipoprotein LipQV                                | 61.54 | Rv1064c | Putative lipoprotein LipQV                    | 61.54 | 139  | Mb1093c  | lipoprotein LipQV                              | 61.54 | 139  | MbV_1191 | LipQ protein                                   | 99.84 | 135  | BCG_1124c | lipoprotein LipQV                              | 61.54 | 139  | MAP1013c | hypothetical protein                   | 139  | 100   |
| MAP4_2845 | putative phospholipase, patatin-like phospholipase family | 76.29 | Rv1063c | hypothetical protein                          | 76.29 | 360  | Mb1092c  | hypothetical protein                           | 76.29 | 360  | MbV_1190 | patatin                                        | 98.84 | 345  | BCG_1121c | hypothetical protein                           | 76.29 | 360  | MAP1012c | hypothetical protein                   | 356  | 100   |
| MAP4_2846 | putative phospholipase, patatin-like phospholipase family | 74.39 | Rv1062  | hypothetical protein                          | 74.39 | 285  | Mb1091c  | hypothetical protein                           | 74.39 | 285  | MbV_1189 | phospholipase, patatin family protein          | 98.62 | 289  | BCG_1120  | hypothetical protein                           | 74.39 | 285  | MAP1011c | hypothetical protein                   | 289  | 100   |
| MAP4_2847 | transcriptional activator, class-II family prn            | 74.83 | Rv1061  | hypothetical protein                          | 74.83 | 290  | Mb1090c  | transcriptional activator, class-II family prn | 74.83 | 290  | MbV_1188 | transcriptional activator, class-II family prn | 98.67 | 295  | BCG_1119c | transcriptional activator, class-II family prn | 74.83 | 290  | MAP1010c | hypothetical protein                   | 295  | 100   |
| MAP4_2848 | hypothetical protein                                      | 57.42 | Rv1060  | hypothetical protein                          | 57.42 | 157  | Mb1089c  | hypothetical protein                           | 57.42 | 157  | MbV_1187 | hypothetical protein                           | 98.82 | 157  | BCG_1118c | hypothetical protein                           | 57.42 | 157  | MAP1009  | long-chain-fatty-acyl-CoA ligase       | 157  | 100   |
| MAP4_2849 | medium chain fatty-acyl-CoA ligase fadD14                 | 83.33 | Rv1059  | Probable medium chain fatty-acyl-CoA ligase   | 83.33 | 543  | Mb1088c  | long-chain-fatty-acyl-CoA ligase               | 83.33 | 543  | MbV_1186 | long-chain-fatty-acyl-CoA ligase               | 98.53 | 543  | BCG_1116  | long-chain-fatty-acyl-CoA ligase               | 83.33 | 543  | MAP1008  | long-chain-fatty-acyl-CoA ligase       | 549  | 99.63 |
| MAP4_2850 | hypothetical protein                                      | 51.74 | Rv1057  | hypothetical protein                          | 51.74 | 393  | Mb1086c  | hypothetical protein                           | 51.74 | 393  | MbV_1185 | hypothetical protein                           | 98.99 | 395  | BCG_1115  | hypothetical protein                           | 51.74 | 393  | MAP1007  | hypothetical protein                   | 395  | 100   |
| MAP4_2851 | hypothetical protein                                      | 83.67 | Rv1056  | hypothetical protein                          | 83.67 | 254  | Mb1085c  | hypothetical protein                           | 83.67 | 254  | MbV_1184 | hypothetical protein                           | 98.83 | 256  | BCG_1114  | hypothetical protein                           | 83.67 | 254  | MAP1006  | hypothetical protein                   | 256  | 100   |
| MAP4_2852 | hypothetical protein                                      | 39    | Rv1057  | hypothetical protein                          | 39    | 403  | Mb1084c  | adhesion component transp                      | 39    | 403  | MbV_1183 | hypothetical protein                           | 98.62 | 265  | BCG_1092  | adhesion component transp                      | 39    | 403  | MAP1005  | hypothetical protein                   | 403  | 100   |
| MAP4_2853 | hypothetical protein                                      | 62.72 | Rv1056c | hypothetical protein                          | 62.72 | 407  | Mb1083c  | hypothetical protein                           | 62.72 | 407  | MbV_1181 | hypothetical protein                           | 98.76 | 403  | BCG_2086c | hypothetical protein                           | 62.72 | 407  | MAP1004  | hypothetical protein                   | 403  | 100   |
| MAP4_2854 | PPE family protein                                        | 51.26 | Rv2768c | PPE family protein PPE43                      | 50.5  | 394  | Mb1086c  | PPE family protein                             | 51.26 | 397  | MbV_1347 | PPE family protein                             | 98.67 | 383  | BCG_1093  | PPE family protein                             | 51.26 | 397  | MAP1003c | hypothetical protein                   | 383  | 100   |
| MAP4_2855 | putative ESAT-6 like protein EspL                         | 87.76 | Rv2474c | Putative ESAT-6 like protein EspL             | 87.76 | 98   | Mb1820   | hypothetical protein                           | 87.76 | 98   | MbV_1178 | hypothetical protein                           | 100   | 98   | BCG_1824  | ESAT-6 like protein                            | 87.76 | 98   | MAP1508  | hypothetical protein                   | 98   | 100   |
| MAP4_2856 | putative ESAT-6 like protein ESXO                         | 93.62 | Rv1793  | Putative ESAT-6 like protein ESXO             | 93.62 | 94   | Mb1821   | ESAT-6 like protein                            | 93.62 | 94   | MbV_1177 | hypothetical protein                           | 100   | 94   | BCG_1825  | ESAT-6 like protein                            | 93.62 | 94   | MAP1212c | hypothetical protein                   | 98   | 38.1  |
| MAP4_2857 | two-component transcriptional regulator TcrR              | 85.21 | Rv1032c | Two component transcriptional regulator       | 85.21 | 257  | Mb1061c  | two component transcriptional regulator        | 85.21 | 257  | MbV_1176 | Tcr family transcriptional regulator           | 100   | 254  | BCG_1091c | two component transcriptional regulator        | 85.21 | 257  | MAP1021c | hypothetical protein                   | 257  | 100   |
| MAP4_2858 | two component sensor histidine kinase TcrE                | 73.85 | Rv1033c | Two component sensor histidine kinase         | 73.85 | 509  | Mb1061c  | two component sensor histidine kinase          | 73.85 | 509  | MbV_1175 | two component sensor histidine kinase          | 99.22 | 512  | BCG_1090c | two component sensor histidine kinase          | 73.85 | 509  | MAP1001c | hypothetical protein                   | 512  | 100   |
| MAP4_2859 | potassium-translocating ATPase AtpA                       | 52.23 | Rv1029  | Probable potassium-translocating ATPase       | 52.23 | 571  | Mb1056c  | potassium-translocating ATPase                 | 52.23 | 571  | MbV_1171 | potassium-translocating ATPase subunit         | 99.28 | 556  | BCG_1087  | potassium-translocating ATPase                 | 52.23 | 571  | MAP1000c | potassium-translocating ATPase subunit | 556  | 100   |
| MAP4_2860 | Potassium-translocating ATPase C chain                    | 46.09 | Rv1031  | Probable potassium-translocating ATPase       | 46.09 | 189  | Mb1060c  | potassium-translocating ATPase                 | 46.09 | 189  | MbV_1171 | K <sup>+</sup> -transporting ATPase, C subunit | 99.66 | 291  | BCG_1089  | potassium-translocating ATPase                 | 46.09 | 189  | MAP099c  | hypothetical protein                   | 189  | 100   |
| MAP4_2861 | sensor protein KdpD                                       | 80    | Rv1028c | Probable sensor protein KdpD                  | 80    | 860  | Mb1056c  | sensor protein KdpD                            | 80    | 860  | MbV_1170 | sensor protein KdpD                            | 99.65 | 854  | BCG_1085c | sensor protein kdpD                            | 79.76 | 860  | MAP099c  | hypothetical protein                   |      |       |

Table S1 continued

|           |                                                           |     |         |                                                                   |       |      |         |                                                           |       |      |          |                                                           |       |     |           |                                                           |       |      |          |                                                    |        |       |
|-----------|-----------------------------------------------------------|-----|---------|-------------------------------------------------------------------|-------|------|---------|-----------------------------------------------------------|-------|------|----------|-----------------------------------------------------------|-------|-----|-----------|-----------------------------------------------------------|-------|------|----------|----------------------------------------------------|--------|-------|
| MAP4_2914 | putative sigma factor                                     | 307 | Rv3228c | Probable alternative RNA polymerase                               | 39.39 | 312  | MB3361c | RNA polymerase sigma factor                               | 39.39 | 312  | MAV_1129 | sigma factor                                              | 99.02 | 308 | BCG_3398c | RNA polymerase sigma factor                               | 99.39 | 312  | MAP0946c | RNA polymerase sigma factor                        | 39.39  | 100   |
| MAP4_2915 | para-aminobenzoate synthase component 1                   | 430 | Rv1005c | Probable para-aminobenzoate synthase                              | 78.4  | 458  | MB1032c | aminodeoxychorismate synthase                             | 78.4  | 458  | MAV_1127 | aminodeoxychorismate synthase                             | 98.02 | 416 | BCG_1062c | aminodeoxychorismate synthase                             | 78.4  | 472  | MAP0945c | aminodeoxychorismate synthase component            | 430    | 100   |
| MAP4_2916 | lysine methylase, tetraproline methylase domain-c         | 478 | Rv1009  | hypothetical protein                                              | 78.06 | 285  | MB1030  | hypothetical protein                                      | 78.06 | 285  | MAV_1128 | hypothetical protein                                      | 98.97 | 278 | BCG_1059c | hypothetical protein                                      | 78.06 | 285  | MAP0944c | hypothetical protein                               | 478    | 100   |
| MAP4_2917 | hypothetical protein                                      | 520 | Rv1002c | hypothetical protein                                              | 85.07 | 503  | MB1029c | hypothetical protein                                      | 84.87 | 507  | MAV_1126 | hypothetical protein                                      | 99.42 | 519 | BCG_1058c | hypothetical protein                                      | 84.87 | 503  | MAP0943c | hypothetical protein                               | 520    | 99.8  |
| MAP4_2918 | Arginine deiminase                                        | 400 | Rv1001  | Probable arginine deiminase                                       | 89.5  | 402  | MB1028  | arginine deiminase                                        | 89.5  | 402  | MAV_1125 | arginine deiminase                                        | 99.42 | 400 | BCG_1057c | arginine deiminase                                        | 89.5  | 402  | MAP0942c | arginine deiminase                                 | 400    | 100   |
| MAP4_2919 | Alkylated DNA repair protein                              | 128 | Rv1000c | hypothetical protein                                              | 83.84 | 205  | MB1027c | alkylated DNA repair protein                              | 83.84 | 205  | MAV_1124 | alkylated DNA repair protein                              | 99.49 | 128 | BCG_1057c | hypothetical protein                                      | 83.84 | 205  | MAP1371  | hypothetical protein                               | 100.05 | 45.71 |
| MAP4_2920 | hypothetical protein                                      | 23  | Rv0999  | hypothetical protein                                              | 68.75 | 252  | MB1026  | hypothetical protein                                      | 68.75 | 252  | MAV_1123 | hypothetical protein                                      | 99.54 | 217 | BCG_1056  | hypothetical protein                                      | 68.75 | 252  | MAP0940  | hypothetical protein                               | 23     | 100   |
| MAP4_2921 | hypothetical protein                                      | 259 | Rv0999  | hypothetical protein                                              | 29.08 | 252  | MB1026  | hypothetical protein                                      | 29.08 | 252  | MAV_1123 | hypothetical protein                                      | 99.73 | 220 | BCG_1056  | hypothetical protein                                      | 29.08 | 252  | MAP0939  | hypothetical protein                               | 259    | 100   |
| MAP4_2922 | cylic nucleotide-binding protein                          | 330 | Rv0988  | hypothetical protein                                              | 76.67 | 333  | MB1025  | hypothetical protein                                      | 76.67 | 333  | MAV_1121 | hypothetical protein                                      | 100   | 330 | BCG_1055  | hypothetical protein                                      | 76.67 | 333  | MAP0938  | hypothetical protein                               | 330    | 100   |
| MAP4_2923 | putative phosphatase                                      | 188 | Rv0114  | Possible D-alpha,beta-D-heptose-1,7-phosphatase                   | 37.88 | 190  | MB0118  | dehydratase                                               | 37.88 | 190  | MAV_1120 | hypothetical protein                                      | 98.4  | 188 | BCG_0147  | dehydratase                                               | 37.88 | 190  | MAP0937  | hypothetical protein                               | 188    | 100   |
| MAP4_2924 | Phosphohexose isomerase 1                                 | 202 | Rv0113  | Probable sedoheptulose-7-phosphatase                              | 48.94 | 196  | MB0117  | phosphohexose isomerase                                   | 48.94 | 196  | MAV_1119 | phosphohexose isomerase                                   | 99.5  | 205 | BCG_0146  | phosphohexose isomerase                                   | 48.94 | 196  | MAP0936  | hypothetical protein                               | 202    | 100   |
| MAP4_2925 | D-alpha-D-heptose-7-phosphate kinase                      | 338 | Rv0115  | Possible D-alpha-D-heptose-7-phosphatase                          | 39.53 | 386  | MB0119  | sugar kinase                                              | 40.74 | 305  | MAV_1118 | D-glucosyl-L-aminoxydehydrogenase                         | 98.67 | 317 | BCG_0149  | sugar kinase                                              | 39.53 | 386  | MAP0935  | hypothetical protein                               | 338    | 100   |
| MAP4_2926 | MAP2 transcriptional regulator superfamily protein        | 377 | Rv2141c | hypothetical protein                                              | 32.14 | 448  | MB2105  | hypothetical protein                                      | 32.14 | 448  | MAV_1117 | hypothetical protein                                      | 98.67 | 317 | BCG_2158c | hypothetical protein                                      | 32.14 | 448  | MAP0934  | hypothetical protein                               | 377    | 100   |
| MAP4_2927 | putative divergase, ResA (Dfe-25)iron-sulfur domain       | 273 | Rv2161c | hypothetical protein                                              | 27.63 | 387  | MB3186  | divergase                                                 | 28.02 | 382  | MAV_1116 | ResA (Dfe-25) domain-containing                           | 98.87 | 389 | BCG_2158c | divergase                                                 | 28.02 | 387  | MAP0933  | hypothetical protein                               | 273    | 100   |
| MAP4_2928 | Transcriptional regulator, TetR family                    | 207 | Rv1255c | Probable transcriptional regulatory protein                       | 26.32 | 202  | MB0376c | AscN family transcriptional regulator                     | 27.34 | 246  | MAV_1115 | TetR family transcriptional regulator                     | 98.51 | 201 | BCG_3074c | AscN family transcriptional regulator                     | 27.34 | 246  | MAP0932c | hypothetical protein                               | 207    | 100   |
| MAP4_2929 | hypothetical protein                                      | 164 | Rv0248c | Polyketide synthase Pks12                                         | 36.59 | 4151 | MB2074c | polyketide synthase                                       | 36.59 | 4151 | MAV_1114 | hypothetical protein                                      | 98.78 | 164 | BCG_2067c | polyketide synthase                                       | 36.59 | 4151 | MAP0931  | hypothetical protein                               | 164    | 100   |
| MAP4_2930 | Transcriptional regulator, TetR family                    | 217 | Rv0302  | Probable transcriptional regulatory protein                       | 28.81 | 210  | MB0310  | TetR/ACRIF family transcriptional regulator               | 28.81 | 210  | MAV_1113 | TetR family transcriptional regulator                     | 99.08 | 217 | BCG_0342  | TetR family transcriptional regulator                     | 28.81 | 210  | MAP0930  | hypothetical protein                               | 217    | 99.52 |
| MAP4_2931 | hypothetical protein                                      | 50  | Rv2529  | hypothetical protein                                              | 43.33 | 463  | MB2058  | hypothetical protein                                      | 43.33 | 463  | MAV_1112 | hypothetical protein                                      | 97.87 | 47  | BCG_2550  | hypothetical protein                                      | 43.33 | 463  | MAP0929  | hypothetical protein                               | 50     | 100   |
| MAP4_2932 | hypothetical protein                                      | 56  | Rv2448c | Probable valyl-RNA synthase protein                               | 32.68 | 876  | MB2475c | valyl-RNA synthetase                                      | 32.69 | 876  | MAV_1111 | hypothetical protein                                      | 97.37 | 38  | BCG_2468c | valyl-RNA synthetase                                      | 32.69 | 876  | MAP0928  | hypothetical protein                               | 56     | 100   |
| MAP4_2933 | hypothetical protein                                      | 362 | Rv0998  | Probable conserved transmembrane protein                          | 65.04 | 358  | MB1003  | transmembrane protein                                     | 63.2  | 358  | MAV_1105 | hypothetical protein                                      | 98.21 | 335 | BCG_1051  | hypothetical protein                                      | 64.5  | 358  | MAP0927  | hypothetical protein                               | 362    | 100   |
| MAP4_2934 | ribosomal-protein-alanine acetyltransferase rimJ          | 217 | Rv0995  | Ribosomal-protein-alanine acetyltransferase                       | 88.61 | 203  | MB1022  | ribosomal-protein-alanine acetyltransferase               | 88.61 | 203  | MAV_1104 | acetyltransferase, GNAT family protein                    | 99.54 | 217 | BCG_1050  | ribosomal-protein-alanine acetyltransferase               | 88.61 | 203  | MAP0926  | rimJ                                               | 217    | 100   |
| MAP4_2935 | molybdopter biosynthesis protein Fae1                     | 428 | Rv0994  | Probable molybdopter biosynthesis protein                         | 87.85 | 426  | MB1021  | molybdopter biosynthesis protein                          | 88.08 | 426  | MAV_1103 | molybdopter biosynthesis protein                          | 100   | 428 | BCG_1049  | molybdopter biosynthesis protein                          | 88.08 | 426  | MAP0925  | hypothetical protein                               | 428    | 99.76 |
| MAP4_2936 | UTP-glucose-1-phosphate uridylyltransferase               | 377 | Rv0993  | UTP-glucose-1-phosphate uridylyltransferase                       | 88.24 | 306  | MB1020  | UTP-glucose-1-phosphate uridylyltransferase               | 88.56 | 306  | MAV_1102 | GaII protein                                              | 99.66 | 297 | BCG_1048  | UTP-glucose-1-phosphate uridylyltransferase               | 88.24 | 306  | MAP0924  | hypothetical protein                               | 377    | 100   |
| MAP4_2937 | 5-formyltetrahydrofolate cyclo-ligase                     | 196 | Rv0992c | hypothetical protein                                              | 77.72 | 197  | MB1019c | hypothetical protein                                      | 77.72 | 197  | MAV_1101 | 5-formyltetrahydrofolate cyclo-ligase                     | 98.98 | 196 | BCG_1047c | hypothetical protein                                      | 77.72 | 197  | MAP0923c | hypothetical protein                               | 196    | 100   |
| MAP4_2938 | conserved serine rich protein                             | 102 | Rv0991  | Conserved serine rich protein                                     | 79.71 | 110  | MB1018c | serine-rich protein                                       | 79.71 | 110  | MAV_1100 | regulatory protein, FmdII family protein                  | 99.07 | 108 | BCG_1046c | hypothetical protein                                      | 79.71 | 110  | MAP0922c | hypothetical protein                               | 102    | 100   |
| MAP4_2939 | hypothetical protein                                      | 226 | Rv0990c | hypothetical protein                                              | 70.35 | 218  | MB1017c | hypothetical protein                                      | 70.8  | 218  | MAV_1099 | hypothetical protein                                      | 99.12 | 226 | BCG_1045c | hypothetical protein                                      | 70.8  | 218  | MAP0921c | hypothetical protein                               | 226    | 100   |
| MAP4_2940 | large-conductance ion mechanoinsensitive channel subunit  | 151 | Rv0988c | Possible large-conductance ion mechanoinsensitive channel subunit | 78.15 | 151  | MB1011c | large-conductance mechanosensitive channel subunit        | 78.15 | 151  | MAV_1098 | large-conductance mechanosensitive channel subunit        | 100   | 151 | BCG_1040c | large-conductance mechanosensitive channel subunit        | 77.48 | 151  | MAP0920c | large-conductance mechanosensitive channel subunit | 151    | 100   |
| MAP4_2941 | beta-alpha-carbonylamine dehydratase MaaB2                | 485 | Rv0987c | Probable beta-alpha-carbonylamine dehydratase                     | 98.38 | 481  | MB1010c | beta-alpha-carbonylamine dehydratase                      | 98.38 | 481  | MAV_1097 | beta-aldobutem cofactor synthesis protein                 | 99.39 | 465 | BCG_1039  | beta-alpha-carbonylamine dehydratase                      | 98.38 | 481  | MAP0919  | hypothetical protein                               | 485    | 100   |
| MAP4_2942 | putative serine protease PcpD                             | 76  | Rv0983  | Probable serine protease PcpD (ser)                               | 76.4  | 464  | MB1009  | serine protease                                           | 76.63 | 464  | MAV_1096 | serine protease                                           | 99.8  | 488 | BCG_1038  | serine protease                                           | 76.63 | 464  | MAP0918  | hypothetical protein                               | 76     | 100   |
| MAP4_2943 | two component system sensor kinase mprB                   | 52  | Rv0982  | Two component system sensor kinase                                | 84.51 | 504  | MB1008  | two component sensor kinase                               | 84.51 | 504  | MAV_1095 | sensor histidine kinase                                   | 99.49 | 508 | BCG_1037  | two component sensor kinase                               | 84.51 | 504  | MAP0917  | hypothetical protein                               | 52     | 99.8  |
| MAP4_2944 | two component response transcriptional regulatory protein | 27  | Rv0981  | Mycobacterial persistence regulator                               | 97.81 | 228  | MB1007  | two component response transcriptional regulatory protein | 97.81 | 228  | MAV_1094 | two component response transcriptional regulatory protein | 100   | 228 | BCG_1036  | two component response transcriptional regulatory protein | 97.81 | 228  | MAP0916  | hypothetical protein                               | 27     | 100   |
| MAP4_2945 | S05 ribosomal protein L32                                 | 57  | Rv0979A | S05 ribosomal protein L32 RpmF                                    | 85.96 | 57   | MB1005  | S05 ribosomal protein L32                                 | 85.96 | 57   | MAV_1093 | S05 ribosomal protein L32                                 | 98.25 | 57  | BCG_1034  | S05 ribosomal protein L32                                 | 85.96 | 57   | MAP0915  | S05 ribosomal protein L32                          | 57     | 100   |
| MAP4_2946 | hypothetical protein                                      | 573 | Rv0978c | hypothetical protein                                              | 85.16 | 573  | MB1004c | hypothetical protein                                      | 85.16 | 573  | MAV_1092 | hypothetical protein                                      | 98.96 | 573 | BCG_1033  | hypothetical protein                                      | 85.16 | 573  | MAP0914  | hypothetical protein                               | 573    | 100   |
| MAP4_2947 | acyl-CoA dehydrogenase                                    | 539 | Rv0975c | Probable acyl-CoA dehydrogenase F                                 | 90.93 | 539  | MB1000c | acyl-CoA dehydrogenase                                    | 90.83 | 539  | MAV_1091 | acyl-CoA dehydrogenase                                    | 99.74 | 539 | BCG_1029c | acyl-CoA dehydrogenase                                    | 90.93 | 539  | MAP0913c | hypothetical protein                               | 539    | 100   |
| MAP4_2948 | acyl-propionyl-CoA carboxylase beta subunit accD2         | 51  | Rv0974c | Probable acetyl-propionyl-CoA carboxylase                         | 95.38 | 529  | MB0999c | acetyl-propionyl-CoA carboxylase                          | 95.12 | 529  | MAV_1090 | acyl-CoA carboxylase carboxylase                          | 98.49 | 531 | BCG_1028c | acyl-propionyl-CoA carboxylase                            | 95.12 | 529  | MAP0912c | accD2                                              | 51     | 99.81 |
| MAP4_2949 | acyl-propionyl-CoA carboxylase alpha subunit accA2        | 68  | Rv0973c | Probable acetyl-propionyl-coenzyme A carboxylase                  | 82.21 | 667  | MB0998c | acetyl-propionyl-coenzyme A carboxylase                   | 82.06 | 667  | MAV_1089 | carbamoyl-phosphate synthase L4                           | 99.1  | 663 | BCG_1027c | acetyl-propionyl-coenzyme A carboxylase                   | 82.06 | 667  | MAP0911c | hypothetical protein                               | 68     | 100   |
| MAP4_2950 | acyl-CoA dehydrogenase FadE12                             | 363 | Rv0972c | Acyl-CoA dehydrogenase FadE12                                     | 89.69 | 388  | MB0997c | acyl-CoA dehydrogenase                                    | 89.43 | 388  | MAV_1088 | acyl-CoA dehydrogenase FadE12                             | 99.48 | 388 | BCG_1026c | acyl-CoA dehydrogenase FadE12                             | 89.43 | 388  | MAP0910c | FadE12                                             | 363    | 100   |
| MAP4_2951 | enoyl-CoA hydratase                                       | 263 | Rv0971c | Probable enoyl-CoA hydratase Echa                                 | 83.27 | 269  | MB0996c | enoyl-CoA hydratase                                       | 83.27 | 269  | MAV_1087 | enoyl-CoA hydratase                                       | 98.48 | 263 | BCG_1025c | enoyl-CoA hydratase                                       | 83.27 | 269  | MAP0909c | enoyl-CoA hydratase                                | 263    | 100   |
| MAP4_2952 | hypothetical protein                                      | 203 | Rv0966c | hypothetical protein                                              | 81.91 | 200  | MB0991c | hypothetical protein                                      | 81.91 | 200  | MAV_1086 | hypothetical protein                                      | 99.5  | 203 | BCG_1020c | hypothetical protein                                      | 81.91 | 200  | MAP0908c | hypothetical protein                               | 203    | 100   |
| MAP4_2953 | putative oxidoreductase, Aldoketo reductase family        | 282 | Rv2981  | Probable oxidoreductase                                           | 42.34 | 282  | MB2996  | oxidoreductase                                            | 42.7  | 282  | MAV_1085 | morphine-6-dehydrogenase                                  | 97.87 | 282 | BCG_2903  | oxidoreductase                                            | 42.7  | 282  | MAP0907  | hypothetical protein                               | 282    | 100   |
| MAP4_2954 | hypothetical protein                                      | 661 | Rv0959  | hypothetical protein                                              | 89.53 | 672  | MB0984  | hypothetical protein                                      | 89.53 | 672  | MAV_1084 | von Willebrand factor type A                              | 99.37 | 638 | BCG_1013  | hypothetical protein                                      | 89.53 | 672  | MAP0906  | hypothetical protein                               | 661    | 100   |
| MAP4_2955 | magnesium chelatase                                       | 46  | Rv0958  | Possible magnesium chelatase                                      | 92.41 | 459  | MB0983  | magnesium chelatase                                       | 92.62 | 459  | MAV_1082 | ATPase                                                    | 25.19 | 327 | BCG_1012  | magnesium chelatase                                       | 92.62 | 459  | MAP0905  | hypothetical protein                               | 46     | 100   |
| MAP4_2956 | transmembrane protein                                     | 246 | Rv2721c | Probable conserved transmembrane protein                          | 38.05 | 609  | MB1027c | hypothetical protein                                      | 38.05 | 609  | MAV_1081 | hypothetical protein                                      | 98.36 | 402 | BCG_1011  | transmembrane alanine and glycine transferase             | 38.05 | 609  | MAP0904  | hypothetical protein                               | 246    | 100   |
| MAP4_2957 | bifunctional purine biosynthesis protein purH             | 513 | Rv0956  | Probable bifunctional purine biosynthesis protein                 | 86.34 | 523  | MB0982  | bifunctional phosphoribosylamine dehydratase              | 86.34 | 523  | MAV_1081 | bifunctional phosphoribosylamine dehydratase              | 99.49 | 533 | BCG_1011  | bifunctional phosphoribosylamine dehydratase              | 86.34 | 523  | MAP0903  | bifunctional phosphoribosylamine dehydratase       | 513    | 99.81 |
| MAP4_2958 | 5-phosphoribosylglycinamide formyl transferase purN       | 209 | Rv0955  | Probable 5-phosphoribosylglycinamide formyl transferase           | 82.3  | 215  | MB0980  | phosphoribosylglycinamide formyl transferase              | 82.3  | 215  | MAV_1080 | phosphoribosylglycinamide formyl transferase              | 100   | 209 | BCG_1010  | phosphoribosylglycinamide formyl transferase              | 82.3  | 215  | MAP0902  | phosphoribosylglycinamide formyl transferase       | 209    | 100   |
| MAP4_2959 | putative conserved membrane protein                       | 466 | Rv0955  | Probable conserved integral membrane protein                      | 80.31 | 455  | MB0980  | hypothetical protein                                      | 80.31 | 455  | MAV_1079 | hypothetical protein                                      | 98.06 | 463 | BCG_1009  | integral membrane protein                                 | 80.31 | 455  | MAP0901  | hypothetical protein                               | 466    | 100   |
| MAP4_2960 | putative conserved membrane protein                       | 278 | Rv0954  | Probable conserved transmembrane protein                          | 56.57 | 303  | MB0979  | transmembrane protein                                     | 56.57 | 303  | MAV_1078 | 34 kDa antigenic protein                                  | 99.42 | 302 | BCG_1008  | hyp                                                       |       |      |          |                                                    |        |       |

Table S1 continued

|           |                                                              |     |         |                                              |       |      |          |                                       |       |      |          |                                             |       |     |           |                                       |       |      |          |                                         |     |       |
|-----------|--------------------------------------------------------------|-----|---------|----------------------------------------------|-------|------|----------|---------------------------------------|-------|------|----------|---------------------------------------------|-------|-----|-----------|---------------------------------------|-------|------|----------|-----------------------------------------|-----|-------|
| MAP4_2014 | hypothetical protein                                         | 128 | Rv2524c | Probable fatty acid synthase Fas (fat)       | 29.85 | 3069 | MB2553c  | fatty acid synthase                   | 29.85 | 3069 | MVW_1036 | hypothetical protein                        | 98.44 | 128 | BCG_2545c | fatty acid synthase fas               | 29.85 | 3069 | MAP0848  | hypothetical protein                    | 128 | 100   |
| MAP4_2013 | hypothetical protein                                         | 539 | Rv1754c | Probable fatty acid synthase II CFA          | 61.48 | 563  | MB1783c  | hypothetical protein                  | 61.48 | 563  | MVW_1035 | hypothetical protein                        | 100   | 527 | BCG_1793c | hypothetical protein                  | 61.29 | 563  | MAP0847  | hypothetical protein                    | 539 | 100   |
| MAP4_2012 | hypothetical protein                                         | 144 | Rv0912c | Probable conserved transmembrane             | 78.71 | 149  | MB0930   | transmembrane protein                 | 78.71 | 149  | MVW_1034 | hypothetical protein                        | 99.72 | 128 | BCG_0964  | hypothetical protein                  | 78.71 | 149  | MAP0846  | hypothetical protein                    | 144 | 100   |
| MAP4_2015 | hypothetical protein                                         | 153 | Rv0910  | hypothetical protein                         | 84.62 | 144  | MB0934   | hypothetical protein                  | 84.62 | 144  | MVW_1033 | hypothetical protein                        | 100   | 153 | BCG_0962  | hypothetical protein                  | 84.62 | 144  | MAP0845  | hypothetical protein                    | 153 | 100   |
| MAP4_2016 | hypothetical protein                                         | 62  | Rv0909  | hypothetical protein                         | 62.5  | 59   | MB0933   | hypothetical protein                  | 62.5  | 59   | MVW_1032 | hypothetical protein                        | 100   | 62  | BCG_0961  | hypothetical protein                  | 62.29 | 59   | MAP0844  | hypothetical protein                    | 62  | 100   |
| MAP4_2017 | metal cation transporter ATPase P-type CtpE                  | 790 | Rv0908  | Probable metal cation transporter A          | 81.85 | 797  | MB0932   | metal cation transporter ATPase       | 81.85 | 797  | MVW_1031 | cation-transporting ATPase EtpE             | 98.99 | 790 | BCG_0960  | metal cation transporter atpase       | 81.85 | 797  | MAP0843  | CtpA                                    | 790 | 100   |
| MAP4_2018 | beta-lactamase-anticoagulant-binding protein                 | 528 | Rv0907  | hypothetical protein                         | 72.57 | 532  | MB0931   | hypothetical protein                  | 72.57 | 532  | MVW_1030 | penicillin-binding protein 4                | 99.09 | 528 | BCG_0959  | hypothetical protein                  | 72.21 | 528  | MAP0842  | hypothetical protein                    | 528 | 100   |
| MAP4_2019 | putative beta-lactamase superfamily protein                  | 369 | Rv0906  | hypothetical protein                         | 78.17 | 372  | MB0930   | hypothetical protein                  | 78.17 | 372  | MVW_1029 | penicillin-binding protein                  | 99.46 | 369 | BCG_0958  | hypothetical protein                  | 78.17 | 372  | MAP0841  | hypothetical protein                    | 369 | 100   |
| MAP4_2020 | enoyl-CoA hydratase                                          | 243 | Rv0905  | Possible enoyl-CoA hydratase EchaA           | 90.53 | 243  | MB0929   | enoyl-CoA hydratase                   | 90.53 | 243  | MVW_1028 | enoyl-CoA hydratase                         | 99.09 | 243 | BCG_0957  | enoyl-CoA hydratase                   | 90.53 | 243  | MAP0840  | enoyl-CoA hydratase                     | 243 | 100   |
| MAP4_2021 | acyl-CoA carboxylase carboxyl transferase subunit beta       | 490 | Rv0904c | Putative acetyl-coenzyme A carboxylase       | 83.98 | 495  | MB0928c  | acetyl-coenzyme A carboxylase         | 83.98 | 495  | MVW_1027 | propionyl-CoA carboxylase beta chain        | 24.07 | 546 | BCG_0956c | acetyl-coenzyme A carboxylase         | 83.98 | 495  | MAP0839c | AccC3                                   | 490 | 100   |
| MAP4_2022 | putative protein                                             | 137 | Rv1751  | Probable oxidoreductase                      | 48.65 | 460  | MB0909c  | hypothetical protein                  | 35.56 | 378  | MVW_2736 | hypothetical protein                        | 50    | 503 | BCG_0620c | hypothetical protein                  | 35.56 | 378  | MAP0838c | hypothetical protein                    | 137 | 100   |
| MAP4_2023 | putative glycogen debranching enzyme                         | 706 | Rv3130  | Triacylglycerol synthase (diacylglycerol)    | 28    | 463  | MB1354c  | hypothetical protein                  | 28    | 463  | MVW_1025 | hypothetical protein                        | 29    | 706 | BCG_3153c | hypothetical protein                  | 28    | 463  | MAP0837  | hypothetical protein                    | 706 | 100   |
| MAP4_2024 | putative glycosyltransferase                                 | 296 | Rv1124c | Putative glycosyl transferase CglaA          | 28.89 | 387  | MB1124c  | glycosyl transferase family protein   | 28.64 | 387  | MVW_1024 | glycosyl transferase, group I family        | 99.75 | 296 | BCG_1272c | glycosyl transferase family protein   | 28.64 | 387  | MAP0836  | hypothetical protein                    | 296 | 100   |
| MAP4_2025 | putative transporter, major facilitator super family protein | 424 | Rv2556c | Probable conserved integral membrane         | 37.98 | 418  | MB2483c  | integral membrane transport           | 37.98 | 418  | MVW_1023 | hypothetical protein                        | 99.75 | 424 | BCG_2476c | integral membrane transport           | 37.98 | 418  | MAP0835  | hypothetical protein                    | 424 | 100   |
| MAP4_2026 | two component system transcriptional regulator prA           | 233 | Rv0903c | Two component response trans                 | 97    | 236  | MVW_1022 | two component response trans          | 97    | 236  | MVW_1022 | PrfA family transcriptional regulator       | 100   | 233 | BCG_0955c | two component response trans          | 97    | 236  | MAP0834  | hypothetical protein                    | 233 | 100   |
| MAP4_2027 | two component system sensor histidine kinase prB             | 447 | Rv0902c | Two component sensor histidine kinase        | 82.51 | 446  | MB0926c  | two component sensor histidine kinase | 82.51 | 446  | MVW_1021 | sensor histidine kinase                     | 99.78 | 445 | BCG_0954c | two component sensor histidine kinase | 82.51 | 446  | MAP0833c | hypothetical protein                    | 447 | 99.51 |
| MAP4_2028 | Transposase, IS1601 B                                        | 405 | Rv2014  | Transposase                                  | 31.65 | 196  | MB0937   | transposase                           | 31.65 | 196  | MVW_1026 | transposase IS1616/IS110/IS902              | 46.4  | 404 | BCG_2031  | transposase                           | 31.65 | 196  | MAP0832c | IS1601_B_1 transposase                  | 405 | 100   |
| MAP4_2029 | hypothetical protein                                         | 87  | Rv0898c | hypothetical protein                         | 70.59 | 87   | MB0927c  | hypothetical protein                  | 70.59 | 87   | MVW_1020 | hypothetical protein                        | 100   | 87  | BCG_0950c | hypothetical protein                  | 70.59 | 87   | MAP0831c | hypothetical protein                    | 87  | 100   |
| MAP4_2030 | oxidoreductase                                               | 516 | Rv0897c | Probable oxidoreductase                      | 73.5  | 535  | MB0921c  | oxidoreductase                        | 73.5  | 535  | MVW_1019 | iron-sulfur hydroxylase                     | 97.67 | 516 | BCG_0948c | hypothetical protein                  | 73.5  | 535  | MAP0830c | hypothetical protein                    | 516 | 100   |
| MAP4_2031 | citrate synthase I                                           | 431 | Rv0896  | Probable citrate synthase I/GNA2             | 90.72 | 431  | MB0920   | type II citrate synthase              | 90.72 | 431  | MVW_0344 | citrate synthase                            | 33.42 | 375 | BCG_0948  | type II citrate synthase              | 90.72 | 431  | MAP0829  | type II citrate synthase                | 431 | 100   |
| MAP4_2032 | Pyridoxamine 5'-phosphate oxidase                            | 220 | Rv2607  | Pyridoxamine 5'-phosphate oxidase            | 69.16 | 224  | MB2639   | pyridoxamine 5'-phosphate oxidase     | 69.16 | 224  | MVW_1017 | pyridoxamine 5'-phosphate oxidase           | 99.03 | 207 | BCG_2632  | pyridoxamine 5'-phosphate oxidase     | 69.16 | 224  | MAP0828  | pyridoxamine 5'-phosphate oxidase       | 220 | 100   |
| MAP4_2033 | citrate synthase II                                          | 373 | Rv0889c | Probable citrate synthase II CFA             | 92.76 | 373  | MB0907c  | citrate synthase 2                    | 92.76 | 373  | MVW_1016 | citrate synthase 2                          | 100   | 373 | BCG_2943c | citrate synthase 2                    | 92.76 | 373  | MAP0827c | citrate synthase 2                      | 373 | 100   |
| MAP4_2034 | hypothetical protein                                         | 158 | Rv0887c | hypothetical protein                         | 81.08 | 152  | MB0911c  | hypothetical protein                  | 81.08 | 152  | MVW_1014 | lysozyme                                    | 100   | 158 | BCG_0938  | hypothetical protein                  | 81.08 | 152  | MAP0826c | hypothetical protein                    | 158 | 100   |
| MAP4_2035 | NADPH:adrenodoxin oxidoreductase FprB                        | 566 | Rv0886  | Probable NADPH:adrenodoxin oxidoreductase    | 79.02 | 575  | MB0910   | NADPH:adrenodoxin oxidoreductase      | 79.02 | 575  | MVW_1015 | ferredoxin/ferredoxin-NADP reductase        | 99.27 | 546 | BCG_0938  | NADPH:adrenodoxin oxidoreductase      | 79.02 | 575  | MAP0825  | FprB                                    | 566 | 100   |
| MAP4_2036 | P-aminobenzoate N-oxxygenase Aurf family protein             | 378 | Rv0885  | hypothetical protein                         | 88.72 | 340  | MB0909   | hypothetical protein                  | 88.72 | 340  | MVW_1013 | hypothetical protein                        | 99.7  | 336 | BCG_0937  | hypothetical protein                  | 88.41 | 340  | MAP0824  | hypothetical protein                    | 378 | 100   |
| MAP4_2037 | Phosphoserine aminotransferase                               | 374 | Rv0884c | Possible phosphoserine aminotransferase      | 85.11 | 376  | MB0908c  | phosphoserine aminotransferase        | 85.11 | 376  | MVW_1012 | phosphoserine aminotransferase              | 99.47 | 374 | BCG_0936c | phosphoserine aminotransferase        | 85.11 | 376  | MAP0823c | phosphoserine aminotransferase          | 374 | 100   |
| MAP4_2038 | hypothetical protein                                         | 254 | Rv0883c | hypothetical protein                         | 73.36 | 253  | MB0907c  | hypothetical protein                  | 73.36 | 253  | MVW_1011 | hypothetical protein                        | 96.14 | 259 | BCG_0935c | hypothetical protein                  | 73.36 | 253  | MAP0822c | hypothetical protein                    | 254 | 100   |
| MAP4_2039 | transmembrane protein                                        | 80  | Rv0882  | Probable transmembrane protein               | 83.58 | 80   | MB0906   | hypothetical protein                  | 83.58 | 80   | MVW_1010 | hypothetical protein                        | 99.47 | 80  | BCG_0934c | hypothetical protein                  | 83.58 | 80   | MAP0821c | hypothetical protein                    | 80  | 100   |
| MAP4_2040 | rRNA methyltransferase                                       | 289 | Rv0881  | Possible rRNA methyltransferase LR           | 82.72 | 288  | MB0905   | rRNA methyltransferase                | 83.09 | 288  | MVW_1009 | SpoU rRNA methylase                         | 98.56 | 432 | BCG_0934  | rRNA methyltransferase                | 83.09 | 288  | MAP0820  | hypothetical protein                    | 289 | 100   |
| MAP4_2041 | Transcriptional regulator, MarR family                       | 143 | Rv0880  | Possible transcriptional regulatory protein  | 86.01 | 143  | MB0904   | MarR family transcriptional regulator | 86.01 | 143  | MVW_1009 | SpoU rRNA methylase                         | 99.15 | 432 | BCG_0932  | MarR family transcriptional regulator | 86.01 | 143  | MAP0819  | hypothetical protein                    | 143 | 100   |
| MAP4_2042 | putative conserved transmembrane protein                     | 91  | Rv0879c | Possible conserved transmembrane protein     | 66.29 | 91   | MB0903c  | transmembrane protein                 | 66.29 | 91   | MVW_1008 | hypothetical protein                        | 100   | 91  | BCG_0931c | hypothetical protein                  | 66.29 | 91   | MAP0818c | hypothetical protein                    | 91  | 100   |
| MAP4_2043 | hypothetical protein                                         | 154 | Rv1883c | hypothetical protein                         | 30.41 | 153  | MB1915c  | hypothetical protein                  | 29.8  | 158  | MVW_1006 | hypothetical protein                        | 98.7  | 154 | BCG_1920c | hypothetical protein                  | 29.8  | 158  | MAP0817c | hypothetical protein                    | 154 | 100   |
| MAP4_2044 | hypothetical protein                                         | 87  | Rv0891  | hypothetical protein                         | 82.76 | 262  | MB0902   | hypothetical protein                  | 82.76 | 262  | MVW_1007 | hypothetical protein                        | 99.26 | 262 | BCG_0928  | hypothetical protein                  | 82.76 | 262  | MAP0816  | hypothetical protein                    | 87  | 100   |
| MAP4_2045 | hypothetical protein                                         | 166 | Rv0876c | Possible conserved transmembrane protein     | 58.38 | 166  | MB0900c  | hypothetical protein                  | 58.38 | 166  | MVW_1005 | hypothetical protein                        | 98.65 | 167 | BCG_0928  | hypothetical protein                  | 58.38 | 166  | MAP0815c | hypothetical protein                    | 166 | 100   |
| MAP4_2046 | hypothetical protein                                         | 310 | Rv0875c | Possible conserved exported protein          | 74.53 | 162  | MB0899c  | hypothetical protein                  | 74.53 | 162  | MVW_1004 | hypothetical protein                        | 98.8  | 297 | BCG_0927c | hypothetical protein                  | 74.53 | 162  | MAP0814  | hypothetical protein                    | 310 | 100   |
| MAP4_2047 | hypothetical protein                                         | 315 | Rv3555c | hypothetical protein                         | 51.6  | 289  | MB3585c  | hypothetical protein                  | 51.96 | 289  | MVW_1002 | hypothetical protein                        | 98.25 | 323 | BCG_3619c | hypothetical protein                  | 51.96 | 289  | MAP0813c | hypothetical protein                    | 315 | 100   |
| MAP4_2048 | putative glutathione S-transferase                           | 42  | Rv0865  | Possible myoglobin biosynthesis              | 42.86 | 160  | MB0889   | myoglobin biosynthesis 4              | 42.86 | 160  | MVW_1003 | glutathione S-transferase                   | 99.4  | 334 | BCG_0917  | myoglobin biosynthesis myoglobin      | 42.86 | 160  | MAP0812  | hypothetical protein                    | 42  | 100   |
| MAP4_2049 | acyl-CoA dehydrogenase                                       | 647 | Rv0873  | Probable acyl-CoA dehydrogenase F            | 85.67 | 650  | MB0897   | acyl-CoA dehydrogenase                | 85.67 | 650  | MVW_1001 | acyl-CoA dehydrogenase                      | 99.72 | 647 | BCG_0925  | acyl-CoA dehydrogenase                | 85.67 | 650  | MAP0811  | FadD10                                  | 647 | 100   |
| MAP4_2050 | colD shock protein B cspB                                    | 138 | Rv0871  | Probable colD shock-like protein B/CspB      | 88.89 | 135  | MB0899   | colD shock-like protein B/CspB        | 88.89 | 135  | MVW_1000 | colD shock-like protein-binding domain-cspB | 99.26 | 135 | BCG_0923  | colD shock-like protein B/CspB        | 88.89 | 135  | MAP0810  | colD shock-like protein B/CspB          | 138 | 100   |
| MAP4_2051 | hypothetical protein                                         | 135 | Rv0870  | Possible conserved integral membrane protein | 85.16 | 129  | MB0894c  | hypothetical protein                  | 85.16 | 129  | MVW_0999 | hypothetical protein                        | 99.26 | 135 | BCG_0922c | hypothetical protein                  | 85.16 | 129  | MAP0809c | hypothetical protein                    | 135 | 100   |
| MAP4_2052 | myoglobin cofactor biosynthesis protein MoaD                 | 93  | Rv0868c | Probable myoglobin cofactor biosynthesis     | 65.59 | 92   | MB0892c  | myoglobin cofactor biosynthesis       | 65.59 | 92   | MVW_0997 | This family protein                         | 96.77 | 92  | BCG_0920c | myoglobin cofactor biosynthesis       | 65.59 | 92   | MAP0808c | MoaD2                                   | 93  | 100   |
| MAP4_2054 | hypothetical protein                                         | 250 | Rv0867c | Possible resuscitation-promoting factor RpfD | 74.71 | 407  | MB1036   | resuscitation-promoting factor RpfD   | 60.91 | 362  | MVW_0996 | resuscitation-promoting factor RpfD         | 92.66 | 234 | BCG_0919c | resuscitation-promoting factor RpfD   | 74.71 | 407  | MAP0805c | hypothetical protein                    | 250 | 100   |
| MAP4_2053 | myoglobin cofactor biosynthesis protein E2MoaE2              | 141 | Rv0866  | Probable myoglobin cofactor biosynthesis     | 80    | 141  | MB0895   | myoglobin cofactor biosynthesis       | 80    | 141  | MVW_0995 | myoglobin cofactor biosynthesis             | 98.58 | 141 | BCG_0918  | myoglobin cofactor biosynthesis       | 80    | 141  | MAP0804  | MoaE2                                   | 141 | 100   |
| MAP4_2056 | myoglobin cofactor biosynthesis protein MoaB                 | 176 | Rv0865  | Probable myoglobin cofactor biosynthesis     | 76.25 | 160  | MB0889   | myoglobin cofactor biosynthesis       | 76.25 | 160  | MVW_0995 | myoglobin cofactor biosynthesis             | 99.38 | 160 | BCG_0917  | myoglobin cofactor biosynthesis       | 76.25 | 160  | MAP0803  | MoaB                                    | 176 | 100   |
| MAP4_2057 | myoglobin cofactor biosynthesis protein MoaC2                | 176 | Rv0864  | Probable myoglobin cofactor biosynthesis     | 85.82 | 142  | MB0888   | myoglobin cofactor biosynthesis       | 85.82 | 142  | MVW_0993 | myoglobin cofactor biosynthesis             | 99.3  | 142 | BCG_0916  | myoglobin cofactor biosynthesis       | 85.82 | 142  | MAP0802  | myoglobin cofactor biosynthesis protein | 176 | 100   |
| MAP4_2058 | hypothetical protein                                         | 87  | Rv0863  | hypothetical protein                         | 86.36 | 93   | MB0892   | hypothetical protein                  | 86.36 | 93   | MVW_0992 | hypothetical protein                        | 98.48 | 66  | BCG_0915  | hypothetical protein                  | 86.36 | 93   | MAP0801  | hypothetical protein                    | 87  | 100   |
| MAP4_2059 | hypothetical protein                                         | 752 | Rv0862c | hypothetical protein                         | 78.89 | 756  | MB0885c  | hypothetical protein                  | 80.03 | 756  | MVW_0991 | hypothetical protein                        | 98.67 | 752 | BCG_0914c | hypothetical protein                  | 78.89 | 756  | MAP0800c | hypothetical protein                    | 752 | 100   |
| MAP4_2060 | hypothetical protein                                         | 549 | Rv0861c | DNA helicase Frec3                           | 95.39 | 542  | MB0886   | DNA helicase                          | 95.2  | 542  | MVW_0990 | DNA or RNA helicase of superfamily III      | 98.64 | 549 | BCG_0913c | DNA helicase                          | 95.39 | 542  | MAP0799  | hypoth                                  |     |       |



Table S1 continued

|           |                                                      |     |         |                                       |       |     |         |                                   |       |     |         |                                     |       |     |           |                                 |       |     |          |                           |     |       |
|-----------|------------------------------------------------------|-----|---------|---------------------------------------|-------|-----|---------|-----------------------------------|-------|-----|---------|-------------------------------------|-------|-----|-----------|---------------------------------|-------|-----|----------|---------------------------|-----|-------|
| MAP4_3112 | putative conserved membrane protein                  | 461 | Rv1633c | Probable acyl-CoA dehydrogenase F     | 65.87 | 489 | Mb1666c | hypothetical protein              | 65.87 | 489 | MV_0936 | esterase                            | 97.14 | 454 | BCG_1678c | hypothetical protein            | 65.87 | 489 | MAP0749c | hypothetical protein      | 461 | 100   |
| MAP4_3113 | acyl-CoA dehydrogenase                               | 391 | Rv1934c | Probable acyl-CoA dehydrogenase F     | 34.72 | 409 | Mb1969c | acyl-CoA dehydrogenase            | 34.72 | 409 | MV_0935 | acyl-CoA dehydrogenase              | 98.98 | 391 | BCG_1973c | acyl-CoA dehydrogenase FadE     | 34.72 | 409 | MAP0748  | hypothetical protein      | 391 | 100   |
| MAP4_3114 | probable acyl-CoA dehydrogenase F                    | 315 | Rv1936c | Probable acyl-CoA dehydrogenase F     | 31.59 | 363 | Mb1972c | acyl-CoA dehydrogenase            | 31.59 | 363 | MV_0936 | acyl-CoA dehydrogenase              | 98.98 | 391 | BCG_1973c | acyl-CoA dehydrogenase FadE     | 31.59 | 363 | MAP0749  | hypothetical protein      | 315 | 100   |
| MAP4_3115 | putative dehydrogenase                               | 216 | Rv1938c | Possible oxidoreductase               | 27.27 | 214 | Mb1943c | oxidoreductase                    | 27.27 | 214 | MV_0933 | nitroreductase                      | 95.51 | 206 | BCG_3400c | nitroreductase                  | 27.27 | 214 | MAP0745c | hypothetical protein      | 216 | 100   |
| MAP4_3116 | putative carboxymuconolactone decarboxylase          | 128 | Rv1716  | hypothetical protein                  | 30    | 119 | Mb1796  | hypothetical protein              | 30    | 119 | MV_3552 | hypothetical protein                | 31.13 | 271 | BCG_2133  | lipoprotein Igpk                | 31.13 | 271 | MAP0745c | hypothetical protein      | 128 | 100   |
| MAP4_3117 | 3-hydroxyisobutyrate dehydrogenase                   | 297 | Rv0751c | 3-hydroxyisobutyrate dehydrogenase    | 33.33 | 294 | Mb0773c | 3-hydroxyisobutyrate dehydr       | 33.33 | 294 | MV_0931 | 3-hydroxyisobutyrate dehydrog       | 99.33 | 297 | BCG_0802c | 3-hydroxyisobutyrate dehydrog   | 33.33 | 294 | MAP0744c | hypothetical protein      | 297 | 100   |
| MAP4_3118 | amido/hydrolyase, amido/hydrolyase 2 family protein  | 366 | Rv1381  | Probable dihydroorotase PvcI (DHO)    | 48    | 430 | Mb0735  | riboflavin biosynthesis protein   | 25    | 353 | MV_0920 | amido/hydrolyase                    | 98.62 | 363 | BCG_1442c | dihydroorotase                  | 48    | 430 | MAP0743c | hypothetical protein      | 366 | 100   |
| MAP4_3119 | amido/hydrolyase, amido/hydrolyase 2 family protein  | 380 | Rv1927  | Mahlokinase Msk                       | 28.39 | 455 | Mb1932  | hypothetical protein              | 28.39 | 455 | MV_0929 | amido/hydrolyase                    | 98.74 | 380 | BCG_0151  | hypothetical protein            | 28.39 | 455 | MAP0742c | hypothetical protein      | 380 | 100   |
| MAP4_3120 | Rieske (ZFe-2S) domain-containing protein            | 137 | Rv1928  | Oxygenase component of 3-ketose       | 23.85 | 386 | Mb1956  | oxidoreductase                    | 23.85 | 386 | MV_0928 | Rieske (ZFe-2S) domain-containing   | 99.27 | 137 | BCG_3590  | oxidoreductase                  | 23.85 | 386 | MAP0741c | hypothetical protein      | 137 | 99.12 |
| MAP4_3121 | hypothetical protein                                 | 288 | Rv1232  | Possible peroxidase BpoB (non-haer)   | 22.42 | 302 | Mb1154c | peroxidase BpoB                   | 22.42 | 302 | MV_0927 | hypothetical protein                | 100   | 288 | BCG_0184  | peroxidase bpoB                 | 22.42 | 302 | MAP0740c | hypothetical protein      | 288 | 100   |
| MAP4_3122 | hypothetical protein                                 | 157 | Rv0271c | Probable acyl-CoA dehydrogenase F     | 28.85 | 731 | Mb0277c | acyl-CoA dehydrogenase            | 28.85 | 731 | MV_0926 | hypothetical protein                | 96.73 | 153 | BCG_0309c | acyl-CoA dehydrogenase FadE     | 28.85 | 731 | MAP0739  | hypothetical protein      | 157 | 100   |
| MAP4_3123 | putative respiratory chain NADH dehydrogenase I subu | 436 | Rv1350  | Probable NADH dehydrogenase I (ct)    | 31.25 | 445 | Mb1374  | NADH dehydrogenase I subu         | 31.25 | 445 | MV_0925 | respiratory chain NADH dehydrog     | 98.17 | 436 | BCG_3173  | NADH dehydrogenase I subunit    | 31.25 | 445 | MAP0738c | hypothetical protein      | 436 | 100   |
| MAP4_3124 | ferredoxin                                           | 98  | Rv3503c | Probable ferredoxin FdO               | 34.43 | 63  | Mb3533c | ferredoxin FdO                    | 34.43 | 63  | MV_0924 | hypothetical protein                | 100   | 98  | BCG_3567c | ferredoxin fdO                  | 34.43 | 63  | MAP0697  | hypothetical protein      | 98  | 37.88 |
| MAP4_3125 | putative monooxygenase, luciferase-like monooxygen   | 318 | Rv3520c | Possible centrose F420-dependent ox   | 29.29 | 347 | Mb3520c | coenzyme F420-dependent ox        | 29.29 | 347 | MV_0923 | hypothetical protein                | 98.74 | 318 | BCG_3584c | coenzyme F420-dependent ox      | 29.29 | 347 | MAP0737c | hypothetical protein      | 318 | 100   |
| MAP4_3126 | hypothetical protein                                 | 247 | Rv2970c | Probable lipase/esterase LipN         | 30.85 | 376 | Mb2994c | lipase/esterase                   | 30.85 | 376 | MV_0922 | hypothetical protein                | 98.38 | 247 | BCG_3846  | lipase/esterase lipN            | 30.85 | 376 | MAP0736  | hypothetical protein      | 247 | 100   |
| MAP4_3127 | NAD dependent epimerase/dehydratase family protein   | 336 | Rv3784  | Possible dTDP-glucose 4,6-dehydrat    | 25.52 | 326 | Mb3813  | dTDP-glucose 4,6-dehydrat         | 25.52 | 326 | MV_0921 | hypothetical protein                | 98.18 | 330 | BCG_3846  | dTDP-glucose 4,6-dehydratase    | 25.52 | 326 | MAP0735  | hypothetical protein      | 336 | 100   |
| MAP4_3128 | hypothetical protein                                 | 132 | Rv0982  | Two component sensor kinase MprE      | 29.49 | 504 | Mb1843c | hypothetical protein              | 55.56 | 115 | MV_0652 | acyl-CoA dehydrogenase              | 37.5  | 392 | BCG_1838c | hypothetical protein            | 55.56 | 115 | MAP0734  | hypothetical protein      | 132 | 100   |
| MAP4_3129 | hypothetical protein                                 | 550 | Rv3540c | Probable lipid transfer protein or he | 33.83 | 386 | Mb3570c | lipid-transfer protein            | 33.83 | 386 | MV_0919 | hypothetical protein                | 99.09 | 550 | BCG_3604c | lipid-transfer protein          | 33.83 | 386 | MAP0733c | hypothetical protein      | 550 | 100   |
| MAP4_3130 | hypothetical protein                                 | 328 | Rv1938  | Probable epoxide hydrolase EpiHc      | 30.34 | 356 | Mb1973  | epoxide hydrolase                 | 30.34 | 356 | MV_0918 | hypothetical protein                | 93.6  | 344 | BCG_1977  | epoxide hydrolase epiH          | 30.34 | 356 | MAP0732c | hypothetical protein      | 328 | 100   |
| MAP4_3131 | 6-phosphogluconate dehydrogenase                     | 271 | Rv0770  | Probable dehydrogenase/reduct         | 36.71 | 295 | Mb0793  | dehydrogenase/reductase           | 36.71 | 295 | MV_0917 | 6-phosphogluconate dehydrogena      | 98.89 | 271 | BCG_0822  | dehydrogenase/reductase         | 36.71 | 295 | MAP0731c | hypothetical protein      | 272 | 100   |
| MAP4_3132 | putative cytochrome P450 hydroxylase                 | 401 | Rv0766c | Probable cytochrome P450 123 Cyp      | 38.69 | 402 | Mb0789c | cytochrome P450 123               | 38.69 | 402 | MV_0916 | cytochrome P450 monooxygenase       | 99.25 | 401 | BCG_0818c | cytochrome P450 123 cyp123      | 38.69 | 402 | MAP0730c | hypothetical protein      | 401 | 100   |
| MAP4_3133 | ferredoxin                                           | 66  | Rv3503c | Probable ferredoxin FdO               | 40.68 | 63  | Mb3533c | ferredoxin FdO                    | 40.68 | 63  | MV_0915 | hypothetical protein                | 100   | 66  | BCG_3567c | ferredoxin fdO                  | 40.68 | 63  | MAP0729c | hypothetical protein      | 66  | 100   |
| MAP4_3134 | hypothetical protein                                 | 97  | Rv3759c | Probable ferredoxin FdO               | 45.16 | 199 | Mb3781c | hypothetical protein              | 45.16 | 199 | MV_0914 | hypothetical protein                | 98.97 | 97  | BCG_3814c | hypothetical protein            | 45.16 | 199 | MAP0728  | hypothetical protein      | 97  | 100   |
| MAP4_3135 | ferredoxin                                           | 62  | Rv3503c | Probable ferredoxin FdO               | 41.67 | 63  | Mb3533c | ferredoxin FdO                    | 41.67 | 63  | MV_0913 | hypothetical protein                | 100   | 62  | BCG_3567c | ferredoxin fdO                  | 41.67 | 63  | MAP0727c | hypothetical protein      | 66  | 51.67 |
| MAP4_3136 | putative cytochrome P450 hydroxylase                 | 424 | Rv1777  | Probable cytochrome P450 144 Cyp      | 31.73 | 434 | Mb1806  | cytochrome p450 144 CYP144        | 31.73 | 434 | MV_0912 | cytochrome p450                     | 100   | 424 | BCG_1810  | cytochrome p450 144 CYP144      | 31.73 | 434 | MAP0727  | hypothetical protein      | 424 | 100   |
| MAP4_3137 | hypothetical protein                                 | 175 | Rv0893c | Possible 5-adenosylmethionine-dep     | 50    | 325 | Mb0917c | hypothetical protein              | 50    | 325 | MV_0911 | hypothetical protein                | 100   | 175 | BCG_0945c | hypothetical protein            | 50    | 325 | MAP0726  | hypothetical protein      | 175 | 100   |
| MAP4_3138 | Transcriptional regulator, TetR family               | 204 | Rv0302  | Probable transcriptional regulato     | 33.33 | 210 | Mb0310  | TetR/ACR family transcript        | 33.33 | 210 | MV_0910 | TetR family transcriptional regulat | 100   | 204 | BCG_0342  | TetR family transcriptional reg | 33.33 | 210 | MAP0725  | hypothetical protein      | 204 | 100   |
| MAP4_3139 | Acetyl-CoA acetyltransferase                         | 384 | Rv1566  | Probable acyl-CoA acetyltransfer      | 35.63 | 386 | Mb1566  | acetyl-CoA acetyltransferase      | 35.63 | 386 | MV_0909 | acetyl-CoA acetyltransferase        | 98.93 | 386 | BCG_0676  | acetyl-CoA acetyltransferase    | 35.63 | 386 | MAP0724  | hypothetical protein      | 384 | 100   |
| MAP4_3140 | acyl-CoA dehydrogenase                               | 384 | Rv0972c | Acyl-CoA dehydrogenase FadI2          | 25.57 | 388 | Mb0979c | acyl-CoA dehydrogenase            | 25.57 | 388 | MV_0908 | acyl-CoA dehydrogenase FadI2        | 35.71 | 388 | BCG_1008c | acyl-CoA dehydrogenase FadE     | 25.57 | 388 | MAP0723  | FadE 1                    | 384 | 100   |
| MAP4_3141 | putative amido/hydrolyase 2                          | 432 | Rv3104c | Probable amido/hydrolyase             | 22.54 | 278 | Mb0940  | hypothetical protein              | 22.54 | 278 | MV_0907 | amido/hydrolyase                    | 99.77 | 432 | BCG_3574c | hypothetical protein            | 22.54 | 278 | MAP0722  | hypothetical protein      | 432 | 100   |
| MAP4_3142 | hypothetical protein                                 | 177 | Rv1531  | hypothetical protein                  | 28.57 | 188 | Mb1558  | hypothetical protein              | 28.57 | 188 | MV_0906 | hypothetical protein                | 99.44 | 177 | BCG_1583  | hypothetical protein            | 28.57 | 188 | MAP0721c | hypothetical protein      | 177 | 100   |
| MAP4_3143 | putative dioxygenase, Rieske (ZFe-2S) domain-contain | 427 | Rv3161c | Possible dioxygenase                  | 32.08 | 382 | Mb1886c | dioxygenase                       | 32.08 | 382 | MV_0905 | Rieske (ZFe-2S) domain-containing   | 99.53 | 427 | BCG_1583  | dioxygenase                     | 32.08 | 382 | MAP0720c | hypothetical protein      | 427 | 100   |
| MAP4_3144 | hypothetical protein                                 | 108 | Rv1938  | Probable hydroxyisocitrate lyase Pu   | 33.92 | 472 | Mb1938  | hydroxyisocitrate lyase           | 33.92 | 472 | MV_0904 | hydroxyisocitrate lyase             | 99.09 | 108 | BCG_0829  | hydroxyisocitrate lyase         | 33.92 | 472 | MAP0719c | hypothetical protein      | 108 | 100   |
| MAP4_3145 | putative hydrolase                                   | 408 | Rv2915c | hypothetical protein                  | 29.3  | 370 | Mb2915c | hypothetical protein              | 29.3  | 370 | MV_0903 | Pro dipeptidase                     | 99.27 | 408 | BCG_2986c | hypothetical protein            | 29.3  | 370 | MAP0718c | hypothetical protein      | 408 | 100   |
| MAP4_3146 | hypothetical protein                                 | 149 | Rv2910c | hypothetical protein                  | 34.59 | 147 | Mb2940c | hypothetical protein              | 34.59 | 147 | MV_0902 | hypothetical protein                | 100   | 149 | BCG_2939  | hypothetical protein            | 34.59 | 147 | MAP0717c | hypothetical protein      | 149 | 100   |
| MAP4_3147 | Acyl-CoA dehydrogenase                               | 379 | Rv3560c | Probable acyl-CoA dehydrogenase F     | 37.88 | 385 | Mb3590c | acyl-CoA dehydrogenase            | 37.88 | 385 | MV_0901 | acyl-CoA dehydrogenase              | 99.06 | 365 | BCG_3624c | acyl-CoA dehydrogenase FadE     | 37.88 | 385 | MAP0716c | hypothetical protein      | 379 | 100   |
| MAP4_3148 | putative acyl-CoA dehydrogenase                      | 252 | Rv0271c | Probable acyl-CoA dehydrogenase F     | 36.23 | 731 | Mb0277c | acyl-CoA dehydrogenase            | 36.23 | 731 | MV_0900 | acyl-CoA dehydrogenase              | 98.9  | 272 | BCG_0309c | acyl-CoA dehydrogenase FadE     | 36.23 | 731 | MAP0715c | hypothetical protein      | 252 | 100   |
| MAP4_3149 | hypothetical protein                                 | 89  | Rv3761c | Probable acyl-CoA dehydrogenase F     | 35.29 | 351 | Mb3787c | acyl-CoA dehydrogenase            | 35.29 | 351 | MV_0899 | hypothetical protein                | 100   | 89  | BCG_3827c | acyl-CoA dehydrogenase FadE     | 35.29 | 351 | MAP0714c | hypothetical protein      | 89  | 100   |
| MAP4_3150 | putative acyl-CoA dehydrogenase                      | 311 | Rv3560c | Probable acyl-CoA dehydrogenase F     | 38.23 | 385 | Mb3590c | acyl-CoA dehydrogenase            | 38.23 | 385 | MV_0898 | acyl-CoA dehydrogenase              | 99.49 | 391 | BCG_3624c | acyl-CoA dehydrogenase FadE     | 38.23 | 385 | MAP0713c | hypothetical protein      | 311 | 99.74 |
| MAP4_3151 | Transcriptional regulator, TetR family               | 279 | Rv3208  | Probable transcriptional regulato     | 27.94 | 228 | Mb3233  | TetR family transcriptional regul | 27.94 | 228 | MV_0896 | hypothetical protein                | 34.22 | 343 | BCG_3234  | TetR family transcriptional reg | 27.94 | 228 | MAP0712c | hypothetical protein      | 279 | 100   |
| MAP4_3152 | Probable dehydrogenase                               | 282 | Rv2150  | Probable dehydrogenase                | 48.23 | 272 | Mb2177  | 3-ketoacyl-ACP reductase          | 48.23 | 272 | MV_0895 | carveol dehydrogenase               | 100   | 282 | BCG_2766  | 3-ketoacyl-ACP reductase        | 48.23 | 272 | MAP0711c | hypothetical protein      | 282 | 99.65 |
| MAP4_3153 | short-chain dehydrogenase                            | 280 | Rv0851c | Probable short-chain type dehydrog    | 76.62 | 275 | Mb0874c | short chain dehydrogenase         | 76.62 | 275 | MV_0895 | short chain dehydrogenase           | 100   | 280 | BCG_0903c | short chain dehydrogenase       | 76.62 | 275 | MAP0710c | short chain dehydrogenase | 280 | 100   |
| MAP4_3154 | short chain dehydrogenase/reductase family oxidoredu | 209 | Rv1928c | Probable short-chain type dehydrog    | 35.92 | 255 | Mb1928c | short chain dehydrogenase         | 35.92 | 255 | MV_0894 | oxidoreductase, short chain dehyd   | 98.88 | 209 | BCG_1967c | short chain dehydrogenase       | 35.92 | 255 | MAP0709  | hypothetical protein      | 209 | 100   |
| MAP4_3155 | CoA-transferase family III protein                   | 815 | Rv1866  | hypothetical protein                  | 27.98 | 778 | Mb1897  | hypothetical protein              | 27.98 | 778 | MV_0893 | hypothetical protein                | 98.51 | 809 | BCG_1702  | hypothetical protein            | 27.98 | 778 | MAP0708  | hypothetical protein      | 815 | 100   |
| MAP4_3156 | peptidase, M24 family protein                        | 375 | Rv2535c | Probable cytoplasmic peptidase Pep    | 25.78 | 372 | Mb2564c | peptidase, M24 family protein     | 25.78 | 372 | MV_0892 | peptidase, M24 family protein       | 98.93 | 375 | BCG_2557c | cytoplasmic peptidase pepQ      | 25.78 | 372 | MAP0707  | hypothetical protein      | 375 | 100   |
| MAP4_3157 | peptidase, M24 family protein                        | 417 | Rv2089c | Dipeptidase PepE                      | 26.85 | 375 | Mb2116c | dipeptidase PepE                  | 26.85 | 375 | MV_0891 | peptidase, M24 family protein       | 100   | 417 | BCG_2109c | dipeptidase PepE                | 26.85 | 375 | MAP0706  | hypothetical protein      | 417 | 99.74 |
| MAP4_3158 | putative amido/hydrolyase                            | 390 | Rv1551  | Possible acetyltransferase PfbB       | 25.27 | 621 | Mb1577  | glycerol-3-phosphate acyltr       | 25.27 | 621 | MV_0890 | amido/hydrolyase                    | 99.72 | 393 | BCG_1603  |                                 |       |     |          |                           |     |       |



# Table S1 continued

|           |                                                           |       |         |                                                                |       |      |         |                                        |       |      |         |                                               |       |     |           |                                        |       |      |          |                                     |       |     |
|-----------|-----------------------------------------------------------|-------|---------|----------------------------------------------------------------|-------|------|---------|----------------------------------------|-------|------|---------|-----------------------------------------------|-------|-----|-----------|----------------------------------------|-------|------|----------|-------------------------------------|-------|-----|
| MAP4_3100 | ferredoxin                                                | 63    | Rv3503c | Probable ferredoxin Fx0D                                       | 93.65 | 63   | MV_0533 | ferredoxin Fx0D                        | 93.65 | 63   | MV_0533 | ferredoxin Fx0D                               | 93.65 | 63  | MAP0560   | Fx0D                                   | 93.65 | 63   | 100      |                                     |       |     |
| MAP4_3308 | acyl-CoA dehydrogenase FadE26                             | 392   | Rv3504  | Probable acyl-CoA dehydrogenase F                              | 88.16 | 400  | Mb3534  | acyl-CoA dehydrogenase                 | 88.16 | 400  | MV_0652 | acyl-CoA dehydrogenase                        | 99.74 | 392 | BCG_3568  | acyl-CoA dehydrogenase FadE26          | 88.16 | 400  | MAP0596  | acyl-CoA dehydrogenase FadE26       | 88.16 | 400 |
| MAP4_3311 | acyl-CoA synthetase FadD17                                | 503   | Rv3506  | Fatty-acyl-CoA synthetase FadD17                               | 43.97 | 502  | Mb3535  | acyl-CoA synthetase                    | 43.97 | 502  | MV_0644 | acyl-CoA synthetase                           | 99.63 | 503 | BCG_3570  | acyl-CoA synthetase                    | 43.97 | 502  | MAP0597  | acyl-CoA synthetase FadD17          | 43.97 | 502 |
| MAP4_3312 | hypothetical protein                                      | 70    | Rv1619  | hypothetical protein                                           | 33.33 | 494  | Mb1845  | hypothetical protein                   | 33.33 | 494  | MV_0640 | hypothetical protein                          | 98.57 | 93  | BCG_3582  | hypothetical protein                   | 33.33 | 494  | MAP0555  | hypothetical protein                | 33.33 | 494 |
| MAP4_3313 | hypothetical protein                                      | 250   | Rv3505  | PPE family protein PPE8                                        | 30.65 | 3300 | Mb3062c | PPE family protein                     | 30.65 | 3307 | MV_0647 | hypothetical protein                          | 99.58 | 237 | BCG_3583  | PPE family protein                     | 30.65 | 3507 | MAP0554  | hypothetical protein                | 252   | 100 |
| MAP4_3315 | putative amidohydrolase 2                                 | 275   | Rv3510c | hypothetical protein                                           | 85.66 | 278  | Mb3240c | hypothetical protein                   | 85.66 | 278  | MV_0646 | amidohydrolase                                | 99.27 | 275 | BCG_3574c | hypothetical protein                   | 85.66 | 278  | MAP0552  | hypothetical protein                | 275   | 100 |
| MAP4_3316 | fructoseamine kinase family protein                       | 275   | Rv2079  | hypothetical protein                                           | 25.31 | 656  | Mb2105  | hypothetical protein                   | 27.92 | 656  | MV_0645 | phosphotransferase enzyme family              | 99.22 | 275 | BCG_3584  | hypothetical protein                   | 27.92 | 656  | MAP0551  | hypothetical protein                | 275   | 100 |
| MAP4_3317 | fatty-acyl-CoA ligase FadD19 (fatty)                      | 546   | Rv3515c | fatty-acyl-CoA ligase FadD19 (fatty)                           | 90.11 | 548  | Mb3544c | acyl-CoA synthetase                    | 90.11 | 548  | MV_0644 | acyl-CoA synthetase                           | 99.63 | 546 | BCG_3578c | acyl-CoA synthetase                    | 90.11 | 548  | MAP0550  | acyl-CoA synthetase                 | 546   | 100 |
| MAP4_3318 | enoyl-CoA hydratase EchaA                                 | 270   | Rv3516  | possible enoyl-CoA hydratase EchaA                             | 91.6  | 263  | Mb3545  | enoyl-CoA hydratase                    | 91.96 | 263  | MV_0643 | enoyl-CoA hydratase                           | 99.20 | 270 | BCG_3579  | enoyl-CoA hydratase                    | 91.96 | 263  | MAP0548  | enoyl-CoA hydratase                 | 270   | 100 |
| MAP4_3319 | hypothetical protein                                      | 290   | Rv3517  | hypothetical protein                                           | 67.38 | 279  | Mb3546  | hypothetical protein                   | 67.38 | 279  | MV_0642 | hypothetical protein                          | 98.28 | 290 | BCG_3580  | hypothetical protein                   | 67.38 | 279  | MAP0546  | hypothetical protein                | 290   | 100 |
| MAP4_3320 | putative cytochrome P450 hydroxylase Cyp142               | 406   | Rv3518c | Probable cytochrome P450 monooxygenase                         | 80.51 | 398  | Mb3547c | cytochrome P450 monooxygenase          | 83.85 | 398  | MV_0641 | P450 heme-thiolate protein                    | 100   | 406 | BCG_3581c | cytochrome P450 monooxygenase          | 83.85 | 398  | MAP0547  | hypothetical protein                | 406   | 100 |
| MAP4_3321 | acetate decarboxylase (ADC) family protein                | 240   | Rv3919  | hypothetical protein                                           | 69.87 | 236  | Mb3549  | hypothetical protein                   | 69.87 | 236  | MV_0640 | hypothetical protein                          | 100   | 246 | BCG_3583  | hypothetical protein                   | 69.87 | 236  | MAP0546  | hypothetical protein                | 240   | 100 |
| MAP4_3322 | putative coenzyme F420-dependent oxidoreductase           | 86.01 | Rv3520c | possible coenzyme F420-dependent oxidoreductase                | 86.01 | 347  | Mb3550  | coenzyme F420-dependent oxidoreductase | 86.01 | 347  | MV_0640 | coenzyme F420-dependent oxidoreductase        | 98.54 | 344 | BCG_3584  | coenzyme F420-dependent oxidoreductase | 86.01 | 347  | MAP0545  | hypothetical protein                | 343   | 100 |
| MAP4_3323 | hypothetical protein                                      | 83.83 | Rv3521  | hypothetical protein                                           | 83.83 | 303  | Mb3551  | hypothetical protein                   | 83.83 | 303  | MV_0638 | hypothetical protein                          | 99.69 | 322 | BCG_3585  | hypothetical protein                   | 83.83 | 303  | MAP0544  | hypothetical protein                | 344   | 100 |
| MAP4_3324 | lipid transfer protein or keto acyl-CoA thiolase Ltp3     | 344   | Rv3522  | Possible lipid transfer protein or keto acyl-CoA thiolase Ltp3 | 88.95 | 354  | Mb3552  | lipid-transfer protein                 | 88.95 | 354  | MV_0637 | lipid-transfer protein                        | 100   | 354 | BCG_3586  | lipid-transfer protein                 | 88.95 | 354  | MAP0543  | lipid-transfer protein              | 354   | 100 |
| MAP4_3325 | lipid carrier protein or keto acyl-CoA thiolase Ltp3      | 397   | Rv3523  | Probable lipid carrier protein or keto acyl-CoA thiolase Ltp3  | 91.71 | 394  | Mb3553  | acyl-CoA acetyltransferase             | 91.71 | 394  | MV_0636 | acyl-CoA acetyltransferase                    | 99.75 | 397 | BCG_3587  | acyl-CoA acetyltransferase             | 91.71 | 394  | MAP0542  | acyl-CoA acetyltransferase          | 397   | 100 |
| MAP4_3326 | hypothetical protein                                      | 135   | Rv0760c | hypothetical protein                                           | 38.1  | 139  | Mb3560  | hypothetical protein                   | 38.1  | 139  | MV_0635 | hypothetical protein                          | 98.52 | 135 | BCG_3588  | hypothetical protein                   | 38.1  | 139  | MAP0541  | hypothetical protein                | 135   | 100 |
| MAP4_3327 | putative siderophore-binding protein                      | 83.33 | Rv3525c | possible siderophore-binding protein                           | 83.33 | 174  | Mb3555c | siderophore-binding protein            | 83.33 | 174  | MV_0634 | laminine operon protein CafE                  | 100   | 174 | BCG_3598  | siderophore-binding protein            | 83.33 | 174  | MAP0540  | hypothetical protein                | 174   | 100 |
| MAP4_3328 | oxidoreductase, Rieske (Zn-F2S) domain-containing protein | 145   | Rv3526c | Oxygenase component of 3-ketosteroid reductase                 | 90.93 | 385  | Mb3556  | oxidoreductase                         | 90.93 | 385  | MV_0633 | Rieske (Zn-F2S) domain-containing protein     | 99.74 | 145 | BCG_3590  | oxidoreductase                         | 90.93 | 385  | MAP1434  | hypothetical protein                | 145   | 100 |
| MAP4_3329 | hypothetical protein                                      | 77.08 | Rv3527  | hypothetical protein                                           | 77.08 | 149  | Mb3557  | hypothetical protein                   | 77.08 | 149  | MV_0632 | hypothetical protein                          | 97.93 | 145 | BCG_3591  | hypothetical protein                   | 77.08 | 149  | MAP0538  | hypothetical protein                | 174   | 100 |
| MAP4_3330 | hypothetical protein                                      | 86.65 | Rv3529c | hypothetical protein                                           | 86.65 | 384  | Mb3559c | hypothetical protein                   | 86.65 | 384  | MV_0631 | hypothetical protein                          | 100   | 381 | BCG_3593c | hypothetical protein                   | 86.65 | 384  | MAP0537  | hypothetical protein                | 381   | 100 |
| MAP4_3331 | oxidoreductase                                            | 82.31 | Rv3600  | Possible oxidoreductase                                        | 82.31 | 260  | Mb3560c | short chain dehydrogenase              | 82.31 | 260  | MV_0630 | short chain dehydrogenase                     | 99.22 | 257 | BCG_3594c | short chain dehydrogenase              | 82.31 | 260  | MAP0536  | short chain dehydrogenase           | 260   | 100 |
| MAP4_3332 | hypothetical protein                                      | 87.73 | Rv3531c | hypothetical protein                                           | 87.73 | 375  | Mb3561c | hypothetical protein                   | 87.73 | 375  | MV_0629 | hypothetical protein                          | 100   | 373 | BCG_3595  | hypothetical protein                   | 87.73 | 375  | MAP0535  | hypothetical protein                | 375   | 100 |
| MAP4_3333 | hypothetical protein                                      | 29.67 | Rv0203  | Possible exported protein                                      | 29.67 | 136  | Mb0209  | hypothetical protein                   | 29.67 | 136  | MV_0628 | hypothetical protein                          | 99.01 | 101 | BCG_3600  | hypothetical protein                   | 29.67 | 136  | MAP0534  | hypothetical protein                | 101   | 100 |
| MAP4_3334 | 4-hydroxy-2-oxovalerate aldolase                          | 92.65 | Rv3534c | Probable 4-hydroxy-2-oxovalerate aldolase                      | 92.65 | 346  | Mb3564c | 4-hydroxy-2-ketovalerate aldolase      | 92.65 | 346  | MV_0627 | 4-hydroxy-2-ketovalerate aldolase             | 99.15 | 352 | BCG_3598c | 4-hydroxy-2-ketovalerate aldolase      | 92.65 | 346  | MAP0533  | 4-hydroxy-2-ketovalerate aldolase   | 352   | 100 |
| MAP4_3335 | acetaldehyde dehydrogenase                                | 92.13 | Rv3535c | Probable acetaldehyde dehydrogenase                            | 92.13 | 303  | Mb3565c | acetaldehyde dehydrogenase             | 92.13 | 303  | MV_0626 | acetaldehyde dehydrogenase                    | 97.35 | 304 | BCG_3599c | acetaldehyde dehydrogenase             | 92.13 | 303  | MAP0532  | acetaldehyde dehydrogenase          | 303   | 100 |
| MAP4_3336 | hydrolase                                                 | 81.99 | Rv3336c | Probable hydrolase                                             | 81.99 | 261  | Mb3566c | hydrolase                              | 81.99 | 261  | MV_0625 | 2-keto-4-pentenoate hydratase                 | 99.62 | 261 | BCG_3600c | hydrolase                              | 81.99 | 261  | MAP0531  | hypothetical protein                | 261   | 100 |
| MAP4_3337 | 3-ketosteroid delta-1-dehydrogenase                       | 89.09 | Rv3537  | Probable dehydrogenase                                         | 89.09 | 563  | Mb3567  | 3-ketosteroid-delta-1-dehydrogenase    | 89.09 | 563  | MV_0624 | 3-ketosteroid-delta-1-dehydrogenase           | 99.46 | 560 | BCG_3601c | 3-ketosteroid-delta-1-dehydrogenase    | 89.09 | 563  | MAP0529  | 3-ketosteroid-delta-1-dehydrogenase | 563   | 100 |
| MAP4_3338 | dehydrogenase                                             | 296   | Rv3538  | Probable dehydrogenase Possible 2                              | 85.31 | 286  | Mb3568  | dehydrogenase                          | 85.31 | 286  | MV_0623 | MACC like domain-containing protein           | 98.95 | 286 | BCG_3602c | dehydrogenase                          | 296   | 286  | MAP0528  | dehydrogenase                       | 286   | 100 |
| MAP4_3339 | hypothetical protein                                      | 57.35 | Rv1482c | hypothetical protein                                           | 57.35 | 280  | Mb1518c | hypothetical protein                   | 57.35 | 280  | MV_0622 | hypothetical protein                          | 96.68 | 222 | BCG_3604c | hypothetical protein                   | 57.35 | 280  | MAP0528  | hypothetical protein                | 279   | 100 |
| MAP4_3340 | lipid transfer protein or keto acyl-CoA thiolase Ltp3     | 89.23 | Rv3540c | Probable lipid transfer protein or keto acyl-CoA thiolase Ltp3 | 89.23 | 386  | Mb3570c | lipid-transfer protein                 | 89.23 | 386  | MV_0621 | lipid-transfer protein                        | 99.49 | 389 | BCG_3604c | lipid-transfer protein                 | 89.23 | 386  | MAP0527  | lipid-transfer protein              | 386   | 100 |
| MAP4_3341 | hypothetical protein                                      | 88.1  | Rv3541c | hypothetical protein                                           | 88.1  | 129  | Mb3571c | hypothetical protein                   | 88.1  | 129  | MV_0620 | hypothetical protein                          | 100   | 133 | BCG_3605c | hypothetical protein                   | 88.1  | 129  | MAP0526  | hypothetical protein                | 133   | 100 |
| MAP4_3342 | hypothetical protein                                      | 83.33 | Rv3542c | hypothetical protein                                           | 83.33 | 311  | Mb3572c | hypothetical protein                   | 83.33 | 311  | MV_0619 | hypothetical protein                          | 100   | 317 | BCG_3606c | hypothetical protein                   | 83.33 | 311  | MAP0525  | hypothetical protein                | 317   | 100 |
| MAP4_3343 | acyl-CoA dehydrogenase FadE29                             | 387   | Rv3543c | Probable acyl-CoA dehydrogenase F                              | 87.53 | 387  | Mb3573c | acyl-CoA dehydrogenase                 | 87.53 | 387  | MV_0618 | acyl-CoA dehydrogenase                        | 100   | 387 | BCG_3607c | acyl-CoA dehydrogenase FadE29          | 87.53 | 387  | MAP0524  | acyl-CoA dehydrogenase              | 387   | 100 |
| MAP4_3344 | putative acyl-CoA dehydrogenase FadE28                    | 362   | Rv3544c | Probable acyl-CoA dehydrogenase F                              | 82.53 | 339  | Mb3574c | acyl-CoA dehydrogenase                 | 82.53 | 339  | MV_0617 | acyl-CoA dehydrogenase                        | 99.72 | 362 | BCG_3608c | acyl-CoA dehydrogenase FadE28          | 82.53 | 339  | MAP0523  | FadE28                              | 362   | 100 |
| MAP4_3345 | putative cytochrome P450 125 Cyp125                       | 82.49 | Rv3545c | Probable cytochrome P450 125 Cyp125                            | 82.49 | 433  | Mb3575c | cytochrome P450 125                    | 82.49 | 433  | MV_0616 | cytochrome P450 125                           | 99.76 | 416 | BCG_3609c | cytochrome P450 125 cyp125             | 82.49 | 433  | MAP0522  | hypothetical protein                | 416   | 100 |
| MAP4_3346 | acyl-CoA acetyltransferase FadA5                          | 416   | Rv3546c | Probable acyl-CoA acetyltransferase FadA5                      | 85.93 | 391  | Mb3576c | acyl-CoA acetyltransferase             | 85.93 | 391  | MV_0615 | acyl-CoA acetyltransferase                    | 99.74 | 386 | BCG_3610  | acyl-CoA acetyltransferase             | 85.93 | 391  | MAP0521c | acyl-CoA acetyltransferase          | 386   | 100 |
| MAP4_3347 | hypothetical protein                                      | 24.62 | Rv3512  | Probable riboflavin synthase alpha-2                           | 24.62 | 201  | Mb3577  | hypothetical protein                   | 24.62 | 201  | MV_0614 | hypothetical protein                          | 99.27 | 246 | BCG_3611c | hypothetical protein                   | 24.62 | 201  | MAP0520  | hypothetical protein                | 201   | 100 |
| MAP4_3348 | hypothetical protein                                      | 72.6  | Rv3547  | betaalanine-dependent nitroreductase                           | 72.6  | 151  | Mb3577  | betaalanine synthase subunit alpha     | 72.6  | 151  | MV_0613 | hypothetical protein                          | 99.3  | 142 | BCG_3612c | hypothetical protein                   | 72.6  | 151  | MAP0519c | hypothetical protein                | 133   | 100 |
| MAP4_3349 | short-chain type dehydrogenase/oxidoreductase             | 88.49 | Rv3548c | Probable short-chain type dehydrogenase/oxidoreductase         | 88.49 | 304  | Mb3578c | short chain dehydrogenase              | 88.49 | 304  | MV_0612 | short chain dehydrogenase                     | 98.67 | 301 | BCG_3613c | short chain dehydrogenase              | 88.49 | 304  | MAP0518  | short chain dehydrogenase           | 301   | 100 |
| MAP4_3350 | short-chain type dehydrogenase/oxidoreductase             | 75.19 | Rv3549c | Probable short-chain type dehydrogenase/oxidoreductase         | 75.19 | 259  | Mb3579c | short chain dehydrogenase              | 75.19 | 259  | MV_0611 | short chain dehydrogenase                     | 99.59 | 244 | BCG_3613c | short chain dehydrogenase              | 75.19 | 259  | MAP0517  | short chain dehydrogenase           | 259   | 100 |
| MAP4_3351 | enoyl-CoA hydratase Echa20                                | 265   | Rv3550  | Probable enoyl-CoA hydratase Echa                              | 91.36 | 247  | Mb3580  | enoyl-CoA hydratase                    | 91.36 | 247  | MV_0610 | enoyl-CoA hydratase                           | 98.41 | 251 | BCG_3614  | enoyl-CoA hydratase                    | 91.36 | 247  | MAP0516  | enoyl-CoA hydratase                 | 247   | 100 |
| MAP4_3352 | putative CoA-transferase alpha subunit                    | 239   | Rv3551  | Possible CoA-transferase alpha subunit                         | 87.85 | 292  | Mb3581  | CoA-transferase subunit alpha          | 87.85 | 292  | MV_0609 | CoA-transferase subunit alpha                 | 99.66 | 293 | BCG_3615  | CoA-transferase subunit alpha          | 87.85 | 292  | MAP0515  | hypothetical protein                | 292   | 100 |
| MAP4_3353 | putative CoA-transferase beta subunit                     | 239   | Rv3552  | Possible CoA-transferase beta subunit                          | 85.89 | 292  | Mb3582  | CoA-transferase subunit beta           | 85.89 | 292  | MV_0608 | CoA-transferase subunit beta                  | 99.19 | 247 | BCG_3616  | CoA-transferase subunit beta           | 85.89 | 292  | MAP0514  | hypothetical protein                | 247   | 100 |
| MAP4_3354 | oxidoreductase, 2-nitropentanoate dioxygenase             | 88.45 | Rv3553  | Possible oxidoreductase                                        | 88.45 | 355  | Mb3583  | oxidoreductase                         | 88.45 | 355  | MV_0607 | oxidoreductase, 2-nitropentanoate dioxygenase | 99.48 | 358 | BCG_3617  | oxidoreductase                         | 88.45 | 355  | MAP0513  | hypothetical protein                | 358   | 100 |
| MAP4_3355 | hypothetical protein                                      | 215   | Rv3530c | Possible oxidoreductase                                        | 36.84 | 260  | Mb3584c | short chain dehydrogenase              | 36.84 | 260  | MV_0606 | hypothetical protein                          | 98.02 | 202 | BCG_3594c | short chain dehydrogenase              | 36.84 | 260  | MAP0512c | hypothetical protein                | 215   | 100 |
| MAP4_3356 | hypothetical protein                                      | 33.33 | Rv0906  | hypothetical protein                                           | 33.33 | 372  | Mb0930  | hypothetical protein                   | 33.33 | 372  | MV_0605 | hypothetical protein                          |       |     |           |                                        |       |      |          |                                     |       |     |

Table S1 continued

|           |                                                                                  |       |         |                                                             |       |     |         |                                                             |       |     |         |                                                             |       |     |           |                                                             |       |     |          |                                                    |     |       |
|-----------|----------------------------------------------------------------------------------|-------|---------|-------------------------------------------------------------|-------|-----|---------|-------------------------------------------------------------|-------|-----|---------|-------------------------------------------------------------|-------|-----|-----------|-------------------------------------------------------------|-------|-----|----------|----------------------------------------------------|-----|-------|
| MAP4_3400 | type III pantothenate kinase family protein                                      | 271   | Rv3600c | hypothetical protein                                        | 91.18 | 272 | Mb3630c | pantothenate kinase                                         | 91.18 | 272 | Mb3630c | pantothenate kinase                                         | 100   | 273 | BCG_3664c | pantothenate kinase                                         | 91.18 | 272 | MAP0458  | aspartate alpha-decarboxylase                      | 171 | 100   |
| MAP4_3410 | aspartate L-decarboxylase precursor panD                                         | 143   | Rv3601i | Probable aspartate L-decarboxylase                          | 87.86 | 139 | Mb3631c | aspartate alpha-decarboxylase                               | 87.86 | 139 | Mb3631c | aspartate alpha-decarboxylase                               | 100   | 143 | BCG_3665c | aspartate alpha-decarboxylase                               | 87.86 | 139 | MAP0457  | aspartate alpha-decarboxylase                      | 243 | 100   |
| MAP4_3411 | beta-amine ligase PanC                                                           | 417   | Rv3602c | Probable beta-amine ligase PanC                             | 81.7  | 209 | Mb3632c | beta-amine ligase                                           | 81.7  | 209 | Mb3632c | beta-amine ligase                                           | 99.68 | 417 | BCG_3666c | beta-amine ligase                                           | 81.7  | 209 | MAP0456  | aspartate-beta-amine ligase                        | 303 | 100   |
| MAP4_3412 | conserved alanine and leucine rich protein                                       | 303   | Rv3603c | Conserved hypothetical alanine and                          | 88.37 | 303 | Mb3633c | hypothetical protein                                        | 88.37 | 303 | Mb3633c | hypothetical protein                                        | 99.05 | 303 | BCG_3667c | hypothetical protein                                        | 88.37 | 303 | MAP0455  | hypothetical protein                               | 303 | 100   |
| MAP4_3413 | conserved alanine, arginine and proline rich membrane conserved secreted protein | 462   | Rv3604c | Probable conserved transmembrane conserved secreted protein | 87.34 | 158 | Mb3635c | hypothetical protein                                        | 87.34 | 158 | Mb3635c | hypothetical protein                                        | 98.93 | 462 | BCG_3668c | transmembrane protein rich                                  | 87.34 | 158 | MAP0454  | hypothetical protein                               | 462 | 100   |
| MAP4_3414 | 2-amino-4-hydroxy-6-hydroxymethylidihydropteridine                               | 158   | Rv3606c | 2-amino-4-hydroxy-6-hydroxymethylidihydropteridine          | 74.4  | 188 | Mb3636c | 2-amino-4-hydroxy-6-hydroxymethylidihydropteridine aldolase | 74.4  | 188 | Mb3636c | 2-amino-4-hydroxy-6-hydroxymethylidihydropteridine aldolase | 98.93 | 158 | BCG_3670c | 2-amino-4-hydroxy-6-hydroxymethylidihydropteridine aldolase | 74.4  | 188 | MAP0452  | hypothetical protein                               | 158 | 100   |
| MAP4_3416 | dihydroxyacetone aldolase FdhB                                                   | 133   | Rv3607c | Probable dihydroxyacetone aldolase FdhB                     | 79.7  | 133 | Mb3637c | dihydroxyacetone aldolase FdhB                              | 79.7  | 133 | Mb3637c | dihydroxyacetone aldolase FdhB                              | 99.24 | 133 | BCG_3671c | dihydroxyacetone aldolase FdhB                              | 79.7  | 133 | MAP0451  | FDK                                                | 133 | 100   |
| MAP4_3417 | Dihydroxyacetone synthase EcpI                                                   | 270   | Rv3608c | Dihydroxyacetone synthase EcpI                              | 81.27 | 280 | Mb3638c | dihydroxyacetone synthase                                   | 81.27 | 280 | Mb3638c | dihydroxyacetone synthase                                   | 99.24 | 270 | BCG_3672c | dihydroxyacetone synthase                                   | 81.27 | 280 | MAP0450  | hypothetical protein                               | 270 | 100   |
| MAP4_3418 | GTP cyclohydrolase I FofI (GTP-ch-I)                                             | 204   | Rv3609c | GTP cyclohydrolase I FofI (GTP-ch-I)                        | 89.23 | 202 | Mb3639c | GTP cyclohydrolase I                                        | 89.23 | 202 | Mb3639c | GTP cyclohydrolase I                                        | 99.51 | 204 | BCG_3673c | GTP cyclohydrolase I                                        | 89.23 | 202 | MAP0449  | GTP cyclohydrolase I                               | 204 | 100   |
| MAP4_3419 | Membrane-bound cell division protein FtsH                                        | 799   | Rv3610c | Membrane-bound protease FtsH (ec)                           | 85.41 | 760 | Mb3640c | membrane-bound protease FtsH (ec)                           | 85.41 | 760 | Mb3640c | membrane-bound protease FtsH (ec)                           | 99.87 | 799 | BCG_3674c | membrane-bound protease FtsH (ec)                           | 85.41 | 760 | MAP0448  | hypothetical protein                               | 799 | 100   |
| MAP4_3420 | putative dioxygenase                                                             | 137   | Rv3627a | Hypothetical protein                                        | 24.83 | 193 | Mb36280 | hypothetical protein                                        | 24.83 | 193 | Mb36280 | dioxygenase                                                 | 100   | 137 | BCG_0312  | hypothetical protein                                        | 24.83 | 193 | MAP0447  | hypothetical protein                               | 137 | 100   |
| MAP4_3421 | epoxide hydrolase EphaA                                                          | 327   | Rv3617  | Probable epoxide hydrolase EphaA (ec)                       | 81.5  | 322 | Mb36173 | epoxide hydrolase                                           | 81.5  | 322 | Mb36173 | epoxide hydrolase                                           | 98.38 | 309 | BCG_1977  | epoxide hydrolase ephB                                      | 81.5  | 322 | MAP0446  | epHA                                               | 327 | 100   |
| MAP4_3422 | possible monooxygenase                                                           | 395   | Rv3618  | Possible monooxygenase                                      | 87.02 | 395 | Mb36179 | hypothetical protein                                        | 87.02 | 395 | Mb36179 | monooxygenase                                               | 100   | 395 | BCG_1978  | epoxide hydrolase                                           | 87.02 | 395 | MAP0445  | hypothetical protein                               | 395 | 100   |
| MAP4_3423 | hydrogenase                                                                      | 337   | Rv36173 | Possible hydrogenase                                        | 42.36 | 397 | Mb36173 | hydrogenase                                                 | 42.36 | 397 | Mb36173 | hydrogenase                                                 | 99.37 | 337 | BCG_3786  | hydrogenase                                                 | 42.36 | 397 | MAP0444  | hypothetical protein                               | 337 | 100   |
| MAP4_3424 | 13E12 repeat family protein                                                      | 526   | Rv3613c | Conserved 13E12 repeat family protein                       | 38.15 | 503 | Mb36143 | hypothetical protein                                        | 38.15 | 503 | Mb36143 | hypothetical protein                                        | 97.91 | 526 | BCG_0375  | hypothetical protein                                        | 38.15 | 503 | MAP0443  | hypothetical protein                               | 526 | 100   |
| MAP4_3425 | PPE family protein                                                               | 424   | Rv3621c | PPE family protein PPE65                                    | 53.3  | 413 | Mb3621c | PPE family protein                                          | 53.3  | 413 | Mb3621c | PPE family protein                                          | 97.36 | 424 | BCG_3158  | PPE family protein                                          | 53.3  | 413 | MAP0442  | hypothetical protein                               | 424 | 100   |
| MAP4_3426 | PF family protein                                                                | 99    | Rv3622c | PF family protein PFC2                                      | 52.87 | 99  | Mb36204 | PF family protein                                           | 52.87 | 99  | Mb36204 | PF family protein                                           | 96.97 | 99  | BCG_3540  | PF family protein                                           | 52.87 | 99  | MAP0441  | hypothetical protein                               | 99  | 100   |
| MAP4_3427 | lipoprotein LspG                                                                 | 248   | Rv3623  | Probable conserved lipoprotein LspG                         | 73.76 | 240 | Mb36247 | lipoprotein LspG                                            | 73.76 | 240 | Mb36247 | lipoprotein LspG                                            | 99.6  | 248 | BCG_3681  | lipoprotein lps                                             | 73.76 | 240 | MAP0440  | hypothetical protein                               | 248 | 100   |
| MAP4_3428 | hypoxanthine-guanine phosphoribosyltransferase Hpt                               | 203   | Rv3624c | hypoxanthine-guanine phosphoribosyltransferase Hpt          | 88    | 216 | Mb3648c | hypoxanthine-guanine phosphoribosyltransferase Hpt          | 88    | 216 | Mb3648c | hypoxanthine-guanine phosphoribosyltransferase Hpt          | 99.51 | 203 | BCG_3682  | hypoxanthine-guanine phosphoribosyltransferase Hpt          | 88    | 216 | MAP0439  | hypoxanthine-guanine phosphoribosyltransferase Hpt | 203 | 100   |
| MAP4_3429 | cell cycle protein MesJ                                                          | 320   | Rv3625c | cell cycle protein MesJ                                     | 74.61 | 323 | Mb3649c | cell cycle protein MesJ                                     | 74.61 | 323 | Mb3649c | cell cycle protein MesJ                                     | 97.5  | 320 | BCG_3683c | cell cycle protein mesJ                                     | 74.61 | 323 | MAP0438  | hypothetical protein                               | 320 | 100   |
| MAP4_3430 | hypothetical protein                                                             | 357   | Rv3626c | hypothetical protein                                        | 77.31 | 350 | Mb3626c | hypothetical protein                                        | 77.31 | 350 | Mb3626c | hypothetical protein                                        | 99.44 | 357 | BCG_3684c | hypothetical protein                                        | 77.31 | 350 | MAP0437  | hypothetical protein                               | 357 | 100   |
| MAP4_3431 | D-alanyl-D-alanine carboxypeptidase                                              | 461   | Rv3627c | inorganic pyrophosphatase                                   | 80.26 | 461 | Mb3635c | hypothetical protein                                        | 79.18 | 461 | Mb3635c | D-alanyl-D-alanine carboxypeptidase                         | 99.78 | 461 | BCG_3685c | hypothetical protein                                        | 79.18 | 461 | MAP0436  | hypothetical protein                               | 461 | 100   |
| MAP4_3432 | inorganic pyrophosphatase                                                        | 162   | Rv3628  | inorganic pyrophosphatase Ppa (pp)                          | 87.04 | 162 | Mb3635c | inorganic pyrophosphatase                                   | 87.04 | 162 | Mb3635c | inorganic pyrophosphatase                                   | 98.77 | 162 | BCG_3686c | inorganic pyrophosphatase pp                                | 87.04 | 162 | MAP0435c | inorganic pyrophosphatase                          | 162 | 100   |
| MAP4_3433 | hypothetical protein                                                             | 359   | Rv3629c | Probable conserved integral membr                           | 75.43 | 365 | Mb3653c | hypothetical protein                                        | 75.43 | 365 | Mb3653c | hypothetical protein                                        | 99.16 | 362 | BCG_3687c | hypothetical protein                                        | 75.43 | 365 | MAP0434  | hypothetical protein                               | 359 | 100   |
| MAP4_3434 | hypothetical protein                                                             | 438   | Rv3630  | Probable conserved integral membr                           | 80.43 | 431 | Mb3654  | hypothetical protein                                        | 80.67 | 431 | Mb3654  | hypothetical protein                                        | 99.28 | 416 | BCG_3688c | integral membrane protein                                   | 80.67 | 431 | MAP0433c | hypothetical protein                               | 438 | 100   |
| MAP4_3435 | putative glycosyl transferase                                                    | 233   | Rv3631  | Possible transferase (possibly glyco)                       | 84.39 | 241 | Mb3655  | transferase                                                 | 84.39 | 241 | Mb3655  | glycosyl transferase                                        | 99.55 | 233 | BCG_3689c | transferase                                                 | 84.39 | 241 | MAP0432c | hypothetical protein                               | 233 | 100   |
| MAP4_3436 | hypothetical protein                                                             | 113   | Rv3632  | Probable conserved membrane prot                            | 87.5  | 114 | Mb3656  | hypothetical protein                                        | 87.5  | 114 | Mb3656  | hypothetical protein                                        | 99.28 | 113 | BCG_3690c | hypothetical protein                                        | 87.5  | 114 | MAP0431  | hypothetical protein                               | 113 | 100   |
| MAP4_3437 | UDP-glucose 4-epimerase GalE1                                                    | 518   | Rv3634c | UDP-glucose 4-epimerase GalE1 (ep)                          | 88.32 | 514 | Mb3656c | UDP-glucose 4-epimerase                                     | 88.32 | 514 | Mb3656c | UDP-glucose 4-epimerase                                     | 99.04 | 513 | BCG_3690c | UDP-glucose 4-epimerase                                     | 88.32 | 514 | MAP0430  | hypothetical protein                               | 518 | 100   |
| MAP4_3438 | hypothetical protein                                                             | 594   | Rv3635  | Probable conserved transmembrane                            | 79.11 | 591 | Mb3659c | transmembrane protein                                       | 79.11 | 591 | Mb3659c | hypothetical protein                                        | 99.41 | 580 | BCG_3693  | hypothetical protein                                        | 79.11 | 591 | MAP0429  | hypothetical protein                               | 594 | 100   |
| MAP4_3441 | DNA polymerase                                                                   | 401   | Rv3644c | Possible DNA polymerase                                     | 87.75 | 401 | Mb3662c | DNA polymerase III subunit delta'                           | 87.75 | 401 | Mb3662c | DNA polymerase III subunit delta'                           | 99.23 | 388 | BCG_3702c | DNA polymerase III subunit delta'                           | 87.75 | 401 | MAP0427  | DNA polymerase III subunit delta'                  | 401 | 100   |
| MAP4_3442 | hypothetical protein                                                             | 553   | Rv3645  | Probable conserved transmembrane                            | 84.43 | 549 | Mb3669  | transmembrane protein                                       | 84.43 | 549 | Mb3669  | transmembrane protein                                       | 99.81 | 534 | BCG_3703  | hypothetical protein                                        | 84.43 | 549 | MAP0426c | hypothetical protein                               | 553 | 100   |
| MAP4_3443 | DNA topoisomerase I TopA                                                         | 932   | Rv3646c | DNA topoisomerase I TopA (omega)                            | 82.06 | 932 | Mb3669c | DNA topoisomerase I                                         | 82.06 | 932 | Mb3669c | DNA topoisomerase I                                         | 98.98 | 932 | BCG_3704c | DNA topoisomerase I                                         | 82.06 | 932 | MAP0425c | DNA topoisomerase I                                | 932 | 100   |
| MAP4_3444 | hypothetical protein                                                             | 196   | Rv3647c | hypothetical protein                                        | 82.05 | 192 | Mb3671c | hypothetical protein                                        | 82.05 | 192 | Mb3671c | hypothetical protein                                        | 99.49 | 196 | BCG_3705c | hypothetical protein                                        | 82.05 | 192 | MAP0424  | hypothetical protein                               | 196 | 100   |
| MAP4_3445 | Cold shock protein CspA                                                          | 776   | Rv3648c | Probable cold shock protein A                               | 100   | 67  | Mb3672c | cold shock protein A                                        | 100   | 67  | Mb3672c | hypothetical protein                                        | 100   | 67  | BCG_3706c | cold shock protein A cspA                                   | 100   | 67  | MAP0423c | CspA                                               | 1   | 100   |
| MAP4_3446 | ATP-dependent helicase                                                           | 776   | Rv3649  | Probable helicase                                           | 84.59 | 771 | Mb3673  | helicase                                                    | 84.72 | 771 | Mb3673  | ATP-dependent rna helicase, dead                            | 98.97 | 776 | BCG_3707  | helicase                                                    | 84.59 | 771 | MAP0422c | hypothetical protein                               | 776 | 100   |
| MAP4_3447 | hypothetical protein                                                             | 345   | Rv3651  | hypothetical protein                                        | 76.74 | 345 | Mb3675  | hypothetical protein                                        | 76.74 | 345 | Mb3675  | hypothetical protein                                        | 99.39 | 327 | BCG_3709  | hypothetical protein                                        | 76.74 | 345 | MAP0421c | hypothetical protein                               | 345 | 99.71 |
| MAP4_3448 | hypothetical protein                                                             | 67    | Rv3654c | hypothetical protein                                        | 67.53 | 64  | Mb3676c | hypothetical protein                                        | 67.53 | 64  | Mb3676c | hypothetical protein                                        | 98.97 | 67  | BCG_3712c | hypothetical protein                                        | 67.53 | 64  | MAP0420  | hypothetical protein                               | 573 | 48.39 |
| MAP4_3449 | hypothetical protein                                                             | 89    | Rv3655c | hypothetical protein                                        | 68.77 | 89  | Mb3679c | hypothetical protein                                        | 68.77 | 89  | Mb3679c | hypothetical protein                                        | 98.51 | 89  | BCG_3714c | hypothetical protein                                        | 68.77 | 89  | MAP0419  | hypothetical protein                               | 89  | 100   |
| MAP4_3450 | hypothetical protein                                                             | 97    | Rv3656c | hypothetical protein                                        | 79.37 | 68  | Mb3680c | hypothetical protein                                        | 79.37 | 68  | Mb3680c | hypothetical protein                                        | 98.48 | 66  | BCG_3714c | hypothetical protein                                        | 79.37 | 68  | MAP0418  | hypothetical protein                               | 97  | 100   |
| MAP4_3451 | putative conserved alanine rich membrane protein                                 | 105   | Rv3657c | Possible conserved alanine rich membr                       | 69.47 | 191 | Mb3681c | hypothetical protein                                        | 69.47 | 191 | Mb3681c | hypothetical protein                                        | 99.49 | 105 | BCG_3715c | alanine rich membrane protein                               | 69.47 | 191 | MAP0417  | hypothetical protein                               | 105 | 99.48 |
| MAP4_3452 | conserved transmembrane protein                                                  | 267   | Rv3658c | Probable conserved transmembrane                            | 67.42 | 266 | Mb3682c | transmembrane protein                                       | 67.42 | 266 | Mb3682c | transmembrane protein                                       | 99.85 | 267 | BCG_3716c | hypothetical protein                                        | 67.42 | 266 | MAP0416  | hypothetical protein                               | 267 | 100   |
| MAP4_3453 | type III secretion system protein F                                              | 99    | Rv3659c | hypothetical protein                                        | 87.68 | 99  | Mb3683c | hypothetical protein                                        | 87.68 | 99  | Mb3683c | Type III secretion system protein F                         | 99.3  | 99  | BCG_3717c | hypothetical protein                                        | 87.68 | 99  | MAP0415  | hypothetical protein                               | 99  | 100   |
| MAP4_3454 | hypothetical protein                                                             | 385   | Rv3660c | hypothetical protein                                        | 74.36 | 350 | Mb3684c | hypothetical protein                                        | 74.36 | 350 | Mb3684c | Type III secretion system protein F                         | 98.01 | 386 | BCG_3718c | hypothetical protein                                        | 74.36 | 350 | MAP0414  | hypothetical protein                               | 385 | 100   |
| MAP4_3455 | haloacid dehalogenase (HAD)-like hydrolase family protein                        | 291   | Rv3661c | hypothetical protein                                        | 87.37 | 287 | Mb3685  | hypothetical protein                                        | 87.37 | 287 | Mb3685  | HAD-superfamily protein subfamily                           | 100   | 285 | BCG_3719  | hypothetical protein                                        | 87.37 | 287 | MAP0414c | hypothetical protein                               | 285 | 100   |
| MAP4_3456 | hypothetical protein                                                             | 252   | Rv3662c | hypothetical protein                                        | 79.92 | 256 | Mb3686c | hypothetical protein                                        | 79.92 | 256 | Mb3686c | hypothetical protein                                        | 100   | 243 | BCG_3720c | hypothetical protein                                        | 79.92 | 256 | MAP0413  | hypothetical protein                               | 252 | 100   |
| MAP4_3457 | dipeptide-transport ATP-binding protein ABC transporter                          | 78.64 | Rv3663c | Probable dipeptide-transport ATP-bi                         | 78.64 | 548 | Mb3687c | peptide ABC transporter ATP                                 | 78.64 | 548 | Mb3687c | ABC transporter ATP-binding protein                         | 99.27 | 551 | BCG_3721c | dipeptide-transport ATP-binding protein                     | 78.64 | 548 | MAP0412  | Dppg1                                              | 1   | 100   |
| MAP4_3458 | dipeptide-transport membrane protein ABC transporter                             | 291   | Rv3664c | Probable dipeptide-transport integr                         | 90.04 | 266 | Mb3688c | peptide ABC transporter                                     | 90.04 | 266 | Mb3688c | ABC transporter permease                                    | 99.31 | 291 | BCG_3722c | dipeptide-transport integrat                                | 90.04 | 266 | MAP0411  | hypothetical protein                               | 291 | 100   |
| MAP4_3459 | dipeptide-transport membrane protein ABC transporter                             | 308   | Rv3665c | Probable dipeptide-transport integr                         | 90.26 | 308 | Mb3688c | peptide ABC transporter                                     | 90.26 | 308 | Mb3688c | ABC transporter permease                                    | 99.03 | 3   |           |                                                             |       |     |          |                                                    |     |       |

Table S1 continued

|           |                                                          |       |         |                                        |       |     |          |                                 |       |     |         |                                     |       |     |           |                                   |       |     |          |                                   |       |       |
|-----------|----------------------------------------------------------|-------|---------|----------------------------------------|-------|-----|----------|---------------------------------|-------|-----|---------|-------------------------------------|-------|-----|-----------|-----------------------------------|-------|-----|----------|-----------------------------------|-------|-------|
| MAP4_3509 | putative conserved membrane protein                      | 217   | Rv3690  | Probable conserved membrane prot       | 68.2  | 217 | MV_0414  | hypothetical protein            | 68.2  | 217 | MV_0414 | hypothetical protein                | 98.62 | 217 | BCG_3749  | hypothetical protein              | 68.2  | 217 | MAP0361  | hypothetical protein              | 217   | 100   |
| MAP4_3510 | hypothetical protein                                     | 377   | Rv3691  | Probable conserved membrane prot       | 66.87 | 333 | MV03716  | hypothetical protein            | 66.87 | 333 | MV_0413 | hypothetical protein                | 99.2  | 377 | BCG_3750  | hypothetical protein              | 66.87 | 333 | MAP0366  | hypothetical protein              | 217   | 100   |
| MAP4_3511 | probable methanol dehydrogenase transcriptional regul    | 327   | Rv3692  | Probable methanol dehydrogenase        | 68.27 | 333 | MV03716  | methanol dehydrogenase tra      | 68.27 | 333 | MV_0413 | hypothetical protein                | 99.27 | 327 | BCG_3751  | methanol dehydrogenase tran       | 68.27 | 333 | MAP0366  | hypothetical protein              | 217   | 100   |
| MAP4_3512 | putative conserved membrane protein                      | 440   | Rv3693  | Possible conserved membrane prot       | 82.5  | 440 | MV03718  | hypothetical protein            | 82.5  | 440 | MV_0411 | ATPase                              | 99.09 | 440 | BCG_3752  | hypothetical protein              | 82.5  | 440 | MAP0358  | hypothetical protein              | 442   | 100   |
| MAP4_3513 | hypothetical protein                                     | 330   | Rv3694  | Possible conserved transmembrane       | 79.09 | 330 | MV03719c | transmembrane protein           | 79.09 | 330 | MV_0410 | integral membrane protein           | 99.7  | 330 | BCG_3753  | hypothetical protein              | 79.09 | 330 | MAP0357  | hypothetical protein              | 330   | 100   |
| MAP4_3514 | putative conserved membrane protein                      | 289   | Rv3695  | Possible conserved membrane prot       | 78.93 | 310 | MV03720  | hypothetical protein            | 78.93 | 310 | MV_0408 | integral membrane protein           | 99.31 | 290 | BCG_3754  | hypothetical protein              | 78.93 | 310 | MAP0356  | hypothetical protein              | 289   | 100   |
| MAP4_3515 | hypothetical protein                                     | 129   | Rv0961  | Possible integral membrane protein     | 45.45 | 115 | MV02986  | hypothetical protein            | 45.45 | 115 | MV_0409 | hypothetical protein                | 99.22 | 129 | BCG_1015  | integral membrane protein         | 45.45 | 115 | MAP0355  | hypothetical protein              | 129   | 100   |
| MAP4_3516 | hypothetical protein, PadR family                        | 238   | Rv0047c | Possible conserved membrane prot       | 35.62 | 180 | MV03694  | hypothetical protein            | 35.62 | 180 | MV_0407 | PuRr family transcriptional regulat | 98.58 | 238 | BCG_0078b | hypothetical protein              | 35.62 | 180 | MAP0348  | hypothetical protein              | 238   | 100   |
| MAP4_3517 | Glycerol kinase Glik                                     | 515   | Rv3696c | Probable glycerol kinase Glik (ATP)    | 87.4  | 517 | MV03722c | glycerol kinase                 | 85.79 | 251 | MV_0406 | D-isomer specific 2-hydroxyacid de  | 99.21 | 515 | BCG_3755c | glycerol kinase                   | 87.43 | 519 | MAP0353  | glycerol kinase                   | 515   | 100   |
| MAP4_3518 | D-3-phosphoglycerate dehydrogenase                       | 328   | Rv2996c | Probable D-3-phosphoglycerate dehyd    | 36.21 | 528 | MV03902c | D-3-phosphoglycerate dehyd      | 36.21 | 528 | MV_0409 | D-isomer specific 2-hydroxyacid de  | 98.85 | 329 | BCG_3017c | D-3-phosphoglycerate dehydrogen   | 36.21 | 528 | MAP0352  | hypothetical protein              | 328   | 100   |
| MAP4_3519 | Transcriptional regulator, TerF family                   | 198   | Rv3830c | Transcriptional regulatory protein     | 38.04 | 209 | MV03850c | transcriptional regulatory pro  | 38.04 | 209 | MV_0350 | TerF family transcriptional regulat | 100   | 198 | BCG_3893c | TerF family transcriptional regul | 38.04 | 209 | MAP0351  | hypothetical protein              | 198   | 100   |
| MAP4_3520 | putative dehydrogenase, acyl-CoA dehydrogenase           | 257   | Rv0769  | Probable dehydrogenase/reductase       | 35.92 | 248 | MV03792  | short chain dehydrogenase       | 35.92 | 248 | MV_0351 | short chain dehydrogenase/reduct    | 99.61 | 257 | BCG_0821  | short chain dehydrogenase         | 35.92 | 248 | MAP0350  | hypothetical protein              | 257   | 100   |
| MAP4_3521 | hypothetical protein                                     | 60191 | Rv3594  | Possible conserved membrane prot       | 60.91 | 354 | MV03888  | hypothetical protein            | 60.91 | 354 | MV_0354 | hypothetical protein                | 99.44 | 359 | BCG_1117  | hypothetical protein              | 60.91 | 354 | MAP0349  | hypothetical protein              | 357   | 100   |
| MAP4_3522 | putative oxidoreductase, short-chain type dehydrogen     | 297   | Rv3595c | Probable short-chain type dehydrog     | 38.58 | 259 | MV03795c | short chain dehydrogenase       | 38.58 | 259 | MV_0354 | oxidoreductase, short chain dehyd   | 97.89 | 285 | BCG_3613c | short chain dehydrogenase         | 38.58 | 259 | MAP0348c | hypothetical protein              | 297   | 100   |
| MAP4_3523 | putative acyltransferase, wax ester synthase-like Acyl-C | 451   | Rv3734c | Putative triacylglycerol synthase (Glc | 73.51 | 454 | MV03761c | hypothetical protein            | 73.51 | 454 | MV_0355 | bifunctional wax ester synthase/fac | 97.78 | 451 | BCG_3794c | hypothetical protein              | 73.51 | 454 | MAP0347c | hypothetical protein              | 451   | 100   |
| MAP4_3524 | hypothetical protein                                     | 161   | Rv3733c | hypothetical protein                   | 79.38 | 166 | MV03760c | hypothetical protein            | 79.38 | 166 | MV_0356 | nucleic hydrolase                   | 98.76 | 161 | BCG_3793c | hypothetical protein              | 79.38 | 166 | MAP0346c | hypothetical protein              | 161   | 100   |
| MAP4_3525 | haloalkane dehalogenase                                  | 301   | Rv2296  | Probable haloalkane dehalogenase       | 51    | 300 | MV03218  | haloalkane dehalogenase         | 51    | 300 | MV_0357 | haloalkane dehalogenase             | 99.34 | 301 | BCG_2312  | haloalkane dehalogenase           | 51    | 300 | MAP0345c | haloalkane dehalogenase           | 301   | 100   |
| MAP4_3526 | putative cytochrome P450 hydroxylase                     | 411   | Rv1806c | Probable cytochrome P450 140 CYP2      | 38.26 | 438 | MV03126c | cytochrome p450 140 CYP240      | 38.26 | 438 | MV_0358 | cytochrome P450                     | 99.03 | 411 | BCG_1917c | cytochrome p450 140 CYP140        | 38.26 | 438 | MAP0344c | hypothetical protein              | 411   | 100   |
| MAP4_3527 | hypothetical protein                                     | 122   | Rv3042c | Probable phosphotransase phosphatase   | 37.44 | 409 | MV03865  | hypothetical protein            | 37.44 | 409 | MV_0359 | hypothetical protein                | 98.33 | 120 | BCG_3898  | hypothetical protein              | 37.44 | 409 | MAP0343c | hypothetical protein              | 122   | 100   |
| MAP4_3528 | hypothetical protein                                     | 115   | Rv3124c | Secreted protein antigen               | 32.35 | 103 | MV03441c | hypothetical protein            | 32.35 | 103 | MV_0361 | hypothetical protein                | 98.26 | 115 | BCG_3378c | hypothetical protein              | 32.35 | 103 | MAP0342c | hypothetical protein              | 115   | 100   |
| MAP4_3529 | ATP-dependent DNA ligase LigC                            | 369   | Rv3711  | Possible ATP-dependent DNA ligase      | 87.11 | 358 | MV03758  | ATP-dependent DNA ligase        | 87.39 | 358 | MV_0362 | ATP-dependent DNA ligase            | 99.45 | 364 | BCG_3791  | ATP-dependent DNA ligase          | 87.39 | 358 | MAP0341  | ATP-dependent DNA ligase          | 369   | 100   |
| MAP4_3530 | hypothetical protein                                     | 342   | Rv3730c | hypothetical protein                   | 87.1  | 346 | MV03757c | hypothetical protein            | 87.1  | 346 | MV_0360 | DNA polymerase LigD polymerase      | 99.71 | 342 | BCG_3790c | hypothetical protein              | 87.1  | 346 | MAP0340c | hypothetical protein              | 342   | 100   |
| MAP4_3531 | hypothetical protein                                     | 697   | Rv1220  | Probable exonuclease ABC subunit       | 32.76 | 646 | MV03555  | exonuclease ABC subunit C       | 32.76 | 646 | MV_0365 | hypothetical protein                | 98.96 | 670 | BCG_1481  | exonuclease ABC subunit C         | 32.76 | 646 | MAP0339c | hypothetical protein              | 697   | 100   |
| MAP4_3532 | transposase, IS4 family                                  | 557   | Rv3086  | Possible transposase                   | 25.98 | 234 | MV03418  | transposase                     | 25.98 | 234 | MV_3010 | ABC transporter ATP-binding prot    | 99.17 | 557 | BCG_3455  | transposase                       | 25.98 | 234 | MAP0338c | hypothetical protein              | 557   | 100   |
| MAP4_3533 | putative transmembrane protein                           | 331   | Rv1648  | Probable transmembrane protein         | 50.72 | 268 | MV01675  | transmembrane protein           | 50.72 | 268 | MV_0364 | hypothetical protein                | 98.17 | 351 | BCG_1687  | hypothetical protein              | 50.72 | 268 | MAP0337  | hypothetical protein              | 331   | 100   |
| MAP4_3534 | putative cytochrome P450                                 | 400   | Rv0766c | Probable cytochrome P450 123 Cyp13     | 38.63 | 402 | MV03867c | cytochrome P450 123 cyp123      | 38.63 | 402 | MV_0366 | cytochrome P450 superfamily prot    | 99.25 | 400 | BCG_0818c | cytochrome P450 123 cyp123        | 38.76 | 541 | MAP0336c | hypothetical protein              | 400   | 100   |
| MAP4_3535 | Transcriptional regulator, TerF family                   | 191   | Rv0328  | Possible transcriptional regulatory pr | 26.06 | 200 | MV03335  | TerF/Acr family transcription r | 26.06 | 200 | MV_0367 | TerF family transcriptional regulat | 98.43 | 191 | BCG_0367  | TerF family transcriptional regul | 26.06 | 200 | MAP0335  | hypothetical protein              | 191   | 100   |
| MAP4_3536 | oxidoreductase                                           | 303   | Rv3725  | Possible oxidoreductase                | 86.49 | 309 | MV03752  | oxidoreductase                  | 86.49 | 309 | MV_0368 | 4-hydroxyflavon-4-reductase         | 99.56 | 307 | BCG_3337  | oxidoreductase                    | 86.49 | 309 | MAP0334  | hypothetical protein              | 303   | 100   |
| MAP4_3537 | cutinase                                                 | 209   | Rv3724b | Probable cutinase [second part] Cut    | 70.24 | 187 | MV03751  | cutinase                        | 71.22 | 233 | MV_0369 | cutinase precursor cut5             | 99.53 | 211 | BCG_3333  | cutinase precursor cut5           | 71.22 | 233 | MAP0333  | hypothetical protein              | 209   | 100   |
| MAP4_3538 | hypothetical protein                                     | 355   | Rv3509  | hypothetical protein                   | 35.98 | 354 | MV03071  | hypothetical protein            | 35.98 | 354 | MV_0371 | dihydrodipicolinate reductase       | 99.44 | 355 | BCG_1117  | hypothetical protein              | 35.98 | 354 | MAP0332  | hypothetical protein              | 355   | 100   |
| MAP4_3539 | hypothetical protein                                     | 378   | Rv0662c | Methoxy mycolic acid synthase 4 M      | 40    | 301 | MV03372  | methoxy mycolic acid synthas    | 40    | 301 | MV_0372 | hypothetical protein                | 98.15 | 378 | BCG_0691c | methoxy mycolic acid synthase 4   | 40    | 301 | MAP0331  | hypothetical protein              | 378   | 100   |
| MAP4_3540 | hypothetical protein                                     | 442   | Rv0379c | Probable acyl-CoA dehydrogenase F      | 39.13 | 275 | MV03106c | hypothetical protein            | 39.13 | 275 | MV_0373 | hypothetical protein                | 97.51 | 444 | BCG_3104c | hypothetical protein              | 39.13 | 275 | MAP0330  | hypothetical protein              | 442   | 100   |
| MAP4_3541 | hypothetical protein                                     | 333   | Rv3127  | hypothetical protein                   | 33.33 | 257 | MV03107  | hypothetical protein            | 33.33 | 257 | MV_0374 | hypothetical protein                | 99.13 | 333 | BCG_3264  | hypothetical protein              | 33.33 | 257 | MAP0329  | hypothetical protein              | 333   | 100   |
| MAP4_3542 | hypothetical protein                                     | 462   | Rv3313  | Probable sugar transport integral m    | 31.96 | 502 | MV03364  | hypothetical protein            | 31.96 | 502 | MV_0375 | hypothetical protein                | 98.13 | 460 | BCG_3401  | hypothetical protein              | 31.96 | 502 | MAP0328  | hypothetical protein              | 462   | 100   |
| MAP4_3543 | hypothetical protein                                     | 561   | Rv2402  | hypothetical protein                   | 31.96 | 642 | MV02425  | hypothetical protein            | 31.96 | 642 | MV_0376 | hypothetical protein                | 98.4  | 562 | BCG_2488  | hypothetical protein              | 31.96 | 642 | MAP0327  | hypothetical protein              | 561   | 100   |
| MAP4_3544 | putative 19 kDa lipoprotein antigen precursor lipq1      | 405   | Rv3763  | 19 kDa lipoprotein antigen precursor   | 40.59 | 159 | MV03789  | hypothetical protein            | 40.59 | 159 | MV_0377 | hypothetical protein                | 99.34 | 152 | BCG_3822  | 19 kDa lipoprotein antigen pre    | 40.59 | 159 | MAP0326  | hypothetical protein              | 163   | 100   |
| MAP4_3545 | hypothetical protein                                     | 123   | Rv3543c | Probable acyl-CoA dehydrogenase F      | 34.48 | 387 | MV03573c | acyl-CoA dehydrogenase          | 34.48 | 387 | MV_0379 | hypothetical protein                | 100   | 125 | BCG_3607c | acyl-CoA dehydrogenase FadE2      | 34.48 | 387 | MAP0325  | hypothetical protein              | 123   | 100   |
| MAP4_3546 | putative conserved membrane protein                      | 277   | Rv3723  | Probable conserved transmembrane       | 65.98 | 294 | MV03743  | lipid transmembrane protein     | 65.98 | 294 | MV_0380 | hypothetical protein                | 97.83 | 277 | BCG_3792  | hypothetical protein              | 65.98 | 294 | MAP0324  | hypothetical protein              | 277   | 100   |
| MAP4_3547 | putative aminotransferase                                | 428   | Rv3722c | hypothetical protein                   | 65.98 | 435 | MV03748c | hypothetical protein            | 65.98 | 435 | MV_0381 | partially transaminase              | 98.42 | 428 | BCG_3458  | hypothetical protein              | 65.98 | 435 | MAP0323c | hypothetical protein              | 428   | 100   |
| MAP4_3548 | DNA polymerase III subunits gamma tau subunit            | 612   | Rv3721c | DNA polymerase III (subunit gamma)     | 79.42 | 578 | MV03849c | DNA polymerase III subunits     | 79.42 | 578 | MV_0382 | DNA polymerase III subunits gamm    | 97.55 | 608 | BCG_3781c | DNA polymerase III subunits g     | 79.42 | 578 | MAP0322c | DNA polymerase III subunits gamma | 612   | 100   |
| MAP4_3549 | fatty acid synthase                                      | 436   | Rv3720  | Fassible fatty acid synthase           | 86.67 | 420 | MV03747  | fatty acid synthase             | 86.67 | 420 | MV_0383 | cytochrome-fatty-acyl-phospholip    | 100   | 436 | BCG_3780  | fatty acid synthase               | 86.67 | 420 | MAP0321  | hypothetical protein              | 436   | 100   |
| MAP4_3550 | hypothetical protein                                     | 474   | Rv3719  | hypothetical protein                   | 79.75 | 470 | MV03746  | hypothetical protein            | 79.75 | 470 | MV_0384 | FAD/FMN-containing dehydrogena      | 99.16 | 474 | BCG_3779  | hypothetical protein              | 79.75 | 470 | MAP0320  | hypothetical protein              | 474   | 100   |
| MAP4_3551 | hypothetical protein                                     | 145   | Rv3718c | hypothetical protein                   | 86.84 | 147 | MV03745c | hypothetical protein            | 86.84 | 147 | MV_0385 | hypothetical protein                | 99.31 | 145 | BCG_3778c | hypothetical protein              | 86.84 | 147 | MAP0319c | hypothetical protein              | 145   | 100   |
| MAP4_3552 | putative N-acetylmuramoyl-L-alanine amidase              | 116   | Rv3717  | hypothetical protein                   | 81.89 | 241 | MV03874  | hypothetical protein            | 81.89 | 241 | MV_0385 | N-acetylmuramoyl-L-alanine amid     | 99.78 | 116 | BCG_3777  | hypothetical protein              | 81.89 | 241 | MAP0318  | hypothetical protein              | 116   | 100   |
| MAP4_3553 | hypothetical protein                                     | 86.17 | Rv3716c | hypothetical protein                   | 86.17 | 133 | MV03873  | hypothetical protein            | 86.17 | 133 | MV_0387 | hypothetical protein                | 100   | 108 | BCG_3765c | hypothetical protein              | 86.17 | 133 | MAP0317c | hypothetical protein              | 86.17 | 100   |
| MAP4_3554 | recombination protein RecR                               | 203   | Rv3715c | Probable recombination protein RecR    | 84.55 | 203 | MV03872c | recombination protein RecR      | 84.55 | 203 | MV_0388 | recombination protein RecR          | 100   | 203 | BCG_3775c | recombination protein RecR        | 84.55 | 203 | MAP0316c | recombination protein RecR        | 203   | 100   |
| MAP4_3555 | putative cobyrinic acid synthase CobQ2                   | 235   | Rv0313  | Possible cobyrinic acid synthase CobQ  | 87.01 | 231 | MV03889  | cobyrinic acid synthase CobQ2   | 87.01 | 231 | MV_0389 | CobB/CobI-like glutamine amidot     | 98.72 | 235 | BCG_3773  | cobyrinic acid synthase cobQ2     | 87.01 | 231 | MAP0315  | CobQ2                             | 235   | 99.56 |
| MAP4_3556 | hypothetical protein                                     | 405   | Rv3712  | Possible lipase                        | 86.19 | 413 | MV03892  | lipase                          | 86.19 | 413 | MV_0390 | lipase                              | 99.52 | 416 | BCG_3772  | hypothetical protein              |       |     |          |                                   |       |       |

## Table S1 continued

|           |                                                            |      |          |                                                  |       |      |          |                                         |       |      |         |                                       |       |      |            |                                         |       |      |          |                                       |      |       |
|-----------|------------------------------------------------------------|------|----------|--------------------------------------------------|-------|------|----------|-----------------------------------------|-------|------|---------|---------------------------------------|-------|------|------------|-----------------------------------------|-------|------|----------|---------------------------------------|------|-------|
| MAP4_3610 | 19 kDa lipoprotein antigen precursor LpqH                  | 461  | Rv3763   | 19 kDa lipoprotein antigen precursor             | 76.73 | 159  | MB3789   | hypothetical protein                    | 76.73 | 159  | MV_0306 | lipoprotein LpqH                      | 100   | 161  | BCG_3822   | 19 kDa lipoprotein antigen prec         | 76.73 | 159  | MAP0261c | hypothetical protein                  | 461  | 100   |
| MAP4_3611 | two component system sensor kinase                         | 496  | Rv3764c  | Possible two component sensor kinase             | 81.82 | 475  | MB3790c  | two component sensor kinase             | 81.82 | 475  | MV_0305 | sensor histidine kinase               | 99.6  | 496  | BCG_3823c  | two component sensor kinase             | 81.82 | 475  | MAP0260  | hypothetical protein                  | 496  | 100   |
| MAP4_3612 | two component system transcriptional regulator             | 246  | Rv3765   | Possible two component transcriptional regulator | 84.02 | 234  | MB3791   | two component transcriptional regulator | 84.02 | 234  | MV_0304 | two component response regulator      | 84.02 | 246  | BCG_3824c  | two component transcriptional regulator | 84.02 | 234  | MAP0259  | hypothetical protein                  | 246  | 100   |
| MAP4_3613 | hypothetical protein                                       | 29   | Rv3766   | Possible lipoprotein LpqH                        | 44.44 | 186  | MB3792   | hypothetical protein                    | 38.46 | 470  | MV_0303 | hypothetical protein                  | 100   | 51   | BCG_1642   | hypothetical protein                    | 38.46 | 470  | MAP0258  | hypothetical protein                  | 29   | 100   |
| MAP4_3614 | hypothetical protein                                       | 39   | Rv3767c  | Possible malate:quinone oxidoreductase           | 33.33 | 493  | MB2877c  | malate:quinone oxidoreductase           | 33.33 | 493  | MV_0302 | hypothetical protein                  | 100   | 75   | BCG_2877c  | malate:quinone oxidoreductase           | 33.33 | 493  | MAP0257  | hypothetical protein                  | 79   | 100   |
| MAP4_3615 | putative methyltransferase                                 | 314  | Rv3767c  | Possible S-adenosylmethionine-dep                | 78.14 | 314  | MB3793c  | hypothetical protein                    | 78.14 | 314  | MV_0301 | hypothyltransferase, putative, family | 99.04 | 314  | BCG_3826c  | hypothetical protein                    | 78.14 | 314  | MAP0256  | hypothetical protein                  | 314  | 100   |
| MAP4_3616 | putative acyl-CoA dehydrogenase                            | 339  | Rv3767c  | Possible acyl-CoA dehydrogenase                  | 33.33 | 351  | MB3797c  | acyl-CoA dehydrogenase                  | 33.33 | 351  | MV_0300 | methyltransferase enzyme family       | 99.04 | 314  | BCG_3820c  | acyl-CoA dehydrogenase                  | 33.33 | 351  | MAP0255  | hypothetical protein                  | 339  | 100   |
| MAP4_3617 | hypothetical protein                                       | 104  | Rv3768c  | Conserved hypothetical protein rich in phosphate | 83.71 | 592  | MB3798c  | hypothetical protein                    | 83.71 | 592  | MV_0299 | hypothetical protein                  | 30.49 | 207  | BCG_2881c  | hypothetical protein                    | 83.71 | 592  | MAP0254  | hypothetical protein                  | 104  | 100   |
| MAP4_3618 | transposase                                                | 395  | Rv3755a  | Putative transposase                             | 73.53 | 61   | MB3797   | transposase                             | 83.02 | 61   | MV_0252 | hypothetical protein                  | 29.98 | 345  | BCG_0807c  | transposase                             | 83.02 | 61   | MAP0253  | hypothetical protein                  | 395  | 100   |
| MAP4_3619 | aminotransferase HsdC2                                     | 105  | Rv3772   | Possible histidinol-phosphate amin               | 75.07 | 353  | MB3800   | aminotransferase                        | 75.36 | 353  | MV_0250 | aminotransferase                      | 99.44 | 355  | BCG_3833   | aminotransferase                        | 75.36 | 353  | MAP0252c | aminotransferase                      | 105  | 100   |
| MAP4_3620 | hypothetical protein                                       | 153  | Rv14405c | Putative methyltransferase                       | 26.44 | 274  | MB14404c | methyltransferase                       | 26.44 | 274  | MV_0249 | hypothetical protein                  | 100   | 153  | BCG_14666c | methyltransferase                       | 26.44 | 274  | MAP0251c | hypothetical protein                  | 153  | 100   |
| MAP4_3621 | hypothetical protein                                       | 58   | Rv3773c  | hypothetical protein                             | 58.46 | 194  | MB0591   | ArxR family transcriptional re          | 48.9  | 434  | MV_0248 | hypothetical protein                  | 97.44 | 198  | BCG_0621   | ArxR family transcriptional reg         | 48.9  | 434  | MAP0250  | hypothetical protein                  | 195  | 100   |
| MAP4_3622 | enoyl-CoA hydratase/acyl-CoA hydratase Echa2               | 274  | Rv3774   | Possible enoyl-CoA hydratase Echa2               | 83.94 | 274  | MB3803   | enoyl-CoA hydratase                     | 83.94 | 274  | MV_0247 | enoyl-CoA hydratase                   | 98.27 | 274  | BCG_3836   | enoyl-CoA hydratase                     | 83.94 | 274  | MAP0249  | hypothetical protein                  | 274  | 100   |
| MAP4_3623 | lipase LipE                                                | 614  | Rv3775   | Possible lipase LipE                             | 87.47 | 415  | MB3804   | lipase LipE                             | 87.47 | 415  | MV_0246 | lipase LipE                           | 98.79 | 414  | BCG_3837   | lipase LipE                             | 87.47 | 415  | MAP0248  | hypothetical protein                  | 614  | 100   |
| MAP4_3624 | hypothetical protein                                       | 63   | Rv3624   | Acetyl-coenzyme A synthetase Acs I               | 38.71 | 651  | MB3691   | acetyl-CoA synthetase                   | 38.71 | 651  | MV_0245 | hypothetical protein                  | 100   | 63   | BCG_3725   | acetyl-CoA synthetase                   | 38.71 | 651  | MAP0247c | hypothetical protein                  | 63   | 100   |
| MAP4_3625 | hypothetical protein                                       | 372  | Rv2629   | hypothetical protein                             | 52.46 | 374  | MB2662   | hypothetical protein                    | 52.46 | 374  | MV_0244 | hypothetical protein                  | 98.92 | 372  | BCG_2656   | hypothetical protein                    | 52.46 | 374  | MAP0246  | hypothetical protein                  | 372  | 100   |
| MAP4_3626 | oxidoreductase                                             | 323  | Rv3777   | Possible oxidoreductase                          | 77.23 | 328  | MB3806   | oxidoreductase                          | 77.54 | 328  | MV_0242 | quinone oxidoreductase                | 98.76 | 326  | BCG_3839   | oxidoreductase                          | 77.54 | 328  | MAP0245  | hypothetical protein                  | 323  | 100   |
| MAP4_3627 | aminotransferase                                           | 398  | Rv3778c  | Possible aminotransferase                        | 67.44 | 398  | MB3807c  | aminotransferase                        | 67.44 | 398  | MV_0241 | lysine desulfurase                    | 100   | 398  | BCG_3840c  | aminotransferase                        | 67.44 | 398  | MAP0244  | hypothetical protein                  | 398  | 100   |
| MAP4_3628 | conserved alanine and leucine rich membrane protein        | 657  | Rv3779   | Possible conserved transmembrane                 | 76.73 | 666  | MB3808   | transmembrane protein alan              | 76.73 | 666  | MV_3054 | GNAT family acyltransferase           | 33.28 | 597  | BCG_3841   | transmembrane protein alanin            | 76.73 | 666  | MAP0243  | hypothetical protein                  | 657  | 100   |
| MAP4_3629 | hypothetical protein                                       | 168  | Rv3780   | hypothetical protein                             | 85.29 | 178  | MB3809   | hypothetical protein                    | 85.29 | 178  | MV_0239 | hypothetical protein                  | 98.82 | 169  | BCG_3842   | hypothetical protein                    | 85.29 | 178  | MAP0242  | hypothetical protein                  | 168  | 100   |
| MAP4_3630 | O-antigen lipopolysaccharide transport ATP-binding protein | 208  | Rv3781   | Probable O-antigen lipopolysacchar               | 90.15 | 273  | MB3810   | O-antigen lipopolysaccharide            | 90.15 | 273  | MV_0238 | O-antigen export system ATP-bind      | 98.81 | 253  | BCG_3843   | O-antigen lipopolysaccharide            | 90.15 | 273  | MAP0241c | hypothetical protein                  | 208  | 100   |
| MAP4_3631 | L-rhamnosyltransferase                                     | 304  | Rv3782   | UDP-galactofuranosyl transferase G               | 10.13 | 304  | MB3811   | L-rhamnosyltransferase                  | 10.13 | 304  | MV_0237 | glycosyl transferase                  | 99.67 | 304  | BCG_3844   | L-rhamnosyltransferase                  | 10.13 | 304  | MAP0240  | rflB                                  | 304  | 100   |
| MAP4_3632 | O-antigen lipopolysaccharide transport membrane protein    | 276  | Rv3783   | Probable O-antigen lipopolysacchar               | 89.64 | 280  | MB3812   | O-antigen lipopolysaccharide            | 89.64 | 280  | MV_0236 | O-antigen ABC transporter perme       | 100   | 276  | BCG_3845   | O-antigen lipopolysaccharide            | 89.64 | 280  | MAP0239  | hypothetical protein                  | 276  | 100   |
| MAP4_3633 | putative diacylglycerol kinase                             | 158  | Rv3806   | Probable diacylglycerol kinase                   | 29.29 | 295  | MB3440   | diacylglycerol kinase                   | 29.29 | 295  | MV_0235 | laurate catabolism diacylglycerol T   | 98.31 | 295  | BCG_3476   | diacylglycerol kinase                   | 29.29 | 295  | MAP0238  | hypothetical protein                  | 295  | 100   |
| MAP4_3634 | putative nucleoside diphosphate kinase                     | 80   | Rv3788   | hypothetical protein                             | 80    | 161  | MB3813   | nucleoside diphosphate kinase           | 80    | 161  | MV_0234 | nucleoside diphosphate kinase reg     | 98.73 | 158  | BCG_3850   | nucleoside diphosphate kinase           | 80    | 161  | MAP0237  | nucleoside diphosphate kinase regulat | 158  | 100   |
| MAP4_3635 | putative conserved membrane protein                        | 134  | Rv3789   | GTR4 family protein                              | 88.43 | 121  | MB3818   | hypothetical protein                    | 88.43 | 121  | MV_0233 | membrane protein                      | 99.25 | 134  | BCG_3851   | hypothetical protein                    | 88.43 | 121  | MAP0236  | hypothetical protein                  | 134  | 100   |
| MAP4_3636 | putative oxidoreductase                                    | 466  | Rv3790   | Decarboxymethyl-beta-D-ribose                    | 73.61 | 461  | MB3819   | oxidoreductase                          | 73.61 | 461  | MV_0232 | oxidoreductase, FAD-binding           | 99.79 | 466  | BCG_3852   | oxidoreductase                          | 73.61 | 461  | MAP0235  | hypothetical protein                  | 466  | 100   |
| MAP4_3637 | short chain type dehydrogenase/acyl                        | 254  | Rv3791   | Decarboxymethyl-beta-D-ribose                    | 83.33 | 254  | MB3820   | short chain dehydrogenase               | 83.33 | 254  | MV_0231 | short chain dehydrogenase             | 100   | 254  | BCG_3853   | short chain dehydrogenase               | 83.33 | 254  | MAP0234  | hypothetical protein                  | 254  | 100   |
| MAP4_3638 | putative arabinosyltransferase                             | 77   | Rv3792   | Arabinosyltransferase AfaA                       | 77.38 | 643  | MB3821   | arabinosyltransferase                   | 77.38 | 643  | MV_0230 | hypothetical protein                  | 96.87 | 682  | BCG_3854   | hypothetical protein                    | 77.38 | 643  | MAP0233  | hypothetical protein                  | 77   | 100   |
| MAP4_3639 | integral membrane indolylacetylserine                      | 1094 | Rv3793   | integral membrane indolylacetylserine            | 85.32 | 1094 | MB3822   | indolylacetylserine                     | 85.32 | 1094 | MV_0229 | arabinosyltransferase A               | 99.62 | 1052 | BCG_3855   | integral membrane indolylace            | 85.32 | 1094 | MAP0232  | EmcB                                  | 1094 | 100   |
| MAP4_3640 | hypothetical protein                                       | 226  | Rv2036   | hypothetical protein                             | 71.57 | 213  | MB2062   | hypothetical protein                    | 71.57 | 213  | MV_0227 | hypothetical protein                  | 100   | 207  | BCG_2055   | hypothetical protein                    | 71.57 | 213  | MAP0231c | hypothetical protein                  | 226  | 100   |
| MAP4_3641 | transcriptional regulator, ArcN family                     | 388  | Rv1267c  | Probable transcriptional regulator               | 59.68 | 388  | MB1298c  | transcriptional regulator Emh           | 59.68 | 388  | MV_0226 | EmhR protein                          | 99.48 | 384  | BCG_1326c  | transcriptional regulator prot          | 59.68 | 388  | MAP0230  | EmhR                                  | 388  | 99.74 |
| MAP4_3642 | membrane indolylacetylserine transferase                   | 41   | Rv3795   | membrane indolylacetylserine transferase         | 83.33 | 1094 | MB3823   | indolylacetylserine transferase         | 83.33 | 1094 | MV_0225 | arabinosyltransferase C               | 99.62 | 1052 | BCG_3856   | membrane indolylacetylserine            | 83.33 | 1094 | MAP0229  | EmhB                                  | 41   | 100   |
| MAP4_3643 | membrane indolylacetylserine transferase                   | 105  | Rv3795   | integral membrane indolylacetylserine            | 83.33 | 1098 | MB3824   | indolylacetylserine transferase         | 83.33 | 1098 | MV_0224 | arabinosyltransferase A               | 99.62 | 1052 | BCG_3857   | integral membrane indolylace            | 83.33 | 1098 | MAP0228  | EmhB                                  | 105  | 99.91 |
| MAP4_3644 | hypothetical protein                                       | 171  | Rv1031   | Possible potassium-transporting ATP              | 30.77 | 189  | MB1060   | potassium-transporting ATPa             | 30.77 | 189  | MV_0223 | hypothetical protein                  | 98.25 | 171  | BCG_1089   | potassium-transporting ATPase           | 30.77 | 189  | MAP0227  | hypothetical protein                  | 171  | 100   |
| MAP4_3645 | putative luciferase-like monooxygenase                     | 309  | Rv0940c  | Possible oxidoreductase                          | 32.79 | 288  | MB0965c  | oxidoreductase                          | 32.79 | 288  | MV_3379 | MncJ protein                          | 54.55 | 288  | BCG_0994c  | oxidoreductase                          | 32.79 | 288  | MAP0226  | hypothetical protein                  | 309  | 100   |
| MAP4_3646 | transcriptional regulator, ArcN family                     | 351  | Rv3291c  | Possible transcriptional regulator               | 33.05 | 150  | MB3319c  | ArcN family transcriptional regulat     | 33.05 | 150  | MV_3380 | ArcN family transcriptional regulat   | 54.27 | 327  | BCG_3320c  | ArcN family transcriptional reg         | 33.05 | 150  | MAP0225  | hypothetical protein                  | 351  | 100   |
| MAP4_3647 | acyl-CoA dehydrogenase FadE35 FadE35                       | 589  | Rv3797   | Possible acyl-CoA dehydrogenase F                | 83.5  | 593  | MB3826   | acyl-CoA dehydrogenase                  | 83.5  | 593  | MV_0222 | acyl-CoA dehydrogenase                | 99.15 | 589  | BCG_3859   | acyl-CoA dehydrogenase                  | 83.5  | 593  | MAP0224  | FadE35                                | 589  | 100   |
| MAP4_3648 | transcriptional regulator, ArcC family                     | 277  | Rv3833   | Transcriptional regulator ArcC family            | 25.85 | 293  | MB3863   | ArcC family transcriptional regul       | 25.85 | 293  | MV_0221 | ArcC family transcriptional regulat   | 98.25 | 288  | BCG_3863   | ArcC family transcriptional reg         | 25.85 | 293  | MAP0223  | hypothetical protein                  | 277  | 100   |
| MAP4_3649 | putative methyltransferase                                 | 297  | Rv3767c  | Possible S-adenosylmethionine-dep                | 48.61 | 314  | MB3793c  | hypothetical protein                    | 48.61 | 314  | MV_0219 | methyltransferase, putative, family   | 96.77 | 279  | BCG_3826c  | methyltransferase, putative, family     | 48.61 | 314  | MAP0222  | hypothetical protein                  | 297  | 100   |
| MAP4_3650 | propionyl-CoA carboxylase beta chain 4 AccD4               | 524  | Rv3799c  | Possible propionyl-CoA carboxylase               | 85.3  | 522  | MB3829c  | propionyl-CoA carboxylase beta ch       | 85.3  | 522  | MV_0220 | propionyl-CoA carboxylase beta ch     | 99.62 | 524  | BCG_3861c  | propionyl-CoA carboxylase bet           | 85.3  | 522  | MAP0221  | AccD4_1                               | 524  | 100   |
| MAP4_3651 | putative polyketide synthase Pks13                         | 1791 | Rv3800c  | polyketide synthase Pks13                        | 81.26 | 1733 | MB3830c  | polyketide synthase                     | 81.26 | 1733 | MV_0218 | polyketide synthase                   | 99.61 | 1791 | BCG_3862c  | polyketide synthase                     | 81.26 | 1733 | MAP0220  | hypothetical protein                  | 1791 | 99.94 |
| MAP4_3652 | long-chain fatty-acyl-CoA ligase FadD32                    | 632  | Rv3801c  | long-chain fatty-acyl-CoA ligase FadD32          | 83.33 | 637  | MB3831c  | long-chain fatty-acyl-CoA lig           | 83.33 | 637  | MV_0217 | long-chain fatty-acyl-CoA ligase      | 99.68 | 637  | BCG_3864   | long-chain fatty-acyl-CoA liga          | 83.33 | 637  | MAP0219  | long-chain fatty-acyl-CoA ligase      | 632  | 100   |
| MAP4_3653 | hypothetical protein                                       | 336  | Rv3802c  | Possible conserved membrane prot                 | 75.82 | 336  | MB3832c  | hypothetical protein                    | 75.82 | 336  | MV_0216 | hypothetical protein                  | 100   | 336  | BCG_3865   | hypothetical protein                    | 75.82 | 336  | MAP0218  | hypothetical protein                  | 336  | 100   |
| MAP4_3654 | secreted fibronectin-binding protein antigenpre in P       | 82   | Rv3803c  | secreted MPT51/MP851 antigen pre                 | 82.57 | 299  | MB3833c  | secreted MPT51/MP851 antigen            | 82.57 | 299  | MV_0215 | hypothetical protein                  | 99.33 | 305  | BCG_3865c  | hypothetical protein                    | 82.57 | 299  | MAP0217  | FbpC1                                 | 305  | 100   |
| MAP4_3655 | secreted fibronectin-binding protein antigenpre in P       | 82   | Rv3804c  | secreted antigen 85-A FbpA (imocy                | 82.25 | 338  | MB3834c  | secreted antigen 85-A FbpA              | 82.25 | 338  | MV_0214 | secreted antigen 85-A                 | 99.71 | 347  | BCG_3866c  | hypothetical protein                    | 82.25 | 338  | MAP0216  | FbpA                                  | 338  | 100   |
| MAP4_3656 | hypothetical protein                                       | 639  | Rv3805c  | Possible arabinosyltransferase                   | 82.28 | 627  | MB3835c  | transmembrane protein                   | 82.11 | 627  | MV_0212 | hypothetical protein                  | 99.53 | 660  | BCG_3867c  | hypothetical protein                    | 82.11 | 627  | MAP0215  | hypothetical protein                  | 639  | 100   |
| MAP4_3657 | putative conserved membrane protein                        | 305  | Rv3806c  | Decarboxymethyl-beta-D-ribose                    | 78.74 | 302  | MB3836c  | phosphoglycerate dehydrogenase          | 79.07 |      |         |                                       |       |      |            |                                         |       |      |          |                                       |      |       |

Table S1 continued

|           |                                                          |       |         |                                        |       |     |          |                                   |       |     |          |                                       |       |     |           |                                 |       |     |          |                      |     |       |
|-----------|----------------------------------------------------------|-------|---------|----------------------------------------|-------|-----|----------|-----------------------------------|-------|-----|----------|---------------------------------------|-------|-----|-----------|---------------------------------|-------|-----|----------|----------------------|-----|-------|
| MAP4_3701 | putative CBX/CFX family protein                          | 613   | Rv3884c | ESX conserved component EcoA2          | 68.07 | 619 | Mb3914c  | CBX/CFX family protein            | 88.07 | 619 | MbV_0160 | ATPase AAA                            | 99.35 | 613 | BCG_3939c | hypothetical protein            | 88.07 | 619 | MAP0167  | hypothetical protein | 613 | 100   |
| MAP4_3705 | alanine and proline rich membrane-anchored myosin        | 553   | Rv3886c | Probable alanine and proline rich      | 85.74 | 550 | Mb3916c  | secreted alanine and proline      | 85.74 | 550 | MbV_0158 | subtilase                             | 98.89 | 552 | BCG_3941c | hypothetical protein            | 85.74 | 550 | MAP0165  | hypothetical protein | 553 | 100   |
| MAP4_3706 | hypothetical protein                                     | 643   | Rv3887c | ESX conserved component EcoD2          | 64.26 | 509 | Mb3917c  | hypothetical protein              | 64.26 | 509 | MbV_0157 | hypothetical protein Smc4             | 98.94 | 507 | BCG_3942c | hypothetical protein            | 64.26 | 509 | MAP0164  | hypothetical protein | 509 | 100   |
| MAP4_3711 | hypothetical protein                                     | 341   | Rv3888c | Probable conserved membrane prot       | 88.79 | 341 | Mb3920c  | hypothetical protein              | 33.8  | 289 | MbV_0155 | hypothetical protein                  | 100   | 307 | BCG_3943c | hypothetical protein            | 80.83 | 276 | MAP0163  | hypothetical protein | 341 | 100   |
| MAP4_3712 | ESX-1 EspG family protein                                | 80.07 | Rv3889c | ESX-2 secretion-associated protein     | 80.07 | 276 | Mb3918c  | hypothetical protein              | 88.24 | 72  | MbV_0155 | hypothetical protein                  | 100   | 276 | BCG_3945c | hypothetical protein            | 80.07 | 276 | MAP0162  | hypothetical protein | 276 | 100   |
| MAP4_3713 | ESAT-6 like protein EsxC                                 | 95    | Rv3890c | ESAT-6 like protein EsxC (ESAT-6 like) | 76.84 | 95  | Mb3919c  | ESAT-6 like protein 11            | 74.55 | 124 | MbV_0154 | hypothetical protein                  | 100   | 95  | BCG_3946c | ESAT-6 like protein 11 esxC     | 74.55 | 124 | MAP0161  | hypothetical protein | 95  | 100   |
| MAP4_3714 | ESAT-6 like protein EsxD                                 | 104   | Rv3891c | Possible ESAT-6 like protein EsxD      | 76.92 | 107 | Mb3920c  | hypothetical protein              | 76.92 | 107 | MbV_0153 | hypothetical protein                  | 100   | 104 | BCG_3947c | hypothetical protein            | 76.92 | 107 | MAP0160  | hypothetical protein | 100 | 99    |
| MAP4_3715 | transposase_15900                                        | 406   | Rv3797  | Putative transposase for insertion     | 20.61 | 364 | Mb3949   | transposase                       | 28.35 | 350 | MbV_0256 | transposase                           | 29.01 | 350 | BCG_3977  | transposase fusion protein      | 28.35 | 350 | MAP0159  | hypothetical protein | 406 | 100   |
| MAP4_3716 | PE family protein PE69                                   | 396   | Rv3892c | PE family protein PE69                 | 67.84 | 396 | Mb3921c  | PE family protein                 | 68.09 | 399 | MbV_2746 | PE family protein                     | 34.48 | 461 | BCG_3948c | PE family protein               | 67.84 | 399 | MAP0158  | hypothetical protein | 396 | 100   |
| MAP4_3717 | PE family protein PE36                                   | 83.12 | Rv3893c | PE family protein PE36                 | 83.12 | 77  | Mb3922c  | PE family protein                 | 83.12 | 77  | MbV_0151 | PE family protein                     | 100   | 103 | BCG_3949c | PE family protein               | 83.12 | 77  | MAP0157  | hypothetical protein | 396 | 100   |
| MAP4_3718 | hypothetical protein                                     | 132   | Rv1394c | Probable cytochrome P450 132 Cyp3      | 37.21 | 461 | Mb1429c  | cytochrome P450 132               | 37.21 | 461 | MbV_0150 | glyoxalase                            | 98.48 | 132 | BCG_1455c | cytochrome P450 132 cyp132      | 37.21 | 461 | MAP0156  | hypothetical protein | 132 | 100   |
| MAP4_3719 | Transcriptional regulator, TetR family                   | 32.62 | Rv0196  | Possible transcriptional regulatory p  | 32.62 | 194 | Mb0202c  | transcriptional regulator         | 32.62 | 194 | MbV_0149 | TetR family transcriptional regulat   | 98.44 | 192 | BCG_0233  | transcriptional regulatory prot | 32.62 | 194 | MAP0155  | hypothetical protein | 192 | 100   |
| MAP4_3720 | enoyl-CoA hydratase                                      | 250   | Rv1070c | Probable enoyl-CoA hydratase EsxA      | 70.23 | 257 | Mb1099c  | enoyl-CoA hydratase               | 37.43 | 257 | MbV_0148 | enoyl-CoA hydratase/isomerase         | 100   | 260 | BCG_1128c | enoyl-CoA hydratase             | 37.23 | 257 | MAP0154  | hypothetical protein | 250 | 100   |
| MAP4_3721 | two component sensor histidine kin                       | 442   | Rv0902c | Two component sensor histidine kin     | 61.05 | 446 | Mb0925c  | two component sensor histid       | 61.05 | 445 | MbV_0147 | sensor histidine kinase               | 99.55 | 442 | BCG_0954c | two component sensor histidi    | 61.05 | 446 | MAP0153  | hypothetical protein | 442 | 100   |
| MAP4_3724 | acyl-CoA dehydrogenase FadZ5                             | 36.36 | Rv3746c | Probable acyl-CoA dehydrogenase F      | 36.36 | 389 | Mb3030c  | acyl-CoA dehydrogenase            | 36.36 | 389 | MbV_0145 | acyl-CoA dehydrogenase                | 100   | 403 | BCG_3303c | acyl-CoA dehydrogenase fadZ5    | 36.36 | 389 | MAP0152  | hypothetical protein | 260 | 100   |
| MAP4_3727 | putative FAD dependent oxidoreductase                    | 50    | Rv3858c | Probable NADH-dependent glutama        | 50    | 488 | Mb3888c  | glutamate synthase                | 29.71 | 488 | MbV_0142 | FAD dependent oxidoreductase          | 97.48 | 317 | BCG_3921c | glutamate synthase subunit b    | 50    | 488 | MAP0147  | hypothetical protein | 217 | 100   |
| MAP4_3728 | putative ABC transporter inner membrane protein          | 23.7  | Rv3757c | Possible osmoprotectant (glycine bet   | 28.72 | 229 | Mb3783c  | glycine betaine/garniteine/cho    | 28.72 | 229 | MbV_0141 | aliphatic sulfonolipase ABC transport | 99.14 | 233 | BCG_3816c | osmoprotectant (glycine betai   | 28.72 | 229 | MAP0146  | hypothetical protein | 233 | 100   |
| MAP4_3729 | ABC transporter, sulfonate-binding pro                   | 30.86 | Rv0411c | Probable glutamine-binding lipop       | 30.86 | 328 | Mb1059c  | glutamine-binding lipoprotein     | 30.86 | 328 | MbV_0141 | liponate binding protein              | 99.69 | 321 | BCG_0450c | glutamine-binding lipoprotein   | 30.86 | 328 | MAP0145  | hypothetical protein | 321 | 100   |
| MAP4_3730 | nitrate/sulfate/bicarbonate transport ABC transporter    | 305   | Rv2397c | sulfate-transport ATP-binding prot     | 44.98 | 351 | Mb2419c  | sulfate-transport ABC transpo     | 44.98 | 351 | MbV_0140 | nitrata/sulfate/bicarbonate ABC       | 96.28 | 342 | BCG_2412c | sulfate-transport ATP-binding   | 44.98 | 351 | MAP0144  | hypothetical protein | 305 | 100   |
| MAP4_3731 | hypothetical protein                                     | 102   | Rv1261  | Putative pyruvate dehydrogenase E1     | 32.26 | 901 | Mb2265c  | pyruvate dehydrogenase subu       | 32.26 | 901 | MbV_0139 | hypothetical protein                  | 100   | 93  | BCG_1025c | pyruvate dehydrogenase subu     | 32.26 | 901 | MAP0143  | hypothetical protein | 100 | 100   |
| MAP4_3732 | putative transporter, major facilitator family protein   | 364   | Rv1410c | Aminoglycosides/tetracycline-tran      | 30.97 | 518 | Mb1445c  | aminoglycosides/tetracycline      | 30.97 | 518 | MbV_0138 | transporter, major facilitator fami   | 99.43 | 405 | BCG_1471c | aminoglycosides/tetracycline-s  | 30.97 | 518 | MAP0142c | hypothetical protein | 100 | 96.09 |
| MAP4_3733 | coenzyme F420-dependent oxidoreductase                   | 43.8  | Rv3520c | coenzyme F420-dependent                | 43.8  | 347 | Mb3520c  | coenzyme F420-dependent           | 43.8  | 347 | MbV_0137 | oxidoreductase                        | 99.71 | 347 | BCG_3984c | coenzyme F420-dependent oxi     | 43.8  | 347 | MAP0141  | hypothetical protein | 347 | 100   |
| MAP4_3734 | hypothetical protein                                     | 140   | Rv3684  | Probable tyase                         | 36.36 | 346 | Mb3709   | tyase                             | 36.36 | 346 | MbV_0136 | hypothetical protein                  | 100   | 161 | BCG_3783  | tyase                           | 36.36 | 346 | MAP0140  | hypothetical protein | 140 | 100   |
| MAP4_3735 | Transcriptional regulator, PadR family                   | 297   | Rv1176c | hypothetical protein                   | 33.7  | 189 | Mb1209c  | hypothetical protein              | 33.7  | 189 | MbV_0135 | PadR family transcriptional regulat   | 99.51 | 204 | BCG_1239c | hypothetical protein            | 33.7  | 189 | MAP0139c | hypothetical protein | 297 | 100   |
| MAP4_3736 | hypothetical protein                                     | 211   | Rv1701  | Probable integrase/recombinase         | 43.24 | 311 | Mb1727   | site-specific tyrosine recombi    | 43.24 | 311 | MbV_0134 | hypothetical protein                  | 98.99 | 297 | BCG_1739  | site-specific tyrosine recombin | 43.24 | 311 | MAP0138c | hypothetical protein | 297 | 100   |
| MAP4_3737 | hypothetical protein                                     | 88    | Rv2299c | Probable chaperone protein HtpG (H     | 30    | 647 | Mb2321c  | heat shock protein 90             | 30    | 647 | MbV_0133 | hypothetical protein                  | 100   | 88  | BCG_2315c | heat shock protein 90           | 30    | 647 | MAP0137c | hypothetical protein | 88  | 100   |
| MAP4_3738 | hypothetical protein                                     | 117   | Rv1244  | Probable lipoprotein LipQ7             | 40    | 286 | Mb1276c  | lipoprotein LipQ7                 | 40    | 286 | MbV_0132 | glyoxalase                            | 100   | 117 | BCG_1304  | lipoprotein lipQ7               | 40    | 286 | MAP0136  | hypothetical protein | 140 | 100   |
| MAP4_3739 | cyclopropane fatty-acyl-phospholipid synthase L C ma     | 70.32 | Rv2592c | Cyclopropane fatty-acyl-phosphol       | 70.32 | 287 | Mb1932c  | cyclopropane fatty-acyl-phosph    | 70.32 | 287 | MbV_0131 | hypothetical protein                  | 99.72 | 294 | BCG_1461c | lipoprotein fatty-acyl-phosph   | 70.32 | 287 | MAP0135  | hypothetical protein | 294 | 100   |
| MAP4_3740 | hypothetical protein                                     | 191   | Rv2530  | Probable conserved membrane prot       | 44.48 | 405 | Mb2043c  | hypothetical protein              | 44.48 | 405 | MbV_0129 | hypothetical protein                  | 97.28 | 191 | BCG_0573  | hypothetical protein            | 34.48 | 405 | MAP0134c | hypothetical protein | 191 | 100   |
| MAP4_3741 | putative transporter, major facilitator family protein   | 39.84 | Rv1201  | Probable integrase/recombinase         | 29.84 | 425 | MbV_4277 | major facilitator superfamily mem | 29.84 | 425 | MbV_4277 | phosphate transport system regula     | 33    | 449 | BCG_1260  | integral membrane transport     | 29.84 | 425 | MAP0133c | hypothetical protein | 398 | 100   |
| MAP4_3742 | Phosphate transport system regulatory proteinPho2        | 211   | Rv0822c | phosphate transport system regula      | 61.9  | 213 | Mb0844c  | phosphate transport system regula | 61.9  | 213 | MbV_0768 | phosphate transport system regula     | 63.03 | 222 | BCG_0874c | phosphate-transport system tr   | 61.9  | 213 | MAP0132c | Pho2_2               | 211 | 100   |
| MAP4_3743 | putative acyltransferase, wax ester synthase-like Acyl-C | 63.96 | Rv3734c | Putative triacylglycerol synthase (d   | 63.96 | 454 | Mb3734c  | hypothetical protein              | 63.96 | 454 | MbV_0128 | bifunctional wax ester synthase/ac    | 98.89 | 451 | BCG_3794c | hypothetical protein            | 63.96 | 454 | MAP0131c | hypothetical protein | 451 | 100   |
| MAP4_3744 | putative sigma factor regulatory prot                    | 30.34 | Rv2653  | Probable sigma factor regulatory prot  | 30.34 | 263 | Mb2653c  | hypothetical protein              | 30.34 | 263 | MbV_0127 | hypothetical protein                  | 98.24 | 263 | BCG_0924c | hypothetical protein            | 30.34 | 263 | MAP0130c | hypothetical protein | 100 | 100   |
| MAP4_3745 | D-2-phosphoglycerate dehydrogenase                       | 35.08 | Rv2956c | Probable D-2-phosphoglycerate dehyd    | 35.08 | 528 | Mb3020c  | D-2-phosphoglycerate dehyd        | 35.08 | 528 | MbV_0123 | hypothetical protein                  | 99.08 | 525 | BCG_2017c | D-2-phosphoglycerate dehydr     | 35.08 | 528 | MAP0129c | hypothetical protein | 100 | 100   |
| MAP4_3746 | luciferase-like monoxygenase                             | 285   | Rv2168c | hypothetical protein                   | 35.07 | 288 | Mb2185c  | hypothetical protein              | 35.07 | 288 | MbV_0122 | hypothetical protein                  | 98.6  | 285 | BCG_3078c | hypothetical protein            | 35.07 | 288 | MAP0128c | hypothetical protein | 285 | 100   |
| MAP4_3747 | transmembrane carbonic anhydrase                         | 521   | Rv2371  | Probable transmembrane carbonic a      | 57.11 | 764 | Mb3301c  | transmembrane carbonic anhy       | 57.11 | 764 | MbV_0121 | carbonate dehydratase                 | 99.6  | 520 | BCG_3302  | transmembrane carbonic anhy     | 57.11 | 764 | MAP0127  | hypothetical protein | 521 | 100   |
| MAP4_3748 | hypothetical protein                                     | 56.06 | Rv1558  | hypothetical protein                   | 56.06 | 148 | Mb1584   | hypothetical protein              | 56.06 | 148 | MbV_0120 | hypothetical protein                  | 100   | 140 | BCG_1610  | hypothetical protein            | 56.06 | 148 | MAP0126  | hypothetical protein | 140 | 100   |
| MAP4_3749 | benzoinquinone methyltransferase                         | 231   | Rv0500c | Probable benzoinquinone methyltra      | 72.49 | 241 | Mb0500c  | benzoinquinone methyltransfer     | 72.49 | 241 | MbV_0119 | hypothetical protein                  | 99.13 | 231 | BCG_0905c | benzoinquinone methyltransfer   | 72.49 | 241 | MAP0125c | hypothetical protein | 231 | 100   |
| MAP4_3752 | PE family protein PE5                                    | 101   | Rv0285c | PE family protein PE5                  | 65.98 | 102 | Mb0293c  | PE family protein                 | 65.98 | 102 | MbV_0117 | PE family protein                     | 100   | 101 | BCG_0325c | PE family protein               | 65.98 | 102 | MAP0124c | hypothetical protein | 101 | 100   |
| MAP4_3753 | hypothetical protein                                     | 186   | Rv3455c | Probable rRNA pseudouridine synth      | 50    | 256 | Mb3484c  | rRNA pseudouridine synthase       | 50    | 297 | MbV_0116 | hypothetical protein                  | 99.39 | 186 | BCG_3520c | rRNA pseudouridine synthase     | 50    | 256 | MAP0123c | hypothetical protein | 186 | 100   |
| MAP4_3754 | hypothetical protein                                     | 140   | Rv3568c | 3,4-DHSA dioxygenase                   | 34.04 | 300 | Mb3027c  | pyrrolidone-carboxylate pept      | 54.84 | 222 | MbV_0115 | hypothetical protein                  | 99.24 | 131 | BCG_3633c | biphenyl-2,3-diol-1,2-dioxyge   | 34.04 | 300 | MAP0120c | hypothetical protein | 140 | 100   |
| MAP4_3755 | hypothetical protein                                     | 262   | Rv2219  | Probable conserved transmembran        | 48.48 | 250 | Mb2242   | transmembrane protein             | 43.59 | 250 | MbV_0114 | hypothetical protein                  | 98.88 | 262 | BCG_2235c | hypothetical protein            | 43.59 | 250 | MAP0119c | hypothetical protein | 262 | 100   |
| MAP4_3756 | hypothetical protein                                     | 255   | Rv3646c | Probable conserved transmembran        | 37.5  | 397 | Mb3646c  | transmembrane protein             | 37.5  | 397 | MbV_0113 | hypothetical protein                  | 99.36 | 35  | BCG_2064c | transmembrane protein rich in   | 37.5  | 397 | MAP0120c | hypothetical protein | 273 | 50    |
| MAP4_3757 | putative transmembrane protein                           | 122   | Rv0420c | Probable conserved transmembran        | 42.55 | 136 | Mb0420c  | hypothetical protein              | 42.55 | 136 | MbV_0112 | hypothetical protein                  | 98.25 | 114 | BCG_0459c | hypothetical protein            | 42.55 | 136 | MAP0118c | hypothetical protein | 114 | 100   |
| MAP4_3758 | hypothetical protein                                     | 74    | Rv2455c | Probable oxidoreductase (alpha sub     | 27.78 | 653 | Mb2482c  | oxidoreductase subunit alpha      | 27.78 | 653 | MbV_0111 | hypothetical protein                  | 100   | 74  | BCG_2475c | oxidoreductase subunit alpha    | 27.78 | 653 | MAP0117  | hypothetical protein | 74  | 100   |
| MAP4_3759 | Transcriptional regulator, TetR family                   | 29.5  | Rv1963c | Probable transcriptional regulator     | 29.5  | 406 | Mb1998c  | transcriptional regulator         | 29.5  | 406 | MbV_0110 | TetR family transcriptional regulat   | 99.51 | 410 | BCG_2002c | transcriptional regulatory prot | 29.5  | 406 | MAP0116  | hypothetical protein | 268 | 100   |
| MAP4_3760 | hypothetical protein                                     | 461   | Rv3980c | Immunogenic protein Mpt64 (entire)     | 23.16 | 228 | Mb3020c  | hypothetical protein              | 23.16 | 228 | MbV_0109 | hypothetical protein                  | 99.62 | 261 | BCG_1713c | transcriptional regulatory prot | 30.77 | 244 | MAP0115  | hypothetical protein | 461 | 100   |
| MAP4_3761 | integral membrane protein                                | 148   | Rv2296c | hypothetical protein                   | 49.63 | 165 | Mb2296c  | hypothetical protein              | 49.63 |     |          |                                       |       |     |           |                                 |       |     |          |                      |     |       |

Table S1 continued

|           |                                                                         |     |         |                                                           |       |     |         |                                                   |       |     |         |                                                   |       |     |           |                                                   |       |     |         |                                          |     |       |
|-----------|-------------------------------------------------------------------------|-----|---------|-----------------------------------------------------------|-------|-----|---------|---------------------------------------------------|-------|-----|---------|---------------------------------------------------|-------|-----|-----------|---------------------------------------------------|-------|-----|---------|------------------------------------------|-----|-------|
| MAP4_3811 | hypothetical protein                                                    | 289 | Rv3529c | hypothetical protein                                      | 28.28 | 384 | Mv0559c | hypothetical protein                              | 28.28 | 384 | Mv0559c | hypothetical protein                              | 99.74 | 389 | BCG_3593c | hypothetical protein                              | 28.28 | 384 | MAP008c | hypothetical protein                     | 287 | 100   |
| MAP4_3818 | hypothetical protein                                                    | 267 | Rv1742  | hypothetical protein                                      | 33.87 | 245 | Mb1771  | hypothetical protein                              | 33.87 | 221 | Mv0004  | AP endonuclease, family 2                         | 97    | 267 | BCG_1781  | hypothetical protein                              | 33.87 | 221 | MAP057c | hypothetical protein                     | 360 | 100   |
| MAP4_3819 | hypothetical protein                                                    | 400 | Rv3531c | hypothetical protein                                      | 25.54 | 375 | Mb0216  | hypothetical protein                              | 25.54 | 375 | Mv0053  | hypothetical protein                              | 97.51 | 404 | BCG_3395c | hypothetical protein                              | 25.54 | 375 | MAP059c | hypothetical protein                     | 411 | 97.81 |
| MAP4_3820 | putative hydrolase                                                      | 304 | Rv0455c | possible hydrolase                                        | 78.07 | 298 | Mv0045c | possible hydrolase                                | 78.07 | 298 | Mv0005  | Mn2/2n/2n-ABC transporter permease                | 99.67 | 304 | BCG_0076c | hypothetical protein                              | 78.07 | 298 | MAP055c | hypothetical protein                     | 304 | 100   |
| MAP4_3821 | oxidoreductase                                                          | 262 | Rv0044c | Possible oxidoreductase                                   | 83.2  | 264 | Mv0045c | oxidoreductase                                    | 83.2  | 264 | Mv0061  | Mnnci protein                                     | 98.84 | 259 | BCG_0075c | oxidoreductase                                    | 83.2  | 264 | MAP054c | hypothetical protein                     | 262 | 100   |
| MAP4_3822 | Transcriptional regulator, GntR family                                  | 246 | Rv0044c | Probable transcriptional regulator                        | 81    | 244 | Mv0044c | GntR family transcriptional regulator             | 81    | 244 | Mv0069  | GntR family transcriptional regulator             | 99.19 | 246 | BCG_0074c | GntR family transcriptional regulator             | 81    | 244 | MAP053c | hypothetical protein                     | 246 | 100   |
| MAP4_3823 | amino acid ABC transporter, substrate binding and permease              | 598 | Rv0411c | Probable glutamine-binding lipoprotein                    | 25.24 | 328 | Mb0419c | glutamine-binding lipoprotein                     | 25.24 | 328 | Mv0059  | amino acid ABC transporter permease               | 99.5  | 598 | BCG_0045c | glutamine-binding lipoprotein                     | 25.24 | 328 | MAP052c | hypothetical protein                     | 597 | 100   |
| MAP4_3824 | amino acid ABC transporter, ATP-binding protein                         | 248 | Rv0044c | Probable sulfate-transport ABC transporter                | 39.74 | 276 | Mb0216  | sulfate-transport ABC transporter                 | 40.18 | 351 | Mv0058  | ATP-binding protein                               | 99.8  | 248 | BCG_2412c | sulfate-transport ATP-binding protein             | 40.18 | 351 | MAP051c | hypothetical protein                     | 248 | 100   |
| MAP4_3825 | Transcriptional regulator, MarR family                                  | 182 | Rv0042c | Possible transcriptional regulator                        | 85.8  | 208 | Mv0043c | MarR family transcriptional regulator             | 85.8  | 208 | Mv0057  | MarR family transcriptional regulator             | 99.4  | 187 | BCG_0073c | transcriptional regulatory protein                | 85.8  | 208 | MAP050c | hypothetical protein                     | 182 | 100   |
| MAP4_3826 | short chain dehydrogenase                                               | 223 | Rv0484c | Probable short-chain type oxidoreductase                  | 36.8  | 251 | Mv0494c | short-chain type oxidoreductase                   | 36.8  | 251 | Mv0056  | short chain dehydrogenase                         | 99.1  | 223 | BCG_0252c | short-chain type oxidoreductase                   | 36.8  | 251 | MAP049c | short chain dehydrogenase                | 223 | 100   |
| MAP4_3827 | leucyl-tRNA synthetase LeuS                                             | 969 | Rv0041  | leucyl-tRNA synthetase LeuS                               | 85.79 | 969 | Mv0042  | leucyl-tRNA synthetase                            | 85.79 | 969 | Mv0055  | leucyl-tRNA synthetase                            | 99.48 | 992 | BCG_0072c | leucyl-tRNA synthetase                            | 85.79 | 969 | MAP048c | leucyl-tRNA synthetase                   | 969 | 100   |
| MAP4_3828 | secreted proline rich protein                                           | 361 | Rv0040c | Secreted proline rich protein Mtc28                       | 58.22 | 310 | Mb0041c | secreted proline rich protein                     | 58.22 | 310 | Mv0054  | proline-rich 28 kDa antigen                       | 86.89 | 366 | BCG_0071c | hypothetical protein                              | 58.22 | 310 | MAP047c | hypothetical protein                     | 407 | 100   |
| MAP4_3829 | putative conserved membrane protein                                     | 113 | Rv0039c | Possible conserved transmembrane protein                  | 69.3  | 115 | Mv0040c | transmembrane protein                             | 69.3  | 115 | Mv0053  | hypothetical protein                              | 100   | 113 | BCG_0070c | hypothetical protein                              | 69.3  | 115 | MAP046c | hypothetical protein                     | 113 | 100   |
| MAP4_3830 | hypothetical protein                                                    | 201 | Rv0038  | hypothetical protein                                      | 90.95 | 202 | Mv0039  | hypothetical protein                              | 90.95 | 202 | Mv0052  | hypothetical protein                              | 100   | 201 | BCG_0069c | hypothetical protein                              | 90.95 | 202 | MAP045c | hypothetical protein                     | 201 | 100   |
| MAP4_3831 | hypothetical protein                                                    | 428 | Rv0037c | Probable conserved integral membrane protein              | 79.67 | 441 | Mv0038c | hypothetical protein                              | 79.67 | 441 | Mv0051  | transporter, major facilitator family             | 98.83 | 428 | BCG_0068c | integral membrane protein                         | 79.67 | 441 | MAP044c | hypothetical protein                     | 428 | 100   |
| MAP4_3832 | hypothetical protein                                                    | 257 | Rv0036c | hypothetical protein                                      | 83.27 | 257 | Mv0037c | hypothetical protein                              | 83.27 | 257 | Mv0050  | hypothetical protein                              | 98.83 | 257 | BCG_0067c | hypothetical protein                              | 83.27 | 257 | MAP043c | hypothetical protein                     | 257 | 100   |
| MAP4_3833 | hypothetical protein                                                    | 107 | Rv0030  | hypothetical protein                                      | 80.56 | 109 | Mb0031  | hypothetical protein                              | 80.56 | 109 | Mv0049  | hypothetical protein                              | 100   | 107 | BCG_0061  | hypothetical protein                              | 80.56 | 109 | MAP042c | hypothetical protein                     | 107 | 100   |
| MAP4_3834 | hypothetical protein                                                    | 544 | Rv0029  | hypothetical protein                                      | 52.67 | 365 | Mv0029  | hypothetical protein                              | 52.67 | 365 | Mv0048  | hypothetical protein                              | 92.88 | 562 | BCG_0060  | hypothetical protein                              | 52.67 | 365 | MAP041c | hypothetical protein                     | 544 | 100   |
| MAP4_3835 | hypothetical protein                                                    | 107 | Rv0256c | hypothetical protein                                      | 37.93 | 358 | Mv0494c | hypothetical protein                              | 37.93 | 358 | Mv0047  | hypothetical protein                              | 100   | 107 | BCG_0076c | hypothetical protein                              | 37.93 | 358 | MAP243c | hypothetical protein                     | 876 | 48.65 |
| MAP4_3836 | hypothetical protein                                                    | 103 | Rv0028  | hypothetical protein                                      | 86    | 101 | Mv0029  | hypothetical protein                              | 86    | 101 | Mv0046  | hypothetical protein                              | 100   | 77  | BCG_0059c | hypothetical protein                              | 86    | 101 | MAP040c | hypothetical protein                     | 103 | 100   |
| MAP4_3837 | hypothetical protein                                                    | 105 | Rv0027  | hypothetical protein                                      | 73.33 | 105 | Mv0028  | hypothetical protein                              | 73.33 | 105 | Mv0045  | hypothetical protein                              | 100   | 105 | BCG_0058c | hypothetical protein                              | 73.33 | 105 | MAP039c | hypothetical protein                     | 105 | 100   |
| MAP4_3838 | hypothetical protein                                                    | 483 | Rv0026  | hypothetical protein                                      | 56.06 | 448 | Mb0027  | hypothetical protein                              | 57.26 | 477 | Mv0044  | hypothetical protein                              | 98.76 | 483 | BCG_0057c | hypothetical protein                              | 56.06 | 448 | MAP038c | hypothetical protein                     | 483 | 100   |
| MAP4_3839 | hypothetical protein                                                    | 120 | Rv0025  | hypothetical protein                                      | 58.33 | 120 | Mv0026  | hypothetical protein                              | 58.33 | 120 | Mv0043  | hypothetical protein                              | 98.17 | 120 | BCG_0056c | hypothetical protein                              | 58.33 | 120 | MAP037c | hypothetical protein                     | 120 | 100   |
| MAP4_3840 | putative secreted protein                                               | 274 | Rv0024  | Putative secreted protein P60-related                     | 68.35 | 281 | Mv0024  | hypothetical protein                              | 59.98 | 277 | Mv0042  | hypothetical protein                              | 99.64 | 275 | BCG_0054c | hypothetical protein                              | 68.35 | 281 | MAP036c | hypothetical protein                     | 274 | 100   |
| MAP4_3841 | transcriptional regulatory protein                                      | 762 | Rv0023  | Possible transcriptional regulatory protein               | 87.1  | 256 | Mv0023  | transcriptional regulator                         | 87.1  | 256 | Mv0041  | hypothetical protein                              | 98.09 | 262 | BCG_0053c | transcriptional regulatory protein                | 87.1  | 256 | MAP035c | hypothetical protein                     | 762 | 100   |
| MAP4_3842 | transposase, IS900                                                      | 406 | Rv0797  | Putative transposase for insertion site                   | 28.61 | 364 | Mb3360  | transposase                                       | 28.35 | 570 | Mv0059  | transposase                                       | 29.01 | 350 | BCG_3397  | transposase fusion protein                        | 28.35 | 570 | MAP034c | hypothetical protein                     | 406 | 100   |
| MAP4_3843 | transcriptional regulatory protein WhiB-like WhiB5                      | 138 | Rv0022c | Probable transcriptional regulatory protein               | 80.58 | 139 | Mb0022c | transcriptional regulator WhiB                    | 80.58 | 139 | Mv0040  | transcription factor WhiB family protein          | 99.29 | 138 | BCG_0052c | transcriptional regulatory protein                | 80.58 | 139 | MAP033c | hypothetical protein                     | 138 | 100   |
| MAP4_3844 | acyl-CoA dehydrogenase                                                  | 330 | Rv0216  | Probable acyl-CoA dehydrogenase F                         | 33.56 | 360 | Mv0216  | acyl-CoA dehydrogenase                            | 33.56 | 360 | Mv0038  | acyl-CoA dehydrogenase                            | 98.76 | 330 | BCG_0051c | acyl-CoA dehydrogenase                            | 33.56 | 360 | MAP032c | acyl-CoA dehydrogenase                   | 330 | 100   |
| MAP4_3845 | putative ribosomal protein-containing protein                           | 330 | Rv0216  | hypothetical protein                                      | 33.56 | 360 | Mv0216  | hypothetical protein                              | 33.56 | 360 | Mv0038  | acyl-CoA dehydrogenase                            | 98.76 | 330 | BCG_0051c | acyl-CoA dehydrogenase                            | 33.56 | 360 | MAP031c | hypothetical protein                     | 330 | 100   |
| MAP4_3846 | hypothetical protein                                                    | 109 | Rv3426c | ribosomal-protein-alanine acetyltransferase               | 50    | 158 | Mv3454c | ribosomal-protein-alanine acetyltransferase       | 50    | 158 | Mv0037  | hypothetical protein                              | 99.08 | 109 | BCG_3490c | ribosomal-protein-alanine acetyltransferase       | 50    | 158 | MAP030c | hypothetical protein                     | 109 | 100   |
| MAP4_3847 | conserved hypothetical protein (repetitive sequence of 100 amino acids) | 414 | Rv2014c | hypothetical protein                                      | 71.29 | 418 | Mv194c  | hypothetical protein                              | 71.29 | 418 | Mv0036  | hypothetical protein                              | 97.52 | 414 | BCG_2032c | hypothetical protein                              | 71.29 | 418 | MAP029c | hypothetical protein                     | 414 | 100   |
| MAP4_3848 | transposase, IS1311                                                     | 411 | Rv3640c | Probable transposase                                      | 60    | 409 | Mb3640c | transposase                                       | 60    | 409 | Mv0074  | transposase, Mutator family protein               | 99.76 | 425 | BCG_3698c | transposase                                       | 60    | 409 | MAP028c | hypothetical protein                     | 411 | 100   |
| MAP4_3849 | hypothetical protein                                                    | 62  | Rv0209  | hypothetical protein                                      | 59.23 | 62  | Mv0209  | hypothetical protein                              | 59.23 | 62  | Mv0035  | hypothetical protein                              | 98.67 | 62  | BCG_0050c | hypothetical protein                              | 59.23 | 62  | MAP027c | hypothetical protein                     | 62  | 100   |
| MAP4_3850 | putative fatty acyl-CoA ligase or polyketide synthase F                 | 518 | Rv1345  | Probable fatty acyl-CoA ligase MtnH                       | 59.62 | 521 | Mb1380  | long-chain-fatty-acyl-CoA ligase                  | 59.62 | 521 | Mv0030  | long-chain-fatty-acyl-CoA carrier                 | 97.68 | 518 | BCG_1407  | long-chain-fatty-acyl-CoA ligase                  | 59.62 | 521 | MAP026c | long-chain-fatty-acyl-CoA ligase         | 518 | 100   |
| MAP4_3851 | acyl carrier protein                                                    | 87  | Rv1344  | Acyl carrier protein (ACP) MbnL                           | 63.32 | 106 | Mv1379  | acyl carrier protein                              | 63.32 | 106 | Mv0029  | acyl carrier protein                              | 98.85 | 87  | BCG_1406  | acyl carrier protein                              | 63.32 | 106 | MAP025c | acyl carrier protein                     | 87  | 100   |
| MAP4_3852 | hypothetical protein                                                    | 221 | Rv0018c | Phosphoserine/threonine phosphatase                       | 36.84 | 514 | Mv0018c | serine/threonine phosphatase                      | 36.84 | 514 | Mv0028  | hypothetical protein                              | 88.62 | 247 | BCG_0048c | Serine/threonine phosphatase                      | 36.84 | 514 | MAP024c | hypothetical protein                     | 221 | 100   |
| MAP4_3853 | conserved hypothetical protein with FHA domain                          | 544 | Rv0020c | Conserved protein with FHA domain                         | 69.12 | 527 | Mb0020c | hypothetical protein                              | 67.86 | 521 | Mv0024  | hypothetical protein                              | 98.53 | 545 | BCG_0050c | hypothetical protein                              | 68.22 | 521 | MAP023c | hypothetical protein                     | 544 | 100   |
| MAP4_3854 | conserved hypothetical protein with FHA domain                          | 155 | Rv0019c | Conserved protein with FHA domain                         | 92.26 | 155 | Mv0019c | hypothetical protein                              | 92.26 | 155 | Mv0023  | hypothetical protein                              | 98.24 | 155 | BCG_0049c | hypothetical protein                              | 92.26 | 155 | MAP022c | hypothetical protein                     | 155 | 100   |
| MAP4_3855 | phosphoserine/threonine phosphatase Pgp                                 | 499 | Rv0018c | Phosphoserine/threonine phosphatase                       | 75.19 | 514 | Mv0018c | serine/threonine phosphatase                      | 75.12 | 514 | Mv0022  | hypothetical protein                              | 99.8  | 499 | BCG_0048c | Serine/threonine phosphatase                      | 75.19 | 514 | MAP021c | hypothetical protein                     | 499 | 100   |
| MAP4_3856 | cell division protein RodA                                              | 469 | Rv0017c | Probable cell division protein RodA                       | 85.07 | 469 | Mv0017c | cell division protein RodA                        | 85.07 | 469 | Mv0021  | cell cycle protein, FtsW/RodA/SpoA                | 99.57 | 469 | BCG_0047c | cell division protein RodA                        | 85.07 | 469 | MAP020c | RodA                                     | 469 | 100   |
| MAP4_3857 | penicillin-binding protein PbpA                                         | 492 | Rv0016c | Probable penicillin-binding protein PbpA                  | 87.8  | 491 | Mv0016c | penicillin-binding protein PbpA                   | 87.8  | 491 | Mv0020  | PbpA                                              | 100   | 492 | BCG_0046c | penicillin-binding protein PbpA                   | 87.8  | 491 | MAP019c | PbpA                                     | 492 | 100   |
| MAP4_3858 | transmembrane serine/threonine-protein kinase A PknA                    | 492 | Rv0015c | Transmembrane serine/threonine-protein kinase             | 85.75 | 431 | Mv0015c | Ser/Thr protein kinase                            | 85.75 | 431 | Mv0019  | Phenyl/threonine protein kinase                   | 99.76 | 421 | BCG_0045c | Ser/Thr protein kinase                            | 85.75 | 431 | MAP018c | hypothetical protein                     | 293 | 100   |
| MAP4_3859 | transmembrane serine/threonine-protein kinase B PknB                    | 426 | Rv0014c | Transmembrane serine/threonine-protein kinase             | 85.42 | 626 | Mv0014c | Ser/Thr protein kinase                            | 85.42 | 626 | Mv0018  | Serine/threonine protein kinase                   | 99.64 | 426 | BCG_0044c | Serine/threonine protein kinase                   | 85.42 | 626 | MAP017c | hypothetical protein                     | 426 | 100   |
| MAP4_3860 | intracellular synthase component II TrpG                                | 248 | Rv0013  | Possible anthranilate synthase component II               | 81.03 | 232 | Mv0013  | anthranilate synthase component II                | 81.07 | 232 | Mv0018  | anthranilate synthase component II                | 98.25 | 248 | BCG_0013  | para-aminobenzoate synthase                       | 81.03 | 232 | MAP015c | para-aminobenzoate synthase component II | 248 | 100   |
| MAP4_3861 | hypothetical protein                                                    | 277 | Rv0012  | Probable conserved membrane protein                       | 81.38 | 262 | Mv0012  | hypothetical protein                              | 81.38 | 262 | Mv0016  | hypothetical protein                              | 100   | 247 | BCG_0012  | hypothetical protein                              | 81.38 | 262 | MAP014c | hypothetical protein                     | 277 | 100   |
| MAP4_3862 | hypothetical protein                                                    | 93  | Rv0011c | Probable conserved transmembrane protein                  | 95.7  | 93  | Mv0011c | separation inhibitor protein                      | 95.7  | 93  | Mv0015  | separation inhibitor protein                      | 100   | 93  | BCG_0011c | separation inhibitor protein                      | 95.7  | 93  | MAP013c | separation inhibitor protein             | 93  | 100   |
| MAP4_3863 | hypothetical protein                                                    | 141 | Rv0010c | Probable conserved membrane protein                       | 70.64 | 111 | Mv0010c | hypothetical protein                              | 70.64 | 111 | Mv0014  | hypothetical protein                              | 95.7  | 93  | BCG_0010c | separation inhibitor protein                      | 70.64 | 111 | MAP012c | hypothetical protein                     | 141 | 100   |
| MAP4_3864 | non-regulated peptidyl-prolyl cis-transisomerase PpaA                   | 182 | Rv0009  | Probable non-regulated peptidyl-prolyl cis-transisomerase | 89.56 | 182 | Mv0009  | non-regulated peptidyl-prolyl cis-trans isomerase | 89.56 | 182 | Mv0013  | non-regulated peptidyl-prolyl cis-trans isomerase | 99.86 | 176 | BCG_0009c | non-regulated peptidyl-prolyl cis-trans isomerase | 89.56 | 182 | MAP011c | PpaA                                     | 182 | 100   |
| MAP4_3865 | hypothetical protein                                                    | 144 | Rv0008c | Possible membrane protein                                 | 66.94 | 144 | M       |                                                   |       |     |         |                                                   |       |     |           |                                                   |       |     |         |                                          |     |       |



## Table S1 continued

|           |                                                        |       |         |                                           |       |      |         |                                   |       |      |        |                                     |       |      |           |                                       |       |      |          |                                      |       |       |
|-----------|--------------------------------------------------------|-------|---------|-------------------------------------------|-------|------|---------|-----------------------------------|-------|------|--------|-------------------------------------|-------|------|-----------|---------------------------------------|-------|------|----------|--------------------------------------|-------|-------|
| MAP4_3911 | hypothetical protein                                   | 101   | Rv0552  | hypothetical protein                      | 28.17 | 534  | Mv0567  | hypothetical protein              | 28.17 | 534  | Mv4842 | hypothetical protein                | 100   | 101  | BCG_0597  | hypothetical protein                  | 28.17 | 534  | MAP2524c | hypothetical protein                 | 309   | 34.43 |
| MAP4_3918 | hypothetical protein                                   | 224   | Rv3481c | Probable integral membrane protein        | 61.64 | 229  | Mb0351c | hypothetical protein              | 61.64 | 229  | Mv4831 | hypothetical protein                | 97.7  | 217  | BCG_3545c | integral membrane protein             | 61.64 | 229  | MAP3906  | hypothetical protein                 | 224   | 100   |
| MAP4_3919 | hypothetical protein                                   | 229   | Rv3482c | Probable integral membrane protein        | 65.25 | 229  | Mb0352c | hypothetical protein              | 65.25 | 229  | Mv4832 | hypothetical protein                | 99.57 | 219  | BCG_3546c | integral membrane protein             | 65.25 | 229  | MAP3907  | hypothetical protein                 | 229   | 100   |
| MAP4_3920 | hypothetical protein                                   | 260   | Rv1322c | Two component sensor histidine kin        | 32.08 | 578  | Mb1352c | hypothetical protein              | 32.08 | 578  | Mv4830 | hypothetical protein                | 99.62 | 260  | BCG_3155c | two component sensor histidine kinase | 32.08 | 578  | MAP3908c | hypothetical protein                 | 260   | 100   |
| MAP4_3921 | mannitol dehydrogenase                                 | 467   | Rv1709  | Possible segregation and condensate       | 27.34 | 278  | Mb1736  | hypothetical protein              | 27.34 | 278  | Mv4838 | mannitol 2-dehydrogenase            | 99.79 | 467  | BCG_1748  | hypothetical protein                  | 27.34 | 278  | MAP3909c | hypothetical protein                 | 467   | 100   |
| MAP4_3922 | hypothetical protein                                   | 144   | Rv1240c | Conserved protein TB18.6                  | 35.48 | 176  | Mb1640c | hypothetical protein              | 35.48 | 176  | Mv4837 | hypothetical protein                | 98.98 | 98   | BCG_2157c | hypothetical protein                  | 35.48 | 176  | MAP310c  | hypothetical protein                 | 144   | 100   |
| MAP4_3923 | hypothetical protein                                   | 183   | Rv1435c | Probable conserved proline, glycine       | 55.14 | 202  | Mb1470c | proline, glycine, valine-rich seq | 55.14 | 209  | Mv4835 | hypothetical protein                | 99.44 | 180  | BCG_1499c | hypothetical protein                  | 55.14 | 209  | MAP311c  | hypothetical protein                 | 183   | 100   |
| MAP4_3924 | conserved exported protein                             | 74.91 | Rv1433  | Probable conserved exported protein       | 74.91 | 271  | Mb1468  | hypothetical protein              | 74.91 | 271  | Mv4834 | hypothetical protein                | 98.03 | 254  | BCG_1498  | hypothetical protein                  | 74.91 | 271  | MAP312c  | hypothetical protein                 | 74.91 | 99.83 |
| MAP4_3925 | hypothetical protein                                   | 111   | Rv0611c | hypothetical protein                      | 40.32 | 127  | Mb0626c | hypothetical protein              | 40.32 | 127  | Mv4833 | hypothetical protein                | 97.1  | 49   | BCG_0658c | hypothetical protein                  | 40.32 | 127  | MAP313c  | hypothetical protein                 | 111   | 100   |
| MAP4_3926 | putative transposase                                   | 493   | Rv3845  | hypothetical protein                      | 47.37 | 119  | Mb3875  | hypothetical protein              | 47.37 | 119  | Mv4836 | transposase 5116/5110/5902          | 28.24 | 404  | BCG_3908  | hypothetical protein                  | 47.37 | 119  | MAP314c  | hypothetical protein                 | 493   | 100   |
| MAP4_3927 | hypothetical protein                                   | 218   | Rv1380  | Probable aspartate carboxyltransferase    | 28.57 | 319  | Mb1415  | aspartate carboxyltransferase     | 28.57 | 319  | Mv4133 | hypothetical protein                | 28.42 | 353  | BCG_1441  | aspartate carboxyltransferase         | 28.57 | 319  | MAP315c  | hypothetical protein                 | 218   | 100   |
| MAP4_3928 | hypothetical protein                                   | 284   | Rv0860  | Probable fatty acyl-coenzyme A synthetase | 46.81 | 720  | Mb0863  | fatty acyl-coenzyme A synthetase  | 46.81 | 720  | Mv4866 | hypothetical protein                | 58.2  | 208  | BCG_0912  | fatty acyl-coenzyme A synthetase      | 46.81 | 720  | MAP3649  | long-chain-fatty-acyl-CoA ligase     | 505   | 29.27 |
| MAP4_3929 | putative phage integrase family protein                | 40    | Rv3751  | Probable integrase (fragment)             | 37.21 | 71   | Mb3772  | integrase (fragment)              | 37.21 | 71   | Mv4865 | hypothetical protein                | 33.33 | 402  | BCG_3810  | integrase                             | 37.21 | 71   | MAP3816  | hypothetical protein                 | 40    | 100   |
| MAP4_3930 | hypothetical protein                                   | 33    | Rv1604  | hypothetical protein                      | 33.33 | 211  | Mb0755  | hypothetical protein              | 33.33 | 211  | Mv4864 | 3-hydroxyisobutyrate dehydrogenase  | 31.92 | 252  | BCG_0952  | integral membrane protein             | 33.33 | 211  | MAP3822  | hypothetical protein                 | 33    | 100   |
| MAP4_3931 | putative cytochrome P450 family protein                | 60    | Rv2266  | Probable cytochrome P450 124 Cyp          | 39.49 | 428  | Mb2289  | cytochrome P450 124 CYP124        | 39.49 | 428  | Mv4174 | P450-heme-thiolate protein          | 41.92 | 435  | BCG_2283  | cytochrome P450 124 CYP124            | 39.49 | 428  | MAP3818  | hypothetical protein                 | 432   | 100   |
| MAP4_3932 | hypothetical protein                                   | 214   | Rv0320  | Possible conserved exported protein       | 63.64 | 220  | Mb0328  | hypothetical protein              | 63.64 | 220  | Mv4829 | hypothetical protein                | 99.34 | 152  | BCG_0360  | hypothetical protein                  | 63.64 | 220  | MAP3819  | hypothetical protein                 | 211   | 99.53 |
| MAP4_3933 | deoxyxylidine triphosphate deaminase Dcd               | 190   | Rv0321  | Possible deoxyxylidine triphosphate       | 92.11 | 190  | Mb0329  | deoxyxylidine triphosphate d      | 91.58 | 190  | Mv4828 | deoxyxylidine triphosphate deamin   | 99.47 | 190  | BCG_0361  | deoxyxylidine triphosphate de         | 92.11 | 190  | MAP3820  | deoxyxylidine triphosphate deaminase | 190   | 100   |
| MAP4_3934 | hypothetical protein                                   | 69    | Rv1887  | hypothetical protein                      | 29.35 | 380  | Mb1919  | hypothetical protein              | 29.35 | 380  | Mv4827 | hypothetical protein                | 99.21 | 644  | BCG_1924  | hypothetical protein                  | 29.35 | 380  | MAP3821  | hypothetical protein                 | 69    | 100   |
| MAP4_3935 | hypothetical protein                                   | 510   | Rv1887  | hypothetical protein                      | 30.61 | 380  | Mb1919  | hypothetical protein              | 30.61 | 380  | Mv4826 | hypothetical protein                | 99.2  | 480  | BCG_1924  | hypothetical protein                  | 30.61 | 380  | MAP3822  | hypothetical protein                 | 510   | 100   |
| MAP4_3936 | hypothetical protein                                   | 40    | Rv1887  | hypothetical protein                      | 30.5  | 380  | Mb1919  | hypothetical protein              | 30.5  | 380  | Mv4825 | hypothetical protein                | 98.66 | 372  | BCG_1924  | hypothetical protein                  | 30.5  | 380  | MAP3823  | hypothetical protein                 | 40    | 100   |
| MAP4_3937 | hypothetical protein                                   | 448   | Rv1887  | hypothetical protein                      | 29.17 | 380  | Mb1919  | hypothetical protein              | 29.17 | 380  | Mv4824 | hypothetical protein                | 100   | 482  | BCG_1924  | hypothetical protein                  | 29.17 | 380  | MAP3824  | hypothetical protein                 | 448   | 100   |
| MAP4_3938 | UDP-glucose 6-dehydrogenase UdgA                       | 448   | Rv0322  | Probable UDP-glucose 6-dehydrogen         | 88.64 | 443  | Mb0330  | UDP-glucose 6-dehydrogenase       | 88.64 | 443  | Mv4823 | UDP-glucose 6-dehydrogenase         | 99.31 | 437  | BCG_0362  | UDP-glucose 6-dehydrogenase           | 88.64 | 443  | MAP3825  | UdgA                                 | 448   | 100   |
| MAP4_3939 | hypothetical protein                                   | 274   | Rv0332  | hypothetical protein                      | 72.55 | 261  | Mb0339  | hypothetical protein              | 72.55 | 261  | Mv4822 | hypothetical protein                | 98.48 | 264  | BCG_0371  | hypothetical protein                  | 72.55 | 261  | MAP3826  | hypothetical protein                 | 274   | 100   |
| MAP4_3940 | hypothetical protein                                   | 116   | Rv0333  | hypothetical protein                      | 73.33 | 124  | Mb0340  | hypothetical protein              | 73.33 | 124  | Mv4821 | hypothetical protein                | 98.61 | 124  | BCG_0372  | hypothetical protein                  | 73.33 | 124  | MAP3827  | hypothetical protein                 | 116   | 100   |
| MAP4_3941 | glucose-1-phosphate thymidyltransferase RfmA           | 291   | Rv0334  | Alpha-D-glucose-1-phosphate thymi         | 83.68 | 288  | Mb0341  | glucose-1-phosphate thymidyl      | 83.68 | 288  | Mv4820 | glucose-1-phosphate thymidyltr      | 100   | 291  | BCG_0373  | glucose-1-phosphate thymidyl          | 83.68 | 288  | MAP3828  | RfmA                                 | 291   | 100   |
| MAP4_3942 | putative membrane protein, Y8E-like protein family     | 424   | Rv2051c | Polyprenyl-monophosphomannose             | 31.48 | 874  | Mb2077c | polyprenyl-monophosphomann        | 31.48 | 874  | Mv4819 | hypothetical protein                | 98.81 | 421  | BCG_2070c | polyprenyl-monophosphomann            | 31.48 | 874  | MAP3829c | hypothetical protein                 | 424   | 100   |
| MAP4_3943 | aspartate aminotransferase AspC                        | 430   | Rv0337c | Probable aspartate aminotransferase       | 92.56 | 429  | Mb0334c | aminotransferase                  | 92.56 | 429  | Mv4818 | aminotransferase AlaT               | 99.29 | 414  | BCG_0376c | aminotransferase                      | 92.56 | 429  | MAP3830c | aminotransferase AlaT                | 430   | 100   |
| MAP4_3944 | non-sulfur binding reductase                           | 959   | Rv0336c | Probable non-sulfur-binding reductase     | 80.07 | 892  | Mb0335c | non-sulfur-binding reductase      | 80.07 | 892  | Mv4817 | ferredoxin 4Fe-4S                   | 97.5  | 395  | BCG_2281c | non-sulfur-binding reductase          | 80.07 | 892  | MAP3831c | hypothetical protein                 | 959   | 100   |
| MAP4_3945 | putative heat shock protein, hsp70 family              | 35    | Rv254c  | Conserved hypothetical protein rich       | 37.33 | 59   | Mb2875c | hypothetical protein              | 37.33 | 59   | Mv4816 | hypothetical protein                | 96.56 | 97.9 | 565       | 97.9                                  | 565   | 97.9 | 565      | 97.9                                 | 565   | 98.55 |
| MAP4_3946 | putative heat shock protein, hsp70 family              | 35    | Rv254c  | Conserved hypothetical protein rich       | 37.33 | 59   | Mb2875c | hypothetical protein              | 37.33 | 59   | Mv4816 | hypothetical protein                | 96.56 | 97.9 | 565       | 97.9                                  | 565   | 97.9 | 565      | 97.9                                 | 565   | 98.55 |
| MAP4_3947 | putative metabolite/sugar transport protein            | 476   | Rv3311  | Probable sugar-transport integral mem     | 30.84 | 502  | Mb3364  | sugar-transport integral mem      | 31.06 | 502  | Mv4814 | metabolite/sugar transport protein  | 99.33 | 449  | BCG_3401  | sugar-transport integral mem          | 30.84 | 499  | MAP3834  | hypothetical protein                 | 476   | 100   |
| MAP4_3948 | hypothetical protein                                   | 275   | Rv3311  | Probable sugar-transport integral mem     | 30.84 | 502  | Mb3364  | sugar-transport integral mem      | 31.06 | 502  | Mv4814 | metabolite/sugar transport protein  | 99.33 | 449  | BCG_3401  | sugar-transport integral mem          | 30.84 | 499  | MAP3835c | hypothetical protein                 | 275   | 100   |
| MAP4_3949 | hypothetical protein                                   | 717   | Rv2079  | hypothetical protein                      | 53.3  | 656  | Mb2105  | hypothetical protein              | 53.3  | 656  | Mv4813 | hypothetical protein                | 52.88 | 206  | BCG_2098  | hypothetical protein                  | 53.3  | 656  | MAP3836c | hypothetical protein                 | 717   | 100   |
| MAP4_3950 | lipoprotein                                            | 114   | Rv344c  | Probable lipoprotein LpgI                 | 74.55 | 186  | Mb3531c | hypothetical protein LpgI         | 74.55 | 186  | Mv4811 | hypothetical protein                | 98.97 | 144  | BCG_0383c | lipoprotein lpgI                      | 74.55 | 186  | MAP3837c | hypothetical protein                 | 114   | 99.48 |
| MAP4_3951 | conserved hypothetical protein, (RE5) domain-containi  | 29.9  | Rv1635c | Probable mannosyltransferase Prob         | 29.9  | 556  | Mv1661c | hypothetical protein              | 29.9  | 556  | Mv4810 | hypothetical protein                | 99.53 | 220  | BCG_1673c | hypothetical protein                  | 29.9  | 556  | MAP3838c | hypothetical protein                 | 29.9  | 100   |
| MAP4_3952 | hypothetical protein                                   | 199   | Rv2897c | hypothetical protein                      | 45.45 | 503  | Mb2921c | hypothetical protein              | 45.45 | 503  | Mv4809 | hypothetical protein                | 98.99 | 199  | BCG_2918c | hypothetical protein                  | 45.45 | 503  | MAP3839c | hypothetical protein                 | 201   | 100   |
| MAP4_3953 | chaperone protein DnaK                                 | 623   | Rv0350  | Probable chaperone protein DnaK II        | 92.64 | 625  | Mb0358  | molecular chaperone DnaK          | 92.64 | 625  | Mv4808 | molecular chaperone DnaK            | 99.84 | 623  | BCG_0389  | molecular chaperone DnaK              | 92.64 | 625  | MAP3840  | molecular chaperone DnaK             | 623   | 100   |
| MAP4_3954 | heat shock protein GrpE                                | 227   | Rv0351  | Probable heat shock protein GrpE          | 84.57 | 235  | Mb0359  | heat shock protein GrpE           | 84.57 | 235  | Mv4807 | heat shock protein GrpE             | 99.56 | 227  | BCG_0390  | heat shock protein GrpE               | 84.57 | 235  | MAP3841  | heat shock protein GrpE              | 227   | 100   |
| MAP4_3955 | chaperone protein DnaJ                                 | 392   | Rv0352  | Probable chaperone protein DnaJ           | 81.15 | 395  | Mb0360  | molecular chaperone DnaJ          | 81.15 | 395  | Mv4806 | chaperone protein DnaJ              | 100   | 392  | BCG_0392  | chaperone protein DnaJ                | 81.15 | 395  | MAP3842  | chaperone DnaJ                       | 392   | 100   |
| MAP4_3956 | merf-family heat shock protein transcriptional repress | 131   | Rv0353  | Probable heat shock protein transcr       | 81.75 | 126  | Mb0361  | HEAT shock protein DnaK           | 81.75 | 126  | Mv4805 | Merf family transcriptional regulat | 99.24 | 131  | BCG_0392  | heat shock protein transcripto        | 81.75 | 126  | MAP3843  | HspR                                 | 131   | 100   |
| MAP4_3957 | putative ATPase associated adenylateguanylate cyclase  | 1245  | Rv3645  | Probable conserved transmembrane          | 30.46 | 549  | Mb3669  | transmembrane protein             | 30.46 | 549  | Mv4804 | GAF domain-containing protein       | 99.09 | 1432 | BCG_0703  | hypothetical protein                  | 30.46 | 549  | MAP3844  | hypothetical protein                 | 1245  | 100   |
| MAP4_3958 | hypothetical protein                                   | 1428  | Rv0425c | Possible metal cation transporting P-ty   | 35.14 | 1539 | Mb0433c | metal cation transporting P-ty    | 35.14 | 1539 | Mv4803 | hypothetical protein                | 97.28 | 257  | BCG_0443c | metal cation transporting P-ty        | 35.14 | 1539 | MAP3845  | hypothetical protein                 | 1428  | 100   |
| MAP4_3959 | multifunctional geranylgeranyl pyrophosphate synthet   | 32.96 | Rv0331c | Probable multifunctional dimethylallyl    | 32.96 | 359  | Mb0331c | multifunctional dimethylallyl     | 32.96 | 359  | Mv4802 | isoprenyl synthetase                | 98.99 | 395  | BCG_2450c | multifunctional geranylgeranyl        | 32.96 | 359  | MAP3846  | AAA                                  | 32.96 | 99.81 |
| MAP4_3960 | hypothetical protein                                   | 152   | Rv2431c | PE family protein PE23                    | 34.55 | 99   | Mb2457c | PE family protein                 | 34.55 | 99   | Mv4801 | hypothetical protein                | 98.38 | 152  | BCG_2450c | PE family protein                     | 34.55 | 99   | MAP3847  | hypothetical protein                 | 152   | 44.44 |
| MAP4_3961 | hypothetical protein                                   | 89    | Rv3245c | Two component sensory transduc            | 42.5  | 567  | Mb3273c | two component sensory trans       | 42.5  | 567  | Mv4800 | hypothetical protein                | 94.38 | 89   | BCG_3274c | two component sensory trans           | 42.5  | 567  | MAP3848  | hypothetical protein                 | 89    | 100   |
| MAP4_3962 | hypothetical protein                                   | 140   | Rv2220  | Glutamine synthetase GlnA1                | 35.19 | 478  | Mb2244  | glutamine synthetase              | 35.19 | 478  | Mv4799 | hypothetical protein                | 98.82 | 340  | BCG_2237  | glutamine synthetase GlnA1            | 35.19 | 478  | MAP3848  | hypothetical protein                 | 143   | 99.71 |
| MAP4_3963 | hypothetical protein                                   | 133   | Rv0322  | Probable UDP-glucose 6-dehydrogen         | 48.39 | 443  | Mb0330  | UDP-glucose 6-dehydrogenase       | 48.39 | 443  | Mv4798 | hypothetical protein                | 96.24 | 133  | BCG_0362  | UDP-glucose 6-dehydrogenase           | 48.39 | 443  | MAP2478  | hypothetical protein                 | 133   | 40    |
| MAP4_3964 | hypothetical protein                                   | 602   | Rv0327  | Possible oxidoreductase                   | 32.96 | 602  | Mb0327  | oxidoreductase                    | 32.96 | 602  | Mv4797 | hypothetical protein                | 98.79 | 602  | BCG_0426  | hypothetical protein                  | 602   | 602  | MAP3849  | hypothetical protein                 | 602   | 100   |
| MAP4_3965 | putative class I 1-epimerase family protein            | 300   | Rv0     |                                           |       |      |         |                                   |       |      |        |                                     |       |      |           |                                       |       |      |          |                                      |       |       |

Table S1 continued

|           |                                                      |     |         |                                       |       |     |          |                                     |       |     |          |                                     |       |     |           |                                     |       |     |          |                                     |     |       |
|-----------|------------------------------------------------------|-----|---------|---------------------------------------|-------|-----|----------|-------------------------------------|-------|-----|----------|-------------------------------------|-------|-----|-----------|-------------------------------------|-------|-----|----------|-------------------------------------|-----|-------|
| MAP4_4014 | putative sulfur carrier protein THS                  | 65  | Rv0416  | Possible protein THS                  | 69.12 | 68  | MB0424   | sulfur carrier protein THS          | 69.12 | 68  | MV_4745  | sulfur carrier protein THS          | 100   | 65  | BCG_0455  | sulfur carrier protein THS          | 69.12 | 68  | MAP3899  | sulfur carrier protein THS          | 65  | 100   |
| MAP4_4015 | thiamin biosynthesis protein THG                     | 252 | Rv0417  | Possible thiamin biosynthesis prote   | 91.27 | 252 | MB0425   | thiazole synthase                   | 91.67 | 252 | MV_4744  | thiazole synthase                   | 99.6  | 252 | BCG_0456  | thiazole synthase                   | 91.67 | 252 | MAP3900  | thiazole synthase                   | 252 | 100   |
| MAP4_4016 | putative thiopyruvate synthase                       | 245 | Rv0420  | Possible thiopyruvate synthase        | 39.53 | 245 | MB0426   | thiopyruvate synthase               | 39.53 | 245 | MV_4743  | thiopyruvate synthase               | 98.82 | 245 | BCG_0457  | thiopyruvate synthase               | 39.53 | 245 | MAP3901  | thiopyruvate synthase               | 245 | 100   |
| MAP4_4017 | putative CTP synthase PyrG                           | 173 | Rv0409  | Possible CTP synthase                 | 30    | 173 | MB1725   | CTP synthase                        | 30    | 173 | MV_4742  | CTP synthase                        | 98.84 | 173 | BCG_1737  | CTP synthase                        | 30    | 173 | MAP3902  | CTP synthase                        | 173 | 100   |
| MAP4_4018 | hypothetical protein                                 | 176 | Rv0929  | Phosphate-transport integral mem      | 33.96 | 324 | MB0952   | phosphate ABC transporter t         | 33.96 | 324 | MV_4741  | hypothetical protein                | 97.16 | 176 | BCG_0981  | phosphate-transport integral        | 33.96 | 324 | MAP3903  | hypothetical protein                | 177 | 100   |
| MAP4_4019 | putative interferon-induced transmembrane protein    | 110 | Rv0436  | Probable conserved transmembrane p    | 27.5  | 492 | MB0211   | transmembrane protein               | 33.33 | 367 | MV_4740  | hypothetical protein                | 99.09 | 110 | BCG_0242  | hypothetical protein                | 33.33 | 367 | MAP3904  | hypothetical protein                | 110 | 100   |
| MAP4_4020 | hypothetical protein                                 | 141 | Rv0416  | Possible protein                      | 32.41 | 132 | MB0443   | hypothetical protein                | 32.41 | 132 | MV_4739  | hypothetical protein                | 100   | 141 | BCG_1654  | hypothetical protein                | 32.41 | 132 | MAP3905  | hypothetical protein                | 141 | 100   |
| MAP4_4021 | probable lipoprotein aminopeptidase Lpt              | 490 | Rv0418  | Probable lipoprotein aminopeptidase   | 80.36 | 500 | MB0426   | lipoprotein aminopeptidase          | 80.36 | 500 | MV_4738  | hypothetical protein                | 99.14 | 490 | BCG_0457  | lipoprotein aminopeptidase          | 80.36 | 500 | MAP3906  | hypothetical protein                | 490 | 99.8  |
| MAP4_4022 | putative lipoprotein aminopeptidase Lpt              | 490 | Rv0418  | Probable lipoprotein aminopeptidase   | 50.87 | 500 | MB0426   | lipoprotein aminopeptidase          | 50.87 | 500 | MV_4737  | lipoprotein A28 family protein      | 99.18 | 490 | BCG_0457  | lipoprotein aminopeptidase          | 50.87 | 500 | MAP3907  | lipoprotein aminopeptidase          | 477 | 99.79 |
| MAP4_4023 | lipoprotein peptidase LptM                           | 481 | Rv0419  | Possible lipoprotein peptidase LptM   | 76.94 | 498 | MB0427   | lipoprotein peptidase LptM          | 76.94 | 498 | MV_4736  | LptM protein                        | 99.18 | 481 | BCG_0458  | lipoprotein peptidase lptM          | 76.94 | 498 | MAP3908  | hypothetical protein                | 481 | 100   |
| MAP4_4024 | monooxygenase                                        | 291 | Rv1855x | Possible oxidoreductase               | 40.86 | 307 | MB1856x  | oxidoreductase                      | 40.86 | 307 | MV_4735  | hypothetical protein                | 96.56 | 291 | BCG_1891c | oxidoreductase                      | 40.86 | 307 | MAP3909x | hypothetical protein                | 291 | 100   |
| MAP4_4025 | transcriptional regulator, MarR family               | 144 | Rv0880  | Possible transcriptional regulator p  | 34.29 | 143 | MB0904   | MarR family transcriptional regul   | 34.29 | 143 | MV_4734  | MarR family transcriptional regulat | 99.31 | 144 | BCG_0932  | MarR family transcriptional regul   | 34.29 | 143 | MAP3910  | hypothetical protein                | 111 | 99.1  |
| MAP4_4026 | hypothetical protein                                 | 207 | Rv0421x | hypothetical protein                  | 80.3  | 209 | MB0429x  | hypothetical protein                | 80.3  | 209 | MV_4733  | hypothetical protein                | 99.52 | 207 | BCG_0456x | hypothetical protein                | 80.3  | 209 | MAP3911x | hypothetical protein                | 207 | 100   |
| MAP4_4027 | phosphoenolpyruvate carboxylase ThcD                 | 282 | Rv0422x | Probable phosphoenolpyruvate kinase   | 86.74 | 285 | MB0430x  | phosphoenolpyruvate kinase          | 86.74 | 285 | MV_4732  | hypothetical protein                | 98.58 | 282 | BCG_0461x | phosphoenolpyruvate kinase          | 86.74 | 285 | MAP3912x | phosphoenolpyruvate kinase          | 282 | 100   |
| MAP4_4028 | thiamin biosynthesis protein THG                     | 252 | Rv0423x | Probable thiamin biosynthesis prote   | 90.69 | 547 | MB0431x  | thiamine biosynthesis protein       | 90.69 | 547 | MV_4731  | thiamine biosynthesis protein THG   | 99.81 | 540 | BCG_0462x | thiamine biosynthesis protein THG   | 90.69 | 547 | MAP3913x | thiamine biosynthesis protein THG   | 540 | 100   |
| MAP4_4029 | hypothetical protein                                 | 92  | Rv0424x | hypothetical protein                  | 80    | 91  | MV_4730x | hypothetical protein                | 80    | 91  | MV_4730x | hypothetical protein                | 100   | 92  | BCG_0463x | hypothetical protein                | 80    | 91  | MAP3914x | hypothetical protein                | 92  | 100   |
| MAP4_4030 | hypothetical protein                                 | 64  | Rv1535  | hypothetical protein                  | 58.82 | 78  | MB1562   | hypothetical protein                | 58.82 | 78  | MV_4729  | hypothetical protein                | 96.88 | 64  | BCG_1587  | hypothetical protein                | 58.82 | 78  | MAP1245  | hypothetical protein                | 78  | 57.58 |
| MAP4_4031 | putative transmembrane protein                       | 149 | Rv0426x | Possible transmembrane protein        | 62.42 | 147 | MB0434x  | transmembrane protein               | 62.42 | 147 | MV_4728  | hypothetical protein                | 99.28 | 139 | BCG_0465x | hypothetical protein                | 62.42 | 147 | MAP3915x | hypothetical protein                | 149 | 100   |
| MAP4_4032 | exodeoxyribonuclease III Xba                         | 277 | Rv0427x | Probable exodeoxyribonuclease III p   | 83.4  | 291 | MB0435x  | exodeoxyribonuclease III            | 83.4  | 291 | MV_4727  | hypothetical protein                | 98.8  | 277 | BCG_0466x | exodeoxyribonuclease III protein    | 83.4  | 291 | MAP3916x | hypothetical protein                | 277 | 100   |
| MAP4_4033 | hypothetical protein                                 | 265 | Rv0428x | GCN5-related N-acetyltransferase II   | 54.58 | 302 | MB0436x  | hypothetical protein                | 54.58 | 302 | MV_4726  | hypothetical protein                | 94.01 | 267 | BCG_0467x | hypothetical protein                | 54.58 | 302 | MAP3917x | hypothetical protein                | 249 | 100   |
| MAP4_4034 | peptide deformylase Def                              | 197 | Rv0429x | Probable polypeptide deformylase T    | 87.31 | 197 | MB0437x  | peptide deformylase                 | 86.8  | 197 | MV_4725  | peptide deformylase                 | 97.74 | 177 | BCG_0468x | peptide deformylase                 | 87.31 | 197 | MAP3918x | peptide deformylase                 | 197 | 99.49 |
| MAP4_4035 | hypothetical protein                                 | 102 | Rv0430  | hypothetical protein                  | 97.06 | 102 | MB0438   | hypothetical protein                | 97.06 | 102 | MV_4724  | hypothetical protein                | 100   | 102 | BCG_0469  | hypothetical protein                | 97.06 | 102 | MAP3919  | hypothetical protein                | 102 | 100   |
| MAP4_4036 | putative tuberculin related peptide                  | 158 | Rv0431  | Putative tuberculin related peptide   | 66.46 | 164 | MB0439   | tuberculin-like protein             | 67.09 | 164 | MV_4723  | hypothetical protein                | 99.3  | 143 | BCG_0470  | tuberculin-like protein             | 67.09 | 164 | MAP3920  | putative tuberculin related peptide | 158 | 100   |
| MAP4_4037 | periplasmic superoxide dismutase SodC                | 227 | Rv0432  | Periplasmic superoxide dismutase      | 72.89 | 240 | MB0440   | periplasmic superoxide dismut       | 72.89 | 240 | MV_4722  | superoxide dismutase, Cu-Zn         | 99.56 | 227 | BCG_0471  | periplasmic superoxide dismut       | 72.89 | 240 | MAP3921  | SodC                                | 227 | 100   |
| MAP4_4038 | carboxylate-amine ligase                             | 376 | Rv0433  | carboxylate-amine ligase              | 87.23 | 376 | MB0441   | carboxylate-amine ligase            | 87.23 | 376 | MV_4721  | carboxylate-amine ligase            | 99.73 | 379 | BCG_0472  | carboxylate-amine ligase            | 87.23 | 376 | MAP3922  | carboxylate-amine ligase            | 378 | 99.73 |
| MAP4_4039 | ATP-dependent protease La domain family protein      | 213 | Rv0434  | hypothetical protein                  | 66.51 | 217 | MB0442   | hypothetical protein                | 66.58 | 217 | MV_4720  | ATP-dependent protease La           | 99.06 | 213 | BCG_0473  | hypothetical protein                | 66.58 | 217 | MAP3923  | hypothetical protein                | 213 | 100   |
| MAP4_4040 | oxidoreductase                                       | 144 | Rv1360  | Possible oxidoreductase               | 46.23 | 340 | MB1395   | oxidoreductase                      | 46.23 | 340 | MV_4719  | hypothetical protein                | 98.53 | 340 | BCG_1422  | oxidoreductase                      | 46.23 | 340 | MAP3924  | hypothetical protein                | 340 | 100   |
| MAP4_4041 | putative enoyl-CoA hydratase                         | 278 | Rv1707x | Putative enoyl-CoA hydratase          | 37.84 | 278 | MB1707x  | enoyl-CoA hydratase                 | 37.84 | 278 | MV_4718  | enoyl-CoA hydratase/isomerase       | 99.56 | 278 | BCG_0474  | enoyl-CoA hydratase                 | 37.84 | 278 | MAP3925  | putative enoyl-CoA hydratase        | 278 | 100   |
| MAP4_4042 | hypothetical protein                                 | 192 | Rv1675x | hypothetical protein                  | 31.03 | 310 | MB1700x  | hypothetical protein                | 31.03 | 310 | MV_4718  | hypothetical protein                | 99.25 | 192 | BCG_1711x | hypothetical protein                | 31.03 | 310 | MAP3926x | hypothetical protein                | 260 | 200   |
| MAP4_4043 | hypothetical protein, TetR family                    | 188 | Rv0359  | Possible transcriptional regulatory p | 35.59 | 210 | MB0310   | TetR/ACR family transcript          | 35.59 | 210 | MV_4715  | TetR family transcriptional regulat | 99.87 | 188 | BCG_0342  | TetR family transcriptional regul   | 35.59 | 210 | MAP3927  | hypothetical protein                | 198 | 100   |
| MAP4_4044 | ATPase                                               | 722 | Rv0435x | Putative conserved ATPase             | 85.69 | 728 | MB0443x  | ATPase                              | 85.69 | 728 | MV_4714  | ATP-dependent protease              | 99.45 | 722 | BCG_0474x | atpase                              | 85.69 | 728 | MAP3928x | hypothetical protein                | 722 | 100   |
| MAP4_4045 | CDP-diacylglycerol-serine-phosphatidyl transferase P | 787 | Rv0436x | Probable CDP-diacylglycerol-serine    | 81.82 | 788 | MB0444x  | CDP-diacylglycerol-serine O-phos    | 81.82 | 788 | MV_4714  | CDP-diacylglycerol-serine O-phos    | 100   | 787 | BCG_0475x | CDP-diacylglycerol-serine o-ph      | 81.82 | 788 | MAP3929x | hypothetical protein                | 787 | 100   |
| MAP4_4046 | polyhydroxybutyrate decarboxylase                    | 241 | Rv0437x | Probable polyhydroxybutyrate decarbox | 79.41 | 241 | MB0445x  | polyhydroxybutyrate decarboxyl      | 79.41 | 241 | MV_4713  | polyhydroxybutyrate decarboxylat    | 99.86 | 241 | BCG_0476x | polyhydroxybutyrate decarboxyl      | 79.41 | 241 | MAP3930x | polyhydroxybutyrate decarboxylase   | 241 | 100   |
| MAP4_4047 | transport, major facilitator superfamily protein     | 412 | Rv1674x | Probable transcriptional regulatory p | 80.54 | 412 | MB1701x  | transport, major facilitator family | 80.54 | 412 | MV_4712  | transport, major facilitator family | 99.26 | 403 | BCG_1712x | transport, major facilitator family | 80.54 | 412 | MAP3931x | transport, major facilitator family | 412 | 99.76 |
| MAP4_4048 | polydopterin biosynthesis protein MoeA               | 401 | Rv0438x | Probable polydopterin biosynthesis    | 81.44 | 405 | MV_4711  | polydopterin biosynthesis protein   | 81.44 | 405 | MV_4711  | polydopterin biosynthesis protein   | 99.40 | 404 | BCG_0477x | polydopterin biosynthesis protein   | 81.44 | 405 | MAP3932x | MoeA3                               | 401 | 100   |
| MAP4_4049 | dehydrogenase/reductase                              | 312 | Rv0439x | Probable dehydrogenase/reductase      | 79.49 | 311 | MB0447x  | short chain dehydrogenase           | 79.49 | 311 | MV_4710  | short chain dehydrogenase           | 99.36 | 312 | BCG_0478x | short chain dehydrogenase           | 79.49 | 311 | MAP3933x | short chain dehydrogenase           | 312 | 100   |
| MAP4_4050 | conserved hypothetical protein, cupin domain-contain | 172 | Rv3471x | hypothetical protein                  | 26.53 | 177 | MB3500x  | hypothetical protein                | 26.53 | 177 | MV_4709  | cupin domain-containing protein     | 100   | 164 | BCG_3536x | hypothetical protein                | 26.53 | 177 | MAP3934x | hypothetical protein                | 172 | 100   |
| MAP4_4051 | putative peptidase, metalloprotease family M24 prote | 241 | Rv235x  | Probable cytoplasmic peptidase        | 41.29 | 272 | MB2564x  | peptidase PeptG                     | 41.29 | 272 | MV_4708  | improgeptidase                      | 99.3  | 241 | BCG_0571x | cytoplasmic peptidase pepG          | 41.29 | 272 | MAP3935x | hypothetical protein                | 241 | 100   |
| MAP4_4052 | 60 kDa chaperone 2 GroEL2                            | 441 | Rv0432x | 60 kDa chaperone 2 GroEL2 protein     | 55.26 | 540 | MB0448   | chaperon GroEL                      | 55.26 | 540 | MV_4707  | chaperon GroEL                      | 99.63 | 441 | BCG_0479  | chaperon GroEL                      | 55.26 | 540 | MAP3936x | hypothetical protein                | 441 | 100   |
| MAP4_4053 | hypothetical protein                                 | 266 | Rv0355x | hypothetical protein                  | 49.63 | 289 | MB3855x  | hypothetical protein                | 49.63 | 289 | MV_4706  | hypothetical protein                | 98.87 | 293 | BCG_3619x | hypothetical protein                | 49.63 | 289 | MAP3937  | hypothetical protein                | 266 | 100   |
| MAP4_4054 | hypothetical protein                                 | 130 | Rv0441x | hypothetical protein                  | 67.63 | 142 | MB0449x  | hypothetical protein                | 67.63 | 142 | MV_4705  | hypothetical protein                | 99.23 | 130 | BCG_0480x | hypothetical protein                | 67.63 | 142 | MAP3938x | hypothetical protein                | 130 | 100   |
| MAP4_4055 | PPE family protein                                   | 214 | Rv0442x | PPE family protein PPE10              | 72.22 | 487 | MB0450x  | PPE family protein                  | 70.93 | 479 | MV_4704  | PPE family protein                  | 100   | 214 | BCG_0481x | PPE family protein                  | 70.93 | 479 | MAP3939x | hypothetical protein                | 214 | 100   |
| MAP4_4056 | aminohydroxylase family protein                      | 576 | Rv2913x | Possible D-amine acid aminohydroxyl   | 29.03 | 611 | MB2913x  | D-amine acid aminohydroxylase       | 29.03 | 611 | MV_4703  | aminohydroxylase                    | 98.83 | 576 | BCG_2914x | D-aminohydroxylase                  | 29.03 | 611 | MAP3940x | aminohydroxylase family protein     | 576 | 100   |
| MAP4_4057 | putative phosphatase family protein                  | 121 | Rv0274x | hypothetical protein                  | 26.97 | 193 | MB0280   | hypothetical protein                | 26.97 | 193 | MV_4702  | hypothetical protein                | 98.85 | 121 | BCG_0312  | hypothetical protein                | 26.97 | 193 | MAP3941x | hypothetical protein                | 121 | 100   |
| MAP4_4058 | hypothetical protein                                 | 171 | Rv0443  | hypothetical protein                  | 84.52 | 171 | MV_4701  | hypothetical protein                | 84.52 | 171 | MV_4701  | hypothetical protein                | 98.25 | 171 | BCG_0482  | hypothetical protein                | 84.52 | 171 | MAP3942  | hypothetical protein                | 171 | 100   |
| MAP4_4059 | hypothetical protein                                 | 282 | Rv1262x | hypothetical hit-like protein         | 42.31 | 144 | MB1293x  | Hit-like protein                    | 42.31 | 144 | MV_4699  | hypothetical protein                | 98.58 | 282 | BCG_1321x | Hit family protein                  | 42.31 | 144 | MAP3943  | hypothetical protein                | 282 | 99.63 |
| MAP4_4060 | putative membrane protein, cytochrome c biogenesi    | 576 | Rv2874  | Possible integral membrane C-type cy  | 61.72 | 695 | MB2899   | integral membrane C-type cyto       | 61.72 | 695 | MV_4700  | Dcp2 protein                        | 98.61 | 576 | BCG_2896  | integral membrane C-type cyto       | 61.72 | 695 | MAP3944x | hypothetical protein                | 569 | 99.82 |
| MAP4_4061 | transcriptional regulator, TetR family               | 178 | Rv0452  | Possible transcriptional regulatory p | 78.85 | 235 | MB0452   | transcriptional regulator           | 78.85 | 235 | MV_4698  | TetR family transcriptional regulat | 99.83 |     |           |                                     |       |     |          |                                     |     |       |

# Table S1 continued

|           |                                                       |     |         |                                                                        |       |      |         |                                                               |       |      |           |                                                      |       |     |           |                                                               |       |      |          |                                           |      |       |
|-----------|-------------------------------------------------------|-----|---------|------------------------------------------------------------------------|-------|------|---------|---------------------------------------------------------------|-------|------|-----------|------------------------------------------------------|-------|-----|-----------|---------------------------------------------------------------|-------|------|----------|-------------------------------------------|------|-------|
| MAP4_4111 | cyclopropane-fatty-acyl-phospholipid synthase2, C ma  | 179 | Rv0503c | cyclopropane-fatty-acyl-phospholipid synthase2, C ma                   | 78.22 | 302  | MB0513c | cyclopropane-fatty-acyl-phospholipid synthase2, C ma          | 78.22 | 302  | MAV_4647  | cyclopropane-fatty-acyl-phospholipid synthase2, C ma | 100   | 299 | BCG_0544c | cyclopropane-fatty-acyl-phospholipid synthase2, C ma          | 78.22 | 302  | MAP3995c | Cma24                                     | 179  | 99.67 |
| MAP4_4112 | hypothetical protein                                  | 194 | Rv0504c | hypothetical protein                                                   | 84.34 | 166  | MB0516c | hypothetical protein                                          | 84.34 | 166  | MAV_4646  | hypothetical protein                                 | 100   | 274 | BCG_0547c | hypothetical protein                                          | 84.34 | 166  | MAP3996c | hypothetical protein                      | 279  | 100   |
| MAP4_4113 | phosphoserine phosphatase SerB                        | 303 | Rv0505c | phosphoserine phosphatase SerB                                         | 85.96 | 373  | MB0517c | phosphoserine phosphatase SerB                                | 85.96 | 373  | MAV_4645  | phosphoserine phosphatase SerB                       | 99.34 | 303 | BCG_0548c | phosphoserine phosphatase SerB                                | 85.96 | 373  | MAP3997c | hypothetical protein                      | 306  | 100   |
| MAP4_4114 | hypothetical protein                                  | 209 | Rv0506c | DNA-directed RNA polymerase (beta)                                     | 85.51 | 1172 | MB0586c | DNA-directed RNA polymerase (beta)                            | 85.51 | 1172 | MAV_2817  | hypothetical protein                                 | 40    | 51  | BCG_0716c | DNA-directed RNA polymerase (beta)                            | 85.51 | 1172 | MAP313c  | hypothetical protein                      | 51   | 140   |
| MAP4_4115 | hypothetical protein                                  | 261 | Rv1018c | Probable UDP-N-acetylglucosamine 2-epimerase                           | 27.66 | 495  | MB1046c | DNA-directed N-acetylglucosamine 2-epimerase                  | 27.66 | 495  | MAV_3817  | hypothetical protein                                 | 45.45 | 238 | BCG_1075c | DNA-directed N-acetylglucosamine 2-epimerase                  | 27.66 | 495  | MAP3008c | hypothetical protein                      | 238  | 48.46 |
| MAP4_4116 | hypothetical protein                                  | 220 | Rv0343c | isoniazid inducible gene product                                       | 24.68 | 493  | MB0350c | isoniazid inducible gene product                              | 24.68 | 493  | MAV_2417  | hypothetical protein                                 | 40    | 51  | BCG_0382c | isoniazid inducible gene product                              | 24.68 | 493  | MAP0192c | AccD2                                     | 531  | 27.78 |
| MAP4_4119 | Esat-6 like protein EsatF                             | 90  | Rv3904c | Putative Esat-6 like protein EsatF                                     | 72.22 | 90   | MB3934c | hypothetical protein                                          | 72.22 | 90   | MAV_4643  | hypothetical protein                                 | 98.99 | 96  | BCG_3961c | Esat-6 like protein 12 exon                                   | 72.22 | 90   | MAP3999c | hypothetical protein                      | 90   | 100   |
| MAP4_4120 | Esat-6 like protein EsatF                             | 109 | Rv3905c | Putative Esat-6 like protein EsatF                                     | 67.33 | 103  | MB3935c | hypothetical protein                                          | 67.33 | 103  | MAV_4642  | hypothetical protein                                 | 102   | 102 | BCG_3962c | Esat-6 like protein 13 exon                                   | 67.33 | 103  | MAP3998c | hypothetical protein                      | 102  | 113   |
| MAP4_4121 | hypothetical protein                                  | 89  | Rv0508c | hypothetical protein                                                   | 92.59 | 97   | MB0520c | hypothetical protein                                          | 92.59 | 97   | MAV_4641  | hypothetical protein                                 | 97.75 | 89  | BCG_0551c | hypothetical protein                                          | 92.59 | 97   | MAP4001c | hypothetical protein                      | 89   | 97    |
| MAP4_4122 | glutamyl-tRNA reductase HemA                          | 459 | Rv0509c | Probable glutamyl-tRNA reductase HemA                                  | 86.5  | 468  | MB0509c | glutamyl-tRNA reductase                                       | 86.5  | 468  | MAV_4640  | glutamyl-tRNA reductase                              | 100   | 459 | BCG_0552c | glutamyl-tRNA reductase                                       | 86.5  | 468  | MAP4002c | glutamyl-tRNA reductase                   | 459  | 100   |
| MAP4_4123 | porphobilinogen deaminase HemC                        | 315 | Rv0510c | Probable porphobilinogen deaminase HemC                                | 90.61 | 309  | MB0523c | porphobilinogen deaminase                                     | 90.61 | 309  | MAV_4639  | porphobilinogen deaminase                            | 99.68 | 315 | BCG_0553c | porphobilinogen deaminase                                     | 90.61 | 309  | MAP4003c | porphobilinogen deaminase                 | 315  | 100   |
| MAP4_4124 | uroporphyrinogen-III C-methyltransferase HemD         | 515 | Rv0511c | Probable uroporphyrinogen-III C-methyltransferase HemD                 | 87.59 | 565  | MB0524c | uroporphyrinogen-III C-methyltransferase                      | 87.59 | 565  | MAV_4638  | uroporphyrinogen-III C-methyltransferase             | 98.98 | 515 | BCG_0554c | uroporphyrinogen-III C-methyltransferase                      | 87.59 | 565  | MAP4004c | hypothetical protein                      | 515  | 100   |
| MAP4_4125 | delta-aminolevulinic acid dehydratase HemB            | 326 | Rv0512c | Probable delta-aminolevulinic acid dehydratase HemB                    | 91.08 | 329  | MB0525c | delta-aminolevulinic acid dehydratase                         | 91.08 | 329  | MAV_4637  | delta-aminolevulinic acid dehydratase                | 99.32 | 326 | BCG_0555c | delta-aminolevulinic acid dehydratase                         | 91.08 | 329  | MAP4005c | delta-aminolevulinic acid dehydratase     | 326  | 100   |
| MAP4_4126 | hypothetical protein                                  | 186 | Rv0513c | Possible conserved transmembrane protein                               | 70.88 | 182  | MB0526c | transmembrane protein                                         | 70.88 | 182  | MAV_4636c | transmembrane protein                                | 99.38 | 186 | BCG_0556c | hypothetical protein                                          | 70.88 | 182  | MAP4006c | hypothetical protein                      | 186  | 99.46 |
| MAP4_4127 | hypothetical protein                                  | 66  | Rv0514c | Possible transmembrane protein                                         | 66.67 | 99   | MB0527c | transmembrane protein                                         | 66.67 | 99   | MAV_4634c | transmembrane protein                                | 100   | 86  | BCG_0557c | hypothetical protein                                          | 66.67 | 99   | MAP028c  | hypothetical protein                      | 86   | 41.38 |
| MAP4_4128 | putative anti-anti-sigma factor                       | 146 | Rv0516c | Possible anti-anti-sigma factor                                        | 53.85 | 158  | MB0529c | hypothetical protein                                          | 53.85 | 158  | MAV_4635c | STAS domain-containing protein                       | 99.32 | 146 | BCG_0559c | hypothetical protein                                          | 53.85 | 158  | MAP4007c | hypothetical protein                      | 146  | 100   |
| MAP4_4129 | membrane acyltransferase                              | 437 | Rv0517c | Possible membrane acyltransferase                                      | 76.89 | 436  | MB0530c | membrane acyltransferase                                      | 76.89 | 436  | MAV_4633c | membrane acyltransferase, putative                   | 99.27 | 412 | BCG_0560c | membrane acyltransferase                                      | 76.89 | 436  | MAP4008c | hypothetical protein                      | 437  | 100   |
| MAP4_4130 | hypothetical protein                                  | 229 | Rv0518c | Possible conserved protein                                             | 69.13 | 231  | MB0531c | hypothetical protein                                          | 69.13 | 231  | MAV_4632c | hypothetical protein                                 | 100   | 229 | BCG_0561c | hypothetical protein                                          | 69.13 | 231  | MAP4009c | hypothetical protein                      | 229  | 95.96 |
| MAP4_4131 | hypothetical protein                                  | 38  | Rv1795c | ESX conserved component EvcD ES                                        | 38.64 | 503  | MB1823c | hypothetical protein                                          | 38.64 | 503  | MAV_4631c | hypothetical protein                                 | 100   | 38  | BCG_1837c | hypothetical protein                                          | 38.64 | 503  | MAP3924c | hypothetical protein                      | 40   | 32.43 |
| MAP4_4132 | putative acyltransferase                              | 729 | Rv1595c | hypothetical protein                                                   | 29.59 | 729  | MB1592c | hypothetical protein                                          | 29.59 | 729  | MAV_4630c | acyltransferase domain-containing protein            | 99.01 | 706 | BCG_1618c | hypothetical protein                                          | 29.59 | 729  | MAP4010c | hypothetical protein                      | 720  | 100   |
| MAP4_4133 | hypothetical protein                                  | 317 | Rv0519c | Possible conserved membrane protein                                    | 75.09 | 300  | MB0532c | hypothetical protein                                          | 75.09 | 300  | MAV_4629c | hypothetical protein                                 | 100   | 276 | BCG_0562c | hypothetical protein                                          | 75.09 | 300  | MAP4011c | hypothetical protein                      | 317  | 100   |
| MAP4_4134 | hypothetical protein                                  | 89  | Rv2411c | hypothetical protein                                                   | 39.29 | 551  | MB2434c | hypothetical protein                                          | 39.29 | 551  | MAV_4628c | alkanesulfonate monooxygenase                        | 96.28 | 381 | BCG_2427c | hypothetical protein                                          | 39.29 | 551  | MAP4012c | hypothetical protein                      | 89   | 100   |
| MAP4_4135 | putative alkane-sulfonate monooxygenase               | 446 | Rv0132c | Putative 420-dependent glucose-6-phosphate 2-dehydrogenase 2-reductase | 26.35 | 360  | MB0137c | 420-dependent glucose-6-phosphate 2-dehydrogenase 2-reductase | 26.35 | 360  | MAV_4628c | alkanesulfonate monooxygenase                        | 96.28 | 381 | BCG_0166c | 420-dependent glucose-6-phosphate 2-dehydrogenase 2-reductase | 26.35 | 360  | MAP4013c | hypothetical protein                      | 363  | 100   |
| MAP4_4136 | 2-dehydrogranulate 2-reductase                        | 693 | Rv2401c | TRK system potassium uptake protein                                    | 35.82 | 227  | MB2403c | 2-dehydrogranulate 2-reductase                                | 35.82 | 227  | MAV_4625c | 2-dehydrogranulate 2-reductase                       | 99.34 | 305 | BCG_2204c | TRK system potassium uptake protein                           | 35.82 | 227  | MAP4016c | hypothetical protein                      | 305  | 100   |
| MAP4_4139 | putative mandelate racemase/muonate lactonizing enz   | 343 | Rv0553c | Possible mandelate racemase/muonate lactonizing enz                    | 31.89 | 326  | MB0568c | D-succinylbenzoate synthase                                   | 31.89 | 326  | MAV_4624c | mandelate racemase/muonate lactonizing enzyme        | 99.49 | 393 | BCG_0598c | D-succinylbenzoate synthase                                   | 31.89 | 326  | MAP4017c | hypothetical protein                      | 329  | 99.75 |
| MAP4_4140 | hypothetical protein                                  | 111 | Rv0523c | hypothetical protein                                                   | 76.74 | 131  | MB0536c | hypothetical protein                                          | 76.74 | 131  | MAV_4623c | hypothetical protein                                 | 100   | 142 | BCG_0666c | hypothetical protein                                          | 76.74 | 131  | MAP4018c | hypothetical protein                      | 111  | 100   |
| MAP4_4141 | hypothetical protein                                  | 134 | Rv1161c | Respiratory nitrate reductase (alpha)                                  | 44.44 | 1232 | MB1193c | respiratory nitrate reductase                                 | 44.44 | 1232 | MAV_4622c | hypothetical protein                                 | 97.37 | 114 | BCG_1253c | respiratory nitrate reductase (alpha)                         | 44.44 | 1232 | MAP4019c | hypothetical protein                      | 1232 | 100   |
| MAP4_4142 | glutamate-1-semialdehyde aminotransferase HemI, delta | 446 | Rv0524c | Putative glutamate-1-semialdehyde aminotransferase HemI, delta         | 82.92 | 462  | MB1237c | glutamate-1-semialdehyde aminotransferase                     | 82.92 | 462  | MAV_4621c | glutamate-1-semialdehyde aminotransferase            | 99.32 | 445 | BCG_0587c | glutamate-1-semialdehyde aminotransferase                     | 82.92 | 462  | MAP4020c | glutamate-1-semialdehyde aminotransferase | 446  | 100   |
| MAP4_4143 | phosphoglucomutase family protein                     | 202 | Rv0525c | hypothetical protein                                                   | 84.58 | 202  | MB0528c | hypothetical protein                                          | 84.58 | 202  | MAV_4620c | phosphoglucomutase                                   | 100   | 202 | BCG_0588c | phosphoglucomutase                                            | 84.58 | 202  | MAP4021c | hypothetical protein                      | 202  | 100   |
| MAP4_4144 | thioredoxin                                           | 197 | Rv0526c | Possible thioredoxin protein (thio-d)                                  | 82.23 | 216  | MB0539c | thioredoxin                                                   | 82.23 | 216  | MAV_4619c | thioredoxin                                          | 100   | 197 | BCG_0569c | thioredoxin                                                   | 82.23 | 216  | MAP4022c | hypothetical protein                      | 197  | 100   |
| MAP4_4145 | cytochrome C biogenesis protein CcD4                  | 259 | Rv0527c | Possible cytochrome C-type biogenesis                                  | 88.03 | 259  | MB0540c | cytochrome C-type biogenesis                                  | 88.03 | 259  | MAV_4618c | cytochrome C biogenesis protein                      | 100   | 259 | BCG_0570c | cytochrome c-type biogenesis                                  | 88.03 | 259  | MAP4023c | CcA4                                      | 259  | 100   |
| MAP4_4146 | hypothetical protein                                  | 546 | Rv0528c | Possible conserved transmembrane protein                               | 83.04 | 529  | MB0541c | transmembrane protein                                         | 83.04 | 529  | MAV_4617c | hypothetical protein                                 | 99.45 | 546 | BCG_0571c | hypothetical protein                                          | 83.04 | 529  | MAP4024c | hypothetical protein                      | 546  | 100   |
| MAP4_4147 | cytochrome C biogenesis protein CcA4                  | 325 | Rv0529c | Possible cytochrome C-type biogenesis                                  | 84    | 324  | MB0542c | cytochrome C-type biogenesis                                  | 84    | 324  | MAV_4616c | cytochrome C-type biogenesis protein                 | 99.24 | 325 | BCG_0572c | cytochrome c-type biogenesis                                  | 84    | 324  | MAP4025c | CcB8                                      | 324  | 100   |
| MAP4_4148 | hypothetical protein                                  | 434 | Rv0530c | hypothetical protein                                                   | 66.97 | 403  | MB1873c | hypothetical protein                                          | 66.97 | 403  | MAV_4615c | hypothetical protein                                 | 99.08 | 434 | BCG_0573c | hypothetical protein                                          | 66.97 | 403  | MAP4026c | hypothetical protein                      | 434  | 100   |
| MAP4_4149 | hypothetical protein                                  | 53  | Rv0530A | hypothetical protein                                                   | 86.84 | 53   | MB1874c | hypothetical protein                                          | 21.28 | 140  | MAV_4614c | hypothetical protein                                 | 100   | 53  | BCG_1883c | hypothetical protein                                          | 21.28 | 140  | MAP0924c | hypothetical protein                      | 302  | 75    |
| MAP4_4150 | hypothetical protein                                  | 108 | Rv0531c | Possible conserved membrane protein                                    | 66.67 | 105  | MB0544c | hypothetical protein                                          | 66.67 | 105  | MAV_4613c | hypothetical protein                                 | 100   | 108 | BCG_0574c | hypothetical protein                                          | 66.67 | 105  | MAP4027c | hypothetical protein                      | 110  | 99.07 |
| MAP4_4151 | 3-oxoacyl-ACP synthase III                            | 335 | Rv0533c | 3-oxoacyl-ACP synthase III                                             | 77.01 | 335  | MB0546c | 3-oxoacyl-ACP synthase                                        | 77.01 | 335  | MAV_4612c | 3-oxoacyl-ACP synthase                               | 99.1  | 335 | BCG_0577c | 3-oxoacyl-ACP synthase                                        | 77.01 | 335  | MAP4028c | 3-oxoacyl-ACP synthase III                | 335  | 100   |
| MAP4_4152 | 1,4-dihydroxy-2-naphthoate epimer/transferase MceM    | 290 | Rv0534c | 1,4-dihydroxy-2-naphthoate octamer                                     | 76.76 | 292  | MB0547c | 1,4-dihydroxy-2-naphthoate                                    | 76.76 | 292  | MAV_4611c | 1,4-dihydroxy-2-naphthoate octamer                   | 99.27 | 218 | BCG_0578c | 1,4-dihydroxy-2-naphthoate octamer                            | 76.76 | 292  | MAP4029c | 1,4-dihydroxy-2-naphthoate octamer        | 290  | 100   |
| MAP4_4153 | C-methyladenosine phosphotransferase Pnp              | 760 | Rv0535c | Probable 5-methyladenosine phosphotransferase Pnp                      | 77.85 | 760  | MB0549c | 5-methyladenosine phosphotransferase                          | 77.85 | 760  | MAV_4610c | 5-methyladenosine phosphotransferase                 | 97.35 | 764 | BCG_0579c | 5-methyladenosine phosphotransferase                          | 77.85 | 760  | MAP4030c | 5-methyladenosine phosphotransferase      | 760  | 100   |
| MAP4_4154 | hypothetical protein                                  | 575 | Rv0537c | Probable integral membrane protein                                     | 56.03 | 477  | MB0548c | hypothetical protein                                          | 56.03 | 477  | MAV_4608c | hypothetical protein                                 | 98.61 | 575 | BCG_0581c | hypothetical protein                                          | 56.03 | 477  | MAP4031c | hypothetical protein                      | 575  | 100   |
| MAP4_4157 | hypothetical protein                                  | 559 | Rv0538c | Possible conserved membrane protein                                    | 54.18 | 548  | MB0552c | hypothetical protein                                          | 53.7  | 548  | MAV_4606c | hypothetical protein                                 | 96.48 | 556 | BCG_0582c | hypothetical protein                                          | 53.7  | 548  | MAP4034c | hypothetical protein                      | 559  | 100   |
| MAP4_4158 | dolichyl-phosphate sugar synthase                     | 220 | Rv0539c | Probable dolichyl-phosphate sugar synthase                             | 88.1  | 210  | MB0553c | dolichyl-phosphate sugar synth                                | 88.1  | 210  | MAV_4605c | glycosyltransferase                                  | 99.09 | 220 | BCG_0583c | dolichyl-phosphate sugar synth                                | 88.1  | 210  | MAP4035c | hypothetical protein                      | 220  | 100   |
| MAP4_4159 | hypothetical protein                                  | 218 | Rv0540c | hypothetical protein                                                   | 76.5  | 220  | MB0554c | hypothetical protein                                          | 76.5  | 220  | MAV_4604c | hypothetical protein                                 | 97.1  | 218 | BCG_0584c | hypothetical protein                                          | 76.5  | 220  | MAP4036c | hypothetical protein                      | 218  | 100   |
| MAP4_4160 | hypothetical protein                                  | 458 | Rv0541c | Probable conserved integral membrane protein                           | 77.29 | 449  | MB0555c | hypothetical protein                                          | 77.29 | 449  | MAV_4603c | hypothetical protein                                 | 99.1  | 458 | BCG_0585c | hypothetical protein                                          | 77.29 | 449  | MAP4037c | hypothetical protein                      | 458  | 100   |
| MAP4_4161 | O-succinylbenzoic acid-CoA ligase MceE                | 363 | Rv0542c | Possible O-succinylbenzoic acid-CoA ligase MceE                        | 77.6  | 362  | MB0560c | O-succinylbenzoic acid-CoA ligase                             | 77.6  | 362  | MAV_4602c | O-succinylbenzoic acid-CoA ligase                    | 98.62 | 363 | BCG_0586c | O-succinylbenzoic acid-CoA ligase                             | 77.6  | 362  | MAP4038c | O-succinylbenzoic acid-CoA ligase         | 363  | 100   |
| MAP4_4162 | hypothetical protein                                  | 100 | Rv0543c | hypothetical protein                                                   | 76.09 | 100  | MB0557c | hypothetical protein                                          | 76.09 | 100  | MAV_4601c | hypothetical protein                                 | 98.77 | 81  | BCG_0587c |                                                               |       |      |          |                                           |      |       |

Table S1 continued

|           |                                                        |       |         |                                       |       |      |         |                                     |       |      |         |                                                |       |      |           |                                     |       |      |          |                                       |       |       |
|-----------|--------------------------------------------------------|-------|---------|---------------------------------------|-------|------|---------|-------------------------------------|-------|------|---------|------------------------------------------------|-------|------|-----------|-------------------------------------|-------|------|----------|---------------------------------------|-------|-------|
| MAP4_4216 | exonuclease V alpha chain RecD                         | 574   | Rv0629c | Probable exonuclease V (alpha chain)  | 71.76 | 575  | M06045c | exonuclease V subunit alpha         | 71.58 | 575  | MV_4544 | exoendoxyribonuclease V, alpha sub             | 99.12 | 570  | BCG_0675c | exonuclease V (alpha chain) rec     | 71.58 | 575  | MAP4091c | hypothetical protein                  | 574   | 100   |
| MAP4_4219 | exonuclease V gamma chain RecC                         | 1096  | Rv0631c | Probable exonuclease V gamma chain    | 70.67 | 1097 | M06048c | exonuclease V subunit gamma         | 70.49 | 1097 | MV_4542 | exoendoxyribonuclease V, gamma sub             | 98.36 | 596  | BCG_0678c | exonuclease V (gamma chain)         | 70.58 | 1097 | MAP4094c | RecC                                  | 1096  | 100   |
| MAP4_4220 | methoxy mycolic acid synthase MmaA2                    | 74    | Rv0644c | Methoxy mycolic acid synthase 2 MmaA2 | 74.55 | 287  | Rv0625c | methoxy mycolic acid synthase       | 74.18 | 287  | MV_4536 | lipoglycane-fatty-acyl-phospholipid synthetase | 74.18 | 287  | BCG_0693c | methoxy mycolic acid synthase       | 74.51 | 287  | MAP4095c | hypothetical protein                  | 74    | 100   |
| MAP4_4221 | putative endonuclease family protein                   | 171   | Rv0306  | Probable endonuclease                 | 24.62 | 223  | M03014  | endonuclease                        | 24.62 | 223  | MV_4540 | endonuclease                                   | 98.83 | 171  | BCG_0346c | endonuclease                        | 24.62 | 223  | MAP4096c | hypothetical protein                  | 171   | 100   |
| MAP4_4222 | putative methyltransferase                             | 30.52 | Rv0252  | Putative methyltransferase (methyl)   | 30.52 | 270  | Mb2976  | methyltransferase                   | 30.52 | 270  | MV_4539 | methyltransferase small domain-cy              | 98.39 | 249  | BCG_0293c | methyltransferase                   | 30.52 | 270  | MAP4097c | hypothetical protein                  | 30.52 | 100   |
| MAP4_4223 | putative cyanate hydratase                             | 34.29 | Rv3627c | hypothetical protein                  | 34.29 | 461  | Mb3651c | hypothetical protein                | 34.29 | 461  | MV_4538 | cyanoate hydratase                             | 100   | 155  | BCG_3685c | hypothetical protein                | 34.29 | 461  | MAP4098c | cyanoate hydratase                    | 34.29 | 100   |
| MAP4_4224 | putative phosphatase, patatin family protein           | 33.9  | Rv0373c | Conserved transmembrane protein       | 33.9  | 324  | Mb2033c | transmembrane protein               | 40.25 | 324  | MV_4537 | phosphatase, patatin family pro                | 99.12 | 340  | BCG_2056c | hypothetical protein                | 40.25 | 324  | MAP4099c | hypothetical protein                  | 33.9  | 100   |
| MAP4_4225 | hypothetical protein                                   | 45    | Rv2493  | Possible antiterm VapB38              | 45    | 73   | Mb2021  | hypofunctional protein              | 45    | 73   | MV_4536 | hypofunctional protein                         | 98.11 | 159  | BCG_2513  | hypothetical protein                | 45    | 73   | MAP4100c | hypothetical protein                  | 45    | 100   |
| MAP4_4226 | Methyltransferase, oxidoreductase                      | 788   | Rv0197  | Possible oxidoreductase               | 75.27 | 787  | M04003  | oxidoreductase                      | 75.27 | 788  | MV_4535 | oxidoreductase NarB                            | 97.84 | 788  | BCG_0232  | oxidoreductase                      | 75.27 | 788  | MAP4101c | hypothetical protein                  | 788   | 99.84 |
| MAP4_4227 | enoyl-CoA hydratase Echa3                              | 86.15 | Rv0632c | Probable enoyl-CoA hydratase Echa     | 86.15 | 231  | M06049c | enoyl-CoA hydratase                 | 86.15 | 231  | MV_4534 | enoyl-CoA hydratase                            | 99.13 | 231  | BCG_0679c | enoyl-CoA hydratase                 | 85.71 | 231  | MAP4102c | Echa3                                 | 430   | 100   |
| MAP4_4228 | hypothetical protein                                   | 78.69 | Rv0633c | Possible exported protein             | 78.69 | 279  | M06050c | hypothetical protein                | 75.76 | 279  | MV_4533 | hypothetical protein                           | 100   | 277  | BCG_0680c | hypothetical protein                | 75.76 | 279  | MAP4103c | hypothetical protein                  | 78.69 | 100   |
| MAP4_4229 | glyoxalase II                                          | 237   | Rv0634c | Possible glyoxalase II (hydroxyacyl)  | 88.61 | 237  | M06051c | glyoxalase II                       | 88.61 | 237  | MV_4532 | metallo-beta-lactamase                         | 99.16 | 237  | BCG_0681c | glyoxalase II                       | 88.61 | 237  | MAP4104c | hypothetical protein                  | 237   | 100   |
| MAP4_4230 | hypothetical protein                                   | 56.58 | Rv0634  | hypothetical protein                  | 56.58 | 83   | M06052  | hypothetical protein                | 56.58 | 83   | MV_4531 | hypothetical protein                           | 100   | 84   | BCG_0682  | hypothetical protein                | 56.58 | 83   | MAP4105c | hypothetical protein                  | 76    | 100   |
| MAP4_4231 | SOS ribosomal protein L33                              | 159   | Rv0348  | SOS ribosomal protein L33 Rpm22       | 98.18 | 155  | M06053  | SOS ribosomal protein L33           | 98.18 | 155  | MV_4528 | SOS ribosomal protein L33                      | 97.67 | 159  | BCG_0683  | SOS ribosomal protein L33           | 98.18 | 155  | MAP4106c | SOS ribosomal protein L33             | 159   | 100   |
| MAP4_4232 | [3R]-hydroxyacyl-ACP dehydratase subunit HsdA          | 82.39 | Rv0635  | [3R]-hydroxyacyl-ACP dehydratase      | 82.39 | 158  | M06054  | [3R]-hydroxyacyl-ACP dehydrat       | 82.39 | 158  | MV_4527 | [3R]-hydroxyacyl-ACP dehydratase               | 100   | 159  | BCG_0684  | [3R]-hydroxyacyl-ACP dehydrat       | 82.39 | 158  | MAP4107  | [3R]-hydroxyacyl-ACP dehydrat subu    | 159   | 100   |
| MAP4_4233 | [3R]-hydroxyacyl-ACP dehydratase subunit HsdB          | 92.66 | Rv0636  | [3R]-hydroxyacyl-ACP dehydratase      | 92.66 | 142  | M06055  | [3R]-hydroxyacyl-ACP dehydrat       | 92.66 | 142  | MV_4526 | [3R]-hydroxyacyl-ACP dehydrat                  | 99.25 | 134  | BCG_0685  | [3R]-hydroxyacyl-ACP dehydrat       | 92.66 | 142  | MAP4108  | [3R]-hydroxyacyl-ACP dehydrat subu    | 142   | 100   |
| MAP4_4234 | [3R]-hydroxyacyl-ACP dehydratase subunit HsdC          | 167   | Rv0637  | [3R]-hydroxyacyl-ACP dehydratase      | 79.64 | 166  | M06056  | [3R]-hydroxyacyl-ACP dehydr         | 79.64 | 166  | MV_4525 | [3R]-hydroxyacyl-ACP dehydratase               | 100   | 167  | BCG_0686  | [3R]-hydroxyacyl-ACP dehydrat       | 79.64 | 166  | MAP4109  | [3R]-hydroxyacyl-ACP dehydrat subu    | 167   | 100   |
| MAP4_4235 | preprotein translocase subunit SecE                    | 63.58 | Rv0638  | Probable preprotein translocase subu  | 63.58 | 161  | M06057  | preprotein translocase subunit      | 63.58 | 161  | MV_4523 | preprotein translocase subunit SecE            | 99.32 | 147  | BCG_0687  | preprotein translocase subunit SecE | 63.58 | 161  | MAP4110  | preprotein translocase subunit SecE   | 147   | 100   |
| MAP4_4236 | Transcription antitermination protein NusG             | 85.94 | Rv0639  | Probable transcription antiterminat   | 85.94 | 238  | M06058  | transcription antitermination prote | 85.94 | 238  | MV_4522 | transcription antitermination prote            | 100   | 256  | BCG_0688  | transcription antitermination prote | 85.94 | 238  | MAP4111  | transcription antitermination prote N | 256   | 100   |
| MAP4_4237 | SOS ribosomal protein L11                              | 147   | Rv0640  | SOS ribosomal protein L11 RplK        | 92.96 | 142  | M06059  | SOS ribosomal protein L11           | 92.96 | 142  | MV_4521 | SOS ribosomal protein L11                      | 100   | 142  | BCG_0689  | SOS ribosomal protein L11           | 92.96 | 142  | MAP4112  | SOS ribosomal protein L11             | 147   | 100   |
| MAP4_4238 | SOS ribosomal protein L1                               | 235   | Rv0641  | SOS ribosomal protein L1 RplA         | 93.99 | 235  | M06060  | SOS ribosomal protein L1            | 93.56 | 235  | MV_4520 | SOS ribosomal protein L1                       | 100   | 235  | BCG_0690  | SOS ribosomal protein L1            | 93.56 | 235  | MAP4113  | SOS ribosomal protein L1              | 235   | 100   |
| MAP4_4239 | RNA polymerase sigma-70 factor, ECF subfamily          | 28.57 | Rv1189  | Possible alternative RNA polymerase   | 28.57 | 290  | Mb1221  | RNA polymerase sigma factor         | 28.57 | 290  | MV_4519 | RNA polymerase ECF-subfamily pro               | 98.33 | 420  | BCG_1251c | RNA polymerase sigma factor         | 28.57 | 420  | MAP4114c | hypothetical protein                  | 420   | 100   |
| MAP4_4240 | hypothetical protein                                   | 38.46 | Rv1206  | Probable conserved integral membr     | 38.46 | 224  | Mb1148c | DNA-directed RNA polymerase         | 38.46 | 224  | MV_4518 | ICP7 domain-containing protein                 | 99.14 | 282  | BCG_1276c | integral membrane protein           | 38.46 | 224  | MAP4115c | hypothetical protein                  | 226   | 99.86 |
| MAP4_4241 | methoxy mycolic acid synthase MmaA1                    | 232   | Rv0642c | Methoxy mycolic acid synthase 4 MmaA1 | 89.26 | 301  | M06061c | methoxy mycolic acid synthase       | 88.93 | 301  | MV_4517 | lipoglycane-fatty-acyl-phospholipid synthetase | 99.66 | 298  | BCG_0691c | methoxy mycolic acid synthase       | 88.93 | 301  | MAP4116c | hypothetical protein                  | 298   | 100   |
| MAP4_4242 | methoxy mycolic acid synthase MmaA1                    | 73.08 | Rv0643c | Methoxy mycolic acid synthase 1 MmaA1 | 73.08 | 286  | M06064c | methoxy mycolic acid synthase       | 73.08 | 286  | MV_4516 | methoxy mycolic acid synthase 1                | 99.65 | 286  | BCG_0694c | methoxy mycolic acid synthase       | 73.08 | 286  | MAP4117c | hypothetical protein                  | 286   | 100   |
| MAP4_4243 | lipase/esterase LipG                                   | 78    | Rv0644c | Lipase/esterase LipG                  | 78    | 301  | M06065c | lipase/esterase                     | 78    | 301  | MV_4515 | alpha/beta-hydrolase                           | 99.34 | 302  | BCG_0695c | lipase/esterase LipG                | 78    | 301  | MAP4118c | hypothetical protein                  | 302   | 100   |
| MAP4_4244 | conserved hypothetical protein, ABC1 family protein    | 91.05 | Rv0647c | hypothetical protein                  | 91.05 | 488  | M06066c | hypothetical protein                | 91.05 | 488  | MV_4514 | ABC transporter                                | 99.77 | 444  | BCG_0696c | hypothetical protein                | 91.05 | 488  | MAP4119c | hypothetical protein                  | 452   | 100   |
| MAP4_4245 | hypothetical protein                                   | 35.19 | Rv0310  | Probable conserved transmembrane      | 35.19 | 1184 | Mb0949  | transmembrane protein               | 35.19 | 1184 | MV_4513 | hypothetical protein                           | 98.45 | 108  | BCG_1287c | hypothetical protein                | 35.19 | 1184 | MAP4120c | hypothetical protein                  | 299   | 100   |
| MAP4_4246 | alpha-mannosidase                                      | 1394  | Rv0648  | Alpha-mannosidase                     | 74.85 | 1215 | M06067  | alpha-mannosidase                   | 74.85 | 1215 | MV_4512 | hypothetical protein                           | 98.24 | 1394 | BCG_0697  | alpha-mannosidase                   | 74.85 | 1215 | MAP4121c | hypothetical protein                  | 1407  | 100   |
| MAP4_4247 | malonyl CoA-ACP transacylase FabD2                     | 77.96 | Rv0649  | malonyl CoA-ACP carrier pr            | 77.96 | 224  | M06068  | malonyl CoA-ACP transacylase        | 77.96 | 224  | MV_4511 | FabD2 protein                                  | 98.54 | 205  | BCG_0698  | malonyl CoA-ACP transacylase        | 77.96 | 224  | MAP4122c | FabD2                                 | 205   | 100   |
| MAP4_4248 | sugar kinase                                           | 73.18 | Rv0650  | Possible sugar kinase                 | 73.18 | 302  | M06069  | sugar kinase                        | 73.18 | 302  | MV_4510 | sugar kinase                                   | 99.35 | 306  | BCG_0699  | sugar kinase                        | 73.18 | 302  | MAP4123c | hypothetical protein                  | 306   | 100   |
| MAP4_4249 | hypothetical protein                                   | 38.46 | Rv1145  | Probable conserved transmembrane      | 38.46 | 303  | Mb1177  | transmembrane transport pro         | 38.46 | 303  | MV_4509 | hypothetical protein                           | 99.33 | 150  | BCG_1207  | transmembrane transport pro         | 38.46 | 303  | MAP4124c | hypothetical protein                  | 150   | 100   |
| MAP4_4250 | SOS ribosomal protein L10 RplM                         | 93.23 | Rv0651  | SOS ribosomal protein L10 RplM        | 93.23 | 178  | M06070  | SOS ribosomal protein L10           | 93.23 | 178  | MV_4508 | SOS ribosomal protein L10                      | 99.32 | 146  | BCG_0700  | SOS ribosomal protein L10           | 93.23 | 178  | MAP4125c | SOS ribosomal protein L10             | 178   | 100   |
| MAP4_4251 | SOS ribosomal protein L17/L12 RplP                     | 93.08 | Rv0652  | SOS ribosomal protein L17/L12 RplP    | 93.08 | 130  | M06071  | SOS ribosomal protein L17/L12       | 93.08 | 130  | MV_4507 | SOS ribosomal protein L17/L12                  | 100   | 130  | BCG_0701  | SOS ribosomal protein L17/L12       | 93.08 | 130  | MAP4126c | SOS ribosomal protein L17/L12         | 130   | 100   |
| MAP4_4252 | Transcriptional regulator, TetR family                 | 75.46 | Rv0653  | Possible transcriptional regulatory p | 75.46 | 231  | M06072c | TetR family transcriptional regu    | 75.46 | 231  | MV_4506 | TetR family transcriptional regulat            | 98.24 | 227  | BCG_0702c | TetR family transcriptional regulat | 75.46 | 231  | MAP4127c | hypothetical protein                  | 251   | 100   |
| MAP4_4253 | diionexase                                             | 73.51 | Rv0654  | Probable diionexase                   | 73.51 | 501  | M06073  | diionexase                          | 73.51 | 501  | MV_4505 | Sim14 protein                                  | 98.34 | 501  | BCG_0703  | diionexase                          | 73.51 | 501  | MAP4128c | hypothetical protein                  | 483   | 100   |
| MAP4_4254 | ribonucleotide-transport ATP-binding protein ABC tran  | 436   | Rv0655  | Possible ribonucleotide-transport AT  | 91.94 | 359  | Mb0674  | ribonucleotide ABC transport        | 91.94 | 359  | MV_4504 | ABC transporter ATP-binding prote              | 100   | 336  | BCG_0704  | ribonucleotide-transport ATP-b      | 91.94 | 359  | MAP4129  | hypothetical protein                  | 336   | 100   |
| MAP4_4255 | DNA-directed RNA polymerase beta chain RpoB            | 1175  | Rv0656  | DNA-directed RNA polymerase beta      | 93.94 | 1172 | M06075  | DNA-directed RNA polymerase         | 93.94 | 1172 | MV_4503 | DNA-directed RNA polymerase sub                | 99.91 | 1144 | BCG_0705  | DNA-directed RNA polymerase         | 93.94 | 1172 | MAP4130  | DNA-directed RNA polymerase subun     | 1175  | 99.81 |
| MAP4_4256 | DNA-directed RNA polymerase beta chain RpoB            | 97.49 | Rv0656  | DNA-directed RNA polymerase beta      | 97.49 | 1316 | M06087  | DNA-directed RNA polymerase         | 97.49 | 1316 | MV_4502 | DNA-directed RNA polymerase sub                | 99.27 | 1316 | BCG_0717  | DNA-directed RNA polymerase         | 97.49 | 1316 | MAP4131c | DNA-directed RNA polymerase subun     | 1316  | 100   |
| MAP4_4257 | endonuclease IV End                                    | 81.75 | Rv0670  | Probable endonuclease IV End (end)    | 81.75 | 252  | M06089  | endonuclease IV                     | 81.75 | 252  | MV_4501 | endonuclease IV                                | 98.8  | 325  | BCG_0719  | endonuclease IV                     | 81.75 | 252  | MAP4132c | endonuclease IV                       | 251   | 100   |
| MAP4_4258 | acyl-CoA dehydrogenase FadE8                           | 90.6  | Rv0672  | Possible acyl-CoA dehydrogenase F     | 90.6  | 542  | M06091  | acyl-CoA dehydrogenase              | 90.6  | 542  | MV_4500 | acyl-CoA dehydrogenase                         | 99.62 | 542  | BCG_0721  | acyl-CoA dehydrogenase fadE8        | 90.6  | 542  | MAP4133c | fadE8                                 | 532   | 100   |
| MAP4_4259 | enoyl-CoA hydratase Echa4                              | 92.31 | Rv0673  | Possible enoyl-CoA hydratase Echa4    | 92.31 | 312  | M06092  | enoyl-CoA hydratase                 | 92.31 | 312  | MV_4499 | enoyl-CoA hydratase                            | 99.68 | 312  | BCG_0722  | enoyl-CoA hydratase                 | 92.31 | 312  | MAP4134c | enoyl-CoA hydratase                   | 312   | 100   |
| MAP4_4260 | conserved hypothetical protein, Paax-like protein fami | 239   | Rv0674  | Probable conserved transmembrane      | 239   | 100  | Mb0993  | hypothetical protein                | 239   | 100  | MV_4498 | hypothetical protein                           | 98.74 | 239  | BCG_0723  | hypothetical protein                | 239   | 100  | MAP4135c | hypothetical protein                  | 239   | 100   |
| MAP4_4261 | enoyl-CoA hydratase Echa5                              | 65.31 | Rv0675  | Probable enoyl-CoA hydratase Echa     | 65.31 | 263  | M06094  | enoyl-CoA hydratase                 | 65.31 | 263  | MV_4497 | enoyl-CoA hydratase                            | 100   | 255  | BCG_0724  | enoyl-CoA hydratase                 | 65.31 | 263  | MAP4136c | enoyl-CoA hydratase                   | 263   | 100   |
| MAP4_4262 | conserved threonine rich protein                       | 65.31 | Rv0676  | Conserved threonine rich protein      | 65.31 | 165  | M06098c | hypothetical protein                | 65.31 | 165  | MV_4496 | hypothetical protein                           | 99.31 | 144  | BCG_0728c | hypothetical protein                | 65.31 | 165  | MAP4137c | hypothetical protein                  | 165   | 100   |
| MAP4_4263 | hypothetical protein                                   | 66.67 | Rv0680  | Probable conserved transmembrane      | 66.67 | 124  | M06099c | transmembrane protein               | 66.67 | 124  | MV_4495 | hypothetical protein                           | 100   | 125  | BCG_0729c | hypothetical protein                | 66.67 | 124  | MAP4138c | hypothetical protein                  | 125   | 100   |
| MAP4_4264 | Transcriptional regulator, TetR family                 | 93.68 | Rv0681  | Probable transcriptional regulatory p | 93.68 | 196  | Mb0700  | TetR family transcriptional regu    | 93.68 |      |         |                                                |       |      |           |                                     |       |      |          |                                       |       |       |

Table S1 continued

|           |                                                     |     |         |                                       |       |     |         |                                      |       |     |         |                                      |       |     |           |                                      |       |     |          |                                      |     |     |
|-----------|-----------------------------------------------------|-----|---------|---------------------------------------|-------|-----|---------|--------------------------------------|-------|-----|---------|--------------------------------------|-------|-----|-----------|--------------------------------------|-------|-----|----------|--------------------------------------|-----|-----|
| MAP4_4315 | putative methyltransferase                          | 316 | Rv0630  | Possible S-adenosylmethionine-dep     | 55.89 | 301 | MB0853  | hypothetical protein                 | 55.89 | 301 | MV_4441 | methyltransferase, putative, family  | 99.02 | 306 | BCG_0883  | hypothetical protein                 | 55.89 | 301 | MAP4190c | hypothetical protein                 | 356 | 100 |
| MAP4_4316 | putative methyltransferase                          | 304 | Rv0726c | Possible S-adenosylmethionine-dep     | 66.67 | 367 | MB0747c | hypothetical protein                 | 66.67 | 367 | MV_4442 | methyltransferase                    | 99.36 | 314 | BCG_0776c | hypothetical protein                 | 66.67 | 367 | MAP4191c | hypothetical protein                 | 356 | 100 |
| MAP4_4317 | ketol dehydrogenase Adh                             | 410 | Rv1895  | Possible ketol dehydrogenase          | 28.14 | 309 | MB0848  | ketol dehydrogenase                  | 28.14 | 309 | MV_4443 | ketol dehydrogenase                  | 99.02 | 317 | BCG_0777c | ketol dehydrogenase                  | 28.14 | 309 | MAP4192c | ketol dehydrogenase                  | 410 | 100 |
| MAP4_4318 | L-fucose phosphate aldolase FucA                    | 317 | Rv0727c | Possible L-fucose phosphate aldolase  | 82.03 | 218 | MB0748c | L-fucose phosphate aldolase          | 82.03 | 218 | MV_4439 | L-fucose phosphate aldolase          | 98.43 | 217 | BCG_0778c | L-fucose phosphate aldolase          | 82.03 | 218 | MAP4193c | L-fucose phosphate aldolase          | 317 | 100 |
| MAP4_4319 | D-3-phosphoglycerate dehydrogenase SerA2            | 217 | Rv0728c | Possible D-3-phosphoglycerate dehyd   | 82.15 | 326 | MB0749c | D-3-phosphoglycerate dehyd           | 82.15 | 326 | MV_4438 | D-3-phosphoglycerate dehyd           | 97.25 | 326 | BCG_0779c | D-3-phosphoglycerate dehyd           | 82.15 | 326 | MAP4194c | D-3-phosphoglycerate dehyd           | 327 | 100 |
| MAP4_4320 | putative xylulose kinase XylB                       | 451 | Rv0729  | Possible D-xylulose kinase XylB [xylu | 71.78 | 448 | MB0750  | D-xylulose kinase XylB               | 71.78 | 448 | MV_4437 | carbohydrate kinase, F6GY family     | 99.78 | 451 | BCG_0779c | D-xylulose kinase xylB               | 71.78 | 448 | MAP4195c | hypothetical protein                 | 451 | 100 |
| MAP4_4321 | hypothetical protein                                | 221 | Rv0730  | GCN5-related N-acetyltransferase      | 81.6  | 242 | MB0751  | hypothetical protein                 | 81.6  | 242 | MV_4436 | hypothetical protein                 | 100   | 221 | BCG_0780  | hypothetical protein                 | 81.6  | 242 | MAP4196c | hypothetical protein                 | 221 | 100 |
| MAP4_4322 | putative methyltransferase                          | 303 | Rv0730c | Possible S-adenosylmethionine-dep     | 54.61 | 301 | MB0853  | hypothetical protein                 | 54.61 | 301 | MV_4443 | hypothetical protein                 | 99.02 | 303 | BCG_0883  | hypothetical protein                 | 54.61 | 301 | MAP4197c | hypothetical protein                 | 303 | 100 |
| MAP4_4323 | prophage protein translocase subunit SecY           | 441 | Rv0732  | Probable protein translocase subun    | 94.56 | 441 | MB0751  | protein translocase subun            | 94.56 | 441 | MV_4434 | protein translocase subunit SecY     | 99.77 | 453 | BCG_0782  | protein translocase subunit          | 94.56 | 441 | MAP4198c | protein translocase subunit SecY     | 441 | 100 |
| MAP4_4324 | adenylate kinase Adk                                | 181 | Rv0733  | Adenylate kinase Adk (ATP-AMP tra     | 87.29 | 181 | MB0754  | adenylate kinase                     | 87.29 | 181 | MV_4433 | adenylate kinase                     | 99.45 | 181 | BCG_0783  | adenylate kinase                     | 87.29 | 181 | MAP4199c | adenylate kinase                     | 181 | 100 |
| MAP4_4325 | methionine aminopeptidase MapA                      | 266 | Rv0734  | Methionine aminopeptidase MapA        | 86.09 | 266 | MB0755  | methionine aminopeptidase            | 86.09 | 266 | MV_4432 | methionine aminopeptidase            | 98.12 | 266 | BCG_0784  | methionine aminopeptidase            | 86.09 | 266 | MAP4200c | methionine aminopeptidase            | 266 | 100 |
| MAP4_4326 | RNA polymerase sigma factor SigL                    | 181 | Rv0735  | Probable alternative RNA polymera     | 88.95 | 177 | MB0756  | RNA polymerase sigma factor          | 88.95 | 177 | MV_4431 | RNA polymerase sigma factor SigL     | 99.44 | 176 | BCG_0785  | RNA polymerase sigma factor          | 88.95 | 177 | MAP4201c | RNA polymerase sigma factor SigL     | 181 | 100 |
| MAP4_4327 | putative conserved membrane protein                 | 236 | Rv0736  | Anti-sigma factor RpoH                | 69.32 | 250 | MB0757  | hypothetical protein                 | 69.32 | 250 | MV_4430 | hypothetical protein                 | 100   | 239 | BCG_0786  | hypothetical protein                 | 69.32 | 250 | MAP4202c | hypothetical protein                 | 236 | 100 |
| MAP4_4328 | putative oxidoreductase                             | 413 | Rv0736c | Possible oxidoreductase               | 27.96 | 388 | MB0759c | hypothetical protein                 | 27.96 | 388 | MV_4429 | hypothetical protein                 | 98.06 | 413 | BCG_0800c | hypothetical protein                 | 27.96 | 388 | MAP4203c | hypothetical protein                 | 413 | 100 |
| MAP4_4329 | putative transmembrane protein                      | 197 | Rv1888c | Possible transmembrane protein        | 56.62 | 186 | MB1920c | transmembrane protein                | 49.06 | 239 | MV_4428 | hypothetical protein                 | 98.29 | 197 | BCG_1205c | hypothetical protein                 | 56.62 | 186 | MAP4204c | hypothetical protein                 | 197 | 100 |
| MAP4_4330 | putative methyltransferase, type III family protein | 208 | Rv1147  | hypothetical protein                  | 38.76 | 216 | MB1014  | hypothetical protein                 | 38.76 | 216 | MV_4426 | methyltransferase, UbiE/COQs fam     | 98.08 | 208 | BCG_1208  | hypothetical protein                 | 38.76 | 216 | MAP4205c | hypothetical protein                 | 208 | 100 |
| MAP4_4331 | putative ABC transporter permease family protein    | 832 | Rv0987  | Probable adhesion component transp    | 26.18 | 855 | MB0114  | adhesion component transp            | 25.14 | 431 | MV_4427 | efflux ABC transporter permease      | 97.8  | 817 | BCG_1042  | adhesion component transp            | 25.14 | 855 | MAP4206c | hypothetical protein                 | 832 | 100 |
| MAP4_4332 | putative ABC transporter ATP-binding protein        | 631 | Rv2564  | Probable glutamine-transport ATP-bi   | 46.19 | 330 | MB2393  | glutamine-transport ATP-bi           | 46.19 | 330 | MV_4425 | ABC transporter ATPase               | 98.27 | 631 | BCG_2586  | glutamine-transport ATP-bind         | 46.19 | 330 | MAP4207c | hypothetical protein                 | 631 | 100 |
| MAP4_4333 | putative thiamine pyrophosphate-dependent enzyme    | 601 | Rv3003c | Acetolactate synthase [large subun    | 26.67 | 618 | MB3384  | acetolactate synthase 1 catal        | 26.67 | 618 | MV_4424 | acetolactate synthase                | 98.46 | 601 | BCG_3005c | acetolactate synthase 1 cataly       | 26.67 | 618 | MAP4208c | hypothetical protein                 | 601 | 100 |
| MAP4_4334 | hypothetical protein                                | 215 | Rv1512  | Probable nucleotide sugar epimeras    | 25.67 | 322 | MB3384  | amidase                              | 25.67 | 322 | MV_4423 | hypothetical protein                 | 100   | 215 | BCG_3027c | amidase                              | 25.67 | 322 | MAP4209c | hypothetical protein                 | 215 | 100 |
| MAP4_4335 | putative 3-oxoacyl-ACP synthase III                 | 341 | Rv0533c | 3-oxoacyl-acyl-carrier-protein synt   | 23.08 | 335 | MB3004c | 3-oxoacyl-ACP synthase               | 23.08 | 335 | MV_4422 | 3-oxoacyl-ACP synthase III           | 98.83 | 341 | BCG_0577c | 3-oxoacyl-ACP synthase               | 23.08 | 335 | MAP4210c | hypothetical protein                 | 341 | 100 |
| MAP4_4336 | putative aminotransferase                           | 352 | Rv0772  | Probable histidinol-phosphate amin    | 39.09 | 353 | MB0547  | aminotransferase                     | 39.09 | 353 | MV_4421 | histidinol-phosphate aminotran       | 99.15 | 352 | BCG_3833  | aminotransferase                     | 39.09 | 353 | MAP4211c | hypothetical protein                 | 352 | 100 |
| MAP4_4337 | Transcriptional regulator, MarR family              | 882 | Rv0737  | Possible transcriptional regulator    | 88.2  | 165 | MB0758  | transcriptional regulator            | 88.2  | 165 | MV_4420 | MarR family, transcriptional regulat | 98.81 | 882 | BCG_0787  | transcriptional regulatory prot      | 88.2  | 165 | MAP4212c | hypothetical protein                 | 882 | 100 |
| MAP4_4338 | 3-hydroxyisobutyrate dehydrogenase MmsB             | 188 | Rv0751c | Probable 3-hydroxyisobutyrate dehyd   | 81.12 | 294 | MB0773c | 3-hydroxyisobutyrate dehydro         | 81.12 | 294 | MV_4419 | 3-hydroxyisobutyrate dehydrogen      | 99.31 | 291 | BCG_0802c | 3-hydroxyisobutyrate dehydro         | 80.77 | 298 | MAP4213c | hypothetical protein                 | 188 | 100 |
| MAP4_4339 | acyl-CoA dehydrogenase FadF9                        | 386 | Rv0752c | Probable acyl-CoA dehydrogenase F     | 88.43 | 390 | MB0774c | acyl-CoA dehydrogenase               | 88.43 | 390 | MV_4418 | acyl-CoA dehydrogenase member        | 99.74 | 386 | BCG_0803c | acyl-CoA dehydrogenase FadF9         | 88.43 | 390 | MAP4214c | FadF9                                | 386 | 100 |
| MAP4_4340 | methylmalonate-semialdehyde dehydrogenase MmaA      | 506 | Rv0753c | Probable methylmalonate-semialdeh     | 91.75 | 510 | MB0775c | methylmalonate-semialdehyde          | 91.75 | 510 | MV_4417 | methylmalonate-semialdehyde de       | 99.8  | 506 | BCG_0804c | methylmalonate-semialdehyde          | 91.75 | 510 | MAP4215c | hypothetical protein                 | 506 | 100 |
| MAP4_4341 | hypothetical protein                                | 474 | Rv2000  | hypothetical protein                  | 62.58 | 537 | MB0203  | hypothetical protein                 | 62.58 | 537 | MV_4416 | hypothetical protein                 | 98.73 | 474 | BCG_2017  | hypothetical protein                 | 62.58 | 537 | MAP4216c | hypothetical protein                 | 474 | 100 |
| MAP4_4342 | putative RNA polymerase sigma factor                | 179 | Rv0735  | Probable alternative RNA polymera     | 39.02 | 179 | MB0756  | RNA polymerase sigma factor          | 39.02 | 179 | MV_4435 | RNA polymerase sigma factor, sigm    | 98.88 | 179 | BCG_0805c | RNA polymerase sigma factor          | 39.02 | 179 | MAP4217c | hypothetical protein                 | 179 | 100 |
| MAP4_4343 | Rieske [2Fe-2S] domain-containing protein           | 139 | Rv0406  | hypothetical protein                  | 31.06 | 327 | MB0507  | hypothetical protein                 | 31.06 | 327 | MV_4414 | Rieske [2Fe-2S] domain-containi      | 100   | 139 | BCG_0538  | hypothetical protein                 | 31.06 | 327 | MAP4218c | hypothetical protein                 | 139 | 100 |
| MAP4_4344 | hypothetical protein                                | 130 | Rv1141  | hypothetical protein                  | 37.14 | 539 | MB3841  | hypothetical protein                 | 37.14 | 539 | MV_4413 | Copper binding proteins, plastocya   | 98.46 | 130 | BCG_3873  | hypothetical protein                 | 37.14 | 539 | MAP4219c | hypothetical protein                 | 130 | 100 |
| MAP4_4345 | hypothetical protein                                | 306 | Rv0805  | Class III cyclic nucleotide phospho   | 24.35 | 318 | MB0828  | hypothetical protein                 | 24.35 | 318 | MV_4412 | phosphohistesterase                  | 99.02 | 306 | BCG_0857  | hypothetical protein                 | 24.35 | 318 | MAP4220c | hypothetical protein                 | 306 | 100 |
| MAP4_4346 | putative acyltransferase                            | 362 | Rv0111  | Possible transmembrane acyltransfe    | 44.23 | 685 | MB0492  | transmembrane acyltransfera          | 44.23 | 685 | MV_4401 | AtfA 1                               | 99.45 | 362 | BCG_0144  | acyltransferase                      | 44.23 | 685 | MAP4221c | hypothetical protein                 | 362 | 100 |
| MAP4_4347 | putative acyltransferase AtfA 1                     | 362 | Rv0217  | Possible transmembrane acyltransfe    | 30.27 | 435 | MB0492  | transmembrane acyltransfera          | 30.27 | 435 | MV_4409 | acyltransferase                      | 99.45 | 362 | BCG_0144  | acyltransferase                      | 30.27 | 435 | MAP4222c | AtfA 1                               | 362 | 100 |
| MAP4_4348 | putative acyltransferase AtfA 2                     | 374 | Rv0111  | Possible transmembrane acyltransfe    | 42.62 | 685 | MB0492  | transmembrane acyltransfera          | 42.62 | 685 | MV_4409 | acyltransferase                      | 99.45 | 374 | BCG_0148  | acyltransferase                      | 42.62 | 685 | MAP4223c | AtfA 2                               | 374 | 100 |
| MAP4_4349 | ATDP-4-dehydrohamose 3,5-epimerase RmC              | 201 | Rv3465  | ATDP-4-dehydrohamose 3,5-epim         | 82.65 | 202 | MB3494  | ATDP-4-dehydrohamose 3,5-            | 82.65 | 202 | MV_4407 | ATDP-4-dehydrohamose 3,5-epim        | 99    | 201 | BCG_3530  | ATDP-4-dehydrohamose 3,5             | 82.65 | 202 | MAP4224c | RmC                                  | 201 | 100 |
| MAP4_4350 | ATDP-glucose 4,6-dehydratase RmB                    | 331 | Rv3464  | ATDP-glucose 4,6-dehydratase RmB      | 92.45 | 331 | MB3493  | ATDP-glucose 4,6-dehydrat            | 92.45 | 331 | MV_4406 | ATDP-glucose 4,6-dehydratase         | 100   | 331 | BCG_3529  | ATDP-glucose 4,6-dehydratase         | 92.45 | 331 | MAP4225c | RmB                                  | 331 | 100 |
| MAP4_4351 | hypothetical protein                                | 288 | Rv3463  | hypothetical protein                  | 64.98 | 285 | MB3492  | hypothetical protein                 | 64.98 | 285 | MV_4405 | hypothetical protein                 | 99.31 | 288 | BCG_3528  | hypothetical protein                 | 64.98 | 285 | MAP4226c | hypothetical protein                 | 288 | 100 |
| MAP4_4352 | translational initiation factor IF-1                | 282 | Rv3462  | translational initiation factor IF-1  | 82.86 | 285 | MB3491  | translational initiation factor      | 82.86 | 285 | MV_4404 | hypothetical protein                 | 98.94 | 282 | BCG_3527c | translational initiation factor IF-1 | 82.86 | 285 | MAP4227c | translational initiation factor IF-1 | 282 | 100 |
| MAP4_4353 | translational initiation factor IF-1                | 73  | Rv3462c | translational initiation factor IF-1  | 100   | 73  | MB3491c | translational initiation factor IF-1 | 100   | 73  | MV_4403 | translational initiation factor IF-1 | 100   | 73  | BCG_3527c | translational initiation factor IF-1 | 100   | 73  | MAP4228c | translational initiation factor IF-1 | 73  | 100 |
| MAP4_4354 | S05 ribosomal protein L36 RpmJ                      | 37  | Rv3461c | S05 ribosomal protein L36 RpmJ        | 97.3  | 37  | MB3490c | S05 ribosomal protein L36            | 97.3  | 37  | MV_4402 | S05 ribosomal protein L36            | 100   | 37  | BCG_3526c | S05 ribosomal protein L36            | 97.3  | 37  | MAP4229c | S05 ribosomal protein L36            | 37  | 100 |
| MAP4_4355 | S05 ribosomal protein S13 RpsM                      | 139 | Rv3460c | S05 ribosomal protein S13 RpsM        | 94.35 | 139 | MB3489c | S05 ribosomal protein S13            | 94.35 | 139 | MV_4401 | S05 ribosomal protein S13            | 100   | 139 | BCG_3525c | S05 ribosomal protein S13            | 94.35 | 139 | MAP4230c | S05 ribosomal protein S13            | 139 | 100 |
| MAP4_4356 | S05 ribosomal protein S11 RpsK                      | 124 | Rv3459c | S05 ribosomal protein S11 RpsK        | 94.96 | 124 | MB3488c | S05 ribosomal protein S11            | 94.96 | 124 | MV_4400 | S05 ribosomal protein S11            | 100   | 124 | BCG_3524c | S05 ribosomal protein S11            | 94.96 | 124 | MAP4231c | S05 ribosomal protein S11            | 124 | 100 |
| MAP4_4357 | S05 ribosomal protein S4 RpsD                       | 201 | Rv3458c | S05 ribosomal protein S4 RpsD         | 93.03 | 201 | MB3487c | S05 ribosomal protein S4             | 93.03 | 201 | MV_4399 | S05 ribosomal protein S4             | 100   | 201 | BCG_3523c | S05 ribosomal protein S4             | 93.03 | 201 | MAP4232c | S05 ribosomal protein S4             | 201 | 100 |
| MAP4_4358 | DNA-directed RNA polymerase alpha subunit           | 347 | Rv3457c | Probable DNA-directed RNA polymer     | 96.83 | 347 | MB3486c | DNA-directed RNA polymerase          | 96.83 | 347 | MV_4398 | DNA-directed RNA polymerase sub      | 100   | 347 | BCG_3522c | DNA-directed RNA polymerase          | 96.83 | 347 | MAP4233c | DNA-directed RNA polymerase subunit  | 347 | 100 |
| MAP4_4359 | S05 ribosomal protein L17 RplQ                      | 186 | Rv3456c | S05 ribosomal protein L17 RplQ        | 92.74 | 180 | MB3485c | S05 ribosomal protein L17            | 92.74 | 180 | MV_4397 | S05 ribosomal protein L17            | 98.39 | 186 | BCG_3521c | S05 ribosomal protein L17            | 92.74 | 180 | MAP4234c | S05 ribosomal protein L17            | 186 | 100 |
| MAP4_4360 | IRNA pseudouridine synthase A                       | 211 | Rv3455c | IRNA pseudouridine synthase           | 83.2  | 297 | MB3484c | IRNA pseudouridine synthase          | 83.2  | 297 | MV_4396 | IRNA pseudouridine synthase A        | 99.6  | 211 | BCG_3520c | IRNA pseudouridine synthase          | 83.2  | 297 | MAP4235c | IRNA pseudouridine synthase A        | 211 | 100 |
| MAP4_4361 | putative cutinase precursor Cut4                    | 737 | Rv3452  | Probable cutinase precursor Cut4      | 77.37 | 256 | MB3482  | cutinase                             | 77.37 | 256 | MV_4395 | cutinase                             | 99.03 | 206 |           |                                      |       |     |          |                                      |     |     |

Table S1 continued

|           |                                                         |       |         |                                         |       |      |         |                                 |       |      |          |                                       |       |      |           |                                 |       |      |          |                                    |      |       |
|-----------|---------------------------------------------------------|-------|---------|-----------------------------------------|-------|------|---------|---------------------------------|-------|------|----------|---------------------------------------|-------|------|-----------|---------------------------------|-------|------|----------|------------------------------------|------|-------|
| MAP4_4413 | lipoprotein LpP                                         | 423   | Rv0671  | Possible conserved lipoprotein LpP      | 49.84 | 280  | MB0690  | lipoprotein LpP                 | 49.84 | 280  | MAV_5250 | LpP protein                           | 97.77 | 314  | BCG_0270  | lipoprotein lpqP                | 49.84 | 280  | MAP4288  | hypothetical protein               | 423  | 100   |
| MAP4_4414 | putative secretory lipase                               | 336   | Rv1592c | hypothetical protein                    | 27.48 | 446  | MB1518c | hypothetical protein            | 27.48 | 446  | MAV_5251 | secretory lipase                      | 99.31 | 436  | BCG_1630c | hypothetical protein            | 27.48 | 446  | MAP4289  | hypothetical protein               | 336  | 100   |
| MAP4_4415 | Transcriptional regulator, TetR family                  | 186   | Rv0775c | hypothetical protein                    | 24.78 | 207  | MB0798c | Transcriptional regulator       | 24.78 | 207  | MAV_5252 | hypothetical protein                  | 100   | 186  | BCG_0827  | hypothetical protein            | 24.78 | 207  | MAP4290  | hypothetical protein               | 186  | 100   |
| MAP4_4416 | Transcriptional regulator, TetR family                  | 210   | Rv0578  | Probable transcriptional regulator      | 85.07 | 201  | MB0800  | Transcriptional regulator       | 85.07 | 201  | MAV_5253 | TetR family transcriptional regulator | 100   | 202  | BCG_0109  | Transcriptional regulatory prot | 85.57 | 201  | MAP4291c | hypothetical protein               | 202  | 100   |
| MAP4_4417 | putative oxidoreductase                                 | 79.71 | Rv0077c | Probable oxidoreductase                 | 79.71 | 276  | MB0079c | oxidoreductase                  | 79.71 | 276  | MAV_5254 | hydrolase, alpha/beta hydrolase fa    | 100   | 276  | BCG_0108  | oxidoreductase                  | 79.71 | 276  | MAP4292  | hypothetical protein               | 276  | 100   |
| MAP4_4418 | short-chain type hydroxysteroidase                      | 253   | Rv3549c | Probable short-chain type dehydrogenase | 35.22 | 259  | MB3579c | short chain dehydrogenase       | 35.22 | 259  | MAV_5255 | NAD dependent epimerase/dehydr        | 99.6  | 253  | BCG_3613c | short chain dehydrogenase       | 35.22 | 259  | MAP4293  | hypothetical protein               | 253  | 100   |
| MAP4_4419 | fatty-acyl-CoA ligase FadD1                             | 546   | Rv1750c | Possible fatty-acyl-CoA ligase FadD1    | 80.42 | 532  | MB1713c | acyl-CoA synthetase             | 80.42 | 532  | MAV_5257 | acyl-CoA synthetase                   | 98.72 | 546  | BCG_1789c | acyl-CoA synthetase             | 80.42 | 532  | MAP4294  | acyl-CoA synthetase                | 546  | 100   |
| MAP4_4420 | hypothetical protein                                    | 216   | Rv1176c | hypothetical protein                    | 29.11 | 189  | MB1209c | hypothetical protein            | 29.11 | 189  | MAV_5256 | hypothetical protein                  | 99.61 | 216  | BCG_1239c | hypothetical protein            | 29.11 | 189  | MAP4295c | hypothetical protein               | 216  | 100   |
| MAP4_4421 | hypothetical protein                                    | 143   | Rv342c  | hypothetical protein                    | 32.47 | 311  | MB3572c | hypothetical protein            | 32.47 | 311  | MAV_5258 | hypothetical protein                  | 97.9  | 143  | BCG_3606c | hypothetical protein            | 32.67 | 311  | MAP4296c | hypothetical protein               | 143  | 100   |
| MAP4_4422 | hypothetical protein                                    | 388   | Rv3540c | Probable lipid transfer protein or ket  | 30.96 | 386  | MB3570c | lipid-transfer protein          | 30.96 | 386  | MAV_5259 | hypothetical protein                  | 98.97 | 388  | BCG_3604c | lipid-transfer protein          | 30.96 | 386  | MAP4297c | hypothetical protein               | 388  | 100   |
| MAP4_4423 | hypothetical protein                                    | 109   | Rv0275c | Possible transcriptional regulatory pr  | 40.74 | 241  | MB0281c | TetR family transcriptional reg | 40.74 | 241  | MAV_5260 | hypothetical protein                  | 98.17 | 109  | BCG_0313c | TetR family transcriptional reg | 40.74 | 241  | MAP0788c | aminotransferase                   | 393  | 47.37 |
| MAP4_4424 | putative CoA-transferase family III protein             | 776   | Rv1866  | hypothetical protein                    | 27.73 | 778  | MB1897  | hypothetical protein            | 27.73 | 778  | MAV_5261 | carb/bar family protein               | 97.94 | 776  | BCG_1902  | hypothetical protein            | 27.73 | 778  | MAP4298c | hypothetical protein               | 776  | 100   |
| MAP4_4425 | putative amidohydrolase                                 | 451   | Rv3510c | hypothetical protein                    | 25.47 | 278  | MB3506c | amidohydrolase                  | 25.47 | 278  | MAV_5262 | amidohydrolase                        | 99.11 | 457  | BCG_3574c | hypothetical protein            | 25.47 | 278  | MAP4299c | hypothetical protein               | 451  | 100   |
| MAP4_4426 | putative transcriptional regulator, LacI family protein | 334   | Rv0328  | Possible transcriptional regulatory p   | 36    | 200  | MB0335  | TetR/AcrR family transcriptio   | 36    | 200  | MAV_5263 | LacI family transcriptional regulato  | 99.4  | 334  | BCG_0367  | TetR family transcriptional reg | 36    | 200  | MAP4300c | hypothetical protein               | 334  | 100   |
| MAP4_4427 | hypothetical protein                                    | 137   | Rv3422c | hypothetical protein                    | 30.47 | 311  | MB3572c | hypothetical protein            | 30.47 | 311  | MAV_5264 | acyl dehydratase                      | 98.54 | 137  | BCG_3606c | hypothetical protein            | 30.47 | 311  | MAP4301c | hypothetical protein               | 137  | 100   |
| MAP4_4428 | hypothetical protein                                    | 402   | Rv3540c | Probable lipid transfer protein or ket  | 29.44 | 386  | MB3570c | lipid-transfer protein          | 29.44 | 386  | MAV_5265 | nonspecific lipid-transfer protein    | 99.5  | 404  | BCG_3604c | lipid-transfer protein          | 29.44 | 386  | MAP4302c | hypothetical protein               | 402  | 99    |
| MAP4_4429 | putative acyl-CoA dehydrogenase                         | 678   | Rv0271c | Possible acyl-CoA dehydrogenase F       | 37.64 | 731  | MB0271c | acyl-CoA dehydrogenase          | 37.64 | 731  | MAV_5267 | acyl-CoA dehydrogenase                | 40.18 | 707  | BCG_0309c | acyl-CoA dehydrogenase fadE6    | 37.64 | 731  | MAP4303c | hypothetical protein               | 678  | 100   |
| MAP4_4430 | Transcriptional regulator, TetR family                  | 226   | Rv1556  | Possible regulatory protein             | 38.78 | 202  | MB1581  | rgulatory protein               | 38.78 | 202  | MAV_5267 | TetR family transcriptional regulato  | 100   | 194  | BCG_1607  | regulatory protein              | 38.78 | 202  | MAP4304c | hypothetical protein               | 226  | 100   |
| MAP4_4431 | hypothetical protein                                    | 365   | Rv3531c | hypothetical protein                    | 26.98 | 375  | MB3561c | hypothetical protein            | 26.98 | 375  | MAV_5268 | hypothetical protein                  | 98.8  | 365  | BCG_3595c | hypothetical protein            | 26.98 | 375  | MAP4305c | hypothetical protein               | 365  | 100   |
| MAP4_4432 | hypothetical protein                                    | 390   | Rv3524c | hypothetical protein                    | 32.1  | 384  | MB3556c | hypothetical protein            | 32.1  | 384  | MAV_5269 | hypothetical protein                  | 99.49 | 390  | BCG_3593c | hypothetical protein            | 32.1  | 384  | MAP4306c | hypothetical protein               | 390  | 100   |
| MAP4_4433 | hypothetical protein                                    | 355   | Rv3071  | hypothetical protein                    | 55.04 | 369  | MB3098  | hypothetical protein            | 55.04 | 369  | MAV_5270 | hypothetical protein                  | 98.59 | 355  | BCG_3096  | hypothetical protein            | 55.04 | 369  | MAP4307  | hypothetical protein               | 355  | 100   |
| MAP4_4434 | fructose-bisphosphate aldolase                          | 297   | Rv1084  | hypothetical protein                    | 30.56 | 673  | MB1018  | hypothetical protein            | 30.56 | 673  | MAV_5271 | fructose-1,6-bisphosphate aldolase    | 99.66 | 297  | BCG_1142  | hypothetical protein            | 30.56 | 673  | MAP4308c | Fructose-1,6-bisphosphate aldolase | 309  | 100   |
| MAP4_4435 | anti-sigma factor                                       | 125   | Rv3872c | Anti-anti-sigma factor RvB (anti-sig    | 44    | 122  | MB3712c | hypothetical protein            | 45.45 | 81   | MAV_5272 | anti-anti-sigma factor                | 99.2  | 125  | BCG_3746c | hypothetical protein            | 45.45 | 81   | MAP4309  | hypothetical protein               | 110  | 99.09 |
| MAP4_4436 | putative aminoglycoside phosphotransferase              | 361   | Rv3168  | Putative aminoglycoside phosphotran     | 27.37 | 378  | MB3193  | hypothetical protein            | 27.37 | 378  | MAV_5273 | phosphotransferase enzyme family      | 98.89 | 361  | BCG_1192  | hypothetical protein            | 27.37 | 378  | MAP4310c | hypothetical protein               | 361  | 100   |
| MAP4_4437 | hypothetical protein                                    | 378   | Rv3169  | hypothetical protein                    | 28.03 | 374  | MB3194  | hypothetical protein            | 28.03 | 374  | MAV_5274 | hypothetical protein                  | 98.41 | 378  | BCG_1193  | hypothetical protein            | 28.03 | 374  | MAP4311c | hypothetical protein               | 378  | 100   |
| MAP4_4438 | Transcriptional regulator, TetR family                  | 206   | Rv0472c | Probable transcriptional regulatory p   | 27.21 | 234  | MB0482c | hypothetical protein            | 27.21 | 234  | MAV_5275 | TetR family transcriptional regulat   | 99.51 | 206  | BCG_0513c | TetR family transcriptional reg | 24.74 | 234  | MAP4312  | hypothetical protein               | 206  | 100   |
| MAP4_4439 | putative phosphotransferase enzyme family protein       | 374   | Rv3197  | Probable conserved ATP-binding p        | 55.56 | 447  | MB3220  | ABC transporter ATP-binding     | 55.56 | 447  | MAV_5276 | phosphotransferase enzyme family      | 99.2  | 378  | BCG_3220  | ABC transporter ATP-binding p   | 55.56 | 447  | MAP4313  | hypothetical protein               | 374  | 100   |
| MAP4_4440 | putative amidohydrolase family protein                  | 588   | Rv2913c | Possible D-amino acid amidohydroly      | 27.52 | 611  | MB2937c | D-amino acid amidohydrolase     | 27.52 | 611  | MAV_5277 | amidohydrolase                        | 99.49 | 588  | BCG_2934c | D-amino acid amidohydrolase     | 27.52 | 611  | MAP4314  | hypothetical protein               | 588  | 100   |
| MAP4_4441 | putative dioxigenase, ResA (Zn-2S) domain-contain       | 148   | Rv3163c | Possible dioxigenase                    | 34.3  | 382  | MB3186c | dioxigenase                     | 34.3  | 382  | MAV_5278 | ResA (Zn-2Fe) domain-containing       | 98.21 | 148  | BCG_3185c | dioxigenase                     | 34.3  | 382  | MAP4315  | hypothetical protein               | 148  | 100   |
| MAP4_4442 | hypothetical protein                                    | 126   | Rv0076c | Probable membrane protein               | 50    | 129  | MB0076c | hypothetical protein            | 50    | 129  | MAV_5279 | hypothetical protein                  | 100   | 74   | BCG_0107c | hypothetical protein            | 50    | 129  | MAP4316  | hypothetical protein               | 126  | 100   |
| MAP4_4443 | two-component system response regulator                 | 218   | Rv3133c | Two component transcriptional regul     | 36.71 | 217  | MB3133c | two component sensor kinase     | 36.71 | 217  | MAV_5280 | two-component system response r       | 98.62 | 218  | BCG_3156c | two component transcriptional   | 36.71 | 217  | MAP4317  | hypothetical protein               | 218  | 100   |
| MAP4_4444 | putative two-component histidine kinase                 | 406   | Rv0845  | Possible two component sensor kin       | 25.65 | 425  | MB0868  | two component sensor kinase     | 25.65 | 425  | MAV_5281 | histidine kinase domain-containing    | 98.77 | 406  | BCG_0897  | two component sensor kinase     | 25.65 | 425  | MAP4318c | hypothetical protein               | 406  | 100   |
| MAP4_4445 | hypothetical protein                                    | 126   | Rv1128c | Possible oxidoreductase                 | 39.22 | 338  | MB1170c | oxidoreductase                  | 39.22 | 338  | MAV_5282 | hypothetical protein                  | 100   | 126  | BCG_1200c | oxidoreductase                  | 39.22 | 338  | MAP4319  | hypothetical protein               | 126  | 100   |
| MAP4_4446 | transmembrane transport protein, MmpL family            | 952   | Rv0450c | Probable conserved transmembrane        | 35.53 | 967  | MB1787  | transmembrane transport pr      | 47.78 | 945  | MAV_5284 | hypothetical protein                  | 100   | 126  | BCG_1797  | transmembrane transport prot    | 47.78 | 945  | MAP4320  | hypothetical protein               | 952  | 100   |
| MAP4_4447 | hypothetical protein                                    | 1403  | Rv3894c | ESX conserved component EccC ES         | 83.73 | 1396 | MB3924c | hypothetical protein            | 89.7  | 833  | MAV_5292 | fsk/SpoIIIE family protein            | 30.62 | 1375 | BCG_3951c | hypothetical protein            | 89.7  | 833  | MAP4321c | hypothetical protein               | 1403 | 99.93 |
| MAP4_4450 | hypothetical protein                                    | 288   | Rv3896c | hypothetical protein                    | 64.73 | 302  | MB3926c | hypothetical protein            | 59.67 | 288  | MAV_5286 | transglycosylase                      | 96.88 | 288  | BCG_3953c | hypothetical protein            | 59.67 | 288  | MAP4324c | hypothetical protein               | 288  | 100   |
| MAP4_4451 | hypothetical protein                                    | 306   | Rv2083  | hypothetical protein                    | 53.82 | 314  | MB3927c | hypothetical protein            | 56.35 | 329  | MAV_5287 | hypothetical protein                  | 100   | 306  | BCG_3954c | hypothetical protein            | 56.35 | 329  | MAP4325c | hypothetical protein               | 306  | 100   |
| MAP4_4452 | hypothetical protein                                    | 719   | Rv3996c | hypothetical protein                    | 64.69 | 410  | MB3928c | hypothetical protein            | 73.61 | 293  | MAV_5288 | hypothetical protein                  | 98.28 | 419  | BCG_3955c | hypothetical protein            | 73.61 | 293  | MAP4326c | hypothetical protein               | 719  | 100   |
| MAP4_4453 | hypothetical protein                                    | 181   | Rv3901c | Possible membrane protein               | 58.75 | 149  | MB3911c | hypothetical protein            | 58.75 | 149  | MAV_5290 | hypothetical protein                  | 35.08 | 217  | BCG_3956c | hypothetical protein            | 58.75 | 149  | MAP4327c | hypothetical protein               | 181  | 100   |
| MAP4_4454 | hypothetical protein                                    | 188   | Rv3901c | Possible membrane protein               | 43.36 | 149  | MB3911c | hypothetical protein            | 43.36 | 149  | MAV_5290 | hypothetical protein                  | 74.87 | 217  | BCG_3958c | hypothetical protein            | 51.22 | 131  | MAP4328c | hypothetical protein               | 188  | 100   |
| MAP4_4455 | hypothetical protein                                    | 109   | Rv2078  | hypothetical protein                    | 56.31 | 104  | MB2104  | hypothetical protein            | 56.31 | 104  | MAV_5291 | hypothetical protein                  | 94.44 | 72   | BCG_2097  | hypothetical protein            | 56.31 | 104  | MAP4329c | hypothetical protein               | 109  | 100   |
| MAP4_4456 | hypothetical protein                                    | 655   | Rv2079  | hypothetical protein                    | 51.96 | 656  | MB2105  | hypothetical protein            | 52.1  | 656  | MAV_5292 | hypothetical protein                  | 96.64 | 655  | BCG_2098  | hypothetical protein            | 52.1  | 656  | MAP4330c | hypothetical protein               | 655  | 100   |
| MAP4_4457 | hypothetical protein                                    | 169   | Rv3906c | hypothetical protein                    | 75.74 | 169  | MB3936c | hypothetical protein            | 75.74 | 169  | MAV_5293 | hypothetical protein                  | 99.41 | 169  | BCG_3963c | hypothetical protein            | 75.74 | 169  | MAP4331c | hypothetical protein               | 169  | 100   |
| MAP4_4458 | poly(A) polymerase                                      | 480   | Rv3907c | Probable poly(A) polymerase PnkA        | 87.06 | 480  | MB3937c | poly(A) polymerase              | 87.06 | 480  | MAV_5294 | rRNA adenylyltransferase              | 99.17 | 480  | BCG_3964c | poly(A) polymerase              | 87.06 | 480  | MAP4332c | trkK                               | 480  | 100   |
| MAP4_4459 | hypothetical protein                                    | 542   | Rv2079  | hypothetical protein                    | 55.09 | 656  | MB2105  | hypothetical protein            | 55.09 | 656  | MAV_5295 | hypothetical protein                  | 94.41 | 545  | BCG_2098  | hypothetical protein            | 55.09 | 656  | MAP4333c | hypothetical protein               | 542  | 100   |
| MAP4_4460 | putative hydrolase, NUDIX domain protein                | 249   | Rv3908  | Possible mutator protein MutT4          | 81.03 | 248  | MB3938  | hypothetical protein            | 81.03 | 248  | MAV_5296 | MutT/nudix family protein             | 100   | 249  | BCG_3965  | hypothetical protein            | 81.03 | 248  | MAP4334  | hypothetical protein               | 249  | 100   |
| MAP4_4461 | hypothetical protein                                    | 800   | Rv3909  | hypothetical protein                    | 76.43 | 802  | MB3939  | hypothetical protein            | 76.43 | 802  | MAV_5301 | acyl-CoA dehydrogenase                | 33.33 | 802  | BCG_3966  | hypothetical protein            | 76.3  | 802  | MAP4335  | hypothetical protein               | 800  | 100   |
| MAP4_4462 | hypothetical protein                                    | 1184  | Rv3910  | Probable conserved transmembrane        | 77.01 | 1184 | MB3940  | transmembrane protein           | 77.01 | 1184 | MAV_5298 | hypothetical protein                  | 99.16 | 211  | BCG_3967  | hypothetical protein            | 77.01 | 1184 | MAP4336  | hypothetical protein               | 1188 | 99.82 |
| MAP4_4463 | RNA polymerase-sigma factor SigM                        | 195   | Rv3911  | Possible alternative RNA polymera       | 82.16 | 196  | MB3941  | RNA polymerase-s                |       |      |          |                                       |       |      |           |                                 |       |      |          |                                    |      |       |



Table S3

Table S3. Univariate statistical comparisons of responses between clinical and subclinical cows on 729 seroreactive Mtb proteins

| Rank <sup>a</sup> | Mtb Gene ID | Map Homolog | % Identity | Description                                                                    | Spot ID          | T Test P-value | T Test BH P-value | AUC  | Rank-Sum P-value | Rank Sum BH P-value | Mean all infected <sup>b</sup> | Mean Subclinical | 95% CI Minimum | 95% CI Maximum | Median Subclinical | Mean Clinical | 95% CI Minimum | 95% CI Maximum | Median Clinical |
|-------------------|-------------|-------------|------------|--------------------------------------------------------------------------------|------------------|----------------|-------------------|------|------------------|---------------------|--------------------------------|------------------|----------------|----------------|--------------------|---------------|----------------|----------------|-----------------|
| 1                 | Rv1860      | MAP1569     | 78         | Alanine and proline rich secreted protein Apa (fibronectin attachment protein) | Rv1860.1477      | 4.39E-02       | 6.27E-01          | 1.00 | 2.38E-02         | 7.98E-01            | 14.5                           | 13.0             | 12.0           | 14.0           | 13.1               | 15.3          | 15.1           | 15.5           | 15.3            |
| 2                 | Rv2878c     | MAP2942c    | 78         | Soluble secreted antigen Mpt53 precursor                                       | Rv2878c.3783     | 2.25E-03       | 4.10E-01          | 1.00 | 2.38E-02         | 7.98E-01            | 13.7                           | 11.7             | 11.0           | 12.4           | 11.7               | 14.8          | 14.3           | 15.2           | 15.0            |
| 3                 | Rv3879c     | MAP2472     | 50         | ESX-1 secretion-associated protein EspK Alanine and proline rich               | Rv3879c.4124     | 3.04E-01       | 7.74E-01          | 0.22 | 2.62E-01         | 8.76E-01            | 14.7                           | 14.9             | 14.5           | 15.2           | 15.0               | 14.6          | 14.5           | 14.8           | 14.6            |
| 4                 | Rv3043c     | MAP3091c    | 93         | Probable cytochrome C oxidase polypeptide I CtaD (cytochrom                    | Rv3043c.1478     | 5.97E-01       | 9.20E-01          | 0.56 | 9.05E-01         | 9.80E-01            | 14.5                           | 14.4             | 14.2           | 14.7           | 14.4               | 14.5          | 14.2           | 14.8           | 14.4            |
| 5                 | Rv2672      | MAP2792     | 78         | Possible secreted protease                                                     | Rv2672.1481      | 9.61E-01       | 9.82E-01          | 0.44 | 9.05E-01         | 9.80E-01            | 14.4                           | 14.4             | 13.5           | 15.4           | 14.6               | 14.4          | 13.8           | 14.9           | 14.5            |
| 6                 | Rv3515c     | MAP0550     | 90         | Fatty-acid-CoA ligase FadD19 (fatty-acid-CoA synthetase) (fatty                | Rv3515c.3817     | 7.86E-01       | 9.65E-01          | 0.50 | 1.00E+00         | 1.00E+00            | 14.3                           | 14.4             | 14.0           | 14.7           | 14.3               | 14.3          | 13.9           | 14.7           | 14.4            |
| 7                 | Rv0954      | MAP0900     | 55         | Probable conserved transmembrane protein                                       | Rv0954.2404      | 9.25E-01       | 9.81E-01          | 0.56 | 9.05E-01         | 9.80E-01            | 14.2                           | 14.2             | 13.7           | 14.6           | 14.1               | 14.2          | 13.7           | 14.7           | 14.4            |
| 8                 | Rv0479c     | MAP3972c    | 59         | Probable conserved membrane protein                                            | Rv0479c.381      | 9.54E-01       | 9.82E-01          | 0.44 | 9.05E-01         | 9.80E-01            | 14.2                           | 14.2             | 13.7           | 14.6           | 14.3               | 14.1          | 13.8           | 14.5           | 14.2            |
| 9                 | Rv3614c     | MAP2306     | 43         | ESX-1 secretion-associated protein EspD                                        | Rv3614c.3831     | 4.37E-01       | 8.38E-01          | 0.56 | 9.05E-01         | 9.80E-01            | 14.1                           | 14.0             | 13.9           | 14.1           | 14.0               | 14.1          | 13.8           | 14.4           | 14.0            |
| 10                | Rv0338c     | MAP3831c    | 77         | Probable iron-sulfur-binding reductase                                         | Rv0338c.1240     | 7.76E-01       | 9.65E-01          | 0.56 | 9.05E-01         | 9.80E-01            | 14.0                           | 14.1             | 13.8           | 14.4           | 14.0               | 14.0          | 13.6           | 14.4           | 14.2            |
| 11                | Rv2495c     | MAP2307c    | 73         | Probable branched-chain keto acid dehydrogenase E2 compon                      | Rv2495c.1480     | 7.37E-01       | 9.57E-01          | 0.61 | 7.14E-01         | 9.59E-01            | 13.9                           | 13.9             | 13.6           | 14.2           | 13.9               | 14.0          | 13.6           | 14.3           | 14.0            |
| 12                | Rv3692      | MAP0359c    | 88         | Probable methanol dehydrogenase transcriptional regulatory p                   | Rv3692.2526      | 9.31E-01       | 9.82E-01          | 0.56 | 9.05E-01         | 9.80E-01            | 14.0                           | 14.0             | 13.5           | 14.5           | 13.7               | 14.0          | 13.7           | 14.3           | 13.9            |
| 13                | Rv3766      | MAP1313c    | 29         | Hypothetical protein                                                           | Rv3766.4196      | 2.77E-02       | 6.27E-01          | 0.83 | 1.67E-01         | 8.62E-01            | 13.7                           | 13.4             | 13.3           | 13.5           | 13.4               | 13.9          | 13.6           | 14.3           | 13.9            |
| 14                | Rv0396      | MAP0294c    | 46         | Hypothetical protein                                                           | Rv0396.2720      | 3.31E-02       | 6.27E-01          | 0.94 | 4.76E-02         | 7.98E-01            | 13.5                           | 12.9             | 12.6           | 13.2           | 12.7               | 13.9          | 13.2           | 14.5           | 13.5            |
| 15                | Rv0171      | MAP3606     | 79         | Mce-family protein Mce1C                                                       | Rv0171.3238      | 9.14E-01       | 9.81E-01          | 0.44 | 9.05E-01         | 9.80E-01            | 13.9                           | 13.9             | 13.2           | 14.6           | 13.9               | 13.9          | 13.3           | 14.4           | 14.0            |
| 16                | Rv0040c     | MAP0047c    | 78         | Secreted proline rich protein Mtc28 (proline rich 28 kDa anti                  | Rv0040c.1188     | 3.21E-02       | 6.27E-01          | 0.94 | 4.76E-02         | 7.98E-01            | 13.3                           | 12.2             | 11.4           | 13.0           | 12.1               | 13.8          | 13.2           | 14.5           | 14.0            |
| 17                | Rv2995c     | MAP3032c    | 88         | Probable 3-isopropylmalate dehydrogenase LeuB (beta-IPM de                     | Rv2995c.3959     | 7.87E-01       | 9.65E-01          | 0.50 | 1.00E+00         | 1.00E+00            | 13.8                           | 13.9             | 13.3           | 14.4           | 13.9               | 13.8          | 13.3           | 14.2           | 13.9            |
| 18                | Rv1166      | MAP2615c    | 83         | Probable conserved lipoprotein LpqW                                            | Rv1166.2863      | 6.43E-01       | 9.33E-01          | 0.56 | 9.05E-01         | 9.80E-01            | 13.7                           | 13.6             | 13.2           | 14.1           | 13.5               | 13.8          | 13.5           | 14.0           | 13.8            |
| 19                | Rv1004c     | MAP0210c    | 54         | Probable membrane protein                                                      | Rv1004c.613      | 3.81E-01       | 8.35E-01          | 0.39 | 7.14E-01         | 9.59E-01            | 13.9                           | 14.1             | 13.6           | 14.7           | 14.0               | 13.7          | 13.1           | 14.4           | 13.6            |
| 20                | Rv0388c     | MAP1515     | 64         | PPE family protein PPE9                                                        | Rv0388c.3900     | 1.74E-01       | 6.83E-01          | 0.72 | 3.81E-01         | 8.90E-01            | 13.6                           | 13.4             | 13.0           | 13.7           | 13.3               | 13.7          | 13.4           | 14.0           | 13.6            |
| 21                | Rv1343c     | MAP2418     | 82         | Probable conserved lipoprotein LprD                                            | Rv1343c.938      | 7.36E-02       | 6.48E-01          | 0.83 | 1.67E-01         | 8.62E-01            | 13.5                           | 13.0             | 12.9           | 13.1           | 13.1               | 13.7          | 13.1           | 14.3           | 13.7            |
| 22                | Rv3267      | MAP0191c    | 82         | Conserved protein (CP5A-related protein)                                       | Rv3267.821       | 1.38E-02       | 6.27E-01          | 1.00 | 2.38E-02         | 7.98E-01            | 13.6                           | 13.3             | 13.1           | 13.4           | 13.3               | 13.7          | 13.5           | 13.9           | 13.6            |
| 23                | Rv2435c     | MAP1279c    | 65         | Hypothetical protein                                                           | Rv2435c-sB.5f    | 2.45E-01       | 7.49E-01          | 0.22 | 2.62E-01         | 8.76E-01            | 13.9                           | 14.3             | 13.6           | 15.1           | 14.0               | 13.7          | 13.3           | 14.1           | 13.6            |
| 24                | Rv1323      | MAP2436c    | 91         | Probable acetyl-CoA acetyltransferase FadA4 (acetoacetyl-Co                    | Rv1323.2958      | 9.76E-02       | 6.48E-01          | 0.72 | 3.81E-01         | 8.90E-01            | 13.5                           | 13.1             | 13.0           | 13.3           | 13.2               | 13.7          | 13.1           | 14.3           | 13.7            |
| 25                | Rv3587c     | MAP0471     | 87         | Probable conserved membrane protein                                            | Rv3587c.3848     | 8.33E-02       | 6.48E-01          | 0.83 | 1.67E-01         | 8.62E-01            | 13.5                           | 13.3             | 13.1           | 13.4           | 13.3               | 13.7          | 13.3           | 14.0           | 13.8            |
| 26                | Rv3920c     | MAP4346c    | 93         | Conserved protein similar to jag protein                                       | Rv3920c.1872     | 6.00E-01       | 9.20E-01          | 0.50 | 1.00E+00         | 1.00E+00            | 13.6                           | 13.5             | 13.3           | 13.8           | 13.5               | 13.7          | 13.3           | 14.0           | 13.6            |
| 27                | Rv3757c     | MAP0146     | 74         | Possible osmoprotectant (glycine betaine/carnitine/choline/L- $\gamma$         | Rv3757c.3907     | 1.07E-01       | 6.48E-01          | 0.83 | 1.67E-01         | 8.62E-01            | 13.5                           | 13.1             | 12.8           | 13.5           | 13.0               | 13.7          | 13.3           | 14.0           | 13.8            |
| 28                | Rv0442c     | MAP3939c    | 72         | PPE family protein PPE10                                                       | Rv0442c.3421     | 8.90E-03       | 6.27E-01          | 0.94 | 4.76E-02         | 7.98E-01            | 13.4                           | 12.8             | 12.6           | 12.9           | 12.7               | 13.7          | 13.2           | 14.1           | 13.7            |
| 29                | Rv2056c     | MAP3768c    | 80         | 30S ribosomal protein S14 RpsN2                                                | Rv2056c.2133     | 3.01E-02       | 6.27E-01          | 0.94 | 4.76E-02         | 7.98E-01            | 13.3                           | 12.6             | 12.1           | 13.1           | 12.5               | 13.7          | 13.3           | 14.0           | 13.7            |
| 30                | Rv0809      | MAP0366     | 90         | Probable phosphoribosylformylglycinamide CYCLO-ligase Pur                      | Rv0809.350       | 2.34E-01       | 7.42E-01          | 0.28 | 3.81E-01         | 8.90E-01            | 13.7                           | 13.9             | 13.6           | 14.2           | 14.0               | 13.6          | 13.4           | 13.8           | 13.6            |
| 31                | Rv0313      | MAP3018     | 31         | hypothetical protein                                                           | Rv0313.3534      | 1.52E-01       | 6.83E-01          | 0.78 | 2.62E-01         | 8.76E-01            | 13.5                           | 13.2             | 12.8           | 13.5           | 13.3               | 13.6          | 13.2           | 14.0           | 13.4            |
| 32                | Rv3494c     | MAP0569     | 86         | Mce-family protein Mce4F                                                       | Rv3494c.2372     | 3.33E-01       | 8.11E-01          | 0.22 | 2.62E-01         | 8.76E-01            | 13.7                           | 14.0             | 13.3           | 14.7           | 13.9               | 13.6          | 13.4           | 13.8           | 13.6            |
| 33                | Rv3347c     | MAP2121c    | 61         | Hypothetical protein                                                           | Rv3347c-sB.11    | 7.17E-02       | 6.48E-01          | 0.83 | 1.67E-01         | 8.62E-01            | 13.4                           | 13.2             | 13.0           | 13.4           | 13.2               | 13.7          | 13.2           | 13.9           | 13.6            |
| 34                | Rv1363c     | MAP0751c    | 60         | Possible membrane protein                                                      | Rv1363c.3934     | 1.41E-01       | 6.83E-01          | 0.78 | 2.62E-01         | 8.76E-01            | 13.5                           | 13.3             | 13.1           | 13.5           | 13.4               | 13.6          | 13.4           | 13.8           | 13.5            |
| 35                | Rv3245c     | MAP3359c    | 88         | Two component sensory transduction histidine kinase MtrB                       | Rv3245c.3141     | 9.17E-02       | 6.48E-01          | 0.89 | 9.52E-02         | 7.98E-01            | 13.4                           | 12.9             | 12.5           | 13.4           | 12.8               | 13.6          | 13.2           | 14.0           | 13.5            |
| 36                | Rv2914c     | MAP1332     | 52         | Probable transmembrane serine/threonine-protein kinase I                       | Rv2914c.829      | 1.60E-01       | 6.83E-01          | 0.89 | 9.52E-02         | 7.98E-01            | 13.4                           | 13.1             | 12.6           | 13.5           | 13.2               | 13.6          | 13.3           | 13.8           | 13.6            |
| 37                | Rv0553      | MAP1382c    | 82         | Probable muconate cycloisomerase MncC (cis,cis-muconate                        | Rv0553.2813      | 3.83E-02       | 6.27E-01          | 0.83 | 1.67E-01         | 8.62E-01            | 13.3                           | 12.8             | 12.7           | 12.9           | 12.8               | 13.6          | 13.0           | 14.1           | 13.7            |
| 38                | Rv1368      | MAP1138c    | 30         | Probable conserved lipoprotein LprF                                            | Rv1368.4131      | 4.05E-01       | 8.35E-01          | 0.67 | 5.48E-01         | 9.11E-01            | 13.4                           | 13.2             | 12.4           | 13.9           | 13.0               | 13.6          | 13.3           | 13.8           | 13.7            |
| 39                | Rv3029c     | MAP3061c    | 92         | Probable electron transfer flavoprotein (beta-subunit) FixA                    | (be Rv3029c.1343 | 4.58E-01       | 8.44E-01          | 0.33 | 5.48E-01         | 9.11E-01            | 13.6                           | 13.7             | 13.5           | 13.9           | 13.7               | 13.6          | 13.3           | 13.8           | 13.4            |
| 40                | Rv1968      | MAP2114c    | 47         | Mce-family protein Mce3C                                                       | Rv1968.1514      | 2.16E-03       | 4.10E-01          | 1.00 | 2.38E-02         | 7.98E-01            | 13.4                           | 13.1             | 13.0           | 13.5           | 13.1               | 13.0          | 13.6           | 13.4           | 13.7            |
| 41                | Rv2207      | MAP1948     | 83         | Probable nicotinate-nucleotide-dimethylbenzimidazol phos                       | Rv2207.503       | 2.88E-01       | 7.74E-01          | 0.39 | 7.14E-01         | 9.59E-01            | 13.6                           | 13.8             | 13.7           | 14.0           | 13.9               | 13.5          | 13.1           | 14.0           | 13.6            |
| 42                | Rv2436      | MAP0299c    | 70         | Ribokinase RbsK                                                                | Rv2436.1059      | 6.37E-01       | 9.31E-01          | 0.61 | 7.14E-01         | 9.59E-01            | 13.5                           | 13.4             | 13.2           | 13.6           | 13.3               | 13.5          | 13.2           | 13.9           | 13.4            |
| 43                | Rv1718      | MAP0381     | 33         | hypothetical protein                                                           | Rv1718.1922      | 7.39E-01       | 9.57E-01          | 0.44 | 9.05E-01         | 9.80E-01            | 13.6                           | 13.6             | 13.2           | 14.0           | 13.7               | 13.5          | 13.2           | 13.8           | 13.5            |
| 44                | Rv2835c     | MAP1809c    | 33         | Probable Sn-glycerol-3-phosphate transport integral membran                    | Rv2835c.764      | 4.68E-02       | 6.27E-01          | 0.81 | 1.95E-01         | 8.76E-01            | 13.3                           | 13.0             | 12.8           | 13.2           | 13.0               | 13.5          | 13.2           | 13.9           | 13.6            |
| 45                | Rv3539      | MAP3939c    | 60         | PPE family protein PPE63                                                       | Rv3539.636       | 1.26E-01       | 6.73E-01          | 0.78 | 2.62E-01         | 8.76E-01            | 13.4                           | 13.0             | 12.9           | 13.2           | 13.0               | 13.5          | 13.0           | 14.0           | 13.5            |
| 46                | Rv2176      | MAP1914     | 73         | Probable transmembrane serine/threonine-protein kinase L Pk                    | Rv2176.3992      | 1.58E-01       | 6.83E-01          | 0.78 | 2.62E-01         | 8.76E-01            | 13.4                           | 13.2             | 13.0           | 13.4           | 13.2               | 13.5          | 13.2           | 13.8           | 13.5            |
| 47                | Rv0621      | MAP2026     | 56         | Possible membrane protein                                                      | Rv0621.2227      | 2.57E-01       | 7.62E-01          | 0.72 | 3.81E-01         | 8.90E-01            | 13.4                           | 13.1             | 12.8           | 13.5           | 13.2               | 13.5          | 13.1           | 13.9           | 13.4            |
| 48                | Rv3811      | MAP0209c    | 77         | hypothetical protein                                                           | Rv3811.839       | 4.51E-02       | 6.27E-01          | 1.00 | 2.38E-02         | 7.98E-01            | 13.2                           | 12.7             | 12.3           | 13.1           | 12.9               | 13.5          | 13.2           | 13.7           | 13.4            |
| 49                | Rv3413c     | MAP4276     | 59         | Unknown alanine and proline rich protein                                       | Rv3413c.2208     | 2.87E-01       | 7.74E-01          | 0.72 | 3.81E-01         | 8.90E-01            | 13.3                           | 12.9             | 12.0           | 13.7           | 12.6               | 13.6          | 13.3           | 13.7           | 13.4            |
| 50                | Rv1217c     | MAP2561     | 76         | Probable tetraodonin-transport integral membrane protein ABC                   | Rv1217c.2562     | 3.79E-02       | 6.27E-01          | 0.89 | 9.52E-02         | 7.98E-01            | 13.3                           | 13.0             | 12.8           | 13.3           | 13.1               | 13.5          | 13.3           | 13.6           | 13.5            |
| 51                | Rv2500c     | MAP2312c    | 90         | Possible acyl-CoA dehydrogenase FadE19 (MMGC)                                  | Rv2500c.640      | 7.28E-02       | 6.48E-01          | 0.83 | 1.67E-01         | 8.62E-01            | 13.3                           | 13.0             | 12.9           | 13.1           | 13.0               | 13.5          | 13.1           | 13.9           | 13.4            |
| 52                | Rv3005c     | MAP2663c    | 70         | hypothetical protein                                                           | Rv3005c.2773     | 4.27E-01       | 8.35E-01          | 0.61 | 7.14E-01         | 9.59E-01            | 13.4                           | 13.2             | 12.9           | 13.6           | 13.2               | 13.5          | 13.0           | 13.9           | 13.5            |
| 53                | Rv3604c     | MAP0454     | 54         | Probable conserved transmembrane protein rich in alanine                       | ancRv3604c.3266  | 3.88E-02       | 6.27E-01          | 0.83 | 1.67E-01         | 8.62E-01            | 13.3                           | 13.0             | 12.8           | 13.1           | 12.9               | 13.5          | 13.1           | 13.8           | 13.5            |
| 54                | Rv2423      | MAP1673c    | 58         | Hypothetical protein                                                           | Rv2423.781       | 1.12E-01       | 6.48E-01          | 0.83 | 1.67E-01         | 8.62E-01            | 13.3                           | 12.9             | 12.5           | 13.2           | 12.9               | 13.4          | 12.9           | 14.0           | 13.5            |
| 55                | Rv1272c     | MAP2500     | 79         | Probable drugs-transport transmembrane ATP-binding protein                     | Rv1272c.3435     | 5.28E-01       | 8.97E-01          | 0.67 | 5.48E-01         | 9.11E-01            | 13.4                           | 13.2             | 12.6           | 13.8           | 13.2               | 13.4          | 13.2           | 13.7           | 13.4            |
| 56                | Rv2903c     | MAP2971c    | 72         | Probable signal peptidase I LepB (SPASE II) (leader peptidase                  | I) Rv2903c.1924  | 2.64E-01       | 7.62E-01          | 0.17 | 1.67E-01         | 8.62E-01            | 13.5                           | 13.7             | 13.5           | 13.9           | 13.7               | 13.4          | 13.1           | 13.8           | 13.3            |
| 57                | Rv1634      | MAP1336     | 69         | Possible drug efflux membrane protein                                          | Rv1634.234       | 3.00E-01       | 7.74E-01          | 0.78 | 2.62E-01         | 8                   |                                |                  |                |                |                    |               |                |                |                 |



## Table S3 continued

|     |         |          |    |                                                                  |               |          |          |          |          |          |      |      |      |      |      |      |      |      |      |
|-----|---------|----------|----|------------------------------------------------------------------|---------------|----------|----------|----------|----------|----------|------|------|------|------|------|------|------|------|------|
| 69  | Rv3330  | MAP3448  | 82 | Probable penicillin-binding protein DacB1 (D-alanyl-D-alanine c  | Rv3330.29     | 3.60E-01 | 8.25E-01 | 0.44     | 9.05E-01 | 9.80E-01 | 13.5 | 13.7 | 13.4 | 14.0 | 13.7 | 13.4 | 13.0 | 13.8 | 13.4 |
| 70  | Rv3148  | MAP3204  | 90 | Probable NADH dehydrogenase I (chain D) NuoD (NADH-ubiqui        | Rv3148.2829   | 2.51E-01 | 7.60E-01 | 0.67     | 5.48E-01 | 9.11E-01 | 13.3 | 13.1 | 12.9 | 13.4 | 13.2 | 13.4 | 13.1 | 13.7 | 13.3 |
| 71  | Rv3289c | MAP3409c | 67 | Possible transmembrane protein                                   | Rv3289c.2424  | 1.59E-01 | 6.83E-01 | 0.72     | 3.81E-01 | 8.90E-01 | 13.3 | 13.0 | 12.7 | 13.3 | 12.8 | 13.4 | 13.0 | 13.8 | 13.4 |
| 72  | Rv3279c | MAP3397c | 70 | Possible bifunctional protein BirA: biotin operon repressor + bi | Rv3279c.1921  | 2.41E-01 | 7.47E-01 | 0.72     | 3.81E-01 | 8.90E-01 | 13.3 | 13.0 | 12.8 | 13.1 | 13.0 | 13.4 | 12.8 | 14.0 | 13.5 |
| 73  | Rv0550c | MAP3394c | 39 | Possible antitoxin VapB3                                         | Rv0550c.3862  | 5.09E-01 | 8.89E-01 | 0.44     | 9.05E-01 | 9.80E-01 | 13.4 | 13.5 | 13.2 | 13.9 | 13.4 | 13.4 | 13.1 | 13.7 | 13.5 |
| 74  | Rv3505  | MAP2588  | 85 | Probable acyl-CoA dehydrogenase FadE27                           | Rv3505.3530   | 2.34E-01 | 7.42E-01 | 0.72     | 3.81E-01 | 8.90E-01 | 13.3 | 13.0 | 13.0 | 13.1 | 13.1 | 13.4 | 12.9 | 13.8 | 13.5 |
| 75  | Rv1171  | MAP2612c | 67 | hypothetical protein                                             | Rv1171.4179   | 2.73E-01 | 7.74E-01 | 0.67     | 5.48E-01 | 9.11E-01 | 13.3 | 13.2 | 13.1 | 13.2 | 13.2 | 13.4 | 13.0 | 13.7 | 13.4 |
| 76  | Rv2846c | MAP1868c | 88 | Possible integral membrane efflux protein EfpA                   | Rv2846c.2862  | 2.07E-01 | 7.15E-01 | 0.72     | 3.81E-01 | 8.90E-01 | 13.2 | 12.9 | 12.7 | 13.2 | 12.9 | 13.4 | 12.8 | 13.9 | 13.3 |
| 77  | Rv1963c | MAP0116  | 30 | Probable transcriptional repressor (probably TetR-family) Mce:   | Rv1963c.813   | 8.46E-01 | 9.70E-01 | 0.39     | 7.14E-01 | 9.59E-01 | 13.4 | 13.4 | 12.9 | 14.0 | 13.2 | 13.4 | 12.9 | 13.9 | 13.4 |
| 78  | Rv3483c | MAP2522  | 32 | Possible exported protein                                        | Rv3483c.4483  | 9.42E-01 | 9.82E-01 | 0.44     | 9.05E-01 | 9.80E-01 | 13.4 | 13.4 | 13.0 | 13.8 | 13.2 | 13.4 | 12.8 | 13.9 | 13.2 |
| 79  | Rv2345  | MAP2133  | 70 | hypothetical protein                                             | Rv2345.1147   | 9.74E-01 | 9.89E-01 | 0.50     | 1.00E+00 | 1.00E+00 | 13.4 | 13.4 | 13.0 | 13.8 | 13.2 | 13.4 | 13.0 | 13.7 | 13.4 |
| 80  | Rv1145  | MAP4124  | 79 | Probable conserved transmembrane transport protein MmpL1         | Rv1145.1926   | 2.46E-02 | 6.27E-01 | 0.94     | 4.76E-02 | 7.98E-01 | 13.1 | 12.6 | 12.3 | 12.9 | 12.7 | 13.4 | 13.0 | 13.7 | 13.4 |
| 81  | Rv2051c | MAP1799c | 69 | hypothetical protein                                             | Rv2051c-sB.85 | 2.82E-02 | 6.27E-01 | 0.83     | 1.67E-01 | 8.62E-01 | 13.1 | 12.7 | 12.5 | 13.0 | 12.8 | 13.4 | 13.0 | 13.7 | 13.5 |
| 82  | Rv1733c | MAP1301  | 29 | Probable conserved transmembrane protein                         | Rv1733c.3513  | 5.01E-02 | 6.27E-01 | 0.89     | 9.52E-02 | 7.98E-01 | 13.2 | 12.8 | 12.5 | 13.1 | 12.8 | 13.3 | 13.1 | 13.6 | 13.4 |
| 83  | Rv0362  | MAP2500  | 25 | Possible Mg2+ transport transmembrane protein MgtE               | Rv0362.3418   | 6.61E-02 | 6.48E-01 | 0.89     | 9.52E-02 | 7.98E-01 | 13.2 | 12.8 | 12.5 | 13.0 | 12.6 | 13.3 | 12.9 | 13.8 | 13.3 |
| 84  | Rv1068c | MAP4144  | 48 | PE-PGRS family protein PE_PGRS20                                 | Rv1068c.528   | 7.75E-01 | 9.65E-01 | 0.67     | 5.48E-01 | 9.11E-01 | 13.3 | 13.2 | 12.3 | 14.1 | 12.9 | 13.3 | 13.1 | 13.6 | 13.3 |
| 85  | Rv0234c | MAP3673c | 86 | Succinate-semialdehyde dehydrogenase [NADP+] dependent (f        | Rv0234c.831   | 4.36E-01 | 8.38E-01 | 0.78     | 2.62E-01 | 8.76E-01 | 13.2 | 12.9 | 12.1 | 13.7 | 13.3 | 13.3 | 13.0 | 13.6 | 13.5 |
| 86  | Rv1234  | MAP2549c | 91 | Probable transmembrane protein                                   | Rv1234.1292   | 8.90E-01 | 9.77E-01 | 0.50     | 1.00E+00 | 1.00E+00 | 13.3 | 13.3 | 12.8 | 13.8 | 13.5 | 13.3 | 13.0 | 13.7 | 13.4 |
| 87  | Rv0341  | MAP2079  | 25 | isoniazid inducible gene protein IniB                            | Rv0341.1403   | 1.24E-01 | 6.73E-01 | 0.11     | 9.52E-02 | 7.98E-01 | 13.5 | 13.8 | 13.4 | 14.2 | 13.8 | 13.3 | 13.1 | 13.6 | 13.2 |
| 88  | Rv0931c | MAP3387c | 67 | Transmembrane serine/threonine-protein kinase D PknD (prot       | Rv0931c.4303  | 8.36E-01 | 9.70E-01 | 0.56     | 9.05E-01 | 9.80E-01 | 13.3 | 13.4 | 13.1 | 13.5 | 13.3 | 13.3 | 13.0 | 13.7 | 13.3 |
| 89  | Rv0227c | MAP3666c | 80 | Probable conserved membrane protein                              | Rv0227c.2110  | 3.40E-01 | 8.15E-01 | 0.67     | 5.48E-01 | 9.11E-01 | 13.2 | 13.0 | 12.8 | 13.3 | 13.0 | 13.3 | 12.9 | 13.8 | 13.2 |
| 90  | Rv1918c | MAP3939c | 58 | PPE family protein PPE35                                         | Rv1918c.367   | 1.84E-01 | 6.88E-01 | 0.67     | 5.48E-01 | 9.11E-01 | 13.2 | 13.1 | 13.0 | 13.1 | 13.1 | 13.3 | 13.0 | 13.6 | 13.4 |
| 91  | Rv2192c | MAP1931c | 85 | Probable anthranilate phosphoribosyltransferase TrpD             | Rv2192c.4133  | 7.29E-01 | 9.56E-01 | 0.44     | 9.05E-01 | 9.80E-01 | 13.4 | 13.4 | 12.9 | 14.0 | 13.3 | 13.3 | 13.0 | 13.6 | 13.4 |
| 92  | Rv0187  | MAP3627  | 74 | Probable O-methyltransferase                                     | Rv0187.620    | 6.86E-02 | 6.48E-01 | 0.78     | 2.62E-01 | 8.76E-01 | 13.1 | 12.8 | 12.6 | 13.0 | 12.9 | 13.3 | 12.9 | 13.8 | 13.2 |
| 93  | Rv3150  | MAP0738c | 90 | Probable NADH dehydrogenase I (chain F) NuoF (NADH-ubiqui        | Rv3150.517    | 8.41E-01 | 9.70E-01 | 0.50     | 1.00E+00 | 1.00E+00 | 13.3 | 13.2 | 12.9 | 13.6 | 13.3 | 13.3 | 12.7 | 13.9 | 13.3 |
| 94  | Rv0583c | MAP4075c | 62 | Probable conserved lipoprotein LpqN                              | Rv0583c.1889  | 6.85E-01 | 9.46E-01 | 0.67     | 5.48E-01 | 9.11E-01 | 13.2 | 13.1 | 12.3 | 13.9 | 12.7 | 13.3 | 13.1 | 13.5 | 13.3 |
| 95  | Rv0391  | MAP0282c | 91 | Probable O-succinylhomoserine sulphydrylase MetzZ (OSH sulfh     | Rv0391.524    | 3.41E-01 | 8.15E-01 | 0.67     | 5.48E-01 | 9.11E-01 | 13.2 | 12.9 | 12.6 | 13.3 | 12.8 | 13.3 | 12.7 | 13.9 | 13.6 |
| 96  | Rv0912  | MAP0846  | 74 | Probable conserved transmembrane protein                         | Rv0912.939    | 1.36E-01 | 6.83E-01 | 0.72     | 3.81E-01 | 8.90E-01 | 13.2 | 12.9 | 12.8 | 13.1 | 13.0 | 13.3 | 12.9 | 13.7 | 13.4 |
| 97  | Rv3747  | MAP2626  | 35 | hypothetical protein                                             | Rv3747.1852   | 2.56E-01 | 7.62E-01 | 0.67     | 5.48E-01 | 9.11E-01 | 13.0 | 12.6 | 11.8 | 13.3 | 12.4 | 13.3 | 12.4 | 14.2 | 13.1 |
| 98  | Rv0191  | MAP0963c | 76 | Probable conserved integral membrane protein                     | Rv0191.236    | 1.01E-01 | 6.48E-01 | 0.83     | 1.67E-01 | 8.62E-01 | 13.1 | 12.6 | 12.1 | 13.1 | 12.5 | 13.3 | 12.9 | 13.6 | 13.3 |
| 99  | Rv3271c | MAP2784  | 29 | Probable conserved integral membrane protein                     | Rv3271c.3333  | 4.38E-01 | 8.38E-01 | 0.67     | 5.48E-01 | 9.11E-01 | 13.2 | 13.0 | 12.7 | 13.4 | 13.2 | 13.3 | 12.8 | 13.8 | 13.2 |
| 100 | Rv2996c | MAP0129  | 89 | Probable D-3-phosphoglycerate dehydrogenase SerA1 (PGDH)         | Rv2996c.4596  | 6.01E-01 | 9.20E-01 | 0.61     | 7.14E-01 | 9.59E-01 | 13.2 | 13.1 | 12.7 | 13.5 | 13.3 | 13.3 | 12.9 | 13.6 | 13.4 |
| 101 | Rv0684  | MAP4142  | 91 | Probable elongation factor G Fusa1 (EF-G)                        | Rv0684.552    | 8.96E-01 | 9.77E-01 | 0.61     | 7.14E-01 | 9.59E-01 | 13.3 | 13.2 | 12.4 | 14.1 | 13.0 | 13.3 | 13.0 | 13.6 | 13.4 |
| 102 | Rv1539  | MAP1250  | 81 | Probable lipoprotein signal peptidase LspA                       | Rv1539.3910   | 4.94E-01 | 8.80E-01 | 0.61     | 7.14E-01 | 9.59E-01 | 13.2 | 13.0 | 12.5 | 13.4 | 13.1 | 13.3 | 12.6 | 14.0 | 13.0 |
| 103 | Rv3507  | MAP4144  | 55 | PE-PGRS family protein PE_PGRS53                                 | Rv3507-s1.25  | 4.19E-01 | 8.35E-01 | 0.33     | 5.48E-01 | 9.11E-01 | 13.4 | 13.5 | 13.3 | 13.8 | 13.6 | 13.3 | 12.7 | 13.8 | 13.1 |
| 104 | Rv0014c | MAP016c  | 86 | Transmembrane serine/threonine-protein kinase B PknB (prot       | Rv0014c.4591  | 8.73E-01 | 9.70E-01 | 0.56     | 9.05E-01 | 9.80E-01 | 13.3 | 13.4 | 12.4 | 14.3 | 12.9 | 13.3 | 12.9 | 13.6 | 13.3 |
| 105 | Rv0400c | MAP3878c | 87 | Acyl-CoA dehydrogenase FadE7                                     | Rv0400c.357   | 5.66E-01 | 9.02E-01 | 0.72     | 3.81E-01 | 8.90E-01 | 13.2 | 13.2 | 13.0 | 13.4 | 13.1 | 13.3 | 13.0 | 13.6 | 13.3 |
| 106 | Rv1435c | MAP3811  | 56 | Probable conserved proline, glycine, valine-rich secreted prote  | Rv1435c.3507  | 7.08E-01 | 9.54E-01 | 0.44     | 9.05E-01 | 9.80E-01 | 13.2 | 13.2 | 12.9 | 13.5 | 13.1 | 13.3 | 13.0 | 13.6 | 13.2 |
| 107 | Rv0072  | MAP2126  | 46 | Probable glutamine-transport transmembrane protein ABC tra       | Rv0072.3666   | 4.46E-01 | 8.42E-01 | 0.28     | 3.81E-01 | 8.90E-01 | 13.3 | 13.5 | 13.2 | 13.8 | 13.4 | 13.3 | 12.9 | 13.7 | 13.2 |
| 108 | Rv0217c | MAP1735  | 73 | Possible esterase LipW                                           | Rv0217c.4238  | 1.13E-01 | 6.48E-01 | 0.72     | 3.81E-01 | 8.90E-01 | 13.2 | 13.0 | 12.8 | 13.1 | 12.9 | 13.3 | 13.0 | 13.5 | 13.4 |
| 109 | Rv3794  | MAP0229c | 82 | Integral membrane indolylacetyltransferase Rv3794.84             | 3.05E-02      | 6.27E-01 | 0.89     | 9.52E-02 | 7.98E-01 | 13.0     | 12.6 | 12.3 | 12.9 | 12.7 | 13.3 | 12.9 | 13.6 | 13.3 |      |
| 110 | Rv2552c | MAP1080  | 82 | Probable shikimate 5-dehydrogenase AroE (5-dehydroshikimat       | Rv2552c.4523  | 5.56E-01 | 8.97E-01 | 0.72     | 3.81E-01 | 8.90E-01 | 13.2 | 13.1 | 12.7 | 13.4 | 13.2 | 13.3 | 12.8 | 13.8 | 13.3 |
| 111 | Rv1592c | MAP1286c | 79 | hypothetical protein                                             | Rv1592c.806   | 2.10E-01 | 7.15E-01 | 0.72     | 3.81E-01 | 8.90E-01 | 13.1 | 12.8 | 12.5 | 13.2 | 12.8 | 13.3 | 12.8 | 13.7 | 13.2 |
| 112 | Rv2264c | MAP0254c | 62 | hypothetical protein                                             | Rv2264c.570   | 8.80E-01 | 9.73E-01 | 0.50     | 1.00E+00 | 1.00E+00 | 13.2 | 13.2 | 12.4 | 14.0 | 13.3 | 13.3 | 12.9 | 13.6 | 13.4 |
| 113 | Rv1672c | MAP2534c | 26 | Probable conserved integral membrane transport protein           | Rv1672c.511   | 3.05E-01 | 7.74E-01 | 0.67     | 5.48E-01 | 9.11E-01 | 13.1 | 12.7 | 12.0 | 13.4 | 12.8 | 13.3 | 12.7 | 13.8 | 13.3 |
| 114 | Rv0777  | MAP0611  | 88 | Probable adenylosuccinate lyase PurB (adenylosuccinase) (ASL     | Rv0777.812    | 1.10E-01 | 6.48E-01 | 0.72     | 3.81E-01 | 8.90E-01 | 13.1 | 12.8 | 12.7 | 12.9 | 12.8 | 13.3 | 12.8 | 13.7 | 13.4 |
| 115 | Rv2782c | MAP2890c | 84 | Probable zinc protease PepR                                      | Rv2782c.4274  | 3.98E-02 | 6.27E-01 | 0.83     | 1.67E-01 | 8.62E-01 | 13.1 | 12.8 | 12.7 | 12.8 | 12.8 | 13.3 | 12.9 | 13.6 | 13.4 |
| 116 | Rv3023c | MAP3759  | 46 | Probable transposase                                             | Rv3023c.2838  | 5.79E-01 | 9.08E-01 | 0.61     | 7.14E-01 | 9.59E-01 | 13.2 | 12.9 | 12.1 | 13.8 | 12.7 | 13.3 | 12.9 | 13.6 | 13.4 |
| 117 | Rv2446c | MAP2269c | 80 | Probable conserved integral membrane protein                     | Rv2446c.4373  | 6.82E-01 | 9.46E-01 | 0.67     | 5.48E-01 | 9.11E-01 | 13.2 | 13.2 | 12.8 | 13.5 | 13.3 | 13.3 | 12.9 | 13.6 | 13.2 |
| 118 | Rv3573c | MAP0492  | 81 | Probable acyl-CoA dehydrogenase FadE34                           | Rv3573c.661   | 3.04E-01 | 7.74E-01 | 0.67     | 5.48E-01 | 9.11E-01 | 13.1 | 12.9 | 12.6 | 13.2 | 12.8 | 13.3 | 12.8 | 13.7 | 13.3 |
| 119 | Rv1679  | MAP1085  | 28 | Possible acyl-CoA dehydrogenase FadE16                           | Rv1679.934    | 4.80E-01 | 8.69E-01 | 0.61     | 7.14E-01 | 9.59E-01 | 13.2 | 13.1 | 12.8 | 13.4 | 13.0 | 13.2 | 13.0 | 13.5 | 13.3 |
| 120 | Rv1305  | MAP2456c | 90 | Probable ATP synthase C chain AtpE (lipid-binding protein) (dic  | Rv1305.3794   | 7.61E-02 | 6.48E-01 | 0.89     | 9.52E-02 | 7.98E-01 | 13.0 | 12.5 | 11.9 | 13.0 | 12.6 | 13.2 | 12.8 | 13.6 | 13.4 |
| 121 | Rv2048c | MAP0931  | 81 | Polyketide synthase Pks12                                        | Rv2048c-s4.28 | 1.52E-01 | 6.83E-01 | 0.89     | 9.52E-02 | 7.98E-01 | 13.1 | 12.8 | 12.4 | 13.2 | 12.9 | 13.2 | 13.0 | 13.5 | 13.3 |
| 122 | Rv3115  | MAP3759c | 46 | Probable transposase                                             | Rv3115.3127   | 2.65E-01 | 7.62E-01 | 0.83     | 1.67E-01 | 8.62E-01 | 13.1 | 12.7 | 12.1 | 13.4 | 12.6 | 13.2 | 12.9 | 13.6 | 13.4 |
| 123 | Rv3008  | MAP2446c | 38 | Hypothetical protein                                             | Rv3008.4209   | 1.15E-01 | 6.48E-01 | 0.78     | 2.62E-01 | 8.76E-01 | 13.1 | 12.8 | 12.6 | 13.1 | 12.8 | 13.2 | 12.9 | 13.5 | 13.4 |
| 124 | Rv1925  | MAP1647  | 75 | Probable acyl-CoA ligase FadD31 (acyl-CoA synthetase) (acyl-Co   | Rv1925.4129   | 7.07E-02 | 6.48E-01 | 0.89     | 9.52E-02 | 7.98E-01 | 13.0 | 12.5 | 12.1 | 13.0 | 12.4 | 13.2 | 12.9 | 13.5 | 13.4 |
| 125 | Rv1449c | MAP1178c | 87 | Transketolase Tkt (TK)                                           | Rv1449c.1124  | 9.99E-02 | 6.48E-01 | 0.89     | 9.52E-02 | 7.98E-01 | 13.9 | 12.4 | 11.7 | 13.0 | 12.4 | 13.2 | 12.9 | 13.6 | 13.3 |
| 126 | Rv0330c | MAP3575  | 35 | Hypothetical protein                                             | Rv0330c.167   | 1.31E-01 | 6.83E-01 | 0.89     | 9.52E-02 |          |      |      |      |      |      |      |      |      |      |

Table S3 continued

|     |         |          |    |                                                                |               |          |          |      |          |          |      |      |      |      |      |      |      |      |      |
|-----|---------|----------|----|----------------------------------------------------------------|---------------|----------|----------|------|----------|----------|------|------|------|------|------|------|------|------|------|
| 140 | Rv2164c | MAP1904c | 77 | Probable conserved proline rich membrane protein               | Rv2164c.3850  | 6.00E-01 | 9.20E-01 | 0.39 | 7.14E-01 | 9.59E-01 | 13.3 | 13.4 | 12.7 | 14.1 | 13.3 | 13.2 | 13.0 | 13.4 | 13.1 |
| 141 | Rv2487c | MAP4144  | 60 | PE-PGRS family protein PE_PGRS42                               | Rv2487c.83    | 8.16E-01 | 9.65E-01 | 0.50 | 1.00E+00 | 1.00E+00 | 13.2 | 13.3 | 12.6 | 14.0 | 13.2 | 13.2 | 12.8 | 13.6 | 13.0 |
| 142 | Rv1293  | MAP0986c | 86 | Diaminopimelate decarboxylase LysA (DAP decarboxylase)         | Rv1293.4278   | 1.44E-01 | 6.83E-01 | 0.72 | 3.81E-01 | 8.90E-01 | 13.1 | 12.8 | 12.8 | 13.0 | 12.7 | 13.2 | 12.8 | 13.6 | 13.2 |
| 143 | Rv1364c | MAP0130  | 76 | Possible sigma factor regulatory protein                       | Rv1364c.834   | 3.84E-01 | 8.35E-01 | 0.72 | 3.81E-01 | 8.90E-01 | 13.1 | 12.9 | 12.5 | 13.3 | 13.0 | 13.2 | 12.8 | 13.6 | 13.4 |
| 144 | Rv2100  | MAP4176  | 43 | hypothetical protein                                           | Rv2100.1189   | 3.38E-01 | 8.15E-01 | 0.67 | 5.48E-01 | 9.11E-01 | 13.1 | 12.8 | 12.4 | 13.2 | 12.9 | 13.2 | 12.6 | 13.8 | 13.0 |
| 145 | Rv1047  | MAP3759c | 46 | Probable transposase                                           | Rv1047.4283   | 7.32E-01 | 9.56E-01 | 0.56 | 9.05E-01 | 9.80E-01 | 13.1 | 13.0 | 12.1 | 13.9 | 12.9 | 13.2 | 12.8 | 13.5 | 13.3 |
| 146 | Rv3566c | MAP0501  | 68 | Arylamine N-acetyltransferase Nat (arylamine acetylase)        | Rv3566c.374   | 6.07E-02 | 6.48E-01 | 0.89 | 9.52E-02 | 7.98E-01 | 13.0 | 12.8 | 12.5 | 13.0 | 12.8 | 13.2 | 12.9 | 13.4 | 13.2 |
| 147 | Rv2685  | MAP3793  | 71 | Probable arsenic-transport integral membrane protein ArsB1     | Rv2685.1093   | 1.94E-01 | 6.98E-01 | 0.78 | 2.62E-01 | 8.76E-01 | 13.0 | 12.7 | 12.2 | 13.2 | 12.5 | 13.2 | 12.7 | 13.7 | 13.3 |
| 148 | Rv0364  | MAP0370  | 84 | Possible conserved transmembrane protein                       | Rv0364.1883   | 6.58E-01 | 9.36E-01 | 0.50 | 1.00E+00 | 1.00E+00 | 13.2 | 13.1 | 12.9 | 13.2 | 13.1 | 13.2 | 12.8 | 13.5 | 13.1 |
| 149 | Rv3307  | MAP3429  | 82 | Probable purine nucleoside phosphorylase DeoD (inosine phospho | Rv3307.3656   | 1.16E-01 | 6.48E-01 | 0.17 | 1.67E-01 | 8.62E-01 | 13.3 | 13.6 | 13.4 | 13.9 | 13.5 | 13.2 | 12.8 | 13.6 | 13.1 |
| 150 | Rv3090  | MAP0462  | 38 | Unknown alanine and valine rich protein                        | Rv3090.479    | 6.31E-01 | 9.31E-01 | 0.61 | 7.14E-01 | 9.59E-01 | 13.1 | 13.0 | 12.3 | 13.5 | 13.2 | 12.8 | 13.6 | 13.2 | 13.2 |
| 151 | Rv2962c | MAP2851c | 30 | Possible glycosyl transferase                                  | Rv2962c.3128  | 1.08E-02 | 6.27E-01 | 1.00 | 2.38E-02 | 7.98E-01 | 12.9 | 12.3 | 12.0 | 12.7 | 12.4 | 13.2 | 12.9 | 13.4 | 13.3 |
| 152 | Rv3629c | MAP0434  | 75 | Probable conserved integral membrane protein                   | Rv3629c.2527  | 2.36E-02 | 6.27E-01 | 0.94 | 4.76E-02 | 7.98E-01 | 13.0 | 12.7 | 12.5 | 12.9 | 12.7 | 13.2 | 12.9 | 13.4 | 13.1 |
| 153 | Rv3525c | MAP0540  | 83 | Possible siderophore-binding protein                           | Rv3525c.3315  | 3.04E-01 | 7.74E-01 | 0.56 | 9.05E-01 | 9.80E-01 | 13.1 | 12.9 | 12.8 | 13.0 | 13.0 | 13.2 | 12.8 | 13.6 | 13.1 |
| 154 | Rv2286c | MAP2286c | 30 | hypothetical protein                                           | Rv2286c.4202  | 7.66E-01 | 9.65E-01 | 0.67 | 5.48E-01 | 9.11E-01 | 13.1 | 13.0 | 12.0 | 14.0 | 12.6 | 13.2 | 12.6 | 13.7 | 13.0 |
| 155 | Rv1254  | MAP0616c | 79 | Probable acyltransferase                                       | Rv1254.1090   | 3.09E-01 | 7.75E-01 | 0.67 | 5.48E-01 | 9.11E-01 | 13.1 | 12.9 | 12.7 | 13.1 | 12.8 | 13.2 | 12.7 | 13.6 | 13.3 |
| 156 | Rv0899  | MAP1680c | 33 | Outer membrane protein A OmpA                                  | Rv0899.1537   | 8.14E-01 | 9.65E-01 | 0.39 | 7.14E-01 | 9.59E-01 | 13.2 | 13.3 | 12.3 | 14.4 | 13.8 | 13.2 | 12.7 | 13.7 | 13.3 |
| 157 | Rv3502c | MAP0561  | 82 | Probable short-chain type dehydrogenase/reductase Possible     | Rv3502c.1062  | 3.32E-01 | 8.11E-01 | 0.44 | 9.05E-01 | 9.80E-01 | 13.2 | 13.4 | 13.3 | 13.4 | 13.4 | 13.2 | 12.8 | 13.5 | 13.2 |
| 158 | Rv2064  | MAP1810  | 74 | Precorrin-3B synthase CobG                                     | Rv2064.3844   | 2.25E-01 | 7.31E-01 | 0.72 | 3.81E-01 | 8.90E-01 | 13.1 | 12.9 | 12.6 | 13.1 | 13.0 | 13.2 | 12.8 | 13.5 | 13.1 |
| 159 | Rv2292c | MAP3661c | 30 | Hypothetical protein                                           | Rv2292c.1541  | 8.00E-01 | 9.65E-01 | 0.44 | 9.05E-01 | 9.80E-01 | 13.1 | 13.1 | 12.6 | 13.5 | 13.3 | 13.2 | 12.9 | 13.5 | 13.1 |
| 160 | Rv0304  | MAP0210c | 37 | hypothetical protein                                           | Rv0304-s1.34  | 7.74E-01 | 9.65E-01 | 0.44 | 9.05E-01 | 9.80E-01 | 13.2 | 13.3 | 12.7 | 13.8 | 13.0 | 13.2 | 12.8 | 13.5 | 13.3 |
| 161 | Rv2262c | MAP3280c | 27 | hypothetical protein                                           | Rv2262c.4370  | 4.46E-01 | 8.42E-01 | 0.72 | 3.81E-01 | 8.90E-01 | 13.1 | 12.9 | 12.4 | 13.3 | 13.0 | 13.2 | 12.6 | 13.7 | 13.4 |
| 162 | Rv1031  | MAP0227c | 46 | Probable potassium-transporting ATPase C chain KdpC (potassi   | Rv1031.1005   | 3.54E-01 | 8.22E-01 | 0.78 | 2.62E-01 | 8.76E-01 | 13.0 | 12.8 | 12.4 | 13.3 | 12.8 | 13.2 | 12.8 | 13.5 | 13.3 |
| 163 | Rv0872c | MAP4144  | 62 | PE-PGRS family protein PE_PGRS15                               | Rv0872c.1408  | 4.05E-02 | 6.27E-01 | 0.89 | 9.52E-02 | 7.98E-01 | 13.0 | 12.6 | 12.4 | 12.9 | 12.7 | 13.2 | 12.8 | 13.5 | 13.2 |
| 164 | Rv1493  | MAP0673  | 91 | Probable methylmalonyl-CoA mutase large subunit MutB (MCM      | Rv1493.3443   | 7.15E-01 | 9.56E-01 | 0.56 | 9.05E-01 | 9.80E-01 | 13.1 | 13.1 | 13.0 | 13.1 | 13.1 | 13.1 | 12.8 | 13.5 | 13.1 |
| 165 | Rv0258c | MAP3704c | 84 | hypothetical protein                                           | Rv0258c.3897  | 2.46E-01 | 7.49E-01 | 0.72 | 3.81E-01 | 8.90E-01 | 13.0 | 12.7 | 12.1 | 13.2 | 12.5 | 13.1 | 12.7 | 13.6 | 13.2 |
| 166 | Rv0730  | MAP4196  | 81 | GCNS-related N-acetyltransferase                               | Rv0730.4213   | 2.39E-01 | 7.47E-01 | 0.78 | 2.62E-01 | 8.76E-01 | 13.0 | 12.7 | 12.2 | 13.1 | 12.4 | 13.1 | 12.6 | 13.7 | 13.3 |
| 167 | Rv0085  | MAP1526  | 37 | Possible hydrogenase HycP                                      | Rv0085.165    | 5.24E-02 | 6.27E-01 | 0.83 | 1.67E-01 | 8.62E-01 | 13.0 | 12.6 | 12.3 | 12.9 | 12.6 | 13.1 | 12.8 | 13.5 | 13.3 |
| 168 | Rv0383c | MAP3855  | 85 | Possible conserved secreted protein                            | Rv0383c.663   | 1.12E-01 | 6.48E-01 | 0.89 | 9.52E-02 | 7.98E-01 | 12.9 | 12.6 | 12.1 | 13.0 | 12.4 | 13.1 | 12.8 | 13.5 | 13.3 |
| 169 | Rv1630  | MAP1325  | 97 | 30S ribosomal protein S1 RpsA                                  | Rv1630.3839   | 2.07E-01 | 7.15E-01 | 0.78 | 2.62E-01 | 8.76E-01 | 13.0 | 12.7 | 12.3 | 13.2 | 12.9 | 13.1 | 12.9 | 13.4 | 13.2 |
| 170 | Rv1779c | MAP1493c | 56 | Possible integral membrane protein                             | Rv1779c.2853  | 1.23E-02 | 6.27E-01 | 0.89 | 9.52E-02 | 7.98E-01 | 12.9 | 12.4 | 12.2 | 12.6 | 12.4 | 13.1 | 12.8 | 13.5 | 13.2 |
| 171 | Rv3293  | MAP3413  | 80 | Probable piperidine-6-carboxylic acid dehydrogenase Pcd (pip   | Rv3293.3133   | 1.96E-01 | 6.98E-01 | 0.78 | 2.62E-01 | 8.76E-01 | 13.0 | 12.8 | 12.6 | 13.1 | 12.9 | 13.1 | 12.8 | 13.4 | 13.1 |
| 172 | Rv3344c | No hit   | 0  | PE-PGRS family protein PE_PGRS49                               | Rv3344c.3521  | 4.23E-01 | 8.35E-01 | 0.33 | 5.48E-01 | 9.11E-01 | 13.3 | 13.6 | 12.7 | 14.4 | 13.8 | 13.1 | 12.9 | 13.4 | 13.1 |
| 173 | Rv2818c | MAP0893  | 30 | Hypothetical protein                                           | Rv2818c.3561  | 6.66E-02 | 6.48E-01 | 0.67 | 5.48E-01 | 9.11E-01 | 13.0 | 12.9 | 12.8 | 12.9 | 12.9 | 13.1 | 12.9 | 13.3 | 13.3 |
| 174 | Rv1469  | MAP3384  | 32 | Hypothetical protein                                           | Rv1469-m.2.85 | 2.17E-01 | 7.29E-01 | 0.78 | 2.62E-01 | 8.76E-01 | 13.2 | 10.8 | 13.3 | 11.7 | 13.1 | 12.6 | 13.7 | 13.0 | 13.0 |
| 175 | Rv0878c | MAP3939c | 55 | PPE family protein PPE13                                       | Rv0878c.2251  | 9.74E-02 | 6.48E-01 | 0.89 | 9.52E-02 | 7.98E-01 | 12.8 | 12.1 | 11.4 | 12.9 | 12.4 | 13.1 | 12.7 | 13.6 | 13.2 |
| 176 | Rv1515c | MAP3643c | 26 | hypothetical protein                                           | Rv1515c.2786  | 9.16E-01 | 9.81E-01 | 0.56 | 9.05E-01 | 9.80E-01 | 13.1 | 13.1 | 12.9 | 13.3 | 13.0 | 13.1 | 12.8 | 13.5 | 13.1 |
| 177 | Rv3802c | MAP0218  | 76 | Probable conserved membrane protein                            | Rv3802c.86    | 3.75E-01 | 8.34E-01 | 0.72 | 3.81E-01 | 8.90E-01 | 13.0 | 12.7 | 12.3 | 13.2 | 13.0 | 13.1 | 12.5 | 13.8 | 13.0 |
| 178 | Rv0831c | MAP2559  | 27 | hypothetical protein                                           | Rv0831c.2975  | 2.60E-01 | 7.62E-01 | 0.61 | 7.14E-01 | 9.59E-01 | 13.0 | 12.7 | 12.5 | 13.0 | 12.8 | 13.1 | 12.5 | 13.7 | 12.9 |
| 179 | Rv1174c | MAP1143c | 62 | Low molecular weight T-cell antigen TB8.4                      | Rv1174c.2915  | 1.06E-01 | 6.48E-01 | 0.78 | 2.62E-01 | 8.76E-01 | 13.6 | 12.7 | 12.5 | 11.8 | 13.1 | 11.7 | 14.5 | 13.6 | 13.6 |
| 180 | Rv2080  | MAP2417c | 32 | Lipoprotein LppJ                                               | Rv2080.2745   | 7.32E-01 | 9.56E-01 | 0.44 | 9.05E-01 | 9.80E-01 | 13.1 | 13.2 | 12.9 | 13.5 | 13.2 | 13.1 | 12.8 | 13.5 | 13.0 |
| 181 | Rv0625c | MAP4090c | 78 | Probable conserved transmembrane protein                       | Rv0625c.456   | 3.88E-01 | 8.35E-01 | 0.67 | 5.48E-01 | 9.11E-01 | 13.0 | 12.7 | 12.1 | 13.4 | 13.0 | 13.1 | 12.8 | 13.5 | 13.1 |
| 182 | Rv1509  | MAP3459  | 27 | Hypothetical protein                                           | Rv1509.2791   | 8.82E-02 | 6.48E-01 | 0.72 | 3.81E-01 | 8.90E-01 | 13.0 | 12.7 | 12.5 | 12.9 | 12.8 | 13.1 | 12.7 | 13.5 | 13.3 |
| 183 | Rv3355c | MAP3462c | 78 | Probable integral membrane protein                             | Rv3355c.398   | 1.20E-01 | 6.66E-01 | 0.78 | 2.62E-01 | 8.76E-01 | 12.9 | 12.6 | 12.2 | 13.0 | 12.7 | 13.1 | 12.7 | 13.5 | 13.3 |
| 184 | Rv3333c | MAP3461  | 29 | Hypothetical proline rich protein                              | Rv3333c.1182  | 8.99E-01 | 9.78E-01 | 0.61 | 7.14E-01 | 9.59E-01 | 13.1 | 13.1 | 12.8 | 13.3 | 13.1 | 13.1 | 12.6 | 13.6 | 13.2 |
| 185 | Rv2880c | MAP2943c | 88 | hypothetical protein                                           | Rv2880c.1628  | 1.33E-01 | 6.83E-01 | 0.78 | 2.62E-01 | 8.76E-01 | 13.0 | 12.6 | 12.3 | 13.0 | 12.7 | 13.1 | 12.7 | 13.5 | 13.2 |
| 186 | Rv2682c | MAP2803c | 88 | Probable 1-deoxy-D-xylulose 5-phosphate synthase Dxs1 (1-de    | Rv2682c.3441  | 1.62E-01 | 6.83E-01 | 0.72 | 3.81E-01 | 8.90E-01 | 13.0 | 12.8 | 12.6 | 13.0 | 12.8 | 13.1 | 12.8 | 13.4 | 13.2 |
| 187 | Rv2935  | MAP2230c | 37 | Phenolphthiocerol synthesis type-I polyketide synthase PpsE    | Rv2935-s3.56  | 5.40E-01 | 8.97E-01 | 0.67 | 5.48E-01 | 9.11E-01 | 13.0 | 12.8 | 12.0 | 13.6 | 13.1 | 13.1 | 12.6 | 13.6 | 13.2 |
| 188 | Rv1227c | MAP2102c | 44 | Probable transmembrane protein                                 | Rv1227c.425   | 2.09E-01 | 7.15E-01 | 0.78 | 2.62E-01 | 8.76E-01 | 12.9 | 12.5 | 12.0 | 13.1 | 12.8 | 13.1 | 12.5 | 13.7 | 13.1 |
| 189 | Rv0155  | MAP3572  | 89 | Probable NAD(P) transhydrogenase (subunit alpha) PntAa [first  | Rv0155.2816   | 1.93E-02 | 6.27E-01 | 1.00 | 2.38E-02 | 7.98E-01 | 12.9 | 12.5 | 12.2 | 12.8 | 12.6 | 13.1 | 12.9 | 13.3 | 13.1 |
| 190 | Rv0588  | MAP4083  | 92 | Conserved hypothetical integral membrane protein YrbE2B        | Rv0588.184    | 1.55E-01 | 6.83E-01 | 0.78 | 2.62E-01 | 8.76E-01 | 12.9 | 12.7 | 12.2 | 13.1 | 12.8 | 13.1 | 12.8 | 13.4 | 13.1 |
| 191 | Rv1728c | MAP2475  | 65 | hypothetical protein                                           | Rv1728c.3933  | 3.96E-01 | 8.35E-01 | 0.67 | 5.48E-01 | 9.11E-01 | 13.0 | 12.8 | 12.2 | 13.3 | 12.8 | 13.1 | 12.8 | 13.4 | 13.1 |
| 192 | Rv1705c | MAP1506  | 45 | PPE family protein PPE22                                       | Rv1705c.3108  | 4.87E-02 | 6.27E-01 | 0.89 | 9.52E-02 | 7.98E-01 | 12.9 | 12.4 | 12.2 | 12.6 | 12.5 | 13.1 | 12.5 | 13.6 | 13.0 |
| 193 | Rv3578  | MAP0484c | 76 | Possible arsenical pump integral membrane protein ArsB2        | Rv3578.1103   | 4.96E-02 | 6.27E-01 | 0.89 | 9.52E-02 | 7.98E-01 | 12.9 | 12.6 | 12.3 | 12.9 | 12.6 | 13.1 | 12.8 | 13.4 | 13.2 |
| 194 | Rv0389  | MAP2259  | 64 | Probable phosphoribosylglycinamide formyltransferase 2 PurT    | Rv0389.237    | 5.96E-01 | 9.20E-01 | 0.67 | 5.48E-01 | 9.11E-01 | 13.0 | 12.9 | 12.3 | 13.5 | 13.1 | 13.1 | 12.6 | 13.6 | 13.0 |
| 195 | Rv3864  | MAP2079  | 33 | ESX-1 secretion-associated protein EspE                        | Rv3864.4115   | 4.28E-01 | 8.35E-01 | 0.67 | 5.48E-01 | 9.11E-01 | 13.0 | 12.8 | 12.3 | 13.3 | 12.9 | 13.1 | 12.6 | 13.6 | 13.0 |
| 196 | Rv3009c | MAP3042c | 91 | Probable glutamyl-tRNA(GLN) amidotransferase (subunit B) Ga    | Rv3009c.1704  | 6.16E-01 | 9.31E-01 | 0.33 | 5.48E-01 | 9.11E-01 | 13.2 | 13.4 | 12.4 | 14.5 | 13.0 | 13.1 | 12.5 | 13.7 | 12.8 |
| 197 | Rv0589  | MAP4084  | 83 | Mce-family protein Mce2A                                       | Rv0589.2664   | 1.11E-01 | 6.48E-01 | 0.78 | 2.62E-01 | 8.76E-01 | 12.9 | 12.5 | 12.1 | 12.9 | 12.4 | 13.1 | 12.7 | 13.5 | 13.1 |

Table S3 continued

|     |         |          |    |                                                                                |               |          |          |      |          |          |      |      |      |      |      |      |      |      |      |
|-----|---------|----------|----|--------------------------------------------------------------------------------|---------------|----------|----------|------|----------|----------|------|------|------|------|------|------|------|------|------|
| 211 | Rv1554  | MAP2117c | 32 | Probable fumarate reductase [membrane anchor subunit] FrcD                     | Rv1554.3515   | 1.43E-01 | 6.83E-01 | 0.72 | 3.81E-01 | 8.90E-01 | 13.0 | 12.7 | 12.5 | 12.9 | 12.8 | 13.1 | 12.7 | 13.4 | 13.3 |
| 212 | Rv3163c | MAP3217c | 80 | Possible conserved secreted protein                                            | Rv3163c.3116  | 2.66E-02 | 6.27E-01 | 0.89 | 9.52E-02 | 7.98E-01 | 12.9 | 12.5 | 12.3 | 12.7 | 12.5 | 13.1 | 12.7 | 13.4 | 13.1 |
| 213 | Rv1228  | MAP4253  | 30 | Probable lipoprotein LpqX                                                      | Rv1228.721    | 1.25E-01 | 6.73E-01 | 0.94 | 4.76E-02 | 7.98E-01 | 12.8 | 12.3 | 11.6 | 12.9 | 12.5 | 13.1 | 12.8 | 13.3 | 13.2 |
| 214 | Rv1208  | MAP2569c | 82 | Probable glucosyl-3-phosphoglycerate synthase GpgS                             | Rv1208.789    | 5.15E-01 | 8.89E-01 | 0.83 | 1.67E-01 | 8.62E-01 | 13.0 | 12.9 | 12.6 | 13.2 | 13.0 | 13.1 | 12.7 | 13.4 | 13.1 |
| 215 | Rv1689  | MAP1396  | 87 | Probable tyrosyl-tRNA synthase TyrS (TYRRS)                                    | Rv1689.3405   | 7.87E-02 | 6.48E-01 | 0.89 | 9.52E-02 | 7.98E-01 | 12.8 | 12.4 | 12.0 | 12.9 | 12.4 | 13.1 | 12.7 | 13.4 | 13.2 |
| 216 | Rv1637c | MAP0174  | 81 | hypothetical protein                                                           | Rv1637c.3655  | 3.96E-01 | 8.35E-01 | 0.67 | 5.48E-01 | 9.11E-01 | 13.0 | 12.9 | 12.7 | 13.1 | 12.8 | 13.1 | 12.8 | 13.3 | 13.1 |
| 217 | Rv2335  | MAP2042c | 78 | Probable serine acetyltransferase CysE (sat)                                   | Rv2335.444    | 3.94E-01 | 8.35E-01 | 0.67 | 5.48E-01 | 9.11E-01 | 12.9 | 12.7 | 12.0 | 13.3 | 13.0 | 13.1 | 12.6 | 13.5 | 13.0 |
| 218 | Rv1072  | MAP1019  | 86 | Probable conserved transmembrane protein                                       | Rv1072.4218   | 2.59E-01 | 7.62E-01 | 0.72 | 3.81E-01 | 8.90E-01 | 12.9 | 12.6 | 12.1 | 13.0 | 12.5 | 13.1 | 12.4 | 13.7 | 13.0 |
| 219 | Rv1796  | MAP1511  | 73 | Hypothetical protein                                                           | Rv1796.281    | 4.40E-01 | 8.41E-01 | 0.33 | 5.48E-01 | 9.11E-01 | 13.2 | 13.4 | 12.9 | 13.9 | 13.1 | 13.1 | 12.5 | 13.6 | 13.1 |
| 220 | Rv3145  | MAP3201  | 82 | Probable NADH dehydrogenase I (chain A) NuoA (NADH-ubiquinone)                 | Rv3145.118    | 5.49E-02 | 6.35E-01 | 0.89 | 9.52E-02 | 7.98E-01 | 12.8 | 12.3 | 11.8 | 12.7 | 12.5 | 13.1 | 12.8 | 13.3 | 13.1 |
| 221 | Rv2783c | MAP2891c | 90 | Bifunctional protein polyribonucleotide nucleotidyltransferase                 | Rv2783c.4130  | 1.48E-01 | 6.83E-01 | 0.83 | 1.67E-01 | 8.62E-01 | 12.9 | 12.6 | 12.3 | 13.0 | 12.5 | 13.1 | 12.7 | 13.4 | 13.0 |
| 222 | Rv3881c | MAP1144c | 24 | Secreted ESX-1 substrate protein B, EspB. Conserved alanine                    | Rv3881c.3206  | 4.11E-01 | 8.35E-01 | 0.33 | 5.48E-01 | 9.11E-01 | 13.2 | 13.4 | 12.8 | 13.9 | 13.2 | 13.1 | 12.6 | 13.5 | 13.1 |
| 223 | Rv2398c | MAP2211c | 86 | Probable sulfate-transport integral membrane protein ABC                       | Rv2398c.182   | 7.09E-02 | 6.48E-01 | 0.89 | 9.52E-02 | 7.98E-01 | 12.8 | 12.3 | 11.9 | 12.8 | 12.3 | 13.1 | 12.6 | 13.5 | 13.0 |
| 224 | Rv3878  | MAP3837c | 47 | ESX-1 secretion-associated protein EspJ Conserved alanine                      | Rv3878.1247   | 8.69E-01 | 9.70E-01 | 0.56 | 9.05E-01 | 9.80E-01 | 13.0 | 13.0 | 12.5 | 13.5 | 12.9 | 13.1 | 12.7 | 13.4 | 13.2 |
| 225 | Rv1861  | MAP1570  | 97 | Probable conserved transmembrane protein                                       | Rv1861.2093   | 5.47E-01 | 8.97E-01 | 0.61 | 7.14E-01 | 9.59E-01 | 13.0 | 12.8 | 12.2 | 13.4 | 13.0 | 13.1 | 12.5 | 13.6 | 13.1 |
| 226 | Rv2156c | MAP2540c | 50 | Probable phospho-N-acetylmuramoyl-pentapeptidyltransferase                     | Rv2156c.3393  | 6.93E-01 | 9.51E-01 | 0.61 | 7.14E-01 | 9.59E-01 | 13.0 | 12.9 | 12.8 | 13.1 | 13.0 | 13.1 | 12.6 | 13.5 | 13.1 |
| 227 | Rv2414c | MAP1299  | 33 | hypothetical protein                                                           | Rv2414c.4306  | 4.99E-02 | 6.27E-01 | 0.78 | 2.62E-01 | 8.76E-01 | 12.9 | 12.6 | 12.5 | 12.7 | 12.6 | 13.0 | 12.7 | 13.4 | 13.2 |
| 228 | Rv2046  | MAP1781  | 57 | Probable lipoprotein LppI                                                      | Rv2046.1899   | 7.16E-02 | 6.48E-01 | 0.83 | 1.67E-01 | 8.62E-01 | 12.8 | 12.5 | 12.0 | 12.8 | 12.5 | 13.1 | 12.6 | 13.5 | 13.1 |
| 229 | Rv3155  | MAP3211  | 95 | Probable NADH dehydrogenase I (chain K) NuoK (NADH-ubiquinone)                 | Rv3155.4162   | 7.65E-02 | 6.48E-01 | 0.72 | 3.81E-01 | 8.90E-01 | 12.9 | 12.7 | 12.6 | 12.8 | 12.7 | 13.0 | 12.7 | 13.4 | 13.1 |
| 230 | Rv0025  | MAP0037  | 58 | hypothetical protein                                                           | Rv0025.3865   | 5.24E-01 | 8.93E-01 | 0.39 | 7.14E-01 | 9.59E-01 | 13.1 | 13.2 | 12.9 | 13.6 | 13.1 | 13.0 | 12.7 | 13.4 | 13.0 |
| 231 | Rv3042c | MAP0343  | 84 | Probable phosphoserine phosphatase SerB2 (PSP) (O-phospho)                     | Rv3042c.2837  | 1.83E-01 | 6.88E-01 | 0.72 | 3.81E-01 | 8.90E-01 | 12.9 | 12.7 | 12.4 | 12.9 | 12.8 | 13.0 | 12.6 | 13.5 | 13.3 |
| 232 | Rv2740  | MAP1602c | 65 | Epoxide hydrolase                                                              | Rv2740.650    | 3.91E-01 | 8.35E-01 | 0.67 | 5.48E-01 | 9.11E-01 | 13.0 | 12.8 | 12.5 | 13.2 | 12.9 | 13.0 | 12.7 | 13.4 | 13.1 |
| 233 | Rv0650  | MAP4123  | 72 | Possible sugar kinase                                                          | Rv0650.3365   | 3.85E-02 | 6.27E-01 | 0.83 | 1.67E-01 | 8.62E-01 | 12.9 | 12.5 | 12.3 | 12.7 | 12.5 | 13.0 | 12.7 | 13.4 | 13.1 |
| 234 | Rv2048c | MAP0931  | 81 | Polyketide synthase Pks12                                                      | Rv2048c-s5.57 | 8.21E-01 | 9.68E-01 | 0.56 | 9.05E-01 | 9.80E-01 | 13.0 | 13.0 | 12.6 | 13.4 | 12.9 | 13.0 | 12.7 | 13.4 | 13.1 |
| 235 | Rv2330c | MAP2103c | 73 | Probable lipoprotein LppP                                                      | Rv2330c.914   | 4.15E-01 | 8.35E-01 | 0.67 | 5.48E-01 | 9.11E-01 | 13.0 | 12.9 | 12.6 | 13.1 | 12.8 | 13.0 | 12.7 | 13.3 | 13.2 |
| 236 | Rv2048c | MAP0931  | 81 | Polyketide synthase Pks12                                                      | Rv2048c-s6.8c | 1.13E-01 | 6.48E-01 | 0.78 | 2.62E-01 | 8.76E-01 | 12.9 | 12.5 | 12.1 | 12.9 | 12.6 | 13.0 | 12.6 | 13.4 | 13.0 |
| 237 | Rv0314c | MAP3802c | 54 | Possible conserved membrane protein                                            | Rv0314c.454   | 6.56E-02 | 6.48E-01 | 0.89 | 9.52E-02 | 7.98E-01 | 12.9 | 12.6 | 12.4 | 12.9 | 12.7 | 13.0 | 12.8 | 13.3 | 13.1 |
| 238 | Rv2709  | MAP2825  | 69 | Probable conserved transmembrane protein                                       | Rv2709.361    | 4.11E-01 | 8.35E-01 | 0.67 | 5.48E-01 | 9.11E-01 | 13.0 | 12.8 | 12.4 | 13.2 | 12.8 | 13.0 | 12.7 | 13.4 | 13.1 |
| 239 | Rv2458  | MAP2279  | 76 | Probable homocysteine S-methyltransferase MmuM (S-methyl)                      | Rv2458.3371   | 2.06E-02 | 6.27E-01 | 0.89 | 9.52E-02 | 7.98E-01 | 12.9 | 12.5 | 12.3 | 12.7 | 12.5 | 13.0 | 12.8 | 13.3 | 13.1 |
| 240 | Rv2958c | MAP2851c | 34 | Possible glycosyl transferase                                                  | Rv2958c.3689  | 7.41E-01 | 9.57E-01 | 0.44 | 9.05E-01 | 9.80E-01 | 13.1 | 13.1 | 12.8 | 13.4 | 13.0 | 13.0 | 12.5 | 13.6 | 13.0 |
| 241 | Rv3313c | MAP3438c | 84 | Probable adenosine deaminase Add (adenosine aminohydrolase)                    | Rv3313c.3388  | 4.63E-01 | 8.48E-01 | 0.67 | 5.48E-01 | 9.11E-01 | 13.0 | 12.9 | 12.8 | 13.0 | 12.9 | 13.0 | 12.7 | 13.3 | 13.1 |
| 242 | Rv0125  | MAP3527  | 71 | Probable serine protease PepA (serine proteinase) (MTB32A)                     | Rv0125.3792   | 1.27E-01 | 6.73E-01 | 0.78 | 2.62E-01 | 8.76E-01 | 12.8 | 12.4 | 12.0 | 12.9 | 12.5 | 13.0 | 12.6 | 13.5 | 12.9 |
| 243 | Rv0170  | MAP3605  | 78 | Mce-family protein Mce1B                                                       | Rv0170.2951   | 1.76E-01 | 6.83E-01 | 0.78 | 2.62E-01 | 8.76E-01 | 12.9 | 12.5 | 12.2 | 12.9 | 12.5 | 13.0 | 12.5 | 13.6 | 13.0 |
| 244 | Rv1987  | MAP1706  | 74 | Possible chitinase                                                             | Rv1987.1806   | 3.70E-01 | 8.32E-01 | 0.72 | 3.81E-01 | 8.90E-01 | 12.9 | 12.6 | 12.0 | 13.3 | 12.9 | 13.0 | 12.7 | 13.4 | 13.1 |
| 245 | Rv0493c | MAP3985c | 73 | hypothetical protein                                                           | Rv0493c.790   | 1.66E-01 | 6.83E-01 | 0.78 | 2.62E-01 | 8.76E-01 | 12.9 | 12.6 | 12.1 | 13.0 | 12.7 | 13.0 | 12.7 | 13.4 | 13.0 |
| 246 | Rv3221c | MAP3322c | 92 | Biotinylated protein Tb7.3                                                     | Rv3221c.3803  | 2.42E-01 | 7.47E-01 | 0.72 | 3.81E-01 | 8.90E-01 | 12.8 | 12.5 | 11.9 | 13.1 | 12.4 | 13.0 | 12.7 | 13.3 | 13.0 |
| 247 | Rv3828c | MAP2620c | 39 | Possible resolvase                                                             | Rv3828c.3796  | 4.67E-01 | 8.54E-01 | 0.72 | 3.81E-01 | 8.90E-01 | 12.9 | 12.6 | 11.7 | 13.5 | 12.6 | 13.0 | 12.8 | 13.3 | 13.0 |
| 248 | Rv2701c | MAP2818c | 74 | Inositol-1-monophosphatase SuhB                                                | Rv2701c.469   | 9.11E-01 | 9.81E-01 | 0.56 | 9.05E-01 | 9.80E-01 | 13.0 | 13.0 | 12.8 | 13.2 | 12.9 | 13.0 | 12.7 | 13.3 | 13.1 |
| 249 | Rv0996  | MAP0927  | 64 | Probable conserved transmembrane protein                                       | Rv0996.959    | 5.03E-01 | 8.85E-01 | 0.67 | 5.48E-01 | 9.11E-01 | 12.9 | 12.8 | 12.7 | 12.9 | 12.8 | 13.0 | 12.4 | 13.7 | 13.1 |
| 250 | Rv2506  | MAP0666c | 80 | Probable transcriptional regulatory protein (probably TetR-family)             | Rv2506.742    | 6.60E-01 | 9.36E-01 | 0.44 | 9.05E-01 | 9.80E-01 | 13.1 | 13.2 | 12.7 | 13.6 | 12.9 | 13.0 | 12.7 | 13.3 | 13.0 |
| 251 | Rv1777  | MAP0009  | 65 | Probable cytochrome P450 144 Cyp144                                            | Rv1777.3809   | 5.23E-01 | 8.93E-01 | 0.33 | 5.48E-01 | 9.11E-01 | 13.1 | 13.4 | 12.6 | 14.2 | 13.1 | 13.0 | 12.4 | 13.6 | 13.2 |
| 252 | Rv3201c | MAP3300c | 77 | hypothetical protein                                                           | Rv3201c.2594  | 6.39E-02 | 6.48E-01 | 0.83 | 1.67E-01 | 8.62E-01 | 12.8 | 12.5 | 12.3 | 12.7 | 12.6 | 13.0 | 12.6 | 13.4 | 13.1 |
| 253 | Rv0244c | MAP3694c | 91 | hypothetical protein                                                           | Rv0244c.280   | 3.56E-01 | 8.22E-01 | 0.22 | 2.62E-01 | 8.76E-01 | 13.1 | 13.3 | 13.0 | 13.7 | 13.3 | 13.0 | 12.5 | 13.6 | 12.8 |
| 254 | Rv0032  | MAP1275  | 36 | Possible 8-amino-7-oxononanoate synthase BioF2 (AONS) (8-amino-7-oxononanoate) | Rv0032.1125   | 1.34E-01 | 6.83E-01 | 0.89 | 9.52E-02 | 7.98E-01 | 12.8 | 12.4 | 11.9 | 12.9 | 12.5 | 13.0 | 12.7 | 13.3 | 13.0 |
| 255 | Rv3486  | MAP1775  | 24 | hypothetical protein                                                           | Rv3486.133    | 3.25E-01 | 8.04E-01 | 0.67 | 5.48E-01 | 9.11E-01 | 12.9 | 12.6 | 11.9 | 13.2 | 12.8 | 13.0 | 12.7 | 13.3 | 13.0 |
| 256 | Rv0767c | MAP0601c | 76 | hypothetical protein                                                           | Rv0767c.3337  | 1.52E-01 | 6.83E-01 | 0.78 | 2.62E-01 | 8.76E-01 | 12.9 | 12.5 | 12.4 | 13.0 | 12.8 | 13.0 | 12.8 | 13.3 | 13.0 |
| 257 | Rv0433  | MAP3922  | 87 | hypothetical protein                                                           | Rv0433.1077   | 3.22E-02 | 6.27E-01 | 0.83 | 1.67E-01 | 8.62E-01 | 12.8 | 12.7 | 12.3 | 12.7 | 12.4 | 13.0 | 12.7 | 13.3 | 13.1 |
| 258 | Rv1488  | MAP1214  | 93 | Possible exported conserved protein                                            | Rv1488.1185   | 3.49E-01 | 8.22E-01 | 0.72 | 3.81E-01 | 8.90E-01 | 12.8 | 12.5 | 11.6 | 13.3 | 12.7 | 13.0 | 12.5 | 13.5 | 13.2 |
| 259 | Rv0228  | MAP3667  | 80 | Probable integral membrane acyltransferase                                     | Rv0228.3987   | 8.69E-01 | 9.70E-01 | 0.50 | 1.00E+00 | 1.00E+00 | 13.0 | 13.0 | 12.7 | 13.4 | 12.9 | 13.0 | 12.7 | 13.3 | 13.1 |
| 260 | Rv2316  | MAP2090  | 85 | Probable sugar-transport integral membrane protein ABC                         | Rv2316.180    | 2.95E-01 | 7.74E-01 | 0.67 | 5.48E-01 | 9.11E-01 | 12.9 | 12.6 | 12.1 | 13.1 | 12.5 | 13.0 | 12.5 | 13.6 | 12.9 |
| 261 | Rv0108c | MAP3499c | 83 | Hypothetical protein                                                           | Rv0108c.384   | 7.64E-02 | 6.48E-01 | 0.83 | 1.67E-01 | 8.62E-01 | 12.9 | 12.6 | 12.4 | 12.8 | 12.6 | 13.0 | 12.6 | 13.4 | 13.1 |
| 262 | Rv2768c | MAP1003c | 51 | PPE family protein PPE43                                                       | Rv2768c.929   | 6.29E-01 | 9.31E-01 | 0.61 | 7.14E-01 | 9.59E-01 | 13.0 | 12.9 | 12.7 | 13.1 | 12.8 | 13.0 | 12.6 | 13.4 | 12.9 |
| 263 | Rv0426c | MAP3915c | 65 | Possible transmembrane protein                                                 | Rv0426c.2070  | 7.82E-01 | 9.65E-01 | 0.50 | 1.00E+00 | 1.00E+00 | 13.0 | 13.0 | 12.9 | 13.2 | 13.1 | 13.0 | 12.8 | 13.2 | 13.1 |
| 264 | Rv1239c | MAP2542  | 78 | Possible magnesium and cobalt transport transmembrane                          | Rv1239c.3394  | 8.84E-01 | 9.73E-01 | 0.50 | 1.00E+00 | 1.00E+00 | 13.0 | 12.9 | 12.5 | 13.4 | 12.9 | 13.0 | 12.6 | 13.4 | 13.0 |
| 265 | Rv3350c | MAP2047  | 62 | PPE family protein PPE56                                                       | Rv3350c-s5.23 | 1.40E-01 | 6.83E-01 | 0.72 | 3.81E-01 | 8.90E-01 | 12.9 | 12.7 | 12.6 | 12.7 | 12.7 | 13.0 | 12.6 | 13.3 | 12.8 |
| 266 | Rv1395  | MAP0223c | 35 | Transcriptional regulatory protein                                             | Rv1395.3671   | 1.47E-01 | 6.83E-01 | 0.83 | 1.67E-01 | 8.62E-01 | 12.9 | 12.6 | 12.7 | 12.9 | 12.6 | 13.0 | 12.6 | 13.4 | 13.1 |
| 267 | Rv0953c | MAP0899c | 88 | Possible oxidoreductase                                                        | Rv0953c.1045  | 8.16E-01 | 9.65E-01 | 0.61 | 7.14E-01 | 9.59E-01 | 13.0 | 12.9 | 12.6 | 13.3 | 12.9 | 13.0 | 12.8 | 13.2 | 13.0 |
| 268 | Rv1437  | MAP1165  | 82 | Probable phosphoglycerate kinase Pkg                                           | Rv1437.808    | 8.39E-02 | 6.48E-01 | 0.83 | 1.67E-01 | 8.62E-01 | 12.8 | 12.4 | 11.9 | 12.8 | 12.3 | 1    |      |      |      |

Table S3 continued

|     |         |          |    |                                                               |                |          |          |      |          |          |      |      |      |      |      |      |      |      |      |
|-----|---------|----------|----|---------------------------------------------------------------|----------------|----------|----------|------|----------|----------|------|------|------|------|------|------|------|------|------|
| 282 | Rv1199c | MAP3759c | 47 | Possible transposase                                          | Rv1199c.2543   | 7.83E-01 | 9.65E-01 | 0.56 | 9.05E-01 | 9.80E-01 | 12.9 | 12.8 | 12.2 | 13.5 | 12.6 | 13.0 | 12.6 | 13.3 | 13.1 |
| 283 | Rv0344c | MAP0258  | 70 | Probable lipoprotein LpqJ                                     | Rv0344c.3612   | 4.62E-01 | 8.48E-01 | 0.61 | 7.14E-01 | 9.59E-01 | 12.9 | 12.7 | 12.1 | 13.3 | 12.6 | 13.0 | 12.6 | 13.3 | 13.1 |
| 284 | Rv3209  | MAP3310  | 57 | hypothetical protein                                          | Rv3209-m.237   | 7.98E-01 | 9.65E-01 | 0.67 | 5.17E-01 | 9.11E-01 | 12.9 | 12.9 | 12.3 | 13.4 | 12.6 | 13.0 | 12.8 | 13.2 | 12.9 |
| 285 | Rv2186c | MAP1924c | 84 | hypothetical protein                                          | Rv2186c.4112   | 1.28E-01 | 6.73E-01 | 0.83 | 1.67E-01 | 8.62E-01 | 12.8 | 12.5 | 12.1 | 12.9 | 12.6 | 13.0 | 12.6 | 13.3 | 13.2 |
| 286 | Rv0597c | MAP3780  | 44 | hypothetical protein                                          | Rv0597c.1681   | 9.18E-01 | 9.81E-01 | 0.56 | 9.05E-01 | 9.80E-01 | 13.0 | 13.0 | 11.8 | 14.2 | 12.7 | 13.0 | 12.4 | 13.6 | 13.0 |
| 287 | Rv1683  | MAP1389  | 84 | Possible bifunctional enzyme; long-chain acyl-CoA synthase an | Rv1683.1139    | 4.70E-02 | 6.27E-01 | 0.89 | 9.52E-02 | 7.98E-01 | 12.8 | 12.5 | 12.3 | 12.7 | 12.5 | 13.0 | 12.6 | 13.3 | 12.9 |
| 288 | Rv0425c | MAP3845  | 38 | Possible metal cation transporting P-type ATPase CtpH         | Rv0425c-s.2.25 | 2.62E-01 | 7.62E-01 | 0.28 | 3.81E-01 | 8.90E-01 | 13.0 | 13.2 | 13.0 | 13.4 | 13.3 | 13.0 | 12.6 | 13.3 | 13.0 |
| 289 | Rv2280  | MAP1073  | 35 | Probable dehydrogenase                                        | Rv2280.3412    | 1.66E-01 | 6.83E-01 | 0.17 | 1.67E-01 | 8.62E-01 | 13.0 | 13.6 | 13.0 | 14.3 | 13.8 | 13.0 | 12.5 | 13.4 | 13.1 |
| 290 | Rv1774  | MAP0081  | 29 | Probable oxidoreductase                                       | Rv1774.1095    | 2.41E-01 | 7.47E-01 | 0.67 | 5.48E-01 | 9.11E-01 | 12.8 | 12.6 | 12.2 | 13.0 | 12.5 | 12.9 | 12.6 | 13.2 | 12.9 |
| 291 | Rv3859c | MAP0172  | 92 | Probable ferredoxin-dependent glutamate synthase [NADPH] (    | Rv3859c-s2.11  | 1.96E-01 | 6.98E-01 | 0.78 | 2.62E-01 | 8.76E-01 | 12.7 | 12.4 | 11.7 | 13.0 | 12.7 | 12.9 | 12.6 | 13.3 | 13.0 |
| 292 | Rv0594  | MAP1476c | 80 | Mce-family protein Mce2F                                      | Rv0594.1787    | 5.47E-01 | 8.97E-01 | 0.61 | 7.14E-01 | 9.59E-01 | 12.8 | 12.6 | 12.0 | 13.3 | 12.7 | 12.9 | 12.3 | 13.6 | 12.8 |
| 293 | Rv3884c | MAP0167  | 88 | ESX conserved component EccA2 ESX-2 type VII secretion syste  | Rv3884c.830    | 1.98E-02 | 6.27E-01 | 0.94 | 4.76E-02 | 7.98E-01 | 12.7 | 12.3 | 12.2 | 12.5 | 12.3 | 12.9 | 12.6 | 13.3 | 12.9 |
| 294 | Rv2491  | MAP0541c | 32 | hypothetical protein                                          | Rv2491.3631    | 8.44E-01 | 9.70E-01 | 0.56 | 9.05E-01 | 9.80E-01 | 12.9 | 12.9 | 12.7 | 13.1 | 12.9 | 12.9 | 12.6 | 13.3 | 13.0 |
| 295 | Rv3061c | MAP3238  | 84 | Probable acyl-CoA dehydrogenase FadE22                        | Rv3061c.3835   | 1.51E-01 | 6.83E-01 | 0.78 | 2.62E-01 | 8.76E-01 | 12.8 | 12.4 | 11.9 | 12.8 | 12.6 | 12.9 | 12.5 | 13.4 | 13.2 |
| 296 | Rv2133c | MAP1878c | 29 | hypothetical protein                                          | Rv2133c.4420   | 4.99E-01 | 8.80E-01 | 0.67 | 5.48E-01 | 9.11E-01 | 12.9 | 12.7 | 12.7 | 13.8 | 12.7 | 12.9 | 12.4 | 13.5 | 13.1 |
| 297 | Rv1680  | MAP1807c | 74 | Hypothetical protein                                          | Rv1680.4524    | 6.04E-01 | 9.22E-01 | 0.39 | 7.14E-01 | 9.59E-01 | 13.0 | 13.1 | 12.7 | 13.4 | 13.1 | 12.9 | 12.6 | 13.3 | 13.0 |
| 298 | Rv0256c | MAP2595  | 66 | PPE family protein PPE2                                       | Rv0256c.1816   | 7.00E-01 | 9.51E-01 | 0.44 | 9.05E-01 | 9.80E-01 | 13.0 | 13.2 | 12.4 | 14.0 | 13.4 | 12.9 | 12.2 | 13.6 | 12.9 |
| 299 | Rv0948c | MAP0892c | 72 | Chorismate mutase                                             | Rv0948c.2718   | 6.56E-01 | 9.36E-01 | 0.56 | 9.05E-01 | 9.80E-01 | 12.9 | 12.9 | 12.5 | 13.1 | 12.7 | 12.9 | 12.6 | 13.3 | 13.0 |
| 300 | Rv3166c | MAP3220c | 61 | hypothetical protein                                          | Rv3166c.2806   | 6.72E-01 | 9.46E-01 | 0.67 | 5.48E-01 | 9.11E-01 | 12.9 | 12.7 | 12.0 | 13.5 | 12.5 | 12.9 | 12.5 | 13.4 | 12.8 |
| 301 | Rv1616  | MAP1309  | 63 | hypothetical protein                                          | Rv1616.986     | 3.41E-01 | 8.15E-01 | 0.67 | 5.48E-01 | 9.11E-01 | 12.9 | 12.7 | 12.3 | 13.0 | 12.6 | 12.9 | 12.6 | 13.3 | 12.9 |
| 302 | Rv1391  | MAP1125  | 90 | Probable DNA/pantothenate metabolism flavoprotein homolog     | Rv1391.231     | 5.18E-02 | 6.27E-01 | 0.89 | 9.52E-02 | 7.98E-01 | 12.7 | 12.3 | 12.0 | 12.7 | 12.5 | 12.9 | 12.6 | 13.3 | 13.0 |
| 303 | Rv3379c | MAP2803c | 49 | Probable 1-deoxy-D-xylulose 5-phosphate synthase Dxs2 (1-de   | Rv3379c.255    | 1.68E-01 | 6.83E-01 | 0.89 | 9.52E-02 | 7.98E-01 | 12.7 | 12.2 | 11.4 | 12.9 | 12.5 | 12.9 | 12.6 | 13.3 | 13.0 |
| 304 | Rv0293c | MAP3789c | 77 | hypothetical protein                                          | Rv0293c.4570   | 4.17E-01 | 8.35E-01 | 0.78 | 2.62E-01 | 8.76E-01 | 12.4 | 12.9 | 12.8 | 12.9 | 12.4 | 13.4 | 12.9 | 12.4 | 12.9 |
| 305 | Rv0901  | MAP2837c | 36 | Possible conserved exported or membrane protein               | Rv0901.3321    | 1.79E-02 | 6.27E-01 | 0.89 | 9.52E-02 | 7.98E-01 | 12.7 | 12.3 | 12.1 | 12.5 | 12.2 | 12.9 | 12.6 | 13.3 | 13.0 |
| 306 | Rv0725c | MAP4189c | 78 | hypothetical protein                                          | Rv0725c.769    | 9.74E-02 | 6.48E-01 | 0.78 | 2.62E-01 | 8.76E-01 | 12.7 | 12.4 | 12.0 | 12.7 | 12.3 | 12.9 | 12.5 | 13.4 | 13.0 |
| 307 | Rv1908c | MAP1668c | 71 | Catalase-peroxidase-peroxynitritase T KatG                    | Rv1908c.611    | 8.95E-01 | 9.77E-01 | 0.50 | 1.00E+00 | 1.00E+00 | 12.9 | 12.9 | 12.5 | 13.2 | 12.9 | 12.9 | 12.5 | 13.3 | 12.7 |
| 308 | Rv0209  | MAP3644  | 61 | Hypothetical protein                                          | Rv0209.214     | 4.18E-01 | 8.35E-01 | 0.67 | 5.48E-01 | 9.11E-01 | 12.8 | 12.6 | 11.9 | 13.2 | 12.4 | 12.9 | 12.6 | 13.3 | 13.0 |
| 309 | Rv0932c | MAP3388c | 80 | Periplasmic phosphate-binding lipoprotein PstS2 (PBP-2) (PstS | Rv0932c.356    | 1.50E-01 | 6.83E-01 | 0.78 | 2.62E-01 | 8.76E-01 | 12.7 | 12.4 | 12.0 | 12.8 | 12.5 | 12.9 | 12.4 | 13.4 | 12.9 |
| 310 | Rv1400c | MAP1128c | 77 | Probable lipase LipH                                          | Rv1400c.3384   | 5.90E-01 | 9.16E-01 | 0.61 | 7.14E-01 | 9.59E-01 | 12.9 | 12.8 | 12.4 | 13.1 | 12.7 | 12.9 | 12.5 | 13.3 | 13.0 |
| 311 | Rv2771c | MAP2876c | 84 | hypothetical protein                                          | Rv2771c.717    | 1.89E-01 | 6.94E-01 | 0.89 | 9.52E-02 | 7.98E-01 | 12.7 | 12.2 | 11.5 | 12.9 | 12.4 | 12.9 | 12.6 | 13.2 | 13.1 |
| 312 | Rv1290c | MAP1726c | 34 | hypothetical protein                                          | Rv1290c.1705   | 6.25E-03 | 6.27E-01 | 1.00 | 2.38E-02 | 7.98E-01 | 12.5 | 11.7 | 11.5 | 11.9 | 11.7 | 12.9 | 12.4 | 13.5 | 12.8 |
| 313 | Rv0755c | MAP3939c | 61 | PPE family protein PPE12                                      | Rv0755c.1996   | 8.73E-01 | 9.70E-01 | 0.50 | 1.00E+00 | 1.00E+00 | 12.9 | 13.0 | 11.9 | 14.1 | 12.5 | 12.9 | 12.4 | 13.4 | 13.0 |
| 314 | Rv3721c | MAP0322c | 78 | DNA polymerase III (subunit gamma/tau) DnaZ/X                 | Rv3721c.2274   | 3.94E-01 | 8.35E-01 | 0.22 | 2.62E-01 | 8.76E-01 | 13.0 | 13.1 | 12.9 | 13.2 | 13.0 | 12.9 | 12.6 | 13.2 | 12.8 |
| 315 | Rv0534c | MAP4029c | 84 | 1,4-dihydroxy-2-naphthoate octaprenyltransferase MenA (DHH    | Rv0534c.3947   | 4.71E-01 | 8.58E-01 | 0.67 | 5.48E-01 | 9.11E-01 | 12.9 | 12.7 | 12.6 | 12.9 | 12.7 | 12.9 | 12.5 | 13.3 | 13.1 |
| 316 | Rv0010c | MAP0012c | 72 | Probable conserved membrane protein                           | Rv0010c.2359   | 2.65E-01 | 7.62E-01 | 0.67 | 5.48E-01 | 9.11E-01 | 12.8 | 12.6 | 12.4 | 12.8 | 12.7 | 12.9 | 12.5 | 13.3 | 13.1 |
| 317 | Rv2680  | MAP2801  | 83 | hypothetical protein                                          | Rv2680.1030    | 9.42E-01 | 9.82E-01 | 0.50 | 1.00E+00 | 1.00E+00 | 12.9 | 12.9 | 12.7 | 13.2 | 12.9 | 12.9 | 12.6 | 13.2 | 12.9 |
| 318 | Rv1022  | MAP0989  | 84 | Probable conserved lipoprotein LpqU                           | Rv1022.2762    | 1.01E-01 | 6.48E-01 | 0.83 | 1.67E-01 | 8.62E-01 | 12.8 | 12.5 | 12.7 | 12.5 | 12.9 | 12.5 | 13.3 | 12.9 | 12.9 |
| 319 | Rv0355c | MAP0554c | 63 | PPE family protein PPE8                                       | Rv0355c-s5.8E  | 6.23E-01 | 9.31E-01 | 0.61 | 7.14E-01 | 9.59E-01 | 12.8 | 12.7 | 12.0 | 13.3 | 12.6 | 12.9 | 12.5 | 13.3 | 12.9 |
| 320 | Rv3626c | MAP0437  | 77 | hypothetical protein                                          | Rv3626c.4250   | 3.04E-01 | 7.74E-01 | 0.28 | 3.81E-01 | 8.90E-01 | 13.1 | 13.4 | 12.7 | 14.2 | 13.1 | 12.9 | 12.4 | 13.4 | 13.0 |
| 321 | Rv3446c | MAP4242  | 57 | Hypothetical alanine and valine rich protein                  | Rv3446c.229    | 8.44E-01 | 9.70E-01 | 0.61 | 7.14E-01 | 9.59E-01 | 12.9 | 12.8 | 12.7 | 13.0 | 12.8 | 12.9 | 12.5 | 13.3 | 13.0 |
| 322 | Rv2575  | MAP1060c | 77 | Possible conserved membrane glycine rich protein              | Rv2575.3080    | 6.27E-02 | 6.48E-01 | 0.89 | 9.52E-02 | 7.98E-01 | 12.7 | 12.4 | 12.1 | 12.7 | 12.4 | 12.9 | 12.6 | 13.2 | 12.9 |
| 323 | Rv2048c | MAP0931  | 81 | Polyketide synthase Pks12                                     | Rv2048c-s1.4C  | 5.10E-02 | 6.27E-01 | 0.83 | 1.67E-01 | 8.62E-01 | 12.7 | 12.4 | 12.2 | 12.6 | 12.4 | 12.9 | 12.5 | 13.3 | 13.1 |
| 324 | Rv0680c | MAP4138c | 67 | Probable conserved transmembrane protein                      | Rv0680c.3801   | 1.71E-01 | 6.83E-01 | 0.83 | 1.67E-01 | 8.62E-01 | 12.7 | 12.4 | 12.0 | 12.9 | 12.5 | 12.9 | 12.6 | 13.2 | 13.0 |
| 325 | Rv0071  | MAP2313c | 28 | Possible maturase                                             | Rv0071.4206    | 5.95E-01 | 9.20E-01 | 0.61 | 7.14E-01 | 9.59E-01 | 12.8 | 12.7 | 12.2 | 13.2 | 12.8 | 12.9 | 12.5 | 13.3 | 12.9 |
| 326 | Rv0102  | MAP2297c | 51 | hypothetical protein                                          | Rv0102.3750    | 3.51E-01 | 8.22E-01 | 0.72 | 3.81E-01 | 8.90E-01 | 12.8 | 12.6 | 12.3 | 13.0 | 12.4 | 12.9 | 12.5 | 13.3 | 13.0 |
| 327 | Rv1258c | MAP2516  | 71 | Probable conserved integral membrane transport protein        | Rv1258c.815    | 1.68E-01 | 6.83E-01 | 0.78 | 2.62E-01 | 8.76E-01 | 12.7 | 12.3 | 11.8 | 12.9 | 12.5 | 12.9 | 12.5 | 13.3 | 12.7 |
| 328 | Rv1083  | MAP2707c | 64 | hypothetical protein                                          | Rv1083.2376    | 6.47E-01 | 9.34E-01 | 0.39 | 7.14E-01 | 9.59E-01 | 12.9 | 13.1 | 12.5 | 13.6 | 12.9 | 12.9 | 12.5 | 13.3 | 12.9 |
| 329 | Rv1502  | MAP0692c | 30 | Hypothetical protein                                          | Rv1502.3081    | 8.17E-02 | 6.48E-01 | 0.89 | 9.52E-02 | 7.98E-01 | 12.7 | 12.4 | 12.1 | 12.7 | 12.4 | 12.9 | 12.5 | 13.2 | 12.9 |
| 330 | Rv1780  | MAP1494  | 89 | hypothetical protein                                          | Rv1780.2456    | 4.94E-02 | 6.27E-01 | 0.83 | 1.67E-01 | 8.62E-01 | 12.7 | 12.3 | 12.3 | 12.4 | 12.3 | 12.9 | 12.5 | 13.3 | 12.8 |
| 331 | Rv0900  | MAP3452c | 27 | Possible membrane protein                                     | Rv0900.2984    | 1.88E-01 | 6.94E-01 | 0.78 | 2.62E-01 | 8.76E-01 | 12.8 | 12.5 | 12.2 | 12.9 | 12.5 | 12.9 | 12.6 | 13.2 | 12.8 |
| 332 | Rv0312  | MAP3800  | 70 | Conserved hypothetical proline and threonine rich protein     | Rv0312.1119    | 9.13E-03 | 6.27E-01 | 0.89 | 9.52E-02 | 7.98E-01 | 12.7 | 12.5 | 12.3 | 12.6 | 12.5 | 12.9 | 12.7 | 13.1 | 12.9 |
| 333 | Rv1283c | MAP2488  | 85 | Probable oligopeptide-transport integral membrane protein A   | Rv1283c.4258   | 1.24E-01 | 6.73E-01 | 0.89 | 9.52E-02 | 7.98E-01 | 12.7 | 12.3 | 11.8 | 12.8 | 12.1 | 12.9 | 12.6 | 13.2 | 13.0 |
| 334 | Rv0044c | MAP0054c | 83 | Possible oxidoreductase                                       | Rv0044c.755    | 4.56E-01 | 8.44E-01 | 0.72 | 3.81E-01 | 8.90E-01 | 12.8 | 12.7 | 12.5 | 12.6 | 12.9 | 12.8 | 12.9 | 13.2 | 12.9 |
| 335 | Rv3308  | MAP3430  | 74 | Probable phosphomannosyltransferase PmmB (phosphomannose      | Rv3308.2278    | 1.10E-01 | 6.48E-01 | 0.72 | 3.81E-01 | 8.90E-01 | 12.8 | 12.5 | 12.5 | 12.6 | 12.5 | 12.9 | 12.5 | 13.2 | 12.8 |
| 336 | Rv3343c | MAP2253  | 60 | PPE family protein PPE54                                      | Rv3343c-s4.4E  | 8.01E-01 | 9.65E-01 | 0.61 | 7.14E-01 | 9.59E-01 | 12.9 | 12.8 | 12.4 | 13.2 | 12.9 | 12.9 | 12.5 | 13.3 | 13.1 |
| 337 | Rv2415c | MAP2226c | 69 | hypothetical protein                                          | Rv2415c.3948   | 1.58E-01 | 6.83E-01 | 0.78 | 2.62E-01 | 8.76E-01 | 12.8 | 12.6 | 12.4 | 12.8 | 12.7 | 12.9 | 12.6 | 13.2 | 12.9 |
| 338 | Rv2048c | MAP0931  | 81 | Polyketide synthase Pks12                                     | Rv2048c-s3.4E  | 1.45E-01 | 6.83E-01 | 0.67 | 5.48E-01 | 9.11E-01 | 12.8 | 12.6 | 12.5 | 12.6 | 12.6 | 12.9 | 12.5 | 13.2 | 13.0 |
| 339 | Rv3630  | MAP0433c | 80 | Probable conserved integral membrane protein                  | Rv3630.3117    | 9.07E-01 | 9.81E-01 | 0.61 | 7.14E-01 | 9.59E-01 | 12.9 | 12.8 | 12.5 | 13.2 | 12.8 | 12.9 | 12.4 | 13.3 | 13.1 |
| 340 | Rv3003c | MAP2636  | 92 |                                                               |                |          |          |      |          |          |      |      |      |      |      |      |      |      |      |

Table S3 continued

|     |         |          |    |                                                                                |               |          |          |      |          |          |      |      |      |      |      |      |      |      |      |
|-----|---------|----------|----|--------------------------------------------------------------------------------|---------------|----------|----------|------|----------|----------|------|------|------|------|------|------|------|------|------|
| 353 | Rv2597  | MAP1035c | 72 | Probable membrane protein                                                      | Rv2597.1525   | 3.66E-01 | 8.32E-01 | 0.61 | 7.14E-01 | 9.59E-01 | 12.8 | 12.6 | 12.3 | 12.9 | 12.5 | 12.9 | 12.5 | 13.2 | 12.9 |
| 354 | Rv2538c | MAP1093  | 90 | 3-dehydroquininate synthase AroB                                               | Rv2538c.3966  | 2.68E-01 | 7.65E-01 | 0.67 | 5.48E-01 | 9.11E-01 | 12.8 | 12.6 | 12.4 | 12.8 | 12.5 | 12.9 | 12.5 | 13.2 | 12.8 |
| 355 | Rv3368c | MAP0746  | 80 | Possible oxidoreductase                                                        | Rv3368c.447   | 2.61E-01 | 7.62E-01 | 0.72 | 3.81E-01 | 8.90E-01 | 12.8 | 12.6 | 12.3 | 12.8 | 12.7 | 12.9 | 12.5 | 13.2 | 13.0 |
| 356 | Rv2193  | MAP0773  | 93 | Probable cytochrome C oxidase (subunit III) CtaE                               | Rv2193.4085   | 1.62E-01 | 6.83E-01 | 0.83 | 1.67E-01 | 8.62E-01 | 12.7 | 12.3 | 11.7 | 12.8 | 12.3 | 12.8 | 12.6 | 13.1 | 12.9 |
| 357 | Rv3723  | MAP0324  | 84 | Probable conserved transmembrane protein                                       | Rv3723.922    | 3.05E-01 | 7.74E-01 | 0.72 | 3.81E-01 | 8.90E-01 | 12.7 | 12.3 | 11.6 | 13.1 | 12.6 | 12.8 | 12.5 | 13.2 | 12.8 |
| 358 | Rv0658c | MAP2640c | 26 | Probable conserved integral membrane protein                                   | Rv0658c.2183  | 1.27E-01 | 6.73E-01 | 0.78 | 2.62E-01 | 8.76E-01 | 12.6 | 12.1 | 11.7 | 12.6 | 12.0 | 12.8 | 12.2 | 13.5 | 12.9 |
| 359 | Rv0304c | MAP0210c | 35 | PPE family protein PPE5                                                        | Rv0304c.2592  | 1.88E-01 | 6.94E-01 | 0.78 | 2.62E-01 | 8.76E-01 | 12.7 | 12.5 | 12.3 | 12.7 | 12.5 | 12.8 | 12.5 | 13.2 | 13.0 |
| 360 | Rv2997  | MAP2158  | 81 | Possible alanine rich dehydrogenase                                            | Rv2997.1108   | 7.70E-02 | 6.48E-01 | 0.78 | 2.62E-01 | 8.76E-01 | 12.6 | 12.1 | 11.7 | 12.6 | 12.3 | 12.8 | 12.3 | 13.3 | 12.9 |
| 361 | Rv1521  | MAP3752  | 63 | Probable fatty-acid-AMP ligase FadD25 (fatty-acid-AMP synthase)                | Rv1521.343    | 7.14E-01 | 9.56E-01 | 0.67 | 5.48E-01 | 9.11E-01 | 12.8 | 12.7 | 12.3 | 13.2 | 12.9 | 12.8 | 12.4 | 13.3 | 13.0 |
| 362 | Rv2693c | MAP2810c | 69 | Probable conserved integral membrane alanine and leucine rich                  | Rv2693c.1888  | 4.95E-01 | 8.80E-01 | 0.67 | 5.48E-01 | 9.11E-01 | 12.8 | 12.6 | 12.2 | 13.0 | 12.5 | 12.8 | 12.3 | 13.4 | 13.0 |
| 363 | Rv1405c | MAP0251c | 75 | Putative methyltransferase                                                     | Rv1405c.4235  | 8.95E-01 | 9.77E-01 | 0.56 | 9.05E-01 | 9.80E-01 | 12.8 | 12.8 | 12.3 | 13.3 | 12.8 | 12.6 | 13.1 | 12.8 | 12.8 |
| 364 | Rv3824c | MAP2231  | 53 | Conserved polyketide synthase associated protein PapA1                         | Rv3824c.548   | 1.95E-01 | 6.98E-01 | 0.78 | 2.62E-01 | 8.76E-01 | 12.6 | 12.3 | 11.7 | 12.8 | 12.3 | 12.8 | 12.3 | 13.4 | 12.7 |
| 365 | Rv1568  | MAP1274  | 82 | Adenosylmethionine-8-amino-7-oxononanoate aminotransferase                     | Rv1568.3690   | 4.30E-01 | 8.35E-01 | 0.28 | 3.81E-01 | 8.90E-01 | 12.9 | 13.0 | 12.8 | 13.2 | 13.1 | 12.8 | 12.4 | 13.2 | 12.8 |
| 366 | Rv3732  | MAP1715  | 27 | hypothetical protein                                                           | Rv3732.3503   | 3.31E-01 | 8.11E-01 | 0.67 | 5.48E-01 | 9.11E-01 | 12.8 | 12.6 | 12.3 | 12.9 | 12.6 | 12.8 | 12.6 | 13.1 | 12.8 |
| 367 | Rv2921c | MAP2989c | 80 | Probable cell division protein FtsY (SRP receptor) (signal recognition)        | Rv2921c.2821  | 8.75E-02 | 6.48E-01 | 0.17 | 1.67E-01 | 8.62E-01 | 13.1 | 13.6 | 13.1 | 14.2 | 13.4 | 12.8 | 12.4 | 13.3 | 12.9 |
| 368 | Rv3103c | MAP3173c | 64 | Hypothetical proline-rich protein                                              | Rv3103c.418   | 6.24E-01 | 9.31E-01 | 0.67 | 5.48E-01 | 9.11E-01 | 12.8 | 12.7 | 12.6 | 12.7 | 12.8 | 12.5 | 13.2 | 12.9 | 12.9 |
| 369 | Rv2243  | MAP1996  | 86 | Malonyl-CoA-acyl carrier protein transacylase FabD (malonyl carrier)           | Rv2243c.2793  | 6.47E-01 | 9.34E-01 | 0.61 | 7.14E-01 | 9.59E-01 | 12.8 | 12.6 | 12.0 | 13.3 | 12.6 | 12.8 | 12.5 | 13.2 | 12.9 |
| 370 | Rv1924c | MAP1715  | 34 | hypothetical protein                                                           | Rv1924c.2719  | 7.64E-01 | 9.65E-01 | 0.61 | 7.14E-01 | 9.59E-01 | 12.8 | 12.8 | 12.7 | 12.9 | 12.7 | 12.8 | 12.4 | 13.3 | 12.9 |
| 371 | Rv0694  | MAP1635c | 89 | Possible L-lactate dehydrogenase (cytochrome) LldD1                            | Rv0694.1670   | 3.09E-01 | 7.75E-01 | 0.72 | 3.81E-01 | 8.90E-01 | 12.7 | 12.4 | 11.8 | 13.0 | 12.3 | 12.8 | 12.3 | 13.4 | 13.0 |
| 372 | Rv3563  | MAP0504c | 78 | Probable acyl-CoA dehydrogenase FadE32                                         | Rv3563.2080   | 9.80E-02 | 6.48E-01 | 0.89 | 9.52E-02 | 7.98E-01 | 12.5 | 12.9 | 11.3 | 12.6 | 12.0 | 12.8 | 12.4 | 13.2 | 12.8 |
| 373 | Rv2977c | MAP3017c | 79 | Probable thiamine-monophosphate kinase ThiL (thiamine-phosphate)               | Rv2977c.1369  | 6.84E-01 | 9.46E-01 | 0.33 | 5.48E-01 | 9.11E-01 | 12.8 | 12.8 | 12.6 | 12.9 | 12.7 | 12.8 | 12.6 | 13.1 | 12.7 |
| 374 | Rv2213  | MAP1953  | 83 | Probable aminopeptidase PepB                                                   | Rv2213.2566   | 1.01E-01 | 6.48E-01 | 0.89 | 9.52E-02 | 7.98E-01 | 12.6 | 12.3 | 11.8 | 12.7 | 12.4 | 12.8 | 12.6 | 13.0 | 12.9 |
| 375 | Rv1216c | MAP2562  | 65 | Probable conserved integral membrane protein                                   | Rv1216c.154   | 5.15E-01 | 8.89E-01 | 0.72 | 3.81E-01 | 8.90E-01 | 12.6 | 12.6 | 12.2 | 13.1 | 12.6 | 12.8 | 12.7 | 13.0 | 12.8 |
| 376 | Rv0562  | MAP4058  | 79 | Probable polyprenyl-diphosphate synthase GrcC1 (polyprenyl synthase)           | Rv0562.213    | 9.48E-01 | 9.82E-01 | 0.39 | 7.14E-01 | 9.59E-01 | 12.8 | 12.8 | 12.7 | 13.0 | 12.9 | 12.8 | 12.6 | 13.1 | 12.7 |
| 377 | Rv1898  | MAP1624  | 88 | hypothetical protein                                                           | Rv1898.399    | 3.10E-01 | 7.75E-01 | 0.72 | 3.81E-01 | 8.90E-01 | 12.7 | 12.5 | 12.7 | 12.6 | 12.2 | 12.8 | 12.3 | 13.4 | 12.9 |
| 378 | Rv3038c | MAP3086c | 84 | hypothetical protein                                                           | Rv3038c.2229  | 2.66E-01 | 7.62E-01 | 0.72 | 3.81E-01 | 8.90E-01 | 12.7 | 12.4 | 12.0 | 12.8 | 12.5 | 12.8 | 12.3 | 13.3 | 13.0 |
| 379 | Rv2471  | MAP0695  | 79 | Probable alpha-glucosidase AgIA (maltase) (glucoinvertase) (gly)               | Rv2471.4585   | 4.34E-01 | 8.36E-01 | 0.61 | 7.14E-01 | 9.59E-01 | 12.8 | 12.7 | 12.4 | 12.9 | 12.6 | 12.8 | 12.5 | 13.1 | 12.7 |
| 380 | Rv3018c | MAP3737  | 69 | PPE family protein PPE46                                                       | Rv3018c.4387  | 3.94E-01 | 8.35E-01 | 0.67 | 5.48E-01 | 9.11E-01 | 12.7 | 12.3 | 11.5 | 13.2 | 12.3 | 12.8 | 12.3 | 13.4 | 12.9 |
| 381 | Rv0601c | MAP1101  | 43 | Two component sensor kinase [first part]                                       | Rv0601c.3609  | 3.48E-01 | 8.22E-01 | 0.78 | 2.62E-01 | 8.76E-01 | 12.7 | 12.5 | 12.1 | 12.9 | 12.7 | 12.8 | 12.5 | 13.2 | 12.9 |
| 382 | Rv3669  | MAP0405c | 79 | Probable conserved transmembrane protein                                       | Rv3669.999    | 6.99E-02 | 6.48E-01 | 0.11 | 9.52E-02 | 7.98E-01 | 13.0 | 13.4 | 13.1 | 13.7 | 13.3 | 12.8 | 12.4 | 13.2 | 12.8 |
| 383 | Rv0959  | MAP0906  | 90 | hypothetical protein                                                           | Rv0959.2569   | 2.65E-02 | 6.27E-01 | 0.83 | 1.67E-01 | 8.62E-01 | 12.7 | 12.4 | 12.3 | 12.5 | 12.4 | 12.8 | 12.6 | 13.1 | 12.8 |
| 384 | Rv2588c | MAP1042  | 85 | Probable conserved membrane protein secretion factor YajC                      | Rv2588c.2708  | 1.65E-01 | 6.83E-01 | 0.78 | 2.62E-01 | 8.76E-01 | 12.7 | 12.4 | 12.0 | 12.7 | 12.3 | 12.8 | 12.4 | 13.2 | 12.6 |
| 385 | Rv3743c | MAP3384  | 35 | Probable cation transporter P-type ATPase CtpJ                                 | Rv3743c.3725  | 4.27E-01 | 8.35E-01 | 0.72 | 3.81E-01 | 8.90E-01 | 12.8 | 12.6 | 12.4 | 12.8 | 12.5 | 12.8 | 12.4 | 13.2 | 12.9 |
| 386 | Rv1146  | MAP2324c | 83 | Probable conserved transmembrane transport protein MmpL1                       | Rv1146.1968   | 4.51E-01 | 8.44E-01 | 0.67 | 5.48E-01 | 9.11E-01 | 12.7 | 12.6 | 12.1 | 13.0 | 12.5 | 12.8 | 12.4 | 13.2 | 13.0 |
| 387 | Rv2149c | MAP1893c | 84 | Conserved protein YfiH                                                         | Rv2149c.1902  | 1.83E-01 | 6.88E-01 | 0.83 | 1.67E-01 | 8.62E-01 | 12.6 | 12.2 | 11.6 | 12.8 | 12.3 | 12.8 | 12.4 | 13.2 | 12.9 |
| 388 | Rv0354c | MAP0542c | 29 | PPE family protein PPE7                                                        | Rv0354c.1862  | 4.03E-01 | 8.35E-01 | 0.72 | 3.81E-01 | 8.90E-01 | 12.8 | 12.7 | 12.6 | 12.8 | 12.7 | 12.8 | 12.5 | 13.1 | 12.8 |
| 389 | Rv0869c | MAP0807c | 88 | Probable molybdenum cofactor biosynthesis protein A2 MaaA                      | Rv0869c.1948  | 5.54E-01 | 8.97E-01 | 0.67 | 5.48E-01 | 9.11E-01 | 12.8 | 12.7 | 12.4 | 12.9 | 12.6 | 12.8 | 12.5 | 13.1 | 12.9 |
| 390 | Rv3031  | MAP3063  | 86 | hypothetical protein                                                           | Rv3031.838    | 8.63E-01 | 9.70E-01 | 0.44 | 9.05E-01 | 9.80E-01 | 12.8 | 12.9 | 12.3 | 13.5 | 12.8 | 12.8 | 12.3 | 13.3 | 12.9 |
| 391 | Rv1183  | MAP2232  | 57 | hypothetical protein                                                           | Rv1183-s8.31f | 7.06E-02 | 6.48E-01 | 0.83 | 1.67E-01 | 8.62E-01 | 12.5 | 11.8 | 11.4 | 12.2 | 11.9 | 12.8 | 12.0 | 13.6 | 12.8 |
| 392 | Rv2416c | MAP2325  | 35 | Enhanced intracellular survival protein Eis,GCN5-related N-acetyltransferase   | Rv2416c.1674  | 1.14E-01 | 6.48E-01 | 0.78 | 2.62E-01 | 8.76E-01 | 12.7 | 12.3 | 12.0 | 12.6 | 12.4 | 12.8 | 12.4 | 13.2 | 13.0 |
| 393 | Rv1302  | MAP2459c | 94 | Probable undecaprenyl-phosphate alpha-N-acetylglucosaminidase                  | Rv1302.2258   | 2.93E-01 | 7.74E-01 | 0.72 | 3.81E-01 | 8.90E-01 | 12.7 | 12.6 | 12.4 | 12.7 | 12.6 | 12.8 | 12.4 | 13.2 | 12.9 |
| 394 | Rv1487  | MAP1213  | 81 | hypothetical protein                                                           | Rv1487.1285   | 7.42E-01 | 9.57E-01 | 0.44 | 9.05E-01 | 9.80E-01 | 12.8 | 12.9 | 12.4 | 13.4 | 12.9 | 12.8 | 12.4 | 13.2 | 12.8 |
| 395 | Rv0769  | MAP0350  | 81 | Probable dehydrogenase/reductase                                               | Rv0769.4214   | 8.11E-01 | 9.65E-01 | 0.44 | 9.05E-01 | 9.80E-01 | 12.8 | 12.9 | 12.1 | 13.8 | 12.5 | 12.8 | 12.5 | 13.1 | 13.0 |
| 396 | Rv3273  | MAP0127  | 60 | Probable transmembrane carbonic anhydrase (carbonate dehydratase)              | Rv3273.2287   | 9.99E-01 | 9.99E-01 | 0.50 | 1.00E+00 | 1.00E+00 | 12.8 | 12.8 | 12.5 | 13.1 | 12.8 | 12.8 | 12.4 | 13.2 | 12.7 |
| 397 | Rv2721c | MAP0904  | 60 | hypothetical protein                                                           | Rv2721c.4328  | 5.05E-01 | 8.86E-01 | 0.33 | 5.48E-01 | 9.11E-01 | 12.9 | 13.0 | 12.5 | 13.5 | 13.0 | 12.8 | 12.5 | 13.1 | 12.9 |
| 398 | Rv1442  | MAP1424c | 22 | Probable biotin sulfoxide reductase BisC (BDS reductase) (BSO)                 | Rv1442.258    | 1.78E-01 | 6.85E-01 | 0.83 | 1.67E-01 | 8.62E-01 | 12.7 | 12.5 | 12.3 | 12.8 | 12.6 | 12.8 | 12.5 | 13.1 | 12.9 |
| 399 | Rv0497  | MAP3988  | 60 | Probable conserved transmembrane protein                                       | Rv0497.1242   | 5.44E-01 | 8.97E-01 | 0.33 | 5.48E-01 | 9.11E-01 | 12.9 | 13.1 | 12.3 | 14.0 | 13.5 | 12.8 | 12.5 | 13.1 | 12.9 |
| 400 | Rv3892c | MAP0158  | 70 | PPE family protein PPE69                                                       | Rv3892c.3820  | 8.32E-01 | 9.70E-01 | 0.56 | 9.05E-01 | 9.80E-01 | 12.8 | 12.7 | 12.0 | 13.4 | 12.7 | 12.8 | 12.3 | 13.3 | 12.8 |
| 401 | Rv2098c | MAP4144  | 64 | hypothetical protein                                                           | Rv2098c.4098  | 3.08E-01 | 7.75E-01 | 0.39 | 7.14E-01 | 9.59E-01 | 12.9 | 13.1 | 12.7 | 13.6 | 12.9 | 12.8 | 12.4 | 13.2 | 12.8 |
| 402 | Rv3438  | MAP4251c | 79 | hypothetical protein                                                           | Rv3438.1536   | 4.24E-01 | 8.35E-01 | 0.67 | 5.48E-01 | 9.11E-01 | 12.7 | 12.5 | 11.8 | 13.1 | 12.8 | 12.8 | 12.6 | 13.0 | 12.8 |
| 403 | Rv0018c | MAP0021c | 77 | Phosphoserine/threonine phosphatase PstP                                       | Rv0018c.2949  | 1.79E-01 | 6.88E-01 | 0.83 | 1.67E-01 | 8.62E-01 | 12.6 | 12.3 | 11.9 | 12.8 | 12.4 | 12.8 | 12.6 | 13.0 | 12.7 |
| 404 | Rv0843  | MAP0688  | 44 | Probable dehydrogenase                                                         | Rv0843.2236   | 6.38E-01 | 9.31E-01 | 0.56 | 9.05E-01 | 9.80E-01 | 12.6 | 12.6 | 12.3 | 13.0 | 12.7 | 12.8 | 12.4 | 13.2 | 12.7 |
| 405 | Rv3001c | MAP3036c | 88 | Probable KETOL-acid reductoisomerase IlvC (acetohydroxy-acid reductoisomerase) | Rv3001c.1658  | 5.46E-01 | 8.97E-01 | 0.61 | 7.14E-01 | 9.59E-01 | 12.8 | 12.7 | 12.4 | 12.9 | 12.8 | 12.8 | 12.6 | 13.0 | 12.8 |
| 406 | Rv1808  | MAP0966c | 60 | PPE family protein PPE32                                                       | Rv1808.1797   | 2.21E-01 | 7.31E-01 | 0.72 | 3.81E-01 | 8.90E-01 | 12.5 | 12.1 | 11.3 | 12.8 | 12.3 | 12.8 | 12.1 | 13.5 | 12.6 |
| 407 | Rv2594c | MAP1036  | 83 | Probable crossover junction endodeoxyribonuclease RuvC (hol)                   | Rv2594c.1589  | 2.45E-01 | 7.49E-01 | 0.83 | 1.67E-01 | 8.62E-01 | 12.6 | 12.4 | 11.9 | 12.9 | 12.6 | 12.8 | 12.5 | 13.1 | 12.9 |
| 408 | Rv0628c | MAP0638  | 26 | hypothetical protein                                                           | Rv0628c.801   | 1.42E-01 | 6.83E-01 | 0.89 | 9.52E-02 | 7.98E-01 | 12.5 | 12.0 | 11.3 | 12.7 | 12.2 | 12.8 | 12.4 | 13.2 | 12.8 |
| 409 | Rv0215c | MAP3651c | 87 | Probable acyl-CoA dehydrogenase FadE3                                          | Rv0215c.1795  | 3.02E-01 | 7.74E-01 | 0.78 | 2.62E-01 | 8.76E-01 | 12.6 | 12.2 | 11.5 | 12.9 | 12.5 | 12.8 | 12.0 | 13.6 | 12.7 |
| 410 | Rv1902c | MAP1423  | 87 | Probable sialic acid-transport integral membrane protein NanT                  | Rv1902c.2532  | 2.12E-01 | 7.15E-01 | 0.78 | 2.62     |          |      |      |      |      |      |      |      |      |      |

Table S3 continued

|     |         |          |    |                                                                             |               |          |          |          |          |          |      |      |      |      |      |      |      |      |      |
|-----|---------|----------|----|-----------------------------------------------------------------------------|---------------|----------|----------|----------|----------|----------|------|------|------|------|------|------|------|------|------|
| 424 | Rv3546  | MAP0521c | 86 | Probable acetyl-CoA acetyltransferase FadA5 (acetoacetyl-CoA Rv3546.1224    | 5.56E-01      | 8.97E-01 | 0.67     | 5.48E-01 | 9.11E-01 | 12.7     | 12.4 | 11.6 | 13.3 | 12.4 | 12.8 | 12.4 | 13.2 | 12.9 |      |
| 425 | Rv2608  | MAP1761c | 60 | PPE family protein PPE42                                                    | Rv2608.1505   | 4.11E-01 | 8.35E-01 | 0.72     | 3.81E-01 | 8.90E-01 | 12.6 | 12.4 | 11.6 | 13.1 | 12.3 | 12.8 | 12.4 | 13.2 | 12.7 |
| 426 | Rv0799c | MAP0631c | 80 | hypothetical protein                                                        | Rv0799c.502   | 6.20E-01 | 9.31E-01 | 0.33     | 5.48E-01 | 9.11E-01 | 12.8 | 12.9 | 12.7 | 13.1 | 13.0 | 12.8 | 12.3 | 13.2 | 12.5 |
| 427 | Rv1806  | MAP1507  | 57 | PE family protein PE20                                                      | Rv1806.1780   | 8.06E-01 | 9.65E-01 | 0.56     | 9.05E-01 | 9.80E-01 | 12.7 | 12.6 | 11.7 | 13.6 | 12.7 | 12.8 | 12.4 | 13.1 | 12.9 |
| 428 | Rv1536  | MAP1246  | 88 | Isoleucyl-tRNA synthetase IleS                                              | Rv1536.4030   | 1.38E-01 | 6.83E-01 | 0.72     | 3.81E-01 | 8.90E-01 | 12.6 | 12.2 | 11.9 | 12.4 | 12.2 | 12.8 | 12.1 | 13.4 | 13.0 |
| 429 | Rv0591  | MAP4086  | 76 | Mce-family protein Mce2C                                                    | Rv0591.925    | 8.39E-01 | 9.70E-01 | 0.47     | 1.00E+00 | 1.00E+00 | 12.6 | 12.9 | 11.5 | 14.4 | 12.2 | 12.8 | 12.2 | 13.3 | 13.0 |
| 430 | Rv1110  | MAP2684c | 90 | Probable LYT8-related protein LytB2                                         | Rv1110.791    | 4.89E-02 | 6.27E-01 | 0.89     | 9.52E-02 | 7.98E-01 | 12.5 | 11.9 | 11.5 | 12.4 | 11.8 | 12.8 | 12.2 | 13.3 | 12.6 |
| 431 | Rv3489  | MAP4147  | 39 | hypothetical protein                                                        | Rv3489.2111   | 4.47E-01 | 8.42E-01 | 0.67     | 5.48E-01 | 9.11E-01 | 12.6 | 12.4 | 11.7 | 13.1 | 12.5 | 12.8 | 12.4 | 13.2 | 12.9 |
| 432 | Rv1108c | MAP2686  | 86 | Probable exodeoxyribonuclease VII (large subunit) XseA (exon Rv1108c.4572   | 8.44E-01      | 9.70E-01 | 0.56     | 9.05E-01 | 9.80E-01 | 12.8     | 12.8 | 12.4 | 13.3 | 12.6 | 12.8 | 12.4 | 13.1 | 12.8 |      |
| 433 | Rv0075  | MAP2055  | 39 | Probable aminotransferase                                                   | Rv0075.1091   | 1.02E-01 | 6.48E-01 | 0.78     | 2.62E-01 | 8.76E-01 | 12.6 | 12.2 | 12.0 | 12.5 | 12.2 | 12.8 | 12.3 | 13.2 | 12.8 |
| 434 | Rv2510c | MAP2319c | 73 | hypothetical protein                                                        | Rv2510c.1411  | 9.52E-01 | 9.82E-01 | 0.50     | 1.00E+00 | 1.00E+00 | 12.8 | 12.7 | 12.4 | 13.1 | 12.6 | 12.8 | 12.4 | 13.1 | 12.9 |
| 435 | Rv2380c | MAP2172c | 65 | Peptide synthetase MbtE (peptide synthase)                                  | Rv2380c-s2.37 | 4.82E-01 | 8.70E-01 | 0.72     | 3.81E-01 | 8.90E-01 | 12.7 | 12.5 | 11.9 | 13.1 | 12.3 | 12.8 | 12.4 | 13.1 | 12.9 |
| 436 | Rv3838c | MAP0193  | 81 | Prephenate dehydratase PheA                                                 | Rv3838c.1650  | 9.71E-01 | 9.88E-01 | 0.44     | 9.05E-01 | 9.80E-01 | 12.8 | 12.8 | 12.1 | 13.4 | 12.5 | 12.8 | 12.4 | 13.1 | 12.9 |
| 437 | Rv0982  | MAP0734  | 84 | Two component sensor kinase MprB                                            | Rv0982.2571   | 2.50E-01 | 7.58E-01 | 0.67     | 5.48E-01 | 9.11E-01 | 12.7 | 12.7 | 12.6 | 12.7 | 12.7 | 12.8 | 12.6 | 12.9 | 12.7 |
| 438 | Rv1727  | MAP0250  | 35 | hypothetical protein                                                        | Rv1727.433    | 8.44E-01 | 9.70E-01 | 0.56     | 9.05E-01 | 9.80E-01 | 12.7 | 12.7 | 12.0 | 13.4 | 12.7 | 12.8 | 12.4 | 13.1 | 12.9 |
| 439 | Rv3343c | MAP2253  | 60 | PPE family protein PPE54                                                    | Rv3343c-s2.85 | 3.05E-01 | 7.74E-01 | 0.78     | 2.62E-01 | 8.76E-01 | 12.6 | 12.3 | 11.7 | 12.9 | 12.2 | 12.8 | 12.4 | 13.1 | 12.8 |
| 440 | Rv1311  | MAP2450c | 89 | Probable ATP synthase epsilon chain AtpC                                    | Rv1311.3506   | 9.41E-01 | 9.82E-01 | 0.56     | 9.05E-01 | 9.80E-01 | 12.8 | 12.8 | 12.2 | 13.4 | 12.7 | 12.8 | 12.5 | 13.0 | 12.8 |
| 441 | Rv0929  | MAP0652  | 83 | Phosphate-transport integral membrane ABC transporter PstC;Rv0929.57        | 9.99E-01      | 9.99E-01 | 0.61     | 7.14E-01 | 9.59E-01 | 12.7     | 12.3 | 12.6 | 12.8 | 12.2 | 12.6 | 12.8 | 12.2 | 13.3 | 12.9 |
| 442 | Rv1896c | MAP1622c | 75 | hypothetical protein                                                        | Rv1896c.186   | 6.85E-01 | 9.46E-01 | 0.56     | 9.05E-01 | 9.80E-01 | 12.7 | 12.6 | 12.0 | 13.2 | 12.8 | 12.7 | 12.3 | 13.2 | 12.7 |
| 443 | Rv1115  | MAP2675c | 84 | Possible exported protein                                                   | Rv1115.1601   | 6.43E-01 | 9.33E-01 | 0.39     | 7.14E-01 | 9.59E-01 | 12.8 | 12.9 | 12.3 | 13.6 | 13.2 | 12.7 | 12.3 | 13.1 | 12.8 |
| 444 | Rv0480c | MAP3973c | 78 | Possible amidohydrolase                                                     | Rv0480c.2490  | 6.20E-01 | 9.31E-01 | 0.67     | 5.48E-01 | 9.11E-01 | 12.7 | 12.6 | 12.3 | 12.9 | 12.6 | 12.7 | 12.4 | 13.1 | 12.9 |
| 445 | Rv2131c | MAP0389  | 78 | Monophosphatase CysQ                                                        | Rv2131c.1048  | 5.78E-01 | 9.08E-01 | 0.44     | 9.05E-01 | 9.80E-01 | 12.7 | 12.6 | 12.5 | 12.7 | 12.6 | 12.7 | 12.4 | 13.1 | 12.6 |
| 446 | Rv2151c | MAP1927c | 30 | Possible cell division protein FtsQ                                         | Rv2151c.3669  | 8.01E-01 | 9.65E-01 | 0.44     | 9.05E-01 | 9.80E-01 | 12.8 | 12.8 | 12.4 | 13.2 | 12.8 | 12.7 | 12.5 | 13.0 | 12.8 |
| 447 | Rv3867  | MAP0040  | 29 | ESX-1 secretion-associated protein EspH                                     | Rv3867.3542   | 8.69E-01 | 9.70E-01 | 0.61     | 7.14E-01 | 9.59E-01 | 12.7 | 12.6 | 11.2 | 14.0 | 12.1 | 12.7 | 12.3 | 13.2 | 13.0 |
| 448 | Rv2605c | MAP1729c | 87 | Probable acyl-CoA thioesterase II TesB2 (TEII)                              | Rv2605c.178   | 6.76E-01 | 9.46E-01 | 0.61     | 7.14E-01 | 9.59E-01 | 12.7 | 12.7 | 12.6 | 12.9 | 12.6 | 12.7 | 12.5 | 13.0 | 12.7 |
| 449 | Rv1508c | MAP0286  | 48 | Probable membrane protein                                                   | Rv1508c.3142  | 3.62E-02 | 6.27E-01 | 0.89     | 9.52E-02 | 7.98E-01 | 12.5 | 12.0 | 11.7 | 12.2 | 11.9 | 12.7 | 12.2 | 13.3 | 12.8 |
| 450 | Rv2870c | MAP2940c | 84 | Probable 1-deoxy-D-xylulose 5-phosphate reductoisomerase D Rv2870c.525      | 5.51E-01      | 8.97E-01 | 0.67     | 5.48E-01 | 9.11E-01 | 12.7     | 12.5 | 11.9 | 13.1 | 12.6 | 12.7 | 12.3 | 13.2 | 12.8 |      |
| 451 | Rv0515  | MAP4176  | 68 | Conserved 13E12 repeat family protein                                       | Rv0515.4305   | 4.56E-01 | 8.44E-01 | 0.67     | 5.48E-01 | 9.11E-01 | 12.7 | 12.6 | 12.3 | 12.9 | 12.6 | 12.7 | 12.5 | 13.0 | 12.8 |
| 452 | Rv0461  | MAP3955  | 65 | Probable transmembrane protein                                              | Rv0461.4182   | 9.53E-01 | 9.82E-01 | 0.44     | 9.05E-01 | 9.80E-01 | 12.7 | 12.8 | 12.2 | 13.3 | 12.6 | 12.7 | 12.3 | 13.1 | 12.9 |
| 453 | Rv3116  | MAP3306c | 67 | Probable molybdenum cofactor biosynthesis protein MoeB2 (NRv3116.4139       | 2.98E-01      | 7.74E-01 | 0.78     | 2.62E-01 | 8.76E-01 | 12.6     | 12.3 | 11.7 | 12.9 | 12.2 | 12.7 | 12.3 | 13.2 | 12.6 | 12.6 |
| 454 | Rv2139  | MAP1883  | 81 | Probable dihydroorotate dehydrogenase PyrD                                  | Rv2139.3682   | 9.49E-01 | 9.82E-01 | 0.50     | 1.00E+00 | 1.00E+00 | 12.7 | 12.8 | 12.2 | 13.4 | 12.6 | 12.7 | 12.2 | 13.3 | 12.6 |
| 455 | Rv0509  | MAP4002  | 85 | hypothetical protein                                                        | Rv0509-sA.20: | 4.98E-01 | 8.80E-01 | 0.61     | 7.14E-01 | 9.59E-01 | 12.7 | 12.5 | 12.0 | 13.0 | 12.4 | 12.7 | 12.3 | 13.1 | 12.7 |
| 456 | Rv1565c | MAP1271c | 74 | hypothetical protein                                                        | Rv1565c.4599  | 6.15E-01 | 9.31E-01 | 0.50     | 1.00E+00 | 1.00E+00 | 12.8 | 12.9 | 12.8 | 13.0 | 12.9 | 12.7 | 12.2 | 13.3 | 12.9 |
| 457 | Rv1819c | MAP1531c | 76 | Probable drug-transport transmembrane ATP-binding protein Rv1819c.1701      | 3.07E-01      | 7.75E-01 | 0.67     | 5.48E-01 | 9.11E-01 | 12.6     | 12.3 | 12.3 | 12.4 | 12.3 | 12.7 | 12.0 | 13.4 | 13.0 | 12.8 |
| 458 | Rv1479  | MAP1205  | 93 | Probable transcriptional regulatory protein MoxR1                           | Rv1479.4269   | 3.96E-01 | 8.35E-01 | 0.67     | 5.48E-01 | 9.11E-01 | 12.7 | 12.5 | 12.1 | 12.9 | 12.5 | 12.7 | 12.4 | 13.0 | 12.8 |
| 459 | Rv1456c | MAP1182c | 82 | Probable unidentified antibiotic-transport integral membrane Rv1456c.4246   | 2.08E-01      | 7.15E-01 | 0.72     | 3.81E-01 | 8.90E-01 | 12.6     | 12.4 | 12.1 | 12.6 | 12.4 | 12.7 | 12.3 | 13.1 | 13.0 | 12.7 |
| 460 | Rv3369  | MAP2229  | 27 | hypothetical protein                                                        | Rv3369.2064   | 1.73E-01 | 6.83E-01 | 0.78     | 2.62E-01 | 8.76E-01 | 12.6 | 12.2 | 11.7 | 12.7 | 12.2 | 12.7 | 12.3 | 13.1 | 12.9 |
| 461 | Rv0270  | MAP3714  | 84 | Probable fatty-acid-CoA ligase FadD2 (fatty-acid-CoA synthetase Rv0270.2655 | 7.47E-01      | 9.58E-01 | 0.33     | 5.48E-01 | 9.11E-01 | 12.8     | 12.8 | 12.7 | 12.9 | 12.8 | 12.7 | 12.2 | 13.2 | 12.6 | 12.6 |
| 462 | Rv1320c | MAP2440  | 66 | Possible adenylate cyclase (ATP pyrophosphate-lyase) (adenylyl Rv1320c.2852 | 3.70E-01      | 8.32E-01 | 0.72     | 3.81E-01 | 8.90E-01 | 12.6     | 12.5 | 12.2 | 12.8 | 12.6 | 12.7 | 12.4 | 13.0 | 12.7 | 12.7 |
| 463 | Rv1428c | MAP1160c | 83 | hypothetical protein                                                        | Rv1428c.3368  | 2.63E-01 | 7.62E-01 | 0.72     | 3.81E-01 | 8.90E-01 | 12.5 | 12.2 | 11.6 | 12.8 | 12.2 | 12.7 | 12.2 | 13.3 | 12.7 |
| 464 | Rv2307B | MAP0522  | 29 | Hypothetical glycine rich protein                                           | Rv2307B.2730  | 9.78E-01 | 9.90E-01 | 0.50     | 1.00E+00 | 1.00E+00 | 12.7 | 12.7 | 12.7 | 12.8 | 12.7 | 12.7 | 12.4 | 13.1 | 12.8 |
| 465 | Rv1306  | MAP2455c | 79 | Probable ATP synthase B chain AtpF                                          | Rv1306.1778   | 8.97E-01 | 9.77E-01 | 0.50     | 1.00E+00 | 1.00E+00 | 12.7 | 12.6 | 11.6 | 13.7 | 12.9 | 12.7 | 12.3 | 13.2 | 12.9 |
| 466 | Rv0271c | MAP3716c | 84 | Probable acyl-CoA dehydrogenase FadE6                                       | Rv0271c.4413  | 8.02E-01 | 9.65E-01 | 0.50     | 1.00E+00 | 1.00E+00 | 12.7 | 12.8 | 12.5 | 13.1 | 12.7 | 12.7 | 12.3 | 13.2 | 12.8 |
| 467 | Rv0512  | MAP4005  | 91 | Probable delta-aminolevulinic acid dehydratase HemB (porpho Rv0512.1079     | 3.51E-01      | 8.22E-01 | 0.67     | 5.48E-01 | 9.11E-01 | 12.7     | 12.5 | 12.3 | 12.7 | 12.6 | 12.7 | 12.4 | 13.1 | 12.8 |      |
| 468 | Rv3695  | MAP0356c | 79 | Possible conserved membrane protein                                         | Rv3695.2512   | 4.17E-03 | 6.07E-01 | 1.00     | 2.38E-02 | 7.98E-01 | 12.4 | 11.8 | 11.6 | 12.1 | 12.0 | 12.7 | 12.4 | 13.0 | 12.7 |
| 469 | Rv0500  | MAP3991  | 81 | Probable pyrroline-5-carboxylate reductase ProC (P5CR) (P5C Rv0500.4421     | 4.59E-01      | 8.44E-01 | 0.72     | 3.81E-01 | 8.90E-01 | 12.6     | 12.4 | 11.6 | 13.1 | 12.5 | 12.7 | 12.3 | 13.1 | 12.9 |      |
| 470 | Rv3916c | MAP4342c | 83 | hypothetical protein                                                        | Rv3916c.1323  | 3.90E-01 | 8.35E-01 | 0.78     | 2.62E-01 | 8.76E-01 | 12.6 | 12.4 | 11.8 | 13.0 | 12.1 | 12.7 | 12.5 | 12.9 | 12.7 |
| 471 | Rv2307D | MAP0407c | 29 | Hypothetical protein                                                        | Rv2307D.672   | 7.07E-01 | 9.54E-01 | 0.56     | 9.05E-01 | 9.80E-01 | 12.6 | 12.5 | 11.4 | 13.5 | 12.6 | 12.7 | 12.4 | 13.0 | 12.8 |
| 472 | Rv2892c | MAP1505  | 45 | PPE family protein PPE45                                                    | Rv2892c.1508  | 6.90E-01 | 9.51E-01 | 0.61     | 7.14E-01 | 9.59E-01 | 12.6 | 12.4 | 11.4 | 13.5 | 12.6 | 12.7 | 12.3 | 13.2 | 12.6 |
| 473 | Rv2617c | MAP1162  | 45 | Probable transmembrane protein                                              | Rv2617c.3223  | 9.62E-01 | 9.82E-01 | 0.50     | 1.00E+00 | 1.00E+00 | 12.7 | 12.7 | 12.6 | 12.8 | 12.7 | 12.3 | 12.7 | 13.2 | 12.7 |
| 474 | Rv3728  | MAP3145c | 33 | Probable conserved two-domain membrane protein                              | Rv3728.2579   | 1.61E-01 | 6.83E-01 | 0.67     | 5.48E-01 | 9.11E-01 | 12.6 | 12.3 | 12.2 | 12.4 | 12.3 | 12.7 | 12.2 | 13.2 | 12.7 |
| 475 | Rv1661  | MAP1370  | 70 | Probable polyketide synthase Pks7                                           | Rv1661-s1.28: | 7.04E-01 | 9.52E-01 | 0.56     | 9.05E-01 | 9.80E-01 | 12.6 | 12.5 | 11.5 | 13.5 | 12.1 | 12.7 | 12.3 | 13.1 | 12.9 |
| 476 | Rv0468  | MAP3962  | 91 | 3-hydroxybutyryl-CoA dehydrogenase FadB2 (beta-hydroxybut Rv0468.917        | 2.79E-01      | 7.74E-01 | 0.72     | 3.81E-01 | 8.90E-01 | 12.5     | 12.1 | 11.5 | 12.8 | 12.1 | 12.7 | 12.1 | 13.3 | 12.8 | 12.7 |
| 477 | Rv0355c | MAP3939c | 63 | PPE family protein PPE8                                                     | Rv0355c-s1.31 | 1.05E-02 | 6.27E-01 | 0.94     | 4.76E-02 | 7.98E-01 | 12.5 | 12.1 | 11.9 | 12.3 | 12.1 | 12.7 | 12.4 | 13.0 | 12.8 |
| 478 | Rv0410c | MAP3893c | 86 | Serine/threonine-protein kinase PknG (protein kinase G) (STPK Rv0410c.3154  | 8.82E-01      | 9.73E-01 | 0.56     | 9.05E-01 | 9.80E-01 | 12.7     | 12.7 | 12.4 | 12.9 | 12.7 | 12.7 | 12.5 | 12.9 | 12.7 | 12.7 |
| 479 | Rv0438c | MAP3932c | 81 | Probable molybdopterin biosynthesis protein MoeA2                           | Rv0438c.518   | 9.21E-01 | 9.81E-01 | 0.56     | 9.05E-01 | 9.80E-01 | 12.7 | 12.7 | 12.1 | 13.2 | 12.7 | 12.7 | 12.3 | 13.1 | 12.6 |
| 480 | Rv1917c | MAP3939c | 57 | PPE family protein PPE34                                                    | Rv1917c.3461  | 5.43E-01 | 8.97E-01 | 0.72     | 3.81E-01 | 8.90E-01 | 12.7 | 12.6 | 12.4 | 12.7 | 12.6 | 12.7 | 12.3 | 13.1 | 12.8 |
| 481 | Rv0451c | MAP1241c | 60 | Probable conserved membrane protein MmpS4                                   | Rv0451c.1517  | 9.24E-01 | 9.81E-01 | 0.50     | 1.00E+00 | 1.00E+00 | 12.7 | 1    |      |      |      |      |      |      |      |

Table S3 continued

|     |         |          |    |                                                                         |              |          |          |          |          |          |      |      |      |      |      |      |      |      |      |
|-----|---------|----------|----|-------------------------------------------------------------------------|--------------|----------|----------|----------|----------|----------|------|------|------|------|------|------|------|------|------|
| 495 | Rv0109  | MAP4144  | 61 | PE-PGRS family protein PE_PGRS1                                         | Rv0109.1405  | 6.51E-01 | 9.35E-01 | 0.61     | 7.14E-01 | 9.59E-01 | 12.6 | 12.4 | 11.7 | 13.2 | 12.6 | 12.7 | 12.1 | 13.2 | 12.8 |
| 496 | Rv2881c | MAP2944c | 72 | Probable integral membrane phosphatidate cytidylyltransferase           | Rv2881c.2511 | 4.55E-01 | 8.44E-01 | 0.67     | 5.48E-01 | 9.11E-01 | 12.6 | 12.4 | 12.2 | 12.7 | 12.5 | 12.7 | 12.2 | 13.2 | 12.7 |
| 497 | Rv0099  | MAP2747  | 27 | Possible fatty-acyl-CoA ligase FadD17 (fatty-acyl-CoA synthetase)       | Rv0099.926   | 3.54E-01 | 8.22E-01 | 0.67     | 5.48E-01 | 9.11E-01 | 12.6 | 12.4 | 12.2 | 12.7 | 12.5 | 12.7 | 12.3 | 13.0 | 12.7 |
| 498 | Rv2589  | MAP1041c | 85 | 4-aminobutyrate aminotransferase GabT (gamma-amino-N-bur)               | Rv2589.2839  | 2.83E-02 | 6.27E-01 | 1.00     | 2.38E-02 | 7.98E-01 | 12.5 | 12.0 | 11.7 | 12.3 | 12.1 | 12.7 | 12.5 | 12.8 | 12.7 |
| 499 | Rv2025c | MAP2784  | 40 | hypothetical protein                                                    | Rv2025c.3392 | 7.67E-01 | 9.65E-01 | 0.61     | 7.14E-01 | 9.59E-01 | 12.6 | 12.6 | 12.4 | 12.8 | 12.6 | 12.7 | 12.3 | 13.1 | 12.7 |
| 500 | Rv0146  | MAP3564  | 75 | Possible S-adenosylmethionine-dependent methyltransferase               | Rv0146.3957  | 4.98E-01 | 8.80E-01 | 0.67     | 5.48E-01 | 9.11E-01 | 12.6 | 12.3 | 11.6 | 13.1 | 12.1 | 12.7 | 12.2 | 13.1 | 12.7 |
| 501 | Rv1633  | MAP1335  | 95 | Probable excinuclease ABC (subunit B-helicase) UvrB                     | Rv1633.546   | 3.56E-01 | 8.22E-01 | 0.72     | 3.81E-01 | 8.90E-01 | 12.6 | 12.4 | 12.0 | 12.8 | 12.2 | 12.7 | 12.2 | 13.1 | 12.7 |
| 502 | Rv2586c | MAP1044  | 74 | Probable protein-export membrane protein SecF                           | Rv2586c.1384 | 2.79E-01 | 7.74E-01 | 0.33     | 5.48E-01 | 9.11E-01 | 12.8 | 13.1 | 12.7 | 13.4 | 13.0 | 12.7 | 12.1 | 13.2 | 12.9 |
| 503 | Rv3312A | MAP0342c | 74 | Secreted protein antigen                                                | Rv3312A.3868 | 1.95E-01 | 6.98E-01 | 0.72     | 3.81E-01 | 8.90E-01 | 12.5 | 12.2 | 11.8 | 12.6 | 12.1 | 12.7 | 12.2 | 13.1 | 12.6 |
| 504 | Rv1867  | MAP0898  | 78 | hypothetical protein                                                    | Rv1867.4584  | 8.16E-01 | 9.65E-01 | 0.67     | 5.48E-01 | 9.11E-01 | 12.6 | 12.6 | 12.5 | 12.7 | 12.6 | 12.7 | 12.1 | 13.2 | 12.9 |
| 505 | Rv2159c | MAP1379  | 33 | hypothetical protein                                                    | Rv2159c.3960 | 7.23E-01 | 9.56E-01 | 0.72     | 3.81E-01 | 8.90E-01 | 12.6 | 12.4 | 11.3 | 13.5 | 12.0 | 12.7 | 12.1 | 13.2 | 12.6 |
| 506 | Rv2195  | MAP1934  | 83 | Probable rieske iron-sulfur protein QcrA                                | Rv2195.3498  | 5.49E-01 | 8.97E-01 | 0.39     | 7.14E-01 | 9.59E-01 | 12.8 | 13.2 | 11.8 | 14.6 | 12.8 | 12.7 | 12.3 | 13.0 | 12.7 |
| 507 | Rv1697  | MAP1404  | 90 | hypothetical protein                                                    | Rv1697.2688  | 9.95E-01 | 9.98E-01 | 0.44     | 9.05E-01 | 9.80E-01 | 12.7 | 12.7 | 12.3 | 13.0 | 12.6 | 12.7 | 12.4 | 12.9 | 12.8 |
| 508 | Rv2999  | MAP1193c | 31 | Probable conserved lipoprotein LppY                                     | Rv2999.3390  | 5.67E-01 | 9.03E-01 | 0.50     | 1.00E+00 | 1.00E+00 | 12.6 | 12.6 | 12.5 | 12.7 | 12.6 | 12.7 | 12.5 | 12.9 | 12.6 |
| 509 | Rv0200  | MAP0767c | 30 | Possible conserved transmembrane protein                                | Rv0200.4127  | 5.53E-01 | 8.97E-01 | 0.44     | 9.05E-01 | 9.80E-01 | 12.7 | 12.9 | 12.3 | 13.5 | 12.8 | 12.7 | 12.4 | 13.0 | 12.7 |
| 510 | Rv3818  | MAP0204c | 87 | hypothetical protein                                                    | Rv3818.3150  | 2.37E-01 | 7.47E-01 | 0.72     | 3.81E-01 | 8.90E-01 | 12.6 | 12.3 | 12.0 | 12.7 | 12.2 | 12.7 | 12.4 | 12.9 | 12.8 |
| 511 | Rv0418  | MAP3906  | 80 | Probable lipoprotein aminopeptidase LplL                                | Rv0418.249   | 2.98E-01 | 7.74E-01 | 0.61     | 7.14E-01 | 9.59E-01 | 12.6 | 12.4 | 12.1 | 12.6 | 12.3 | 12.7 | 12.2 | 13.1 | 12.7 |
| 512 | Rv1006  | MAP0948  | 68 | hypothetical protein                                                    | Rv1006.903   | 3.54E-01 | 8.22E-01 | 0.67     | 5.48E-01 | 9.11E-01 | 12.6 | 12.4 | 12.1 | 12.6 | 12.3 | 12.7 | 12.1 | 13.2 | 12.7 |
| 513 | Rv1245c | MAP2537  | 85 | Probable short-chain type dehydrogenase/reductase                       | Rv1245c.2212 | 1.73E-01 | 6.83E-01 | 0.78     | 2.62E-01 | 8.76E-01 | 12.5 | 12.1 | 11.6 | 12.6 | 12.3 | 12.7 | 12.3 | 13.0 | 12.8 |
| 514 | Rv2281  | MAP4041c | 31 | Putative phosphate-transport permease PitB                              | Rv2281.1695  | 6.20E-01 | 9.31E-01 | 0.50     | 1.00E+00 | 1.00E+00 | 12.6 | 12.5 | 12.5 | 12.7 | 12.6 | 12.7 | 12.5 | 12.9 | 12.6 |
| 515 | Rv2666  | MAP3759c | 50 | Probable transposase for insertion sequence element IS1081 (fRv2666.476 | 8.02E-01     | 9.65E-01 | 0.50     | 1.00E+00 | 1.00E+00 | 12.6     | 12.5 | 11.6 | 13.4 | 12.5 | 12.6 | 12.3 | 13.0 | 12.5 |      |
| 516 | Rv2266  | MAP2015  | 83 | Probable cytochrome P450 124 Cyp124                                     | Rv2266.804   | 1.76E-01 | 6.83E-01 | 0.67     | 5.48E-01 | 9.11E-01 | 12.4 | 11.9 | 11.2 | 12.6 | 11.7 | 12.6 | 12.0 | 13.3 | 12.5 |
| 517 | Rv1366  | MAP1047  | 27 | Hypothetical protein                                                    | Rv1366.477   | 2.97E-01 | 7.74E-01 | 0.72     | 3.81E-01 | 8.90E-01 | 12.5 | 12.2 | 11.5 | 12.8 | 12.4 | 12.6 | 12.2 | 13.1 | 12.8 |
| 518 | Rv3877  | MAP2598c | 26 | ESX conserved component EccD1 ESX-1 type VII secretion system           | Rv3877.2660  | 7.43E-01 | 9.57E-01 | 0.50     | 1.00E+00 | 1.00E+00 | 12.6 | 12.5 | 12.0 | 13.1 | 12.7 | 12.6 | 12.2 | 13.1 | 12.6 |
| 519 | Rv2519  | MAP4144  | 41 | PE family protein PE26                                                  | Rv2519.4388  | 7.76E-01 | 9.65E-01 | 0.44     | 9.05E-01 | 9.80E-01 | 12.7 | 12.7 | 12.4 | 13.1 | 12.8 | 12.6 | 12.2 | 13.0 | 12.8 |
| 520 | Rv0535  | MAP4030  | 78 | Probable 5'-methylthioadenosine phosphorylase Pnp (MTA phr)             | Rv0535.4227  | 2.49E-02 | 6.27E-01 | 0.83     | 1.67E-01 | 8.62E-01 | 12.5 | 12.3 | 12.2 | 12.4 | 12.3 | 12.6 | 12.4 | 12.9 | 12.7 |
| 521 | Rv0204c | MAP3639c | 84 | Probable conserved transmembrane protein                                | Rv0204c.230  | 4.31E-01 | 8.35E-01 | 0.33     | 5.48E-01 | 9.11E-01 | 12.7 | 12.8 | 12.6 | 12.9 | 12.8 | 12.6 | 12.4 | 12.9 | 12.6 |
| 522 | Rv0752c | MAP4214c | 88 | Probable acyl-CoA dehydrogenase FadE9                                   | Rv0752c.1507 | 5.64E-01 | 9.02E-01 | 0.33     | 5.48E-01 | 9.11E-01 | 12.9 | 13.3 | 11.5 | 15.1 | 12.7 | 12.6 | 12.0 | 13.3 | 12.6 |
| 523 | Rv2927c | MAP2997c | 93 | hypothetical protein                                                    | Rv2927c.739  | 9.61E-01 | 9.82E-01 | 0.61     | 7.14E-01 | 9.59E-01 | 12.6 | 12.6 | 11.5 | 13.7 | 12.6 | 12.6 | 12.2 | 13.1 | 12.7 |
| 524 | Rv2957  | MAP1234  | 69 | Possible glycosyl transferase                                           | Rv2957.1917  | 5.65E-02 | 6.39E-01 | 0.89     | 9.52E-02 | 7.98E-01 | 12.4 | 12.0 | 11.6 | 12.3 | 12.1 | 12.6 | 12.2 | 13.1 | 12.5 |
| 525 | Rv2196  | MAP1935  | 89 | Probable ubiquinol-cytochrome C reductase QcrB (cytochrome b560)        | Rv2196.30    | 9.57E-01 | 9.82E-01 | 0.50     | 1.00E+00 | 1.00E+00 | 12.5 | 12.6 | 12.2 | 13.1 | 12.5 | 12.6 | 12.4 | 12.9 | 12.7 |
| 526 | Rv3388  | MAP4144  | 64 | PE-PGRS family protein PE_PGRS52                                        | Rv3388.3552  | 2.02E-01 | 7.15E-01 | 0.72     | 3.81E-01 | 8.90E-01 | 12.6 | 12.2 | 11.8 | 12.5 | 12.1 | 12.6 | 12.1 | 13.2 | 12.7 |
| 527 | Rv3610c | MAP0448  | 85 | Membrane-bound protease FtsH (cell division protein)                    | Rv3610c.4419 | 7.93E-01 | 9.65E-01 | 0.44     | 9.05E-01 | 9.80E-01 | 12.7 | 12.7 | 12.5 | 12.9 | 12.8 | 12.6 | 12.2 | 13.1 | 12.7 |
| 528 | Rv2449c | MAP2272c | 80 | hypothetical protein                                                    | Rv2449c.1104 | 6.84E-01 | 9.46E-01 | 0.56     | 9.05E-01 | 9.80E-01 | 12.6 | 12.5 | 12.2 | 12.9 | 12.5 | 12.6 | 12.2 | 13.0 | 12.6 |
| 529 | Rv3752c | MAP0279  | 92 | Possible cytidine/deoxycytidylate deaminase                             | Rv3752c.1868 | 9.53E-01 | 9.82E-01 | 0.44     | 9.05E-01 | 9.80E-01 | 12.6 | 12.6 | 12.0 | 13.3 | 12.6 | 12.6 | 12.3 | 13.0 | 12.7 |
| 530 | Rv0174  | MAP3609  | 77 | Mce-family protein Mce1F                                                | Rv0174.1209  | 1.82E-01 | 6.88E-01 | 0.78     | 2.62E-01 | 8.76E-01 | 12.4 | 12.1 | 11.7 | 12.5 | 12.3 | 12.6 | 12.0 | 13.2 | 12.4 |
| 531 | Rv2834c | MAP2091  | 32 | Probable Sn-glycerol-3-phosphate transport integral membrane protein    | Rv2834c.1339 | 9.62E-01 | 9.82E-01 | 0.56     | 9.05E-01 | 9.80E-01 | 12.6 | 12.6 | 12.1 | 13.1 | 12.4 | 12.6 | 12.1 | 13.2 | 12.9 |
| 532 | Rv1484  | MAP1210  | 89 | NADH-dependent enoyl-[acyl-carrier-protein] reductase InhA (Rv1484.4234 | 3.13E-01     | 7.78E-01 | 0.67     | 5.48E-01 | 9.11E-01 | 12.5     | 12.3 | 11.9 | 12.7 | 12.3 | 12.6 | 12.2 | 13.0 | 12.8 |      |
| 533 | Rv2741  | MAP4144  | 64 | PE-PGRS family protein PE_PGRS47                                        | Rv2741.2082  | 8.21E-01 | 9.68E-01 | 0.61     | 7.14E-01 | 9.59E-01 | 12.6 | 12.5 | 11.5 | 13.5 | 12.1 | 12.6 | 12.2 | 13.0 | 12.7 |
| 534 | Rv2678c | MAP2799c | 78 | Probable uroporphyrinogen decarboxylase HemE (uroporphyrinogen III      | Rv2678c.3971 | 5.73E-01 | 9.06E-01 | 0.72     | 3.81E-01 | 8.90E-01 | 12.5 | 12.4 | 11.8 | 13.0 | 12.4 | 12.6 | 12.2 | 13.0 | 12.8 |
| 535 | Rv2468c | MAP2288c | 81 | hypothetical protein                                                    | Rv2468c.3889 | 8.07E-01 | 9.65E-01 | 0.61     | 7.14E-01 | 9.59E-01 | 12.6 | 12.5 | 12.0 | 13.1 | 12.4 | 12.6 | 12.3 | 12.9 | 12.6 |
| 536 | Rv1059  | MAP0332  | 61 | hypothetical protein                                                    | Rv1059.487   | 4.22E-01 | 8.35E-01 | 0.78     | 2.62E-01 | 8.76E-01 | 12.4 | 12.0 | 11.0 | 13.1 | 12.1 | 12.6 | 11.9 | 13.3 | 12.6 |
| 537 | Rv0980c | MAP1144  | 55 | PE-PGRS family protein PE_PGRS18                                        | Rv0980c.3707 | 3.04E-01 | 7.74E-01 | 0.78     | 2.62E-01 | 8.76E-01 | 12.5 | 12.4 | 12.2 | 12.6 | 12.4 | 12.6 | 12.3 | 12.9 | 12.7 |
| 538 | Rv3533c | MAP3939c | 57 | PPE family protein PPE62                                                | Rv3533c.54   | 2.04E-01 | 7.15E-01 | 0.17     | 1.67E-01 | 8.62E-01 | 12.8 | 13.1 | 12.6 | 13.7 | 13.2 | 12.6 | 12.3 | 12.9 | 12.7 |
| 539 | Rv0552  | MAP2524c | 79 | hypothetical protein                                                    | Rv0552.1700  | 5.24E-01 | 8.93E-01 | 0.44     | 9.05E-01 | 9.80E-01 | 12.7 | 12.8 | 12.4 | 13.2 | 13.0 | 12.6 | 12.3 | 12.9 | 12.6 |
| 540 | Rv0645c | MAP4117c | 73 | Methoxy mycolic acid synthase 1 MmaA1 (methyl mycolic acid              | Rv0645c.2202 | 6.75E-01 | 9.46E-01 | 0.39     | 7.14E-01 | 9.59E-01 | 12.6 | 12.7 | 12.3 | 13.2 | 12.9 | 12.6 | 12.2 | 13.0 | 12.7 |
| 541 | Rv2077c | MAP1217c | 61 | Possible conserved transmembrane protein                                | Rv2077c.783  | 9.43E-01 | 9.82E-01 | 0.56     | 9.05E-01 | 9.80E-01 | 12.6 | 12.6 | 12.0 | 13.1 | 12.4 | 12.6 | 12.2 | 13.0 | 12.7 |
| 542 | Rv1635c | MAP1338c | 68 | Probable mannosyltransferase Probable conserved transmembrane           | Rv1635c.1527 | 6.08E-01 | 9.25E-01 | 0.61     | 7.14E-01 | 9.59E-01 | 12.5 | 12.3 | 11.6 | 13.1 | 12.3 | 12.6 | 12.2 | 13.1 | 12.6 |
| 543 | Rv0743c | MAP1322  | 35 | Hypothetical protein                                                    | Rv0743c.432  | 4.26E-01 | 8.35E-01 | 0.72     | 3.81E-01 | 8.90E-01 | 12.5 | 12.3 | 11.6 | 12.9 | 12.5 | 12.6 | 12.2 | 13.0 | 12.8 |
| 544 | Rv1631  | MAP1326  | 77 | Probable dephospho-CoA kinase CoaE (dephosphocoenzyme A                 | Rv1631.4276  | 3.00E-01 | 7.74E-01 | 0.67     | 5.48E-01 | 9.11E-01 | 12.5 | 12.2 | 11.8 | 12.7 | 12.1 | 12.6 | 12.2 | 13.0 | 12.6 |
| 545 | Rv0420c | MAP0118  | 43 | Possible transmembrane protein                                          | Rv0420c.4462 | 7.43E-01 | 9.57E-01 | 0.50     | 1.00E+00 | 1.00E+00 | 12.6 | 12.7 | 12.5 | 12.8 | 12.7 | 12.6 | 12.3 | 12.9 | 12.7 |
| 546 | Rv3205c | MAP3305c | 87 | hypothetical protein                                                    | Rv3205c.958  | 9.40E-02 | 6.48E-01 | 0.78     | 2.62E-01 | 8.76E-01 | 12.5 | 12.2 | 12.0 | 12.4 | 12.2 | 12.6 | 12.3 | 12.9 | 12.7 |
| 547 | Rv1501  | MAP3160  | 36 | hypothetical protein                                                    | Rv1501.766   | 1.73E-01 | 6.83E-01 | 0.78     | 2.62E-01 | 8.76E-01 | 12.4 | 11.9 | 11.3 | 12.5 | 12.2 | 12.6 | 12.0 | 13.2 | 12.4 |
| 548 | Rv1325c | MAP4144  | 62 | hypothetical protein                                                    | Rv1325c.1148 | 3.39E-01 | 8.15E-01 | 0.61     | 7.14E-01 | 9.59E-01 | 12.5 | 12.2 | 11.6 | 12.7 | 12.1 | 12.6 | 12.1 | 13.1 | 12.7 |
| 549 | Rv2376c | MAP2167c | 75 | Low molecular weight antigen CFP2 (low molecular weight protein         | Rv2376c.1489 | 4.53E-01 | 8.44E-01 | 0.72     | 3.81E-01 | 8.90E-01 | 12.4 | 12.1 | 11.0 | 13.2 | 12.2 | 12.6 | 12.2 | 13.0 | 12.5 |
| 550 | Rv2773c | MAP2878c | 91 | Dihydrodipicolinate reductase DapB (DHPR)                               | Rv2773c.450  | 4.21E-01 | 8.35E-01 | 0.72     | 3.81E-01 | 8.90E-01 | 12.5 | 12.2 | 11.6 | 12.9 | 12.5 | 12.6 | 12.2 | 13.0 | 12.6 |
| 551 | Rv2919c | MAP2987c | 98 | Probable nitrogen regulatory protein P-II GlnB                          | Rv2919c.913  | 3.87E-01 | 8.35E-01 | 0.72     | 3.81E-01 | 8.90E-01 | 12.5 | 12.4 | 12.0 | 12.7 | 12.3 | 12.6 | 12.3 | 12.9 | 12.8 |
| 552 | Rv1281c | MAP2490  | 84 | Probable oligopeptide-transport ATP-binding protein ABC transporter     | Rv1281c.246  | 8.89E-02 | 6.48E-01 | 0.89     | 9.52E-02 | 7.98E-01 | 12.4 | 12.0 |      |      |      |      |      |      |      |

## Table S3 continued

|     |         |          |    |                                                                                       |              |          |          |          |          |          |      |      |      |      |      |      |      |      |      |
|-----|---------|----------|----|---------------------------------------------------------------------------------------|--------------|----------|----------|----------|----------|----------|------|------|------|------|------|------|------|------|------|
| 566 | Rv2937  | MAP1237c | 31 | Daurorubicin-dim-transport integral membrane protein ABC tr Rv2937.2203               | 6.92E-01     | 9.51E-01 | 0.61     | 7.14E-01 | 9.59E-01 | 12.5     | 12.4 | 12.1 | 12.8 | 12.5 | 12.6 | 12.0 | 13.1 | 12.6 |      |
| 567 | Rv2174  | MAP1912  | 82 | Alpha(1->6)mannosyltransferase Possible conserved integral m Rv2174.2572              | 5.10E-01     | 8.89E-01 | 0.67     | 5.48E-01 | 9.11E-01 | 12.5     | 12.4 | 12.1 | 12.6 | 12.4 | 12.6 | 12.1 | 13.0 | 12.7 |      |
| 568 | Rv2347c | MAP1508  | 88 | Putative ESAT-6 like protein EsxP (ESAT-6 like protein 7)                             | 5.11E-01     | 8.89E-01 | 0.61     | 7.14E-01 | 9.59E-01 | 12.4     | 12.2 | 11.3 | 13.1 | 12.2 | 12.6 | 12.3 | 12.8 | 12.6 |      |
| 569 | Rv0246  | MAP1796c | 32 | Probable conserved integral membrane protein                                          | Rv0246.227   | 9.24E-01 | 9.81E-01 | 0.56     | 9.05E-01 | 9.80E-01 | 12.6 | 12.6 | 11.9 | 13.3 | 12.3 | 12.6 | 12.2 | 12.9 | 12.5 |
| 570 | Rv0024  | MAP0036  | 68 | Putative secreted protein P60-related protein                                         | Rv0024.172   | 6.45E-01 | 9.34E-01 | 0.44     | 9.05E-01 | 9.80E-01 | 12.6 | 12.6 | 12.4 | 12.9 | 12.7 | 12.6 | 12.2 | 12.9 | 12.5 |
| 571 | Rv0751c | MAP0744c | 81 | Probable 3-hydroxyisobutyrate dehydrogenase MmsB (hibadh) Rv0751c.1340                | 8.52E-01     | 9.70E-01 | 0.50     | 1.00E+00 | 1.00E+00 | 12.5     | 12.5 | 12.0 | 13.0 | 12.3 | 12.5 | 12.2 | 12.9 | 12.7 |      |
| 572 | Rv3067  | MAP3418  | 44 | hypothetical protein                                                                  | Rv3067.3306  | 4.80E-01 | 8.69E-01 | 0.67     | 5.48E-01 | 9.11E-01 | 12.5 | 12.3 | 11.9 | 12.8 | 12.4 | 12.5 | 12.3 | 12.8 | 12.5 |
| 573 | Rv3826  | MAP3752  | 62 | Probable fatty-acid-AMP ligase FadD23 (fatty-acid-AMP synthase) Rv3826.638            | 7.20E-01     | 9.56E-01 | 0.61     | 7.14E-01 | 9.59E-01 | 12.5     | 12.3 | 11.2 | 13.4 | 12.0 | 12.5 | 12.1 | 13.0 | 12.6 |      |
| 574 | Rv0713  | MAP4173  | 65 | Probable conserved transmembrane protein                                              | Rv0713.1479  | 5.45E-01 | 8.97E-01 | 0.67     | 5.48E-01 | 9.11E-01 | 12.5 | 12.3 | 11.5 | 13.0 | 12.3 | 12.5 | 12.2 | 12.9 | 12.5 |
| 575 | Rv3203  | MAP2932c | 67 | Possible lipase LipV                                                                  | Rv3203.3906  | 8.66E-01 | 9.70E-01 | 0.61     | 7.14E-01 | 9.59E-01 | 12.5 | 12.4 | 11.4 | 13.5 | 12.0 | 12.5 | 12.2 | 12.9 | 12.5 |
| 576 | Rv2185c | MAP1923c | 76 | Conserved protein TB16.3                                                              | Rv2185c.1486 | 4.14E-01 | 8.35E-01 | 0.72     | 3.81E-01 | 8.90E-01 | 12.4 | 12.2 | 11.4 | 12.9 | 12.1 | 12.5 | 12.3 | 12.8 | 12.5 |
| 577 | Rv3310  | MAP3432  | 75 | Acid phosphatase (acid phosphomonoesterase) (phosphomonoesterase) Rv3310.1919         | 2.52E-01     | 7.60E-01 | 0.72     | 3.81E-01 | 8.90E-01 | 12.5     | 12.3 | 12.1 | 12.5 | 12.4 | 12.5 | 12.2 | 12.9 | 12.7 |      |
| 578 | Rv3140  | MAP3189  | 88 | Probable acyl-CoA dehydrogenase FadE23                                                | Rv3140.2058  | 3.71E-01 | 8.32E-01 | 0.33     | 5.48E-01 | 9.11E-01 | 12.7 | 12.9 | 12.3 | 13.6 | 12.9 | 12.5 | 12.1 | 13.0 | 12.6 |
| 579 | Rv1566c | MAP1272c | 77 | Possible Inv protein                                                                  | Rv1566c.1773 | 6.30E-01 | 9.31E-01 | 0.67     | 5.48E-01 | 9.11E-01 | 12.4 | 12.1 | 10.8 | 13.4 | 12.1 | 12.5 | 11.9 | 13.2 | 12.5 |
| 580 | Rv3527  | MAP0538c | 77 | Hypothetical protein                                                                  | Rv3527.422   | 6.72E-01 | 9.46E-01 | 0.61     | 7.14E-01 | 9.59E-01 | 12.5 | 12.3 | 11.4 | 13.2 | 12.4 | 12.5 | 12.2 | 12.9 | 12.7 |
| 581 | Rv1866  | MAP0708  | 78 | hypothetical protein                                                                  | Rv1866.1131  | 6.42E-01 | 9.33E-01 | 0.44     | 9.05E-01 | 9.80E-01 | 12.6 | 12.8 | 12.0 | 13.6 | 12.6 | 12.5 | 12.2 | 12.9 | 12.8 |
| 582 | Rv2902c | MAP2970c | 84 | Probable ribonuclease HII protein RnhB (RNase HII)                                    | Rv2902c.4233 | 6.55E-01 | 9.36E-01 | 0.44     | 9.05E-01 | 9.80E-01 | 12.6 | 12.8 | 11.9 | 12.9 | 12.5 | 12.5 | 12.2 | 12.9 | 12.7 |
| 583 | Rv2155c | MAP1899c | 79 | Probable UDP-N-acetylmuramoylalanine-D-glutamate ligase M Rv2155c.4583                | 5.66E-01     | 9.02E-01 | 0.61     | 7.14E-01 | 9.59E-01 | 12.5     | 12.4 | 12.1 | 13.7 | 12.3 | 12.5 | 12.2 | 12.9 | 12.6 |      |
| 584 | Rv0632c | MAP4102c | 81 | Probable enoyl-CoA hydratase EchA3 (enoyl hydratase) (unsaturase) Rv0632c.3523        | 5.20E-01     | 8.93E-01 | 0.44     | 9.05E-01 | 9.80E-01 | 12.7     | 13.0 | 11.9 | 14.1 | 12.7 | 12.5 | 12.2 | 12.8 | 12.6 |      |
| 585 | Rv0517  | MAP4008  | 77 | Possible membrane acyltransferase                                                     | Rv0517.516   | 8.95E-01 | 9.77E-01 | 0.56     | 9.05E-01 | 9.80E-01 | 12.5 | 12.6 | 11.5 | 13.4 | 12.6 | 12.5 | 11.8 | 13.2 | 12.8 |
| 586 | Rv3497c | MAP0110  | 81 | Mce-family protein Mce4C                                                              | Rv3497c.2084 | 9.15E-01 | 9.81E-01 | 0.67     | 5.48E-01 | 9.11E-01 | 12.6 | 12.6 | 11.6 | 13.6 | 12.2 | 12.5 | 12.3 | 12.8 | 12.5 |
| 587 | Rv3336c | MAP3453c | 86 | Probable tryptophanyl-tRNA synthetase TrpS (tryptophan--tRNA Rv3336c.4248             | 7.36E-01     | 9.57E-01 | 0.50     | 1.00E+00 | 1.00E+00 | 12.5     | 12.4 | 11.6 | 13.1 | 12.0 | 12.5 | 11.9 | 13.1 | 12.5 |      |
| 588 | Rv3234c | MAP3347c | 83 | Putative triacylglycerol synthase (diacylglycerol) acyltransferase Rv3234c.2205       | 4.49E-02     | 6.27E-01 | 0.78     | 2.62E-01 | 8.76E-01 | 12.4     | 12.0 | 11.9 | 12.1 | 12.0 | 12.5 | 12.1 | 12.9 | 12.8 |      |
| 589 | Rv0815c | MAP0645c | 90 | Probable thiosulfate sulfurtransferase CysA2 (rhodanese-like p Rv0815c.767            | 1.15E-01     | 6.48E-01 | 0.89     | 9.52E-02 | 7.98E-01 | 12.3     | 11.7 | 11.1 | 12.4 | 11.8 | 12.5 | 12.1 | 13.0 | 12.7 |      |
| 590 | Rv0462  | MAP3956  | 90 | Dihydroipoamide dehydrogenase LpdC (lipoamide reductase) (Rv0462.2634                 | 6.61E-01     | 9.36E-01 | 0.44     | 9.05E-01 | 9.80E-01 | 12.6     | 12.7 | 12.2 | 13.2 | 12.5 | 12.5 | 12.2 | 12.9 | 12.6 |      |
| 591 | Rv1869c | MAP1579c | 77 | Probable reductase                                                                    | Rv1869c.2259 | 2.27E-01 | 7.31E-01 | 0.72     | 3.81E-01 | 8.90E-01 | 12.3 | 12.0 | 11.4 | 12.5 | 11.8 | 12.5 | 12.0 | 13.1 | 12.7 |
| 592 | Rv0104  | MAP0938  | 37 | hypothetical protein                                                                  | Rv0104.3143  | 8.01E-01 | 9.65E-01 | 0.61     | 7.14E-01 | 9.59E-01 | 12.5 | 12.4 | 11.2 | 13.5 | 12.2 | 12.5 | 12.2 | 12.9 | 12.5 |
| 593 | Rv3136  | MAP3184  | 53 | PPE family protein PPE51                                                              | Rv3136.3214  | 6.85E-01 | 9.46E-01 | 0.56     | 9.05E-01 | 9.80E-01 | 12.5 | 12.4 | 11.7 | 13.0 | 12.1 | 12.5 | 12.1 | 13.0 | 12.6 |
| 594 | Rv1135c | MAP3939c | 58 | PPE family protein PPE16                                                              | Rv1135c.252  | 8.10E-01 | 9.65E-01 | 0.56     | 9.05E-01 | 9.80E-01 | 12.5 | 12.4 | 11.3 | 13.4 | 12.1 | 12.5 | 12.1 | 13.0 | 12.5 |
| 595 | Rv1385  | MAP1120  | 82 | Probable orotidine 5'-phosphate decarboxylase PyrF (OMP decarboxylase) Rv1385.3657    | 7.18E-01     | 9.56E-01 | 0.39     | 7.14E-01 | 9.59E-01 | 12.5     | 12.6 | 12.2 | 13.0 | 12.6 | 12.5 | 12.2 | 12.8 | 12.5 |      |
| 596 | Rv2324  | MAP2096  | 91 | Probable transcriptional regulatory protein (probably AsnC-fam) Rv2324.2156           | 7.17E-01     | 9.56E-01 | 0.50     | 1.00E+00 | 1.00E+00 | 12.5     | 12.4 | 12.2 | 12.6 | 12.5 | 12.5 | 12.2 | 12.8 | 12.4 |      |
| 597 | Rv0978c | MAP4144  | 55 | PE-PGRS family protein PE_PGRS17                                                      | Rv0978c.3097 | 8.43E-01 | 9.70E-01 | 0.61     | 7.14E-01 | 9.59E-01 | 12.5 | 12.4 | 11.6 | 13.1 | 12.6 | 12.5 | 12.0 | 13.0 | 12.7 |
| 598 | Rv0222  | MAP3658  | 85 | Probable enoyl-CoA hydratase EchA1 (enoyl hydratase) (unsaturase) Rv0222.3813         | 9.23E-01     | 9.81E-01 | 0.44     | 9.05E-01 | 9.80E-01 | 12.5     | 12.5 | 12.0 | 13.0 | 12.7 | 12.5 | 12.1 | 12.9 | 12.5 |      |
| 599 | Rv1781c | MAP1500c | 81 | Probable 4-alpha-glucanotransferase MalQ (amylomaltase) (di) Rv1781c.4021             | 4.44E-01     | 8.42E-01 | 0.67     | 5.48E-01 | 9.11E-01 | 12.4     | 12.3 | 12.0 | 12.6 | 12.2 | 12.5 | 12.2 | 12.8 | 12.6 |      |
| 600 | Rv2358  | MAP2138  | 74 | Probable transcriptional regulatory protein SmtB (probably Ars) Rv2358.4167           | 9.08E-01     | 9.81E-01 | 0.56     | 9.05E-01 | 9.80E-01 | 12.5     | 12.6 | 12.1 | 13.0 | 12.7 | 12.5 | 11.9 | 13.1 | 12.5 |      |
| 601 | Rv3058c | MAP3108c | 70 | Possible transcriptional regulatory protein (probably TetR-fam) Rv3058c.4494          | 4.32E-01     | 8.35E-01 | 0.33     | 5.48E-01 | 9.11E-01 | 12.6     | 12.8 | 12.4 | 13.1 | 12.7 | 12.5 | 12.0 | 13.0 | 12.5 |      |
| 602 | Rv3883c | MAP3787  | 45 | Membrane-anchored mycosin MycP1 (serine protease) (subtilisin) Rv3883c.3793           | 8.41E-01     | 9.70E-01 | 0.56     | 9.05E-01 | 9.80E-01 | 12.5     | 12.6 | 11.4 | 13.8 | 12.0 | 12.5 | 12.2 | 12.8 | 12.6 |      |
| 603 | Rv3627c | MAP0436  | 80 | hypothetical protein                                                                  | Rv3627c.3209 | 4.19E-01 | 8.35E-01 | 0.39     | 7.14E-01 | 9.59E-01 | 12.5 | 12.6 | 12.5 | 12.8 | 12.7 | 12.5 | 12.2 | 12.8 | 12.4 |
| 604 | Rv1906c | MAP1630c | 54 | hypothetical protein                                                                  | Rv1906c.2061 | 2.97E-01 | 7.74E-01 | 0.56     | 9.05E-01 | 9.80E-01 | 12.3 | 11.8 | 10.9 | 12.7 | 12.3 | 12.5 | 11.8 | 13.2 | 12.2 |
| 605 | Rv3347c | MAP2121c | 61 | Membrane protein                                                                      | Rv3347c-sC4e | 7.44E-01 | 9.57E-01 | 0.61     | 7.14E-01 | 9.59E-01 | 12.5 | 12.4 | 12.1 | 12.7 | 12.4 | 12.5 | 12.0 | 13.0 | 12.6 |
| 606 | Rv3531c | MAP0056c | 88 | Hypothetical protein                                                                  | Rv3531c.210  | 7.32E-01 | 9.56E-01 | 0.39     | 7.14E-01 | 9.59E-01 | 12.5 | 12.6 | 12.0 | 13.2 | 12.5 | 12.5 | 12.0 | 13.0 | 12.4 |
| 607 | Rv0788  | MAP0626  | 92 | Probable phosphoribosylformylglycinamide synthase I PURG                              | Rv0788.726   | 6.28E-01 | 9.31E-01 | 0.56     | 9.05E-01 | 9.80E-01 | 12.6 | 12.9 | 11.5 | 14.4 | 12.2 | 12.5 | 12.0 | 13.0 | 12.4 |
| 608 | Rv1481  | MAP1207  | 92 | Probable membrane protein                                                             | Rv1481.1080  | 5.87E-01 | 9.13E-01 | 0.61     | 7.14E-01 | 9.59E-01 | 12.4 | 12.3 | 11.9 | 12.8 | 12.2 | 12.5 | 12.2 | 12.7 | 12.6 |
| 609 | Rv1371  | MAP0218  | 26 | Probable conserved membrane protein                                                   | Rv1371.1404  | 3.93E-01 | 8.35E-01 | 0.44     | 9.05E-01 | 9.80E-01 | 12.6 | 12.7 | 12.6 | 12.8 | 12.2 | 12.5 | 12.0 | 13.0 | 12.6 |
| 610 | Rv1816  | MAP1528  | 80 | Possible transcriptional regulatory protein                                           | Rv1816.734   | 4.87E-01 | 8.77E-01 | 0.39     | 7.14E-01 | 9.59E-01 | 12.6 | 12.8 | 12.1 | 13.4 | 12.7 | 12.5 | 12.2 | 12.8 | 12.6 |
| 611 | Rv2400c | MAP2213c | 77 | Probable sulfate-binding lipoprotein SubI                                             | Rv2400c.3676 | 5.37E-01 | 8.97E-01 | 0.33     | 5.48E-01 | 9.11E-01 | 12.6 | 12.8 | 12.0 | 13.5 | 12.9 | 12.5 | 12.2 | 12.7 | 12.5 |
| 612 | Rv3141  | MAP0263c | 84 | Probable NADPH quinone oxidoreductase FadB4 (NADPH:quinone oxidoreductase) Rv3141.918 | 8.32E-01     | 9.70E-01 | 0.56     | 9.05E-01 | 9.80E-01 | 12.5     | 12.4 | 12.3 | 12.5 | 12.5 | 12.5 | 12.0 | 12.9 | 12.5 |      |
| 613 | Rv2781c | MAP2889c | 78 | Possible alanine rich oxidoreductase                                                  | Rv2781c.4538 | 9.00E-01 | 9.78E-01 | 0.50     | 1.00E+00 | 1.00E+00 | 12.5 | 12.5 | 11.9 | 13.1 | 12.3 | 12.5 | 12.0 | 12.9 | 12.7 |
| 614 | Rv0361  | MAP3863c | 68 | Probable conserved membrane protein                                                   | Rv0361.1241  | 9.51E-01 | 9.82E-01 | 0.44     | 9.05E-01 | 9.80E-01 | 12.5 | 12.5 | 11.7 | 13.3 | 12.6 | 12.5 | 12.1 | 12.9 | 12.6 |
| 615 | Rv3558  | MAP3939c | 51 | PPE family protein PPE64                                                              | Rv3558.4106  | 9.14E-01 | 9.81E-01 | 0.56     | 9.05E-01 | 9.80E-01 | 12.5 | 12.4 | 11.7 | 13.2 | 12.3 | 12.5 | 12.2 | 12.7 | 12.6 |
| 616 | Rv2520c | MAP0103c | 71 | Possible conserved membrane protein                                                   | Rv2520c.2352 | 1.38E-01 | 6.83E-01 | 0.17     | 1.67E-01 | 8.62E-01 | 12.6 | 12.9 | 12.9 | 12.9 | 12.9 | 12.5 | 12.0 | 13.0 | 12.4 |
| 617 | Rv3105c | MAP3175c | 93 | Probable peptide chain release factor 2 PrfB (RF-2)                                   | Rv3105c.2824 | 6.83E-02 | 6.48E-01 | 0.89     | 9.52E-02 | 7.98E-01 | 12.3 | 12.0 | 11.7 | 12.3 | 11.9 | 12.5 | 12.2 | 12.8 | 12.5 |
| 618 | Rv3623  | MAP0440c | 73 | Probable conserved lipoprotein LpqG                                                   | Rv3623.1526  | 7.52E-01 | 9.61E-01 | 0.56     | 9.05E-01 | 9.80E-01 | 12.4 | 12.3 | 11.4 | 13.2 | 12.3 | 12.5 | 12.2 | 12.7 | 12.5 |
| 619 | Rv1194c | MAP1995  | 27 | hypothetical protein                                                                  | Rv1194c.4555 | 8.77E-01 | 9.72E-01 | 0.44     | 9.05E-01 | 9.80E-01 | 12.5 | 12.5 | 11.8 | 13.2 | 12.2 | 12.5 | 12.0 | 12.9 | 12.5 |
| 620 | Rv1016c | MAP0981c | 67 | Probable conserved lipoprotein LpqT                                                   | Rv1016c.48   | 6.95E-01 | 9.51E-01 | 0.42     | 7.95E-01 | 9.80E-01 | 12.5 | 12.5 | 12.3 | 12.8 | 12.5 | 12.5 | 12.1 | 12.8 | 12.5 |
| 621 | Rv3392c | MAP0135  | 70 | Cyclopropane-fatty-acyl-phospholipid synthase 1 CmaA1 (cyclo) Rv3392c.4226            | 1.68E-01     | 6.83E-01 | 0.89     | 9.52E-02 | 7.98E-01 | 12.3     | 12.0 | 11.5 | 12.4 | 11.9 | 12.5 | 12.1 | 12.8 | 12.5 |      |
| 622 | Rv2928  | MAP3745  | 29 | Probable thioesterase TesA                                                            | Rv2928.3350  | 9.45E-01 | 9.82E-01 | 0.50     | 1.00E+00 | 1.00E+00 | 12.4 | 12.6 | 12.6 | 12.4 | 12.5 | 12.2 | 12.7 | 12.5 | 12.5 |
| 623 | Rv0671  | MAP4288  | 52 | Possible conserved lipoprotein LpqP                                                   | Rv0671.3068  | 2.84E-01 | 7.74E-01 | 0.78     | 2.62E-01 | 8.76E-01 | 12.  |      |      |      |      |      |      |      |      |



Table S3 continued

|     |         |          |    |                                                                     |               |          |          |      |          |          |      |      |      |      |      |      |      |      |      |
|-----|---------|----------|----|---------------------------------------------------------------------|---------------|----------|----------|------|----------|----------|------|------|------|------|------|------|------|------|------|
| 637 | Rv3162c | MAP1089  | 41 | Possible integral membrane protein                                  | Rv3162c.707   | 5.82E-01 | 9.11E-01 | 0.61 | 7.14E-01 | 9.59E-01 | 12.3 | 12.0 | 11.0 | 13.0 | 12.2 | 12.4 | 11.7 | 13.1 | 12.1 |
| 638 | Rv0538  | MAP4034  | 50 | Possible conserved membrane protein                                 | Rv0538.2050   | 9.03E-01 | 9.80E-01 | 0.44 | 9.05E-01 | 9.80E-01 | 12.4 | 12.5 | 11.4 | 13.6 | 12.1 | 12.4 | 11.8 | 13.0 | 12.4 |
| 639 | Rv1589  | MAP1283  | 89 | Probable biotin synthetase BioB                                     | Rv1589.4244   | 3.93E-01 | 8.35E-01 | 0.67 | 5.48E-01 | 9.11E-01 | 12.3 | 12.1 | 11.8 | 12.4 | 12.2 | 12.4 | 11.8 | 12.9 | 12.5 |
| 640 | Rv1021  | MAP0988  | 74 | hypothetical protein                                                | Rv1021.3969   | 4.13E-01 | 8.35E-01 | 0.61 | 7.14E-01 | 9.59E-01 | 12.3 | 12.0 | 11.5 | 12.6 | 11.8 | 12.4 | 11.8 | 13.0 | 12.3 |
| 641 | Rv2027c | MAP2078c | 44 | Two component sensor histidine kinase DosT                          | Rv2027c.1690  | 2.77E-01 | 7.74E-01 | 0.67 | 5.48E-01 | 9.11E-01 | 12.3 | 12.0 | 11.7 | 12.3 | 12.2 | 12.4 | 11.8 | 12.9 | 12.5 |
| 642 | Rv1699  | MAP1406  | 91 | Probable CTP synthase PyrG                                          | Rv1699.3714   | 9.92E-01 | 9.98E-01 | 0.50 | 1.00E+00 | 1.00E+00 | 12.4 | 12.4 | 11.7 | 13.1 | 12.4 | 12.0 | 12.7 | 12.5 | 12.5 |
| 643 | Rv2630  | MAP1448c | 27 | Hypothetical protein                                                | Rv2630.4183   | 6.99E-01 | 9.51E-01 | 0.39 | 7.14E-01 | 9.59E-01 | 12.4 | 12.5 | 12.1 | 12.8 | 12.6 | 12.4 | 12.1 | 12.6 | 12.3 |
| 644 | Rv2033c | MAP1763c | 84 | hypothetical protein                                                | Rv2033c.1328  | 9.93E-01 | 9.98E-01 | 0.44 | 9.05E-01 | 9.80E-01 | 12.4 | 12.4 | 11.9 | 12.9 | 12.2 | 12.4 | 12.1 | 12.7 | 12.5 |
| 645 | Rv1977  | MAP4059  | 24 | hypothetical protein                                                | Rv1977.492    | 2.89E-01 | 7.74E-01 | 0.67 | 5.48E-01 | 9.11E-01 | 12.2 | 12.0 | 11.5 | 12.5 | 12.1 | 12.4 | 11.9 | 12.9 | 12.3 |
| 646 | Rv0126  | MAP3528  | 91 | Trehalose synthase TreS                                             | Rv0126.1402   | 1.96E-01 | 6.98E-01 | 0.17 | 1.67E-01 | 8.62E-01 | 12.5 | 12.8 | 12.6 | 13.1 | 12.7 | 12.4 | 11.9 | 12.9 | 12.4 |
| 647 | Rv3493c | MAP0570  | 75 | Conserved hypothetical Mce associated alanine and valine rich       | Rv3493c.2473  | 4.60E-02 | 6.27E-01 | 0.83 | 1.67E-01 | 8.62E-01 | 12.2 | 11.9 | 11.8 | 12.1 | 12.0 | 12.4 | 12.1 | 12.7 | 12.5 |
| 648 | Rv1865c | MAP1574c | 78 | Probable short-chain type dehydrogenase                             | Rv1865c.1040  | 7.59E-01 | 9.64E-01 | 0.50 | 1.00E+00 | 1.00E+00 | 12.4 | 12.6 | 11.5 | 13.7 | 12.1 | 12.4 | 12.0 | 12.8 | 12.3 |
| 649 | Rv3243c | MAP2534c | 27 | hypothetical protein                                                | Rv3243c.1334  | 7.00E-01 | 9.51E-01 | 0.50 | 1.00E+00 | 1.00E+00 | 12.3 | 12.2 | 11.7 | 12.6 | 12.3 | 12.4 | 11.4 | 13.3 | 12.2 |
| 650 | Rv2207  | MAP1948  | 83 | Probable nicotinate-nucleotide-dimethylbenzimidazol phospho         | Rv2207.2341   | 5.76E-01 | 9.06E-01 | 0.44 | 9.05E-01 | 9.80E-01 | 12.4 | 12.5 | 12.4 | 12.6 | 12.5 | 12.4 | 12.0 | 12.7 | 12.4 |
| 651 | Rv1639c | MAP0749c | 72 | hypothetical protein                                                | Rv1639c.1693  | 1.67E-01 | 6.83E-01 | 0.72 | 3.81E-01 | 8.90E-01 | 12.2 | 12.0 | 11.7 | 12.3 | 12.0 | 12.4 | 12.0 | 12.8 | 12.5 |
| 652 | Rv3536c | MAP0531  | 82 | Probable hydratase                                                  | Rv3536c.2778  | 7.23E-01 | 9.56E-01 | 0.56 | 9.05E-01 | 9.80E-01 | 12.4 | 12.6 | 11.6 | 13.6 | 12.3 | 12.4 | 12.0 | 12.7 | 12.5 |
| 653 | Rv1045  | MAP0369  | 35 | Hypothetical protein                                                | Rv1045.3519   | 9.73E-03 | 6.27E-01 | 0.06 | 4.76E-02 | 7.98E-01 | 12.7 | 13.2 | 13.1 | 13.4 | 13.3 | 12.4 | 11.9 | 12.8 | 12.3 |
| 654 | Rv2276  | MAP2033  | 29 | Cytochrome P450 121 Cyp121                                          | Rv2276.646    | 6.99E-01 | 9.51E-01 | 0.61 | 7.14E-01 | 9.59E-01 | 12.3 | 12.2 | 11.3 | 13.0 | 12.0 | 12.4 | 12.0 | 12.7 | 12.4 |
| 655 | Rv1895  | MAP1621  | 78 | Possible dehydrogenase                                              | Rv1895.4264   | 7.40E-01 | 9.57E-01 | 0.50 | 1.00E+00 | 1.00E+00 | 12.4 | 12.5 | 11.9 | 13.1 | 12.3 | 12.4 | 11.7 | 13.0 | 12.4 |
| 656 | Rv1491c | MAP1224c | 65 | hypothetical protein                                                | Rv1491c.2770  | 4.11E-01 | 8.35E-01 | 0.67 | 5.48E-01 | 9.11E-01 | 12.3 | 12.1 | 11.8 | 12.5 | 12.2 | 12.4 | 12.0 | 12.7 | 12.3 |
| 657 | Rv0801  | MAP0633  | 76 | hypothetical protein                                                | Rv0801.4442   | 8.27E-01 | 9.70E-01 | 0.44 | 9.05E-01 | 9.80E-01 | 12.4 | 12.4 | 11.8 | 13.1 | 12.6 | 12.3 | 12.0 | 12.6 | 12.5 |
| 658 | Rv3709c | MAP0311c | 93 | Aspartokinase Ask (aspartate kinase) [contains: aspartokinase       | Rv3709c.1821  | 8.49E-01 | 9.70E-01 | 0.33 | 5.48E-01 | 9.11E-01 | 12.4 | 12.4 | 11.6 | 13.3 | 12.8 | 12.3 | 12.0 | 12.7 | 12.6 |
| 659 | Rv0331  | MAP579c  | 27 | Possible dehydrogenase/reductase                                    | Rv0331.2247   | 1.01E-01 | 6.48E-01 | 0.89 | 9.52E-02 | 7.98E-01 | 12.1 | 11.6 | 11.1 | 12.2 | 11.8 | 12.3 | 11.9 | 12.8 | 12.5 |
| 660 | Rv3871  | MAP4241  | 38 | ESX conserved component EccCb1 ESX-1 type VII secretion syst        | Rv3871.605    | 2.80E-01 | 7.74E-01 | 0.33 | 5.48E-01 | 9.11E-01 | 12.4 | 12.7 | 12.5 | 12.8 | 12.2 | 12.3 | 11.8 | 12.8 | 12.3 |
| 661 | Rv2116  | MAP1840  | 55 | Conserved lipoprotein LppK                                          | Rv2116.4126   | 7.31E-01 | 9.56E-01 | 0.50 | 1.00E+00 | 1.00E+00 | 12.4 | 12.7 | 11.0 | 14.4 | 12.6 | 12.7 | 12.3 | 12.1 | 12.6 |
| 662 | Rv1445c | MAP1174c | 79 | Probable 6-phosphogluconolactonase DevB (6PGL)                      | Rv1445c.653   | 3.88E-01 | 8.35E-01 | 0.28 | 3.81E-01 | 8.90E-01 | 12.5 | 12.9 | 11.9 | 13.8 | 13.3 | 12.3 | 11.8 | 12.9 | 12.3 |
| 663 | Rv0455c | MAP3948c | 79 | hypothetical protein                                                | Rv0455c.1483  | 7.61E-01 | 9.64E-01 | 0.61 | 7.14E-01 | 9.59E-01 | 12.3 | 12.1 | 11.1 | 13.2 | 12.0 | 12.3 | 12.0 | 12.6 | 12.3 |
| 664 | Rv3182  | MAP4269c | 48 | hypothetical protein                                                | Rv3182.4153   | 2.22E-01 | 7.31E-01 | 0.83 | 1.67E-01 | 8.62E-01 | 12.2 | 12.0 | 11.7 | 12.3 | 12.0 | 12.3 | 12.1 | 12.5 | 12.4 |
| 665 | Rv2476c | MAP0863  | 83 | Probable NAD-dependent glutamate dehydrogenase Gdh (NAD             | Rv2476c-s2.14 | 8.87E-01 | 9.75E-01 | 0.56 | 9.05E-01 | 9.80E-01 | 12.3 | 12.4 | 11.3 | 13.4 | 12.1 | 12.3 | 12.0 | 12.6 | 12.4 |
| 666 | Rv0103c | MAP4284  | 47 | Probable cation-transporter P-type ATPase B CtpB                    | Rv0103c.1414  | 2.08E-01 | 7.15E-01 | 0.33 | 5.48E-01 | 9.11E-01 | 12.4 | 12.6 | 12.4 | 12.7 | 12.6 | 12.3 | 11.9 | 12.7 | 12.4 |
| 667 | Rv0464c | MAP3958c | 67 | hypothetical protein                                                | Rv0464c.2354  | 5.57E-01 | 8.97E-01 | 0.50 | 1.00E+00 | 1.00E+00 | 12.3 | 12.5 | 12.2 | 12.8 | 12.3 | 12.3 | 11.8 | 12.8 | 12.4 |
| 668 | Rv1362c | MAP0750c | 70 | Possible membrane protein                                           | Rv1362c.3616  | 7.48E-01 | 9.58E-01 | 0.33 | 5.48E-01 | 9.11E-01 | 12.3 | 12.4 | 12.1 | 12.7 | 12.3 | 12.3 | 11.8 | 12.8 | 12.1 |
| 669 | Rv1809  | MAP1153  | 62 | PPE family protein PPE33                                            | Rv1809.52     | 4.98E-01 | 8.80E-01 | 0.39 | 7.14E-01 | 9.59E-01 | 12.4 | 12.7 | 11.8 | 13.6 | 12.5 | 12.3 | 11.8 | 12.7 | 12.3 |
| 670 | Rv1067c | MAP4144  | 59 | PE-PGRS family protein PE_PGRS19                                    | Rv1067c.4309  | 5.46E-01 | 8.97E-01 | 0.58 | 7.95E-01 | 9.80E-01 | 12.2 | 12.0 | 11.2 | 12.7 | 11.8 | 12.3 | 11.9 | 12.6 | 12.5 |
| 671 | Rv2107  | MAP2576c | 45 | PE family protein PE22                                              | Rv2107.2933   | 4.06E-01 | 8.35E-01 | 0.67 | 5.48E-01 | 9.11E-01 | 12.2 | 12.1 | 11.8 | 12.4 | 12.0 | 12.3 | 12.0 | 12.5 | 12.4 |
| 672 | Rv3690  | MAP0361c | 68 | Probable conserved membrane protein                                 | Rv3690.1604   | 9.24E-01 | 9.81E-01 | 0.56 | 9.05E-01 | 9.80E-01 | 12.2 | 12.2 | 11.3 | 13.1 | 12.0 | 12.3 | 11.9 | 12.6 | 12.4 |
| 673 | Rv0432  | MAP3921  | 73 | Periplasmic superoxide dismutase [Cu-Zn] SodC                       | Rv0432.2344   | 5.33E-01 | 8.97E-01 | 0.33 | 5.48E-01 | 9.11E-01 | 12.4 | 12.8 | 11.3 | 14.3 | 12.5 | 12.2 | 11.7 | 12.8 | 12.3 |
| 674 | Rv2393  | MAP2037  | 69 | Ferrochelatase Che1                                                 | Rv2393.1039   | 4.45E-01 | 8.42E-01 | 0.67 | 5.48E-01 | 9.11E-01 | 12.1 | 11.7 | 10.8 | 12.6 | 11.6 | 12.2 | 11.5 | 13.0 | 12.1 |
| 675 | Rv1263  | MAP2509c | 82 | Probable amidase AmiB2 (aminohydrolase)                             | Rv1263.2262   | 9.12E-01 | 9.81E-01 | 0.44 | 9.05E-01 | 9.80E-01 | 12.2 | 12.2 | 11.4 | 12.9 | 11.8 | 12.2 | 11.8 | 12.7 | 12.4 |
| 676 | Rv0360c | MAP3864  | 85 | hypothetical protein                                                | Rv0360c.2934  | 9.66E-01 | 9.84E-01 | 0.61 | 7.14E-01 | 9.59E-01 | 12.2 | 12.2 | 11.3 | 13.1 | 12.0 | 12.2 | 12.0 | 12.5 | 12.3 |
| 677 | Rv0764c | MAP0598c | 79 | Cytochrome P450 51 Cyp51 (CYPL1) (P450-L1A1) (sterol 14- $\alpha$ - | Rv0764c.2948  | 2.99E-01 | 7.74E-01 | 0.56 | 9.05E-01 | 9.80E-01 | 12.1 | 11.7 | 11.2 | 12.2 | 11.9 | 12.2 | 11.4 | 13.0 | 11.9 |
| 678 | Rv1123c | MAP0740c | 75 | Possible peroxidase BpoB (non-haem peroxidase)                      | Rv1123c.2504  | 8.56E-01 | 9.70E-01 | 0.50 | 1.00E+00 | 1.00E+00 | 12.3 | 12.3 | 11.4 | 13.3 | 11.9 | 12.2 | 11.9 | 12.6 | 12.4 |
| 679 | Rv1387  | MAP3490  | 47 | PPE family protein PPE20                                            | Rv1387.1810   | 7.61E-01 | 9.64E-01 | 0.39 | 7.14E-01 | 9.59E-01 | 12.3 | 12.4 | 11.9 | 12.9 | 12.3 | 12.2 | 11.3 | 13.1 | 12.0 |
| 680 | Rv3800c | MAP0220  | 82 | Polyketide synthase Pks13                                           | Rv3800c-s1.27 | 9.94E-01 | 9.98E-01 | 0.61 | 7.14E-01 | 9.59E-01 | 12.2 | 12.2 | 11.2 | 13.2 | 11.8 | 12.2 | 11.9 | 12.5 | 12.2 |
| 681 | Rv0453  | MAP3490  | 58 | PPE family protein PPE11                                            | Rv0453.1699   | 9.43E-01 | 9.82E-01 | 0.50 | 1.00E+00 | 1.00E+00 | 12.2 | 12.2 | 11.7 | 12.8 | 12.2 | 12.2 | 11.9 | 12.5 | 12.3 |
| 682 | Rv0951  | MAP0896  | 89 | Probable succinyl-CoA synthetase (beta chain) SucC (SCS-beta)       | Rv0951.1952   | 9.55E-01 | 9.82E-01 | 0.56 | 9.05E-01 | 9.80E-01 | 12.2 | 12.2 | 11.1 | 13.4 | 11.8 | 12.2 | 11.5 | 12.9 | 11.8 |
| 683 | Rv2387  | MAP2206  | 78 | hypothetical protein                                                | Rv2387.1682   | 3.74E-01 | 8.34E-01 | 0.72 | 3.81E-01 | 8.90E-01 | 12.1 | 11.8 | 11.1 | 12.5 | 11.7 | 12.2 | 11.8 | 12.6 | 12.4 |
| 684 | Rv2933  | MAP3764c | 38 | Phenolphthiocerol synthesis type-I polyketide synthase PpsC         | Rv2933-s4.27  | 7.24E-01 | 9.56E-01 | 0.56 | 9.05E-01 | 9.80E-01 | 12.1 | 12.0 | 10.9 | 13.0 | 11.7 | 12.2 | 11.8 | 12.6 | 12.2 |
| 685 | Rv0905  | MAP0840  | 91 | Possible enoyl-CoA hydratase Echa6E (enoyl hydratase) (unsatur      | Rv0905.1205   | 8.72E-01 | 9.70E-01 | 0.61 | 7.14E-01 | 9.59E-01 | 12.2 | 12.3 | 11.6 | 12.9 | 12.0 | 12.2 | 11.7 | 12.7 | 12.3 |
| 686 | Rv1975  | MAP0281  | 70 | hypothetical protein                                                | Rv1975.2646   | 9.36E-01 | 9.82E-01 | 0.39 | 7.14E-01 | 9.59E-01 | 12.2 | 12.2 | 11.8 | 12.6 | 12.1 | 12.2 | 11.7 | 12.6 | 11.9 |
| 687 | Rv1394c | MAP0086  | 27 | Probable cytochrome P450 132 Cyp132                                 | Rv1394c.1786  | 9.20E-01 | 9.81E-01 | 0.56 | 9.05E-01 | 9.80E-01 | 12.1 | 12.1 | 11.1 | 13.1 | 12.0 | 12.2 | 11.7 | 12.6 | 12.4 |
| 688 | Rv2490c | MAP4144  | 62 | PE-PGRS family protein PE_PGRS43                                    | Rv2490c-s2.84 | 8.59E-01 | 9.70E-01 | 0.56 | 9.05E-01 | 9.80E-01 | 12.1 | 12.0 | 10.9 | 13.1 | 11.7 | 12.1 | 11.7 | 12.6 | 12.1 |
| 689 | Rv3567c | MAP0500  | 88 | Possible oxidoreductase Possible 3-hydroxy-9,10-seconandro          | Rv3567c.1294  | 6.49E-01 | 9.34E-01 | 0.44 | 9.05E-01 | 9.80E-01 | 12.2 | 12.4 | 11.5 | 13.2 | 12.1 | 12.1 | 11.9 | 12.4 | 12.2 |
| 690 | Rv2091c | MAP1826c | 62 | Probable membrane protein                                           | Rv2091c.75    | 4.37E-02 | 6.27E-01 | 0.00 | 2.38E-02 | 7.98E-01 | 12.4 | 12.9 | 12.5 | 13.3 | 12.8 | 12.8 | 11.9 | 12.4 | 12.2 |
| 691 | Rv2606c | MAP2710c | 92 | Possible pyridoxine biosynthesis protein SnpZ                       | Rv2606c.3370  | 2.54E-02 | 6.27E-01 | 0.94 | 4.76E-02 | 7.98E-01 | 11.9 | 11.4 | 11.1 | 11.8 | 11.5 | 12.1 | 11.8 | 12.4 | 12.1 |
| 692 | Rv2162c | MAP4144  | 66 | PE-PGRS family protein PE_PGRS38                                    | Rv2162c-s9    | 1.73E-02 | 6.27E-01 | 0.00 | 2.38E-02 | 7.98E-01 | 12.5 | 13.3 | 12.9 | 13.8 | 13.3 | 12.1 | 11.8 | 12.3 | 12.2 |
| 693 | Rv3431c | MAP2274  | 64 | Possible transposase (fragment)                                     | Rv3431c.756   | 2.89E-01 | 7.74E-01 | 0.72 | 3.81E-01 | 8.90E-01 | 11.9 | 11.5 | 10.7 | 13.3 | 11.6 | 12.1 | 11.7 | 12.5 | 12.1 |
| 694 | Rv3791  | MAP0234c | 88 | Decaprenylphosphoryl-D-2-keto erythro pentose reductase             | Rv3791.747    | 7.98E-01 | 9.65E-01 | 0.56 | 9.05E-01 | 9.80E-01 | 12.0 | 11.9 | 10.6 | 13.2 | 11.7 |      |      |      |      |

Table S3 continued

|     |         |          |    |                                                                            |              |          |          |          |          |          |      |      |      |      |      |      |      |      |      |
|-----|---------|----------|----|----------------------------------------------------------------------------|--------------|----------|----------|----------|----------|----------|------|------|------|------|------|------|------|------|------|
| 708 | Rv1244  | MAP2539c | 71 | Probable lipoprotein LpqZ                                                  | Rv1244.2635  | 3.67E-01 | 8.32E-01 | 0.67     | 5.48E-01 | 9.11E-01 | 11.8 | 11.5 | 10.9 | 12.2 | 11.6 | 11.9 | 11.5 | 12.3 | 12.0 |
| 709 | Rv2964  | MAP0902  | 41 | Probable formyltetrahydrofolate deformylase PurU (formyl-FH Rv2964.3373    | 5.85E-01     | 9.12E-01 | 0.44     | 9.05E-01 | 9.80E-01 | 12.0     | 12.1 | 11.7 | 12.6 | 12.1 | 11.9 | 11.3 | 12.5 | 11.8 | 11.8 |
| 710 | Rv3704c | MAP0306c | 74 | Glutamate-cysteine ligase GshA (gamma-glutamylcysteine syn Rv3704c.1955    | 3.87E-01     | 8.35E-01 | 0.28     | 3.81E-01 | 8.90E-01 | 12.1     | 12.4 | 11.5 | 13.3 | 12.5 | 11.9 | 11.4 | 12.4 | 11.9 | 11.9 |
| 711 | Rv3282  | MAP3401  | 65 | hypothetical protein                                                       | Rv3282.1304  | 7.31E-01 | 9.56E-01 | 0.39     | 7.14E-01 | 9.59E-01 | 12.0 | 12.1 | 10.9 | 13.3 | 12.0 | 11.9 | 11.5 | 12.3 | 11.9 |
| 712 | Rv2074  | MAP1820  | 93 | Possible pyridoxamine 5'-phosphate oxidase (PNP/PMP oxidasi Rv2074.1283    | 6.60E-01     | 9.36E-01 | 0.56     | 9.05E-01 | 9.80E-01 | 11.8     | 11.6 | 10.9 | 12.3 | 11.6 | 11.9 | 11.0 | 12.7 | 11.6 | 11.6 |
| 713 | Rv1061  | MAP1010  | 75 | hypothetical protein                                                       | Rv1061.3931  | 2.32E-01 | 7.42E-01 | 0.67     | 5.48E-01 | 9.11E-01 | 11.7 | 11.4 | 10.9 | 11.8 | 11.2 | 11.8 | 11.3 | 12.3 | 12.0 |
| 714 | Rv3608c | MAP0450  | 81 | Dihydropteroate synthase 1 FolP (DHPS 1) (dihydropteroate py Rv3608c.1912  | 5.85E-01     | 9.12E-01 | 0.39     | 7.14E-01 | 9.59E-01 | 11.8     | 12.1 | 10.9 | 13.2 | 11.8 | 11.7 | 11.4 | 12.0 | 11.7 | 11.7 |
| 715 | Rv1024  | MAP0991  | 73 | Possible conserved membrane protein                                        | Rv1024.3517  | 7.53E-01 | 9.61E-01 | 0.44     | 9.05E-01 | 9.80E-01 | 11.7 | 11.9 | 11.1 | 12.7 | 11.5 | 11.7 | 11.2 | 12.1 | 11.8 |
| 716 | Rv0208c | MAP3643c | 66 | Hypothetical methyltransferase (methylase)                                 | Rv0208c.460  | 1.10E-01 | 6.48E-01 | 0.11     | 9.52E-02 | 7.98E-01 | 12.0 | 12.6 | 11.8 | 13.3 | 12.5 | 11.6 | 11.2 | 12.1 | 11.6 |
| 717 | Rv2231c | MAP1983c | 29 | Possible aminotransferase CobC                                             | Rv2231c.4261 | 4.90E-01 | 8.77E-01 | 0.67     | 5.48E-01 | 9.11E-01 | 11.5 | 11.3 | 11.0 | 11.7 | 11.2 | 11.6 | 11.1 | 12.0 | 11.9 |
| 718 | Rv1665  | MAP1372  | 76 | Chalcone synthase Pks11                                                    | Rv1665.1643  | 5.36E-01 | 8.97E-01 | 0.72     | 3.81E-01 | 8.90E-01 | 11.4 | 11.3 | 10.9 | 11.6 | 11.4 | 11.5 | 11.0 | 11.9 | 11.6 |
| 719 | Rv3390  | MAP3481  | 67 | Probable conserved lipoprotein LpqD                                        | Rv3390.3205  | 7.57E-01 | 9.64E-01 | 0.39     | 7.14E-01 | 9.59E-01 | 11.5 | 11.6 | 10.7 | 12.4 | 11.9 | 11.4 | 11.0 | 11.9 | 11.5 |
| 720 | Rv2200c | MAP1940c | 79 | Probable transmembrane cytochrome C oxidase (subunit II) Ct:Rv2200c.2919   | 4.18E-01     | 8.35E-01 | 0.33     | 5.48E-01 | 9.11E-01 | 11.6     | 11.9 | 10.9 | 12.9 | 11.6 | 11.4 | 11.1 | 11.8 | 11.4 | 11.4 |
| 721 | Rv3834c | MAP0197  | 88 | SERYL-tRNA synthetase SerS (serine-tRNA ligase) (SERRS) (seri Rv3834c.3688 | 9.79E-01     | 9.90E-01 | 0.50     | 1.00E+00 | 1.00E+00 | 11.4     | 11.4 | 9.3  | 13.6 | 10.5 | 11.4 | 10.2 | 12.6 | 10.9 | 10.9 |
| 722 | Rv3372  | MAP1747c | 73 | Trehalose 6-phosphate phosphatase OtsB2 (trehalose-phosphat Rv3372.2531    | 6.02E-01     | 9.20E-01 | 0.44     | 9.05E-01 | 9.80E-01 | 11.3     | 11.6 | 10.3 | 12.8 | 11.2 | 11.2 | 11.0 | 11.4 | 11.2 | 11.2 |
| 723 | Rv0993  | MAP0924  | 88 | UTP-glucose-1-phosphate uridylyltransferase GalU (UDP-glucoc Rv0993.2505   | 3.16E-01     | 7.83E-01 | 0.28     | 3.81E-01 | 8.90E-01 | 11.5     | 12.2 | 10.7 | 13.6 | 11.8 | 11.2 | 10.6 | 11.8 | 11.4 | 11.4 |
| 724 | Rv2268c | MAP2584  | 34 | Probable cytochrome P450 128 Cyp128                                        | Rv2268c.4099 | 2.06E-01 | 7.15E-01 | 0.28     | 3.81E-01 | 8.90E-01 | 11.5 | 12.2 | 11.1 | 13.3 | 12.4 | 11.2 | 11.0 | 11.3 | 11.2 |
| 725 | Rv0148  | MAP3567  | 88 | Probable short-chain type dehydrogenase/reductase                          | Rv0148.1907  | 9.73E-01 | 9.89E-01 | 0.44     | 9.05E-01 | 9.80E-01 | 11.0 | 11.0 | 10.3 | 11.7 | 11.1 | 11.0 | 10.6 | 11.4 | 11.1 |
| 726 | Rv2184c | MAP1922c | 81 | hypothetical protein                                                       | Rv2184c.1373 | 6.53E-04 | 2.38E-01 | 0.00     | 2.38E-02 | 7.98E-01 | 11.5 | 12.8 | 12.4 | 13.1 | 12.8 | 10.9 | 10.4 | 11.4 | 11.2 |
| 727 | Rv2252  | MAP2005  | 79 | Diacylglycerol kinase                                                      | Rv2252.4240  | 3.47E-01 | 8.22E-01 | 0.28     | 3.81E-01 | 8.90E-01 | 10.9 | 11.6 | 9.9  | 13.4 | 11.5 | 10.6 | 10.3 | 10.8 | 10.7 |
| 728 | Rv2315c | MAP2089c | 85 | hypothetical protein                                                       | Rv2315c.2860 | 7.76E-06 | 5.66E-03 | 0.00     | 2.38E-02 | 7.98E-01 | 11.3 | 13.0 | 12.7 | 13.2 | 12.9 | 10.5 | 10.3 | 10.7 | 10.5 |
| 729 | Rv2349c | MAP2149c | 33 | Probable phospholipase C 3 PlcC                                            | Rv2349c.3255 | 1.48E-01 | 6.83E-01 | 0.06     | 4.89E-02 | 7.98E-01 | 10.8 | 12.1 | 10.5 | 13.7 | 12.8 | 10.2 | 9.9  | 10.6 | 10.0 |

<sup>a</sup>Rank=Strongest to weakest mean signal intensity among clinical cows.

<sup>b</sup>Mean all samples=signal intensity average of all subclinical and clinical serum samples.

Table S4

Table S4. Top 30 differentially reactive *Mtb* proteins ranked by P-value

| TB protein | MAP K-10 locus tag | Description                                                                                                | P-value <sup>a</sup> | BH P-value <sup>b</sup> | Mean Subclinical Cows (95% CI) | Mean Clinical Cows (95% CI) |
|------------|--------------------|------------------------------------------------------------------------------------------------------------|----------------------|-------------------------|--------------------------------|-----------------------------|
| Rv2315c    | MAP2089c           | Hypothetical protein                                                                                       | 7.80E-06             | 5.70E-03                | 13.0 (12.7-13.2)               | 10.5 (10.3-10.7)            |
| Rv2184c    | MAP1922c           | Hypothetical protein                                                                                       | 6.50E-04             | 2.40E-01                | 12.8 (12.4-13.1)               | 10.9 (10.4-11.4)            |
| Rv1968     | MAP2114c           | Mce-family protein Mce3C                                                                                   | 2.20E-03             | 4.10E-01                | 13.0 (13.0-13.1)               | 13.6 (13.4-13.7)            |
| Rv2878c    | MAP2942c           | Soluble secreted antigen Mpt53 precursor                                                                   | 2.30E-03             | 4.10E-01                | 11.7 (11.0-12.4)               | 14.8 (14.3-15.2)            |
| Rv3695     | MAP0356c           | Possible conserved membrane protein                                                                        | 4.20E-03             | 6.10E-01                | 11.8 (11.6-12.1)               | 12.7 (12.4-13.0)            |
| Rv1290c    | MAP1726c           | Hypothetical protein                                                                                       | 6.30E-03             | 6.30E-01                | 11.7 (11.5-11.9)               | 12.9 (12.4-13.5)            |
| Rv0442c    | MAP3939c           | PPE family protein PPE10                                                                                   | 8.90E-03             | 6.30E-01                | 12.8 (12.6-12.9)               | 13.7 (13.2-14.1)            |
| Rv0312     | MAP3800            | Conserved hypothetical proline and threonine rich protein                                                  | 9.10E-03             | 6.30E-01                | 12.5 (12.3-12.6)               | 12.9 (12.7-13.1)            |
| Rv1045     | MAP0369            | Hypothetical protein                                                                                       | 9.70E-03             | 6.30E-01                | 13.2 (13.1-13.4)               | 12.4 (11.9-12.8)            |
| Rv0355c    | MAP3939c           | PPE family protein PPE8                                                                                    | 1.10E-02             | 6.30E-01                | 12.1 (11.9-12.3)               | 12.7 (12.4-13.0)            |
| Rv2962c    | MAP2851c           | Possible glycosyl transferase                                                                              | 1.10E-02             | 6.30E-01                | 12.3 (12.0-12.7)               | 13.2 (12.9-13.4)            |
| Rv1779c    | MAP1493c           | Possible integral membrane protein                                                                         | 1.20E-02             | 6.30E-01                | 12.4 (12.2-12.6)               | 13.1 (12.8-13.5)            |
| Rv3267     | MAP3381            | Conserved protein (CPSA-related protein)                                                                   | 1.40E-02             | 6.30E-01                | 13.3 (13.1-13.4)               | 13.7 (13.5-13.9)            |
| Rv2162c    | MAP4144            | PE-PGRS family protein PE_PGRS38                                                                           | 1.70E-02             | 6.30E-01                | 13.3 (12.9-13.8)               | 12.1 (11.8-12.3)            |
| Rv0901     | MAP2837c           | Possible conserved exported or membrane protein                                                            | 1.80E-02             | 6.30E-01                | 12.3 (12.1-12.5)               | 12.9 (12.6-13.3)            |
| Rv0155     | MAP3572            | Probable NAD(P) transhydrogenase (subunit alpha) PntAa                                                     | 1.90E-02             | 6.30E-01                | 12.5 (12.2-12.8)               | 13.1 (12.9-13.3)            |
| Rv3884c    | MAP0167            | ESX conserved component EccA2 ESX-2 type VII secretion system protein<br>Probable CbxX/CfqX family protein | 2.00E-02             | 6.30E-01                | 12.3 (12.2-12.5)               | 12.9 (12.6-13.3)            |
| Rv2458     | MAP2279            | Probable homocysteine S-methyltransferase MmuM                                                             | 2.10E-02             | 6.30E-01                | 12.5 (12.3-12.7)               | 13.0 (12.8-13.3)            |
| Rv0729     | MAP4195            | Possible D-xylulose kinase XylB                                                                            | 2.30E-02             | 6.30E-01                | 12.5 (12.3-12.6)               | 13.0 (12.7-13.3)            |
| Rv3629c    | MAP0434            | Probable conserved integral membrane protein                                                               | 2.40E-02             | 6.30E-01                | 12.7 (12.5-12.9)               | 13.2 (12.9-13.4)            |
| Rv1145     | MAP2635c           | Probable conserved transmembrane transport protein MmpL13a                                                 | 2.50E-02             | 6.30E-01                | 12.6 (12.3-12.9)               | 13.4 (13.0-13.7)            |
| Rv0535     | MAP4030            | Probable 5'-methylthioadenosine phosphorylase Pnp                                                          | 2.50E-02             | 6.30E-01                | 12.3 (12.2-12.4)               | 12.6 (12.4-12.9)            |
| Rv2606c    | MAP2710c           | Possible pyridoxine biosynthesis protein SnzP                                                              | 2.50E-02             | 6.30E-01                | 11.4 (11.1-11.8)               | 12.1 (11.8-12.4)            |
| Rv3869     | MAP3779            | ESX conserved component EccB1 ESX-1 type VII secretion system protein<br>Possible membrane protein         | 2.50E-02             | 6.30E-01                | 12.7 (12.4-13.0)               | 13.4 (13.1-13.7)            |
| Rv0959     | MAP0906            | hypothetical protein                                                                                       | 2.60E-02             | 6.30E-01                | 12.4 (12.3-12.5)               | 12.8 (12.6-13.1)            |
| Rv3163c    | MAP3217c           | Possible conserved secreted protein                                                                        | 2.70E-02             | 6.30E-01                | 12.5 (12.3-12.7)               | 13.1 (12.7-13.4)            |
| Rv3766     | MAP1313c           | Hypothetical protein                                                                                       | 2.80E-02             | 6.30E-01                | 13.4 (13.3-13.5)               | 13.9 (13.6-14.3)            |
| Rv3470c    | MAP3038c           | Probable acetolactate synthase (large subunit) IlvB2                                                       | 2.80E-02             | 6.30E-01                | 12.1 (11.9-12.4)               | 12.9 (12.4-13.3)            |
| Rv2051c    | MAP1800c           | Polyprenol-monophosphomannose synthase Ppm1                                                                | 2.80E-02             | 6.30E-01                | 12.7 (12.5-13.0)               | 13.4 (13.0-13.7)            |
| Rv2589     | MAP1041c           | 4-aminobutyrate aminotransferase GabT                                                                      | 2.80E-02             | 6.30E-01                | 12.0 (11.7-12.3)               | 12.7 (12.5-12.8)            |

<sup>a</sup> Student's T-test P value; 5.0E-2 = 0.05.<sup>b</sup> P-value adjusted for the false discovery rate using the Benjamini-Hochberg (BH) method.

Table S5

Table S5. Mtb proteins with the highest infection to control ratios

| Mtb ID     | MAP ID      | SubClinical/Neg | Clinical/Neg | Description                                                                                                                                                                                |
|------------|-------------|-----------------|--------------|--------------------------------------------------------------------------------------------------------------------------------------------------------------------------------------------|
| Rv2315c    | MAP2089c    | 3.17            | 1.90         | hypothetical protein                                                                                                                                                                       |
| Rv0993     | No ortholog | 2.30            | 2.03         | UTP--glucose-1-phosphate uridylyltransferase GalU (UDP-glucose pyrophosphorylase) (UDPGP) (alpha-D-glucosyl-1-phosphate uridylyltransferase) (uridine diphosphoglucose pyrophosphorylase)  |
| Rv0752c    | MAP4214c    | 2.28            | 2.06         | Probable acyl-CoA dehydrogenase FadE9                                                                                                                                                      |
| Rv2252     | MAP2005     | 2.26            | 2.00         | Diacylglycerol kinase                                                                                                                                                                      |
| Rv2162c    | No ortholog | 2.22            | 1.99         | PE-PGRS family protein PE_PGRS38                                                                                                                                                           |
| Rv0172     | MAP3607     | 2.03            | 2.05         | Mce-family protein Mce1D                                                                                                                                                                   |
| Rv2349c    | MAP2149c    | 2.01            | 1.87         | Probable phospholipase C 3 PlcC                                                                                                                                                            |
| Rv3704c    | MAP0306c    | 1.98            | 2.06         | Glutamate--cysteine ligase GshA (gamma-glutamylcysteine synthetase) (gamma-ECS) (GCS) (gamma-glutamyl-L-cysteine synthetase)                                                               |
| Rv3175     | No ortholog | 1.93            | 2.01         | Possible amidase (aminohydrolase)                                                                                                                                                          |
| Rv0938     | MAP0880     | 1.88            | 2.01         | ATP dependent DNA ligase LigD (ATP dependent polydeoxyribonucleotide synthase) (thermostable DNA ligase) (ATP dependent polynucleotide ligase) (sealase) (DNA repair enzyme) (DNA joinase) |
| Rv2921c    | MAP2989c    | 1.88            | 2.01         | Probable cell division protein FtsY (SRP receptor) (signal recognition particle receptor)                                                                                                  |
| Rv2195     | MAP1934     | 1.83            | 2.04         | Probable rieske iron-sulfur protein QcrA                                                                                                                                                   |
| Rv0432     | MAP2131c    | 1.81            | 2.03         | Periplasmic superoxide dismutase [Cu-Zn] SodC                                                                                                                                              |
| Rv1445c    | MAP1174c    | 1.77            | 2.03         | Probable 6-phosphogluconolactonase DevB (6PGL)                                                                                                                                             |
| Rv1045     | No ortholog | 1.73            | 1.99         | Hypothetical protein                                                                                                                                                                       |
| Rv3651     | MAP0421c    | 1.71            | 1.97         | hypothetical protein                                                                                                                                                                       |
| Rv1527c-s1 | No ortholog | 1.71            | 2.05         | Probable polyketide synthase Pks5                                                                                                                                                          |
| Rv0458     | MAP3952     | 1.70            | 2.02         | Probable aldehyde dehydrogenase                                                                                                                                                            |
| Rv1020-s1  | No ortholog | 1.70            | 2.09         | Probable transcription-repair coupling factor Mfd (TRCF)                                                                                                                                   |
